# Supplementary material for: Intergenerational adaptations to stress are evolutionarily conserved, stress-specific, and have deleterious trade-offs
Source: eLife. 2021 Oct 8;10:e73425. doi: 10.7554/eLife.73425 (PMC8570697; doi:10.7554/eLife.73425)
Supplement: Figure 1—source data 1. [file elife-73425-fig1-data1.xlsx]

## Sheet: Fig. 1A-F
	Species	C. elegans	C. elegans	C. briggsae	C. briggsae	C. kamaaina	C. kamaaina	C. tropicalis	C. tropicalis
Fig. 1B	Parental environment	E. coli	P. vranovensis	E. coli	P. vranovensis	E. coli	P. vranovensis	E. coli	P. vranovensis
	Percent surviving	2.8	52	51.2	0	3.5	43	0	0
	Percent surviving	3.6	28	47.7	0.4	1.5	34.5	0	0
	Percent surviving	3.6	37.2	25.3	0	3	36	0	0
	Percent surviving	2.4	36.8
Fig. 1C	RNAi	Empty vector	Empty vector	cysl-1	rhy-1
	Parental environment	E. coli	P. vranovensis	P. vranovensis	P. vranovensis
	Percent Surviving	20	93.6	2.8	0
	Percent Surviving	15.5	93.75	10.8	0
	Percent Surviving	13.5	77.6	4.61	0
Fig. 1D	Species	C. elegans	C. elegans	C. briggsae	C. briggsae	C. kamaaina	C. kamaaina	C. tropicalis	C. tropicalis
	Parental [NaCl]	50 mM	300 mM	50 mM	300 mM	50 mM	300 mM	50 mM	300 mM
	Percent Developing	1	70.5	0	56.5	1	89	0	0.5
	Percent Developing	0	43	0	75	2	68	0	1
	Percent Developing	0	56	0	69.5	1	79	0	3.5
Fig. 1E	Genotype	wild-type	wild-type	gpdh-2	gpdh-2
	Parental [NaCl]	50 mM	300 mM	50 mM	300 mM
	Percent Developing	0	52	0	0
	Percent Developing	0	70	0	0
	Percent Developing	0	51.5	0	0
Fig. 1F	Species	C. elegans	C. elegans	C. briggsae	C. briggsae	C. kamaaina	C. kamaaina	C. tropicalis	C. tropicalis
	Parental N. parisii exposure	-	+	-	+	-	+	-	+
	Percent Infected	100	84.0278	100	13.6126	58	58.2524	9.8039	2.6786
	Percent Infected	98.7952	75.6303	96.4602	12.4224	32.0388	35.2941	15.3846	7.1429
	Percent Infected	93.333	60	99.3056	15.8416	54.2169	65.0943	1.6667	3.8462
	Percent Infected	95.313	81.6

## Sheet: Fig. 1G
strain	species	replicate	pass	volume	length	middleWidth	meanWidth	surfaceArea
C. elegans_25	C. elegans	1	FALSE	20.5314	137.736	16.3596	11.929	5522.9
C. elegans_25	C. elegans	1	TRUE	16.6385	197.418	8.30041	9.65995	5980.95
C. elegans_25	C. elegans	1	TRUE	40.6072	215.382	16.3596	14.358	9725.1
C. elegans_25	C. elegans	1	FALSE	0.862753	28.5451	4.88353	4.23239	524.446
C. elegans_25	C. elegans	1	FALSE	24.9415	174.199	13.1241	12.8452	7067.47
C. elegans_25	C. elegans	1	FALSE	2.01437	76.7739	6.90636	5.03884	1289.73
C. elegans_25	C. elegans	1	FALSE	23.5878	166.176	19.8704	12.2045	6635.95
C. elegans_25	C. elegans	1	TRUE	26.5557	199.951	17.6078	11.8368	7608.15
C. elegans_25	C. elegans	1	TRUE	17.1201	208.023	11.8509	9.46445	6244.98
C. elegans_25	C. elegans	1	TRUE	32.2818	201.184	21.162	13.1781	8308.46
C. elegans_25	C. elegans	1	FALSE	26.9129	201.906	14.0032	12.0508	7693.01
C. elegans_25	C. elegans	1	TRUE	31.1588	206.01	19.8704	12.7087	8432.48
C. elegans_25	C. elegans	1	FALSE	715.637	157.246	95.1697	72.1803	50747.7
C. elegans_25	C. elegans	1	FALSE	6.54677	70.2865	11.3949	9.23513	2260
C. elegans_25	C. elegans	1	TRUE	19.541	189.722	16.2784	10.4207	6343.56
C. elegans_25	C. elegans	1	FALSE	0.894445	57.543	5.86927	3.3888	731.073
C. elegans_25	C. elegans	1	FALSE	6.54352	104.284	8.13922	7.18696	2587.59
C. elegans_25	C. elegans	1	FALSE	1.56129	45.3582	6.51138	4.98448	885.798
C. elegans_25	C. elegans	1	TRUE	23.8144	200.616	13.4235	11.315	7274.57
C. elegans_25	C. elegans	1	FALSE	20.5382	148.235	15.357	11.9975	5839.79
C. elegans_25	C. elegans	1	FALSE	3.55926	55.0195	5.86927	7.01106	1402.32
C. elegans_25	C. elegans	1	TRUE	27.3549	185.768	13.4235	12.7174	7480.01
C. elegans_25	C. elegans	1	FALSE	2.87182	46.0903	10.2954	7.12284	1206.12
C. elegans_25	C. elegans	1	FALSE	9.09383	77.4143	13.9083	10.8175	2909.44
C. elegans_25	C. elegans	1	FALSE	19.8181	140.294	11.8509	11.9365	5444.84
C. elegans_25	C. elegans	1	TRUE	29.2708	189.163	11.7385	12.7438	7861.86
C. elegans_25	C. elegans	1	TRUE	31.2273	219.22	14.0032	12.4756	8875.89
C. elegans_25	C. elegans	1	TRUE	26.3226	198.314	16.9952	11.9391	7552.77
C. elegans_25	C. elegans	1	FALSE	27.1704	200.813	11.8509	11.8866	7653.56
C. elegans_25	C. elegans	1	TRUE	28.2499	214.091	15.008	12.2361	8313.61
C. elegans_25	C. elegans	1	FALSE	1209.39	174.059	92.1423	90.535	64004.6
C. elegans_25	C. elegans	1	TRUE	31.889	200.057	15.008	13.215	8566.02
C. elegans_25	C. elegans	1	FALSE	323.067	200.5	50.1471	38.0977	41563.4
C. elegans_25	C. elegans	1	FALSE	25.4546	177.932	15.008	12.0733	7110.23
C. elegans_25	C. elegans	1	FALSE	1.31883	23.2426	13.9083	5.77919	648.553
C. elegans_25	C. elegans	1	TRUE	23.8289	202.73	17.3042	11.2641	7281.54
C. elegans_25	C. elegans	1	TRUE	20.0825	192.255	12.3973	10.4392	6549.13
C. elegans_25	C. elegans	1	FALSE	3.05233	61.6705	10.4233	6.19322	1402.51
C. elegans_25	C. elegans	1	FALSE	33.7751	201.656	13.1241	13.38	8660.6
C. elegans_25	C. elegans	1	TRUE	23.9103	182.281	15.357	11.8287	7063.2
C. elegans_25	C. elegans	1	FALSE	2.54941	47.7181	10.2954	6.47583	1192.21
C. elegans_25	C. elegans	1	TRUE	24.7793	188.523	16.0324	11.9545	7299.2
C. elegans_25	C. elegans	1	TRUE	32.3815	191.754	19.8704	13.5232	8415.03
C. elegans_25	C. elegans	1	TRUE	46.6995	182.791	20.3968	16.8227	9874.87
C. elegans_25	C. elegans	1	TRUE	25.7561	210.243	11.5106	11.8838	7848.89
C. elegans_25	C. elegans	1	TRUE	27.7198	209.068	16.3596	12.2654	8099.16
C. elegans_25	C. elegans	1	TRUE	30.2938	187.675	12.3973	12.7685	7818.06
C. elegans_25	C. elegans	1	TRUE	26.906	178.379	15.008	12.494	7436.86
C. elegans_25	C. elegans	1	TRUE	29.7936	188.349	15.008	12.4769	7660.51
C. elegans_25	C. elegans	1	FALSE	28.696	181.582	14.5599	12.9531	7464.22
C. elegans_25	C. elegans	1	FALSE	24.4368	171.199	16.0324	12.4615	6911.02
C. elegans_25	C. elegans	1	FALSE	7.44483	72.1118	13.1241	9.74086	2481.04
C. elegans_25	C. elegans	1	FALSE	0.397968	26.0215	6.90636	3.01351	322.489
C. elegans_25	C. elegans	1	FALSE	13.3557	164.851	11.5106	9.00997	4871.75
C. elegans_25	C. elegans	1	TRUE	15.9318	190.988	11.5106	9.2977	5739.19
C. elegans_25	C. elegans	1	FALSE	12.8869	164.129	8.13922	9.02239	4899.97
C. elegans_25	C. elegans	1	TRUE	28.7943	193.488	17.6078	12.6592	8014.37
C. elegans_25	C. elegans	1	TRUE	35.7812	233.312	13.4235	13.0947	9480.25
C. elegans_25	C. elegans	1	FALSE	115.243	427.219	8.30041	17.1529	23434.8
C. elegans_25	C. elegans	1	FALSE	2.45499	77.4722	8.76621	5.32805	1402.74
C. elegans_25	C. elegans	1	FALSE	17.5193	144.792	13.9083	11.4839	5335.92
C. elegans_25	C. elegans	1	TRUE	29.6776	200.279	13.1241	12.6651	8112.42
C. elegans_25	C. elegans	1	FALSE	1.02215	37.975	6.51138	4.34092	654.189
C. elegans_25	C. elegans	1	TRUE	28.2461	215.16	17.3042	11.73	8097.22
C. elegans_25	C. elegans	1	TRUE	38.709	190.988	20.1353	14.5116	9096.07
C. elegans_25	C. elegans	1	TRUE	34.1064	205.326	22.8479	13.3579	8764.08
C. elegans_25	C. elegans	1	TRUE	32.4428	206.429	20.5908	13.2619	8523.83
C. elegans_25	C. elegans	1	TRUE	30.7809	191.942	19.8704	13.3955	8218.65
C. elegans_25	C. elegans	1	FALSE	100.379	253.241	24.1996	19.4817	15623.2
C. elegans_25	C. elegans	1	TRUE	38.2875	191.976	23.136	14.6579	9005.98
C. elegans_25	C. elegans	1	TRUE	27.2223	208.813	11.7385	11.874	7889.33
C. elegans_25	C. elegans	1	TRUE	42.0977	206.092	17.6078	15.0391	9865.74
C. elegans_25	C. elegans	1	TRUE	29.6025	206.477	13.0228	12.4241	8292.3
C. elegans_25	C. elegans	1	FALSE	10.4734	160.362	13.1241	8.31464	4315.04
C. elegans_25	C. elegans	1	FALSE	15.7394	153.654	19.5341	10.3165	5087.16
C. elegans_25	C. elegans	1	FALSE	3.76158	73.2051	9.76706	7.05016	1748.32
C. elegans_25	C. elegans	1	FALSE	12.6881	133.272	14.6506	10.1538	4353.96
C. elegans_25	C. elegans	1	FALSE	29.5343	184.303	21.2245	12.8178	7693.31
C. elegans_25	C. elegans	1	TRUE	22.5377	189.871	13.1241	11.4106	6902.04
C. elegans_25	C. elegans	1	TRUE	25.5707	190.011	16.7597	11.995	7172.57
C. elegans_25	C. elegans	1	TRUE	17.0996	178.023	11.8509	10.1137	5686.85
C. elegans_25	C. elegans	1	FALSE	2.46871	46.5671	9.20848	6.13534	1136.95
C. elegans_25	C. elegans	1	FALSE	2.67739	34.4401	8.13922	7.25426	1015.04
C. elegans_25	C. elegans	1	FALSE	4.96692	55.5202	10.2954	8.14925	1792.86
C. elegans_25	C. elegans	1	FALSE	10.5328	95.1809	14.6506	10.2383	3324.7
C. elegans_25	C. elegans	1	TRUE	36.9213	198.256	18.5603	14.3226	9210.45
C. elegans_25	C. elegans	1	FALSE	9.9696	72.7861	21.162	11.3323	2823.16
C. elegans_25	C. elegans	1	FALSE	1.18654	53.8106	6.71177	4.24082	800.076
C. elegans_25	C. elegans	1	TRUE	29.9127	180.465	16.2784	13.7199	7940.33
C. elegans_25	C. elegans	1	TRUE	23.579	179.478	16.3596	11.7677	6892.21
C. elegans_25	C. elegans	1	TRUE	18.5973	195.872	13.1241	10.4032	6360.63
C. elegans_25	C. elegans	1	TRUE	26.382	178.384	17.6078	12.4576	7215.63
C. elegans_25	C. elegans	1	FALSE	23.1869	158.036	16.2784	12.437	6432.5
C. elegans_25	C. elegans	1	FALSE	14.4139	154.805	13.1241	9.98737	4903.51
C. elegans_25	C. elegans	1	TRUE	27.4201	173.978	18.5603	13.2131	7403.22
C. elegans_25	C. elegans	1	FALSE	25.8132	194.779	17.3042	12.1211	7482.88
C. elegans_25	C. elegans	1	FALSE	0.255105	25.7662	4.88353	2.44177	256.164
C. elegans_25	C. elegans	1	FALSE	24.0677	178.163	18.5603	11.9003	6858.54
C. elegans_25	C. elegans	1	FALSE	19.6552	179.536	11.7385	10.7768	6315.33
C. elegans_25	C. elegans	1	TRUE	17.7677	194.302	11.8509	9.72163	6047.29
C. elegans_25	C. elegans	1	TRUE	24.3171	203.255	16.7597	11.3873	7386.52
C. elegans_25	C. elegans	1	TRUE	22.7072	188.128	16.6008	11.4298	6823.94
C. elegans_25	C. elegans	1	FALSE	9.83689	111.354	14.6506	9.58719	3481.11
C. elegans_25	C. elegans	1	FALSE	6.52873	104.168	10.2954	7.88565	2813.62
C. elegans_25	C. elegans	1	FALSE	0.598486	44.241	4.88353	3.10212	519.961
C. elegans_25	C. elegans	1	FALSE	4.06966	58.8916	6.71177	6.73081	1603.21
C. elegans_25	C. elegans	1	FALSE	9.7361	69.2172	26.0455	10.0324	2732.42
C. elegans_25	C. elegans	1	FALSE	8.98505	139.34	12.3973	8.18275	3627
C. elegans_25	C. elegans	1	FALSE	1.31544	59.0891	6.51138	4.06363	900.193
C. elegans_25	C. elegans	1	FALSE	0.472522	22.7659	5.86927	3.2873	344.085
C. elegans_25	C. elegans	1	FALSE	8.17458	108.411	11.8509	8.74202	3129.23
C. elegans_25	C. elegans	1	FALSE	10.2043	102.901	8.30041	9.60603	3430.45
C. elegans_25	C. elegans	1	TRUE	31.3041	189.408	20.1353	13.4197	8224.63
C. elegans_25	C. elegans	1	FALSE	16.2994	129.631	17.9063	11.26	4810.21
C. elegans_25	C. elegans	1	FALSE	16.9226	176.304	13.0228	10.3302	5812.23
C. elegans_25	C. elegans	1	FALSE	5.52737	46.4853	15.357	9.80554	1735.47
C. elegans_25	C. elegans	1	TRUE	32.8487	189.987	16.7597	13.744	8477.86
C. elegans_25	C. elegans	1	TRUE	41.5315	204.661	18.5603	15.0895	9758.68
C. elegans_25	C. elegans	1	FALSE	13.3602	199.917	9.76706	8.81173	5436.36
C. elegans_25	C. elegans	1	TRUE	29.0083	182.372	21.162	12.9298	7579.42
C. elegans_25	C. elegans	1	FALSE	17.7085	185.512	16.3596	9.83875	5896.9
C. elegans_25	C. elegans	1	FALSE	1.3866	47.776	7.27994	4.93424	830.962
C. elegans_25	C. elegans	1	TRUE	18.0729	189.895	13.4235	10.0232	6124.49
C. elegans_25	C. elegans	1	FALSE	15.1143	177.932	11.3949	9.68726	5434.92
C. elegans_25	C. elegans	1	TRUE	22.743	190.593	16.3596	11.0295	6843.15
C. elegans_25	C. elegans	1	TRUE	29.9368	186.057	19.6018	12.995	7820.87
C. elegans_25	C. elegans	1	TRUE	31.2337	199.522	16.0324	12.7679	8215.55
C. elegans_25	C. elegans	1	TRUE	34.139	173.583	17.6078	14.9368	8251.29
C. elegans_25	C. elegans	1	FALSE	10.9486	169.118	11.8509	8.50485	4563.08
C. elegans_25	C. elegans	1	TRUE	32.0613	199.373	17.9801	13.1233	8492.24
C. elegans_25	C. elegans	1	FALSE	36.7666	178.606	26.8471	14.9414	8601.88
C. elegans_25	C. elegans	1	TRUE	41.5871	211.312	23.3072	14.5363	9773.12
C. elegans_25	C. elegans	1	TRUE	15.6684	180.094	8.13922	9.92038	5608.45
C. elegans_25	C. elegans	1	TRUE	28.5971	205.581	13.1241	12.1064	8160.45
C. elegans_25	C. elegans	1	FALSE	9.78503	90.1917	12.7139	10.2362	3244.11
C. elegans_25	C. elegans	1	TRUE	29.6482	223.767	16.2784	11.8952	8664.77
C. elegans_25	C. elegans	1	FALSE	12.4822	72.5068	13.0228	11.8001	3171.75
C. elegans_25	C. elegans	1	TRUE	35.3045	190.059	18.1998	14.4939	8691.81
C. elegans_25	C. elegans	1	FALSE	0.820875	23.4641	9.76706	4.47657	472.891
C. elegans_25	C. elegans	1	TRUE	25.4272	223.15	13.1241	11.4305	7968.66
C. elegans_25	C. elegans	1	FALSE	21.0717	193.767	14.7408	10.936	6600.69
C. elegans_25	C. elegans	1	FALSE	23.7095	192.51	10.4233	11.2912	6914.21
C. elegans_25	C. elegans	1	FALSE	11.0597	58.1016	19.5341	12.8795	2765.68
C. elegans_25	C. elegans	1	TRUE	18.9243	207.382	11.8509	10.3085	6666.74
C. elegans_25	C. elegans	1	FALSE	8.90644	76.9954	17.9801	10.1989	2772.81
C. elegans_25	C. elegans	1	TRUE	35.5943	198.453	16.6008	13.9393	8903.97
C. elegans_25	C. elegans	1	TRUE	31.1964	208.196	18.1998	12.661	8501.71
C. elegans_25	C. elegans	1	TRUE	32.8945	217.742	19.0534	12.9749	8738.93
C. elegans_25	C. elegans	1	FALSE	15.8235	151.12	11.7385	10.6122	5286.86
C. elegans_25	C. elegans	1	FALSE	1.09866	35.254	6.71177	4.75568	638.045
C. elegans_25	C. elegans	1	TRUE	19.4882	206.684	11.7385	9.99058	6597.06
C. elegans_25	C. elegans	1	FALSE	14.7734	145.433	10.9199	10.4071	5019.23
C. elegans_25	C. elegans	1	FALSE	24.0108	200.963	15.357	11.229	7375.68
C. elegans_25	C. elegans	1	FALSE	20.2471	185.291	14.0032	10.6402	6354.14
C. elegans_25	C. elegans	1	FALSE	13.1298	177.513	10.2954	8.85923	5055.19
C. elegans_25	C. elegans	1	FALSE	14.0958	82.4953	16.7597	11.8893	3570.58
C. elegans_25	C. elegans	1	FALSE	0.0781847	14.0342	0	1.62784	103.674
C. elegans_25	C. elegans	1	TRUE	19.9767	188.104	13.8127	10.5763	6475.75
C. elegans_25	C. elegans	1	FALSE	3.53682	61.1359	10.2954	7.11871	1519.54
C. elegans_25	C. elegans	1	FALSE	1.96699	45.6953	8.13922	5.69	1006.38
C. elegans_25	C. elegans	1	FALSE	19.6248	186.861	15.008	10.3259	6325.76
C. elegans_25	C. elegans	1	FALSE	11.316	135.853	11.8509	9.31484	4183.25
C. elegans_25	C. elegans	1	FALSE	0.449104	20.8587	0	3.06949	321.669
C. elegans_25	C. elegans	1	FALSE	6.13766	49.4038	13.1241	9.7414	1931.36
C. elegans_25	C. elegans	1	FALSE	9.26116	91.9591	14.0032	9.88308	3125.43
C. elegans_25	C. elegans	1	FALSE	30.168	172.803	27.6733	13.5926	7533.48
C. elegans_25	C. elegans	1	FALSE	13.3333	156.548	13.1241	9.32214	4824.69
C. elegans_25	C. elegans	1	TRUE	27.6594	200.312	12.7139	12.1856	7851.34
C. elegans_25	C. elegans	1	FALSE	27.3799	198.116	15.008	12.5014	7871.06
C. elegans_25	C. elegans	1	FALSE	0.209271	16.057	0	2.42665	193.092
C. elegans_25	C. elegans	1	FALSE	0.0774628	15.0456	0	1.53475	106.527
C. elegans_25	C. elegans	1	FALSE	10.7707	173.65	13.9083	8.00958	4439.07
C. elegans_25	C. elegans	1	FALSE	11.3006	157.025	11.8509	8.90506	4505.1
C. elegans_25	C. elegans	1	FALSE	2.16202	48.6139	8.30041	5.94997	1082.3
C. elegans_25	C. elegans	1	FALSE	14.0917	168.757	11.3949	9.80897	5198.84
C. elegans_25	C. elegans	1	FALSE	9.521	135.318	6.71177	8.53763	3805.8
C. elegans_25	C. elegans	1	FALSE	0.358773	24.0566	5.86927	2.93464	298.421
C. elegans_25	C. elegans	1	TRUE	17.8721	177.455	15.357	10.3512	5905.71
C. elegans_25	C. elegans	1	TRUE	39.9171	208.047	18.417	14.234	9630.01
C. elegans_25	C. elegans	1	TRUE	20.794	190.757	13.9083	10.9104	6678.33
C. elegans_25	C. elegans	1	TRUE	22.349	176.559	16.2784	11.8356	6556.49
C. elegans_25	C. elegans	1	FALSE	31.6974	262.512	10.4233	11.0035	9328.04
C. elegans_25	C. elegans	1	FALSE	45.2994	157.199	19.6018	16.9277	8890.59
C. elegans_25	C. elegans	1	FALSE	12.203	160.025	10.4233	8.80247	4656.62
C. elegans_25	C. elegans	1	FALSE	16.2739	166.291	9.49188	9.8529	5439.37
C. elegans_25	C. elegans	1	FALSE	8.92762	73.455	9.90179	8.54589	2632.24
C. elegans_25	C. elegans	1	FALSE	0.732727	26.0215	6.90636	3.91814	454.185
C. elegans_25	C. elegans	1	FALSE	4.64031	83.3431	10.4233	7.21825	2085.21
C. elegans_25	C. elegans	1	FALSE	5.26436	68.6008	11.5106	8.25577	1992.98
C. elegans_25	C. elegans	1	FALSE	13.5433	160.955	13.1241	9.34038	4829.01
C. elegans_25	C. elegans	1	FALSE	15.3027	153.851	13.1241	10.3161	5213.54
C. elegans_25	C. elegans	1	FALSE	4.70002	59.5898	13.1241	8.30502	1762.73
C. elegans_25	C. elegans	1	FALSE	22.2833	108.011	10.4233	12.7198	5218.83
C. elegans_25	C. elegans	1	FALSE	0.895906	34.1608	5.86927	4.28992	565.601
C. elegans_25	C. elegans	1	FALSE	22.7362	173.198	16.9952	11.8668	6521.75
C. elegans_25	C. elegans	1	FALSE	0.50368	18.1038	6.51138	3.70295	340.368
C. elegans_25	C. elegans	1	FALSE	5.28792	65.6005	11.5106	8.33406	1970.38
C. elegans_25	C. elegans	1	FALSE	26.2468	170.163	16.1148	12.871	6962.65
C. elegans_25	C. elegans	1	FALSE	29.5571	169.292	14.5599	14.0334	7423.85
C. elegans_25	C. elegans	1	TRUE	22.8798	177.652	13.0228	11.5762	6711.14
C. elegans_25	C. elegans	1	FALSE	0.394709	23.7773	4.60424	2.87765	316.442
C. elegans_25	C. elegans	1	FALSE	0.32399	21.557	6.71177	2.89883	276.052
C. elegans_25	C. elegans	1	FALSE	7.24777	94.9116	10.4233	8.3488	2831.47
C. elegans_25	C. elegans	1	FALSE	2.58979	60.3558	8.13922	6.14002	1329.05
C. elegans_25	C. elegans	1	FALSE	13.9862	168.198	12.3973	9.56934	5205.14
C. elegans_25	C. elegans	1	TRUE	17.3674	189.674	12.3973	9.928	5979.62
C. elegans_25	C. elegans	1	FALSE	29.4401	240.758	14.5599	11.754	8730
C. elegans_25	C. elegans	1	FALSE	16.6519	159.245	9.49188	10.5275	5442.87
C. elegans_25	C. elegans	1	FALSE	0.807261	28.184	9.20848	4.1221	488.357
C. elegans_25	C. elegans	1	FALSE	11.9579	155.06	11.3949	8.94007	4501.71
C. elegans_25	C. elegans	1	TRUE	30.3833	196.652	17.9801	12.9393	8095.58
C. elegans_25	C. elegans	1	TRUE	40.2112	178.582	21.8398	15.9746	8970.03
C. elegans_25	C. elegans	1	TRUE	28.3782	204.185	13.9083	12.4814	8070.02
C. elegans_25	C. elegans	1	TRUE	20.7176	202.71	14.7408	10.8819	6905.98
C. elegans_25	C. elegans	1	TRUE	22.2412	206.568	13.0228	11.0753	7128.55
C. elegans_25	C. elegans	1	TRUE	21.2727	191.802	13.4235	11.3297	6810.18
C. elegans_25	C. elegans	1	FALSE	2.0791	60.7169	8.30041	5.51859	1199.63
C. elegans_25	C. elegans	1	FALSE	63.7616	366.011	13.9083	13.7316	15772.6
C. elegans_25	C. elegans	1	FALSE	61.0435	275.337	22.1411	15.7995	13905
C. elegans_25	C. elegans	1	FALSE	13.7782	169.431	11.7385	9.35026	4983.58
C. elegans_25	C. elegans	1	FALSE	21.1876	187.256	14.5599	10.8792	6440.44
C. elegans_25	C. elegans	1	TRUE	24.1396	204.464	11.5106	11.55	7515.07
C. elegans_25	C. elegans	1	FALSE	7.74052	162.467	5.86927	6.98452	3678.39
C. elegans_25	C. elegans	1	FALSE	12.0889	51.2531	17.9801	14.3447	2980.57
C. elegans_25	C. elegans	1	TRUE	15.0195	196.127	11.8509	9.34823	5739.08
C. elegans_25	C. elegans	1	FALSE	2.06044	54.6485	8.30041	5.55442	1139.77
C. elegans_25	C. elegans	1	FALSE	67.8077	125.825	27.6733	21.3812	10337.1
C. elegans_25	C. elegans	1	FALSE	0.186527	21.8941	3.63997	2.13088	203.715
C. elegans_25	C. elegans	1	TRUE	18.944	206.626	12.3973	10.0545	6545.98
C. elegans_25	C. elegans	1	FALSE	5.5582	100.209	6.71177	7.30186	2476.1
C. elegans_25	C. elegans	1	FALSE	5.68875	114.97	11.3949	7.10892	2692.08
C. elegans_25	C. elegans	1	FALSE	4.90971	74.4478	9.49188	7.65539	2068.46
C. elegans_25	C. elegans	1	FALSE	34.1538	280.901	13.9083	11.8123	10334.5
C. elegans_25	C. elegans	1	FALSE	9.50829	116.435	14.7408	8.9407	3443.01
C. elegans_25	C. elegans	1	FALSE	14.7857	164.885	12.3973	9.68804	5155.92
C. elegans_25	C. elegans	1	FALSE	21.5886	84.4364	34.4934	14.036	4717.48
C. elegans_25	C. elegans	1	FALSE	1.02517	36.5207	5.86927	4.38308	628.648
C. elegans_25	C. elegans	1	TRUE	26.275	192.814	13.0228	12.4856	7648.31
C. elegans_25	C. elegans	1	TRUE	27.1272	205.08	14.5599	12.1788	7845.93
C. elegans_25	C. elegans	1	FALSE	0.608124	23.8591	8.76621	3.86949	395.023
C. elegans_25	C. elegans	1	FALSE	2.67391	44.9392	11.8509	6.82369	1149.79
C. elegans_25	C. elegans	1	TRUE	33.793	198.882	18.417	13.7266	8769.98
C. elegans_25	C. elegans	1	TRUE	25.0876	198.266	15.4431	11.7907	7498.59
C. elegans_25	C. elegans	1	FALSE	23.853	170.072	16.0324	12.4216	6692.85
C. elegans_25	C. elegans	1	FALSE	0.00914617	13.697	0	0.542615	33.9855
C. elegans_25	C. elegans	1	FALSE	46.3207	191.913	33.8732	14.8448	9805.01
C. elegans_25	C. elegans	1	FALSE	0.103847	16.5338	0	1.7159	128.29
C. elegans_25	C. elegans	1	FALSE	29.5058	195.371	16.0324	12.9826	8033.67
C. elegans_25	C. elegans	1	FALSE	1.08785	20.6852	11.5106	5.3531	552.074
C. elegans_25	C. elegans	1	TRUE	31.3928	197.755	18.5603	13.0308	8240.03
C. elegans_25	C. elegans	1	FALSE	12.8173	121.54	9.90179	10.4909	4196.32
C. elegans_25	C. elegans	1	TRUE	37.5617	205.942	19.6018	13.8069	9036.5
C. elegans_25	C. elegans	1	FALSE	32.7491	171.955	21.8398	14.3524	7939.31
C. elegans_25	C. elegans	1	FALSE	341.675	198.342	62.8356	37.9453	35413.9
C. elegans_25	C. elegans	1	FALSE	26.6264	198.709	6.51138	11.8797	7828.57
C. elegans_25	C. elegans	1	TRUE	24.7319	197.581	13.9083	11.6028	7274.62
C. elegans_25	C. elegans	1	TRUE	30.9307	190.454	20.3968	12.7411	7909.7
C. elegans_25	C. elegans	1	TRUE	20.033	202.176	16.6008	10.4428	6796.07
C. elegans_25	C. elegans	1	FALSE	0.980644	31.3819	7.27994	4.57206	592.174
C. elegans_25	C. elegans	1	FALSE	33.9916	186.081	19.0534	14.2079	8495.32
C. elegans_25	C. elegans	1	TRUE	28.0497	186.418	17.3042	12.8323	7727.17
C. elegans_25	C. elegans	1	FALSE	15.4876	118.457	17.3042	11.1657	4439.6
C. elegans_25	C. elegans	1	TRUE	31.6527	200.534	16.7597	13.181	8487.38
C. elegans_25	C. elegans	1	TRUE	21.9036	197.476	16.3596	11.2362	7014.58
C. elegans_25	C. elegans	1	FALSE	25.3163	179.651	14.6506	12.5631	7102.23
C. elegans_25	C. elegans	1	FALSE	8.93594	165.222	10.2954	7.65765	4065.51
C. elegans_25	C. elegans	1	TRUE	50.7567	222.789	19.0534	15.3322	11174.8
C. elegans_25	C. elegans	1	FALSE	0.699466	22.9055	3.25569	3.74856	419.524
C. elegans_25	C. elegans	1	FALSE	3.03936	47.2414	11.7385	6.79601	1311.27
C. elegans_25	C. elegans	1	FALSE	67.2487	319.887	16.9952	15.493	15333.6
C. elegans_25	C. elegans	1	FALSE	0.163069	15.662	0	2.17046	164.506
C. elegans_25	C. elegans	1	TRUE	29.3782	186.582	17.9801	13.0076	7836.33
C. elegans_25	C. elegans	1	TRUE	49.6059	220.102	24.848	15.6913	10750.6
C. elegans_25	C. elegans	1	FALSE	10.7389	87.4127	13.8127	10.8663	3281.44
C. elegans_25	C. elegans	1	TRUE	18.1309	197.476	12.3973	10.2933	6391.15
C. elegans_25	C. elegans	1	TRUE	39.6834	201.858	18.9838	14.8068	9390.24
C. elegans_25	C. elegans	1	FALSE	8.34607	145.375	8.13922	7.82174	3671.49
C. elegans_25	C. elegans	1	FALSE	25.2307	180.768	11.8509	12.1347	7098.84
C. elegans_25	C. elegans	1	FALSE	36.5747	188.884	18.5603	14.5114	8909.22
C. elegans_25	C. elegans	1	TRUE	33.9053	205.056	16.2784	13.1845	8605.37
C. elegans_25	C. elegans	1	TRUE	28.2939	206.01	13.1241	12.3496	8122.79
C. elegans_25	C. elegans	1	TRUE	25.1988	193.382	15.008	11.8551	7277.71
C. elegans_25	C. elegans	1	TRUE	43.3265	198.79	19.6693	15.2169	9539.38
C. elegans_12.5	C. elegans	1	FALSE	4.07979	90.6346	6.71177	6.74197	2120.17
C. elegans_12.5	C. elegans	1	TRUE	26.08	217.834	16.0324	11.6995	7972.61
C. elegans_12.5	C. elegans	1	FALSE	2.35537	74.2404	5.14769	5.33812	1370.6
C. elegans_12.5	C. elegans	1	TRUE	23.1858	211.149	16.2784	10.9373	7367.5
C. elegans_12.5	C. elegans	1	TRUE	27.1871	199.884	16.9952	12.2237	7685.04
C. elegans_12.5	C. elegans	1	FALSE	817.548	154.015	115.772	77.6194	55327.3
C. elegans_12.5	C. elegans	1	FALSE	0.0400844	12.0692	0	1.21332	69.9123
C. elegans_12.5	C. elegans	1	FALSE	34.8115	175.909	16.3596	14.3329	8341.18
C. elegans_12.5	C. elegans	1	TRUE	24.4173	184.732	16.2784	11.8426	7066.55
C. elegans_12.5	C. elegans	1	TRUE	19.7231	209.838	9.90179	10.2351	6772.64
C. elegans_12.5	C. elegans	1	FALSE	10.917	161.514	11.5106	8.49313	4441.65
C. elegans_12.5	C. elegans	1	FALSE	1.15024	37.0215	6.51138	4.63909	692.332
C. elegans_12.5	C. elegans	1	TRUE	33.4204	198.232	23.0212	13.4106	8276.06
C. elegans_12.5	C. elegans	1	TRUE	21.9343	199.185	14.5599	10.9893	7005.85
C. elegans_12.5	C. elegans	1	TRUE	23.5089	213.812	16.6008	10.9814	7397.51
C. elegans_12.5	C. elegans	1	FALSE	18.2978	152.421	17.3042	11.1086	5573.85
C. elegans_12.5	C. elegans	1	FALSE	18.882	178.245	15.008	10.9581	6108.15
C. elegans_12.5	C. elegans	1	FALSE	17.796	191.012	15.357	10.1599	6110.96
C. elegans_12.5	C. elegans	1	TRUE	35.6873	216.302	16.2784	13.5728	9234.68
C. elegans_12.5	C. elegans	1	TRUE	31.338	192.905	16.1148	12.9915	8082.23
C. elegans_12.5	C. elegans	1	TRUE	25.0007	215.184	11.8509	11.5726	7708.53
C. elegans_12.5	C. elegans	1	FALSE	1.83126	20.9405	11.8509	6.71472	763.217
C. elegans_12.5	C. elegans	1	FALSE	29.0376	183.489	16.9952	13.0118	7811.22
C. elegans_12.5	C. elegans	1	FALSE	15.0572	165.689	14.7408	9.8088	5184.41
C. elegans_12.5	C. elegans	1	FALSE	24.6358	170.525	14.5599	12.1851	6830.86
C. elegans_12.5	C. elegans	1	TRUE	36.7755	209.661	16.3596	13.7515	9226.7
C. elegans_12.5	C. elegans	1	FALSE	13.5079	151.188	13.1241	9.87293	4800.15
C. elegans_12.5	C. elegans	1	TRUE	46.913	217.987	20.5908	15.4128	10542.2
C. elegans_12.5	C. elegans	1	FALSE	8.22162	124.656	10.9199	8.3747	3380.19
C. elegans_12.5	C. elegans	1	FALSE	0.0895202	15.3249	0	1.62784	116.292
C. elegans_12.5	C. elegans	1	FALSE	11.5098	123.538	12.3973	10.0064	4004.14
C. elegans_12.5	C. elegans	1	TRUE	29.8038	212.916	13.1241	12.4219	8531.93
C. elegans_12.5	C. elegans	1	TRUE	39.2939	228.51	20.8466	13.4803	10037.4
C. elegans_12.5	C. elegans	1	TRUE	30.8486	207.975	18.5603	12.7864	8429.98
C. elegans_12.5	C. elegans	1	TRUE	41.1277	211.929	13.9083	14.4957	9816.18
C. elegans_12.5	C. elegans	1	TRUE	38.6683	208.428	15.008	14.1006	9442.58
C. elegans_12.5	C. elegans	1	TRUE	25.69	206.954	10.9199	12.1517	7869.04
C. elegans_12.5	C. elegans	1	FALSE	0.0897756	18.3013	0	1.53475	121.648
C. elegans_12.5	C. elegans	1	TRUE	21.867	220.916	16.3596	10.5726	7213.25
C. elegans_12.5	C. elegans	1	TRUE	29.0802	204.661	16.0324	12.4819	8169.55
C. elegans_12.5	C. elegans	1	FALSE	30.2745	179.873	19.8704	13.0204	7699.65
C. elegans_12.5	C. elegans	1	FALSE	12.6489	123.678	16.1148	10.4878	4120.11
C. elegans_12.5	C. elegans	1	TRUE	16.0498	199.209	10.2954	9.69266	6040.09
C. elegans_12.5	C. elegans	1	FALSE	4.80061	81.2625	10.9199	7.52749	2094.96
C. elegans_12.5	C. elegans	1	FALSE	0.170221	20.8827	3.25569	2.0348	190.197
C. elegans_12.5	C. elegans	1	FALSE	1.32195	44.5781	7.27994	4.38984	788.258
C. elegans_12.5	C. elegans	1	FALSE	4.18997	70.6815	11.8509	7.10517	1794.43
C. elegans_12.5	C. elegans	1	FALSE	0.387611	28.2419	3.63997	2.63658	331.68
C. elegans_12.5	C. elegans	1	FALSE	0.616056	37.3346	5.14769	3.37725	487.048
C. elegans_12.5	C. elegans	1	FALSE	13.8947	147.003	13.4235	9.94106	4741.4
C. elegans_12.5	C. elegans	1	FALSE	3.24322	86.7385	8.13922	6.24611	1756.7
C. elegans_12.5	C. elegans	1	FALSE	6.71787	67.368	14.5599	9.13635	2264.84
C. elegans_12.5	C. elegans	1	FALSE	82.3997	277.972	15.008	16.8297	19098.1
C. elegans_12.5	C. elegans	1	FALSE	37.2969	160.049	22.1411	15.2765	9109.79
C. elegans_12.5	C. elegans	1	FALSE	0.482302	24.7887	5.86927	3.19391	362.472
C. elegans_12.5	C. elegans	1	FALSE	44.2409	353.171	11.8509	12.1989	13277.2
C. elegans_12.5	C. elegans	1	FALSE	65.4943	179.019	21.7181	18.3156	16548.3
C. elegans_12.5	C. elegans	1	TRUE	40.1624	218.334	14.5599	14.0901	9735.24
C. elegans_12.5	C. elegans	1	FALSE	5.53978	119.387	11.7385	6.71157	2694.37
C. elegans_12.5	C. elegans	1	FALSE	9.32443	167.606	8.30041	7.69607	4160.6
C. elegans_12.5	C. elegans	1	FALSE	11.3062	170.245	10.2954	8.29641	4645.34
C. elegans_12.5	C. elegans	1	FALSE	6.77684	83.4249	13.4235	8.82043	2480.04
C. elegans_12.5	C. elegans	1	FALSE	1.1588	44.241	8.13922	4.15473	729.619
C. elegans_12.5	C. elegans	1	FALSE	0.721239	28.6608	8.13922	3.85479	462.424
C. elegans_12.5	C. elegans	1	FALSE	17.2014	44.5781	25.7385	16.6518	3335.71
C. elegans_12.5	C. elegans	1	FALSE	4.63902	78.0646	8.76621	7.19556	2037.41
C. elegans_12.5	C. elegans	1	FALSE	3.1704	69.0536	7.27994	6.1094	1551.95
C. elegans_12.5	C. elegans	1	FALSE	0.118588	14.2317	0	1.95642	133.859
C. elegans_12.5	C. elegans	1	FALSE	5.11349	69.1933	12.7139	8.38232	2084.05
C. elegans_12.5	C. elegans	1	FALSE	4.78607	147.571	8.76621	5.99195	2792.35
C. elegans_12.5	C. elegans	1	FALSE	1.47994	42.9164	8.30041	4.99845	801.697
C. elegans_12.5	C. elegans	1	FALSE	3.04246	98.3069	6.51138	5.55301	1810.21
C. elegans_12.5	C. elegans	1	TRUE	20.5763	219.509	12.3973	10.3566	7133.85
C. elegans_12.5	C. elegans	1	TRUE	33.4372	217.66	18.1998	13.1029	8995.35
C. elegans_12.5	C. elegans	1	TRUE	31.7156	198.314	15.008	13.2152	8507.55
C. elegans_12.5	C. elegans	1	TRUE	32.0106	186.813	13.4235	13.0968	8051.65
C. elegans_12.5	C. elegans	1	TRUE	35.2843	217.997	15.008	13.2362	9031.2
C. elegans_12.5	C. elegans	1	FALSE	9.34495	143.073	13.1241	8.07912	3742.61
C. elegans_12.5	C. elegans	1	FALSE	13.639	129.747	17.3042	10.4763	4289.38
C. elegans_12.5	C. elegans	1	FALSE	16.6226	140.154	15.008	10.9181	5055.12
C. elegans_12.5	C. elegans	1	FALSE	7.9388	80.3329	13.4235	9.78373	2652.41
C. elegans_12.5	C. elegans	1	FALSE	0.849809	25.0919	8.13922	4.47657	485.975
C. elegans_12.5	C. elegans	1	FALSE	0.760785	27.2304	5.86927	3.76944	473.603
C. elegans_12.5	C. elegans	1	TRUE	39.7145	201.545	18.9838	14.19	9516.71
C. elegans_12.5	C. elegans	1	TRUE	22.4816	206.173	13.1241	10.9609	7156.11
C. elegans_12.5	C. elegans	1	FALSE	42.5706	197.418	18.5603	15.5234	10048.7
C. elegans_12.5	C. elegans	1	TRUE	30.387	200.929	18.1998	12.7496	8250
C. elegans_12.5	C. elegans	1	TRUE	52.2982	208.091	20.1353	16.6814	11127.1
C. elegans_12.5	C. elegans	1	FALSE	15.789	91.1692	14.5599	13.4942	4105.04
C. elegans_12.5	C. elegans	1	TRUE	31.601	222.847	16.6008	12.828	8798.52
C. elegans_12.5	C. elegans	1	FALSE	3.23279	31.3001	15.4431	8.30271	1204.19
C. elegans_12.5	C. elegans	1	TRUE	38.8796	228.544	13.1241	13.8087	9954.68
C. elegans_12.5	C. elegans	1	TRUE	37.8438	232.113	13.4235	13.7394	10103.5
C. elegans_12.5	C. elegans	1	FALSE	450.512	128.306	64.562	60.2117	58349.5
C. elegans_12.5	C. elegans	1	FALSE	27.4811	176.954	20.5908	13.2198	7400.45
C. elegans_12.5	C. elegans	1	FALSE	1.95568	61.3334	6.90636	5.00348	1109.07
C. elegans_12.5	C. elegans	1	FALSE	6.52536	31.7136	11.8509	11.9228	2386.2
C. elegans_12.5	C. elegans	1	FALSE	19.2242	153.235	15.008	11.4289	5713.78
C. elegans_12.5	C. elegans	1	TRUE	38.7383	211.197	15.4431	14.2865	9604.45
C. elegans_12.5	C. elegans	1	TRUE	40.364	188.546	19.8704	14.6551	9032.85
C. elegans_12.5	C. elegans	1	FALSE	42.465	175.163	16.3596	16.2017	9195.03
C. elegans_12.5	C. elegans	1	FALSE	0.406013	16.3363	0	3.3006	290.278
C. elegans_12.5	C. elegans	1	FALSE	18.8647	182.815	13.0228	10.5381	6273.59
C. elegans_12.5	C. elegans	1	TRUE	29.1101	215.555	17.3042	11.9292	8220.83
C. elegans_12.5	C. elegans	1	TRUE	37.7421	195.674	16.0324	14.2806	9075.04
C. elegans_12.5	C. elegans	1	FALSE	10.2124	66.4144	15.008	12.111	2857.48
C. elegans_12.5	C. elegans	1	TRUE	59.2891	206.732	21.9004	17.3332	11589.1
C. elegans_12.5	C. elegans	1	TRUE	48.6616	214.847	19.5341	15.6761	10758.3
C. elegans_12.5	C. elegans	1	FALSE	1.79896	44.6839	8.13922	5.17306	920.639
C. elegans_12.5	C. elegans	1	FALSE	44.8301	172.908	21.4109	17.0877	9326.04
C. elegans_12.5	C. elegans	1	FALSE	10.2861	106.668	16.7597	9.75359	3513.45
C. elegans_12.5	C. elegans	1	FALSE	0.696946	24.6151	8.30041	4.10991	431.27
C. elegans_12.5	C. elegans	1	FALSE	10.5528	79.6925	13.4235	10.9541	3110.93
C. elegans_12.5	C. elegans	1	TRUE	30.5753	205.942	15.008	12.9204	8448
C. elegans_12.5	C. elegans	1	TRUE	45.6705	196.768	14.0032	15.7069	10028.6
C. elegans_12.5	C. elegans	1	TRUE	32.7996	221.383	11.5106	12.6307	8925.69
C. elegans_12.5	C. elegans	1	FALSE	3.97399	67.6233	12.3973	7.1146	1647.23
C. elegans_12.5	C. elegans	1	FALSE	19.1909	65.798	24.4719	16.6396	4091.06
C. elegans_12.5	C. elegans	1	FALSE	0.645662	44.3468	6.51138	3.11577	551.58
C. elegans_12.5	C. elegans	1	FALSE	1.73244	40.5325	8.13922	5.56404	902.629
C. elegans_12.5	C. elegans	1	FALSE	22.6631	183.663	15.4431	11.357	6861.33
C. elegans_12.5	C. elegans	1	TRUE	23.7958	226.079	13.0228	11.0147	7783.03
C. elegans_12.5	C. elegans	1	FALSE	1.24627	45.1706	8.13922	4.29117	809.783
C. elegans_12.5	C. elegans	1	FALSE	25.5103	180.739	12.3973	11.9092	7340.88
C. elegans_12.5	C. elegans	1	FALSE	20.3238	170.582	13.0228	11.0973	6180.36
C. elegans_12.5	C. elegans	1	TRUE	18.7269	191.128	10.2954	10.2763	6268.77
C. elegans_12.5	C. elegans	1	FALSE	1.1665	35.4515	9.90179	4.95056	680.19
C. elegans_12.5	C. elegans	1	FALSE	0.951899	28.9401	4.60424	4.33417	555.577
C. elegans_12.5	C. elegans	1	FALSE	1.95113	89.262	4.88353	4.54603	1387.45
C. elegans_12.5	C. elegans	1	FALSE	1.35869	51.1474	8.76621	4.56852	840.477
C. elegans_12.5	C. elegans	1	FALSE	0.210122	24.4515	3.63997	2.06105	232.778
C. elegans_12.5	C. elegans	1	FALSE	1.49413	43.0321	8.30041	5.10155	833.793
C. elegans_12.5	C. elegans	1	FALSE	2.09706	47.776	10.2954	5.8946	1021.87
C. elegans_12.5	C. elegans	1	FALSE	6.36184	66.7755	13.1241	9.0634	2198.78
C. elegans_12.5	C. elegans	1	FALSE	231.014	188.175	24.4177	32.7573	25343.7
C. elegans_12.5	C. elegans	1	TRUE	25.0558	203.895	13.1241	11.3041	7300.96
C. elegans_12.5	C. elegans	1	TRUE	20.3757	212.324	13.1241	10.2332	6818.76
C. elegans_12.5	C. elegans	1	FALSE	3.60357	67.1126	8.30041	6.84704	1607.12
C. elegans_12.5	C. elegans	1	FALSE	1.18283	31.5215	5.14769	4.7487	631.48
C. elegans_12.5	C. elegans	1	FALSE	15.293	170.024	11.5106	9.89444	5395.2
C. elegans_12.5	C. elegans	1	FALSE	21.0849	123.062	19.8036	12.8994	5351.09
C. elegans_12.5	C. elegans	1	TRUE	32.0948	216.302	10.9199	12.8368	8719.78
C. elegans_12.5	C. elegans	1	FALSE	13.0822	118.934	13.8127	10.187	4022.35
C. elegans_12.5	C. elegans	1	FALSE	3.05238	72.9497	8.76621	6.06975	1586.83
C. elegans_12.5	C. elegans	1	FALSE	11.9329	82.8085	15.008	11.8831	3435.73
C. elegans_12.5	C. elegans	1	TRUE	38.4253	204.849	20.5908	14.2373	9395.83
C. elegans_12.5	C. elegans	1	FALSE	21.5471	149.56	13.9083	12.5329	6012
C. elegans_12.5	C. elegans	1	TRUE	23.8767	218.941	12.7139	10.9524	7500.64
C. elegans_12.5	C. elegans	1	TRUE	34.4991	213.696	20.5908	13.6595	9114.47
C. elegans_12.5	C. elegans	1	TRUE	31.7017	201.208	16.0324	13.2416	8633.37
C. elegans_12.5	C. elegans	1	TRUE	36.4344	207.522	19.6693	13.5704	9123.45
C. elegans_12.5	C. elegans	1	TRUE	24.3688	192.905	13.8127	11.9996	7327.88
C. elegans_12.5	C. elegans	1	TRUE	28.309	202.393	16.1148	12.3052	8020.83
C. elegans_12.5	C. elegans	1	FALSE	25.377	159.269	15.008	13.1251	6792.33
C. elegans_12.5	C. elegans	1	TRUE	34.9678	195.535	16.3596	13.9966	8631.1
C. elegans_12.5	C. elegans	1	TRUE	28.4591	204.998	18.1998	11.8384	7877.68
C. elegans_12.5	C. elegans	1	FALSE	0.109641	16.5338	0	1.7159	134.417
C. elegans_12.5	C. elegans	1	FALSE	22.0074	198.651	15.008	10.9625	7027.24
C. elegans_12.5	C. elegans	1	TRUE	36.3739	216.393	13.9083	13.6455	9254.56
C. elegans_12.5	C. elegans	1	TRUE	34.7426	205.976	11.8509	13.0817	8861.97
C. elegans_12.5	C. elegans	1	TRUE	27.5748	188.999	14.6506	12.9648	7651.71
C. elegans_12.5	C. elegans	1	FALSE	11.0287	160.468	11.5106	8.427	4441.34
C. elegans_12.5	C. elegans	1	TRUE	22.4083	230.846	13.0228	10.5714	7564.39
C. elegans_12.5	C. elegans	1	FALSE	2.25651	44.0435	11.7385	6.16553	1040.86
C. elegans_12.5	C. elegans	1	FALSE	11.6367	125.667	11.5106	9.58991	3968.08
C. elegans_12.5	C. elegans	1	FALSE	15.0853	190.849	10.4233	9.30091	5643.34
C. elegans_12.5	C. elegans	1	FALSE	0.232458	21.6966	4.88353	2.44177	229.767
C. elegans_12.5	C. elegans	1	FALSE	1.77947	70.879	5.86927	4.69382	1185.12
C. elegans_12.5	C. elegans	1	FALSE	0.764926	38.0089	5.86927	3.65938	542.572
C. elegans_12.5	C. elegans	1	FALSE	10.1289	107.366	11.3949	9.73204	3519.09
C. elegans_12.5	C. elegans	1	FALSE	18.6996	198.732	11.5106	10.3305	6479.34
C. elegans_12.5	C. elegans	1	TRUE	24.4559	184.279	16.3596	12.1297	7043.09
C. elegans_12.5	C. elegans	1	FALSE	12.849	160.396	7.27994	9.31735	4834.33
C. elegans_12.5	C. elegans	1	FALSE	0.911219	35.23	5.14769	4.03865	576.654
C. elegans_12.5	C. elegans	1	FALSE	7.63355	73.5662	14.7408	9.4888	2476.88
C. elegans_12.5	C. elegans	1	TRUE	29.8382	210.219	18.5603	12.153	8424.48
C. elegans_12.5	C. elegans	1	FALSE	11.3316	155.734	10.2954	8.82398	4451.07
C. elegans_12.5	C. elegans	1	FALSE	12.4947	172.432	10.2954	8.91856	4906.74
C. elegans_12.5	C. elegans	1	FALSE	21.033	179.897	13.9083	11.3447	6429.05
C. elegans_12.5	C. elegans	1	TRUE	23.7129	207.161	11.3949	11.3506	7390.49
C. elegans_12.5	C. elegans	1	FALSE	6.90834	100.657	11.3949	8.43425	2778.97
C. elegans_12.5	C. elegans	1	FALSE	19.8537	191.325	13.1241	10.3871	6513.65
C. elegans_12.5	C. elegans	1	TRUE	21.5811	193.628	13.9083	11.1353	6886.1
C. elegans_12.5	C. elegans	1	FALSE	0.471055	26.7776	6.51138	3.30579	353.226
C. elegans_12.5	C. elegans	1	FALSE	0.047312	15.0456	0	1.21332	80.8198
C. elegans_12.5	C. elegans	1	FALSE	0.162106	19.173	0	1.95642	174.332
C. elegans_12.5	C. elegans	1	TRUE	28.4037	188.291	19.6018	12.4839	7609.43
C. elegans_12.5	C. elegans	1	FALSE	7.25489	79.2975	13.1241	9.10967	2500.86
C. elegans_12.5	C. elegans	1	FALSE	12.5646	160.281	10.4233	9.45837	4764.32
C. elegans_12.5	C. elegans	1	FALSE	9.53748	90.4709	15.357	9.93164	3114.82
C. elegans_12.5	C. elegans	1	FALSE	0.678569	23.3244	8.13922	4.10991	418.166
C. elegans_12.5	C. elegans	1	TRUE	22.1902	200.5	16.9952	11.1406	7058.5
C. elegans_12.5	C. elegans	1	FALSE	5.40794	87.0417	9.90179	7.87359	2293.3
C. elegans_12.5	C. elegans	1	FALSE	16.7916	178.606	13.1241	10.12	5751.86
C. elegans_12.5	C. elegans	1	TRUE	15.8337	207.44	11.5106	9.31337	6076.78
C. elegans_12.5	C. elegans	1	FALSE	16.6649	148.351	15.008	10.9589	5294.43
C. elegans_12.5	C. elegans	1	FALSE	30.7397	201.011	18.5603	12.3439	8127.22
C. elegans_12.5	C. elegans	1	TRUE	27.1223	206.766	17.3042	12.1835	7927.51
C. elegans_12.5	C. elegans	1	TRUE	31.5951	218.219	16.0324	12.6966	8530
C. elegans_12.5	C. elegans	1	TRUE	30.7996	193.127	15.008	13.2172	8251.61
C. elegans_12.5	C. elegans	1	TRUE	26.5975	220.511	13.1241	11.5521	8052.42
C. elegans_12.5	C. elegans	1	FALSE	3.13912	69.5304	6.90636	6.40579	1596.8
C. elegans_12.5	C. elegans	1	FALSE	12.6493	103.773	8.13922	9.37668	4339.42
C. elegans_12.5	C. elegans	1	FALSE	17.9678	162.722	13.1241	10.6554	5722.39
C. elegans_12.5	C. elegans	1	FALSE	0.85998	32.8701	5.14769	4.14561	538.748
C. elegans_12.5	C. elegans	1	FALSE	18.7294	184.698	11.7385	10.6206	6227.91
C. elegans_12.5	C. elegans	1	TRUE	26.6817	205.022	11.8509	12.0055	7796.16
C. elegans_12.5	C. elegans	1	FALSE	12.5833	134.399	8.76621	9.86294	4379.46
C. elegans_12.5	C. elegans	1	TRUE	25.0906	199.556	13.1241	11.7469	7503.48
C. elegans_12.5	C. elegans	1	TRUE	24.9324	206.766	17.6078	11.442	7537.65
C. elegans_12.5	C. elegans	1	FALSE	15.0385	189.384	13.4235	9.20561	5424.32
C. elegans_12.5	C. elegans	1	FALSE	7.64872	114.156	10.4233	8.22948	3039.45
C. elegans_12.5	C. elegans	1	FALSE	0.807005	41.5679	6.51138	3.84233	596.389
C. elegans_12.5	C. elegans	1	FALSE	3.31114	68.7405	7.27994	6.67316	1597.14
C. elegans_12.5	C. elegans	1	FALSE	9.05276	171.979	9.76706	7.33122	4074.68
C. elegans_12.5	C. elegans	1	TRUE	19.9118	222.847	14.6506	10.1601	6982.5
C. elegans_12.5	C. elegans	1	TRUE	32.5191	209.882	13.1241	12.8943	8762.25
C. elegans_12.5	C. elegans	1	TRUE	40.0676	215.998	15.4431	14.1716	9858.58
C. elegans_12.5	C. elegans	1	TRUE	27.2182	179.035	13.0228	12.6709	7307.47
C. elegans_12.5	C. elegans	1	TRUE	21.2551	237.613	13.0228	9.67874	7314.65
C. elegans_12.5	C. elegans	1	FALSE	10.9136	162.886	6.51138	8.60425	4448.95
C. elegans_12.5	C. elegans	1	FALSE	20.416	146.863	18.5603	11.8822	5720.97
C. elegans_12.5	C. elegans	1	FALSE	0.304795	17.4295	4.88353	2.84873	256.202
C. elegans_12.5	C. elegans	1	FALSE	19.6759	146.641	11.8509	11.487	5785.12
C. elegans_12.5	C. elegans	1	TRUE	29.4925	195.674	17.3042	12.6611	8097.2
C. elegans_12.5	C. elegans	1	TRUE	21.0027	196.127	13.9083	11.1696	6846.78
C. elegans_12.5	C. elegans	1	FALSE	6.32751	131.341	10.2954	7.31799	3062.66
C. elegans_12.5	C. elegans	1	FALSE	1.94336	52.067	8.13922	5.5135	1045.67
C. elegans_12.5	C. elegans	1	FALSE	11.1164	156.211	11.8509	8.63702	4382.28
C. elegans_12.5	C. elegans	1	FALSE	1.7744	50.4731	9.20848	5.22603	956.826
C. elegans_12.5	C. elegans	1	FALSE	2.69821	61.3573	9.90179	6.23249	1328.67
C. elegans_12.5	C. elegans	1	FALSE	0.566961	23.1848	6.71177	3.71275	377.017
C. elegans_12.5	C. elegans	1	TRUE	38.7164	230.264	13.9083	13.9369	9941.35
C. elegans_12.5	C. elegans	1	FALSE	0.186342	14.5688	0	2.42665	177.119
C. elegans_12.5	C. elegans	1	TRUE	56.2113	207.209	24.1996	17.15	11301.5
C. elegans_12.5	C. elegans	1	TRUE	29.4025	209.01	13.1241	12.0196	8036.75
C. elegans_12.5	C. elegans	1	FALSE	3.47693	46.5092	15.357	7.63245	1378.38
C. elegans_12.5	C. elegans	1	FALSE	19.8176	178.466	12.7139	10.7545	6217.4
C. elegans_12.5	C. elegans	1	FALSE	8.8972	140.573	8.30041	7.90954	3727.02
C. elegans_12.5	C. elegans	1	FALSE	11.4462	156.071	11.5106	8.78093	4516.92
C. elegans_12.5	C. elegans	1	FALSE	0.632231	44.7417	4.88353	3.38777	549.311
C. elegans_12.5	C. elegans	1	FALSE	1.24787	41.0093	6.71177	4.74338	741.565
C. elegans_12.5	C. elegans	1	FALSE	9.76052	189.837	9.76706	7.43861	4564.62
C. elegans_12.5	C. elegans	1	FALSE	8.97583	166.455	9.90179	7.522	3988.32
C. elegans_12.5	C. elegans	1	FALSE	1.19401	78.1225	4.88353	3.79024	982.866
C. elegans_12.5	C. elegans	1	FALSE	10.3472	152.84	13.1241	8.27013	4126.45
C. elegans_12.5	C. elegans	1	FALSE	2.0857	60.7409	8.30041	5.44218	1160.58
C. elegans_12.5	C. elegans	1	FALSE	4.94794	68.8562	12.3973	7.524	1930.69
C. elegans_12.5	C. elegans	1	FALSE	3.7181	84.181	9.90179	6.24002	1865.21
C. elegans_12.5	C. elegans	1	FALSE	0.0323397	12.8831	0	1.08523	62.0666
C. elegans_12.5	C. elegans	1	FALSE	9.30614	130.074	14.0032	8.19639	3643.07
C. elegans_12.5	C. elegans	1	FALSE	5.52757	76.3789	11.5106	8.01397	2195.3
C. elegans_12.5	C. elegans	1	FALSE	0.436645	32.8701	4.60424	3.01555	390.084
C. elegans_12.5	C. elegans	1	FALSE	23.5019	172.35	14.6506	11.9677	6681.68
C. elegans_12.5	C. elegans	1	FALSE	20.138	202.138	10.4233	10.7381	6892.84
C. elegans_12.5	C. elegans	1	TRUE	26.0039	217.092	13.1241	11.5849	7919.96
C. elegans_12.5	C. elegans	1	FALSE	0.26762	27.1726	3.63997	2.37731	265.796
C. elegans_12.5	C. elegans	1	TRUE	46.6717	204.917	24.4177	15.2283	10137.8
C. elegans_12.5	C. elegans	1	FALSE	22.9256	180.744	11.8509	11.2421	6618.75
C. elegans_12.5	C. elegans	1	TRUE	19.4438	179.117	15.008	10.8793	6176.53
C. elegans_12.5	C. elegans	1	FALSE	14.77	136.817	11.8509	10.3443	4819.79
C. elegans_12.5	C. elegans	1	FALSE	0.397197	19.1152	8.13922	3.32173	315.571
C. elegans_12.5	C. elegans	1	FALSE	0.0374607	11.9295	0	1.21332	66.4674
C. elegans_12.5	C. elegans	1	FALSE	8.55572	129.376	6.90636	8.17605	3496.17
C. elegans_12.5	C. elegans	1	FALSE	15.5908	189.837	12.3973	9.14799	5629.67
C. elegans_12.5	C. elegans	1	FALSE	8.42438	104.447	11.8509	8.97321	3140.36
C. elegans_12.5	C. elegans	1	FALSE	1.14917	33.7658	8.13922	4.91577	652.188
C. elegans_12.5	C. elegans	1	FALSE	2.25422	51.3688	6.71177	5.81539	1144.43
C. elegans_12.5	C. elegans	1	FALSE	1.42629	30.7076	9.90179	5.38007	694.499
C. elegans_12.5	C. elegans	1	FALSE	25.2107	173.511	17.3042	12.1909	6958.11
C. elegans_12.5	C. elegans	1	TRUE	39.1786	196.011	24.9012	14.4225	9227.25
C. elegans_12.5	C. elegans	1	TRUE	17.8653	188.407	11.5106	10.2173	6130.47
C. elegans_12.5	C. elegans	1	FALSE	28.8884	188.802	14.0032	13.17	7873.34
C. elegans_12.5	C. elegans	1	TRUE	33.2888	189.953	18.9838	13.9353	8406.09
C. elegans_12.5	C. elegans	1	TRUE	38.2582	216.707	18.5603	13.9382	9587.45
C. elegans_12.5	C. elegans	1	TRUE	40.5995	211.278	19.0534	14.3256	9789.51
C. elegans_12.5	C. elegans	1	FALSE	7.26573	77.4482	12.3973	9.39008	2526.08
C. elegans_12.5	C. elegans	1	TRUE	54.2697	224.056	20.1353	16.2335	11368.6
C. elegans_12.5	C. elegans	1	TRUE	28.9547	217.116	15.008	12.4779	8413.26
C. elegans_12.5	C. elegans	1	TRUE	35.0179	216.393	17.6078	13.4167	9180.21
C. elegans_6.3	C. elegans	1	FALSE	7.44434	122.387	10.4233	8.11407	3201.71
C. elegans_6.3	C. elegans	1	FALSE	19.9966	163.618	11.3949	11.4936	6089.99
C. elegans_6.3	C. elegans	1	TRUE	24.9457	207.127	19.6018	11.5905	7654.17
C. elegans_6.3	C. elegans	1	TRUE	25.2511	192.732	16.2784	12.016	7421.94
C. elegans_6.3	C. elegans	1	TRUE	30.3803	203.173	15.357	12.6123	8176.64
C. elegans_6.3	C. elegans	1	TRUE	27.4895	197.5	16.0324	12.1804	7785.65
C. elegans_6.3	C. elegans	1	FALSE	4.14307	68.4612	9.76706	7.40125	1776.22
C. elegans_6.3	C. elegans	1	FALSE	0.655977	18.9177	6.51138	4.10329	395.475
C. elegans_6.3	C. elegans	1	TRUE	27.6667	198.651	16.6008	12.4658	7855.85
C. elegans_6.3	C. elegans	1	TRUE	22.5547	196.175	12.7139	11.2796	6936.56
C. elegans_6.3	C. elegans	1	TRUE	32.4829	207.127	15.4431	12.7238	8519.34
C. elegans_6.3	C. elegans	1	TRUE	23.6831	219.837	13.1241	10.928	7685.22
C. elegans_6.3	C. elegans	1	FALSE	18.4638	185.816	11.5106	10.4879	6168.22
C. elegans_6.3	C. elegans	1	TRUE	45.1407	221.59	24.7946	14.7939	10182.8
C. elegans_6.3	C. elegans	1	TRUE	35.1728	218.161	16.6008	13.3405	9301.34
C. elegans_6.3	C. elegans	1	TRUE	75.1813	209.102	26.4994	19.7567	13363
C. elegans_6.3	C. elegans	1	TRUE	21.5798	209.198	13.1241	10.8219	7194.36
C. elegans_6.3	C. elegans	1	FALSE	10.4886	145.596	11.3949	8.87118	4130.57
C. elegans_6.3	C. elegans	1	FALSE	14.9388	165.896	13.4235	9.56239	5152.52
C. elegans_6.3	C. elegans	1	TRUE	44.3987	225.789	21.162	14.7236	10436.7
C. elegans_6.3	C. elegans	1	TRUE	24.5462	208.615	16.2784	11.1973	7452.54
C. elegans_6.3	C. elegans	1	TRUE	42.7701	210.45	19.6018	14.6331	10009.3
C. elegans_6.3	C. elegans	1	TRUE	36.4822	219.928	20.5908	13.2301	9255.01
C. elegans_6.3	C. elegans	1	TRUE	29.3863	208.22	18.5603	12.4323	8224.12
C. elegans_6.3	C. elegans	1	TRUE	24.3926	217.848	15.008	11.048	7612.73
C. elegans_6.3	C. elegans	1	TRUE	36.2264	210.277	21.162	13.7422	9009.31
C. elegans_6.3	C. elegans	1	TRUE	53.3164	210.195	16.7597	16.3213	10914.1
C. elegans_6.3	C. elegans	1	TRUE	32.2116	230.148	16.2784	12.1941	9008.8
C. elegans_6.3	C. elegans	1	FALSE	0.0809851	12.6038	0	1.7159	105.901
C. elegans_6.3	C. elegans	1	TRUE	68.6021	217.66	24.1996	18.7959	12791.2
C. elegans_6.3	C. elegans	1	TRUE	55.658	224.359	24.6337	16.3999	11631.8
C. elegans_6.3	C. elegans	1	FALSE	25.6379	191.244	15.4431	11.8594	7367.23
C. elegans_6.3	C. elegans	1	TRUE	31.2155	217.405	17.3042	12.5714	8606.09
C. elegans_6.3	C. elegans	1	TRUE	32.9248	220.521	13.9083	12.4877	8901.41
C. elegans_6.3	C. elegans	1	TRUE	37.246	206.092	17.3042	13.9166	9202.32
C. elegans_6.3	C. elegans	1	FALSE	3.28021	101.331	6.51138	5.69056	1885.67
C. elegans_6.3	C. elegans	1	FALSE	1.54094	50.0203	6.71177	4.86733	911.928
C. elegans_6.3	C. elegans	1	TRUE	27.8437	204.849	17.5324	12.1467	7918.88
C. elegans_6.3	C. elegans	1	TRUE	32.7259	211.231	19.8704	12.678	8785.6
C. elegans_6.3	C. elegans	1	TRUE	57.0578	236.636	22.1411	16.0916	12071.1
C. elegans_6.3	C. elegans	1	TRUE	29.3788	241.23	17.9063	11.5714	8805.28
C. elegans_6.3	C. elegans	1	TRUE	35.5785	226.719	16.2784	13.3939	9606.34
C. elegans_6.3	C. elegans	1	FALSE	15.517	197.476	10.9199	9.48442	5857.54
C. elegans_6.3	C. elegans	1	TRUE	19.4227	216.393	16.2784	9.66264	6650.46
C. elegans_6.3	C. elegans	1	TRUE	26.9746	213.87	16.3596	11.413	7848.61
C. elegans_6.3	C. elegans	1	FALSE	3.28873	102.4	6.71177	5.5668	1866.88
C. elegans_6.3	C. elegans	1	FALSE	3.42749	128.701	6.71177	5.31383	2209.26
C. elegans_6.3	C. elegans	1	TRUE	62.7055	225.939	24.848	17.6263	12547.4
C. elegans_6.3	C. elegans	1	TRUE	47.9481	218.277	25.4798	15.6062	10779.3
C. elegans_6.3	C. elegans	1	TRUE	45.8882	225.313	21.7181	15.2443	10830.1
C. elegans_6.3	C. elegans	1	TRUE	21.2899	216.639	13.1241	10.3129	7027.89
C. elegans_6.3	C. elegans	1	TRUE	26.8425	209.266	13.4235	12.1291	7893.16
C. elegans_6.3	C. elegans	1	FALSE	18.1115	166.479	11.8509	10.973	5925.98
C. elegans_6.3	C. elegans	1	TRUE	35.1965	206.684	17.5324	13.436	8777.39
C. elegans_6.3	C. elegans	1	TRUE	33.5599	234.497	13.9083	12.6349	9319.92
C. elegans_6.3	C. elegans	1	TRUE	36.0506	206.034	17.9801	13.9237	9057.42
C. elegans_6.3	C. elegans	1	TRUE	40.754	196.768	21.162	14.5933	9341.15
C. elegans_6.3	C. elegans	1	FALSE	5.16129	86.7385	9.49188	7.54472	2208.46
C. elegans_6.3	C. elegans	1	FALSE	8.79366	147.874	10.9199	7.89931	3760.08
C. elegans_6.3	C. elegans	1	TRUE	27.7616	198.998	15.008	12.3059	7959.32
C. elegans_6.3	C. elegans	1	FALSE	1.84483	47.8917	8.13922	5.42615	996.639
C. elegans_6.3	C. elegans	1	TRUE	21.3566	177.291	14.0032	11.0896	6288.71
C. elegans_6.3	C. elegans	1	TRUE	41.4462	227.451	14.6506	13.8302	10155.9
C. elegans_6.3	C. elegans	1	FALSE	23.9655	177.523	13.9083	12.173	6832.74
C. elegans_6.3	C. elegans	1	TRUE	26.7216	211.558	13.4235	11.5556	7942.88
C. elegans_6.3	C. elegans	1	TRUE	29.1286	219.418	11.8509	11.827	8377.26
C. elegans_6.3	C. elegans	1	TRUE	29.6181	212.068	15.357	12.607	8345.36
C. elegans_6.3	C. elegans	1	FALSE	19.6446	189.558	12.7139	10.4887	6571.19
C. elegans_6.3	C. elegans	1	TRUE	26.1944	205.836	16.6008	11.6929	7772.13
C. elegans_6.3	C. elegans	1	TRUE	26.8119	225.033	9.76706	11.594	8197.95
C. elegans_6.3	C. elegans	1	TRUE	43.4674	223.777	18.1998	14.4297	10339.2
C. elegans_6.3	C. elegans	1	TRUE	28.1766	214.823	15.357	11.9683	8291.17
C. elegans_6.3	C. elegans	1	TRUE	14.3843	198.545	11.8509	8.921	5633.23
C. elegans_6.3	C. elegans	1	TRUE	19.8447	203.265	16.7597	10.235	6630.81
C. elegans_6.3	C. elegans	1	FALSE	21.5251	187.232	11.8509	10.9321	6688.16
C. elegans_6.3	C. elegans	1	TRUE	28.9395	211.765	13.1241	12.5221	8221.52
C. elegans_6.3	C. elegans	1	TRUE	26.5169	181.173	18.1998	12.2273	7272.5
C. elegans_6.3	C. elegans	1	TRUE	27.9124	213.219	15.4431	12.0793	8106.32
C. elegans_3.1	C. elegans	1	TRUE	23.7152	201.314	13.4235	11.3499	7159.5
C. elegans_3.1	C. elegans	1	FALSE	313.719	145.095	81.7981	42.0758	28590.1
C. elegans_3.1	C. elegans	1	TRUE	27.3554	203.65	13.1241	12.1464	7819.51
C. elegans_3.1	C. elegans	1	FALSE	43.1039	186.105	24.848	15.568	9092.63
C. elegans_3.1	C. elegans	1	TRUE	23.4927	214.847	10.9199	11.106	7487.22
C. elegans_3.1	C. elegans	1	TRUE	25.2363	211.544	16.1148	11.1926	7530.22
C. elegans_3.1	C. elegans	1	FALSE	23.2251	172.653	16.1148	11.8677	6624.37
C. elegans_3.1	C. elegans	1	FALSE	2.8527	69.3908	8.76621	5.52659	1426.53
C. elegans_3.1	C. elegans	1	FALSE	3.3843	56.2284	10.9199	6.93451	1447.27
C. elegans_3.1	C. elegans	1	FALSE	2.86242	77.7035	8.13922	5.74204	1571.11
C. elegans_3.1	C. elegans	1	FALSE	10.1443	109.981	15.008	9.4095	3481.04
C. elegans_3.1	C. elegans	1	FALSE	9.84354	163.339	11.3949	7.9301	4134.02
C. elegans_3.1	C. elegans	1	FALSE	8.09772	158.34	9.90179	7.26423	3730.72
C. elegans_3.1	C. elegans	1	TRUE	29.9399	208.673	16.0324	12.5057	8365.03
C. elegans_3.1	C. elegans	1	TRUE	40.2116	218.103	17.9063	14.175	9703.7
C. elegans_3.1	C. elegans	1	TRUE	40.3349	212.497	15.4431	14.2601	9559.39
C. elegans_3.1	C. elegans	1	FALSE	5.30175	200.755	3.63997	5.35823	3384.5
C. elegans_3.1	C. elegans	1	FALSE	10.2785	195.14	9.76706	7.61928	4780.56
C. elegans_3.1	C. elegans	1	FALSE	4.10793	89.8545	8.13922	6.53021	2036.04
C. elegans_3.1	C. elegans	1	FALSE	1.01904	56.1945	5.14769	3.80177	780.55
C. elegans_3.1	C. elegans	1	TRUE	29.214	193.488	14.7408	12.9427	7918.25
C. elegans_3.1	C. elegans	1	FALSE	27.5491	167.548	19.6018	13.2157	7354.95
C. elegans_3.1	C. elegans	1	TRUE	25.378	190.059	15.008	12.1565	7323.3
C. elegans_3.1	C. elegans	1	TRUE	24.8577	205.952	15.008	11.4961	7505.61
C. elegans_3.1	C. elegans	1	TRUE	35.6061	211.115	14.6506	13.595	9062.54
C. elegans_3.1	C. elegans	1	TRUE	32.8771	204.151	19.8036	13.2014	8730.14
C. elegans_3.1	C. elegans	1	TRUE	23.677	221.917	17.9801	10.4372	7363.86
C. elegans_3.1	C. elegans	1	TRUE	38.3551	216.032	17.6078	13.9438	9621.25
C. elegans_3.1	C. elegans	1	TRUE	29.6475	210.614	20.5908	12.5503	8202.33
C. elegans_3.1	C. elegans	1	FALSE	0.0663171	10.9181	0	1.62784	91.9731
C. elegans_3.1	C. elegans	1	TRUE	30.0487	214.125	19.0534	12.5987	8469.37
C. elegans_3.1	C. elegans	1	TRUE	28.3336	193.883	15.008	12.3976	7693.53
C. elegans_3.1	C. elegans	1	TRUE	25.3149	196.267	14.6506	11.9484	7353.59
C. elegans_3.1	C. elegans	1	TRUE	28.9221	189.418	18.9838	12.8168	7686.43
C. elegans_3.1	C. elegans	1	FALSE	4.10416	50.1021	11.8509	7.89133	1505.42
C. elegans_3.1	C. elegans	1	FALSE	4.11269	45.1367	11.8509	8.39023	1514.28
C. elegans_3.1	C. elegans	1	TRUE	30.6384	217.602	14.6506	12.6353	8616.69
C. elegans_3.1	C. elegans	1	TRUE	39.4397	213.253	17.6078	13.5804	9502.19
C. elegans_3.1	C. elegans	1	TRUE	30.5039	208.649	12.3973	12.7952	8425.58
C. elegans_3.1	C. elegans	1	FALSE	22.6464	174.873	15.008	11.4896	6429.71
C. elegans_3.1	C. elegans	1	FALSE	15.9005	138.237	14.6506	11.3	5101.94
C. elegans_3.1	C. elegans	1	TRUE	26.6752	211.312	14.5599	11.5604	7769.28
C. elegans_3.1	C. elegans	1	FALSE	2.85938	57.7405	9.90179	6.22141	1374.28
C. elegans_3.1	C. elegans	1	FALSE	16.0346	168.733	12.3973	9.80885	5351.03
C. elegans_3.1	C. elegans	1	TRUE	24.6357	214.043	11.5106	11.1864	7619.3
C. elegans_3.1	C. elegans	1	FALSE	26.2911	193.43	16.9952	12.2191	7511.58
C. elegans_3.1	C. elegans	1	FALSE	7.55412	88.2845	11.5106	8.99242	2728.37
C. elegans_3.1	C. elegans	1	FALSE	3.99153	40.73	14.7408	8.46197	1420.14
C. elegans_3.1	C. elegans	1	FALSE	6.28512	110.737	10.4233	7.63305	2789.59
C. elegans_3.1	C. elegans	1	FALSE	13.0887	182.594	11.3949	8.80135	5088.75
C. elegans_3.1	C. elegans	1	FALSE	5.37841	115.76	10.4233	6.78665	2625.11
C. elegans_3.1	C. elegans	1	FALSE	4.2009	46.7067	13.1241	8.29673	1523.38
C. elegans_3.1	C. elegans	1	FALSE	0.0401358	15.1852	0	1.08523	75.8998
C. elegans_3.1	C. elegans	1	FALSE	0.154931	19.4523	2.30212	1.86245	175.441
C. elegans_3.1	C. elegans	1	FALSE	14.1018	204.965	8.76621	8.66541	5708.3
C. elegans_3.1	C. elegans	1	FALSE	7.08047	105.006	9.49188	8.12147	2872.18
C. elegans_3.1	C. elegans	1	FALSE	1.80786	62.3448	7.27994	4.95741	1109.88
C. elegans_3.1	C. elegans	1	FALSE	0.0106802	16.3941	0	0.542615	39.6049
C. elegans_3.1	C. elegans	1	FALSE	6.98101	148.235	8.13922	6.99346	3381.76
C. elegans_3.1	C. elegans	1	FALSE	2.29509	65.0658	8.13922	5.78785	1273.36
C. elegans_3.1	C. elegans	1	FALSE	2.53022	79.1339	6.90636	5.32773	1449.01
C. elegans_3.1	C. elegans	1	FALSE	9.35739	145.909	9.90179	8.13067	3854.09
C. elegans_3.1	C. elegans	1	TRUE	20.0856	198.824	13.4235	10.6284	6681.96
C. elegans_3.1	C. elegans	1	FALSE	16.5794	190.627	11.3949	9.77919	5866.27
C. elegans_3.1	C. elegans	1	FALSE	22.2785	161.003	16.3596	12.316	6371.44
C. elegans_3.1	C. elegans	1	FALSE	13.4393	145.177	11.5106	9.78841	4644.41
C. elegans_3.1	C. elegans	1	FALSE	21.6553	193.127	16.9952	10.9635	6745.05
C. elegans_3.1	C. elegans	1	FALSE	5.06122	63.3562	11.7385	8.58308	1952.11
C. elegans_3.1	C. elegans	1	FALSE	2.5461	32.7304	8.30041	6.94019	997.935
C. elegans_3.1	C. elegans	1	TRUE	25.9633	211.394	14.7408	11.9838	8040.02
C. elegans_3.1	C. elegans	1	FALSE	25.608	198.593	16.0324	12.2684	7598.33
C. elegans_3.1	C. elegans	1	FALSE	17.9699	168.083	11.5106	10.2066	5781.1
C. elegans_3.1	C. elegans	1	FALSE	1.53567	40.0557	7.27994	5.13858	828.959
C. elegans_3.1	C. elegans	1	TRUE	21.8532	221.754	13.4235	10.3229	7272.41
C. elegans_3.1	C. elegans	1	TRUE	35.1468	235.764	16.6008	12.6811	9380.65
C. elegans_3.1	C. elegans	1	TRUE	35.1441	203.708	14.5599	13.3571	8831.82
C. elegans_3.1	C. elegans	1	FALSE	5.94909	62.0316	13.4235	9.15915	2065.03
C. elegans_3.1	C. elegans	1	TRUE	21.0847	225.789	13.4235	10.2875	7310.81
C. elegans_3.1	C. elegans	1	FALSE	22.4854	183.769	15.008	11.471	6823.68
C. elegans_3.1	C. elegans	1	FALSE	1.965	44.1253	8.76621	5.9945	967.741
C. elegans_3.1	C. elegans	1	FALSE	2.43871	55.5541	8.13922	5.99628	1215.64
C. elegans_3.1	C. elegans	1	FALSE	18.3584	161.013	11.3949	11.1653	5745.75
C. elegans_3.1	C. elegans	1	FALSE	9.06149	130.445	9.49188	8.63439	3656.42
C. elegans_3.1	C. elegans	1	FALSE	6.12962	65.798	14.0032	9.01929	2153.59
C. elegans_3.1	C. elegans	1	TRUE	24.4615	201.777	13.9083	11.6849	7524.6
C. elegans_3.1	C. elegans	1	FALSE	12.7508	163.479	11.5106	9.33855	4887.95
C. elegans_3.1	C. elegans	1	FALSE	23.4787	183.152	14.5599	11.3558	6793.58
C. elegans_3.1	C. elegans	1	FALSE	19.2663	156.967	13.9083	11.5988	5824.05
C. elegans_3.1	C. elegans	1	TRUE	22.462	198.453	13.1241	11.0145	6972.14
C. elegans_3.1	C. elegans	1	TRUE	31.7886	206.044	11.8509	13.094	8568.97
C. elegans_3.1	C. elegans	1	FALSE	52.1825	360.025	13.1241	13.2079	14566.8
C. elegans_3.1	C. elegans	1	TRUE	39.0499	226.392	17.3042	13.5943	9707.83
C. elegans_3.1	C. elegans	1	TRUE	39.2411	212.406	16.7597	14.096	9514.35
C. elegans_3.1	C. elegans	1	FALSE	19.3905	187.419	11.7385	10.5642	6316.17
C. elegans_3.1	C. elegans	1	FALSE	3.42043	64.1362	8.76621	6.70554	1573.44
C. elegans_3.1	C. elegans	1	FALSE	0.470748	24.673	6.71177	3.35589	347.293
C. elegans_3.1	C. elegans	1	FALSE	4.22165	79.7164	9.90179	7.20409	1918.84
C. elegans_3.1	C. elegans	1	FALSE	8.43463	82.1921	13.8127	9.37888	2805.38
C. elegans_3.1	C. elegans	1	FALSE	0.403413	29.1376	5.86927	2.93464	340.031
C. elegans_3.1	C. elegans	1	TRUE	18.8542	190.767	15.357	10.105	6159.48
C. elegans_3.1	C. elegans	1	TRUE	27.2888	217.173	16.6008	11.9934	8184.51
C. elegans_3.1	C. elegans	1	FALSE	1.21611	39.6607	8.30041	4.67249	716.726
C. elegans_3.1	C. elegans	1	FALSE	1.91895	54.2874	7.27994	5.54584	1048.39
C. elegans_3.1	C. elegans	1	FALSE	1.26254	41.6835	7.27994	4.60691	743.699
C. elegans_3.1	C. elegans	1	FALSE	21.9117	201.15	13.1241	11.0269	7022.73
C. elegans_3.1	C. elegans	1	FALSE	11.7545	180.046	8.13922	8.36845	4795.64
C. elegans_3.1	C. elegans	1	FALSE	11.5665	149.781	6.51138	9.1491	4387.61
C. elegans_3.1	C. elegans	1	FALSE	12.8182	152.084	14.7408	9.25272	4629.95
C. elegans_3.1	C. elegans	1	TRUE	45.6385	229.45	17.6078	14.9126	10698.5
C. elegans_3.1	C. elegans	1	TRUE	43.1449	222.394	19.5341	14.2454	10182.5
C. elegans_3.1	C. elegans	1	TRUE	68.4233	235.056	26.4994	17.8516	13316.9
C. elegans_3.1	C. elegans	1	TRUE	64.9983	218.975	24.848	17.6419	12378.8
C. elegans_3.1	C. elegans	1	FALSE	20.8493	76.0418	24.1996	15.8896	4440.23
C. elegans_3.1	C. elegans	1	FALSE	0.0638825	18.8937	0	1.21332	107.369
C. elegans_3.1	C. elegans	1	FALSE	16.1064	197.524	15.008	9.28713	5735.35
C. elegans_3.1	C. elegans	1	FALSE	28.9396	220.044	15.008	11.3099	8078.1
C. elegans_3.1	C. elegans	1	TRUE	45.1911	222.51	13.4235	14.5705	10269.5
C. elegans_3.1	C. elegans	1	TRUE	21.0381	217.463	10.9199	10.3813	7135.08
C. elegans_3.1	C. elegans	1	FALSE	25.207	161.061	19.0534	12.7502	6594.47
C. elegans_3.1	C. elegans	1	TRUE	45.0476	202.72	26.0455	15.4027	9756.96
C. elegans_3.1	C. elegans	1	TRUE	32.6746	214.592	12.3973	13.1188	8988.39
C. elegans_3.1	C. elegans	1	TRUE	20.2929	216.673	13.9083	9.97148	6942.27
C. elegans_3.1	C. elegans	1	TRUE	33.5069	232.811	18.1998	12.3334	9095.58
C. elegans_3.1	C. elegans	1	TRUE	31.7924	219.765	18.417	12.4763	8643.66
C. elegans_3.1	C. elegans	1	TRUE	28.1582	212.685	17.5324	12.3572	8240.45
C. elegans_3.1	C. elegans	1	TRUE	41.1341	215.719	19.8036	14.6962	9884.01
C. elegans_3.1	C. elegans	1	TRUE	25.6621	198.545	15.008	11.6629	7542.63
C. elegans_3.1	C. elegans	1	FALSE	10.6632	112.423	12.3973	9.78434	3703.23
C. elegans_3.1	C. elegans	1	FALSE	22.9357	156.746	16.2784	12.519	6355.42
C. elegans_3.1	C. elegans	1	TRUE	28.9368	210.45	13.9083	12.4498	8413.03
C. elegans_3.1	C. elegans	1	TRUE	34.6595	215.801	18.417	12.9667	9068.99
C. elegans_3.1	C. elegans	1	TRUE	14.794	189.837	13.0228	9.26763	5580.65
C. elegans_3.1	C. elegans	1	TRUE	25.1081	205.846	13.0228	11.5362	7483.23
C. elegans_3.1	C. elegans	1	TRUE	27.4458	214.197	14.5599	11.1692	7736.19
C. elegans_3.1	C. elegans	1	TRUE	29.2169	212.998	12.7139	12.1304	8274.86
C. elegans_3.1	C. elegans	1	TRUE	19.2191	212.218	8.13922	9.836	6526.79
C. elegans_3.1	C. elegans	1	FALSE	1.71512	80.7039	7.27994	4.38268	1214.69
C. elegans_3.1	C. elegans	1	FALSE	0.998922	58.2991	6.71177	3.88929	796.511
C. elegans_3.1	C. elegans	1	FALSE	1.95942	54.3452	9.49188	5.25293	1067.03
C. elegans_3.1	C. elegans	1	TRUE	34.0648	211.37	19.6018	13.0974	8875.12
C. elegans_3.1	C. elegans	1	TRUE	25.5618	208.976	17.9063	11.71	7585.07
C. elegans_3.1	C. elegans	1	FALSE	25.1576	214.5	18.1998	11.3119	7841.77
C. elegans_3.1	C. elegans	1	TRUE	50.3426	204.835	20.5908	16.3469	10628.4
C. elegans_3.1	C. elegans	1	TRUE	54.5104	225.37	18.5603	16.4145	11657.5
C. elegans_3.1	C. elegans	1	TRUE	50.8963	217.915	20.5908	16.14	11175.3
C. elegans_3.1	C. elegans	1	FALSE	48.3806	207.753	18.1998	16.2819	10843.1
C. elegans_3.1	C. elegans	1	TRUE	31.3397	193.43	14.7408	13.5998	8431.21
C. elegans_3.1	C. elegans	1	TRUE	26.4014	203.313	14.6506	11.6849	7663.13
C. elegans_3.1	C. elegans	1	FALSE	7.59024	113.376	11.8509	8.2889	3071.05
C. elegans_3.1	C. elegans	1	FALSE	11.2314	186.36	11.5106	8.01127	4729.17
C. elegans_3.1	C. elegans	1	TRUE	35.0976	220.265	16.3596	13.4836	9377.22
C. elegans_3.1	C. elegans	1	TRUE	25.8049	228.439	13.1241	11.3123	8058.08
C. elegans_3.1	C. elegans	1	TRUE	34.3861	205.615	16.7597	13.8084	8970.6
C. elegans_3.1	C. elegans	1	TRUE	33.3735	217.439	14.7408	12.7406	9005.34
C. elegans_3.1	C. elegans	1	TRUE	36.7191	202.976	13.4235	13.8553	9158.92
C. elegans_3.1	C. elegans	1	TRUE	22.5819	217.231	14.0032	10.6426	7305.97
C. elegans_3.1	C. elegans	1	TRUE	21.9293	190.338	13.1241	11.0783	6666.74
C. elegans_3.1	C. elegans	1	FALSE	45.0716	200.081	17.9063	15.5041	10006.5
C. elegans_3.1	C. elegans	1	TRUE	46.9087	210.58	16.6008	15.6536	10495.9
C. elegans_3.1	C. elegans	1	FALSE	39.4355	189.163	18.5603	15.0226	9131.14
C. elegans_3.1	C. elegans	1	FALSE	38.1544	200.697	20.3968	14.5709	9123.41
C. elegans_3.1	C. elegans	1	TRUE	28.8642	204.161	20.8466	11.9781	7805.78
C. elegans_3.1	C. elegans	1	FALSE	641.854	161.508	30.9718	53.3567	72089.8
C. elegans_3.1	C. elegans	1	FALSE	20.909	184.872	16.7597	10.6121	6375.19
C. elegans_3.1	C. elegans	1	TRUE	36.4746	229.358	18.1998	13.566	9748.28
C. elegans_3.1	C. elegans	1	TRUE	21.9664	204.103	14.5599	10.762	7146.6
C. elegans_3.1	C. elegans	1	TRUE	43.1646	213.138	19.0534	14.7047	10001.4
C. elegans_3.1	C. elegans	1	FALSE	92.5558	182.035	16.2784	20.0616	14137.4
C. elegans_3.1	C. elegans	1	FALSE	62.4046	297.79	16.9952	15.067	14110.6
C. elegans_3.1	C. elegans	1	TRUE	24.0213	201.406	16.7597	11.5496	7449.81
C. elegans_3.1	C. elegans	1	TRUE	34.9374	208.533	19.8036	13.3521	8949.9
C. elegans_3.1	C. elegans	1	FALSE	1.08469	24.3359	10.9199	5.17174	553.498
C. elegans_3.1	C. elegans	1	FALSE	0.812975	28.7426	8.30041	4.14132	507.302
C. elegans_3.1	C. elegans	1	TRUE	28.8107	219.09	15.357	12.0946	8299.23
C. elegans_3.1	C. elegans	1	TRUE	39.2136	209.521	16.7597	14.3543	9680.72
C. elegans_3.1	C. elegans	1	FALSE	4.82207	80.4485	9.76706	7.49924	2099.34
C. elegans_3.1	C. elegans	1	TRUE	38.7866	206.602	19.6018	14.095	9447.15
C. elegans_3.1	C. elegans	1	FALSE	41.1951	207.72	17.3042	15.0756	9867.78
C. elegans_3.1	C. elegans	1	FALSE	36.7331	193.941	15.008	14.4797	9157.14
C. elegans_3.1	C. elegans	1	FALSE	17.2083	199.383	15.008	9.49494	6257.86
C. elegans_3.1	C. elegans	1	FALSE	18.4099	140.096	16.9952	11.7534	5423.67
C. elegans_3.1	C. elegans	1	FALSE	1.63719	59.3684	6.71177	4.81121	1023.17
C. elegans_3.1	C. elegans	1	FALSE	83.1964	396.348	38.6934	15.5232	19428.4
C. elegans_3.1	C. elegans	1	TRUE	34.0001	196.917	21.2245	13.4381	8606.83
C. elegans_3.1	C. elegans	1	FALSE	5.54302	52.1009	8.76621	8.59933	1844.39
C. elegans_3.1	C. elegans	1	FALSE	12.6778	168.222	13.1241	8.85284	4843.75
C. elegans_3.1	C. elegans	1	TRUE	29.9891	192.289	15.008	13.2525	8109.08
C. elegans_3.1	C. elegans	1	FALSE	30.9559	208.673	15.357	12.983	8602.62
C. elegans_3.1	C. elegans	1	TRUE	35.1613	210.474	16.7597	13.8078	8993.25
C. elegans_3.1	C. elegans	1	FALSE	21.7922	155.71	16.6008	11.9468	5953.69
C. elegans_3.1	C. elegans	1	FALSE	0.241682	14.5109	0	2.71307	206.926
C. elegans_3.1	C. elegans	1	FALSE	18.1142	149.223	17.3042	11.2929	5424.53
C. elegans_3.1	C. elegans	1	FALSE	3.05438	53.8924	10.2954	7.01262	1343.02
C. elegans_3.1	C. elegans	1	FALSE	21.7821	167.861	13.4235	11.7925	6298.04
C. elegans_3.1	C. elegans	1	FALSE	0.577499	36.1257	5.14769	3.37725	462.847
C. elegans_3.1	C. elegans	1	FALSE	0.791618	32.1958	7.27994	4.10062	530.958
C. elegans_3.1	C. elegans	1	FALSE	0.324641	17.1502	0	2.92207	253.038
C. elegans_3.1	C. elegans	1	FALSE	16.9839	186.919	10.9199	10.1685	6012.3
C. elegans_3.1	C. elegans	1	TRUE	25.6182	198.256	16.7597	12.0495	7612.35
C. elegans_3.1	C. elegans	1	FALSE	7.99028	93.7266	11.5106	9.31745	2856.8
C. elegans_3.1	C. elegans	1	FALSE	1.78426	52.6595	6.51138	5.15622	990.238
C. elegans_3.1	C. elegans	1	FALSE	10.4084	151.501	13.8127	8.38529	4148.27
C. elegans_3.1	C. elegans	1	FALSE	3.37981	74.5875	7.27994	6.07545	1653.31
C. elegans_3.1	C. elegans	1	FALSE	13.7517	191.07	10.4233	9.04984	5464.55
C. elegans_3.1	C. elegans	1	TRUE	27.6335	199.243	19.6018	12.4818	7810.05
C. elegans_3.1	C. elegans	1	TRUE	39.7186	224.08	17.5324	13.7368	9780.42
C. elegans_3.1	C. elegans	1	TRUE	27.0256	205.952	13.4235	12.2841	8007.73
C. elegans_3.1	C. elegans	1	TRUE	27.5185	216.393	14.5599	12.0707	8212.11
C. elegans_3.1	C. elegans	1	FALSE	10.3244	98.2152	14.0032	9.98056	3347.85
C. elegans_3.1	C. elegans	1	TRUE	59.6168	227.567	21.2245	17.0644	12108.4
C. elegans_3.1	C. elegans	1	TRUE	29.4605	214.173	11.5106	12.3423	8245.34
C. elegans_3.1	C. elegans	1	TRUE	33.4822	206.987	20.3968	13.2375	8836.84
C. elegans_3.1	C. elegans	1	FALSE	7.96133	71.3797	14.6506	10.3012	2530.01
C. elegans_3.1	C. elegans	1	TRUE	33.9047	210.975	17.6078	13.0884	8769.77
C. elegans_3.1	C. elegans	1	TRUE	29.086	208.37	16.2784	12.3385	8242.51
C. elegans_3.1	C. elegans	1	TRUE	43.2408	221.426	19.6018	14.2915	10142.6
C. elegans_3.1	C. elegans	1	FALSE	16.3747	144.387	11.8509	11.221	5169.15
C. elegans_3.1	C. elegans	1	FALSE	1.43156	30.5679	8.30041	5.4724	709.283
C. elegans_3.1	C. elegans	1	FALSE	18.8686	183.292	10.9199	10.5671	6268.19
C. elegans_3.1	C. elegans	1	FALSE	16.9488	166.932	13.9083	10.483	5529.22
C. elegans_3.1	C. elegans	1	TRUE	29.3588	215.406	14.5599	12.3527	8386.23
C. elegans_3.1	C. elegans	1	FALSE	24.5704	212.579	14.0032	10.9019	7475.81
C. elegans_3.1	C. elegans	1	FALSE	20.3438	202.615	14.5599	10.4655	6505.41
C. elegans_3.1	C. elegans	1	FALSE	14.6494	127.724	14.0032	11.048	4603.27
C. elegans_3.1	C. elegans	1	TRUE	24.6352	199.556	18.5603	11.3724	7225.92
C. elegans_3.1	C. elegans	1	FALSE	32.2296	215.103	19.6018	12.9623	8778.84
C. elegans_3.1	C. elegans	1	TRUE	38.6313	222.568	13.4235	13.6638	9764.71
C. elegans_3.1	C. elegans	1	FALSE	19.9927	191.162	13.9083	10.6894	6508.78
C. elegans_3.1	C. elegans	1	TRUE	24.2379	230.394	11.3949	10.6905	7837.19
C. elegans_3.1	C. elegans	1	FALSE	15.7879	138.55	13.0228	10.8381	4958.27
C. elegans_3.1	C. elegans	1	FALSE	21.139	212.767	13.9083	10.5061	7076.11
C. elegans_3.1	C. elegans	1	TRUE	34.7326	210.72	18.1998	13.405	8957.62
C. elegans_3.1	C. elegans	1	FALSE	28.8684	205.138	15.4431	12.4341	8048.47
C. elegans_3.1	C. elegans	1	TRUE	35.4477	204.103	13.4235	13.258	8762.26
C. elegans_3.1	C. elegans	1	TRUE	20.5814	209.371	14.0032	10.6483	6915.56
C. elegans_3.1	C. elegans	1	FALSE	19.0774	204.883	15.4431	10.0057	6353.26
C. elegans_3.1	C. elegans	1	TRUE	25.8849	214.173	13.9083	11.567	7731.21
C. elegans_3.1	C. elegans	1	TRUE	34.5262	232.869	14.6506	12.8535	9381.45
C. elegans_3.1	C. elegans	1	TRUE	27.6071	203.698	15.4431	12.4249	7948.33
C. elegans_3.1	C. elegans	1	FALSE	4.67513	60.2401	11.7385	8.07136	1816.65
C. elegans_1.6	C. elegans	1	FALSE	8.86753	152.56	6.90636	7.92953	3931.04
C. elegans_1.6	C. elegans	1	FALSE	48.086	151.328	20.8466	17.9433	9128.26
C. elegans_1.6	C. elegans	1	FALSE	23.9811	179.651	15.357	12.0702	7013.24
C. elegans_1.6	C. elegans	1	TRUE	19.4404	213.614	15.008	10.0281	6726.06
C. elegans_1.6	C. elegans	1	TRUE	24.7055	211.534	15.008	11.4911	7596.08
C. elegans_1.6	C. elegans	1	TRUE	59.0045	206.034	24.9012	17.8104	11471.1
C. elegans_1.6	C. elegans	1	TRUE	67.7879	200.255	26.6986	19.323	12092.7
C. elegans_1.6	C. elegans	1	TRUE	25.2015	217.313	16.2784	11.3551	7735
C. elegans_1.6	C. elegans	1	FALSE	16.2621	168.839	15.4431	10.1877	5538.94
C. elegans_1.6	C. elegans	1	TRUE	55.91	211.36	22.7898	17.2064	11577.8
C. elegans_1.6	C. elegans	1	TRUE	54.9692	216.87	21.8398	16.8289	11356
C. elegans_1.6	C. elegans	1	TRUE	15.5108	200.394	13.9083	8.99777	5830.78
C. elegans_1.6	C. elegans	1	TRUE	27.632	219.196	16.3596	11.9295	8217.16
C. elegans_1.6	C. elegans	1	FALSE	29.391	204.917	16.7597	12.5311	8230.81
C. elegans_1.6	C. elegans	1	TRUE	46.2096	213.985	20.8466	15.4175	10506.1
C. elegans_1.6	C. elegans	1	FALSE	26.2534	176.198	19.8036	12.4276	7119.7
C. elegans_1.6	C. elegans	1	TRUE	25.918	195.255	13.4235	12.2772	7536.63
C. elegans_1.6	C. elegans	1	TRUE	28.7046	196.57	17.5324	12.6308	7911.65
C. elegans_1.6	C. elegans	1	TRUE	28.1193	213.369	10.9199	12.2304	8213.06
C. elegans_1.6	C. elegans	1	TRUE	26.8003	195.987	14.6506	12.4122	7667.57
C. elegans_1.6	C. elegans	1	FALSE	16.098	164.432	13.9083	10.2373	5410.53
C. elegans_1.6	C. elegans	1	TRUE	50.0311	226.95	18.9838	15.5433	11163.4
C. elegans_1.6	C. elegans	1	FALSE	0.0266716	10.7785	0	1.21332	49.8512
C. elegans_1.6	C. elegans	1	TRUE	29.1801	184.092	19.6018	13.2421	7850.84
C. elegans_1.6	C. elegans	1	TRUE	21.3867	201.184	12.3973	10.9497	6968.26
C. briggsae_25	C. briggsae	1	TRUE	80.6388	216.591	32.7193	20.1921	13648.3
C. briggsae_25	C. briggsae	1	TRUE	44.6949	219.172	20.8466	15.1696	10508.8
C. briggsae_25	C. briggsae	1	TRUE	71.1742	209.988	24.4719	19.4386	12849.9
C. briggsae_25	C. briggsae	1	TRUE	74.6003	207.382	27.6733	19.8584	12929.3
C. briggsae_25	C. briggsae	1	FALSE	14.3504	74.6933	17.3042	12.7785	3560.24
C. briggsae_25	C. briggsae	1	FALSE	0.515569	24.7308	3.63997	3.10154	368.526
C. briggsae_25	C. briggsae	1	FALSE	32.5349	147.118	20.5908	15.2452	7348.34
C. briggsae_25	C. briggsae	1	FALSE	3.60701	64.9601	9.20848	6.51255	1628.78
C. briggsae_25	C. briggsae	1	TRUE	56.1487	201.035	24.4177	17.3469	11142.1
C. briggsae_25	C. briggsae	1	TRUE	42.7145	207.277	24.1996	14.76	9714.07
C. briggsae_25	C. briggsae	1	TRUE	55.2116	199.522	26.2482	16.9995	10824.1
C. briggsae_25	C. briggsae	1	TRUE	42.002	183.186	17.5324	15.8505	9419.07
C. briggsae_25	C. briggsae	1	TRUE	33.9802	204.464	16.0324	13.5068	8618.85
C. briggsae_25	C. briggsae	1	FALSE	13.7017	138.478	16.2784	9.82668	4520.23
C. briggsae_25	C. briggsae	1	TRUE	21.8909	188.489	15.008	11.3452	6781.17
C. briggsae_25	C. briggsae	1	FALSE	28.3701	180.465	14.5599	12.9175	7366.85
C. briggsae_25	C. briggsae	1	FALSE	29.1935	189.139	16.2784	13.0508	7741.25
C. briggsae_25	C. briggsae	1	TRUE	35.9643	211.602	16.3596	13.5499	9136.64
C. briggsae_25	C. briggsae	1	FALSE	15.8729	152.503	13.1241	10.4	5077.95
C. briggsae_25	C. briggsae	1	TRUE	66.5927	206.313	24.4719	18.9256	12495.2
C. briggsae_25	C. briggsae	1	TRUE	34.5154	206.568	21.8398	13.7694	8943.68
C. briggsae_25	C. briggsae	1	FALSE	16.2101	209.916	13.8127	8.78455	5873.65
C. briggsae_25	C. briggsae	1	FALSE	53.3788	203.255	22.1411	16.8436	10913.7
C. briggsae_25	C. briggsae	1	FALSE	16.978	177.128	13.9083	10.1713	5874.59
C. briggsae_25	C. briggsae	1	FALSE	4.02024	66.8912	10.4233	7.33991	1789.61
C. briggsae_25	C. briggsae	1	FALSE	5.28379	92.0409	10.2954	7.51258	2277.39
C. briggsae_25	C. briggsae	1	FALSE	4.02967	69.7279	10.9199	6.8893	1765.78
C. briggsae_25	C. briggsae	1	FALSE	2.17515	48.1949	11.3949	5.48125	1014.89
C. briggsae_25	C. briggsae	1	FALSE	3.37157	53.2181	11.5106	7.33475	1410.04
C. briggsae_25	C. briggsae	1	TRUE	53.8265	212.266	21.7181	16.6454	11056.2
C. briggsae_25	C. briggsae	1	FALSE	25.374	167.77	17.9801	12.2729	6648.28
C. briggsae_25	C. briggsae	1	TRUE	45.3484	204.825	21.2245	15.4456	10219.4
C. briggsae_25	C. briggsae	1	FALSE	36.2194	188.315	23.0212	14.6214	8619.77
C. briggsae_25	C. briggsae	1	TRUE	56.3966	205.114	25.4798	17.3146	11367.3
C. briggsae_25	C. briggsae	1	FALSE	17.1337	92.9127	16.3596	13.06	4347.06
C. briggsae_25	C. briggsae	1	TRUE	45.6019	210.325	16.6008	15.7582	10320.7
C. briggsae_25	C. briggsae	1	FALSE	28.207	208.428	17.5324	12.1663	8048.72
C. briggsae_25	C. briggsae	1	TRUE	32.9916	198.429	14.6506	13.7447	8569.14
C. briggsae_25	C. briggsae	1	TRUE	50.4864	205.87	20.3968	16.7014	10906
C. briggsae_25	C. briggsae	1	FALSE	22.8346	58.6941	29.8832	17.0218	4261.45
C. briggsae_25	C. briggsae	1	TRUE	73.9545	213.87	24.0348	18.9683	13038.8
C. briggsae_25	C. briggsae	1	FALSE	65.2749	155.676	25.4277	21.3403	11255
C. briggsae_25	C. briggsae	1	TRUE	87.934	207.859	20.1353	20.8077	14163.6
C. briggsae_25	C. briggsae	1	TRUE	54.5232	205.731	24.6337	16.2002	10907.3
C. briggsae_25	C. briggsae	1	FALSE	10.0447	138.666	10.4233	8.78345	3972.25
C. briggsae_25	C. briggsae	1	FALSE	0.0619883	10.4413	0	1.62784	88.8823
C. briggsae_25	C. briggsae	1	FALSE	33.3421	176.617	13.4235	13.8805	7925.13
C. briggsae_25	C. briggsae	1	TRUE	26.9514	213.846	16.2784	11.7941	7890.57
C. briggsae_25	C. briggsae	1	TRUE	91.646	196.883	21.8398	23.1402	14513.1
C. briggsae_25	C. briggsae	1	TRUE	69.5642	213.836	26.8471	18.8498	12519.9
C. briggsae_25	C. briggsae	1	TRUE	85.025	216.359	29.1198	20.762	14282.3
C. briggsae_25	C. briggsae	1	TRUE	44.4382	198.034	23.7018	15.5832	9929.79
C. briggsae_25	C. briggsae	1	TRUE	64.8691	208.278	24.4177	18.1451	12194.8
C. briggsae_25	C. briggsae	1	TRUE	82.5869	198.988	25.7385	21.2376	13935.2
C. briggsae_25	C. briggsae	1	FALSE	0.0764808	12.546	0	1.62784	101.89
C. briggsae_25	C. briggsae	1	TRUE	60.8721	208.673	21.162	17.7611	11997.3
C. briggsae_25	C. briggsae	1	FALSE	17.9833	155.734	13.8127	11.0091	5592.95
C. briggsae_25	C. briggsae	1	TRUE	50.6816	209.323	19.0534	16.7875	11049.6
C. briggsae_25	C. briggsae	1	FALSE	44.9972	199.802	20.1353	15.0444	9622.96
C. briggsae_25	C. briggsae	1	TRUE	55.9815	207.883	26.0963	16.7741	11030.1
C. briggsae_25	C. briggsae	1	FALSE	38.6429	197.928	20.8466	14.4844	9184.68
C. briggsae_25	C. briggsae	1	TRUE	57.1554	207.185	22.1411	17.3652	11425.3
C. briggsae_25	C. briggsae	1	FALSE	44.647	215.695	20.1353	14.9834	10215.8
C. briggsae_25	C. briggsae	1	TRUE	43.7548	202.667	13.4235	15.4086	9853.9
C. briggsae_25	C. briggsae	1	TRUE	51.1046	212.184	19.0534	16.2149	10990.8
C. briggsae_25	C. briggsae	1	TRUE	68.6509	215.348	22.1411	18.4536	12766
C. briggsae_25	C. briggsae	1	FALSE	45.3822	142.003	19.6018	18.5103	8811.97
C. briggsae_25	C. briggsae	1	TRUE	32.6227	235.1	16.9952	12.6268	9346.43
C. briggsae_25	C. briggsae	1	TRUE	59.8128	202.441	22.6147	18.3147	11707.1
C. briggsae_25	C. briggsae	1	FALSE	42.0646	69.694	34.3394	23.8991	6207.25
C. briggsae_25	C. briggsae	1	TRUE	93.7306	220.184	25.4798	21.4428	15241.9
C. briggsae_25	C. briggsae	1	TRUE	82.6988	216.359	29.9275	20.4965	14100
C. briggsae_25	C. briggsae	1	FALSE	168.849	211.789	23.3072	28.7762	21982.1
C. briggsae_25	C. briggsae	1	TRUE	77.7235	224.946	21.7181	19.1343	14049
C. briggsae_25	C. briggsae	1	FALSE	4.18679	105.098	8.13922	6.39233	2186.69
C. briggsae_25	C. briggsae	1	TRUE	39.2977	191.966	23.7018	14.4535	9005.63
C. briggsae_25	C. briggsae	1	FALSE	23.8647	144.421	19.8704	12.959	6172.5
C. briggsae_25	C. briggsae	1	TRUE	41.3176	197.581	18.1998	15.4758	9733.79
C. briggsae_25	C. briggsae	1	FALSE	33.2783	180.349	21.162	14.0985	8273.5
C. briggsae_25	C. briggsae	1	TRUE	44.425	211.264	24.1996	14.6559	10116.3
C. briggsae_25	C. briggsae	1	TRUE	69.1005	217.848	22.6732	18.3903	12645.8
C. briggsae_25	C. briggsae	1	TRUE	58.7255	214.51	23.3072	17.804	11840.2
C. briggsae_25	C. briggsae	1	TRUE	64.2618	225.939	24.848	17.6948	12473.8
C. briggsae_25	C. briggsae	1	FALSE	0.29848	33.2072	3.25569	2.40867	312.372
C. briggsae_25	C. briggsae	1	FALSE	7.10887	163.734	5.86927	6.74976	3529.95
C. briggsae_25	C. briggsae	1	TRUE	33.5725	212.545	18.5603	13.1008	8605.24
C. briggsae_25	C. briggsae	1	TRUE	30.7775	212.372	23.3072	12.401	8482.73
C. briggsae_25	C. briggsae	1	FALSE	14.9068	159.606	11.7385	10.2092	5136.66
C. briggsae_25	C. briggsae	1	FALSE	0.0761845	19.3945	2.30212	1.38945	123.946
C. briggsae_25	C. briggsae	1	FALSE	9.21726	59.6237	16.7597	11.3364	2521.05
C. briggsae_25	C. briggsae	1	FALSE	39.3407	166.257	18.1998	16.3068	8552.55
C. briggsae_25	C. briggsae	1	TRUE	43.5229	209.487	10.2954	15.0881	10178.9
C. briggsae_25	C. briggsae	1	TRUE	83.544	201.035	28.8455	21.1062	13525.4
C. briggsae_25	C. briggsae	1	FALSE	83.0099	218.219	28.1009	20.9086	14312.7
C. briggsae_25	C. briggsae	1	FALSE	108.262	86.7331	42.729	31.96	24113.6
C. briggsae_25	C. briggsae	1	TRUE	74.8733	210.975	21.7181	19.9128	13341.9
C. briggsae_25	C. briggsae	1	FALSE	74.6182	167.042	45.2295	20.139	11909.8
C. briggsae_25	C. briggsae	1	FALSE	158.011	300.044	44.0722	24.3053	23116.3
C. briggsae_25	C. briggsae	1	FALSE	0.695405	20.8009	4.60424	3.75688	418.929
C. briggsae_25	C. briggsae	1	TRUE	81.194	215.011	24.4177	20.255	13844.6
C. briggsae_25	C. briggsae	1	TRUE	78.4608	220.208	26.2986	19.9887	13839.1
C. briggsae_25	C. briggsae	1	TRUE	87.0221	224.952	24.4719	20.4399	14709.8
C. briggsae_25	C. briggsae	1	FALSE	169.096	362.442	38.3149	23.2501	26291
C. briggsae_25	C. briggsae	1	TRUE	71.9062	218.907	26.0455	19.1259	13328.2
C. briggsae_25	C. briggsae	1	TRUE	73.0041	219.871	24.1996	19.1213	13377
C. briggsae_25	C. briggsae	1	FALSE	8.47931	67.5654	19.6693	9.93327	2516
C. briggsae_25	C. briggsae	1	TRUE	49.8873	217.997	18.9838	15.8791	10930.4
C. briggsae_25	C. briggsae	1	TRUE	61.6432	212.126	26.8471	17.4277	11678.4
C. briggsae_25	C. briggsae	1	TRUE	45.6282	216.312	28.4756	15.1856	10528.2
C. briggsae_25	C. briggsae	1	TRUE	53.9526	203.289	24.4177	17.266	11067.8
C. briggsae_25	C. briggsae	1	FALSE	1382.7	183.152	93.9366	93.2513	73284.1
C. briggsae_25	C. briggsae	1	FALSE	5.61186	83.7042	10.2954	8.25178	2267.02
C. briggsae_25	C. briggsae	1	FALSE	13.9644	149.42	10.4233	9.81943	4921.69
C. briggsae_25	C. briggsae	1	FALSE	13.901	146.328	14.0032	10.1115	4741.79
C. briggsae_25	C. briggsae	1	FALSE	17.5221	158.455	11.8509	10.9701	5447.49
C. briggsae_25	C. briggsae	1	TRUE	28.1313	193.314	13.9083	12.5042	7862.04
C. briggsae_25	C. briggsae	1	FALSE	33.6513	172.292	22.6732	14.5079	8115.92
C. briggsae_25	C. briggsae	1	FALSE	6.12496	69.2511	10.9199	9.01069	2273.59
C. briggsae_25	C. briggsae	1	TRUE	37.3249	210.917	15.008	13.9484	9267.33
C. briggsae_25	C. briggsae	1	FALSE	49.8949	189.187	18.1998	17.4579	10600
C. briggsae_25	C. briggsae	1	TRUE	54.1431	212.324	24.7946	16.7489	11285.8
C. briggsae_25	C. briggsae	1	TRUE	43.2135	202.778	15.008	14.9947	9744.54
C. briggsae_25	C. briggsae	1	FALSE	18.1321	168.198	13.4235	10.7909	5729.48
C. briggsae_25	C. briggsae	1	FALSE	4.92023	75.9022	11.5106	7.88548	1998.49
C. briggsae_25	C. briggsae	1	FALSE	9.16247	132.41	10.4233	8.48552	3655.88
C. briggsae_25	C. briggsae	1	FALSE	37.1836	125.865	16.2784	16.9062	7567.25
C. briggsae_25	C. briggsae	1	TRUE	33.3712	216.962	17.3042	12.8167	8919.12
C. briggsae_25	C. briggsae	1	TRUE	34.2743	204.917	15.357	13.3162	8881.66
C. briggsae_25	C. briggsae	1	FALSE	35.1029	128.923	21.162	16.809	7201.37
C. briggsae_25	C. briggsae	1	FALSE	154.733	316.27	25.7385	23.1833	26995.9
C. briggsae_25	C. briggsae	1	TRUE	77.0097	215.103	26.4994	20.4757	13740.2
C. briggsae_25	C. briggsae	1	FALSE	5.84106	47.9735	16.0324	9.62776	1761.84
C. briggsae_25	C. briggsae	1	TRUE	44.2615	205.312	20.5908	15.4402	10003
C. briggsae_25	C. briggsae	1	FALSE	0.0634376	18.2434	1.62784	1.22088	110.16
C. briggsae_25	C. briggsae	1	FALSE	1.72067	38.8468	9.90179	5.49792	851.49
C. briggsae_25	C. briggsae	1	FALSE	14.2408	156.038	11.8509	9.63108	5025.39
C. briggsae_25	C. briggsae	1	FALSE	24.5577	185.267	16.0324	11.7478	7019.55
C. briggsae_25	C. briggsae	1	FALSE	4.147	75.3436	8.76621	6.96932	1800.6
C. briggsae_25	C. briggsae	1	FALSE	18.0299	174.676	15.008	10.4182	5876.29
C. briggsae_25	C. briggsae	1	TRUE	58.578	201.256	25.7385	17.5448	11405.6
C. briggsae_25	C. briggsae	1	FALSE	11.7953	133.98	11.5106	9.54357	4235.73
C. briggsae_25	C. briggsae	1	TRUE	74.3232	227.962	25.7385	18.9095	13577.2
C. briggsae_25	C. briggsae	1	FALSE	14.3231	110.145	19.6693	11.7899	4215.93
C. briggsae_25	C. briggsae	1	FALSE	62.5819	80.9439	31.3122	25.1762	8463.16
C. briggsae_25	C. briggsae	1	FALSE	371.432	484.988	38.0024	29.5928	46153.7
C. briggsae_25	C. briggsae	1	TRUE	87.9753	222.404	28.4291	20.678	14802.7
C. briggsae_25	C. briggsae	1	FALSE	1.59433	41.6017	8.76621	5.49193	883.005
C. briggsae_25	C. briggsae	1	FALSE	25.0894	121.202	22.6732	14.4689	5836.3
C. briggsae_25	C. briggsae	1	FALSE	20.5968	152.257	16.0324	11.9799	5953.6
C. briggsae_25	C. briggsae	1	FALSE	0.00855377	12.8831	0	0.542615	31.8334
C. briggsae_25	C. briggsae	1	FALSE	81.8381	234.497	26.9456	19.6915	14274.8
C. briggsae_25	C. briggsae	1	FALSE	36.7896	173.198	26.8471	14.7349	8204.09
C. briggsae_12.5	C. briggsae	1	TRUE	44.3239	201.348	17.3042	14.9087	9831.48
C. briggsae_12.5	C. briggsae	1	TRUE	44.4476	210.965	19.5341	14.8901	10072.5
C. briggsae_12.5	C. briggsae	1	FALSE	9.15036	59.9848	16.6008	11.6956	2602.08
C. briggsae_12.5	C. briggsae	1	FALSE	0.281025	16.6734	0	2.7668	230.255
C. briggsae_12.5	C. briggsae	1	FALSE	12.2938	124.963	11.7385	9.57318	4013.15
C. briggsae_12.5	C. briggsae	1	TRUE	28.1343	216.114	14.5599	12.0109	8168.83
C. briggsae_12.5	C. briggsae	1	FALSE	41.9959	186.326	18.1998	15.453	9484.18
C. briggsae_12.5	C. briggsae	1	TRUE	44.5644	211.428	24.1996	15.4475	10061.6
C. briggsae_12.5	C. briggsae	1	FALSE	24.5575	183.023	17.3042	11.7236	7027.63
C. briggsae_12.5	C. briggsae	1	FALSE	10.9206	143.083	11.7385	8.41064	4100.48
C. briggsae_12.5	C. briggsae	1	TRUE	32.3449	202.638	19.8704	13.2589	8407.59
C. briggsae_12.5	C. briggsae	1	FALSE	14.261	145.933	8.76621	9.72253	4843.98
C. briggsae_12.5	C. briggsae	1	FALSE	2.79824	52.0431	5.14769	6.0009	1234.81
C. briggsae_12.5	C. briggsae	1	TRUE	45.119	203.616	21.7181	15.3658	10090.5
C. briggsae_12.5	C. briggsae	1	FALSE	41.6825	55.997	19.8036	21.7883	7602.5
C. briggsae_12.5	C. briggsae	1	TRUE	29.2836	190.627	13.8127	12.9522	7854.21
C. briggsae_12.5	C. briggsae	1	FALSE	37.5529	190.569	22.6147	14.4553	8863.79
C. briggsae_12.5	C. briggsae	1	FALSE	11.2609	118.828	11.7385	9.78931	3882.27
C. briggsae_12.5	C. briggsae	1	TRUE	30.0491	203.963	16.1148	12.8231	8299.33
C. briggsae_12.5	C. briggsae	1	TRUE	19.4995	202.696	9.49188	10.2117	6615.34
C. briggsae_12.5	C. briggsae	1	TRUE	23.8269	195.732	15.008	11.6964	7118.71
C. briggsae_12.5	C. briggsae	1	FALSE	26.6704	159.072	13.9083	13.0987	6927.79
C. briggsae_12.5	C. briggsae	1	FALSE	27.2057	192.847	15.4431	12.6963	7618.18
C. briggsae_12.5	C. briggsae	1	FALSE	23.5269	182.825	14.7408	12.1292	6953.71
C. briggsae_12.5	C. briggsae	1	FALSE	14.4266	184.559	13.9083	9.36192	5387.95
C. briggsae_12.5	C. briggsae	1	FALSE	18.547	188.802	11.7385	10.3548	6177.37
C. briggsae_12.5	C. briggsae	1	FALSE	19.6099	183.663	11.7385	10.5237	6147.34
C. briggsae_12.5	C. briggsae	1	FALSE	12.1079	131.793	11.7385	9.88693	4242.61
C. briggsae_12.5	C. briggsae	1	FALSE	7.93107	139.398	11.5106	7.78704	3508.62
C. briggsae_12.5	C. briggsae	1	FALSE	9.98827	122.667	12.3973	9.342	3598.95
C. briggsae_12.5	C. briggsae	1	FALSE	0.864113	23.5798	5.86927	4.34497	479.432
C. briggsae_12.5	C. briggsae	1	TRUE	62.1847	208.615	21.2245	18.0728	11970.9
C. briggsae_12.5	C. briggsae	1	FALSE	62.1983	191.663	25.2709	18.7773	11596.9
C. briggsae_12.5	C. briggsae	1	TRUE	27.6766	193.406	17.9063	11.7479	7510.1
C. briggsae_12.5	C. briggsae	1	TRUE	41.4383	215.743	16.2784	14.5519	9985.02
C. briggsae_12.5	C. briggsae	1	FALSE	19.1574	158.956	14.7408	10.9072	5622.19
C. briggsae_12.5	C. briggsae	1	TRUE	34.1735	202.104	17.3042	13.7684	8878.22
C. briggsae_12.5	C. briggsae	1	TRUE	38.3632	187.569	16.6008	14.7864	8847.67
C. briggsae_12.5	C. briggsae	1	FALSE	8.62738	76.0996	16.2784	10.2172	2741.06
C. briggsae_12.5	C. briggsae	1	TRUE	31.2563	202.672	15.357	13.4899	8516.81
C. briggsae_12.5	C. briggsae	1	FALSE	1.31383	29.1376	10.4233	5.17967	646.672
C. briggsae_12.5	C. briggsae	1	TRUE	26.9405	203.953	8.76621	11.8546	7728.92
C. briggsae_12.5	C. briggsae	1	FALSE	1.809	39.7764	7.27994	5.35587	881.974
C. briggsae_12.5	C. briggsae	1	FALSE	12.8692	137.818	11.3949	10.0242	4506.06
C. briggsae_12.5	C. briggsae	1	FALSE	15.852	204.777	14.5599	9.1223	5950.78
C. briggsae_12.5	C. briggsae	1	FALSE	8.77371	46.1481	21.8398	12.1732	2194.76
C. briggsae_12.5	C. briggsae	1	TRUE	53.1105	223.324	19.6693	16.2821	11326.4
C. briggsae_12.5	C. briggsae	1	FALSE	35.1521	178.139	19.8704	14.5831	8440.13
C. briggsae_12.5	C. briggsae	1	TRUE	35.7595	202.09	16.2784	14.0733	9012.58
C. briggsae_12.5	C. briggsae	1	FALSE	15.5945	176.396	12.7139	9.76936	5486.73
C. briggsae_12.5	C. briggsae	1	FALSE	12.9046	162.78	11.8509	9.1699	4840.46
C. briggsae_12.5	C. briggsae	1	FALSE	8.65627	136.759	9.20848	8.10305	3600.09
C. briggsae_12.5	C. briggsae	1	TRUE	31.1751	208.288	21.4109	12.5371	8366.12
C. briggsae_12.5	C. briggsae	1	FALSE	42.6791	173.111	19.6693	16.3091	9103.53
C. briggsae_12.5	C. briggsae	1	TRUE	37.2076	199.465	17.6078	14.2827	9001.93
C. briggsae_12.5	C. briggsae	1	TRUE	30.5444	190.767	16.7597	13.3699	7918.99
C. briggsae_12.5	C. briggsae	1	FALSE	23.5032	169.711	15.008	11.9714	6702.73
C. briggsae_12.5	C. briggsae	1	FALSE	11.4273	89.4356	15.008	10.9763	3408.35
C. briggsae_12.5	C. briggsae	1	FALSE	10.6156	86.0642	13.4235	11.1054	3185.8
C. briggsae_12.5	C. briggsae	1	FALSE	3.54242	71.0426	9.76706	6.9568	1678.43
C. briggsae_12.5	C. briggsae	1	FALSE	8.25465	150.875	8.76621	7.68858	3736.17
C. briggsae_12.5	C. briggsae	1	FALSE	3.50821	39.1261	13.0228	8.21522	1291.73
C. briggsae_12.5	C. briggsae	1	TRUE	41.3996	215.208	21.162	14.6152	10027.1
C. briggsae_12.5	C. briggsae	1	FALSE	0.627505	39.8921	4.60424	3.26856	509.919
C. briggsae_12.5	C. briggsae	1	FALSE	1.64457	41.6835	6.51138	5.23898	869.504
C. briggsae_12.5	C. briggsae	1	FALSE	19.5464	179.733	13.0228	10.7058	6301.3
C. briggsae_12.5	C. briggsae	1	FALSE	20.7377	176.593	15.4431	11.2462	6402.02
C. briggsae_12.5	C. briggsae	1	FALSE	0.285119	16.9527	0	2.71307	234.533
C. briggsae_12.5	C. briggsae	1	FALSE	11.9131	120.085	11.5106	10.3263	4037.05
C. briggsae_12.5	C. briggsae	1	FALSE	7.75229	75.3675	13.8127	9.10288	2602.64
C. briggsae_12.5	C. briggsae	1	FALSE	26.9657	186.163	22.1411	12.3563	7301.36
C. briggsae_12.5	C. briggsae	1	TRUE	23.6622	193.069	17.9801	11.5863	7118.81
C. briggsae_12.5	C. briggsae	1	TRUE	26.3553	206.708	13.1241	12.1581	7865.32
C. briggsae_12.5	C. briggsae	1	FALSE	21.9891	157.362	16.9952	11.7487	5906.6
C. briggsae_12.5	C. briggsae	1	TRUE	40.7149	210.465	19.8704	14.907	9865.71
C. briggsae_12.5	C. briggsae	1	FALSE	5.13973	51.9852	13.1241	8.87345	1718.31
C. briggsae_12.5	C. briggsae	1	FALSE	14.1268	98.6102	17.3042	11.2911	3802.04
C. briggsae_12.5	C. briggsae	1	FALSE	40.5712	160.56	23.3072	16.056	8654.25
C. briggsae_12.5	C. briggsae	1	FALSE	0	8.47636	0	0	0
C. briggsae_12.5	C. briggsae	1	TRUE	64.2619	213.022	27.7212	18.3137	12215.6
C. briggsae_12.5	C. briggsae	1	FALSE	23.5188	134.004	16.7597	13.5645	6103.65
C. briggsae_12.5	C. briggsae	1	FALSE	47.7846	173.78	24.9012	16.9627	9415.19
C. briggsae_12.5	C. briggsae	1	FALSE	25.5056	184.14	18.5603	12.2741	7239.69
C. briggsae_12.5	C. briggsae	1	FALSE	8.14098	52.7992	18.1998	11.1745	2335.21
C. briggsae_12.5	C. briggsae	1	TRUE	55.9639	200.221	24.7946	17.6615	11190.5
C. briggsae_12.5	C. briggsae	1	FALSE	24.0357	183.475	12.7139	11.8509	6999.41
C. briggsae_12.5	C. briggsae	1	TRUE	39.7384	214.067	17.6078	14.3111	9911.2
C. briggsae_12.5	C. briggsae	1	TRUE	28.9454	201.695	16.0324	12.5937	8256.92
C. briggsae_12.5	C. briggsae	1	FALSE	41.1966	197.418	22.6732	15.3081	9431.63
C. briggsae_12.5	C. briggsae	1	TRUE	44.9759	205.87	19.0534	15.5951	10176.7
C. briggsae_12.5	C. briggsae	1	FALSE	101.621	271.658	25.2709	20.0742	17314.8
C. briggsae_12.5	C. briggsae	1	FALSE	30.4459	138.468	20.1353	14.9208	7055.76
C. briggsae_12.5	C. briggsae	1	FALSE	1.51034	41.9967	8.13922	5.13433	816.745
C. briggsae_12.5	C. briggsae	1	FALSE	22.5597	110.877	16.2784	14.6148	5376.74
C. briggsae_12.5	C. briggsae	1	TRUE	26.6083	194.22	16.3596	12.2043	7621.35
C. briggsae_12.5	C. briggsae	1	FALSE	29.6451	162.467	19.5341	13.799	7992.14
C. briggsae_12.5	C. briggsae	1	TRUE	27.5262	175.326	18.1998	13.281	7309.98
C. briggsae_12.5	C. briggsae	1	FALSE	19.1599	144.339	15.357	11.785	5422.88
C. briggsae_12.5	C. briggsae	1	TRUE	38.7794	201.545	19.6018	14.6722	9468.36
C. briggsae_12.5	C. briggsae	1	TRUE	43.1058	199.86	22.7898	15.1038	9737.63
C. briggsae_12.5	C. briggsae	1	FALSE	16.1001	184.906	9.49188	9.93044	5834.28
C. briggsae_12.5	C. briggsae	1	TRUE	41.4257	218.219	18.5603	14.8829	10025.6
C. briggsae_12.5	C. briggsae	1	TRUE	54.6569	198.651	22.1411	17.4139	11130.3
C. briggsae_12.5	C. briggsae	1	FALSE	173.176	206.429	52.9988	28.417	20304.4
C. briggsae_12.5	C. briggsae	1	TRUE	35.6087	206.058	19.0534	13.955	9167.63
C. briggsae_12.5	C. briggsae	1	TRUE	50.0437	201.791	21.2245	16.5097	10653.7
C. briggsae_12.5	C. briggsae	1	TRUE	74.5837	207.103	22.6732	20.207	13265.2
C. briggsae_12.5	C. briggsae	1	TRUE	44.6181	215.579	16.6008	15.0609	10254.1
C. briggsae_12.5	C. briggsae	1	TRUE	91.1375	212.184	31.607	21.0294	14379.8
C. briggsae_12.5	C. briggsae	1	FALSE	17.8043	99.1688	19.8036	13.6628	4480.86
C. briggsae_12.5	C. briggsae	1	FALSE	2.79121	42.8346	10.2954	7.19146	1166.51
C. briggsae_12.5	C. briggsae	1	FALSE	14.3777	79.9139	13.1241	12.2963	3629.94
C. briggsae_12.5	C. briggsae	1	FALSE	2.4603	85.4957	6.51138	5.38794	1538.45
C. briggsae_12.5	C. briggsae	1	FALSE	13.3949	153.711	13.9083	9.56067	4773.5
C. briggsae_12.5	C. briggsae	1	FALSE	6.10272	96.1106	13.0228	7.72766	2493.54
C. briggsae_12.5	C. briggsae	1	FALSE	2.69804	76.4368	6.90636	5.76522	1490.65
C. briggsae_12.5	C. briggsae	1	FALSE	10.32	165.058	8.76621	8.37229	4384.89
C. briggsae_12.5	C. briggsae	1	FALSE	2.80195	56.1705	10.2954	6.59216	1295.19
C. briggsae_12.5	C. briggsae	1	FALSE	16.319	165.396	13.1241	10.1985	5474.48
C. briggsae_12.5	C. briggsae	1	FALSE	10.1017	177.489	13.0228	7.65377	4273.66
C. briggsae_12.5	C. briggsae	1	FALSE	0.0441756	13.6152	0	1.21332	76.7403
C. briggsae_12.5	C. briggsae	1	FALSE	0.120469	13.9524	0	1.95642	138.095
C. briggsae_12.5	C. briggsae	1	TRUE	42.7219	210.556	20.1353	14.6724	9982.48
C. briggsae_12.5	C. briggsae	1	TRUE	26.3152	200.428	19.6018	11.7244	7531.42
C. briggsae_12.5	C. briggsae	1	FALSE	27.3048	167.379	21.162	13.2853	7137.62
C. briggsae_12.5	C. briggsae	1	FALSE	2.51928	37.1372	10.9199	7.11092	1036.06
C. briggsae_12.5	C. briggsae	1	FALSE	0.587204	36.1836	3.63997	3.21352	452.292
C. briggsae_12.5	C. briggsae	1	FALSE	5.11872	67.0887	11.8509	8.4317	1915.65
C. briggsae_12.5	C. briggsae	1	FALSE	17.7493	161.803	10.4233	10.384	5542.53
C. briggsae_12.5	C. briggsae	1	FALSE	0.951565	31.4397	3.25569	4.03222	562.768
C. briggsae_12.5	C. briggsae	1	FALSE	14.0148	143.713	14.7408	10.3258	4748.44
C. briggsae_12.5	C. briggsae	1	FALSE	28.8309	191.976	16.9952	12.9605	7813.74
C. briggsae_12.5	C. briggsae	1	TRUE	26.7214	190.232	16.2784	12.3652	7569.35
C. briggsae_12.5	C. briggsae	1	TRUE	26.4967	197.557	17.9063	12.2813	7595.32
C. briggsae_12.5	C. briggsae	1	FALSE	1.96242	50.8102	8.13922	5.50838	1032.51
C. briggsae_12.5	C. briggsae	1	FALSE	7.90725	69.0297	14.0032	9.90071	2445.58
C. briggsae_12.5	C. briggsae	1	FALSE	17.1343	191.976	11.3949	10.0103	6102.46
C. briggsae_12.5	C. briggsae	1	TRUE	20.2724	201.487	13.9083	10.5873	6723.01
C. briggsae_12.5	C. briggsae	1	FALSE	22.663	174.676	19.6018	11.314	6446.64
C. briggsae_12.5	C. briggsae	1	FALSE	15.3981	129.318	13.9083	11.4095	4773.35
C. briggsae_12.5	C. briggsae	1	FALSE	0.918302	20.4637	11.5106	5.0692	528.785
C. briggsae_12.5	C. briggsae	1	FALSE	1.88488	53.0545	7.27994	5.38972	1058.61
C. briggsae_12.5	C. briggsae	1	FALSE	0.389847	22.4866	3.63997	2.72998	311.818
C. briggsae_12.5	C. briggsae	1	FALSE	10.0544	108.04	11.8509	9.8875	3477.17
C. briggsae_12.5	C. briggsae	1	FALSE	8.25024	137.178	11.5106	7.77658	3428.26
C. briggsae_12.5	C. briggsae	1	FALSE	0.270627	23.103	3.63997	2.37731	255.508
C. briggsae_12.5	C. briggsae	1	FALSE	5.94073	103.923	10.4233	7.29007	2600.43
C. briggsae_12.5	C. briggsae	1	FALSE	16.0321	177.662	9.90179	9.62062	5564.33
C. briggsae_12.5	C. briggsae	1	FALSE	1.11115	30.6836	8.13922	4.64063	599.821
C. briggsae_12.5	C. briggsae	1	FALSE	14.5981	171.175	6.71177	9.64184	5258.23
C. briggsae_12.5	C. briggsae	1	FALSE	0.570144	28.2658	3.25569	3.33585	416.398
C. briggsae_12.5	C. briggsae	1	FALSE	1.79291	52.1588	8.13922	5.22067	1000.26
C. briggsae_12.5	C. briggsae	1	FALSE	0.750388	37.6139	5.86927	3.85856	533.604
C. briggsae_12.5	C. briggsae	1	FALSE	22.9806	200.197	12.3973	11.3819	7260.39
C. briggsae_12.5	C. briggsae	1	TRUE	31.7518	196.277	16.2784	13.4788	8422.67
C. briggsae_12.5	C. briggsae	1	FALSE	28.288	171.536	19.8036	13.4276	7426.58
C. briggsae_12.5	C. briggsae	1	FALSE	31.0225	192.987	20.5908	13.5338	8155.65
C. briggsae_12.5	C. briggsae	1	FALSE	18.1686	171.733	13.9083	10.4742	5864.94
C. briggsae_12.5	C. briggsae	1	FALSE	16.75	175.721	13.1241	10.2523	5703.52
C. briggsae_12.5	C. briggsae	1	FALSE	13.6644	143.188	13.1241	10.2274	4665.92
C. briggsae_12.5	C. briggsae	1	FALSE	7.03611	75.9022	13.1241	9.61522	2422.35
C. briggsae_12.5	C. briggsae	1	FALSE	0.487978	19.7895	5.14769	3.36203	340.221
C. briggsae_12.5	C. briggsae	1	FALSE	0.733252	27.9047	7.27994	3.85479	467.685
C. briggsae_12.5	C. briggsae	1	FALSE	30.746	250.809	8.13922	11.6845	9332.06
C. briggsae_12.5	C. briggsae	1	FALSE	1.32641	48.5321	6.71177	4.65425	837.071
C. briggsae_12.5	C. briggsae	1	FALSE	0.643953	23.6376	4.60424	3.45318	416.301
C. briggsae_12.5	C. briggsae	1	FALSE	19.803	183.408	13.1241	11.0425	6423.75
C. briggsae_12.5	C. briggsae	1	FALSE	10.7672	85.3081	14.0032	10.9947	3223.07
C. briggsae_12.5	C. briggsae	1	FALSE	10.3091	89.4017	14.7408	10.6287	3198.42
C. briggsae_12.5	C. briggsae	1	FALSE	10.4155	103.354	13.0228	10.3153	3477.83
C. briggsae_12.5	C. briggsae	1	FALSE	7.32631	95.9709	8.76621	8.15383	2726.85
C. briggsae_12.5	C. briggsae	1	FALSE	2.14195	49.5195	9.20848	5.60671	1054.5
C. briggsae_12.5	C. briggsae	1	FALSE	0.600166	33.4625	4.60424	3.29768	475.278
C. briggsae_12.5	C. briggsae	1	FALSE	13.1744	128.759	11.7385	10.4081	4341.39
C. briggsae_12.5	C. briggsae	1	FALSE	12.832	165.246	9.90179	9.36747	4919.81
C. briggsae_12.5	C. briggsae	1	FALSE	19.2463	134.201	16.2784	12.1625	5299.28
C. briggsae_12.5	C. briggsae	1	FALSE	19.6701	167.606	15.008	11.4207	6033.28
C. briggsae_12.5	C. briggsae	1	FALSE	59.9085	270.165	17.9801	15.3135	13304.5
C. briggsae_12.5	C. briggsae	1	FALSE	1.15061	26.0794	8.13922	4.76478	592.145
C. briggsae_12.5	C. briggsae	1	FALSE	4.80008	77.7275	12.3973	7.04828	1990.59
C. briggsae_12.5	C. briggsae	1	FALSE	6.8915	84.8313	11.5106	8.72969	2614.79
C. briggsae_12.5	C. briggsae	1	FALSE	7.57832	110.015	8.13922	7.93384	2940.35
C. briggsae_12.5	C. briggsae	1	FALSE	32.2097	174.907	16.1148	13.5893	7822.62
C. briggsae_12.5	C. briggsae	1	TRUE	25.3322	196.045	14.0032	11.8872	7528.68
C. briggsae_12.5	C. briggsae	1	TRUE	33.4651	181.64	18.5603	14.1573	8174.41
C. briggsae_12.5	C. briggsae	1	TRUE	44.7135	212.487	19.6693	15.2649	10084.2
C. briggsae_12.5	C. briggsae	1	TRUE	32.2274	199.441	15.008	13.5241	8468.41
C. briggsae_12.5	C. briggsae	1	FALSE	18.0369	166.604	14.7408	10.8919	5875.1
C. briggsae_12.5	C. briggsae	1	FALSE	3.59871	61.6705	9.49188	7.14737	1584.33
C. briggsae_12.5	C. briggsae	1	FALSE	14.0159	172.721	8.76621	9.2315	5162.9
C. briggsae_12.5	C. briggsae	1	FALSE	22.7191	161.711	16.7597	12.1866	6368
C. briggsae_12.5	C. briggsae	1	TRUE	26.3541	191.72	16.6008	12.2608	7510.34
C. briggsae_12.5	C. briggsae	1	FALSE	9.00503	95.0991	13.1241	9.62907	3142.77
C. briggsae_12.5	C. briggsae	1	FALSE	21.9866	152.223	19.0534	12.2947	6076.2
C. briggsae_12.5	C. briggsae	1	FALSE	3.1933	42.2182	11.7385	7.70973	1277.77
C. briggsae_12.5	C. briggsae	1	FALSE	0.144869	21.2777	4.88353	2.0348	174.303
C. briggsae_12.5	C. briggsae	1	FALSE	19.3697	93.8902	19.0534	14.4669	4691.96
C. briggsae_12.5	C. briggsae	1	FALSE	19.7168	146.56	11.8509	12.1938	5727.41
C. briggsae_12.5	C. briggsae	1	FALSE	16.7996	200.183	11.5106	9.50646	6171.9
C. briggsae_12.5	C. briggsae	1	FALSE	0.246304	19.173	0	2.42665	219.415
C. briggsae_12.5	C. briggsae	1	TRUE	33.4037	184.024	19.8036	14.3787	8210.42
C. briggsae_12.5	C. briggsae	1	TRUE	52.1122	198.232	21.2245	17.3374	10706.3
C. briggsae_12.5	C. briggsae	1	FALSE	8.49631	54.3113	14.6506	11.3101	2442.66
C. briggsae_12.5	C. briggsae	1	FALSE	4.80285	76.9375	8.13922	7.59337	2060.88
C. briggsae_12.5	C. briggsae	1	FALSE	18.186	147.643	17.9801	11.2667	5435.42
C. briggsae_12.5	C. briggsae	1	FALSE	2.31048	46.5671	8.13922	5.8892	1101.38
C. briggsae_12.5	C. briggsae	1	FALSE	32.7106	186.418	18.1998	13.7332	8205.48
C. briggsae_12.5	C. briggsae	1	FALSE	21.3175	148.351	16.1148	12.2839	5981.94
C. briggsae_12.5	C. briggsae	1	FALSE	46.004	313.862	17.5324	12.6155	13123.7
C. briggsae_12.5	C. briggsae	1	FALSE	32.977	162.048	23.3072	14.549	7694.14
C. briggsae_12.5	C. briggsae	1	TRUE	29.0629	192.289	14.7408	13.0401	8111.42
C. briggsae_12.5	C. briggsae	1	TRUE	57.5262	207.546	26.0963	17.581	11475.9
C. briggsae_12.5	C. briggsae	1	FALSE	44.3523	193.488	19.8704	15.5321	9822.66
C. briggsae_12.5	C. briggsae	1	TRUE	45.3714	215.801	17.3042	15.2724	10546.3
C. briggsae_12.5	C. briggsae	1	TRUE	50.4147	206.347	22.7898	16.4313	10747
C. briggsae_6.3	C. briggsae	1	TRUE	67.2769	226.95	23.3072	18.2771	12933.5
C. briggsae_6.3	C. briggsae	1	TRUE	83.2408	220.415	30.2796	20.3034	14325.9
C. briggsae_6.3	C. briggsae	1	FALSE	26.0078	187.814	15.357	12.3734	7440.19
C. briggsae_6.3	C. briggsae	1	TRUE	76.8752	215.242	27.8642	20.1641	13450.4
C. briggsae_6.3	C. briggsae	1	TRUE	40.046	210.975	16.1148	14.047	9681.03
C. briggsae_6.3	C. briggsae	1	FALSE	52.721	185.762	24.9012	17.804	10437.3
C. briggsae_6.3	C. briggsae	1	FALSE	33.3109	141.922	26.0455	14.8783	6962.23
C. briggsae_6.3	C. briggsae	1	TRUE	89.073	215.998	25.4277	20.6709	14432.9
C. briggsae_6.3	C. briggsae	1	TRUE	93.1751	217.66	30.4106	21.9445	14838.4
C. briggsae_6.3	C. briggsae	1	FALSE	39.6161	182.594	19.6018	15.5257	9043.29
C. briggsae_6.3	C. briggsae	1	TRUE	119.996	210.301	24.0348	24.6458	17194
C. briggsae_6.3	C. briggsae	1	TRUE	91.5377	230.182	26.2986	20.8373	15415.8
C. briggsae_6.3	C. briggsae	1	TRUE	80.5337	223.382	26.6986	20.0627	14275.7
C. briggsae_6.3	C. briggsae	1	TRUE	117.036	213.499	28.0065	24.8591	16855.8
C. briggsae_6.3	C. briggsae	1	FALSE	49.2977	137.504	31.3122	17.8292	8399.79
C. briggsae_6.3	C. briggsae	1	FALSE	0.027103	10.4413	0	1.08523	54.2216
C. briggsae_6.3	C. briggsae	1	TRUE	88.7801	206.732	32.9211	21.3156	14074.7
C. briggsae_6.3	C. briggsae	1	FALSE	8.65366	55.1591	19.8704	11.2962	2441.58
C. briggsae_6.3	C. briggsae	1	FALSE	0.142599	17.0106	0	1.95642	155.686
C. briggsae_6.3	C. briggsae	1	FALSE	0.504386	29.359	5.14769	3.30852	398.027
C. briggsae_6.3	C. briggsae	1	TRUE	85.2274	218.59	25.4277	20.6757	14575.1
C. briggsae_6.3	C. briggsae	1	FALSE	19.8264	44.241	28.7995	18.742	3746.75
C. briggsae_6.3	C. briggsae	1	FALSE	48.93	199.546	26.2482	16.349	10424.7
C. briggsae_6.3	C. briggsae	1	TRUE	82.8157	217.65	24.1996	20.5848	14449
C. briggsae_6.3	C. briggsae	1	FALSE	29.8613	200.115	15.008	12.9336	8187.75
C. briggsae_6.3	C. briggsae	1	FALSE	342.173	190.959	19.6693	35.4926	32062
C. briggsae_6.3	C. briggsae	1	TRUE	80.6475	215.603	26.6986	19.7435	13712.3
C. briggsae_6.3	C. briggsae	1	FALSE	32.578	201.906	14.7408	13.6576	8617.15
C. briggsae_6.3	C. briggsae	1	TRUE	105.827	229.276	30.2796	22.0941	16054.7
C. briggsae_6.3	C. briggsae	1	FALSE	1283.51	201.935	100.939	80.3455	81476.7
C. briggsae_6.3	C. briggsae	1	TRUE	34.8981	189.221	24.848	14.1484	8633.06
C. briggsae_6.3	C. briggsae	1	FALSE	35.4309	199.161	18.9838	14.2315	8921.76
C. briggsae_6.3	C. briggsae	1	FALSE	37.3531	210.975	24.4177	13.582	9148.18
C. briggsae_6.3	C. briggsae	1	TRUE	73.8325	203.871	21.162	20.4435	12952.3
C. briggsae_6.3	C. briggsae	1	FALSE	28.8778	66.7515	26.9456	20.0447	5042.89
C. briggsae_6.3	C. briggsae	1	TRUE	83.986	208.394	26.6986	21.5367	14089.1
C. briggsae_6.3	C. briggsae	1	TRUE	41.8904	191.976	16.2784	15.4937	9555.87
C. briggsae_6.3	C. briggsae	1	FALSE	92.3768	168.338	30.016	24.6723	13628.9
C. briggsae_6.3	C. briggsae	1	TRUE	90.934	207.151	35.1403	21.9188	14360.7
C. briggsae_6.3	C. briggsae	1	TRUE	27.4778	198.314	16.2784	12.3278	7908.34
C. briggsae_6.3	C. briggsae	1	TRUE	81.8012	202.383	23.7018	21.5516	13701.8
C. briggsae_6.3	C. briggsae	1	TRUE	74.3089	206.578	28.9829	19.7561	13022.6
C. briggsae_6.3	C. briggsae	1	TRUE	86.3956	207.628	26.0455	22.0654	14470.3
C. briggsae_6.3	C. briggsae	1	TRUE	75.031	200.64	26.2482	20.7483	13042.7
C. briggsae_6.3	C. briggsae	1	TRUE	75.7732	201.208	25.4277	20.1715	13407.3
C. briggsae_6.3	C. briggsae	1	TRUE	45.2395	202.86	20.1353	15.8278	10131.2
C. briggsae_6.3	C. briggsae	1	FALSE	39.8804	196.151	19.8036	14.7485	9331.51
C. briggsae_6.3	C. briggsae	1	TRUE	109.847	225.37	31.3122	23.3081	16736
C. briggsae_6.3	C. briggsae	1	TRUE	71.1895	204.825	24.9012	19.1666	12790.9
C. briggsae_6.3	C. briggsae	1	TRUE	77.8171	219.476	24.9012	20.2196	13928.4
C. briggsae_6.3	C. briggsae	1	FALSE	660.799	153.06	60.5593	55.719	95604.8
C. briggsae_6.3	C. briggsae	1	FALSE	120.675	135.044	36.3997	26.7706	19103.6
C. briggsae_6.3	C. briggsae	1	TRUE	56.5478	226.777	13.4235	16.4526	11919.8
C. briggsae_6.3	C. briggsae	1	TRUE	92.5397	224.975	26.4994	21.3067	15196
C. briggsae_6.3	C. briggsae	1	FALSE	256.58	157.897	34.3394	37.7162	24056.3
C. briggsae_6.3	C. briggsae	1	FALSE	0.388096	29.0797	3.63997	2.72149	335.431
C. briggsae_6.3	C. briggsae	1	TRUE	83.8801	212.3	23.7018	20.7089	13891.9
C. briggsae_6.3	C. briggsae	1	FALSE	0	8.13922	0	0	0
C. briggsae_6.3	C. briggsae	1	TRUE	76.1521	218.416	19.0534	20.0248	13556.7
C. briggsae_6.3	C. briggsae	1	TRUE	87.8097	217.824	26.8471	20.8578	14596.8
C. briggsae_6.3	C. briggsae	1	TRUE	104.085	222.37	34.3394	22.5898	15998.2
C. briggsae_6.3	C. briggsae	1	TRUE	93.8015	216.567	28.4291	21.7955	14901.9
C. briggsae_6.3	C. briggsae	1	FALSE	0.0317329	12.4063	0	1.08523	61.2669
C. briggsae_6.3	C. briggsae	1	FALSE	11.0212	113.063	13.0228	9.81516	3719.91
C. briggsae_6.3	C. briggsae	1	TRUE	54.4406	216.172	24.0348	16.7885	11368.6
C. briggsae_6.3	C. briggsae	1	FALSE	18.8365	86.517	20.8466	13.9407	4271.54
C. briggsae_6.3	C. briggsae	1	TRUE	88.6241	218.277	26.0455	21.2954	14670.6
C. briggsae_6.3	C. briggsae	1	TRUE	91.7881	214.766	29.3012	21.6815	14748.6
C. briggsae_6.3	C. briggsae	1	TRUE	96.6356	224.87	26.9456	22.0783	15913.9
C. briggsae_6.3	C. briggsae	1	FALSE	16.4589	79.6346	19.6018	14.2195	3942.55
C. briggsae_6.3	C. briggsae	1	TRUE	101.21	228.068	24.1996	22.564	16364.4
C. briggsae_6.3	C. briggsae	1	FALSE	1.87479	25.6844	10.9199	6.36995	780.94
C. briggsae_6.3	C. briggsae	1	FALSE	52.6131	171.849	20.1353	18.4643	10269.6
C. briggsae_6.3	C. briggsae	1	TRUE	102.109	207.965	24.1996	23.5696	15551.4
C. briggsae_6.3	C. briggsae	1	TRUE	95.9066	223.719	30.5844	22.1205	15403.1
C. briggsae_6.3	C. briggsae	1	TRUE	105.408	224.301	29.1198	23.2136	16349.3
C. briggsae_6.3	C. briggsae	1	FALSE	58.4931	147.945	28.4291	19.5662	10306.1
C. briggsae_6.3	C. briggsae	1	TRUE	92.0682	215.103	26.9456	21.6938	14616.3
C. briggsae_6.3	C. briggsae	1	TRUE	75.1393	210.243	28.0065	19.671	13153.2
C. briggsae_6.3	C. briggsae	1	FALSE	119.121	188.431	24.4177	26.1061	16328.3
C. briggsae_6.3	C. briggsae	1	TRUE	89.8274	206.684	27.7212	21.7606	14687.3
C. briggsae_6.3	C. briggsae	1	TRUE	77.4938	210.893	24.1996	19.6991	13573.6
C. briggsae_6.3	C. briggsae	1	FALSE	7.88988	58.8916	18.1998	10.2806	2326.33
C. briggsae_6.3	C. briggsae	1	FALSE	19.8892	162.92	13.1241	11.4423	6047.39
C. briggsae_6.3	C. briggsae	1	TRUE	44.0729	222.119	18.5603	14.9223	10519.4
C. briggsae_6.3	C. briggsae	1	TRUE	82.0883	217	27.6733	20.3192	14112.5
C. briggsae_6.3	C. briggsae	1	TRUE	85.3362	219.789	26.9456	20.2656	14332.8
C. briggsae_6.3	C. briggsae	1	TRUE	76.8058	222.438	27.8642	19.2383	13587.1
C. briggsae_6.3	C. briggsae	1	TRUE	98.1247	216.778	26.9456	22.8165	15674
C. briggsae_6.3	C. briggsae	1	FALSE	6.1017	38.1486	19.0534	10.6565	1710.63
C. briggsae_6.3	C. briggsae	1	FALSE	17.7114	97.5409	16.9952	13.1033	4465.41
C. briggsae_6.3	C. briggsae	1	TRUE	74.6837	217.66	24.7946	19.4973	13593.4
C. briggsae_6.3	C. briggsae	1	TRUE	88.6042	202.138	30.016	22.2957	14352
C. briggsae_6.3	C. briggsae	1	TRUE	90.4781	224.985	21.8398	21.2801	15232.6
C. briggsae_3.1	C. briggsae	1	TRUE	47.2528	207.243	22.1411	15.93	10258.4
C. briggsae_3.1	C. briggsae	1	FALSE	17.3295	173.814	10.9199	10.5627	5745.83
C. briggsae_3.1	C. briggsae	1	TRUE	39.886	206.79	18.5603	14.1825	9385.71
C. briggsae_3.1	C. briggsae	1	FALSE	34.2077	163.257	21.162	14.9071	8008.2
C. briggsae_3.1	C. briggsae	1	TRUE	33.7594	187.627	20.1353	13.857	8374.66
C. briggsae_3.1	C. briggsae	1	TRUE	37.4023	195.279	19.8036	14.2773	9000.77
C. briggsae_3.1	C. briggsae	1	FALSE	25.9943	186.721	16.3596	12.4431	7324.19
C. briggsae_3.1	C. briggsae	1	FALSE	11.2062	185.267	13.4235	8.02267	4787.61
C. briggsae_3.1	C. briggsae	1	FALSE	67.535	171.733	24.4177	20.32	11589.5
C. briggsae_3.1	C. briggsae	1	TRUE	30.4009	187.232	20.1353	13.3617	7904.84
C. briggsae_3.1	C. briggsae	1	TRUE	33.2967	195.487	22.1411	13.7011	8383.98
C. briggsae_3.1	C. briggsae	1	TRUE	62.8227	198.766	26.2986	18.531	11550.2
C. briggsae_3.1	C. briggsae	1	TRUE	40.7974	210.788	18.1998	14.444	9861.5
C. briggsae_3.1	C. briggsae	1	FALSE	15.6108	97.9937	15.008	12.8346	4374.92
C. briggsae_3.1	C. briggsae	1	FALSE	18.849	140.631	14.5599	12.1981	5528.84
C. briggsae_3.1	C. briggsae	1	FALSE	16.8019	180.571	13.4235	10.1535	5791.01
C. briggsae_3.1	C. briggsae	1	FALSE	4.5167	58.8676	11.5106	7.95805	1748.05
C. briggsae_3.1	C. briggsae	1	FALSE	0.326142	21.6966	4.88353	2.84873	272.313
C. briggsae_3.1	C. briggsae	1	FALSE	28.92	167.943	15.4431	13.8976	7410.43
C. briggsae_3.1	C. briggsae	1	FALSE	19.9764	182.233	13.9083	10.8852	6321.47
C. briggsae_3.1	C. briggsae	1	FALSE	19.3065	195.684	14.0032	10.2122	6291.23
C. briggsae_3.1	C. briggsae	1	TRUE	24.8613	174.431	14.5599	12.4005	7061.21
C. briggsae_3.1	C. briggsae	1	TRUE	55.6454	193.628	25.7385	17.5602	10681.8
C. briggsae_3.1	C. briggsae	1	TRUE	31.1207	180.152	16.7597	13.8808	8006.03
C. briggsae_3.1	C. briggsae	1	TRUE	28.1201	189.895	16.2784	12.6309	7765.38
C. briggsae_3.1	C. briggsae	1	FALSE	20.001	184.034	17.9801	11.0758	6302.46
C. briggsae_3.1	C. briggsae	1	TRUE	37.5516	208.509	14.5599	14.1714	9338.43
C. briggsae_3.1	C. briggsae	1	TRUE	48.2736	209.964	16.3596	15.6786	10507.4
C. briggsae_3.1	C. briggsae	1	TRUE	25.9164	201.29	11.5106	11.8684	7571.09
C. briggsae_3.1	C. briggsae	1	FALSE	21.4902	149.107	16.2784	12.5779	6009.47
C. briggsae_3.1	C. briggsae	1	FALSE	20.2334	159.38	3.63997	10.4941	5965.43
C. briggsae_3.1	C. briggsae	1	TRUE	31.1833	198.314	18.417	13.1651	8420.88
C. briggsae_3.1	C. briggsae	1	TRUE	51.3357	204.406	18.5603	16.8277	10828.9
C. briggsae_3.1	C. briggsae	1	FALSE	17.2896	110.935	15.008	12.4166	4701.81
C. briggsae_3.1	C. briggsae	1	FALSE	5.2414	54.7063	13.0228	8.40951	1808.05
C. briggsae_3.1	C. briggsae	1	FALSE	7.44513	157.897	6.71177	7.01699	3614.21
C. briggsae_3.1	C. briggsae	1	TRUE	64.4002	209.603	23.4771	18.5297	12154
C. briggsae_3.1	C. briggsae	1	TRUE	40.6226	200.789	19.8704	15.2057	9534.96
C. briggsae_3.1	C. briggsae	1	FALSE	17.6629	138.56	12.7139	11.8229	5350.41
C. briggsae_3.1	C. briggsae	1	FALSE	16.1613	139.398	14.6506	11.1007	5032.97
C. briggsae_3.1	C. briggsae	1	FALSE	1.05817	34.1608	8.76621	4.72344	618.68
C. briggsae_3.1	C. briggsae	1	TRUE	39.4496	199.999	20.5908	14.7779	9385.68
C. briggsae_3.1	C. briggsae	1	TRUE	31.4184	199.522	13.9083	13.063	8393.85
C. briggsae_3.1	C. briggsae	1	FALSE	20.9712	164.187	13.4235	12.082	6346.9
C. briggsae_3.1	C. briggsae	1	FALSE	30.708	175.129	13.4235	13.86	7735.95
C. briggsae_3.1	C. briggsae	1	TRUE	32.7342	214.323	17.6078	13.3525	8968.88
C. briggsae_3.1	C. briggsae	1	FALSE	25.5837	172.908	17.9063	12.8896	6964.6
C. briggsae_3.1	C. briggsae	1	TRUE	62.3775	207.243	27.2876	18.4556	12051
C. briggsae_3.1	C. briggsae	1	TRUE	78.8333	200.081	32.5975	20.2999	13175.8
C. briggsae_3.1	C. briggsae	1	FALSE	68.537	171.709	26.6986	21.055	11904.5
C. briggsae_3.1	C. briggsae	1	TRUE	37.3751	196.43	18.5603	14.453	9145.99
C. briggsae_3.1	C. briggsae	1	TRUE	33.5746	201.825	21.8398	13.2787	8531.69
C. briggsae_3.1	C. briggsae	1	FALSE	21.8381	172.721	14.5599	11.8701	6573.33
C. briggsae_3.1	C. briggsae	1	TRUE	33.746	189.698	22.7898	13.7188	8382.73
C. tropicales_25	C. tropicales	1	TRUE	47.7301	211.592	26.8471	15.658	10584.1
C. tropicales_25	C. tropicales	1	FALSE	26.0616	211.683	13.8127	11.6374	7896.85
C. tropicales_25	C. tropicales	1	TRUE	92.9111	221.893	28.7995	21.3699	15020.7
C. tropicales_25	C. tropicales	1	FALSE	2.39204	24.7308	13.1241	7.35063	904.861
C. tropicales_25	C. tropicales	1	TRUE	83.642	235.74	25.4277	19.7562	14853.1
C. tropicales_25	C. tropicales	1	TRUE	79.7598	231.579	26.0455	19.6782	14394.6
C. tropicales_25	C. tropicales	1	TRUE	88.8695	225.115	27.6733	21.1789	14914
C. tropicales_25	C. tropicales	1	FALSE	30.1813	210.301	13.4235	12.625	8458.74
C. tropicales_25	C. tropicales	1	TRUE	88.6955	243.763	26.6986	20.39	15560.4
C. tropicales_25	C. tropicales	1	TRUE	96.1079	233.775	26.4994	21.64	15757.6
C. tropicales_25	C. tropicales	1	TRUE	91.9312	199.104	24.9012	22.8801	14594.9
C. tropicales_25	C. tropicales	1	FALSE	6.27014	41.8232	17.5324	10.4689	1837.18
C. tropicales_25	C. tropicales	1	TRUE	84.7135	236.568	25.4798	19.9512	14916.4
C. tropicales_25	C. tropicales	1	TRUE	97.3169	249.938	25.7385	20.7916	16755.8
C. tropicales_25	C. tropicales	1	TRUE	89.228	235.995	26.2482	20.6009	15233.4
C. tropicales_25	C. tropicales	1	TRUE	101.594	231.742	26.2986	21.4967	15921.8
C. tropicales_25	C. tropicales	1	TRUE	94.1919	244.938	24.4177	20.6132	16130
C. tropicales_25	C. tropicales	1	TRUE	32.106	221.532	16.2784	12.642	8991.5
C. tropicales_25	C. tropicales	1	TRUE	68.9177	209.29	24.1996	19.2451	12871.1
C. tropicales_25	C. tropicales	1	TRUE	51.7769	238.321	15.4431	15.5949	11796.7
C. tropicales_25	C. tropicales	1	TRUE	90.9649	229.729	21.7181	20.7934	15403.5
C. tropicales_25	C. tropicales	1	TRUE	91.3614	230.519	25.2709	21.0099	15247.6
C. tropicales_25	C. tropicales	1	TRUE	76.2503	201.651	26.4994	20.7061	13090.5
C. tropicales_25	C. tropicales	1	TRUE	98.9921	249.485	24.848	21.404	16859.2
C. tropicales_25	C. tropicales	1	FALSE	22.5063	205.533	14.7408	10.7059	7042.22
C. tropicales_25	C. tropicales	1	FALSE	46.1045	165.757	23.136	16.3337	9050.15
C. tropicales_25	C. tropicales	1	TRUE	62.9661	241.717	23.136	16.7443	13044
C. tropicales_25	C. tropicales	1	TRUE	116.106	243.59	29.7054	22.6627	18005.7
C. tropicales_25	C. tropicales	1	TRUE	88.4874	246.903	24.4719	19.9233	15595.2
C. tropicales_25	C. tropicales	1	FALSE	81.3774	236.66	24.4177	19.5404	14882
C. tropicales_25	C. tropicales	1	TRUE	97.5844	224.566	24.9012	21.4575	15524.3
C. tropicales_25	C. tropicales	1	TRUE	75.1812	207.382	31.0999	19.9302	12956.2
C. tropicales_25	C. tropicales	1	FALSE	11.7342	131.827	13.9083	9.4631	4063.65
C. tropicales_25	C. tropicales	1	FALSE	34.1302	203.592	21.2245	13.4201	8677.8
C. tropicales_25	C. tropicales	1	TRUE	86.1093	243.311	23.0212	19.9321	15000.6
C. tropicales_25	C. tropicales	1	FALSE	59.8235	64.1362	42.449	28.6852	7581.89
C. tropicales_25	C. tropicales	1	TRUE	88.6092	216.615	36.7258	20.6104	14363.5
C. tropicales_25	C. tropicales	1	TRUE	81.8474	225.741	22.8479	20.1015	14457.4
C. tropicales_25	C. tropicales	1	TRUE	78.5803	239.776	23.3072	18.9861	14304.8
C. tropicales_25	C. tropicales	1	FALSE	66.2069	202.465	32.5975	18.6621	12337
C. tropicales_25	C. tropicales	1	TRUE	95.9555	234.415	26.4994	21.2282	15518.2
C. tropicales_25	C. tropicales	1	TRUE	80.3651	240.113	24.9012	19.3836	14753.1
C. tropicales_25	C. tropicales	1	TRUE	76.1117	243.648	24.9012	18.543	14112.5
C. tropicales_25	C. tropicales	1	TRUE	93.5834	256.623	27.7212	20.469	16640.5
C. tropicales_25	C. tropicales	1	TRUE	56.4882	223.415	16.2784	16.523	11910.9
C. tropicales_25	C. tropicales	1	FALSE	58.8704	61.497	43.0995	28.4423	7529.45
C. tropicales_25	C. tropicales	1	FALSE	94.9164	206.279	26.0963	22.1373	14448.1
C. tropicales_25	C. tropicales	1	TRUE	95.255	219.23	28.0065	22.5199	15407.5
C. tropicales_25	C. tropicales	1	TRUE	64.4655	206.568	26.2482	18.9007	12297.9
C. tropicales_25	C. tropicales	1	TRUE	87.8331	203.139	30.016	21.9066	14214.6
C. tropicales_25	C. tropicales	1	FALSE	22.0122	62.648	24.6337	17.7062	4350
C. tropicales_25	C. tropicales	1	TRUE	82.5356	230.823	24.4177	19.9986	14641.1
C. tropicales_25	C. tropicales	1	TRUE	69.3258	232.113	27.8642	18.25	13314.7
C. tropicales_25	C. tropicales	1	FALSE	30.5364	206.463	18.1998	12.5175	8296.7
C. tropicales_25	C. tropicales	1	FALSE	39.363	204.767	17.5324	14.2671	9445.22
C. tropicales_25	C. tropicales	1	TRUE	70.2931	226.637	26.8471	18.1916	13399
C. tropicales_25	C. tropicales	1	TRUE	112.911	241.543	25.7385	23.2066	17574.2
C. tropicales_25	C. tropicales	1	FALSE	20.6267	197.22	16.2784	10.623	6543.52
C. tropicales_25	C. tropicales	1	FALSE	44.4464	192.048	18.1998	15.958	9780.92
C. tropicales_25	C. tropicales	1	TRUE	58.0649	226.103	17.9801	16.8191	12125.7
C. tropicales_25	C. tropicales	1	TRUE	74.5321	233.346	26.0963	18.524	13566
C. tropicales_25	C. tropicales	1	TRUE	80.0739	245.391	21.8398	19.1088	14726
C. tropicales_25	C. tropicales	1	TRUE	58.6372	210.074	24.848	17.6567	11797.3
C. tropicales_25	C. tropicales	1	TRUE	95.1602	247.019	26.2482	21.159	16240.4
C. tropicales_25	C. tropicales	1	FALSE	21.1036	194.046	15.008	10.9676	6818.5
C. tropicales_25	C. tropicales	1	FALSE	27.8527	199.999	13.0228	12.2925	7857.93
C. tropicales_25	C. tropicales	1	FALSE	32.5375	196.965	15.357	13.5693	8578.3
C. tropicales_25	C. tropicales	1	FALSE	0.173205	14.7663	0	2.30212	170.633
C. tropicales_12.5	C. tropicales	1	TRUE	93.5553	241.37	30.8862	20.8238	15810.3
C. tropicales_12.5	C. tropicales	1	TRUE	120.328	238.938	26.4994	24.0643	18147.2
C. tropicales_12.5	C. tropicales	1	TRUE	111.424	262.484	28.4291	22.2678	17984.8
C. tropicales_12.5	C. tropicales	1	TRUE	109.594	247.472	29.3464	22.2398	17334.9
C. tropicales_12.5	C. tropicales	1	TRUE	76.5641	241.403	19.0534	18.2993	13882.4
C. tropicales_12.5	C. tropicales	1	TRUE	123.058	263.437	30.4106	22.7904	19077.5
C. tropicales_12.5	C. tropicales	1	TRUE	95.2309	231.357	27.2876	21.2926	15754.4
C. tropicales_12.5	C. tropicales	1	TRUE	125.466	214.149	27.7212	25.7583	17805.6
C. tropicales_12.5	C. tropicales	1	TRUE	109.736	254.402	26.2482	22.2701	17973.4
C. tropicales_12.5	C. tropicales	1	TRUE	105.967	245.637	27.6254	21.9323	17068
C. tropicales_12.5	C. tropicales	1	TRUE	75.2479	243.181	25.4798	18.2656	14190
C. tropicales_12.5	C. tropicales	1	TRUE	91.5947	222.033	34.4934	21.2892	14786.6
C. tropicales_12.5	C. tropicales	1	FALSE	41.3551	226.358	20.3968	14.3376	10178.5
C. tropicales_12.5	C. tropicales	1	TRUE	83.2015	223.892	23.3072	20.3049	14481.5
C. tropicales_12.5	C. tropicales	1	FALSE	30.4598	201.882	16.7597	12.5176	8167.12
C. tropicales_12.5	C. tropicales	1	TRUE	75.6036	234.391	25.2709	18.8089	14079.5
C. tropicales_12.5	C. tropicales	1	FALSE	2.0155	26.638	16.9952	6.82264	839.625
C. tropicales_12.5	C. tropicales	1	TRUE	129.15	256.17	31.607	24.1538	19163.4
C. tropicales_12.5	C. tropicales	1	FALSE	63.0814	66.0533	43.9819	28.7697	7861.13
C. tropicales_12.5	C. tropicales	1	TRUE	82.43	250.612	24.9012	19.31	15244.9
C. tropicales_12.5	C. tropicales	1	FALSE	0.821741	18.9755	0	4.47451	463.938
C. tropicales_12.5	C. tropicales	1	FALSE	93.6448	235.253	29.3464	21.043	15633.2
C. tropicales_12.5	C. tropicales	1	TRUE	106.137	234.276	23.4771	22.9765	17169.6
C. tropicales_12.5	C. tropicales	1	TRUE	121.146	250.762	27.8166	23.0426	18400.1
C. tropicales_12.5	C. tropicales	1	FALSE	57.7891	226.464	18.5603	17.3842	12353.7
C. tropicales_12.5	C. tropicales	1	TRUE	105.312	244.264	22.6732	22.0471	17034.3
C. tropicales_12.5	C. tropicales	1	TRUE	114.396	235.311	27.7212	22.7716	17544.3
C. tropicales_12.5	C. tropicales	1	TRUE	111.957	244.182	28.4291	22.6995	17600.6
C. tropicales_12.5	C. tropicales	1	FALSE	98.3706	223.637	30.016	22.0482	15802.1
C. tropicales_12.5	C. tropicales	1	FALSE	59.1156	222.939	19.6693	16.4999	11422.4
C. tropicales_12.5	C. tropicales	1	TRUE	82.5817	236.101	27.8642	19.6448	14636.6
C. tropicales_12.5	C. tropicales	1	TRUE	85.5879	223.382	26.0963	20.9741	14589.6
C. tropicales_12.5	C. tropicales	1	TRUE	118.528	233.568	30.2796	23.8895	17804.2
C. tropicales_12.5	C. tropicales	1	TRUE	83.1338	219.336	26.0455	20.1724	14231
C. tropicales_6.3	C. tropicales	1	FALSE	34.578	172.942	16.9952	14.643	8426.59
C. tropicales_6.3	C. tropicales	1	TRUE	102.256	254.658	28.4756	21.3919	17127.3
C. tropicales_6.3	C. tropicales	1	FALSE	0.222636	17.8245	0	2.42665	201.617
C. tropicales_6.3	C. tropicales	1	FALSE	32.564	218.277	16.6008	13.1387	8895.2
C. tropicales_6.3	C. tropicales	1	TRUE	48.0994	221.812	20.1353	15.645	10976
C. tropicales_6.3	C. tropicales	1	FALSE	77.3224	219.172	22.6147	19.4497	13995.2
C. tropicales_6.3	C. tropicales	1	TRUE	88.237	236.462	26.0963	20.439	15548.8
C. tropicales_6.3	C. tropicales	1	TRUE	106.001	244.033	31.0999	22.325	17171.2
C. tropicales_6.3	C. tropicales	1	FALSE	68.4301	230.625	22.6147	18.0471	13489.8
C. tropicales_6.3	C. tropicales	1	TRUE	80.1204	242.868	28.4756	18.9159	14669
C. tropicales_6.3	C. tropicales	1	TRUE	107.64	253.925	29.3012	22.1476	17617.4
C. tropicales_6.3	C. tropicales	1	TRUE	75.0825	234.776	18.9838	18.5258	14226
C. tropicales_6.3	C. tropicales	1	TRUE	115.78	243.345	29.7054	23.0511	17988.6
C. tropicales_6.3	C. tropicales	1	TRUE	98.593	239.881	26.9456	21.2778	16281.1
C. tropicales_6.3	C. tropicales	1	FALSE	7.58617	84.6578	11.5106	9.30359	2740.5
C. tropicales_6.3	C. tropicales	1	FALSE	361.451	212.184	22.7898	37.9783	33478.8
C. tropicales_6.3	C. tropicales	1	TRUE	79.646	229.917	30.016	19.3549	14536.9
C. tropicales_6.3	C. tropicales	1	TRUE	65.0176	246.995	26.8471	17.1906	13251.2
C. tropicales_6.3	C. tropicales	1	TRUE	90.1375	225.033	26.0455	21.0821	15161.7
C. tropicales_6.3	C. tropicales	1	FALSE	91.5336	231.323	27.0927	21.2994	15501
C. tropicales_6.3	C. tropicales	1	FALSE	53.8286	206.882	24.848	16.7124	11073.7
C. tropicales_6.3	C. tropicales	1	FALSE	84.8325	237.252	20.8466	20.1538	15080.4
C. tropicales_6.3	C. tropicales	1	TRUE	66.3672	229.671	24.848	17.4268	12898.9
C. tropicales_6.3	C. tropicales	1	TRUE	94.8321	248.637	24.4177	20.7367	16431
C. tropicales_6.3	C. tropicales	1	TRUE	67.033	230.659	25.3233	17.9049	13029.3
C. tropicales_6.3	C. tropicales	1	TRUE	87.0202	229.392	23.7018	20.7811	14865.5
C. tropicales_6.3	C. tropicales	1	TRUE	102.974	242.112	29.3464	21.954	16486.4
C. tropicales_6.3	C. tropicales	1	FALSE	4.87862	37.8932	9.76706	9.1648	1565.5
C. tropicales_6.3	C. tropicales	1	TRUE	53.4292	233.149	19.6693	16.1376	11827.3
C. tropicales_6.3	C. tropicales	1	FALSE	40.8881	222.125	19.8704	14.5879	10034.2
C. tropicales_6.3	C. tropicales	1	TRUE	95.7613	244.948	26.6986	21.057	16262.1
C. tropicales_6.3	C. tropicales	1	TRUE	114.316	257.065	20.8466	22.2374	18077.9
C. tropicales_6.3	C. tropicales	1	FALSE	61.1228	225.299	23.136	17.6766	12599.2
C. tropicales_6.3	C. tropicales	1	TRUE	78.8282	236.52	24.4177	19.6432	14405
C. tropicales_6.3	C. tropicales	1	FALSE	61.1227	215.276	24.0348	17.3826	12173.5
C. tropicales_6.3	C. tropicales	1	TRUE	85.3358	240.729	18.1998	19.531	15151.9
C. tropicales_6.3	C. tropicales	1	TRUE	82.9036	222.905	26.4994	20.3683	14243.9
C. tropicales_6.3	C. tropicales	1	FALSE	33.7124	221.161	19.0534	13.2957	9084.83
C. tropicales_6.3	C. tropicales	1	TRUE	55.8804	219.697	22.7898	16.7189	11711.9
C. tropicales_6.3	C. tropicales	1	TRUE	85.9864	225.881	26.4994	20.3283	14520.7
C. tropicales_6.3	C. tropicales	1	TRUE	94.4654	237.589	31.607	20.8984	15613.4
C. tropicales_6.3	C. tropicales	1	TRUE	44.3726	229.137	16.2784	14.5783	10801.2
C. tropicales_6.3	C. tropicales	1	TRUE	101.751	235.648	29.9275	21.72	16471.3
C. tropicales_6.3	C. tropicales	1	TRUE	74.752	233.799	27.2876	18.9074	14049.4
C. tropicales_6.3	C. tropicales	1	TRUE	94.9563	244.857	32.7193	20.8356	15740.3
C. tropicales_6.3	C. tropicales	1	FALSE	3.49011	52.1827	8.13922	7.18523	1418.68
C. tropicales_6.3	C. tropicales	1	FALSE	38.2234	122.224	24.0348	16.7588	7308.04
C. tropicales_6.3	C. tropicales	1	TRUE	90.9127	247.751	21.4109	20.2115	15657.9
C. tropicales_6.3	C. tropicales	1	TRUE	98.5859	249.808	20.3968	21.232	17056.4
C. tropicales_6.3	C. tropicales	1	TRUE	103.902	233.683	28.8455	22.5994	16616
C. tropicales_6.3	C. tropicales	1	FALSE	15.4063	85.1346	23.0212	11.9706	3724.4
C. tropicales_6.3	C. tropicales	1	TRUE	84.4492	264.612	21.4109	19.1045	15623.4
C. tropicales_6.3	C. tropicales	1	TRUE	82.0473	256.228	19.6693	18.8256	14936.6
C. tropicales_6.3	C. tropicales	1	TRUE	103.862	242.275	31.4389	21.9564	16714.5
C. tropicales_6.3	C. tropicales	1	FALSE	11.2441	65.4608	18.1998	11.7848	2958.69
C. tropicales_6.3	C. tropicales	1	TRUE	86.3031	250.077	24.9012	19.6958	15690.6
C. tropicales_6.3	C. tropicales	1	FALSE	27.5657	108.994	16.0324	16.1941	6326.89
C. tropicales_6.3	C. tropicales	1	FALSE	19.8896	138.892	28.8455	12.1719	5818.74
C. tropicales_6.3	C. tropicales	1	FALSE	22.4505	160.189	16.2784	12.1922	6254.29
C. tropicales_6.3	C. tropicales	1	FALSE	0.996295	30.9051	4.88353	4.39003	580.162
C. tropicales_6.3	C. tropicales	1	FALSE	33.1801	227.321	15.4431	13.0066	9254.41
C. tropicales_6.3	C. tropicales	1	FALSE	16.5647	123.028	16.9952	11.5818	4754.82
C. tropicales_6.3	C. tropicales	1	FALSE	5.54815	59.9609	13.9083	9.17607	1904.99
C. tropicales_6.3	C. tropicales	1	FALSE	5.1635	48.5899	10.4233	8.72595	1751.88
C. tropicales_6.3	C. tropicales	1	FALSE	24.7698	116.632	22.7898	14.3678	5605.9
C. tropicales_6.3	C. tropicales	1	FALSE	41.9571	201.348	24.9012	14.8847	9697.46
C. tropicales_6.3	C. tropicales	1	FALSE	33.3747	201.15	18.1998	13.4062	8651.63
C. tropicales_6.3	C. tropicales	1	FALSE	2.4559	48.9031	9.20848	5.79705	1122.4
C. tropicales_6.3	C. tropicales	1	FALSE	13.1158	90.4949	14.7408	12.1213	3616.62
C. tropicales_6.3	C. tropicales	1	TRUE	34.1419	229.729	16.0324	13.1636	9348.99
C. tropicales_6.3	C. tropicales	1	FALSE	57.5187	282.191	14.5599	15.0612	14038.6
C. tropicales_6.3	C. tropicales	1	FALSE	73.9606	216.162	21.162	18.6045	12860.6
C. tropicales_6.3	C. tropicales	1	TRUE	110.582	245.671	32.9211	22.5745	17148.8
C. tropicales_6.3	C. tropicales	1	FALSE	55.5172	209.603	23.4771	17.1429	11314.5
C. tropicales_6.3	C. tropicales	1	TRUE	46.4295	234.984	12.7139	15.1523	11034.6
C. tropicales_6.3	C. tropicales	1	FALSE	2.03611	53.4734	5.14769	5.71523	1097.59
C. tropicales_6.3	C. tropicales	1	FALSE	10.4696	36.8818	27.8166	13.4745	2399.09
C. tropicales_6.3	C. tropicales	1	TRUE	94.9449	224.87	21.7181	21.9825	15541.4
C. tropicales_6.3	C. tropicales	1	FALSE	15.2032	89.0984	16.7597	12.853	3897.11
C. tropicales_6.3	C. tropicales	1	FALSE	0.477283	17.4055	0	3.47443	325.391
C. tropicales_6.3	C. tropicales	1	FALSE	2.58858	64.7047	7.27994	5.73627	1377.25
C. tropicales_6.3	C. tropicales	1	FALSE	18.734	89.7967	24.0348	13.9298	4326.47
C. tropicales_6.3	C. tropicales	1	FALSE	46.2483	202.441	24.0348	15.856	10187.6
C. tropicales_6.3	C. tropicales	1	FALSE	30.6915	208.264	15.4431	12.9218	8535.22
C. tropicales_6.3	C. tropicales	1	TRUE	56.8112	229.392	22.7898	17.2346	12190.3
C. tropicales_6.3	C. tropicales	1	FALSE	42.9314	230.057	21.4109	14.2909	10648.2
C. tropicales_6.3	C. tropicales	1	TRUE	38.4222	219.731	16.7597	14.0825	9611.9
C. tropicales_6.3	C. tropicales	1	FALSE	7.32424	72.6225	11.5106	9.05706	2441.15
C. tropicales_6.3	C. tropicales	1	FALSE	26.5352	191.465	14.5599	12.4667	7506.56
C. tropicales_6.3	C. tropicales	1	FALSE	16.4221	157.155	13.0228	10.8253	5448.01
C. tropicales_6.3	C. tropicales	1	FALSE	0.77861	33.9393	5.14769	3.82788	535.334
C. tropicales_6.3	C. tropicales	1	FALSE	21.7298	184.954	12.7139	11.4521	6731.09
C. tropicales_6.3	C. tropicales	1	TRUE	81.3837	240.614	17.5324	19.3861	14684.3
C. tropicales_6.3	C. tropicales	1	FALSE	50.9708	215.16	22.8479	16.4277	11185.8
C. tropicales_6.3	C. tropicales	1	FALSE	21.2679	170.058	15.008	11.5762	6333.78
C. tropicales_6.3	C. tropicales	1	FALSE	35.888	200.157	16.6008	14.3538	8942.27
C. tropicales_6.3	C. tropicales	1	FALSE	25.9775	210.137	14.7408	11.8296	7730.6
C. tropicales_6.3	C. tropicales	1	TRUE	99.2395	243.995	24.1996	21.6324	16545.7
C. tropicales_6.3	C. tropicales	1	TRUE	85.3583	218.811	22.7898	20.7418	14451.8
C. tropicales_6.3	C. tropicales	1	FALSE	0.121424	11.5924	0	2.17046	134.699
C. tropicales_6.3	C. tropicales	1	TRUE	108.5	244.577	30.7141	22.2504	17240.1
C. tropicales_6.3	C. tropicales	1	TRUE	109.396	228.824	42.449	22.4738	16021.7
C. tropicales_6.3	C. tropicales	1	TRUE	37.1121	236.693	15.008	13.3896	10033.8
C. tropicales_6.3	C. tropicales	1	FALSE	125.536	202.172	31.2699	26.0528	17986.3
C. tropicales_6.3	C. tropicales	1	TRUE	101.742	245.343	24.7946	21.5367	16510.4
C. tropicales_6.3	C. tropicales	1	TRUE	86.3717	195.14	31.0999	21.1737	13549.6
C. tropicales_6.3	C. tropicales	1	FALSE	11.7854	75.7625	17.6078	11.9961	3107.33
C. tropicales_6.3	C. tropicales	1	FALSE	6.65214	62.0316	14.7408	9.8588	2123.61
C. tropicales_3.1	C. tropicales	1	TRUE	37.1973	210.335	16.1148	14.1525	9394.15
C. tropicales_3.1	C. tropicales	1	FALSE	1.23051	21.138	8.13922	5.21327	597.141
C. tropicales_3.1	C. tropicales	1	FALSE	879.945	216.167	23.0212	54.3981	79802.7
C. tropicales_3.1	C. tropicales	1	TRUE	86.4317	230.88	32.2297	20.1842	15071.6
C. tropicales_3.1	C. tropicales	1	FALSE	125.378	195.814	29.3464	26.8776	17687.6
C. tropicales_3.1	C. tropicales	1	TRUE	100.301	223.405	30.7141	22.2095	15923.8
C. tropicales_3.1	C. tropicales	1	TRUE	127.321	250.915	34.9513	23.4454	18765.8
C. tropicales_3.1	C. tropicales	1	FALSE	0.457317	17.9641	0	3.4318	314.251
C. tropicales_3.1	C. tropicales	1	TRUE	79.7699	231.868	26.2482	19.6556	14344.7
C. tropicales_3.1	C. tropicales	1	FALSE	433.57	201.68	26.2482	44.0457	36466.9
C. tropicales_3.1	C. tropicales	1	FALSE	38.4284	190.93	16.0324	14.8543	9030.94
C. tropicales_3.1	C. tropicales	1	FALSE	48.2122	212.603	19.5341	15.7067	10506.3
C. tropicales_3.1	C. tropicales	1	FALSE	16.5336	158.152	11.7385	10.4409	5413.76
C. tropicales_3.1	C. tropicales	1	FALSE	13.3736	97.6566	15.357	11.4736	3876.43
C. tropicales_3.1	C. tropicales	1	TRUE	118.618	228.8	25.7385	23.0719	17192.2
C. tropicales_3.1	C. tropicales	1	TRUE	66.6247	211.626	16.6008	18.7275	12659.3
C. tropicales_3.1	C. tropicales	1	TRUE	94.2094	232.253	27.6254	21.1909	15538.5
C. tropicales_3.1	C. tropicales	1	TRUE	109.903	247.356	32.4346	22.6078	17397.9
C. tropicales_3.1	C. tropicales	1	TRUE	113.617	248.252	30.929	22.4525	17562.5
C. tropicales_3.1	C. tropicales	1	FALSE	49.7688	61.6465	42.6048	26.605	6711.05
C. tropicales_3.1	C. tropicales	1	FALSE	35.6443	176.222	23.136	14.9041	8330.95
C. tropicales_3.1	C. tropicales	1	TRUE	84.7267	239.776	31.0999	19.8446	15182.6
C. tropicales_3.1	C. tropicales	1	FALSE	2.01261	27.1726	13.1241	6.78183	811.751
C. tropicales_3.1	C. tropicales	1	FALSE	23.825	195.14	16.3596	11.519	7245.41
C. tropicales_3.1	C. tropicales	1	FALSE	9.92521	123.62	6.71177	8.38242	3475.35
C. tropicales_3.1	C. tropicales	1	TRUE	79.5694	217.882	23.3072	20.2932	13923.9
C. tropicales_3.1	C. tropicales	1	TRUE	92.58	210.022	23.4771	22.0799	15203.1
C. tropicales_3.1	C. tropicales	1	TRUE	112.059	219.428	23.3072	23.7792	16540.2
C. tropicales_3.1	C. tropicales	1	TRUE	102.251	241.254	27.7212	22.1404	16803.3
C. tropicales_3.1	C. tropicales	1	TRUE	82.4606	228.323	28.7995	19.8704	14451.9
C. tropicales_3.1	C. tropicales	1	TRUE	98.4483	232.369	25.4798	21.5697	16251.7
C. tropicales_3.1	C. tropicales	1	TRUE	85.0629	217.487	21.162	20.7161	14577.4
C. tropicales_3.1	C. tropicales	1	TRUE	134.902	240.542	33.8732	24.8208	19048.9
C. tropicales_3.1	C. tropicales	1	TRUE	71.6616	242.169	26.4994	18.4001	14072.8
C. tropicales_3.1	C. tropicales	1	FALSE	21.4381	122.633	14.7408	13.5066	5565.89
C. tropicales_3.1	C. tropicales	1	TRUE	72.491	214.173	20.8466	19.1739	12967
C. tropicales_3.1	C. tropicales	1	TRUE	97.5238	259.96	20.5908	20.4263	17023.2
C. tropicales_3.1	C. tropicales	1	FALSE	99.4629	143.829	26.6986	23.6868	16196.9
C. tropicales_3.1	C. tropicales	1	FALSE	97.4007	194.384	33.5194	24.2564	15250.3
C. tropicales_3.1	C. tropicales	1	TRUE	46.5271	206.034	23.4771	15.8934	10216.2
C. tropicales_3.1	C. tropicales	1	TRUE	93.9151	206.371	29.8832	22.4414	14688.6
C. tropicales_3.1	C. tropicales	1	TRUE	88.574	222.486	29.4815	21.211	14758.8
C. tropicales_3.1	C. tropicales	1	TRUE	83.9993	231.357	25.4798	19.9777	14914.3
C. tropicales_3.1	C. tropicales	1	TRUE	97.0514	221.311	27.6733	22.1527	15524.3
C. tropicales_3.1	C. tropicales	1	TRUE	93.3496	225.173	25.4277	21.5506	15662.7
C. tropicales_3.1	C. tropicales	1	TRUE	88.1309	227.601	29.9275	19.9495	14614.2
C. tropicales_3.1	C. tropicales	1	TRUE	50.6744	210.277	22.6732	16.6221	10972.3
C. tropicales_3.1	C. tropicales	1	TRUE	84.2738	238.914	25.7385	19.1947	14744.3
C. tropicales_3.1	C. tropicales	1	FALSE	64.9341	176.651	25.2709	19.6166	11667.8
C. tropicales_3.1	C. tropicales	1	TRUE	70.5399	220.299	23.4771	18.9257	13197.2
C. tropicales_3.1	C. tropicales	1	TRUE	87.294	214.847	27.6733	21.7279	14521.6
C. tropicales_3.1	C. tropicales	1	TRUE	93.3589	214.009	25.4798	21.7964	15015.3
C. tropicales_3.1	C. tropicales	1	TRUE	79.6019	225.183	28.0065	19.6859	14247
C. tropicales_3.1	C. tropicales	1	FALSE	33.4977	184.872	20.8466	14.0084	8187.21
C. tropicales_3.1	C. tropicales	1	TRUE	78.6275	223.637	21.2245	19.6152	13914.6
C. tropicales_3.1	C. tropicales	1	TRUE	82.863	225.207	24.1996	20.1988	14342.3
C. tropicales_3.1	C. tropicales	1	TRUE	75.0139	233.52	18.1998	19.2744	14231.6
C. tropicales_3.1	C. tropicales	1	FALSE	60.6758	154.757	28.0065	20.6801	10474.9
C. tropicales_3.1	C. tropicales	1	TRUE	92.4581	228.159	30.016	21.3635	15619.3
C. tropicales_3.1	C. tropicales	1	TRUE	101.503	238.962	30.016	21.5169	16465.2
C. tropicales_3.1	C. tropicales	1	FALSE	19.5961	212.661	8.76621	9.99191	6753.18
C. tropicales_3.1	C. tropicales	1	FALSE	20.3488	180.383	17.9801	11.0931	6365.9
C. tropicales_3.1	C. tropicales	1	FALSE	29.6196	214.66	16.2784	12.4707	8426.22
C. tropicales_3.1	C. tropicales	1	TRUE	99.1086	233.891	26.2986	21.8251	16360.9
C. tropicales_3.1	C. tropicales	1	TRUE	49.7313	220.81	23.136	15.4046	10936.4
C. tropicales_3.1	C. tropicales	1	TRUE	89.7298	245.078	30.016	20.009	15652.1
C. tropicales_3.1	C. tropicales	1	TRUE	82.2721	243.089	26.8471	19.8177	14923.8
C. tropicales_3.1	C. tropicales	1	TRUE	96.2973	245.647	24.6337	20.9093	16028.5
C. tropicales_3.1	C. tropicales	1	TRUE	85.1339	236.881	21.162	20.0247	15022.7
C. tropicales_3.1	C. tropicales	1	TRUE	97.1475	254.065	26.6986	20.8481	16595.5
C. tropicales_3.1	C. tropicales	1	FALSE	9.10994	80.8675	11.5106	10.5481	2888.23
C. tropicales_3.1	C. tropicales	1	FALSE	24.9268	174.792	18.9838	12.5022	6907.71
C. tropicales_3.1	C. tropicales	1	TRUE	78.1294	226.127	26.9456	19.3284	13809.4
C. tropicales_3.1	C. tropicales	1	FALSE	1.58374	22.2891	8.13922	5.7868	698.131
C. tropicales_3.1	C. tropicales	1	FALSE	287.513	209.15	19.6693	29.0226	46212.6
C. tropicales_3.1	C. tropicales	1	TRUE	82.564	222.741	29.9275	20.3434	14513.5
C. tropicales_3.1	C. tropicales	1	TRUE	74.7517	244.857	22.1411	18.9331	14366.4
C. tropicales_3.1	C. tropicales	1	TRUE	84.5678	243.682	24.4177	19.6651	15140.7
C. tropicales_3.1	C. tropicales	1	FALSE	32.8633	226.498	14.6506	12.8379	9245.92
C. tropicales_3.1	C. tropicales	1	TRUE	86.6739	236.322	23.3072	19.9181	15067.9
C. tropicales_3.1	C. tropicales	1	TRUE	74.2422	228.241	22.6732	18.6823	13232.3
C. tropicales_3.1	C. tropicales	1	TRUE	73.2442	223.16	26.4994	18.9583	13733.6
C. tropicales_3.1	C. tropicales	1	TRUE	65.9009	218.787	21.9004	17.7613	12591.9
C. tropicales_3.1	C. tropicales	1	TRUE	119.37	216.846	22.6732	24.3623	17124.9
C. tropicales_3.1	C. tropicales	1	TRUE	90.7989	226.31	28.8455	21.5115	15391.7
C. tropicales_3.1	C. tropicales	1	TRUE	53.574	245.926	16.9952	15.5002	12202.4
C. tropicales_3.1	C. tropicales	1	TRUE	54.5327	220.998	22.1411	16.5173	11665.6
C. tropicales_3.1	C. tropicales	1	TRUE	122.854	240.508	29.8832	23.4098	18033.9
C. tropicales_3.1	C. tropicales	1	FALSE	29.7609	187.29	18.1998	12.6055	7786.79
C. tropicales_3.1	C. tropicales	1	TRUE	114.966	247.356	27.6733	23.4361	17686.9
C. tropicales_3.1	C. tropicales	1	FALSE	99.2528	181.977	55.3467	22.3443	17808.9
C. tropicales_3.1	C. tropicales	1	TRUE	79.1404	221.359	25.3233	20.1858	14145.6
C. tropicales_3.1	C. tropicales	1	TRUE	63.3013	224.533	27.2876	17.5871	12282.5
C. tropicales_3.1	C. tropicales	1	TRUE	81.9728	235.927	19.5341	19.2481	14506.2
C. tropicales_3.1	C. tropicales	1	TRUE	63.481	221.532	24.4177	17.0966	12166.4
C. tropicales_3.1	C. tropicales	1	TRUE	31.8517	219.591	12.3973	12.7304	8861.53
C. tropicales_3.1	C. tropicales	1	TRUE	101.203	236.404	23.0212	21.5466	16153.9
C. tropicales_3.1	C. tropicales	1	TRUE	60.1934	232.229	16.6008	16.9814	12660.1
C. tropicales_3.1	C. tropicales	1	FALSE	61.8544	96.7369	11.7385	21.0312	8558.12
C. tropicales_3.1	C. tropicales	1	TRUE	84.6723	219.847	25.4798	20.5025	14738.5
C. tropicales_3.1	C. tropicales	1	TRUE	48.792	220.405	18.5603	15.6732	11018.8
C. tropicales_3.1	C. tropicales	1	FALSE	61.3797	221.522	26.2482	17.1505	12363.5
C. tropicales_1.6	C. tropicales	1	FALSE	28.7994	189.558	15.008	12.7163	7818.39
C. tropicales_1.6	C. tropicales	1	FALSE	21.1062	179.232	18.417	11.2502	6410.41
C. tropicales_1.6	C. tropicales	1	FALSE	15.1869	141.084	11.5106	10.6283	4878.2
C. tropicales_1.6	C. tropicales	1	FALSE	25.8674	177.628	21.2245	12.493	7128.7
C. tropicales_1.6	C. tropicales	1	TRUE	80.6731	226.194	24.6337	19.9965	14501.4
C. tropicales_1.6	C. tropicales	1	TRUE	71.8673	206.963	28.7995	19.6253	12804.2
C. tropicales_1.6	C. tropicales	1	TRUE	70.4848	201.068	27.2876	19.3991	12553.3
C. tropicales_1.6	C. tropicales	1	TRUE	76.5184	213.138	27.2876	20.3305	13579.1
C. tropicales_1.6	C. tropicales	1	TRUE	42.3847	187.535	22.1411	15.5388	9438.4
C. tropicales_1.6	C. tropicales	1	TRUE	61.9814	218.893	24.848	18.058	12426.9
C. tropicales_1.6	C. tropicales	1	TRUE	45.4012	202.72	24.9012	15.6582	10100.1
C. tropicales_1.6	C. tropicales	1	FALSE	13.1457	182.266	8.76621	8.78526	5080.56
C. tropicales_1.6	C. tropicales	1	TRUE	89.8718	222.963	25.4798	21.1669	15029
C. tropicales_1.6	C. tropicales	1	TRUE	66.3466	210.72	23.0212	18.8988	12584
C. tropicales_1.6	C. tropicales	1	TRUE	83.6116	220.102	25.2709	20.8999	14362.1
C. tropicales_1.6	C. tropicales	1	TRUE	83.4952	205.278	27.6733	21.3512	14011.9
C. tropicales_1.6	C. tropicales	1	TRUE	53.7344	192.443	26.2482	17.0433	10728.2
C. tropicales_1.6	C. tropicales	1	FALSE	28.7291	178.837	18.1998	13.1619	7481.34
C. tropicales_1.6	C. tropicales	1	FALSE	3400.65	254.613	140.599	126.593	151631
C. tropicales_1.6	C. tropicales	1	FALSE	40.6368	197.312	13.4235	15.0904	9633.54
C. tropicales_1.6	C. tropicales	1	FALSE	16.691	160.873	11.5106	10.7723	5509.67
C. tropicales_1.6	C. tropicales	1	TRUE	119.69	225.708	35.7014	23.8369	17253.4
C. tropicales_1.6	C. tropicales	1	FALSE	63.4711	196.999	34.3394	18.0934	11391.2
C. tropicales_1.6	C. tropicales	1	TRUE	71.1292	228.684	23.0212	18.3509	13368.7
C. tropicales_1.6	C. tropicales	1	FALSE	0	9.82491	0	0	0
C. tropicales_1.6	C. tropicales	1	TRUE	78.8824	209.661	23.3072	20.2542	13694.6
C. tropicales_1.6	C. tropicales	1	TRUE	92.6425	235.985	27.8166	20.5549	15546.3
C. tropicales_1.6	C. tropicales	1	TRUE	110.496	220.8	28.7995	23.2148	16518.5
C. tropicales_1.6	C. tropicales	1	TRUE	52.4973	224.171	16.9952	15.8309	11365.1
C. tropicales_1.6	C. tropicales	1	TRUE	59.7331	194.812	25.4798	18.7725	11566.7
C. tropicales_1.6	C. tropicales	1	FALSE	94.4112	168.988	21.4109	24.0954	13868.9
C. tropicales_1.6	C. tropicales	1	TRUE	47.5331	208.813	18.1998	15.8208	10531.1
C. tropicales_1.6	C. tropicales	1	TRUE	97.5867	213.547	29.3464	22.4836	15280.2
C. tropicales_1.6	C. tropicales	1	TRUE	62.474	221.869	20.3968	17.6102	12781.4
C. tropicales_1.6	C. tropicales	1	FALSE	101.535	169.663	22.7898	25.2228	14732.3
C. tropicales_1.6	C. tropicales	1	TRUE	39.6521	216.986	22.7898	14.1469	9716.22
C. tropicales_1.6	C. tropicales	1	TRUE	17.5331	195.174	13.9083	9.92581	6122.06
C. tropicales_1.6	C. tropicales	1	FALSE	97.8567	149.357	25.4798	23.3648	21143.9
C. tropicales_1.6	C. tropicales	1	TRUE	82.3884	219.172	27.8642	20.1478	14308.9
C. tropicales_1.6	C. tropicales	1	FALSE	55.6859	120.283	34.7993	20.2311	8652.67
C. tropicales_1.6	C. tropicales	1	TRUE	79.8395	215.777	22.1411	20.8059	14160.5
C. tropicales_1.6	C. tropicales	1	TRUE	27.1275	206.068	15.4431	11.9463	7855.03
C. tropicales_1.6	C. tropicales	1	FALSE	32.9514	193.348	16.3596	13.721	8516.61
C. tropicales_1.6	C. tropicales	1	TRUE	98.9099	212.044	38.5905	21.7848	15155.3
C. tropicales_1.6	C. tropicales	1	TRUE	67.4598	200.813	27.6733	19.0012	12338.3
C. tropicales_1.6	C. tropicales	1	FALSE	29.7535	198.964	17.5324	12.9975	8148.57
C. tropicales_1.6	C. tropicales	1	TRUE	65.4881	219.067	24.4177	17.9852	12504.7
C. tropicales_1.6	C. tropicales	1	TRUE	92.0168	218.301	30.7141	21.0575	14850.1
C. tropicales_1.6	C. tropicales	1	TRUE	43.0219	214.452	22.8479	14.8078	10132.1
C. tropicales_1.6	C. tropicales	1	FALSE	32.308	169.07	23.0212	14.0575	7686.11
C. tropicales_1.6	C. tropicales	1	FALSE	30.6997	215.276	15.357	12.3873	8551.77
C. tropicales_1.6	C. tropicales	1	FALSE	0.0721326	13.6152	0	1.53475	102.176
C. tropicales_1.6	C. tropicales	1	TRUE	57.527	241.437	20.7191	16.2724	12425.2
C. tropicales_1.6	C. tropicales	1	TRUE	96.2497	228.439	29.9275	21.6255	15467.7
C. tropicales_1.6	C. tropicales	1	TRUE	26.8835	188.128	15.357	12.59	7442.82
C. tropicales_1.6	C. tropicales	1	TRUE	74.9279	220.044	24.1996	19.0547	13623.9
C. tropicales_1.6	C. tropicales	1	FALSE	57.004	88.0531	38.0024	25.3028	8004.51
C. tropicales_1.6	C. tropicales	1	TRUE	77.5258	225.789	24.1996	19.8653	14018.5
C. tropicales_1.6	C. tropicales	1	FALSE	0.19499	22.9873	5.14769	2.19692	213.513
C. tropicales_1.6	C. tropicales	1	TRUE	70.6714	215.242	27.0927	18.9487	12819.3
C. tropicales_1.6	C. tropicales	1	TRUE	105.425	233.881	34.2235	22.7297	16522.7
C. tropicales_1.6	C. tropicales	1	TRUE	83.2138	231.102	26.2986	20.1279	14732.4
C. tropicales_1.6	C. tropicales	1	TRUE	97.9641	221.672	21.9004	21.8539	15592.8
C. tropicales_1.6	C. tropicales	1	TRUE	69.5567	212.314	19.6018	18.7043	12968.4
C. tropicales_1.6	C. tropicales	1	FALSE	7.01308	130.748	11.5106	7.11096	3092.38
C. tropicales_1.6	C. tropicales	1	FALSE	1.26879	50.6706	7.27994	4.31545	811.239
C. tropicales_1.6	C. tropicales	1	FALSE	15.4339	148.63	14.6506	10.558	4955.78
C. tropicales_1.6	C. tropicales	1	TRUE	43.1641	211.823	22.6732	14.7503	9821.1
C. tropicales_1.6	C. tropicales	1	TRUE	81.0789	201.801	23.3072	21.5011	13565.8
C. kamaaina_25	C. kamaaina	1	FALSE	0.395116	35.2879	3.63997	2.62984	390.339
C. kamaaina_25	C. kamaaina	1	TRUE	16.0774	184.732	12.7139	9.67787	5748.79
C. kamaaina_25	C. kamaaina	1	TRUE	37.849	215.95	20.5908	13.7912	9433.51
C. kamaaina_25	C. kamaaina	1	FALSE	4.39154	85.6453	12.3973	6.96728	2004.6
C. kamaaina_25	C. kamaaina	1	FALSE	13.2136	140.188	11.7385	9.70514	4602.98
C. kamaaina_25	C. kamaaina	1	FALSE	0.408848	19.8473	0	3.06949	298.214
C. kamaaina_25	C. kamaaina	1	TRUE	16.0608	185.522	11.5106	9.76069	5681.45
C. kamaaina_25	C. kamaaina	1	TRUE	35.292	189.279	22.1411	14.2595	8602.64
C. kamaaina_25	C. kamaaina	1	TRUE	38.1715	191.768	14.5599	14.328	8967.69
C. kamaaina_25	C. kamaaina	1	FALSE	18.8515	148.221	19.6018	11.5859	5702.24
C. kamaaina_25	C. kamaaina	1	FALSE	30.0142	165.477	15.4431	13.4744	7386.24
C. kamaaina_25	C. kamaaina	1	FALSE	28.256	182.43	13.1241	12.594	7632.74
C. kamaaina_25	C. kamaaina	1	FALSE	0.935411	23.5798	11.7385	4.96944	525.879
C. kamaaina_25	C. kamaaina	1	FALSE	6.2607	100.657	7.27994	8.2798	2641.16
C. kamaaina_25	C. kamaaina	1	FALSE	13.0243	154.815	10.4233	9.38605	4714.99
C. kamaaina_25	C. kamaaina	1	FALSE	13.2664	148.154	15.357	9.71692	4559.85
C. kamaaina_25	C. kamaaina	1	FALSE	1.02024	25.2076	10.9199	4.76478	550.327
C. kamaaina_25	C. kamaaina	1	FALSE	10.8318	141.026	10.2954	9.11708	4142.12
C. kamaaina_25	C. kamaaina	1	FALSE	9.34975	129.318	16.9952	8.50189	3532.45
C. kamaaina_25	C. kamaaina	1	FALSE	3.13434	52.7413	11.8509	6.93539	1313.16
C. kamaaina_25	C. kamaaina	1	FALSE	3.55701	69.3908	8.13922	6.47431	1651.08
C. kamaaina_25	C. kamaaina	1	FALSE	8.04989	123.538	10.9199	8.32081	3309.47
C. kamaaina_25	C. kamaaina	1	TRUE	15.938	168.478	10.2954	10.0864	5328.41
C. kamaaina_25	C. kamaaina	1	FALSE	7.44487	122.561	9.49188	7.90198	3259.85
C. kamaaina_25	C. kamaaina	1	FALSE	1.02386	31.3579	9.20848	4.33692	584.27
C. kamaaina_25	C. kamaaina	1	TRUE	15.107	168.651	11.7385	9.59395	5282.94
C. kamaaina_25	C. kamaaina	1	TRUE	34.3611	220.265	16.3596	13.1294	9090.27
C. kamaaina_25	C. kamaaina	1	FALSE	5.23074	95.6916	9.90179	7.03103	2344.62
C. kamaaina_25	C. kamaaina	1	FALSE	14.1529	159.187	11.8509	9.51029	4869.82
C. kamaaina_25	C. kamaaina	1	FALSE	0.738853	24.4515	7.27994	4.01154	453.054
C. kamaaina_25	C. kamaaina	1	TRUE	29.3542	200.813	16.7597	12.6907	8102.18
C. kamaaina_25	C. kamaaina	1	FALSE	0.110409	20.2084	3.63997	1.72391	152.666
C. kamaaina_25	C. kamaaina	1	TRUE	23.1941	177.989	14.7408	12.0536	6881.96
C. kamaaina_25	C. kamaaina	1	FALSE	4.88245	107.12	8.13922	6.89442	2426.12
C. kamaaina_25	C. kamaaina	1	TRUE	44.3558	184.14	19.0534	16.2642	9604.53
C. kamaaina_25	C. kamaaina	1	TRUE	27.8857	172.408	12.7139	13.1653	7425.5
C. kamaaina_25	C. kamaaina	1	FALSE	1.26733	24.2541	8.13922	5.21327	610.454
C. kamaaina_25	C. kamaaina	1	FALSE	12.87	167.187	11.7385	9.17975	4938.48
C. kamaaina_25	C. kamaaina	1	TRUE	22.4453	201.126	11.8509	11.3512	7134.05
C. kamaaina_25	C. kamaaina	1	TRUE	24.4915	204.917	18.9838	11.3068	7518.24
C. kamaaina_25	C. kamaaina	1	TRUE	25.2878	203.452	14.7408	11.6853	7612.39
C. kamaaina_25	C. kamaaina	1	TRUE	19.2151	190.988	6.71177	10.4138	6400.34
C. kamaaina_25	C. kamaaina	1	FALSE	16.3134	147.003	14.0032	11.1198	5321.78
C. kamaaina_25	C. kamaaina	1	FALSE	14.8771	155.595	13.0228	10.2016	5140.53
C. kamaaina_25	C. kamaaina	1	FALSE	14.5003	144.734	16.2784	10.3401	4775.26
C. kamaaina_25	C. kamaaina	1	TRUE	25.8859	184.14	14.5599	12.5339	7288.42
C. kamaaina_25	C. kamaaina	1	TRUE	32.3727	207.58	16.0324	13.5162	8707.78
C. kamaaina_25	C. kamaaina	1	TRUE	23.795	192.756	15.357	11.8347	7194.44
C. kamaaina_25	C. kamaaina	1	TRUE	18.6408	176.28	15.4431	10.6596	5977.09
C. kamaaina_25	C. kamaaina	1	TRUE	30.7718	203.371	11.7385	12.829	8518.21
C. kamaaina_25	C. kamaaina	1	TRUE	34.3162	171.56	18.1998	15.1427	8255.42
C. kamaaina_25	C. kamaaina	1	FALSE	6.97477	117.027	11.5106	7.16706	2906.96
C. kamaaina_25	C. kamaaina	1	FALSE	17.1736	195.732	15.008	9.33476	5808.1
C. kamaaina_25	C. kamaaina	1	TRUE	27.4671	195.616	17.5324	12.325	7746
C. kamaaina_25	C. kamaaina	1	FALSE	12.3433	173.453	10.4233	8.73777	4825.34
C. kamaaina_25	C. kamaaina	1	FALSE	15.8868	97.5409	16.2784	12.8627	4229.14
C. kamaaina_25	C. kamaaina	1	TRUE	19.5705	200.37	10.4233	10.5728	6651.1
C. kamaaina_25	C. kamaaina	1	TRUE	28.4706	204.58	13.1241	12.244	8004.17
C. kamaaina_25	C. kamaaina	1	FALSE	54.0994	94.7141	13.4235	21.1559	8431.67
C. kamaaina_25	C. kamaaina	1	FALSE	15.7713	147.21	12.7139	10.495	5129.32
C. kamaaina_25	C. kamaaina	1	FALSE	22.3679	173.896	18.5603	11.3828	6371.43
C. kamaaina_25	C. kamaaina	1	FALSE	0.116352	18.022	0	1.7159	141.959
C. kamaaina_25	C. kamaaina	1	TRUE	12.502	184.198	8.76621	8.63766	5081.76
C. kamaaina_25	C. kamaaina	1	TRUE	19.8738	185.012	11.5106	10.5901	6283.76
C. kamaaina_25	C. kamaaina	1	TRUE	19.7955	172.047	12.3973	11.3409	6192.4
C. kamaaina_25	C. kamaaina	1	FALSE	24.1046	155.118	17.5324	12.9304	6505.48
C. kamaaina_25	C. kamaaina	1	FALSE	14.3311	159.163	15.008	9.70397	5032.88
C. kamaaina_25	C. kamaaina	1	FALSE	36.532	152.56	18.1998	15.6312	7799.6
C. kamaaina_25	C. kamaaina	1	FALSE	23.0739	138.165	16.7597	12.739	5879.77
C. kamaaina_25	C. kamaaina	1	TRUE	21.3681	199.219	10.4233	10.9347	6989.89
C. kamaaina_25	C. kamaaina	1	TRUE	48.6194	192.814	18.5603	16.4409	10366.6
C. kamaaina_25	C. kamaaina	1	FALSE	0.0669634	12.9409	0	1.53475	95.613
C. kamaaina_25	C. kamaaina	1	FALSE	240.764	262.984	52.4964	26.8276	30880
C. kamaaina_25	C. kamaaina	1	FALSE	16.7944	100.773	19.6018	12.611	4354.05
C. kamaaina_25	C. kamaaina	1	TRUE	39.2274	177.85	17.6078	15.397	8871.57
C. kamaaina_25	C. kamaaina	1	FALSE	13.3594	160.955	11.5106	9.65501	4888.11
C. kamaaina_12.5	C. kamaaina	1	TRUE	34.2736	191.802	19.8036	13.8648	8532.4
C. kamaaina_12.5	C. kamaaina	1	TRUE	47.1863	216.345	19.8036	15.7615	10536.2
C. kamaaina_12.5	C. kamaaina	1	TRUE	26.826	186.187	18.5603	12.1578	7324.18
C. kamaaina_12.5	C. kamaaina	1	TRUE	37.222	193.767	17.9063	14.7046	8906.67
C. kamaaina_12.5	C. kamaaina	1	TRUE	23.1321	176.79	15.4431	11.7208	6783.1
C. kamaaina_12.5	C. kamaaina	1	FALSE	5.08482	86.2038	10.9199	7.58421	2276.89
C. kamaaina_12.5	C. kamaaina	1	TRUE	18.5024	190.232	18.417	10.2394	6261.7
C. kamaaina_12.5	C. kamaaina	1	FALSE	17.1844	149.781	16.6008	11.1322	5285.96
C. kamaaina_12.5	C. kamaaina	1	TRUE	41.5355	189.245	21.8398	15.2254	9224.49
C. kamaaina_12.5	C. kamaaina	1	TRUE	30.0487	177.618	16.3596	13.5058	7749.99
C. kamaaina_12.5	C. kamaaina	1	FALSE	27.4985	180.744	10.9199	12.7196	7554.83
C. kamaaina_12.5	C. kamaaina	1	TRUE	28.9807	192.871	14.5599	12.8022	7877.29
C. kamaaina_12.5	C. kamaaina	1	FALSE	5.30492	107.843	9.76706	7.26354	2556.93
C. kamaaina_12.5	C. kamaaina	1	TRUE	29.2575	174.618	16.2784	13.1894	7653.31
C. kamaaina_12.5	C. kamaaina	1	TRUE	17.0631	170.862	13.9083	10.2427	5676.96
C. kamaaina_12.5	C. kamaaina	1	FALSE	32.3714	175.885	13.4235	13.8762	8117.2
C. kamaaina_12.5	C. kamaaina	1	TRUE	36.8802	184.872	15.357	14.2817	8560.1
C. kamaaina_12.5	C. kamaaina	1	TRUE	32.228	195.313	16.2784	13.6205	8412.34
C. kamaaina_12.5	C. kamaaina	1	TRUE	26.7956	198.872	11.5106	12.1532	7571.34
C. kamaaina_12.5	C. kamaaina	1	TRUE	31.169	179.174	17.3042	13.6612	7681.86
C. kamaaina_12.5	C. kamaaina	1	FALSE	23.1153	157.362	19.8036	12.546	6301.03
C. kamaaina_12.5	C. kamaaina	1	FALSE	1.35083	21.557	9.90179	5.75647	623.983
C. kamaaina_12.5	C. kamaaina	1	FALSE	28.6923	245.844	10.2954	11.6673	8938.93
C. kamaaina_12.5	C. kamaaina	1	FALSE	1.98302	30.7654	8.13922	6.16638	855.468
C. kamaaina_12.5	C. kamaaina	1	FALSE	0.866843	38.0089	4.60424	3.92996	577.701
C. kamaaina_12.5	C. kamaaina	1	FALSE	12.4864	144.84	13.1241	9.55805	4468.59
C. kamaaina_12.5	C. kamaaina	1	TRUE	22.6881	199.161	13.9083	11.311	7096.18
C. kamaaina_12.5	C. kamaaina	1	FALSE	10.7105	135.328	6.71177	8.81205	4026.48
C. kamaaina_12.5	C. kamaaina	1	FALSE	5.55466	92.1566	14.0032	7.57023	2421.7
C. kamaaina_12.5	C. kamaaina	1	FALSE	0.0508801	16.057	0	1.21332	86.5761
C. kamaaina_12.5	C. kamaaina	1	FALSE	25.4535	164.572	13.4235	13.1768	6853.78
C. kamaaina_12.5	C. kamaaina	1	FALSE	10.1294	163.642	8.30041	8.2615	4427.36
C. kamaaina_12.5	C. kamaaina	1	FALSE	6.66485	73.2051	11.5106	9.4823	2337.85
C. kamaaina_12.5	C. kamaaina	1	TRUE	24.9988	167.572	13.1241	13.1049	7010.25
C. kamaaina_12.5	C. kamaaina	1	TRUE	29.7237	177.325	16.3596	13.1736	7570.5
C. kamaaina_12.5	C. kamaaina	1	FALSE	1.46904	49.5195	7.27994	4.87734	884.139
C. kamaaina_12.5	C. kamaaina	1	FALSE	0.414913	24.3359	5.14769	3.10691	321.38
C. kamaaina_12.5	C. kamaaina	1	FALSE	0.288225	26.9751	5.14769	2.57385	273.85
C. kamaaina_12.5	C. kamaaina	1	FALSE	3.24935	67.344	8.76621	6.44904	1526.22
C. kamaaina_12.5	C. kamaaina	1	FALSE	11.5606	159.63	7.27994	8.90562	4525.39
C. kamaaina_12.5	C. kamaaina	1	TRUE	21.5468	183.326	13.4235	11.7253	6827.56
C. kamaaina_12.5	C. kamaaina	1	TRUE	19.5507	192.732	13.1241	10.4362	6549.64
C. kamaaina_12.5	C. kamaaina	1	FALSE	11.5395	105.738	11.3949	10.1877	3735.28
C. kamaaina_12.5	C. kamaaina	1	TRUE	27.8543	196.859	15.008	12.4308	7755.66
C. kamaaina_12.5	C. kamaaina	1	FALSE	2.40703	62.9034	6.71177	5.87579	1272.8
C. kamaaina_12.5	C. kamaaina	1	TRUE	13.864	170.616	9.90179	9.36469	5103.5
C. kamaaina_12.5	C. kamaaina	1	FALSE	4.29728	79.076	9.49188	6.84854	1949.9
C. kamaaina_12.5	C. kamaaina	1	FALSE	0.586644	25.4051	5.86927	3.50212	398.225
C. kamaaina_12.5	C. kamaaina	1	TRUE	34.237	180.402	21.162	13.945	8309.33
C. kamaaina_12.5	C. kamaaina	1	FALSE	0.26129	23.0451	5.14769	2.57385	246.218
C. kamaaina_12.5	C. kamaaina	1	FALSE	7.12038	161.711	10.4233	6.86718	3605.2
C. kamaaina_12.5	C. kamaaina	1	FALSE	11.2702	125.282	13.9083	9.5811	3912.65
C. kamaaina_12.5	C. kamaaina	1	FALSE	11.3699	126.178	16.7597	9.16064	3855.77
C. kamaaina_12.5	C. kamaaina	1	FALSE	33.8876	175.755	21.2245	14.4063	8134.83
C. kamaaina_12.5	C. kamaaina	1	TRUE	28.4947	186.36	11.8509	12.6838	7637.21
C. kamaaina_12.5	C. kamaaina	1	TRUE	28.6889	170.351	17.9801	13.4169	7365.69
C. kamaaina_12.5	C. kamaaina	1	FALSE	16.8487	147.571	11.5106	11.0208	5176.63
C. kamaaina_12.5	C. kamaaina	1	FALSE	17.1012	157.593	19.6018	10.9833	5565.15
C. kamaaina_12.5	C. kamaaina	1	FALSE	8.0814	126.631	8.76621	7.88044	3319.06
C. kamaaina_12.5	C. kamaaina	1	FALSE	11.4476	112.399	16.0324	9.87151	3856.58
C. kamaaina_12.5	C. kamaaina	1	TRUE	38.1305	171.396	22.7898	15.2911	8580.48
C. kamaaina_12.5	C. kamaaina	1	TRUE	30.2767	173.467	19.6018	13.6563	7783.66
C. kamaaina_12.5	C. kamaaina	1	TRUE	28.8052	174.512	16.2784	13.3006	7446.58
C. kamaaina_12.5	C. kamaaina	1	FALSE	3.95279	68.5715	8.13922	6.17716	1848.84
C. kamaaina_12.5	C. kamaaina	1	FALSE	0.238855	18.3591	0	2.42665	214.071
C. kamaaina_12.5	C. kamaaina	1	FALSE	32.7408	57.2398	31.0999	21.2154	5159.27
C. kamaaina_12.5	C. kamaaina	1	FALSE	0.0808057	15.7199	0	1.53475	110.742
C. kamaaina_12.5	C. kamaaina	1	FALSE	23.5637	169.802	12.7139	12.2417	6638.19
C. kamaaina_12.5	C. kamaaina	1	FALSE	16.5237	177.185	12.7139	10.3654	5701.29
C. kamaaina_12.5	C. kamaaina	1	FALSE	3.50968	66.8912	8.13922	6.59178	1626.55
C. kamaaina_12.5	C. kamaaina	1	FALSE	4.91882	56.8688	8.30041	8.6167	1835.24
C. kamaaina_12.5	C. kamaaina	1	FALSE	23.4804	74.414	24.7946	17.0919	4487.81
C. kamaaina_12.5	C. kamaaina	1	FALSE	6.9556	59.508	12.7139	9.553	2162.39
C. kamaaina_12.5	C. kamaaina	1	FALSE	15.9225	140.723	15.008	10.2637	4954.94
C. kamaaina_12.5	C. kamaaina	1	FALSE	1.07251	35.0325	4.88353	4.35779	621.827
C. kamaaina_12.5	C. kamaaina	1	FALSE	0.761559	25.5448	8.13922	4.22636	458.213
C. kamaaina_12.5	C. kamaaina	1	FALSE	2.90475	39.5789	11.3949	7.32391	1162.61
C. kamaaina_12.5	C. kamaaina	1	TRUE	19.4936	173.116	11.7385	10.9539	6093.61
C. kamaaina_12.5	C. kamaaina	1	TRUE	31.5454	172.942	18.1998	13.4822	7698.56
C. kamaaina_12.5	C. kamaaina	1	FALSE	26.7211	169.292	20.1353	13.0154	6900.98
C. kamaaina_12.5	C. kamaaina	1	TRUE	33.2534	173.838	16.9952	13.9923	7917.79
C. kamaaina_12.5	C. kamaaina	1	FALSE	10.172	136.711	11.8509	8.76542	3941.16
C. kamaaina_12.5	C. kamaaina	1	TRUE	29.0147	189.943	19.8704	12.6433	7782.83
C. kamaaina_12.5	C. kamaaina	1	TRUE	29.9035	193.546	20.3968	12.7378	8010.55
C. kamaaina_12.5	C. kamaaina	1	TRUE	18.2051	188.975	10.2954	10.1793	6178.12
C. kamaaina_12.5	C. kamaaina	1	FALSE	19.877	129.539	14.6506	12.4959	5359.85
C. kamaaina_12.5	C. kamaaina	1	FALSE	22.5105	170.582	14.7408	11.785	6565.7
C. kamaaina_12.5	C. kamaaina	1	FALSE	8.92439	105.993	13.9083	8.76019	3257.46
C. kamaaina_12.5	C. kamaaina	1	TRUE	45.5137	216.23	21.9004	14.8617	10323.6
C. kamaaina_12.5	C. kamaaina	1	FALSE	0.119497	14.2317	0	1.95642	135.013
C. kamaaina_12.5	C. kamaaina	1	FALSE	29.4399	165.954	16.9952	13.7083	7491.17
C. kamaaina_12.5	C. kamaaina	1	FALSE	9.56769	106.841	14.5599	9.33995	3352.01
C. kamaaina_12.5	C. kamaaina	1	FALSE	70.4371	107.9	19.6018	20.5707	19289.7
C. kamaaina_12.5	C. kamaaina	1	FALSE	17.1969	182.685	14.7408	10.3006	5967.92
C. kamaaina_12.5	C. kamaaina	1	FALSE	10.4837	122.33	11.8509	9.66534	3750.23
C. kamaaina_12.5	C. kamaaina	1	FALSE	22.887	191.744	15.357	11.3076	6859.61
C. kamaaina_12.5	C. kamaaina	1	FALSE	12.9811	153.654	11.8509	9.39724	4610.7
C. kamaaina_12.5	C. kamaaina	1	FALSE	20.8474	155.629	15.357	11.9282	6066.71
C. kamaaina_12.5	C. kamaaina	1	FALSE	0.438442	22.8477	6.51138	3.30579	328.907
C. kamaaina_12.5	C. kamaaina	1	FALSE	2.38875	36.8579	7.27994	6.60783	986.395
C. kamaaina_12.5	C. kamaaina	1	FALSE	12.3965	172.047	8.13922	8.5931	5048.09
C. kamaaina_12.5	C. kamaaina	1	FALSE	3.8241	45.6714	13.4235	8.00503	1397.5
C. kamaaina_12.5	C. kamaaina	1	FALSE	1.23906	43.0899	5.86927	4.38018	753.302
C. kamaaina_12.5	C. kamaaina	1	FALSE	0.765081	21.4173	8.76621	4.49367	442.449
C. kamaaina_12.5	C. kamaaina	1	FALSE	17.446	141.455	19.6693	11.0021	5000.05
C. kamaaina_12.5	C. kamaaina	1	FALSE	15.505	105.796	18.1998	11.7367	4194.73
C. kamaaina_12.5	C. kamaaina	1	TRUE	26.2661	170.525	19.0534	12.8547	7197.39
C. kamaaina_12.5	C. kamaaina	1	FALSE	24.0068	151.583	16.7597	12.9926	6257.13
C. kamaaina_12.5	C. kamaaina	1	FALSE	24.3832	155.652	19.6018	12.383	6301.08
C. kamaaina_12.5	C. kamaaina	1	FALSE	25.1226	108.69	29.7054	14.1966	5324.69
C. kamaaina_12.5	C. kamaaina	1	FALSE	26.96	158.99	17.3042	13.4042	6753.02
C. kamaaina_12.5	C. kamaaina	1	FALSE	45.2038	69.6701	36.5812	24.0191	6584.06
C. kamaaina_12.5	C. kamaaina	1	FALSE	1.40277	34.9747	8.76621	5.18025	719.663
C. kamaaina_12.5	C. kamaaina	1	FALSE	18.4535	151.385	12.7139	11.4806	5656.73
C. kamaaina_12.5	C. kamaaina	1	FALSE	4.7443	115.515	11.5106	6.07343	2381.45
C. kamaaina_12.5	C. kamaaina	1	FALSE	0.135412	23.7194	3.63997	1.81998	176.573
C. kamaaina_12.5	C. kamaaina	1	FALSE	3.56307	76.0418	9.49188	6.23208	1738.96
C. kamaaina_12.5	C. kamaaina	1	TRUE	29.5781	203.626	19.0534	12.6997	8143.3
C. kamaaina_12.5	C. kamaaina	1	FALSE	18.983	158.571	16.1148	11.1862	5737.33
C. kamaaina_12.5	C. kamaaina	1	TRUE	26.5454	178.698	20.1353	12.6818	7291.8
C. kamaaina_12.5	C. kamaaina	1	TRUE	33.8376	184.279	16.1148	14.3099	8410.67
[truncated: 8,162 more rows]

## Sheet: Supp. Fig. 1
	Supp. Fig. 1A	Species	C. elegans	C. elegans	C. briggsae JU1348	C. briggsae JU1348
		Parental diet	E. coli	P. vranovensis	E. coli	P. vranovensis
		Percent Surviving	42.5	75.1	76	0
		Percent Surviving	38.5	61.2	71	0.5
		Percent Surviving	42	71.6	58.3	0
	Supp. Fig. 1B	Species	C. elegans	C. elegans	C. briggsae SX1125	C. briggsae SX1125
		Parental diet	E. coli	P. vranovensis	E. coli	P. vranovensis
		Percent Surviving	0	15	1	0
		Percent Surviving	0	8	2	0
		Percent Surviving	0	12	2	0
	Supp. Fig. 1C	C. elegans isolate	N2	N2	MY1	PS2025	CX11262	JU440	JU778	JU1213	LKC34	JU1491	EG4724	KR314
		Parental diet	E. coli	P. vranovensis	P. vranovensis	P. vranovensis	P. vranovensis	P. vranovensis	P. vranovensis	P. vranovensis	P. vranovensis	P. vranovensis	P. vranovensis	P. vranovensis
		Percent Surviving	10.5	90.5	93	95.5	92	82	99	93	91.5	91	94	77.5
		Percent Surviving	14.5	87	89	80	93.5	97.5	89.5	89	87.5	78	89	95
		Percent Surviving	24.5	80.5	95	89.5	96	78.5	79.5	70	87	82	97.5	87
	Supp. Fig. 1D	RNAi	Empty vector	Empty vector	gpdh-2	mek-2
		Parental [NaCl]	50 mM	300 mM	300 mM	50 mM
		Percent Developing	0.5	81.5	47	12
		Percent Developing	0	79	53	6.5
		Percent Developing	0.5	88	51	5
	Supp. Fig. 1E		Uninfected	N. parisii-infected
		Percent Infected	0	90.69
		Percent Infected	0	100
		Percent Infected	0	94.936
	Supp. Fig. 1F		Uninfected	N. parisii-infected
		Percent Infected	0	62.903
		Percent Infected	0	67.308
		Percent Infected	0	59.259
	Supp. Fig. 1G		Uninfected	N. parisii-infected
		Percent Infected	0	22.34
		Percent Infected	0	27.103
		Percent Infected	0	50
