# Supplementary material for: Intergenerational adaptations to stress are evolutionarily conserved, stress-specific, and have deleterious trade-offs
Source: eLife. 2021 Oct 8;10:e73425. doi: 10.7554/eLife.73425 (PMC8570697; doi:10.7554/eLife.73425)
Supplement: Figure 3—source data 1. [file elife-73425-fig3-data1.xlsx]

## Sheet: Fig. 3
Fig. 3A	Parental [NaCl]	50 mM	300 mM	50 mM	300 mM		Fig. 3F	Parental N. parisii	-	+	-	+		Fig. 3G	Parental N. parisii	-	+	-	+
	Parental diet	E. coli	E. coli	P. vranovensis	P. vranovensis			Parental diet	E. coli	E. coli	P. vranovensis	P. vranovensis			Parental diet	E. coli	E. coli	P. vranovensis	P. vranovensis
	Percent Developing	0	7.5	0	16			Flourescence	24.233	0	15.212	0.003			Percent surviving	0.8	0.4	26.19	7.66
	Percent Developing	0	6.18	0	15			Flourescence	18.057	0	5.043	0			Percent surviving	32.576	19.626	68.132	43.548
	Percent Developing	0	9.8	0	8.4			Flourescence	21.467	0.003	20.554	0			Percent surviving	1	1.26	48.077	62.182
								Flourescence	31.265	0	16.885	0			Percent surviving	2.719	2.281	60.87	24.183
								Flourescence	21.681	7.23	33.154	0
Fig. 3B	Parental [NaCl]	50 mM	300 mM	50 mM	300 mM			Flourescence	6.082	0	15.549	0
	Parental diet	E. coli	E. coli	P. vranovensis	P. vranovensis			Flourescence	17.001	0	47.562	0
	Percent Surviving	0	0	75.5	1			Flourescence	26.39	0	45.112	0
	Percent Surviving	0	0	82.5	0.5			Flourescence	33.323	0	0	1.313
	Percent Surviving	0	0	63.5	2			Flourescence	10.726	7.186	9.38	0
								Flourescence	39.556	0	0.113	0
								Flourescence	32.864	0	22.199	0
Fig. 3C	Genotype	wild-type	wild-type	osm-8	osm-8			Flourescence	24.01	1.716	18.2	0
	Parental environment	E. coli	P. vranovensis	E. coli	P. vranovensis			Flourescence	49.034	0.358	37.257	32.048
	Percent Surviving	8.6	68.2	0	0			Flourescence	34.906	0	43.01	15.064
	Percent Surviving	13.6	81.2	0	0			Flourescence	31.549	0	0	0
	Percent Surviving	4.1	76.8	0	0			Flourescence	30.507	0	12.572	0
								Flourescence	26.907	3.92	41.391	0.602
								Flourescence	34.65	0.21	13.9	0
Fig. 3D	Parental N. parisii	-	+	-	+			Flourescence	4.979	0	25.922	0
	Parental [NaCl]	50 mM	50 mM	300 mM	300 mM			Flourescence	43.252	0	19.218	20.623
	Percent Developing	20.297	12	88.78	71.078			Flourescence	31.829	0	20.345	0
	Percent Developing	5.376	4.167	92.09	96.059			Flourescence	21.046	30.991	0.345	0
	Percent Developing	26	9.33	65	62			Flourescence	0	7.228	24.653	0
								Flourescence	39.227	27.817	0.906	0
								Flourescence	31.505	0	12.648	22.32
Fig. 3E	Parental N. parisii	-	+	-	+			Flourescence	26.138	6.087	22.906	19.16
	Parental [NaCl]	50 mM	50 mM	300 mM	300 mM			Flourescence	0	0	16.665	13.449
	Flourescence	40.429	20.591	9.401	39.586			Flourescence	45.915	0	26.09	9.313
	Flourescence	26.008	0	24.704	29.848			Flourescence	29.629	1.685	23.419	15.602
	Flourescence	27.818	8.68	28.22	20.136			Flourescence	16.883	16.771	20.945	1.198
	Flourescence	30.396	9.911	45.047	34.627			Flourescence	32.606	0.144	15.475	0
	Flourescence	23.725	2.666	35.834	21.372			Flourescence	22.954	4.205	24.195	1.627
	Flourescence	40.379	0.486	21.793	26.653			Flourescence	12.599	1.128	34.596	17.92
	Flourescence	29.984	0	32.93	24.445			Flourescence	2.554	3.268	18.444	4.423
	Flourescence	37.492	0.751	25.039	21.333			Flourescence	32.877	5.835	18.889	0
	Flourescence	43.864	3.953	39.554	22.084			Flourescence	42.861	9.763	32.039	15.225
	Flourescence	47.197	21.169	1.457	5.84			Flourescence	27.027	33.126	26.17	0
	Flourescence	37.759	3.513	35.259	30.221			Flourescence	23.803	0	19.336	9.828
	Flourescence	55.511	0	27.976	7.631			Flourescence	29.179	0	0	1.888
	Flourescence	14.959	22.675	29.744	0.004			Flourescence	31.586	23.355	36.914	38.761
	Flourescence	38.048	0.026	27.916	28.262			Flourescence	34.557	45.823	7.25	1.128
	Flourescence	20.821	20.512	31.665	6.626			Flourescence	41.015	2.059	33.486	7.957
	Flourescence	22.767	3.313	27.894	20.412			Flourescence	29.978	0.405	27.958	0
	Flourescence	46.472	1.459	2.91	34.979			Flourescence	26.693	32.304	20.556	1.207
	Flourescence	42.422	28.373	22.019	1.253			Flourescence	25.564	4.125	20.32	7.234
	Flourescence	22.099	40.62	46.182	8.144			Flourescence	25.224	0.005	31.05	17.821
	Flourescence	6.73	0	29.714	6.263			Flourescence	31.268	34.064	29.832	15.28
	Flourescence	41.333	21.757	28.542	0			Flourescence	28.043	25.274	40.03	12.14
	Flourescence	13.361	3.562	34.47	0			Flourescence	22.734	21.237	45.429	14.734
	Flourescence	29.455	0.184	27.096	22.358			Flourescence	6.468	10.187	37.467	0
	Flourescence	31.307	0	22.556	34.58			Flourescence	14.742	2.309	12.638	0
	Flourescence	13.248	0.626	12.032	4.773			Flourescence	3.567	9.52	14.295	1.274
	Flourescence	4.216	0	6.945	12.507			Flourescence	2.679	14.773	6.354	5.062
	Flourescence	0.927	0	0	20.087			Flourescence	14.516	0.448	7.621	9.497
	Flourescence	28.9	20.497	28.341	15.242			Flourescence	4.459	24.05	24.915	18.771
	Flourescence	38.413	0	29.475	34.798			Flourescence	14.387	13.376	27.912	2.287
	Flourescence	33.373	16.975	13.713	19.045			Flourescence	19.791	0	0	0.749
	Flourescence	29.372	0	15.231	18.73			Flourescence	28.232	0	16.843	17.47
	Flourescence	9.679	0	0	16.241			Flourescence	20.458	18.797	29.276	0.446
	Flourescence	12.395	0	17.987	28.9			Flourescence	10.97	13.462	33.295	0.494
	Flourescence	25.594	0	23.889	21.513			Flourescence	0	0	35.513	0
	Flourescence	24.072	6.984	12.528	38.268			Flourescence	0	0	35.373	0
	Flourescence	23.338	24.075	7.378	18.24			Flourescence	0.619	0	0	11.089
	Flourescence	14.888	31.74	14.93	9.367			Flourescence	7.74	15.195	26.834	32.864
	Flourescence	26.489	11.837	9.77	0			Flourescence	15.704	22.495	28.675	1.651
	Flourescence	34.605	0.144	17.911	21.322			Flourescence	9.125	23.008	37.946	0.712
	Flourescence	6.904	0	18.307	13.885			Flourescence	18.749	0	32.995	0
	Flourescence	24.267	0	20.588	19.261			Flourescence	17.545	0	44.985	26.158
	Flourescence	2.054	14.684	18.792	19.541			Flourescence	26.541	11.916	35.832	4.266
	Flourescence	28.943	0	12.518	2.074			Flourescence	0.431	6.17	17.98	28.79
	Flourescence	14.881	16.614	21.944	12.65			Flourescence	13.863	19.477	38.38	5.919
	Flourescence	11.54	5.767	4.867	19.779			Flourescence	19.433	12.739	2.107	5.828
	Flourescence	26.76	2.04	19.951	4.878			Flourescence	0	0	21.762	11.848
	Flourescence	23.197	0	0.163	9.333			Flourescence	10.9	13.368	11.431	0
	Flourescence	35.541	0	0	17.41			Flourescence	22.412	1.373	32.445	0
	Flourescence	13.723	0	0	25.665			Flourescence	5.9	0	19.736	0
	Flourescence	24.795	0.385	17.139	19.644			Flourescence	23.876	0.008	15.481	31.928
	Flourescence	44.215	0.185	22.592	3.992			Flourescence	34.258	13.177	11.428	1.616
	Flourescence	24.376	25.992	38.006	5.648
	Flourescence	29.112	2.719	32.025	35.211
	Flourescence	16.44	0	25.276	14.721
	Flourescence	25.528	0	28.61	9.176
	Flourescence	19.745	31.903	26.996	28.471
	Flourescence	10.245	0	24.672	21.001
	Flourescence	37.312	0	27.841	4.846
	Flourescence	35.905	8.877	29.698	24.972
	Flourescence	34.973	0	36.605	28.822
	Flourescence	38.393	0.065	30.605	4.438
	Flourescence	41.994	5.328	24.935	21.497
	Flourescence	0.163	7.388	33.721	1.408
	Flourescence	24.045	31.179	29.828	26.96
	Flourescence	14.934	8.752	42.966	28.572
	Flourescence	26.148	6.687	34.928	37.143
	Flourescence	27.936	30.496	27.23	0.28
	Flourescence	18.175	4.034	31.074	25.534
	Flourescence	18.524	1.757	27.203	21.301
	Flourescence	29.058	6.73	21.858	28.557
	Flourescence	12.481	0	25.725	13.018
	Flourescence	23.539	0	32.829	13.047
	Flourescence	7.136	35.609	20.039	34.93
	Flourescence	24.285	22.38	27.055	35.783
	Flourescence	23.23	0.038	24.416	29.554
	Flourescence	32.118	34.782	31.696	15.442
	Flourescence	16.138	25.289	12.183	1.898
	Flourescence	22.217	46.8	33.638	21.888
	Flourescence	32.958	0.98	42.002	15.177
	Flourescence	15.012	0	43.703	18.183
	Flourescence	31.866	9.379	37.405	29.644
	Flourescence	12.425	1.624	35.922	23.938
	Flourescence	24.846	4.296	17.375	32.337
	Flourescence	17.776	24.592	20.179	4.676
	Flourescence	28.154	18.326	37.582	8.993
	Flourescence	31.517	41.916	41.173	33.23
	Flourescence	0.005	23.527	40.924	23.43
	Flourescence	32.118	24.271	24.281	12.986
	Flourescence	23.847	25.878	37.688	37.112
	Flourescence	36.411	43.471	26.678	30.028
	Flourescence	45.148	29.377	28.6	35.618
	Flourescence	34.262	8.064	42.335	27.106
	Flourescence	30.376	18.548	0.431	19.692
	Flourescence	30.458	1.695	25.622	19.936
	Flourescence	26.63	15.456	27.233	9.591
	Flourescence	4.404	10.311	38.901	9.97
	Flourescence	25.88	5.35	36.1	28.92
	Flourescence	31.484	9.237	37.197	24.161
	Flourescence	33.289	40.558	30.415	40.673
	Flourescence	29.344	12.593	43.119	12.452
