# Supplementary material for: Intergenerational adaptations to stress are evolutionarily conserved, stress-specific, and have deleterious trade-offs
Source: eLife. 2021 Oct 8;10:e73425. doi: 10.7554/eLife.73425 (PMC8570697; doi:10.7554/eLife.73425)
Supplement: Figure 4—source data 1. [file elife-73425-fig4-data1.xlsx]

## Sheet: Figure 4
	Fig. 4A	Parental Diet	E. coli	P. sp. 15C5	P. vranovensis
		Percent L4+	1	80.5	57
		Percent L4+	2	57	58
		Percent L4+	0	49	40.1
	Fig. 4B		E. coli	P. vranovensis	P. sp. 15C5
		Percent Surviving	6.67	75.3	46.6
		Percent Surviving	2.66	70.3	66.3
		Percent Surviving	2.33	59	62
	Fig. 4C	Parental Diet	E. coli	A. sp BIGb0469
		Percent L4+	76.258	46.9
		Percent L4+	65.13	38.21
		Percent L4+	68.91	25.6
	Fig. 4D	Parental Diet	E. coli	S. plymuthica BUR1537
		Percent L4+	84.8	31.8
		Percent L4+	94.3	36.8
		Percent L4+	91.1	41.9

## Sheet: Figure Supplement 1
Supp. Fig. 2	Parental Diet	HB101	BIGb0446	BIGb0469	BUR1537
	Percent Surviving	24	74.2	10.8	29
	Percent Surviving	24.8	82	5.1	11.35
	Percent Surviving	21.2	73.4	1.9	21.9
