# Supplementary material for: Intergenerational adaptations to stress are evolutionarily conserved, stress-specific, and have deleterious trade-offs
Source: eLife. 2021 Oct 8;10:e73425. doi: 10.7554/eLife.73425 (PMC8570697; doi:10.7554/eLife.73425)
Supplement: Supplementary file 2. [file elife-73425-supp2.xlsx]

## Sheet: All single copy
	Alternate gene name	CELEG:HB101_1	CELEG:HB101_2	CELEG:HB101_3	CELEG:446_1	CELEG:446_2	CELEG:446_3	CBRIG:HB101_1	CBRIG:HB101_2	CBRIG:HB101_3	CBRIG:446_1	CBRIG:446_2	CBRIG:446_3	CKAMA:HB101_1	CKAMA:HB101_2	CKAMA:HB101_3	CKAMA:446_1	CKAMA:446_2	CKAMA:446_3	CTROP:HB101_1	CTROP:HB101_2	CTROP:HB101_3	CTROP:446_1	CTROP:446_2	CTROP:446_3		baseMeanCELEG	log2FoldChangeCELEG	Fold Change	lfcSECELEG	statCELEG	pvalueCELEG	padjCELEG		baseMeanCBRIG	log2FoldChangeCBRIG	Fold change	lfcSECBRIG	statCBRIG	pvalueCBRIG	padjCBRIG		baseMeanCKAMA	log2FoldChangeCKAMA	Fold Change	lfcSECKAMA	statCKAMA	pvalueCKAMA	padjCKAMA
2RSSE.1	rga-9	3257.69	3995.43	5079.46	3779.73	4213.16	4017.28	6719.04	7379.44	6559.32	4156.82	4157.91	4081.38	10981.3	12149.8	11079.4	11396.3	9213.96	13946.6	2892.12	2671.5	2988.3	1799.72	1782.8	1736.82		5834.8	-0.0384487	0.973701	0.139724	-0.275177	0.78318	0.829335		5834.8	-0.736797	0.60007	0.139662	-5.27556	1.32352e-07	6.26812e-07		5834.8	0.014461	1.01007	0.139142	0.10393	0.917225	0.956443
4R79.1	nas-6	124.642	138.226	160.644	184.917	206.886	227.303	222.251	214.915	184.598	156.956	183.022	168.375	355.059	308.375	298.156	446.875	408.131	343.409	192.153	111.616	109.609	87.7911	53.9888	65.9249		206.409	0.54557	1.4596	0.185224	2.94545	0.00322482	0.00739046		206.409	-0.290327	0.817716	0.186502	-1.5567	0.119542	0.18826		206.409	0.318076	1.24667	0.176952	1.79753	0.0722522	0.179469
4R79.2	4R79.2	32.1048	24.4958	53.0045	50.5755	54.4436	61.4117	29.2967	34.6309	35.4997	52.985	53.5437	40.3707	65.2981	42.0989	69.3626	77.1157	70.3356	68.6818	38.2122	14.5586	21.9219	32.0319	42.2521	47.9454		46.3407	0.594246	1.50968	0.269292	2.2067	0.027335	0.0482433		46.3407	0.563231	1.47758	0.285139	1.97529	0.0482356	0.0873004		46.3407	0.289309	1.22205	0.260413	1.11096	0.266584	0.44291
AC3.1	sri-20	16.9966	16.6221	12.2318	9.48291	10.111	11.9633	18.1842	17.3155	26.3712	5.9983	20.444	12.8005	1.02028	5.26237	1.03526	2.96599	7.40374	4.22657	3.27533	6.06607	4.61513	29.6592	10.563	20.3768		11.458	-0.53471	0.690297	0.44298	-1.20708	0.227403	0.301542		11.458	-0.653361	0.635798	0.436536	-1.49669	0.134473	0.208086		11.458	1.02256	2.03152	0.735287	1.3907	0.164318	0.321062
AC3.10	spe-10	8.49832	3.4994	0	16.5951	10.8887	14.356	1.01023	1.01856	1.01428	0	0	0	111.211	164.186	214.299	165.107	130.491	229.291	2.18356	0	2.30757	10.6773	11.7367	3.5959		45.9153	1.86079	3.63207	0.536539	3.46814	0.000524072	0.00146453		45.9153	-2.48366	0.178791	1.47365	-1.68538	0.0919153	0.151633		45.9153	0.0988816	1.07094	0.314068	0.314841	0.752882	0.857949
AC3.5	AC3.5	11.3311	22.7461	22.8327	21.3366	18.6664	27.9144	44.4502	29.5381	29.414	77.9779	76.9082	87.634	61.217	58.9385	78.68	179.937	146.224	193.366	55.6807	54.5947	35.7673	266.932	349.753	324.83		94.8612	0.238493	1.17976	0.287426	0.829752	0.406679	0.490004		94.8612	1.22932	2.34457	0.235782	5.21381	1.85e-07	8.60048e-07		94.8612	1.38348	2.60898	0.203799	6.78847	1.13328e-11	1.31172e-09
AC3.6	col-151	3.77703	4.37424	5.70817	5.5317	5.44436	1.59511	0	0	0	2.99915	1.94704	1.9693	2.04057	3.15742	0	2.96599	3.70187	1.05664	3.27533	7.27929	4.61513	16.6091	12.9104	23.9727		4.78877	-0.146798	0.903253	0.644051	-0.22793	0.819701	0.859081		4.78877	3.62459	12.3342	1.35594	2.67311	0.00751513	0.0169392		4.78877	0.600932	1.5167	0.911862	0.659016	0.509885	NA
AH9.1	AH9.1	39.6588	33.2443	25.279	31.6097	34.2217	30.3071	33.3376	24.4454	44.6281	72.9793	52.5702	75.8182	70.3996	55.7811	54.8689	72.1724	62.0064	57.0587	33.8451	29.1172	28.8446	62.8774	58.6834	49.144		47.2041	-0.0207494	0.985721	0.248319	-0.0835594	0.933407	0.949349		47.2041	0.974332	1.96473	0.238135	4.0915	4.28585e-05	0.000146935		47.2041	0.0792676	1.05648	0.22036	0.359718	0.719058	0.835597
AH9.4	AH9.4	13.2196	16.6221	13.0473	18.1756	22.5552	23.1291	6.06138	11.2041	13.1856	12.9963	13.6293	9.84652	74.4807	51.5712	56.9395	79.093	101.801	94.0412	30.5698	23.0511	21.9219	39.1501	17.605	16.7809		32.5282	0.574522	1.48918	0.329607	1.74305	0.0813244	0.125227		32.5282	0.261183	1.19846	0.40749	0.640955	0.521552	0.622102		32.5282	0.587005	1.50213	0.244305	2.40275	0.0162722	0.0620591
B0001.1	lin-24	2221.84	1698.96	1391.16	1944	1843.31	1756.22	1315.32	1354.68	1287.12	1001.72	1145.83	1088.04	1443.7	1508.19	1487.67	1761.8	1383.57	1808.97	890.891	755.833	766.112	522.001	553.972	574.146		1312.71	0.0621933	1.04405	0.134838	0.461245	0.644623	0.711476		1312.71	-0.290359	0.817699	0.13678	-2.12282	0.0337692	0.0639238		1312.71	0.157923	1.11568	0.135804	1.16287	0.244881	0.420158
B0001.2	B0001.2	675.145	838.105	642.577	381.687	366.328	334.175	735.448	772.066	805.335	995.718	916.084	974.805	2668.04	2839.57	2822.13	2469.68	2563.55	2597.23	492.392	571.424	640.349	702.329	640.823	631.68		1169.86	-0.993994	0.502086	0.108437	-9.16654	4.88433e-20	5.95648e-18		1169.86	0.319651	1.24803	0.104969	3.04519	0.00232532	0.00583022		1169.86	-0.126504	0.916049	0.0996176	-1.2699	0.204121	0.372086
B0001.6	eri-12	4381.36	4609.58	4924.52	4912.94	4728.82	4847.54	990.026	847.439	1067.02	1286.64	1370.72	1274.14	6055.38	6619.01	6708.5	6067.42	5297.38	6527.94	1955.37	2249.3	2463.33	3313.52	3180.64	3050.53		3697.04	0.0581868	1.04116	0.0998941	0.582485	0.56024	0.639305		3697.04	0.436795	1.35359	0.1048	4.16788	3.07441e-05	0.00010754		3697.04	-0.115547	0.923032	0.0998032	-1.15775	0.246966	0.422841
B0019.1	amx-2	228.511	243.208	282.147	269.473	290.107	263.991	149.514	124.264	173.441	403.886	380.647	420.446	222.422	287.325	296.085	251.12	237.845	240.915	687.82	539.881	593.044	1084.34	1042.22	1109.94		409.274	0.125638	1.09099	0.129609	0.969361	0.332365	0.414704		409.274	1.42974	2.69397	0.137152	10.4244	1.91779e-25	4.06431e-24		409.274	-0.142411	0.906004	0.133737	-1.06486	0.286939	0.465486
B0024.10	asps-1	982.973	917.716	539.83	575.297	581.769	508.042	523.3	497.056	603.494	740.79	715.538	733.566	501.979	420.989	525.914	347.02	357.231	311.71	624.497	834.692	786.88	965.702	1104.42	987.675		653.67	-0.550511	0.682778	0.16812	-3.27452	0.00105843	0.00274919		653.67	0.43142	1.34856	0.169607	2.54364	0.0109704	0.0237738		653.67	-0.511656	0.701417	0.173334	-2.95186	0.0031587	0.0189262
B0024.11	B0024.11	1181.27	1257.16	859.488	715.17	706.989	748.106	658.67	640.672	709.993	548.845	560.748	594.73	831.531	909.337	750.566	660.426	771.84	609.683	677.994	959.653	783.419	366.587	370.879	347.604		717.557	-0.60313	0.658324	0.138992	-4.33932	1.42923e-05	5.81303e-05		717.557	-0.237505	0.848211	0.142348	-1.66848	0.0952197	0.1561		717.557	-0.286202	0.820058	0.141004	-2.02974	0.0423829	0.124019
B0024.12	gna-1	1033.02	740.997	371.847	740.458	587.213	584.608	40.4092	37.6866	31.4426	28.9918	28.2321	26.5856	165.286	153.661	143.902	124.571	200.827	164.836	82.9751	109.189	94.6102	72.3683	82.1568	70.7194		238.191	-0.165354	0.89171	0.245757	-0.672835	0.501052	0.583215		238.191	-0.386404	0.765034	0.320071	-1.20725	0.227337	0.321253		238.191	0.0837101	1.05974	0.259894	0.322094	0.747382	0.854084
B0024.15	B0024.15	22.6622	18.3718	19.5709	18.9658	27.9996	20.7364	18.1842	15.2783	14.1999	16.9952	9.73522	22.647	44.8925	32.6267	33.1284	27.6825	44.4225	42.2657	39.304	16.985	47.3051	33.2183	42.2521	25.1713		27.275	0.163515	1.12001	0.338228	0.483448	0.628778	0.700024		27.275	0.0493507	1.0348	0.381967	0.129202	0.897198	0.929325		27.275	0.047425	1.03342	0.312214	0.151899	0.879267	0.93491
B0024.8	che-12	272.891	258.955	381.632	372.204	387.327	352.519	321.253	324.92	318.483	248.93	226.831	225.485	411.174	426.252	417.211	501.252	405.355	456.47	140.839	90.9911	95.764	261.001	259.381	278.083		309.8	0.281431	1.2154	0.139811	2.01294	0.0441213	0.0731324		309.8	-0.46026	0.726855	0.14557	-3.16178	0.00156808	0.00407712		309.8	0.11909	1.08605	0.138946	0.857098	0.391391	0.569665
B0024.9	trx-2	1257.75	950.961	353.091	1003.61	913.875	1001.73	42.4297	42.7794	60.8566	51.9853	51.5966	52.1866	360.16	309.427	309.544	424.136	533.995	471.263	393.04	370.031	421.131	505.392	602.092	559.762		460.118	0.189187	1.14012	0.26044	0.726414	0.467585	0.55081		460.118	0.0927753	1.06642	0.306889	0.302309	0.762417	0.82341		460.118	0.545929	1.45996	0.264947	2.06052	0.0393487	0.117115
B0025.1	vps-34	1590.13	1908.05	2052.5	1477.75	1514.31	1426.83	1805.28	1924.05	1860.18	2432.31	2337.43	2470.49	4871.85	4791.91	4439.21	3897.31	4502.4	3960.3	1233.71	1723.98	1735.29	3454.7	3567.95	3531.18		2687.88	-0.329409	0.795863	0.114201	-2.88447	0.00392075	0.00870641		2687.88	0.373309	1.29532	0.114028	3.27382	0.00106103	0.00285462		2687.88	-0.190214	0.876476	0.112521	-1.69048	0.0909371	0.211115
B0034.1	B0034.1	101.98	106.732	153.305	116.166	118.998	133.989	32.3274	28.5196	29.414	268.924	340.733	325.92	29.5882	24.2069	45.5516	40.5352	59.23	61.2853	87.3422	50.955	58.8429	885.029	957.714	954.113		208.808	0.0240435	1.01681	0.191974	0.125244	0.900331	0.924638		208.808	3.37373	10.3656	0.230127	14.6603	1.1573e-48	6.91373e-47		208.808	0.695516	1.61946	0.248702	2.79658	0.00516461	0.0269627
B0034.3	casy-1	2632.59	3155.58	4403.45	4202.51	4497.82	4500.6	7366.6	8022.15	7133.4	7883.77	7594.44	7926.45	5551.36	6005.41	5755.03	6992.81	5090.07	7713.49	5221.97	3799.79	4147.85	5090.7	5224	5723.48		5651.47	0.373008	1.29505	0.161718	2.30654	0.0210806	0.0386158		5651.47	0.0554502	1.03918	0.16134	0.343686	0.731082	0.799009		5651.47	0.193385	1.14344	0.161486	1.19754	0.231098	0.402912
B0034.5	B0034.5	11.3311	13.1227	11.4163	11.8536	12.4443	18.3438	2.02046	4.07423	2.02855	4.99859	4.86761	14.7698	5.10142	4.20989	5.17631	6.92064	14.8075	11.6231	12.0096	19.4114	6.9227	9.49093	7.04201	17.9795		9.66525	0.248366	1.18786	0.446752	0.555936	0.578254	0.656437		9.66525	1.60226	3.03619	0.673505	2.37899	0.0173602	0.0355883		9.66525	1.20668	2.30807	0.566064	2.13171	0.0330305	0.102755
B0035.1	znf-207	6472.89	5749.51	4457.27	3993.89	3737.94	3567.46	4577.36	4565.17	4614.96	4031.86	3850.28	4039.04	2158.92	2515.41	2487.74	1819.14	1775.05	2291.86	4878.06	7776.71	6800.4	5416.95	5780.32	5297.97		4277.34	-0.561729	0.67749	0.148521	-3.78216	0.000155473	0.000492363		4277.34	-0.206694	0.866521	0.148759	-1.38946	0.164693	0.245989		4277.34	-0.283312	0.821702	0.149849	-1.89065	0.0586716	0.155576
B0035.12	sart-3	1051.9	1127.68	878.243	634.565	605.102	622.093	1027.4	1043	1047.75	833.764	799.261	836.954	758.071	841.979	712.261	743.474	653.38	653.005	1010.99	1266.6	1319.93	1440.25	1455.35	1429.97		949.707	-0.71526	0.609095	0.107496	-6.65386	2.855e-11	5.80283e-10		949.707	-0.336225	0.792111	0.107629	-3.12394	0.00178445	0.00459248		949.707	-0.173662	0.886589	0.109606	-1.58442	0.113099	0.245884
B0035.15	B0035.15	1090.62	803.986	643.393	758.633	702.323	642.031	283.875	293.344	308.34	145.959	155.763	141.79	271.395	197.865	249.498	234.313	278.566	258.877	369.021	374.883	320.752	550.474	532.846	520.207		422.031	-0.270034	0.8293	0.151015	-1.78812	0.0737564	0.114785		422.031	-0.997487	0.500872	0.168271	-5.92785	3.0692e-09	1.76409e-08		422.031	0.102605	1.07371	0.164231	0.62476	0.532129	0.696389
B0035.4	pfd-4	2465.46	2140.76	839.101	1949.53	1511.98	1863.09	244.476	217.971	214.012	103.971	121.69	129.974	1204.95	1052.47	1125.33	1157.72	1548.31	1030.23	1084.14	1353.95	1265.7	718.938	820.395	781.51		1039.4	-0.0320064	0.978059	0.243722	-0.131324	0.895519	0.920515		1039.4	-0.927456	0.525785	0.26009	-3.5659	0.000362607	0.00106426		1039.4	0.143615	1.10467	0.244837	0.586573	0.55749	0.714235
B0035.5	gspd-1	857.387	861.726	561.847	584.78	636.99	599.761	350.55	387.052	397.596	630.821	637.657	609.5	678.488	776.726	690.52	811.692	887.524	720.63	513.136	616.313	579.199	1705.99	1673.65	1893.84		777.641	-0.323263	0.79926	0.134978	-2.39494	0.016623	0.0313934		777.641	0.726276	1.65436	0.139531	5.20514	1.93854e-07	8.98456e-07		777.641	0.174173	1.12832	0.135545	1.28499	0.198797	0.365942
B0041.2	ain-2	4846.88	5730.26	6668.78	4952.45	4742.04	4353.85	4387.43	4296.27	4645.38	4584.7	3838.6	4164.09	6899.16	7159.98	6701.26	5844.97	5376.97	7817.04	7948.14	10228.6	10412.9	10634.6	10333	10706.2		6553.06	-0.295975	0.814521	0.137254	-2.15641	0.0310517	0.0539453		6553.06	-0.0826193	0.944342	0.137613	-0.600376	0.548256	0.645781		6553.06	-0.125016	0.916994	0.137215	-0.911094	0.362246	0.540958
B0041.3	lmd-2	1064.18	764.618	594.465	948.291	778.544	782.401	415.205	499.093	454.396	527.851	509.152	481.495	456.067	422.042	303.332	404.363	411.833	378.278	588.468	664.842	799.571	588.438	700.68	545.379		586.791	0.0512529	1.03616	0.179461	0.285593	0.77519	0.822512		586.791	0.149855	1.10946	0.183553	0.816416	0.414263	0.519678		586.791	0.0160444	1.01118	0.18533	0.086572	0.931012	0.965879
B0041.4	rpl-4	17274.3	17364	16257.7	16417.3	17981.2	19682.1	40586	43941.5	41431.1	31600.1	30941.4	31273.5	25410.2	27960	26620.8	26895.6	24751.6	33102.5	42291.1	36307.9	39704	37975.6	40417.6	42569.5		30364.9	0.0875705	1.06258	0.0991929	0.88283	0.377328	0.461138		30364.9	-0.42506	0.744808	0.0990536	-4.29122	1.77697e-05	6.40774e-05		30364.9	0.0833293	1.05946	0.0991174	0.840713	0.400509	0.579466
B0041.5	B0041.5	1546.7	1274.65	1069.87	969.628	982.318	935.532	989.016	932.998	985.876	882.75	868.381	843.847	639.718	669.373	605.629	561.56	695.026	565.304	1172.57	1245.97	1190.7	1034.51	1042.22	1094.35		949.938	-0.429366	0.742588	0.109835	-3.90918	9.26101e-05	0.000310188		949.938	-0.16428	0.892374	0.111993	-1.46688	0.142408	0.218172		949.938	-0.0704871	0.952316	0.115245	-0.611626	0.540785	0.702549
B0041.6	ptps-1	519.342	374.435	214.464	677.238	502.437	700.253	73.7468	73.3361	45.6424	83.9762	93.4581	98.4652	93.8661	72.6207	43.481	99.8549	126.789	139.477	40.3958	18.1982	33.4597	30.8455	35.2101	22.7741		175.574	0.763598	1.69772	0.276918	2.75749	0.00582471	0.0123957		175.574	0.517718	1.43169	0.304223	1.70177	0.0887984	0.14726		175.574	0.801243	1.7426	0.300092	2.66999	0.00758532	0.0356853
B0041.7	xnp-1	4776.06	5304.21	4206.11	3253.43	3022.4	3058.62	5172.38	4796.38	4780.28	4562.71	3401.48	3953.38	4872.87	4589.84	4358.46	2922.49	2899.49	3613.72	3717.5	5288.4	5598.15	6234.35	6086.65	5435.81		4412.72	-0.613955	0.653403	0.141154	-4.34953	1.36432e-05	5.58566e-05		4412.72	-0.307566	0.808004	0.141195	-2.1783	0.0293836	0.0565248		4412.72	-0.550845	0.68262	0.141405	-3.89552	9.79877e-05	0.00133059
B0041.8	B0041.8	4977.19	3685.74	2001.94	2162.89	1802.08	1592.72	893.044	782.251	988.919	831.765	989.098	930.496	1064.16	938.807	1085.99	946.15	1294.73	918.223	714.023	1243.55	918.411	364.214	399.047	297.261		1325.95	-0.940125	0.521188	0.238482	-3.94212	8.07646e-05	0.000275347		1325.95	0.0464554	1.03272	0.240718	0.192987	0.846969	0.891824		1325.95	0.0326289	1.02287	0.240327	0.135769	0.892004	0.941861
B0198.1	tsp-20	426.805	440.049	436.267	679.609	646.324	659.578	830.41	876.977	778.964	386.89	425.429	401.738	560.136	495.715	484.503	602.095	614.511	514.585	572.092	404.001	542.278	313.201	326.28	279.282		529.072	0.607351	1.52346	0.113806	5.33675	9.4629e-08	6.78174e-07		529.072	-1.03403	0.488343	0.115165	-8.97874	2.73897e-19	3.86256e-18		529.072	0.169322	1.12453	0.115379	1.46753	0.142233	0.288962
B0198.2	B0198.2	49.1014	73.4873	81.5453	63.2194	67.6656	76.5652	60.6138	41.7608	52.7424	77.9779	67.173	64.987	108.15	109.457	89.0326	121.605	107.354	96.1545	121.187	98.2704	98.0715	56.9456	84.5042	80.3085		81.1617	0.0156162	1.01088	0.199462	0.0782918	0.937596	0.952968		81.1617	0.437106	1.35389	0.215298	2.03023	0.042333	0.0777866		81.1617	0.0856476	1.06116	0.190625	0.4493	0.653216	0.785885
B0205.4	B0205.4	309.717	301.823	280.516	531.833	556.88	440.25	252.558	307.604	239.369	132.962	123.637	115.204	556.054	573.598	531.09	559.583	540.473	423.714	290.413	201.394	228.449	86.6047	125.583	70.7194		324.168	0.778	1.71475	0.158958	4.89439	9.86113e-07	5.35062e-06		324.168	-1.10471	0.464995	0.174087	-6.34576	2.21328e-10	1.42548e-09		324.168	-0.12335	0.918054	0.157466	-0.783343	0.433426	0.610496
B0205.6	nfs-1	1022.63	983.33	794.251	924.584	927.875	868.537	441.471	435.942	428.024	410.884	433.217	420.446	561.156	545.181	508.314	604.073	625.616	592.777	326.442	413.706	347.289	385.569	366.185	355.994		571.812	-0.0402001	0.97252	0.0977773	-0.41114	0.68097	0.742559		571.812	-0.045825	0.968736	0.107444	-0.426501	0.669743	0.748026		571.812	0.174989	1.12896	0.103777	1.68621	0.0917558	0.212273
B0205.7	kin-3	11519	10680.2	9136.34	8586.78	8038.99	7968.37	11331.8	11087	11114.4	17562	17998.5	16350.1	6066.61	5714.93	6377.22	5588.91	6113.64	6276.46	5823.54	7945.34	7235.37	8363.88	8441.03	8361.68		9320.09	-0.349395	0.784913	0.102411	-3.41168	0.000645641	0.00176708		9320.09	0.630441	1.54804	0.102301	6.1626	7.15612e-10	4.40336e-09		9320.09	-0.0143827	0.99008	0.102939	-0.139721	0.888881	0.940061
B0205.8	B0205.8	2729.85	2010.4	1182.41	1684.8	1486.31	1437.19	220.23	233.249	214.012	167.952	189.837	230.409	220.381	172.606	206.017	246.177	203.603	272.614	111.361	177.129	133.839	99.6548	130.277	76.7126		576.543	-0.361676	0.77826	0.225946	-1.60072	0.109439	0.161532		576.543	-0.182329	0.881279	0.238827	-0.763438	0.445202	0.55102		576.543	0.269067	1.20503	0.238411	1.12858	0.259075	0.435594
B0207.10	B0207.10	7.55407	9.62334	3.26181	10.2732	10.8887	8.7731	1.01023	0	0	0	2.92056	1.9693	6.1217	3.15742	1.03526	14.8299	10.1801	7.3965	3.27533	1.21321	0	2.37273	0	2.39727		4.51058	0.561561	1.47587	0.576359	0.974325	0.329895	0.412036		4.51058	2.17463	4.51471	1.41135	1.54082	0.123362	0.193337		4.51058	1.65076	3.13999	0.677685	2.43588	0.0148555	NA
B0207.12	avr-14	205.848	264.204	398.757	309.775	333.662	350.126	288.926	343.254	338.768	314.911	289.136	279.641	283.639	256.804	262.957	296.599	289.671	243.028	187.786	123.748	152.299	137.618	145.535	157.021		260.571	0.190523	1.14118	0.178283	1.06866	0.285223	0.365319		260.571	-0.135899	0.910103	0.180364	-0.75347	0.451168	0.556823		260.571	0.0464728	1.03274	0.182211	0.255049	0.798685	0.887584
B0207.2	B0207.2	33.049	31.4946	22.0172	60.0585	45.1104	49.4484	20.2046	29.5381	20.2855	29.9915	49.6496	39.3861	39.7911	38.9415	35.1989	52.3991	39.7951	39.0958	34.9369	26.6907	29.9984	22.541	58.6834	31.1645		36.6446	0.843105	1.79391	0.278259	3.02993	0.00244613	0.0058081		36.6446	0.767092	1.70184	0.304992	2.51512	0.011899	0.0255311		36.6446	0.204762	1.1525	0.283266	0.722859	0.469767	0.641968
B0207.3	gpa-14	25.495	23.6209	40.7727	45.8341	55.2214	42.2704	22.2251	17.3155	12.1713	33.9904	45.7555	39.3861	37.7505	33.6792	48.6574	64.2631	51.8262	60.2286	46.9464	25.4775	34.6135	130.5	120.888	130.651		49.5642	0.663491	1.58391	0.244814	2.71018	0.00672461	0.0140795		49.5642	1.20462	2.30477	0.293889	4.09889	4.15139e-05	0.000142906		49.5642	0.551568	1.46568	0.240796	2.2906	0.0219864	0.0769313
B0207.4	air-2	3485.26	3092.59	2084.3	1526.75	1492.53	1353.45	2567	2348.79	2435.28	2577.27	2644.08	2457.69	3169	3140.58	3202.07	2262.06	2535.78	2587.72	1581.99	2737.01	2358.33	2020.38	2124.34	1838.71		2400.96	-0.985917	0.504905	0.166465	-5.92268	3.16739e-09	3.5035e-08		2400.96	0.0629726	1.04462	0.166369	0.378512	0.70505	0.777728		2400.96	-0.365005	0.776466	0.166222	-2.19588	0.0281003	0.0911511
B0207.6	B0207.6	1126.5	838.105	471.332	511.287	500.881	373.256	357.622	330.012	334.711	266.924	251.169	257.979	198.955	142.084	181.171	182.903	229.516	157.44	144.115	234.15	196.143	204.055	215.955	202.569		329.535	-0.813249	0.569099	0.227184	-3.5797	0.000343993	0.00101145		329.535	-0.39767	0.759083	0.233209	-1.70521	0.0881556	0.14629		329.535	0.127151	1.09214	0.239618	0.530642	0.595667	0.743895
B0207.7	B0207.7	0.944258	0.874849	2.44636	0	1.55553	0.797555	1.01023	1.01856	1.01428	8.99745	9.73522	9.84652	3.06085	2.10495	4.14105	2.96599	0.925468	2.11329	1.09178	2.42643	2.30757	0	2.34734	3.5959		2.72173	-0.88103	0.54298	1.14793	-0.767492	0.442789	NA		2.72173	3.23159	9.39305	0.985089	3.28051	0.0010362	0.00279474		2.72173	-0.648723	0.637845	0.884434	-0.733489	0.46326	NA
B0207.9	B0207.9	0	0	0	0	0	0	0	0	1.01428	0	2.92056	1.9693	2.04057	1.05247	0	0	0.925468	3.16993	0	0	0	1.18637	0	0		0.594956	0	1	2.42616	0	1	NA		0.594956	2.16761	4.49278	2.21756	0.977475	0.328334	0.433305		0.594956	0.389811	1.31022	2.07719	0.187662	0.851141	NA
B0212.1	otpl-1	60.4325	66.4885	114.979	111.424	110.443	129.204	124.258	144.635	107.513	133.962	145.055	153.606	86.7241	101.037	102.491	137.424	100.876	101.438	284.954	206.247	227.295	209.987	198.35	185.788		139.359	0.529029	1.44296	0.201567	2.62458	0.00867569	0.0176527		139.359	0.201047	1.14953	0.196981	1.02064	0.307425	0.410929		139.359	0.227469	1.17078	0.204796	1.11071	0.266694	0.442991
B0212.2	sre-5	1.88852	0.874849	0.815453	0.790243	0	3.19022	0	1.01856	1.01428	2.99915	1.94704	0.984652	4.08113	14.7346	6.21158	8.89796	7.40374	13.7364	0	1.21321	0	4.74546	0	1.19863		3.2394	0.167927	1.12344	1.12186	0.149687	0.881012	0.909246		3.2394	1.54467	2.91737	1.30857	1.18042	0.237832	0.333228		3.2394	0.260619	1.19799	0.693219	0.375954	0.706951	NA
B0212.5	osm-9	43.4359	52.4909	104.378	58.478	58.3325	74.1726	126.279	116.115	136.927	73.9791	85.6699	79.7568	126.515	152.609	156.325	162.141	150.851	120.457	60.0478	43.6757	66.9194	72.3683	52.8151	75.514		93.7605	-0.0787218	0.946896	0.243836	-0.322847	0.746811	0.798897		93.7605	-0.663726	0.631246	0.236518	-2.80623	0.00501242	0.0117738		93.7605	-0.00513186	0.996449	0.22695	-0.0226123	0.98196	0.993679
B0218.1	faah-1	381.48	307.072	373.478	394.331	463.549	421.109	122.238	122.227	128.813	404.885	390.382	405.677	214.26	206.285	240.181	287.701	247.1	264.161	162.675	88.5647	99.2253	507.765	546.93	541.783		305.078	0.268481	1.20454	0.135966	1.97463	0.0483106	0.0792849		305.078	1.68581	3.2172	0.151156	11.1528	6.94071e-29	1.78008e-27		305.078	0.273485	1.20872	0.146032	1.87278	0.0610994	0.15992
B0218.2	faah-2	182.242	175.845	185.923	205.463	159.442	181.842	319.233	302.511	329.64	366.896	346.574	396.815	531.568	532.552	684.309	522.014	568.237	481.829	281.679	339.7	244.602	527.933	526.977	544.18		372.417	0.0067227	1.00467	0.1396	0.048157	0.961591	0.971517		372.417	0.222741	1.16695	0.131141	1.69849	0.0894155	0.148089		372.417	-0.152523	0.899676	0.125193	-1.2183	0.22311	0.394023
B0218.7	B0218.7	0	0	0.815453	0	0.777766	0.797555	2.02046	0	2.02855	10.9969	2.92056	3.93861	1.02028	1.05247	2.07053	1.97732	2.7764	5.28321	1.09178	0	0	0	1.17367	0		1.69756	0.742717	1.67332	1.70193	0.436397	0.662548	NA		1.69756	2.13574	4.39463	1.05068	2.03273	0.0420797	0.077396		1.69756	1.26517	2.40355	1.09322	1.15729	0.247155	NA
B0228.1	B0228.1	73.6521	38.4934	34.249	100.361	70.7767	85.3383	0	3.05567	2.02855	3.99887	8.76169	9.84652	2.04057	1.05247	3.10579	0.988662	3.70187	2.11329	15.2849	2.42643	6.9227	62.8774	65.7255	70.7194		27.8134	0.815591	1.76002	0.317257	2.57076	0.0101477	0.0202382		27.8134	2.15888	4.46567	0.767125	2.81425	0.00488918	0.0115122		27.8134	0.1508	1.11019	0.852491	0.176894	0.859592	0.921748
B0228.4	cpna-2	1476.82	2245.74	4574.69	3023.47	3541.95	3156.72	5999.76	6227.45	5763.12	6521.15	5244.36	6988.07	4679.02	5434.97	4958.91	5106.44	2925.4	5001.09	1782.87	1191.38	1370.69	1885.14	1659.57	2095.21		3868.92	0.228406	1.17154	0.268265	0.85142	0.394536	0.477928		3868.92	0.0599409	1.04242	0.267962	0.223692	0.822997	0.872444		3868.92	-0.209857	0.864623	0.268101	-0.782753	0.433772	0.610712
B0228.5	trx-1	75.5407	71.7376	63.6053	94.0389	92.5542	93.3139	8.08185	3.05567	5.07138	7.99774	7.78817	5.90791	13.2637	6.31484	5.17631	12.8526	12.0311	7.3965	125.554	95.844	108.456	73.5547	78.6358	105.48		48.8855	0.410991	1.3296	0.195768	2.09937	0.0357839	0.0608866		48.8855	0.418513	1.33655	0.498496	0.839552	0.40116	0.507543		48.8855	0.388956	1.30945	0.416838	0.93311	0.350763	0.529765
B0228.7	B0228.7	1379.56	812.735	581.418	997.287	865.654	796.757	334.386	343.254	421.939	381.892	389.409	357.429	447.904	429.409	357.166	363.828	427.566	448.017	257.66	260.841	296.522	601.488	586.834	592.126		530.462	-0.0595628	0.959555	0.202766	-0.293752	0.768947	0.817171		530.462	0.0377585	1.02652	0.208748	0.180881	0.856461	0.899553		530.462	0.00559903	1.00389	0.207959	0.0269237	0.978521	0.992531
B0238.10	natc-2	3502.25	2760.15	2412.93	5190.32	4544.49	4955.21	1968.94	1898.59	1998.12	3282.07	3569.9	3283.81	2287.48	2268.08	2460.82	3479.1	3425.16	3476.35	3146.5	3053.66	2958.3	5883.19	6134.77	6217.32		3506.56	0.760377	1.69393	0.101355	7.50212	6.27949e-14	2.78054e-12		3506.56	0.78911	1.72801	0.102532	7.69625	1.40114e-14	1.3288e-13		3506.56	0.565071	1.47946	0.102256	5.52606	3.27498e-08	1.82299e-06
B0238.11	B0238.11	12646.5	8815.85	5779.93	6331.43	5874.47	5156.19	3953.03	3691.25	4139.26	3139.11	3390.78	3330.09	3843.41	3695.24	3402.91	3170.64	3447.37	2888.86	3137.77	4001.18	4181.31	2275.45	2349.69	2002.92		4360.19	-0.649795	0.637371	0.183381	-3.54342	0.000394977	0.00114151		4360.19	-0.257112	0.836761	0.183995	-1.39739	0.162298	0.243014		4360.19	-0.202706	0.868919	0.184067	-1.10126	0.270782	0.44733
B0238.12	B0238.12	22.6622	33.2443	66.0517	35.5609	46.666	52.6386	15.1535	16.2969	14.1999	297.916	352.415	328.874	30.6085	29.4693	27.9521	65.2517	66.6337	100.381	18.5602	8.4925	24.2294	438.956	451.863	477.057		125.88	0.130791	1.09489	0.273711	0.477843	0.632762	0.702974		125.88	4.4231	21.4529	0.31028	14.2552	4.16233e-46	2.22392e-44		125.88	1.39579	2.63133	0.285146	4.89501	9.82997e-07	3.41334e-05
B0238.9	B0238.9	843.223	885.347	689.873	415.668	391.216	368.47	835.461	668.173	866.192	915.741	868.381	871.417	871.322	892.498	1333.42	531.9	664.486	697.384	776.254	1415.82	873.414	323.878	320.412	274.487		733.102	-1.04071	0.486089	0.196171	-5.30511	1.12606e-07	7.89519e-07		733.102	0.164189	1.12054	0.194922	0.842334	0.399601	0.506055		733.102	-0.709824	0.611395	0.195231	-3.63581	0.000277111	0.00296289
B0240.2	spe-42	14.1639	9.62334	4.89272	7.11219	3.88883	3.19022	3.03069	2.03711	3.04283	6.99802	9.73522	8.86187	1672.24	1736.58	2251.7	1242.75	1552.01	1279.59	9.826	7.27929	9.23026	2.37273	3.52101	8.39044		410.503	-0.986536	0.504688	0.45604	-2.16327	0.0305205	0.0531093		410.503	1.65906	3.15811	0.606447	2.73571	0.00622462	0.0143066		410.503	-0.474137	0.719897	0.168572	-2.81267	0.00491326	0.0261705
B0244.2	ida-1	1297.41	1386.64	1997.86	1872.09	2153.63	2259.47	3664.11	3991.72	3586.48	5463.45	4986.38	5230.47	4755.54	5443.39	5442.38	7114.41	5217.79	6723.42	1327.6	895.353	914.95	2033.43	2436.54	2237.85		3434.68	0.424413	1.34203	0.164708	2.57676	0.00997323	0.0199438		3434.68	0.480011	1.39475	0.163695	2.93235	0.00336411	0.00817537		3434.68	0.284805	1.21825	0.163473	1.74221	0.0814715	0.195256
B0250.1	rpl-2	16297	16115.6	14778.5	15763	18653.9	19906.2	22847.4	23917.7	22964.2	17545	18054.9	18159	16662.2	18519.3	16368.5	18057.9	15329.5	17370.2	41235.4	34152	39414.4	38121.5	40488.1	44327.9		23543.7	0.203079	1.15115	0.0988339	2.05475	0.0399036	0.0668716		23543.7	-0.37526	0.770967	0.0988314	-3.79697	0.000146476	0.000461318		23543.7	-0.0223782	0.984608	0.0989022	-0.226266	0.820994	0.900429
B0250.2	calf-1	276.668	169.721	153.305	361.141	316.551	370.065	247.507	260.75	227.198	256.927	279.401	231.393	144.88	136.822	126.302	169.061	184.168	154.27	520.778	407.64	516.895	421.16	435.431	427.913		283.164	0.809556	1.75267	0.165788	4.88309	1.04437e-06	5.6474e-06		283.164	0.0620569	1.04395	0.168544	0.368194	0.712729	0.783578		283.164	0.316167	1.24502	0.179449	1.76188	0.0780899	0.18981
B0250.5	B0250.5	1696.83	1370.89	845.625	1119.77	1052.32	1041.61	1804.27	1732.56	1875.4	3802.92	4047.9	3790.91	428.519	392.573	441.022	329.225	455.33	431.11	1253.36	1398.84	1196.47	3444.02	3634.85	4007.04		1733.06	-0.283415	0.821644	0.168546	-1.68152	0.092661	0.139996		1733.06	1.10501	2.15101	0.167321	6.60416	3.99778e-11	2.72763e-10		1733.06	-0.0539793	0.963276	0.175593	-0.307411	0.75853	0.861424
B0250.9	dhcr-7	114.255	124.229	171.245	139.083	142.331	179.45	535.422	559.188	507.138	411.883	441.005	375.152	259.152	285.22	335.425	309.451	335.019	232.461	496.759	399.148	398.055	472.174	472.989	469.865		340.254	0.164911	1.1211	0.168225	0.980304	0.326936	0.409096		340.254	-0.383225	0.766722	0.152591	-2.51144	0.0120238	0.0257406		340.254	-0.00248554	0.998279	0.158404	-0.0156912	0.987481	0.996638
B0252.1	B0252.1	40.6031	40.243	63.6053	67.9609	115.109	66.197	64.6548	66.2062	63.8994	28.9918	30.1792	37.4168	54.075	50.5187	84.8916	135.447	107.354	122.571	74.2409	50.955	58.8429	27.2864	23.4734	26.37		62.5455	0.781895	1.71939	0.248851	3.14202	0.00167786	0.0041481		62.5455	-1.01158	0.496003	0.273581	-3.69756	0.000217684	0.000665145		62.5455	0.946261	1.92687	0.244504	3.87013	0.000108778	0.00142663
B0252.2	asm-1	1101.01	1016.57	614.036	590.311	526.548	469.76	280.844	299.456	266.755	396.888	327.103	360.383	212.219	227.334	235.005	217.506	206.379	234.575	164.858	206.247	200.758	421.16	386.137	457.878		392.488	-0.782835	0.581223	0.164675	-4.75381	1.99614e-06	1.01638e-05		392.488	0.356197	1.28005	0.172625	2.06342	0.0390729	0.0726497		392.488	-0.035561	0.975652	0.17816	-0.199602	0.841792	0.911681
B0252.3	B0252.3	121.809	139.101	110.902	143.034	137.665	127.609	128.299	101.856	130.842	270.923	275.507	240.255	223.442	261.013	245.357	244.2	189.721	184.912	96.0764	123.748	86.5337	376.078	315.717	390.755		194.39	0.136323	1.0991	0.156628	0.870364	0.384102	0.467113		194.39	1.12362	2.17893	0.155101	7.24444	4.3423e-13	3.59662e-12		194.39	-0.237409	0.848267	0.147927	-1.6049	0.108515	0.239133
B0252.4	cyn-10	3336.06	2340.22	1220.73	1657.93	1308.98	1355.84	355.601	309.641	351.954	287.918	301.792	275.703	416.276	440.986	460.692	354.93	543.25	368.768	613.579	969.359	799.571	366.587	406.089	292.467		797.289	-0.673739	0.62688	0.243993	-2.76131	0.00575704	0.0122712		797.289	-0.233136	0.850784	0.251663	-0.926379	0.354249	0.460931		797.289	-0.0562425	0.961766	0.249298	-0.225603	0.82151	0.900549
B0252.5	B0252.5	4.72129	0.874849	1.63091	0.790243	2.3333	1.59511	0	1.01856	0	0	0.973522	0	0	2.10495	4.14105	0	0.925468	0	0	0	1.15378	0	0	3.5959		1.07746	-0.598142	0.660604	1.27948	-0.467487	0.640151	NA		1.07746	-0.041012	0.971973	1.95176	-0.0210128	0.983235	0.991073		1.07746	-2.55226	0.170488	1.66366	-1.53412	0.124999	NA
B0252.8	B0252.8	17.9409	19.2467	8.96998	28.4487	19.4442	47.8533	26.266	30.5567	38.5425	66.981	72.0406	51.2019	158.144	128.402	138.725	236.29	204.528	264.161	49.13	24.2643	32.3059	40.3365	37.5574	43.1508		74.3537	1.06346	2.08994	0.318394	3.34008	0.000837542	0.00223314		74.3537	0.996397	1.99501	0.277968	3.58457	0.000337632	0.00099403		74.3537	0.727967	1.6563	0.228764	3.18218	0.00146171	0.0105373
B0261.7	B0261.7	3796.86	2838.01	1679.83	1409.79	1255.31	1126.94	346.509	252.602	393.539	191.946	197.625	237.301	245.888	211.547	324.037	174.005	240.622	185.969	129.922	224.445	141.915	30.8455	35.2101	39.5549		654.593	-1.13248	0.456131	0.244179	-4.63791	3.51944e-06	1.66563e-05		654.593	-0.663124	0.63151	0.253715	-2.61366	0.00895781	0.0198664		654.593	-0.379004	0.768968	0.255261	-1.48477	0.137605	0.281858
B0272.2	memb-1	1250.2	846.854	582.234	804.467	678.212	622.093	571.791	644.746	687.679	489.861	518.887	490.357	285.679	263.118	253.639	256.064	304.479	178.573	185.602	226.871	220.373	117.45	124.409	131.85		447.312	-0.347297	0.786056	0.203301	-1.70829	0.0875832	0.133511		447.312	-0.345062	0.787274	0.205783	-1.67682	0.0935776	0.153907		447.312	-0.116663	0.922318	0.212932	-0.547891	0.583767	0.734569
B0272.3	B0272.3	2355.92	2344.59	1887.77	1862.6	1931.19	1900.57	3451.96	3496.7	3545.91	2859.19	2700.55	2794.44	5799.29	5902.27	5144.22	5530.58	5512.09	6791.04	2814.6	4052.14	4093.62	3152.18	3236.98	3133.23		3595.57	-0.210107	0.864473	0.12573	-1.67109	0.094704	0.142727		3595.57	-0.329084	0.796042	0.125257	-2.62727	0.00860727	0.0191562		3595.57	0.0821185	1.05857	0.124443	0.659889	0.509325	0.676626
B0272.4	B0272.4	629.82	397.181	355.538	848.721	708.545	638.841	215.179	215.934	172.427	115.967	135.32	114.22	447.904	407.307	346.813	377.669	509.007	311.71	265.302	242.643	192.682	251.51	228.865	214.556		347.653	0.669029	1.59	0.200299	3.34014	0.000837348	0.00223314		347.653	-0.723333	0.605696	0.217166	-3.33078	0.000866019	0.00237287		347.653	-0.00313529	0.997829	0.203866	-0.0153792	0.98773	0.996751
B0273.4	unc-5	1288.91	1732.2	1921.21	1752.76	1979.41	1978.73	3454.99	3797.18	3171.64	2453.31	2214.76	2415.35	1549.81	1518.72	1492.85	1388.08	1085.57	1329.26	2845.17	2671.5	2982.53	2421.37	2201.8	2199.49		2160.28	0.207891	1.155	0.124801	1.66577	0.0957591	0.14388		2160.28	-0.557383	0.679534	0.12414	-4.48997	7.12345e-06	2.71723e-05		2160.28	-0.262782	0.833479	0.126227	-2.08183	0.0373581	0.113403
B0280.1	ggtb-1	1618.46	1183.67	824.423	926.955	923.986	900.439	441.471	511.315	483.81	558.842	606.504	563.221	58.1562	74.7256	50.7279	60.3084	79.5902	52.8321	482.566	599.328	507.664	563.524	599.745	601.715		553.082	-0.397682	0.759077	0.176298	-2.25574	0.0240872	0.0433231		553.082	0.266985	1.20329	0.180657	1.47785	0.139448	0.214212		553.082	0.0763604	1.05435	0.228848	0.333672	0.738627	0.8486
B0280.12	glr-2	80.262	103.232	131.288	112.214	125.22	130.001	155.576	135.468	147.07	134.962	103.193	150.652	49.9939	67.3583	67.2921	90.9569	71.261	57.0587	85.1587	66.7268	71.5345	461.496	490.594	391.954		145.022	0.217793	1.16295	0.189196	1.15115	0.24967	0.3263		145.022	-0.172739	0.887157	0.188806	-0.914903	0.360243	0.466888		145.022	0.251635	1.19056	0.215883	1.16561	0.243774	0.419245
B0280.13	viro-2	137.862	121.604	194.078	159.629	180.442	189.02	192.954	217.971	193.727	216.939	167.446	191.022	448.925	490.453	455.516	586.277	447.001	544.171	337.359	356.685	356.519	595.556	534.019	566.954		328.422	0.218031	1.16315	0.152892	1.42605	0.153855	0.216725		328.422	-0.0719522	0.95135	0.152708	-0.471174	0.637516	0.722024		328.422	0.176745	1.13033	0.13825	1.27844	0.201093	0.36823
B0280.3	rpia-1	1673.23	1282.53	791.805	1008.35	972.208	894.059	300.039	312.697	313.411	358.898	361.177	364.321	14.284	14.7346	17.5995	18.7846	32.3914	5.28321	242.375	332.421	201.912	209.987	282.854	255.309		427.527	-0.382147	0.767295	0.238255	-1.60394	0.108728	0.160641		427.527	0.227588	1.17088	0.244701	0.930063	0.352338	0.459232		427.527	0.302001	1.23285	0.371168	0.813652	0.415845	0.594602
B0280.7	B0280.7	101.98	97.1082	88.8844	138.293	158.664	182.64	80.8185	74.3546	66.9422	64.9816	90.5375	53.1712	61.217	67.3583	56.9395	61.2971	76.8138	52.8321	64.4149	27.9039	35.7673	16.6091	28.1681	15.5823		73.4699	0.737007	1.66671	0.216115	3.41025	0.000649024	0.00177438		73.4699	-0.0892637	0.940002	0.237212	-0.376304	0.706691	0.778746		73.4699	0.046314	1.03262	0.24354	0.19017	0.849176	0.916459
B0280.8	nhr-10	1130.28	1062.07	965.497	946.711	906.097	796.757	1151.66	1251.81	1146.13	1425.6	1390.19	1392.3	1041.71	1148.25	1189.52	958.014	915.288	803.049	443.262	401.574	476.512	562.338	626.739	604.112		947.311	-0.252407	0.839495	0.0961795	-2.62433	0.00868196	0.0176607		947.311	0.24551	1.18551	0.0955758	2.56874	0.0102068	0.0223084		947.311	-0.335787	0.792352	0.0972613	-3.45242	0.000555583	0.00496484
B0285.1	cdk-12	1287.02	1957.04	2749.71	1208.28	1275.54	1113.39	3693.4	3574.12	3747.75	3299.07	2908.88	3285.78	3096.56	3063.75	3592.36	2339.18	2200.76	2784.25	2899.76	4422.17	3615.96	2111.73	1927.16	2176.72		2680.43	-0.737008	0.599982	0.189214	-3.89511	9.81542e-05	0.000326844		2680.43	-0.214468	0.861864	0.188278	-1.1391	0.254661	0.352446		2680.43	-0.413251	0.750929	0.188529	-2.19197	0.0283814	0.0916793
B0285.4	lcmt-1	2061.32	1586.1	898.629	1128.47	1067.09	1000.93	646.548	599.93	575.094	943.733	1016.36	922.619	769.294	738.837	873.762	644.608	931.021	632.929	859.229	1311.49	966.87	495.901	423.694	429.111		896.815	-0.507634	0.703375	0.212321	-2.39089	0.0168078	0.0317022		896.815	0.662247	1.58255	0.214558	3.08656	0.00202489	0.00515012		896.815	-0.1085	0.927552	0.214482	-0.505868	0.612949	0.755515
B0285.5	hse-5	2380.48	2355.97	1868.2	1699.81	1605.31	1464.31	1876	1872.11	1857.14	2424.31	2402.65	2353.32	1471.25	1478.73	1703.01	1136.96	1351.18	1555.38	966.223	1312.7	1168.78	518.442	588.008	513.016		1580.14	-0.469368	0.722281	0.12663	-3.7066	0.000210056	0.000647579		1580.14	0.35726	1.28099	0.126794	2.81764	0.0048378	0.0114024		1580.14	-0.202853	0.868831	0.128014	-1.58462	0.113053	0.245864
B0285.7	mnp-1	3935.67	5321.71	6562.77	4277.58	4126.05	4018.88	6875.63	7740.01	6792.61	5386.48	4844.24	5363.4	9764.11	10508.9	8038.82	7468.36	7434.28	8852.55	2738.18	3257.48	3584.8	3495.03	3908.32	3657.03		5748.04	-0.348988	0.785134	0.148737	-2.34634	0.0189588	0.0351444		5748.04	-0.45717	0.728414	0.148679	-3.07489	0.00210582	0.00533095		5748.04	-0.253205	0.83903	0.148452	-1.70563	0.0880762	0.206711
B0286.1	B0286.1	751.63	654.387	698.028	967.257	934.097	890.869	523.3	559.188	517.281	303.914	358.256	337.736	592.785	512.555	517.631	612.971	515.486	859.051	473.832	422.199	484.589	513.697	509.372	441.098		581.3	0.408519	1.32732	0.138301	2.95384	0.00313843	0.00723034		581.3	-0.677783	0.625125	0.14506	-4.67242	2.97668e-06	1.19114e-05		581.3	0.290436	1.22301	0.141553	2.05179	0.0401904	0.118844
B0286.2	lat-2	148.249	180.219	324.55	241.024	286.996	266.383	244.476	259.732	202.855	462.869	428.35	421.431	453.006	476.771	533.16	770.168	568.237	757.613	362.47	240.217	250.371	495.901	518.762	523.803		392.4	0.279348	1.21365	0.211313	1.32197	0.18618	0.254969		392.4	0.892549	1.85645	0.210584	4.23845	2.25064e-05	8.00918e-05		392.4	0.518404	1.43237	0.205557	2.52195	0.0116706	0.0483259
B0286.3	paic-1	186.963	179.344	217.726	269.473	266.774	298.285	38.3888	56.0206	34.4854	50.9856	31.1527	48.2479	234.665	250.489	289.874	282.757	296.15	306.426	63.3231	115.255	117.686	92.5366	107.978	119.863		164.785	0.513752	1.42776	0.173491	2.96127	0.00306376	0.00708025		164.785	0.0154939	1.0108	0.239055	0.0648133	0.948323	0.969059		164.785	0.191866	1.14224	0.173542	1.10559	0.268904	0.445514
B0286.4	ntl-2	5846.85	6153.69	5775.85	4318.68	4440.27	4606.68	5208.75	5643.82	5337.12	3565.99	3256.43	3717.06	7832.72	8647.12	8315.23	7081.79	8298.67	6767.8	7305.08	9623.22	9173.73	6331.64	6574.89	6357.56		6257.53	-0.411433	0.751876	0.0984639	-4.17852	2.93412e-05	0.000110797		6257.53	-0.619287	0.650992	0.0989679	-6.25746	3.91306e-10	2.46377e-09		6257.53	-0.162721	0.893339	0.0982321	-1.65649	0.0976224	0.221488
B0286.6	try-9	8.49832	12.2479	6.52363	9.48291	7.77766	13.5584	6.06138	3.05567	4.0571	15.9955	13.6293	14.7698	6.1217	13.6822	3.10579	6.92064	11.1056	7.3965	7.64244	6.06607	6.9227	15.4228	10.563	13.185		9.32466	0.179222	1.13227	0.445715	0.402101	0.68761	0.748045		9.32466	1.75103	3.366	0.533505	3.28213	0.00103025	0.00278168		9.32466	0.164966	1.12114	0.503098	0.327901	0.742987	0.850661
B0302.5	B0302.5	321.048	280.826	337.598	418.829	441.771	396.385	630.384	651.876	669.422	496.859	526.675	575.037	416.276	424.147	388.224	534.866	432.194	536.775	958.581	587.196	743.036	429.465	419	430.31		501.949	0.419826	1.33777	0.141358	2.96994	0.00297856	0.00690694		501.949	-0.287871	0.81911	0.138196	-2.08306	0.0372459	0.0696707		501.949	0.290678	1.22321	0.140921	2.06271	0.0391405	0.116636
B0303.11	B0303.11	146.36	160.972	247.082	176.224	198.33	237.671	351.56	371.773	289.069	303.914	314.447	327.889	623.393	584.123	512.455	484.445	530.293	524.095	81.8833	76.4325	69.227	100.841	98.5882	106.678		288.239	0.138507	1.10077	0.166155	0.833603	0.404505	0.487821		288.239	-0.0974262	0.934699	0.160923	-0.60542	0.5449	0.642848		288.239	-0.160559	0.894678	0.155676	-1.03137	0.302368	0.480632
B0303.15	mrpl-11	2441.85	1681.46	1137.56	1790.69	1582.75	1622.23	701.1	695.674	698.836	408.884	450.741	393.861	440.762	428.357	390.294	396.454	471.989	318.049	383.214	317.862	319.598	379.637	448.342	376.371		761.524	-0.0741082	0.949929	0.187713	-0.394796	0.692994	0.752581		761.524	-0.741375	0.598169	0.192885	-3.84361	0.000121235	0.000385666		761.524	-0.0849352	0.942827	0.194955	-0.435665	0.66308	0.794214
B0303.16	B0303.16	4.72129	0.874849	1.63091	3.95121	3.11106	2.39266	11.1125	14.2598	16.2284	10.9969	17.5234	9.84652	2.04057	2.10495	3.10579	0.988662	1.85094	1.05664	18.5602	13.3454	6.9227	20.1682	22.2997	21.5754		8.77786	0.428095	1.34546	0.719215	0.595225	0.551693	0.631391		8.77786	-0.114813	0.923502	0.434526	-0.264226	0.791606	0.847814		8.77786	-0.87801	0.544118	0.950247	-0.923981	0.355496	0.534491
B0303.2	anmt-1	786.567	594.022	515.366	979.901	872.653	837.432	229.322	203.711	238.355	119.966	131.425	110.281	1225.36	1145.09	981.429	1820.13	2059.17	2081.59	240.191	183.195	207.681	158.973	185.44	164.213		669.644	0.506112	1.42022	0.142262	3.5576	0.000374255	0.00108974		669.644	-0.892322	0.538746	0.165774	-5.38275	7.33565e-08	3.61634e-07		669.644	0.830508	1.77831	0.140188	5.92424	3.13749e-09	2.35862e-07
B0303.3	B0303.3	4282.21	4322.63	3605.93	3809.76	3650.83	3744.52	4076.28	4146.54	4282.27	6385.19	6689.07	6109.77	5046.32	5249.74	5452.73	4628.92	4816.14	4387.18	1549.23	2038.2	1677.6	1301.44	1481.17	1499.49		3926.38	-0.123817	0.917756	0.0956506	-1.29447	0.195503	0.265683		3926.38	0.617396	1.5341	0.0955441	6.4619	1.03398e-10	6.77448e-10		3926.38	-0.187102	0.878368	0.095597	-1.9572	0.0503242	0.138949
B0303.4	B0303.4	1854.52	1927.29	1939.15	1322.08	1392.2	1236.21	845.563	847.439	839.82	784.778	755.453	790.675	898.87	906.18	779.553	852.227	802.381	684.705	290.413	350.619	298.83	724.87	713.591	691.612		938.71	-0.534287	0.6905	0.0865667	-6.17197	6.74431e-10	8.95909e-09		938.71	-0.119901	0.920251	0.0920488	-1.30258	0.192719	0.280537		938.71	-0.142829	0.905741	0.09205	-1.55165	0.120746	0.257161
B0303.7	B0303.7	780.902	777.741	773.865	719.121	678.212	760.867	632.404	627.431	582.194	822.767	745.718	768.028	272.416	314.69	321.967	367.782	330.392	347.635	391.948	468.301	401.516	1624.14	1510.51	1610.96		692.98	-0.11213	0.925221	0.0853399	-1.31392	0.188873	0.258319		692.98	0.342906	1.26831	0.0881126	3.89168	9.95542e-05	0.000321822		692.98	0.201978	1.15027	0.100405	2.01163	0.0442594	0.12715
B0303.9	vps-33.1	390.923	386.683	287.04	346.917	314.217	354.114	598.057	572.429	572.052	698.802	745.718	699.103	298.943	347.316	400.647	272.871	297.075	288.463	393.04	484.073	520.356	748.597	710.07	743.153		477.944	-0.066594	0.95489	0.128524	-0.518146	0.604357	0.679057		477.944	0.298899	1.2302	0.123905	2.41232	0.0158514	0.0328849		477.944	-0.285916	0.82022	0.132824	-2.15259	0.031351	0.0988896
B0304.2	B0304.2	1801.64	1026.2	559.401	625.082	574.769	522.398	475.819	324.92	482.795	363.897	398.17	422.416	602.987	529.394	830.281	473.569	722.79	434.28	12.0096	47.3154	20.7681	21.3546	28.1681	31.1645		472.15	-0.975403	0.508598	0.322622	-3.02336	0.00249981	0.0059242		472.15	-0.115866	0.922828	0.325529	-0.35593	0.721893	0.791474		472.15	-0.266991	0.831051	0.323967	-0.824133	0.409864	0.588101
B0304.3	cyp-23A1	221.901	195.091	199.786	390.38	402.105	379.636	328.325	338.161	296.169	342.903	355.335	309.181	1341.67	1394.53	1118.08	1188.37	1157.76	1036.57	216.172	171.063	168.452	90.1638	102.109	86.3017		492.926	0.927776	1.90234	0.121824	7.61569	2.62289e-14	1.27527e-12		492.926	0.0656385	1.04655	0.121279	0.541219	0.588357	0.680052		492.926	-0.18789	0.877889	0.107921	-1.741	0.0816836	0.195405
B0304.8	sra-35	10.3868	4.37424	2.44636	7.90243	2.3333	1.59511	2.02046	3.05567	0	6.99802	3.89409	0.984652	1.02028	0	2.07053	0.988662	2.7764	4.22657	0	0	0	0	0	0		2.37807	-0.527006	0.693994	0.900033	-0.585541	0.558184	NA		2.37807	1.22491	2.33741	1.07395	1.14057	0.254049	0.351811		2.37807	1.35657	2.56076	1.23212	1.101	0.270896	NA
B0310.1	B0310.1	233.232	211.713	342.49	330.322	356.217	361.292	174.77	199.637	195.755	215.939	216.122	174.283	102.028	114.72	108.703	101.832	131.416	108.834	238.008	180.769	214.604	150.669	133.798	143.836		197.541	0.409611	1.32833	0.15804	2.59181	0.00954728	0.0192004		197.541	0.0888006	1.06349	0.167876	0.528965	0.59683	0.687332		197.541	0.0745172	1.05301	0.18366	0.405735	0.684937	0.810956
B0334.1	ttr-18	232.288	225.711	192.447	312.936	337.55	338.163	57.5832	62.132	35.4997	570.838	704.83	644.947	187.732	169.448	256.745	416.227	429.417	689.988	100.444	83.7118	66.9194	1212.47	1694.78	1449.15		436.331	0.604868	1.52084	0.205006	2.95049	0.00317266	0.00729566		436.331	3.62938	12.3752	0.228535	15.8811	8.56543e-57	6.63122e-55		436.331	1.32148	2.49922	0.205941	6.41677	1.392e-10	1.30134e-08
B0334.11	ooc-3	1442.83	1267.66	756.741	706.477	731.1	630.068	974.873	868.829	1041.66	910.742	877.143	961.02	46.933	34.7316	43.481	37.5692	29.615	12.6797	198.704	383.376	226.141	233.714	198.35	244.521		535.79	-0.745357	0.59652	0.231279	-3.22277	0.00126958	0.00322446		535.79	-0.0699074	0.952699	0.231618	-0.301822	0.762788	0.823694		535.79	-0.638844	0.642227	0.308187	-2.07291	0.0381807	0.114846
B0334.15	emc-5	2514.56	1921.17	1852.71	1735.37	1692.42	1599.1	1068.82	1051.15	1001.09	1150.67	1277.26	1133.33	614.211	586.228	572.5	440.943	420.162	291.633	1591.81	2169.23	2129.88	2135.46	2154.86	1946.58		1377.13	-0.322694	0.799575	0.14105	-2.2878	0.0221491	0.0402657		1377.13	0.190387	1.14107	0.143285	1.32873	0.183937	0.27019		1377.13	-0.619431	0.650928	0.149262	-4.14996	3.32537e-05	0.000562613
B0334.4	B0334.4	5565.46	3824.84	2368.89	3179.94	2543.29	2313.71	442.481	483.814	505.109	963.727	1232.48	1021.08	161.205	179.973	154.254	144.345	188.795	104.608	1013.17	1381.85	1238.01	936.043	1044.57	957.709		1331.22	-0.548889	0.683546	0.223283	-2.45827	0.0139608	0.0268775		1331.22	1.16846	2.24772	0.227174	5.14346	2.69728e-07	1.22321e-06		1331.22	-0.175528	0.885444	0.24196	-0.72544	0.468182	0.640883
B0334.5	B0334.5	1735.55	1606.22	1545.28	1283.35	1259.98	1292.84	1752.75	1788.59	1791.21	2494.29	2721.97	2404.52	47.9533	49.4663	40.3753	39.5465	27.764	27.4727	1357.08	1788.28	1709.91	2046.48	2002.28	1990.93		1366.84	-0.348988	0.785135	0.098232	-3.55269	0.000381314	0.00110804		1366.84	0.515147	1.42914	0.0975341	5.28171	1.27983e-07	6.08402e-07		1366.84	-0.539465	0.688026	0.214913	-2.51015	0.0120678	0.0496046
B0334.6	B0334.6	157.691	191.592	187.554	298.712	310.329	261.598	268.721	301.493	255.598	176.95	201.519	167.391	179.57	173.658	159.43	160.163	136.044	199.705	88.434	46.1022	48.4589	28.4728	29.3417	34.7604		169.304	0.696299	1.62034	0.164668	4.22849	2.35263e-05	9.03055e-05		169.304	-0.597036	0.661111	0.167773	-3.55859	0.000372848	0.00109262		169.304	-0.0513712	0.965019	0.173783	-0.295605	0.767532	0.867254
B0336.1	wrm-1	1766.71	2066.39	2053.31	1480.92	1617.75	1335.11	5362.31	5278.16	5165.71	4543.71	4099.5	4360.04	3153.7	3181.63	3306.63	2519.11	2505.24	2781.08	2031.8	2960.24	2844.07	2407.14	2506.96	2375.69		2987.62	-0.409037	0.753126	0.115515	-3.54098	0.000398647	0.00115032		2987.62	-0.281632	0.82266	0.113818	-2.4744	0.0133459	0.0283073		2987.62	-0.304981	0.809453	0.114677	-2.65947	0.00782636	0.0364198
B0336.11	hpo-28	378.648	405.055	481.933	542.897	591.88	564.669	503.095	479.74	468.595	319.909	381.62	320.012	4586.17	3999.4	3326.3	4369.89	4879.99	4020.53	829.751	602.968	670.348	505.392	529.325	511.817		1427.91	0.423969	1.34161	0.1375	3.08342	0.00204634	0.00496178		1427.91	-0.506526	0.703915	0.141285	-3.58514	0.000336896	0.000992634		1427.91	0.155904	1.11412	0.129748	1.20159	0.229522	0.400976
B0336.13	B0336.13	3562.69	2407.58	1325.93	1667.41	1450.53	1377.38	705.141	644.746	747.521	643.818	636.683	620.331	1729.38	1522.93	1759.95	1381.16	1903.69	1375.75	435.619	550.8	539.97	447.26	463.599	441.098		1180.87	-0.698376	0.616266	0.218288	-3.19933	0.00137749	0.00347361		1180.87	-0.141989	0.906269	0.221631	-0.640653	0.521748	0.622211		1180.87	-0.104765	0.929956	0.218876	-0.47865	0.632187	0.770501
B0336.6	abi-1	2834.66	2642.04	1808.68	1567.05	1532.98	1489.83	2681.15	2553.52	2717.25	2253.36	2331.58	2349.38	2278.29	2069.16	2007.37	2004.02	2343.28	2184.08	1318.87	1737.32	1670.68	2809.32	2733.47	2791.62		2196.21	-0.666117	0.630201	0.130899	-5.0888	3.60341e-07	2.18466e-06		2196.21	-0.197543	0.872035	0.130719	-1.5112	0.130737	0.2033		2196.21	0.0395895	1.02782	0.131075	0.302036	0.762624	0.863384
B0336.7	B0336.7	1098.17	1120.68	697.212	579.248	536.659	545.527	647.558	653.913	663.336	499.859	468.264	477.556	949.884	938.807	1068.39	872.989	950.456	912.939	267.486	287.532	308.06	188.632	179.571	195.377		629.505	-0.810597	0.570146	0.133604	-6.06715	1.302e-09	1.57233e-08		629.505	-0.442703	0.735755	0.136855	-3.23483	0.00121714	0.00322656		629.505	-0.111806	0.925429	0.133107	-0.839976	0.400922	0.579903
B0336.8	lgg-3	3256.75	2298.23	1308.8	2112.32	1739.08	1681.25	254.578	243.435	293.126	175.95	204.44	173.299	342.815	271.538	265.027	261.996	387.771	285.294	232.549	323.928	316.136	173.209	213.608	207.364		709.27	-0.310723	0.806237	0.227378	-1.36655	0.171767	0.238124		709.27	-0.514748	0.699915	0.239818	-2.14641	0.03184	0.0606808		709.27	0.0892344	1.06381	0.236204	0.377786	0.70559	0.825013
B0336.9	swp-1	951.812	1161.8	1431.94	714.38	697.656	670.743	2266.96	2120.63	2454.55	2001.43	1692.95	1970.29	1199.85	1228.24	1255.77	807.737	784.797	859.051	896.349	1161.05	1161.86	984.684	931.893	969.695		1265.67	-0.768397	0.587069	0.127749	-6.01492	1.79974e-09	2.11171e-08		1265.67	-0.272506	0.82788	0.12525	-2.1757	0.0295777	0.0568548		1265.67	-0.587786	0.665363	0.128229	-4.58389	4.5641e-06	0.00012191
B0344.2	wrt-9	463.631	616.768	1217.47	726.233	941.875	936.329	5344.12	5940.22	5271.19	4045.85	3975.86	4031.16	3994.41	4538.27	4373.99	5824.21	4158.13	7271.82	5325.69	4418.53	4046.32	841.134	784.011	752.743		3326.67	0.179717	1.13266	0.237143	0.757842	0.448546	0.531242		3326.67	-0.457936	0.728027	0.234755	-1.9507	0.051093	0.0917931		3326.67	0.418759	1.33678	0.234731	1.784	0.0744244	0.183345
B0348.5	B0348.5	92.5373	105.857	101.116	188.078	164.109	191.413	3493.38	2877.42	4106.8	2889.18	2758.96	2871.24	256.091	297.85	254.675	432.045	303.553	361.372	326.442	183.195	194.989	52.2001	59.8571	47.9454		942.097	0.858841	1.81358	0.195318	4.39713	1.09689e-05	4.59966e-05		942.097	-0.298497	0.813099	0.171697	-1.73851	0.082121	0.137691		942.097	0.439624	1.35625	0.183258	2.39894	0.0164427	0.0622858
B0348.6	ife-3	2914.93	2359.47	1430.3	1454.84	1457.53	1571.18	3283.25	2683.9	3895.83	2709.23	2590.54	2728.47	4301.51	3939.41	6154.64	2894.8	4176.64	2613.08	5655.41	9732.41	6318.11	3114.21	3017.5	2973.81		3498.79	-0.580303	0.668823	0.233775	-2.48231	0.0130534	0.0253735		3498.79	-0.296945	0.813974	0.233414	-1.27218	0.203308	0.293362		3498.79	-0.571756	0.672797	0.233184	-2.45195	0.0142084	0.0560353
B0353.1	B0353.1	2715.69	2735.65	3314	3572.69	3819.61	3810.72	4108.61	4533.6	3939.45	3440.03	3464.76	3488.62	4330.08	5009.77	4287.02	4574.54	3967.48	5010.6	6022.25	5463.11	5766.61	6597.38	6401.19	6713.55		4461.96	0.353707	1.27784	0.0986412	3.58579	0.000336057	0.000990464		4461.96	-0.275643	0.826082	0.0986934	-2.79292	0.00522343	0.012215		4461.96	-0.00807665	0.994417	0.0984148	-0.0820674	0.934593	0.968047
B0361.3	B0361.3	1395.61	1307.9	941.848	1004.4	1027.43	970.624	756.663	812.808	764.764	635.82	649.339	667.594	1045.79	1068.26	1202.98	858.159	1012.46	884.41	1098.33	1287.22	1196.47	1596.85	1634.92	1374.83		1049.81	-0.279031	0.824144	0.122816	-2.27195	0.0230896	0.0417612		1049.81	-0.257404	0.836592	0.126455	-2.03554	0.0417968	0.0769878		1049.81	-0.267391	0.83082	0.124231	-2.15238	0.0313675	0.0988896
B0361.4	B0361.4	29.272	37.6185	44.0345	41.8829	40.4438	49.4484	65.665	64.1691	67.9565	134.962	144.081	131.943	114.272	114.72	101.456	112.708	99.0251	108.834	67.6902	48.5286	61.1505	141.178	125.583	155.823		87.6018	0.237568	1.179	0.203124	1.16957	0.242175	0.317771		87.6018	1.05526	2.07809	0.167765	6.2901	3.17265e-10	2.01262e-09		87.6018	-0.0452427	0.969127	0.15947	-0.283707	0.776635	0.872608
B0361.5	psd-1	1176.55	1111.93	793.436	1223.3	1025.1	1140.5	882.942	888.181	918.934	2101.41	2323.8	2003.77	2079.34	2167.04	2046.71	2065.32	2184.1	1616.66	451.996	470.727	503.049	893.334	1014.05	1003.26		1336.89	0.137811	1.10023	0.132847	1.03737	0.299564	0.380412		1336.89	1.25697	2.38994	0.132947	9.45473	3.23857e-21	5.16198e-20		1336.89	-0.100981	0.932399	0.131395	-0.768531	0.442172	0.618871
B0361.6	B0361.6	2335.15	1874.8	1098.42	1019.41	999.429	807.125	871.829	841.328	874.306	662.812	708.724	698.118	459.128	428.357	424.458	364.816	476.616	337.069	300.239	382.163	340.366	242.019	234.734	250.515		709.664	-0.909001	0.532554	0.18707	-4.85916	1.17886e-06	6.27293e-06		709.664	-0.322128	0.799889	0.189413	-1.70066	0.0890067	0.147541		709.664	-0.15375	0.898911	0.193547	-0.794377	0.426976	0.605035
B0361.7	pho-5	584.496	572.151	519.444	433.053	423.105	460.987	359.642	355.476	395.568	648.816	699.962	668.579	341.795	259.961	375.8	233.324	299.852	191.252	140.839	173.49	170.76	308.455	289.896	305.652		383.848	-0.34727	0.78607	0.135634	-2.56034	0.010457	0.0208161		383.848	0.861064	1.81638	0.137761	6.2504	4.09393e-10	2.56488e-09		383.848	-0.429028	0.742762	0.145261	-2.95349	0.00314201	0.0188485
B0361.8	algn-11	1524.98	1449.62	1029.92	953.823	965.985	918.783	626.343	639.654	610.594	538.847	537.384	557.313	3178.18	3080.59	3204.14	3147.9	3418.68	3372.8	1729.38	2470.11	2120.65	1797.34	1677.17	1789.56		1722.49	-0.495704	0.709215	0.12739	-3.89124	9.97352e-05	0.000331663		1722.49	-0.200102	0.870489	0.13257	-1.50941	0.131194	0.203886		1722.49	0.0708755	1.05035	0.125015	0.566937	0.570757	0.72508
B0361.9	B0361.9	375.815	265.954	283.778	446.487	342.217	414.728	358.632	417.608	401.653	586.834	630.842	584.883	214.26	198.918	215.335	259.03	252.653	249.368	993.518	850.464	857.261	974.007	856.778	896.579		496.983	0.381071	1.30231	0.128127	2.97416	0.00293788	0.00683178		496.983	0.613967	1.53046	0.126518	4.8528	1.21733e-06	5.10099e-06		496.983	0.275983	1.21082	0.138607	1.99112	0.0464674	0.131377
B0365.3	eat-6	8317.97	11022.2	18096.5	12658.1	14226.1	15127.2	23338.4	25852	22916.6	27828.1	26401.9	28267.4	32002.2	35885.1	37646.3	40125.8	25023.7	37667.2	41558.5	33459.3	32008.2	42505.1	43978.5	46617.3		28438.7	0.166262	1.12215	0.201947	0.823298	0.410339	0.494031		28438.7	0.194211	1.1441	0.201863	0.962095	0.336002	0.441811		28438.7	-0.0376379	0.974249	0.201829	-0.186484	0.852065	0.917707
B0365.7	dhc-3	32.1048	30.6197	66.0517	48.9951	74.6655	57.4239	93.9515	127.32	130.842	69.9802	68.1465	78.7722	49.9939	58.9385	46.5868	80.0816	53.6771	61.2853	78.608	67.94	69.227	62.8774	41.0784	65.9249		67.2955	0.481717	1.3964	0.258687	1.86216	0.0625808	0.099474		67.2955	-0.698919	0.616034	0.243409	-2.87137	0.00408693	0.009797		67.2955	0.326047	1.25357	0.261201	1.24826	0.211934	0.380834
B0379.1	B0379.1	161.468	154.848	195.709	256.829	246.552	264.788	122.238	121.208	128.813	830.765	887.852	858.616	337.714	305.217	398.576	500.263	463.659	749.16	152.849	107.976	134.993	329.81	332.148	361.988		350.168	0.583451	1.49843	0.166148	3.51162	0.000445377	0.00127136		350.168	2.79147	6.92333	0.168445	16.5719	1.11186e-61	1.01635e-59		350.168	0.716208	1.64286	0.158684	4.51344	6.37851e-06	0.000159835
B0379.4	scpl-1	1162.38	1433	1984	1092.12	1246.76	1217.07	2899.36	2790.85	3055	4513.72	4347.75	4631.8	853.977	876.711	930.701	1040.07	716.312	1027.06	1348.35	1201.08	1100.71	1422.45	1252.3	1428.77		1815.51	-0.365523	0.776188	0.156765	-2.33166	0.0197183	0.0363892		1815.51	0.625671	1.54293	0.155268	4.02962	5.58681e-05	0.000188136		1815.51	0.0640811	1.04542	0.158952	0.403149	0.686839	0.812002
B0393.1	rps-0	23868	19804.8	16039.1	22162.4	24585.2	24913.2	26551.9	28328.1	27369.2	21104	21174.1	21747	22090.2	24326.9	22429	22561.3	19999.4	21561.9	28355.7	22613.1	25541.3	24122.4	25265.6	27934.2		23518.7	0.263225	1.20016	0.117154	2.24683	0.0246509	0.044145		23518.7	-0.361363	0.778429	0.117172	-3.08404	0.00204207	0.00518862		23518.7	-0.10255	0.931386	0.117196	-0.875025	0.38156	0.560503
B0393.2	rbg-3	1969.72	2208.12	2037.82	1161.66	1066.32	1037.62	1072.87	1014.48	1144.1	1084.69	1030.96	1053.58	1684.49	1809.2	2444.26	1588.78	1375.25	1673.72	1277.38	1908.39	1464.15	1064.17	1003.49	1027.23		1425.1	-0.9286	0.525368	0.139577	-6.65295	2.87272e-11	5.82293e-10		1425.1	-0.0280782	0.980726	0.141372	-0.198612	0.842566	0.887854		1425.1	-0.356804	0.780892	0.139617	-2.5556	0.0106004	0.045276
B0393.3	B0393.3	4426.68	4797.67	4512.72	2096.51	1929.64	1722.72	4548.06	4068.12	4662.63	4382.76	4162.78	4151.29	3883.2	3966.77	4228.01	2585.35	3009.62	2279.18	311.157	656.349	533.048	276.423	275.812	302.056		2823.69	-1.25672	0.418494	0.164139	-7.65643	1.91175e-14	9.67452e-13		2823.69	-0.0646635	0.956168	0.163841	-0.394673	0.693084	0.76743		2823.69	-0.61701	0.652021	0.164206	-3.75755	0.000171585	0.00203447
B0393.7	B0393.7	73.6521	79.6112	94.5926	101.941	110.443	118.836	2.02046	4.07423	5.07138	0	4.86761	0.984652	0	0	0	0.988662	0	0	3.27533	1.21321	2.30757	1.18637	2.34734	0		25.3089	0.415781	1.33402	0.22594	1.84022	0.0657352	0.103911		25.3089	-0.916488	0.529797	0.758308	-1.2086	0.226818	0.320638		25.3089	0.894643	1.85915	1.67747	0.53333	0.593805	0.742072
B0393.9	B0393.9	147.304	101.482	97.8544	195.98	174.997	214.542	15.1535	14.2598	24.3426	19.9943	11.6823	17.7237	578.501	550.444	994.888	346.032	425.715	448.017	48.0382	31.5436	41.5362	69.9956	83.3305	64.7263		196.587	0.759044	1.69237	0.231216	3.28284	0.00102768	0.00267867		196.587	-0.124016	0.91763	0.355312	-0.349035	0.727063	0.795763		196.587	-0.800221	0.574261	0.219277	-3.64937	0.000262889	0.00283159
B0395.1	nhx-1	160.524	156.598	141.889	252.087	234.108	227.303	83.8492	91.6701	72.0136	27.9921	20.444	45.294	142.84	150.504	145.972	111.719	140.671	105.664	192.153	132.24	173.067	143.55	107.978	101.884		131.751	0.637551	1.55569	0.166152	3.83714	0.000124474	0.000404703		131.751	-1.40171	0.378479	0.227506	-6.16123	7.21817e-10	4.43436e-09		131.751	-0.291699	0.816939	0.178805	-1.63139	0.102809	0.230459
B0395.2	mboa-1	573.165	553.779	654.809	963.306	954.319	1114.18	1515.35	1600.15	1347.97	525.851	657.127	553.374	850.916	823.034	752.636	1005.47	1123.52	807.275	784.988	515.616	546.893	242.019	215.955	293.665		790.641	0.766461	1.70109	0.157064	4.87992	1.0613e-06	5.71275e-06		790.641	-1.36197	0.38905	0.157345	-8.65598	4.88708e-18	6.26322e-17		790.641	0.275628	1.21052	0.157139	1.75404	0.0794245	0.192349
B0395.3	B0395.3	1248.31	1525.74	2117.73	1344.99	1338.54	1494.62	1197.12	1334.31	1236.4	989.72	948.21	1070.32	1098.85	1315.59	991.782	1103.35	1020.79	966.828	952.03	924.47	1026.87	1221.96	1332.11	1155.48		1206.5	-0.228176	0.853714	0.145586	-1.56729	0.117047	0.171096		1206.5	-0.324814	0.798401	0.147213	-2.20643	0.0273541	0.053051		1206.5	-0.13992	0.90757	0.147407	-0.949205	0.342516	0.521861
B0399.1	kcnl-1	89.7045	97.1082	225.065	97.9901	121.331	135.584	48.4911	50.9278	64.9137	86.9754	80.8023	103.388	106.109	133.664	129.408	124.571	95.3232	99.3244	464.006	283.892	309.214	379.637	362.664	373.974		169.336	-0.219219	0.85903	0.262517	-0.835066	0.403681	0.48718		169.336	0.722521	1.65006	0.283344	2.54998	0.0107729	0.0233995		169.336	-0.209703	0.864715	0.268634	-0.780628	0.435022	0.612035
B0403.2	ubc-17	35.8818	57.74	86.438	60.0585	79.3321	58.2215	3916.66	4189.32	3777.16	5163.54	5289.14	4971.51	46.933	48.4138	65.2216	65.2517	65.7082	75.0216	138.656	148.012	156.914	236.087	233.56	248.117		1217.2	0.119774	1.08656	0.191393	0.625802	0.531445	0.612553		1217.2	0.376281	1.29799	0.13645	2.75766	0.00582174	0.0134745		1217.2	0.357132	1.28088	0.204311	1.74798	0.0804671	0.193716
B0403.3	B0403.3	20.7737	11.373	17.1245	17.3853	17.1109	27.9144	6.06138	10.1856	5.07138	7.99774	9.73522	7.87722	5.10142	4.20989	2.07053	6.92064	8.32921	1.05664	42.5793	29.1172	24.2294	61.691	58.6834	73.1167		19.8215	0.344311	1.26954	0.348153	0.988965	0.32268	0.404588		19.8215	0.266424	1.20282	0.486741	0.547363	0.584129	0.675784		19.8215	0.551357	1.46546	0.608405	0.906233	0.364812	0.543455
B0403.5	B0403.5	562.778	503.038	696.397	912.731	993.985	1069.52	395	386.033	402.668	3470.02	3607.87	3449.24	584.622	559.916	636.687	924.399	819.965	1196.12	764.244	476.793	539.97	3000.32	3525.7	2783.23		1344.22	0.755491	1.68821	0.161756	4.67056	3.0038e-06	1.45857e-05		1344.22	3.15273	8.89338	0.162959	19.3468	2.1684e-83	3.57645e-81		1344.22	0.722489	1.65003	0.162754	4.43916	9.031e-06	0.000205794
B0403.6	B0403.6	20.7737	20.9964	17.1245	38.7219	27.2218	40.6753	15.1535	4.07423	12.1713	58.9833	69.12	39.3861	36.7302	30.5217	22.7758	42.5125	49.0498	30.6426	79.6998	66.7268	65.7656	92.5366	100.936	111.473		45.5738	0.859236	1.81408	0.28741	2.98958	0.00279357	0.00654737		45.5738	2.41399	5.32945	0.339937	7.10127	1.23615e-12	9.76949e-12		45.5738	0.446957	1.36316	0.277208	1.61235	0.106885	0.236754
B0410.2	vang-1	2054.71	2118.01	1854.34	1484.87	1393.76	1300.01	2888.25	3013.91	2898.8	2925.17	2939.06	2732.41	2139.53	2198.62	1989.78	1814.2	1930.53	1500.43	1049.2	1614.79	1699.52	1607.53	1592.67	1569.01		2012.88	-0.528292	0.693375	0.133475	-3.95799	7.55845e-05	0.000259232		2012.88	-0.0338856	0.976786	0.132658	-0.255436	0.798386	0.853389		2012.88	-0.270393	0.829094	0.133616	-2.02366	0.0430048	0.125036
B0412.1	dac-1	43.4359	35.8688	31.8027	52.9463	40.4438	43.8655	70.7162	74.3546	38.5425	87.9751	81.7758	77.7875	80.6024	73.6732	70.3979	87.0023	64.7828	72.9084	46.9464	27.9039	44.9975	26.1001	16.4314	17.9795		54.5517	0.310338	1.24	0.243971	1.27203	0.203363	0.274368		54.5517	0.430854	1.34803	0.225535	1.91036	0.0560866	0.0995623		54.5517	-0.0013854	0.99904	0.223255	-0.00620544	0.995049	1
B0412.2	daf-7	24.5507	20.9964	21.2018	10.2732	13.9998	7.17799	153.555	141.579	160.256	257.927	220.989	247.148	16.3245	14.7346	16.5642	27.6825	12.9566	12.6797	117.912	81.2854	88.8413	308.455	262.902	291.268		105.469	-1.07827	0.473596	0.312941	-3.4456	0.000569786	0.00157746		105.469	0.672717	1.59407	0.161097	4.17586	2.96864e-05	0.000104033		105.469	0.162496	1.11922	0.319848	0.508042	0.611424	0.7544
B0414.2	rnt-1	159.58	189.842	199.786	271.844	297.107	252.027	551.586	543.909	445.267	272.923	252.142	235.332	172.428	229.439	191.524	194.766	247.1	150.043	221.631	150.439	151.146	136.432	134.972	124.658		240.663	0.578467	1.49326	0.17292	3.34529	0.000821954	0.00219709		240.663	-1.01893	0.493483	0.169262	-6.01982	1.7461e-09	1.03175e-08		240.663	0.000335271	1.00023	0.178009	0.00188345	0.998497	1
B0414.5	cpb-3	1461.71	1655.21	1392.79	508.916	470.548	421.109	2216.45	1641.91	2318.63	1355.62	1217.88	1437.59	1768.15	1632.39	2427.69	896.717	932.872	1120.04	912.726	1546.85	1062.63	284.728	264.076	251.713		1216.62	-1.68695	0.310582	0.182484	-9.24437	2.3662e-20	3.03486e-18		1216.62	-0.622943	0.649345	0.180491	-3.45139	0.000557707	0.00158893		1216.62	-0.982798	0.505997	0.181086	-5.42724	5.72316e-08	2.89815e-06
B0414.7	mtk-1	1958.39	2299.1	2341.17	1864.18	1760.08	1685.23	1364.82	1437.18	1222.2	1417.6	1449.57	1419.87	1478.39	1518.72	1380.01	1268.45	1122.59	1341.94	491.3	565.358	549.201	1067.73	1072.73	1032.02		1379.49	-0.314006	0.804405	0.0908195	-3.45747	0.000545273	0.00151637		1379.49	0.0913058	1.06533	0.0930889	0.980845	0.326669	0.431408		1379.49	-0.23033	0.85244	0.0933116	-2.4684	0.0135719	0.0542875
B0414.8	vps-51	866.829	1021.82	786.912	683.56	637.768	661.173	1029.43	1019.58	997.033	1316.63	1331.78	1122.5	1403.91	1328.22	1398.64	1139.93	1279	1027.06	643.057	800.722	853.799	2003.77	1997.58	2082.03		1143.03	-0.432263	0.741099	0.114974	-3.75965	0.000170151	0.000534074		1143.03	0.307976	1.23797	0.113778	2.70681	0.00679331	0.015501		1143.03	-0.260884	0.834576	0.11326	-2.30341	0.0212558	0.0754611
B0416.1	tmc-2	411.697	598.397	953.265	745.199	765.322	764.855	1215.31	1431.07	1075.13	678.808	676.598	798.553	949.884	1091.42	940.019	1037.11	804.232	1090.46	1565.61	1152.55	1459.54	1096.2	1118.51	1088.36		979.503	0.211484	1.15788	0.203067	1.04144	0.297669	0.378394		979.503	-0.788885	0.578791	0.202744	-3.89104	9.98159e-05	0.000322531		979.503	-0.0244458	0.983198	0.202513	-0.120712	0.903919	0.949083
B0416.3	B0416.3	14.1639	12.2479	8.15453	22.1268	24.1107	12.7609	8.08185	9.16701	13.1856	14.9958	11.6823	16.7391	41.8316	27.3643	38.3047	51.4104	48.1243	45.4356	19.652	6.06607	6.9227	22.541	18.7787	21.5754		21.476	0.78566	1.72388	0.360404	2.17994	0.0292618	0.0511876		21.476	0.511833	1.42586	0.406896	1.2579	0.208429	0.299498		21.476	0.430701	1.34789	0.288323	1.49381	0.135225	0.278233
B0416.7	B0416.7	7.55407	2.62455	5.70817	5.5317	3.11106	3.19022	1.01023	1.01856	1.01428	13.996	18.4969	20.6777	2.04057	6.31484	1.03526	4.94331	2.7764	10.5664	15.2849	13.3454	5.76891	315.573	313.37	346.405		46.7232	-0.414756	0.750146	0.537059	-0.772273	0.439953	0.523064		46.7232	4.12827	17.4878	0.875477	4.71546	2.4117e-06	9.76389e-06		46.7232	0.935445	1.91248	0.616858	1.51647	0.129401	0.26929
B0432.10	B0432.10	1193.54	901.969	470.516	569.765	490.77	499.269	524.31	447.146	554.809	482.863	548.093	510.05	237.726	276.801	251.569	201.687	280.417	182.799	251.109	395.508	334.597	225.41	221.823	231.336		428.495	-0.717362	0.608208	0.227964	-3.14682	0.00165055	0.00408872		428.495	0.0138909	1.00967	0.230038	0.0603853	0.951849	0.971308		428.495	-0.202734	0.868903	0.236882	-0.855842	0.392085	0.569993
B0432.13	trul-1	1033.96	859.976	753.479	516.819	461.215	402.765	1399.17	1212.08	1440.27	1109.69	972.548	1046.68	104.069	97.8801	127.337	80.0816	125.864	112.004	687.82	1036.09	827.262	594.369	603.266	462.673		669.474	-0.938477	0.521783	0.168481	-5.57021	2.54427e-08	2.10298e-07		669.474	-0.372851	0.772255	0.166385	-2.2409	0.0250328	0.049114		669.474	-0.0493813	0.966351	0.198808	-0.248388	0.803835	0.889733
B0432.2	djr-1.1	3883.73	2502.94	1429.49	2154.99	1676.09	1781.74	378.837	347.328	421.939	339.904	380.647	377.122	148.961	141.031	136.655	140.39	181.392	152.157	277.312	310.583	336.905	333.369	393.179	389.556		775.677	-0.477423	0.71826	0.220529	-2.1649	0.0303957	0.0529416		775.677	-0.0647634	0.956102	0.227629	-0.284512	0.776018	0.835102		775.677	0.152473	1.11147	0.239802	0.63583	0.524887	0.690382
B0432.3	mrpl-41	1667.56	1147.8	530.86	1417.7	1217.2	1244.19	313.172	345.291	293.126	276.922	301.792	307.211	532.588	499.925	436.881	565.515	635.797	554.737	246.742	266.907	279.215	409.296	436.605	393.152		596.674	0.213912	1.15983	0.230973	0.926135	0.354376	0.437326		596.674	-0.10309	0.931037	0.238566	-0.432124	0.665651	0.744393		596.674	0.257276	1.19522	0.234563	1.09683	0.272715	0.449206
B0432.4	misc-1	2438.07	1880.93	1440.91	1596.29	1408.53	1359.83	1326.43	1246.71	1375.36	1899.46	1986.96	1924.01	545.852	590.438	600.452	609.016	704.281	555.794	717.298	886.86	770.727	666.738	712.417	749.147		1166.35	-0.399602	0.758067	0.142838	-2.7976	0.00514842	0.0111108		1166.35	0.557342	1.47156	0.143517	3.88347	0.000102978	0.0003319		1166.35	0.106777	1.07682	0.148501	0.719032	0.472121	0.644098
B0432.5	cat-2	30.2163	33.2443	39.9572	27.6585	38.8883	42.2704	55.5627	50.9278	63.8994	59.983	53.5437	51.2019	73.4604	77.8831	86.9621	89.9683	80.5157	86.6447	106.994	88.5647	63.4581	83.0456	82.1568	92.2949		64.9709	0.0670243	1.04755	0.22969	0.291804	0.770437	0.81852		64.9709	-0.0492897	0.966412	0.212057	-0.232436	0.8162	0.867055		64.9709	0.108849	1.07837	0.192815	0.564525	0.572397	0.725844
B0432.7	B0432.7	559.001	820.608	1021.76	695.414	734.989	707.431	1705.27	1735.62	1632.98	1082.69	926.793	1085.09	2135.45	2350.17	2484.63	2195.82	1970.32	2056.23	1238.08	1114.94	1167.63	798.424	819.221	789.9		1326.19	-0.169213	0.889327	0.142804	-1.18493	0.236044	0.311115		1326.19	-0.713406	0.609878	0.141225	-5.05156	4.38226e-07	1.93191e-06		1326.19	-0.16377	0.892689	0.139663	-1.17261	0.240953	0.415567
B0454.5	B0454.5	23.6065	9.62334	4.07727	35.5609	24.1107	26.3193	13.133	26.4825	21.2998	15.9955	11.6823	16.7391	0	0	3.10579	0	2.7764	0	0	0	1.15378	2.37273	4.69468	3.5959		10.2637	1.2254	2.3382	0.487199	2.51519	0.011897	0.0233575		10.2637	-0.455939	0.729036	0.499522	-0.912749	0.361375	0.468115		10.2637	-0.0790322	0.946692	1.24951	-0.0632506	0.949567	0.976883
B0457.1	lat-1	3969.66	5932.35	6101.22	4430.1	4867.26	4336.3	6470.53	6608.4	6134.34	4713.67	4062.51	4295.05	6733.87	6543.23	7400.06	4982.86	4716.18	5030.68	5289.66	6376.66	5861.22	4107.2	4004.56	4048.99		5292.36	-0.231391	0.851813	0.124359	-1.86066	0.0627918	0.0997241		5292.36	-0.555728	0.680314	0.124489	-4.46406	8.04205e-06	3.04315e-05		5292.36	-0.489348	0.712347	0.124398	-3.93372	8.364e-05	0.00118198
B0457.2	B0457.2	76.4849	72.6125	123.949	153.307	141.553	151.535	22.2251	35.6495	36.5139	184.948	227.804	196.93	114.272	87.3553	96.2795	125.56	201.752	161.666	69.8738	46.1022	49.6127	826.897	945.977	949.319		212.424	0.703727	1.62871	0.203985	3.4499	0.000560785	0.00155428		212.424	2.6921	6.46253	0.23877	11.2749	1.74672e-29	4.66632e-28		212.424	0.715901	1.64251	0.206672	3.46395	0.000532297	0.00483376
B0457.6	B0457.6	237.953	192.467	212.018	432.263	367.883	500.067	278.824	248.528	275.883	1229.65	1320.1	1183.55	644.819	647.271	682.238	1140.92	1059.66	1143.29	597.202	471.941	535.355	1934.96	2032.79	2159.94		813.732	1.01833	2.02557	0.120899	8.423	3.66973e-17	3.17431e-15		813.732	2.21652	4.64772	0.116993	18.9458	4.77896e-80	7.2516e-78		813.732	0.759907	1.69338	0.110534	6.87488	6.20424e-12	7.54022e-10
B0464.2	ctr-9	4229.33	4596.46	4113.96	2781.65	2683.29	2496.35	5059.24	4708.79	4863.45	4323.78	3628.32	4439.8	3419.99	3549.99	3664.83	2616.99	2682.01	2666.97	849.403	1296.93	1082.25	1144.84	1199.49	942.127		3043.34	-0.70071	0.615269	0.12096	-5.79291	6.91786e-09	6.80714e-08		3043.34	-0.239705	0.846918	0.120805	-1.98423	0.0472299	0.0856847		3043.34	-0.416862	0.749052	0.121431	-3.43292	0.000597124	0.00523345
B0464.3	nlp-36	2753.46	2066.39	1277	2546.16	2113.97	2651.87	360.652	345.291	381.368	218.938	256.036	223.516	503	455.721	422.387	606.05	601.554	502.962	418.151	291.172	316.136	167.278	160.793	149.829		824.57	0.262599	1.19964	0.192353	1.36519	0.172193	0.238627		824.57	-0.638325	0.642458	0.203359	-3.13891	0.00169577	0.00437911		824.57	0.308936	1.23879	0.198094	1.55954	0.118868	0.254786
B0464.4	bre-3	812.062	862.601	768.157	682.77	797.988	751.296	1414.32	1280.33	1571.11	1732.51	1589.76	1711.33	1017.22	1034.58	1279.58	1061.82	889.375	1208.8	381.03	359.112	335.751	639.451	694.812	690.414		981.925	-0.129943	0.913868	0.120435	-1.07894	0.280612	0.36057		981.925	0.238741	1.17996	0.118	2.02323	0.0430491	0.0789454		981.925	-0.0770763	0.947977	0.119671	-0.64407	0.51953	0.686317
B0464.5	spk-1	7249.07	7805.4	8472.56	6502.91	6565.12	6472.95	6097.75	6502.47	6116.08	4900.61	4629.1	4863.2	5566.67	5878.07	5572.82	4894.87	4787.45	4905.99	4426.07	4750.95	4533.21	5033.75	4885.98	5162.52		5690.65	-0.268046	0.830444	0.0604435	-4.43465	9.22203e-06	3.93816e-05		5690.65	-0.378956	0.768994	0.0612139	-6.19069	5.99024e-10	3.69796e-09		5690.65	-0.22224	0.857233	0.0613166	-3.62447	0.000289552	0.00306446
B0464.6	B0464.6	3373.83	3460.03	2647.78	1825.46	1740.64	1498.61	8672.83	8808.48	8839.42	8462.6	8409.28	8332.12	2316.04	2282.82	2805.56	1741.03	1800.96	1565.94	1019.72	1977.54	1376.46	761.647	701.854	671.235		3545.5	-0.904529	0.534207	0.165182	-5.47596	4.35145e-08	3.38249e-07		3545.5	-0.0625464	0.957572	0.164103	-0.381141	0.703099	0.775801		3545.5	-0.53552	0.68991	0.165719	-3.23149	0.00123147	0.00934072
B0464.7	baf-1	14096.8	9095.8	4758.98	6093.56	5041.48	5176.93	5409.79	4779.07	5649.52	6350.2	6534.28	5982.75	10731.3	8949.18	9014.03	9658.24	10736.4	11352.6	4254.66	9317.49	8225.32	5860.65	5519.76	5329.13		7413.25	-0.776934	0.583606	0.260904	-2.97785	0.00290276	0.00675869		7413.25	0.252457	1.19123	0.26105	0.967085	0.333501	0.439055		7413.25	0.145844	1.10638	0.260854	0.559101	0.576093	0.729318
B0464.8	tag-342	2927.2	2087.39	1302.28	1367.91	1132.43	962.648	613.21	489.926	646.094	544.846	536.41	514.973	469.33	432.567	504.173	302.531	484.02	381.448	212.897	297.238	249.217	467.428	456.557	338.015		738.364	-0.866863	0.548338	0.22283	-3.89024	0.000100145	0.000332879		738.364	-0.132079	0.912516	0.226677	-0.582673	0.560114	0.656105		738.364	-0.267118	0.830978	0.228445	-1.16929	0.242288	0.417083
B0464.9	B0464.9	1414.5	1150.43	700.474	655.111	661.101	546.325	439.45	436.961	440.196	484.863	476.052	511.034	758.071	747.256	804.399	694.041	790.35	641.382	644.149	1017.89	684.193	360.655	365.011	373.974		658.244	-0.809206	0.570696	0.188223	-4.2992	1.71418e-05	6.83009e-05		658.244	0.160896	1.11798	0.192313	0.836637	0.402796	0.508997		658.244	-0.119381	0.920583	0.189445	-0.630162	0.528589	0.69325
B0478.1	jnk-1	508.955	465.42	578.156	765.745	720.211	774.426	990.026	1040.96	979.791	472.866	516.94	485.433	587.683	635.694	636.687	793.896	702.43	813.615	466.189	345.766	368.057	266.932	262.902	250.515		601.221	0.540969	1.45495	0.105437	5.13073	2.88623e-07	1.79521e-06		601.221	-1.02905	0.490034	0.106336	-9.67732	3.76447e-22	6.43267e-21		601.221	0.311875	1.24132	0.106145	2.93819	0.00330131	0.0195399
B0478.3	B0478.3	60.4325	53.3658	49.7426	67.9609	54.4436	81.3506	15.1535	18.334	19.2712	10.9969	12.6558	3.93861	34.6896	43.1514	32.0932	34.6032	49.9753	32.7559	14.1931	18.1982	12.6916	11.8637	14.084	16.7809		31.7803	0.31916	1.2476	0.231685	1.37756	0.16834	0.233984		31.7803	-0.93443	0.523249	0.385751	-2.42237	0.0154197	0.0321223		31.7803	0.101973	1.07324	0.267428	0.381309	0.702974	0.823562
B0491.2	sqt-1	0	1.7497	0	0	0.777766	0	13.133	15.2783	16.2284	6.99802	4.86761	1.9693	70.3996	49.4663	60.0452	57.3424	50.9007	62.3419	22.9273	20.6247	23.0757	172.023	180.745	152.227		40.9634	-1.04627	0.484218	1.56615	-0.668055	0.504099	0.586119		40.9634	-1.69298	0.309287	0.469583	-3.60529	0.000311803	0.000924444		40.9634	-0.0812626	0.94523	0.220518	-0.368507	0.712495	0.830087
B0491.4	lgc-20	234.176	205.589	251.975	335.853	384.216	390.802	298.018	317.79	285.012	175.95	247.274	209.731	91.8255	77.8831	107.667	96.8889	94.3977	81.3615	378.847	279.039	329.982	285.914	302.807	333.22		241.509	0.682776	1.60523	0.141719	4.81783	1.45131e-06	7.58168e-06		241.509	-0.508482	0.702962	0.146807	-3.46361	0.000532987	0.00152308		241.509	-0.0231729	0.984066	0.176848	-0.131033	0.895749	0.943851
B0491.5	nduf-11	4453.12	4374.24	3597.78	2974.47	3082.29	3366.48	2974.12	3003.72	3015.44	3256.08	3370.33	3089.84	2921.07	3121.64	3247.62	3334.76	3324.28	2883.58	4050.5	3987.84	3920.55	4437.01	4734.58	4509.26		3542.94	-0.398706	0.758539	0.0861707	-4.62693	3.71125e-06	1.74734e-05		3542.94	0.111562	1.0804	0.0868911	1.28393	0.199165	0.288372		3542.94	0.0389394	1.02736	0.0869029	0.448079	0.654096	0.786685
B0491.8	clh-2	51.9342	55.9903	85.6226	60.0585	55.2214	62.2093	19.1944	26.4825	21.2998	82.9765	73.0141	80.7415	80.6024	77.8831	66.2568	70.195	62.0064	84.5314	119.004	76.4325	96.9178	107.959	104.457	141.439		73.4345	-0.13266	0.912148	0.214041	-0.619791	0.535395	0.616152		73.4345	1.82167	3.5349	0.259587	7.01759	2.25732e-12	1.73775e-11		73.4345	-0.0565461	0.961563	0.215179	-0.262786	0.792715	0.884136
B0495.1	sre-1	5.66555	4.37424	4.89272	7.90243	5.44436	10.3682	7.07162	6.11134	4.0571	3.99887	6.81465	6.89256	1.02028	1.05247	4.14105	0.988662	5.55281	5.28321	6.55067	2.42643	8.07648	3.5591	7.04201	4.79454		5.17006	0.669067	1.59004	0.564978	1.18424	0.23632	0.311401		5.17006	0.0403327	1.02835	0.604685	0.0667003	0.94682	0.968391		5.17006	0.929797	1.90501	0.805046	1.15496	0.248106	NA
B0495.10	cpna-5	775.236	805.736	1006.27	1174.3	1172.87	1225.04	1087.01	1103.1	946.319	652.815	658.101	703.041	1266.17	1287.18	1170.88	1422.69	1295.66	1408.5	901.808	601.755	779.957	612.165	626.739	607.708		970.46	0.464512	1.37985	0.12117	3.83356	0.000126303	0.000409932		970.46	-0.639072	0.642126	0.123325	-5.18203	2.19483e-07	1.00861e-06		970.46	0.147932	1.10798	0.120811	1.22449	0.220766	0.391971
B0495.4	nhx-2	544.837	561.653	540.645	730.184	790.21	764.855	358.632	354.458	318.483	198.944	238.513	231.393	422.397	379.943	459.657	562.549	575.641	618.136	135.38	95.844	121.147	72.3683	76.2885	88.699		385.036	0.47248	1.38749	0.0996606	4.74089	2.12786e-06	1.07681e-05		385.036	-0.624595	0.648602	0.114973	-5.43253	5.55595e-08	2.77871e-07		385.036	0.47609	1.39097	0.104817	4.54209	5.56995e-06	0.00014352
B0495.5	B0495.5	710.082	616.768	526.783	580.038	539.77	507.245	868.798	932.998	891.549	1170.67	1147.78	1062.44	334.653	372.576	286.768	347.02	364.634	365.598	641.965	787.377	683.039	907.57	917.809	835.448		683.307	-0.18647	0.878753	0.114234	-1.63235	0.102606	0.152871		683.307	0.328003	1.25527	0.111557	2.94023	0.00327974	0.00799338		683.307	0.116277	1.08393	0.123027	0.945133	0.344591	0.524146
B0495.6	moa-2	3943.22	2754.02	1446.61	2134.45	1804.42	1938.86	515.218	476.684	588.28	404.885	425.429	375.152	985.594	967.223	854.092	1004.48	1453.91	1203.52	1790.52	1983.61	1908.36	1331.1	1199.49	1172.26		1360.89	-0.470157	0.721886	0.218216	-2.15455	0.0311967	0.0541719		1360.89	-0.390489	0.762871	0.223948	-1.74366	0.0812183	0.136479		1360.89	0.383758	1.30474	0.220103	1.74354	0.0812399	0.194933
B0495.7	B0495.7	3347.4	3876.46	3740.48	3110.4	2953.96	2743.59	1413.31	1375.05	1407.82	2843.2	2681.08	2753.09	2850.67	2950.08	3556.13	2581.4	2878.21	2449.3	2370.25	3145.87	2461.02	3516.39	3305.05	3410.12		2821.68	-0.316043	0.80327	0.108838	-2.90379	0.00368675	0.00828072		2821.68	0.980074	1.97257	0.110652	8.85731	8.19717e-19	1.10269e-17		2821.68	-0.242321	0.845384	0.10947	-2.21358	0.0268576	0.0882189
B0495.8	luc-7L	3734.54	2887	2278.38	1985.09	1783.42	1682.04	1187.02	986.981	1129.9	886.749	917.057	911.788	2017.1	1735.53	1871.76	1623.38	1836.13	1711.76	1051.38	1377	1486.07	1023.83	945.977	904.969		1581.45	-0.707059	0.612568	0.148278	-4.76847	1.85634e-06	9.49746e-06		1581.45	-0.282911	0.821931	0.151243	-1.87057	0.0614054	0.107617		1581.45	-0.121134	0.919464	0.149204	-0.811873	0.416865	0.595739
B0496.3	unc-82	1012.24	1484.62	2763.57	1887.1	2006.64	1893.39	2729.64	2941.59	2565.1	2430.31	2084.31	2553.2	3192.47	3435.27	3219.67	3242.81	2274.8	3234.38	2549.3	2009.08	2256.8	3315.89	2880.18	3442.48		2558.54	0.137196	1.09977	0.22547	0.608489	0.542863	0.622723		2558.54	-0.220746	0.858122	0.225283	-0.97986	0.327155	0.431899		2558.54	-0.170223	0.888705	0.225078	-0.756286	0.449478	0.625018
B0496.5	srtx-1	4.72129	3.4994	5.70817	7.11219	12.4443	9.57066	13.133	11.2041	13.1856	8.99745	13.6293	4.92326	8.16227	9.47226	11.3879	16.8073	8.32921	9.50979	8.73422	6.06607	6.9227	1.18637	4.69468	3.5959		8.45822	1.06002	2.08497	0.517729	2.04745	0.040614	0.0678786		8.45822	-0.444081	0.735052	0.46047	-0.964408	0.334842	0.440572		8.45822	0.254175	1.19265	0.463868	0.547946	0.583729	0.734569
B0496.6	B0496.6	0.944258	0.874849	2.44636	5.5317	5.44436	4.78533	3.03069	2.03711	3.04283	2.99915	0.973522	2.95396	5.10142	2.10495	3.10579	2.96599	1.85094	3.16993	7.64244	1.21321	5.76891	3.5591	8.21568	7.19181		3.6231	1.85538	3.61848	0.828069	2.24061	0.0250511	0.0447432		3.6231	-0.232419	0.851207	0.848909	-0.273785	0.78425	0.841515		3.6231	-0.385381	0.765577	0.794609	-0.484995	0.62768	NA
B0496.8	tes-1	634.542	636.89	618.929	968.048	908.431	870.93	726.356	677.34	681.593	536.848	565.616	549.436	1058.03	1036.69	992.817	1145.86	1179.97	1028.11	1238.08	977.851	1107.63	2410.7	2569.16	2355.32		1061.47	0.539634	1.4536	0.0887886	6.07774	1.2189e-09	1.49627e-08		1061.47	-0.336061	0.792201	0.0925982	-3.62924	0.000284253	0.000849401		1061.47	0.120084	1.0868	0.087362	1.37456	0.169267	0.327661
B0507.1	B0507.1	675.145	694.63	897.814	1036.8	1091.21	1123.75	921.33	1060.32	863.149	530.85	517.913	513.004	996.817	1063	1053.9	1080.61	1075.39	964.715	1333.06	1051.86	1141.09	995.361	1090.34	1056		951.169	0.518809	1.43277	0.113565	4.56838	4.91497e-06	2.23868e-05		951.169	-0.865145	0.548991	0.116805	-7.40673	1.29454e-13	1.11864e-12		951.169	0.00364183	1.00253	0.113754	0.032015	0.97446	0.990074
B0507.2	B0507.2	936.704	845.979	702.105	995.706	1024.32	1015.29	1688.1	1749.88	1616.76	2180.38	2040.5	2106.17	1492.67	1571.34	1435.91	1677.76	1624.2	1824.82	1786.15	2339.08	2081.42	2594.58	2460.01	2833.57		1692.64	0.289966	1.22261	0.107852	2.68855	0.00717621	0.01492		1692.64	0.32388	1.25169	0.105345	3.07448	0.00210868	0.00533641		1692.64	0.187915	1.13912	0.106003	1.77273	0.0762731	0.186514
B0511.1	fkb-7	2772.34	2128.51	1555.88	3476.28	3149.95	2820.95	1621.42	1692.84	1462.59	906.743	1049.46	1048.65	2489.49	2343.86	2088.13	2231.41	2370.12	2649	1032.82	911.124	1181.47	1516.18	1852.05	1392.81		1906	0.549502	1.46358	0.164305	3.3444	0.000824616	0.00220342		1906	-0.668714	0.629067	0.166326	-4.02051	5.80729e-05	0.000195128		1906	0.0669198	1.04748	0.164728	0.406245	0.684562	0.810956
B0511.11	B0511.11	82.1505	61.2394	43.219	75.8633	63.7768	74.1726	5.05115	4.07423	3.04283	3.99887	2.92056	4.92326	0	3.15742	3.10579	0	6.47828	1.05664	0	1.21321	1.15378	0	1.17367	1.19863		18.4571	0.20071	1.14926	0.305772	0.656404	0.511564	0.593408		18.4571	-0.0407493	0.97215	0.650289	-0.0626633	0.950035	0.969848		18.4571	0.336115	1.26235	0.827327	0.406266	0.684547	0.810956
B0511.12	B0511.12	2136.86	3040.1	4189.8	2185.02	2232.19	2052.11	4234.89	3861.35	4117.96	4321.78	3678.94	4253.7	5658.49	6148.55	6374.11	4493.47	3831.44	4336.46	2430.3	3298.73	3002.14	2733.39	2641.93	2779.63		3668.06	-0.534262	0.690512	0.164265	-3.25243	0.00114421	0.00293916		3668.06	0.0047277	1.00328	0.163935	0.0288389	0.976993	0.987536		3668.06	-0.522051	0.696381	0.163755	-3.188	0.0014326	0.0104153
B0511.5	cutl-14	496.68	428.676	424.036	395.121	395.105	468.962	204.067	211.86	280.954	184.948	199.572	163.452	221.402	214.705	180.136	238.268	273.013	207.102	391.948	247.496	301.137	111.518	167.835	128.254		272.344	-0.0993549	0.93345	0.169433	-0.586395	0.55761	0.636694		272.344	-0.346708	0.786376	0.181173	-1.91368	0.0556611	0.0989107		272.344	0.222796	1.16699	0.180036	1.23751	0.215898	0.386053
B0511.6	B0511.6	5859.12	5501.05	4031.6	4647.42	4423.93	4495.02	4526.84	4593.69	4376.6	8610.56	9769.29	8845.13	3713.83	4005.71	3863.6	4102.95	4311.76	3947.62	2797.13	3159.21	3174.06	9560.93	9732.06	10478.5		5521.98	-0.181873	0.881558	0.107314	-1.69477	0.0901197	0.136822		5521.98	1.01229	2.01711	0.107277	9.4362	3.86541e-21	6.12253e-20		5521.98	0.0940211	1.06734	0.10784	0.871858	0.383286	0.562253
B0511.7	B0511.7	4837.44	3260.56	1940.78	2301.98	2057.19	1935.67	911.228	804.66	896.62	713.798	661.021	704.026	2033.42	1986.02	2417.34	1507.71	2072.12	1499.38	959.673	1560.19	1203.4	704.702	813.353	667.639		1602.08	-0.673118	0.62715	0.22369	-3.00915	0.0026198	0.00617512		1602.08	-0.329679	0.795714	0.226693	-1.45429	0.145865	0.222447		1602.08	-0.341567	0.789184	0.224355	-1.52244	0.127899	0.267003
B0511.8	mrps-30	829.059	886.222	810.56	705.687	754.433	766.45	1673.95	1795.72	1710.07	1388.61	1411.61	1459.25	4667.8	4408.81	4340.86	3694.63	4464.46	3647.53	1519.75	1508.03	1503.38	1137.73	1269.91	1219.01		1982.23	-0.181817	0.881592	0.0862826	-2.10723	0.0350979	0.0599113		1982.23	-0.282171	0.822353	0.0829082	-3.40342	0.000665485	0.00186174		1982.23	-0.184177	0.880151	0.0794959	-2.31681	0.0205141	0.0734359
B0513.2	thoc-7	4503.17	2657.79	1614.6	2023.81	1700.2	1629.4	721.305	585.67	621.751	362.897	345.6	351.521	483.614	339.949	348.884	304.508	362.783	347.635	317.707	453.742	454.59	199.31	225.344	170.206		880.249	-0.712778	0.610144	0.240275	-2.96651	0.003012	0.00697362		880.249	-0.863595	0.549581	0.245454	-3.51836	0.000434229	0.00125792		880.249	-0.208222	0.865604	0.247156	-0.842469	0.399526	0.578503
B0513.4	B0513.4	20.7737	15.7473	5.70817	27.6585	20.2219	27.1169	0	0	0	5.9983	3.89409	7.87722	9.18255	8.41979	5.17631	16.8073	18.5094	15.8496	4.36711	10.9189	4.61513	32.0319	22.2997	22.7741		12.7478	0.847476	1.79935	0.384434	2.20448	0.0274907	0.0484375		12.7478	4.98706	31.7142	1.25908	3.96089	7.46722e-05	0.00024568		12.7478	1.16954	2.2494	0.46571	2.5113	0.0120287	0.0494995
B0513.5	prdh-1	80.262	100.608	173.692	90.0877	101.887	102.087	102.033	108.986	115.627	218.938	175.234	231.393	133.657	119.982	141.831	136.435	137.895	157.44	209.621	90.9911	146.53	809.102	724.154	921.75		222.093	-0.274701	0.826621	0.2432	-1.12953	0.258675	0.336061		222.093	0.937309	1.91495	0.241195	3.88611	0.000101863	0.000328726		222.093	0.125825	1.09113	0.24219	0.51953	0.603391	0.750073
B0513.9	vamp-8	18.8852	13.9976	12.2318	24.4975	21.7774	28.712	1.01023	3.05567	5.07138	44.9873	47.7026	41.3554	33.6694	18.9445	33.1284	54.3764	79.5902	69.7384	53.4971	31.5436	34.6135	536.238	604.439	552.571		98.568	0.74415	1.67499	0.293724	2.5335	0.0112929	0.0223129		98.568	3.87622	14.6845	0.519795	7.45721	8.83731e-14	7.82364e-13		98.568	1.24785	2.37488	0.242522	5.14532	2.67061e-07	1.0819e-05
B0523.5	fli-1	1452.27	1921.17	2334.64	1544.13	1501.09	1301.61	3515.6	3603.65	3363.34	3026.14	2929.33	2915.55	2345.63	2431.21	2126.43	1831	1736.18	2055.17	659.434	815.28	831.877	773.511	798.095	698.804		1937.96	-0.393586	0.761235	0.13531	-2.90878	0.00362848	0.00817474		1937.96	-0.240828	0.846259	0.134327	-1.79284	0.0729979	0.124625		1937.96	-0.296314	0.81433	0.135241	-2.19101	0.0284508	0.0918386
B0524.6	B0524.6	643.984	780.365	729.831	429.892	458.882	389.207	1337.55	1191.71	1340.87	755.786	722.353	736.52	508.101	582.018	541.442	482.467	436.821	482.886	1732.65	2388.82	1876.05	909.943	908.42	872.606		884.966	-0.75366	0.593097	0.117304	-6.42482	1.32025e-10	2.15853e-09		884.966	-0.805357	0.57222	0.114458	-7.03626	1.97466e-12	1.53345e-11		884.966	-0.219029	0.859144	0.120083	-1.82397	0.068156	0.172927
B0545.1	tpa-1	1430.55	1573.85	2338.72	2036.46	2187.86	2157.39	2556.89	2586.12	2260.82	2199.38	2223.52	2194.79	2491.53	2515.41	2311.74	2701.03	2442.31	2739.87	2368.07	1756.74	1846.05	2405.95	2464.7	2426.04		2258.99	0.255657	1.19388	0.141241	1.81008	0.0702838	0.110054		2258.99	-0.161941	0.893821	0.141228	-1.14667	0.251518	0.349274		2258.99	0.107107	1.07707	0.141089	0.759149	0.447764	0.623724
B0545.3	scl-23	1.88852	0	2.44636	0	3.11106	4.78533	18.1842	18.334	15.2141	40.9884	40.8879	35.4475	29.5882	29.4693	23.811	26.6939	30.5404	41.2091	5.45889	0	3.46135	26.1001	5.86834	14.3836		17.4113	0.851178	1.80397	0.834242	1.0203	0.307585	0.388477		17.4113	1.18133	2.26787	0.359753	3.28374	0.00102441	0.00276938		17.4113	0.24461	1.18477	0.343671	0.711755	0.476616	0.648329
B0546.1	mai-2	12489.7	9090.55	4333.32	10181.5	8170.43	9385.62	2097.24	1948.5	2367.32	2261.36	2435.75	2135.71	2066.07	1889.19	2123.32	2375.76	3140.11	2098.49	1976.12	2056.4	2066.42	1838.87	1969.42	1968.16		3852.72	0.0982205	1.07045	0.226902	0.432876	0.665105	0.727819		3852.72	0.0914718	1.06546	0.228001	0.401191	0.68828	0.763894		3852.72	0.325113	1.25276	0.227992	1.42599	0.153872	0.306484
B0546.2	otub-4	2549.5	2614.05	2411.3	1765.4	1615.42	1573.58	1397.15	1428.02	1474.76	2018.43	1882.79	1875.76	2239.52	2487	2866.64	2008.96	2148.01	1949.51	1581.99	2203.2	1936.05	2674.07	2482.31	2704.12		2078.65	-0.612426	0.654096	0.107656	-5.68874	1.27977e-08	1.1669e-07		2078.65	0.42598	1.34348	0.10892	3.91096	9.1931e-05	0.000298323		2078.65	-0.314149	0.804325	0.107883	-2.91195	0.00359179	0.0208364
B0546.3	B0546.3	236.065	258.08	363.692	334.273	337.55	299.083	217.2	244.454	237.341	375.894	336.838	343.644	324.45	417.832	407.894	511.138	419.237	515.642	557.898	633.298	546.893	857.743	873.21	811.476		435.868	0.17561	1.12944	0.143598	1.22293	0.221357	0.294574		435.868	0.595695	1.5112	0.147543	4.03743	5.4039e-05	0.000182544		435.868	0.32964	1.2567	0.141797	2.32473	0.0200865	0.0724028
B0546.4	B0546.4	1797.87	1204.67	1012.79	1724.31	1437.31	1493.02	175.78	245.472	200.827	374.894	365.071	363.337	777.456	756.729	752.636	1028.21	1063.36	1042.91	208.53	175.916	156.914	293.032	332.148	324.83		721.168	0.213887	1.15981	0.159756	1.33884	0.180624	0.248688		721.168	0.826776	1.77372	0.173113	4.77593	1.78877e-06	7.38782e-06		721.168	0.454899	1.37069	0.162217	2.80426	0.00504318	0.026597
B0547.1	csn-5	2467.35	1961.41	1257.43	1376.6	1306.65	1239.4	1277.94	1187.64	1314.5	1045.7	1008.57	1042.75	106.109	125.244	108.703	87.9909	101.801	48.6056	1771.96	2658.15	2627.16	1482.96	1634.92	1631.34		1202.95	-0.535273	0.690028	0.201701	-2.6538	0.00795909	0.0163874		1202.95	-0.287548	0.819293	0.20289	-1.41726	0.156407	0.235728		1202.95	-0.505671	0.704333	0.234275	-2.15845	0.030893	0.0978593
B0563.1	B0563.1	241.73	152.224	100.301	103.522	90.2209	82.1481	113.146	71.299	110.556	122.965	108.061	101.419	23.4665	25.2594	20.7053	38.5578	57.379	23.2461	38.2122	195.328	130.377	29.6592	28.1681	22.7741		84.6135	-0.839498	0.558838	0.374955	-2.23893	0.0251605	0.0448739		84.6135	0.172232	1.1268	0.37983	0.453446	0.650228	0.732266		84.6135	0.785409	1.72358	0.423339	1.85527	0.0635572	0.164815
B0563.10	B0563.10	0	0	0	2.37073	0.777766	1.59511	9.09208	3.05567	8.11421	5.9983	9.73522	7.87722	2.04057	2.10495	0	2.96599	2.7764	3.16993	3.27533	3.63964	2.30757	136.432	105.63	180.994		20.5814	3.29011	9.78188	1.34345	2.44901	0.0143251	0.027458		20.5814	0.221498	1.16594	0.511222	0.433271	0.664818	0.743839		20.5814	1.10129	2.14547	0.906677	1.21465	0.224501	0.395349
B0563.2	tsp-11	367.316	339.441	456.654	509.707	590.324	540.742	596.036	637.616	571.037	313.911	329.05	344.628	1316.17	1222.97	1196.76	1448.39	1415.04	1487.75	497.851	390.655	477.666	240.832	239.428	267.296		658.22	0.494271	1.40861	0.112838	4.38034	1.18494e-05	4.92171e-05		658.22	-0.869643	0.547282	0.115811	-7.50916	5.95101e-14	5.34956e-13		658.22	0.219759	1.16454	0.105903	2.07511	0.0379765	0.114432
B0563.4	tmbi-4	1409.78	1213.42	980.175	1442.98	1480.87	1399.71	1538.58	1752.94	1473.74	2218.37	2376.37	2225.31	433.62	466.246	398.576	527.946	529.368	750.216	1527.4	1585.67	1589.91	2233.93	2298.04	2460.8		1429.75	0.263629	1.20049	0.130821	2.01519	0.0438846	0.0728167		1429.75	0.517257	1.43123	0.130273	3.97055	7.17055e-05	0.00023674		1429.75	0.475886	1.39077	0.137945	3.44981	0.000560976	0.00499468
B0563.5	B0563.5	10.3868	5.24909	0.815453	9.48291	5.44436	7.97555	28.2865	32.5938	25.3569	41.9881	62.3054	51.2019	43.8722	35.7841	46.5868	72.1724	68.4846	70.7951	14.1931	10.9189	18.4605	24.9137	29.3417	33.5618		31.2572	0.530628	1.44456	0.466386	1.13775	0.255227	0.332335		31.2572	0.851826	1.80478	0.261447	3.25813	0.00112151	0.00299714		31.2572	0.742942	1.67358	0.239775	3.09849	0.00194508	0.0130724
B0563.6	B0563.6	60.4325	65.6137	113.348	90.8779	80.8877	97.3017	57.5832	52.9649	48.6852	118.966	119.743	114.22	73.4604	73.6732	85.9268	86.0136	109.205	66.5685	171.409	122.535	129.224	201.682	192.482	225.343		106.589	0.160631	1.11778	0.210329	0.763713	0.445038	0.528013		106.589	1.14816	2.21631	0.222764	5.15416	2.54773e-07	1.16164e-06		106.589	0.172947	1.12736	0.218265	0.79237	0.428145	0.60622
B0563.8	B0563.8	382.425	210.839	125.58	151.727	126.776	138.775	0	0	2.02855	1.99943	1.94704	1.9693	57.1359	68.4108	56.9395	71.1837	67.5592	35.9259	0	4.85286	0	0	2.34734	1.19863		62.9007	-0.782956	0.581175	0.334075	-2.34365	0.0190961	0.0353461		62.9007	1.54388	2.91579	1.22176	1.26365	0.206354	0.297079		62.9007	-0.0597114	0.959456	0.358767	-0.166435	0.867815	0.927727
B0563.9	B0563.9	0.944258	0.874849	0.815453	0.790243	0	0.797555	2.02046	2.03711	3.04283	3.99887	4.86761	6.89256	0	0	0	0	0	0	2.18356	3.63964	3.46135	78.3002	91.5462	118.665		13.5366	-0.735237	0.600719	1.34516	-0.546577	0.584669	0.662204		13.5366	1.15124	2.22105	0.709016	1.62371	0.104437	0.168292		13.5366	0	1	1.68831	0	1	1
B0564.10	unc-30	415.474	430.426	480.302	442.536	428.549	445.035	839.502	777.159	892.563	691.804	797.314	691.226	401.992	422.042	382.012	443.909	496.976	405.751	696.554	1068.84	827.262	373.705	393.179	415.926		569.168	-0.011851	0.991819	0.131453	-0.0901539	0.928165	0.945964		569.168	-0.2026	0.868983	0.128213	-1.58019	0.114064	0.181278		569.168	0.160269	1.1175	0.134062	1.19549	0.231897	0.403964
BE0003N10.1	BE0003N10.1	270.058	333.317	382.448	232.331	249.663	236.076	237.404	266.862	231.255	232.934	222.936	218.593	391.789	424.147	419.281	380.635	372.964	352.919	607.028	719.436	743.036	309.642	308.675	330.823		353.094	-0.460252	0.726859	0.120538	-3.81832	0.000134365	0.000434017		353.094	-0.125056	0.916969	0.127707	-0.979239	0.327462	0.432229		353.094	-0.158132	0.896185	0.118331	-1.33635	0.181434	0.343793
BE0003N10.3	BE0003N10.3	593.938	673.634	777.127	820.272	859.431	850.991	1132.47	1246.71	1053.83	709.799	653.233	738.489	776.436	849.346	797.152	753.361	694.101	691.044	2298.19	1977.54	2132.19	1536.34	1677.17	1547.44		1076.68	0.306026	1.2363	0.100402	3.048	0.0023037	0.00550505		1076.68	-0.708103	0.612124	0.100654	-7.03502	1.99238e-12	1.54284e-11		1076.68	-0.180001	0.882702	0.101946	-1.76565	0.0774539	0.188768
BE10.2	agmo-1	926.317	1022.7	1380.56	1471.43	1621.64	1695.6	1325.42	1422.92	1191.77	916.741	954.051	825.138	947.843	1009.32	961.759	1199.25	1135.55	1005.92	1299.22	874.728	924.18	322.692	298.112	308.049		1043.37	0.523575	1.43751	0.147869	3.54082	0.000398892	0.00115058		1043.37	-0.547437	0.684235	0.149234	-3.66831	0.000244158	0.000738608		1043.37	0.194964	1.1447	0.14943	1.30472	0.191988	0.357228
BE10.4	BE10.4	63.2653	39.3682	43.219	39.5121	32.6662	35.89	76.7775	47.8722	61.8708	193.945	176.207	198.9	52.0345	46.3088	45.5516	45.4785	47.1989	80.3049	32.7533	27.9039	28.8446	42.7092	45.7731	51.5413		64.829	-0.426096	0.744273	0.239567	-1.77861	0.0753034	0.116997		64.829	1.60872	3.04981	0.211079	7.62142	2.509e-14	2.33282e-13		64.829	0.256954	1.19495	0.237863	1.08026	0.280027	0.458351
C01A2.2	C01A2.2	805.452	551.155	362.061	1390.04	1082.65	1207.5	255.588	244.454	292.111	162.954	153.816	146.713	440.762	408.36	337.496	499.274	518.262	438.507	418.151	253.562	294.215	138.805	170.182	135.446		446.146	1.09975	2.14318	0.212074	5.1857	2.15203e-07	1.3877e-06		446.146	-0.773344	0.58506	0.224851	-3.43936	0.000583084	0.00165316		446.146	0.295478	1.22729	0.216095	1.36735	0.171515	0.330616
C01A2.5	tads-1	5780.75	3970.06	2187.05	3349.84	3038.73	2726.04	1242.58	1192.73	1247.56	1394.61	1347.35	1334.2	3076.15	2778.53	2827.3	2707.95	2986.49	2615.19	1565.61	2121.91	1836.82	1985.98	2137.25	1844.7		2387.31	-0.389058	0.763628	0.206628	-1.88289	0.059715	0.09549		2387.31	0.146372	1.10678	0.208419	0.702296	0.482495	0.586179		2387.31	-0.0632022	0.957137	0.207022	-0.305291	0.760144	0.862183
C01A2.7	nlp-38	212.458	175.845	119.056	241.814	230.219	261.598	29.2967	22.4082	28.3997	55.9842	81.7758	64.987	234.665	207.337	250.534	386.567	321.137	563.191	300.239	220.805	220.373	590.81	531.672	644.865		249.835	0.535029	1.44897	0.210703	2.53926	0.0111088	0.0219724		249.835	1.34025	2.53196	0.273891	4.89338	9.91179e-07	4.20351e-06		249.835	0.874334	1.83316	0.208054	4.20244	2.64059e-05	0.000480179
C01B10.11	C01B10.11	3702.44	3284.18	3443.66	6310.88	6566.68	6534.37	6198.78	6453.57	5660.67	3893.9	4459.7	3735.77	5166.72	5559.17	5285.02	6252.3	5435.27	4472.77	3658.55	2943.26	3086.37	3860.44	4044.46	3605.49		4733.93	0.896242	1.86121	0.113029	7.92932	2.20344e-15	1.43784e-13		4733.93	-0.599108	0.660162	0.11314	-5.29526	1.18849e-07	5.66756e-07		4733.93	0.0135325	1.00942	0.11304	0.119715	0.904709	0.949228
C01B10.3	C01B10.3	39.6588	23.6209	42.4036	33.9804	33.4439	39.0802	76.7775	47.8722	53.7566	164.953	140.187	143.759	117.333	96.8276	97.3147	113.696	124.938	132.08	68.782	55.8079	65.7656	170.837	181.919	186.987		93.8242	0.00900431	1.00626	0.223923	0.0402115	0.967924	0.976324		93.8242	1.3303	2.51455	0.184102	7.22588	4.9788e-13	4.10589e-12		93.8242	0.249829	1.18907	0.173111	1.44317	0.148973	0.299099
C01B10.6	C01B10.6	684.587	674.508	1040.52	1008.35	1088.09	1135.72	814.246	864.755	811.421	720.796	704.83	742.428	2304.82	2505.94	2694.79	3699.57	2739.39	3676.06	1600.55	1129.5	1141.09	1382.12	1362.63	1543.84		1502.94	0.428804	1.34612	0.16115	2.6609	0.00779319	0.0160903		1502.94	-0.19999	0.870557	0.162772	-1.22865	0.219202	0.311848		1502.94	0.430341	1.34755	0.158718	2.71135	0.006701	0.0327445
C01B10.8	C01B10.8	874.383	955.335	795.882	481.258	486.882	450.618	732.417	722.157	866.192	1100.69	1060.17	1119.55	425.458	437.829	421.352	461.705	387.771	388.845	776.254	1125.86	739.575	386.755	386.137	373.974		664.877	-0.887725	0.540466	0.132532	-6.69819	2.11013e-11	4.51071e-10		664.877	0.499253	1.41348	0.131329	3.80155	0.000143793	0.000453243		664.877	-0.0529366	0.963972	0.138036	-0.383498	0.701351	0.822756
C01B10.9	C01B10.9	851.721	845.979	682.534	673.287	552.214	525.589	962.75	844.383	945.305	776.78	739.876	801.507	744.807	710.42	838.563	547.719	603.405	543.114	906.175	1329.68	1002.64	532.678	543.409	606.509		754.627	-0.442237	0.735993	0.136628	-3.2368	0.0012088	0.00308157		754.627	-0.247775	0.842194	0.136434	-1.81608	0.0693582	0.119326		754.627	-0.436712	0.738817	0.138267	-3.15847	0.001586	0.0111237
C01B7.1	sup-37	2638.26	3840.59	5538.56	4042.09	4351.6	4127.35	5245.12	5638.73	5247.86	3404.04	3003.31	3353.72	3765.87	3860.47	3414.3	3286.31	2538.56	3155.14	3590.86	3921.11	3877.86	3153.36	3275.71	3267.48		3814.09	0.0589602	1.04171	0.168404	0.350113	0.726254	0.782498		3814.09	-0.724798	0.605082	0.168576	-4.29954	1.71153e-05	6.18352e-05		3814.09	-0.298135	0.813303	0.168824	-1.76596	0.0774032	0.188707
C01C10.2	C01C10.2	145.416	149.599	114.979	313.726	258.996	290.31	184.872	214.915	166.341	208.941	232.672	247.148	120.393	105.247	137.69	169.061	209.156	190.196	126.646	90.9911	111.917	232.528	237.081	270.891		188.738	1.07644	2.10882	0.148694	7.23928	4.51061e-13	1.6368e-11		188.738	0.283175	1.21687	0.149852	1.8897	0.0587981	0.103715		188.738	0.646213	1.56506	0.15906	4.06271	4.85055e-05	0.000757393
C01C10.3	acl-12	508.011	480.292	451.761	595.053	640.879	563.871	2055.82	2217.4	2040.72	2256.36	2294.59	2139.65	1349.83	1371.37	1166.74	1095.44	1143.88	845.314	979.325	1055.5	1292.24	2223.25	2275.74	2379.29		1392.6	0.322511	1.25051	0.120603	2.67416	0.00749174	0.0155197		1392.6	0.0836061	1.05966	0.114041	0.733126	0.463482	0.567717		1392.6	-0.33299	0.793889	0.11656	-2.8568	0.00427933	0.0235509
C01C10.4	clc-5	910.265	699.004	612.405	1411.37	1235.09	1243.39	1310.27	1380.14	1203.95	790.776	879.09	834.985	1630.41	1691.33	1561.18	1837.92	2157.27	2177.74	1628.93	1467.99	1611.83	1146.03	1160.76	1324.49		1329.44	0.809608	1.75274	0.121737	6.65044	2.92211e-11	5.85553e-10		1329.44	-0.63658	0.643236	0.122214	-5.20875	1.90113e-07	8.81653e-07		1329.44	0.338211	1.26419	0.119793	2.82331	0.00475311	0.0255038
C01C4.1	nlp-1	42.4916	37.6185	30.9872	76.6536	55.2214	70.9824	17.1739	14.2598	12.1713	100.971	101.246	68.9256	81.6227	58.9385	72.4684	96.8889	156.404	137.364	29.478	14.5586	23.0757	163.719	180.745	212.158		77.3385	0.873471	1.83207	0.243087	3.59324	0.000326593	0.000964705		77.3385	2.63614	6.21667	0.300815	8.76332	1.89579e-18	2.49279e-17		77.3385	0.875011	1.83402	0.223378	3.91718	8.9591e-05	0.00123965
C01C4.2	C01C4.2	3.77703	1.7497	4.89272	1.58049	6.22213	3.98777	7.07162	7.1299	2.02855	12.9963	12.6558	14.7698	11.2231	18.9445	19.67	20.7619	13.882	19.0196	4.36711	4.85286	3.46135	3.5591	1.17367	3.5959		8.47387	0.172921	1.12734	0.631471	0.273838	0.784209	0.830188		8.47387	1.31647	2.49055	0.516608	2.54829	0.0108254	0.0235066		8.47387	0.104092	1.07482	0.409654	0.254097	0.799421	0.887966
C01C4.3	C01C4.3	80.262	105.857	141.073	120.907	146.998	119.633	232.353	275.01	232.269	502.858	493.575	561.252	129.576	137.874	158.395	167.084	153.628	189.139	276.22	201.394	193.836	650.129	586.834	679.626		272.324	0.237996	1.17935	0.177899	1.33781	0.180957	0.249055		272.324	1.07459	2.10612	0.161345	6.6602	2.73455e-11	1.8947e-10		272.324	0.258064	1.19587	0.175978	1.46646	0.142524	0.289319
C01C7.1	ark-1	1693.06	2190.62	3369.45	2467.93	2621.07	2562.54	4155.08	4140.43	4210.26	2564.27	2350.08	2666.44	192.834	231.544	218.44	188.835	154.553	140.533	4921.73	4925.65	4795.12	3670.62	3323.83	3730.15		2561.88	0.0767	1.0546	0.164443	0.466424	0.640912	0.708885		2561.88	-0.722183	0.606179	0.164361	-4.39389	1.11342e-05	4.12275e-05		2561.88	-0.40867	0.753317	0.184889	-2.21035	0.0270808	0.0886722
C01F1.3	rml-4	1721.38	1901.92	1675.76	2578.56	2480.3	2580.89	2401.32	2894.74	2343.99	1574.55	1579.05	1540	3445.5	3354.23	2943.25	2701.03	3164.18	3204.8	1071.03	1112.52	1250.7	1174.5	1225.31	1195.04		2129.77	0.527827	1.44176	0.0975477	5.41096	6.26871e-08	4.68673e-07		2129.77	-0.702863	0.614352	0.0983333	-7.14777	8.82019e-13	7.0664e-12		2129.77	-0.103295	0.930904	0.0969763	-1.06516	0.286805	0.465466
C01F1.6	C01F1.6	1333.29	1433	1267.21	1047.86	954.319	986.575	1557.78	1428.02	1646.17	1816.49	1751.37	1816.68	2027.3	1873.4	2268.26	1777.61	1857.41	1605.04	1584.17	2309.96	1944.12	2153.25	2148.99	2071.24		1694.15	-0.432405	0.741026	0.114576	-3.77394	0.00016069	0.000506729		1694.15	0.217173	1.16245	0.113853	1.90749	0.0564573	0.100173		1694.15	-0.235195	0.84957	0.113438	-2.07333	0.0381418	0.114788
C01F4.2	rga-6	127.475	137.351	250.344	165.161	174.22	181.842	315.192	260.75	293.126	608.828	621.107	564.206	263.233	253.646	246.393	284.735	240.622	272.614	121.187	58.2343	98.0715	198.123	178.398	208.562		255.142	0.0126829	1.00883	0.204607	0.0619869	0.950573	0.963972		255.142	1.04571	2.06438	0.196856	5.31205	1.084e-07	5.19867e-07		255.142	0.0636187	1.04508	0.201463	0.315784	0.752166	0.857267
C01F6.2	C01F6.2	82.1505	79.6112	51.3736	44.2536	40.4438	33.4973	6.06138	6.11134	2.02855	20.9941	35.0468	25.6009	697.874	733.574	975.218	539.81	633.02	512.472	63.3231	84.925	69.227	93.7229	71.5938	79.1099		207.543	-0.844565	0.556879	0.226911	-3.72201	0.000197642	0.000613886		207.543	2.52538	5.75727	0.450308	5.60813	2.04526e-08	1.07535e-07		207.543	-0.513488	0.700527	0.176432	-2.91041	0.0036096	0.0208912
C01F6.4	fem-3	982.029	893.221	710.26	432.263	404.438	355.709	543.504	518.445	503.081	506.857	518.887	445.063	351.998	344.159	386.153	275.837	369.262	341.296	644.149	1116.16	616.12	380.824	399.047	364.385		516.798	-1.11602	0.461365	0.179094	-6.23148	4.62057e-10	6.54713e-09		516.798	-0.0895854	0.939793	0.18093	-0.49514	0.620502	0.708571		516.798	-0.133587	0.911562	0.184586	-0.723714	0.469242	0.641731
C01F6.9	znf-706	9329.27	6816.82	3952.5	5818.56	4919.37	6088.53	3599.45	3409.11	3847.15	3247.08	2910.83	3319.26	2906.79	2836.42	2782.79	2521.09	2753.27	2484.17	3994.81	5563.8	4588.59	5071.72	4689.98	5066.63		4271.58	-0.256231	0.837272	0.19258	-1.33052	0.183346	0.251645		4271.58	-0.195934	0.873007	0.193156	-1.01438	0.310401	0.414177		4271.58	-0.136041	0.910013	0.193435	-0.703292	0.481874	0.652399
C01G10.10	C01G10.10	520.286	466.294	332.705	290.809	254.329	266.383	123.248	138.524	105.485	132.962	140.187	142.775	151.002	135.769	125.267	87.0023	138.82	79.2482	92.8011	120.108	89.9951	253.882	259.381	230.138		194.892	-0.699744	0.615681	0.176097	-3.97364	7.07824e-05	0.000244566		194.892	0.179701	1.13265	0.195662	0.918426	0.358396	0.464971		194.892	-0.427772	0.743409	0.198884	-2.15086	0.0314871	0.0992239
C01G10.11	unc-76	3027.29	3038.35	3278.94	2746.09	2967.96	2811.38	2805.41	2985.39	2745.65	2823.2	2735.6	2567.97	2478.27	2500.68	2399.74	2537.9	2100.81	2552.85	4064.69	3655.42	3582.5	2605.26	2617.28	2722.1		2847.95	-0.132503	0.912248	0.080403	-1.64798	0.0993565	0.148536		2847.95	-0.0709637	0.952002	0.0810953	-0.875066	0.381538	0.488975		2847.95	-0.0375654	0.974298	0.0815811	-0.460467	0.645181	0.779197
C01G10.12	dnj-3	284.222	212.588	97.8544	196.77	176.553	173.867	165.678	154.821	170.398	217.938	200.545	184.13	204.057	167.343	181.171	183.891	234.143	238.801	113.545	160.144	136.146	74.7411	85.6778	68.3222		170.14	-0.116385	0.922496	0.235833	-0.493506	0.621655	0.69416		170.14	0.295717	1.2275	0.239257	1.23598	0.216465	0.308532		170.14	0.249079	1.18845	0.237857	1.04718	0.295018	0.473634
C01G10.16	txt-12	10.3868	5.24909	3.26181	11.0634	18.6664	15.9511	10.1023	6.11134	7.09993	9.99717	18.4969	7.87722	59.1764	42.0989	48.6574	64.2631	65.7082	67.6251	3.27533	1.21321	3.46135	32.0319	14.084	37.1577		23.459	1.30496	2.47077	0.442856	2.94669	0.0032119	0.00736676		23.459	0.643561	1.56218	0.456621	1.4094	0.158717	0.238594		23.459	0.397196	1.31695	0.29407	1.35069	0.176796	0.337934
C01G10.7	C01G10.7	502.345	384.059	193.262	253.668	227.108	215.34	308.12	252.602	356.011	219.938	221.963	223.516	374.444	364.156	401.682	333.179	393.324	356.089	233.64	298.451	226.141	181.514	206.566	219.35		289.436	-0.631008	0.645725	0.21879	-2.88408	0.00392556	0.00871448		289.436	-0.462271	0.725843	0.221818	-2.08401	0.037159	0.0695598		289.436	-0.074663	0.949564	0.218198	-0.34218	0.732215	0.844561
C01G10.8	ahsa-1	8615.41	6347.9	3386.58	4561.28	3975.94	4211.09	1299.16	1176.43	1370.29	1095.69	1317.17	1174.69	2688.45	2536.46	2798.32	2060.37	2614.45	1671.61	1980.48	2317.24	2144.88	1961.06	2276.92	2345.73		2746.98	-0.525337	0.694797	0.213342	-2.46241	0.0138006	0.0266103		2746.98	-0.100288	0.932847	0.215424	-0.465536	0.641548	0.725186		2746.98	-0.338042	0.791114	0.214196	-1.57819	0.114522	0.248206
C01G10.9	C01G10.9	1071.73	835.481	542.276	651.16	632.324	643.627	559.668	513.353	528.438	466.868	526.675	474.602	372.403	355.736	287.803	253.098	246.174	269.444	259.843	331.208	379.595	218.291	244.123	180.994		451.872	-0.345002	0.787307	0.18069	-1.90936	0.0562152	0.090575		451.872	-0.125343	0.916786	0.183757	-0.682114	0.495167	0.597333		451.872	-0.402759	0.75641	0.189351	-2.12705	0.0334156	0.103669
C01G12.1	madf-5	915.931	880.098	1126.96	1257.28	1266.98	1398.11	697.059	789.381	616.68	404.885	366.044	371.214	1003.96	1196.66	1206.08	1048.97	881.046	946.752	467.281	322.715	413.054	242.019	264.076	182.192		761.059	0.423814	1.34147	0.143031	2.96309	0.00304564	0.00704275		761.059	-0.880868	0.543041	0.149048	-5.90998	3.42145e-09	1.95618e-08		761.059	-0.243995	0.844404	0.144097	-1.69327	0.0904034	0.210412
C01G12.16	C01G12.16	15.1081	10.4982	3.26181	8.69267	6.22213	11.1658	0	0	0	0	0.973522	0	6.1217	13.6822	9.31737	14.8299	22.2112	9.50979	1.09178	0	0	2.37273	2.34734	4.79454		5.92503	-0.130614	0.913442	0.56741	-0.230194	0.817941	0.857478		5.92503	0.920797	1.89316	1.7234	0.534292	0.593139	0.684017		5.92503	0.687342	1.61031	0.559591	1.22829	0.219337	NA
C01G12.3	C01G12.3	671.368	536.282	242.19	250.507	212.33	184.235	17.1739	21.3897	18.257	19.9943	40.8879	37.4168	8.16227	3.15742	7.24684	4.94331	1.85094	1.05664	0	0	0	0	0	1.19863		94.9853	-1.16307	0.446562	0.31477	-3.69497	0.000219912	0.000675166		94.9853	0.792235	1.73176	0.391537	2.0234	0.0430322	0.0789374		94.9853	-1.23841	0.423838	0.686695	-1.80344	0.0713189	0.178078
C01G12.7	C01G12.7	30.2163	7.87364	17.1245	37.1414	32.6662	34.2948	78.798	63.1505	77.085	178.949	157.71	156.56	103.049	129.454	109.738	138.413	99.9505	114.117	152.849	105.55	111.917	237.273	218.302	305.652		112.41	0.932376	1.90842	0.282385	3.30179	0.000960706	0.00252088		112.41	1.17073	2.25125	0.210579	5.55956	2.70456e-08	1.39874e-07		112.41	0.0420079	1.02955	0.206625	0.203305	0.838897	0.909897
C01G12.8	catp-4	1.88852	0.874849	9.78544	3.16097	6.22213	2.39266	1.01023	0	2.02855	0	0.973522	1.9693	52.0345	51.5712	56.9395	60.3084	40.7206	34.8692	1.09178	2.42643	2.30757	3.5591	0	0		14.0056	-0.133664	0.911513	0.625484	-0.213698	0.830783	0.867639		14.0056	-0.0414762	0.97166	1.22454	-0.0338708	0.97298	0.98488		14.0056	-0.239542	0.847014	0.374412	-0.639783	0.522314	0.688487
C01G6.1	aqp-2	29094.5	31680	36609	39075.1	42320.6	44892	103057	119143	103806	66798.1	64527	69298.8	98238	119762	103311	119609	98687.3	109648	164073	157206	170614	125763	121425	125241		94328.3	0.374935	1.29678	0.101567	3.69151	0.00022293	0.00068316		94328.3	-0.700402	0.615401	0.101493	-6.90101	5.16346e-12	3.83694e-11		94328.3	0.0294795	1.02064	0.101474	0.290511	0.771425	0.869702
C01G6.3	C01G6.3	24775.4	20825.8	14686.3	11425.3	10724.6	9405.56	21165.3	21676.9	22031.1	25840.7	26367.8	24880.2	23770.6	22627.1	21208.4	18326.8	19681.9	19786.7	6243.88	13802.7	12767.8	17776.5	18117.9	17471.3		18557.8	-0.93394	0.523427	0.200245	-4.66399	3.1014e-06	1.49911e-05		18557.8	0.248893	1.1883	0.200187	1.2433	0.213756	0.305245		18557.8	-0.226198	0.854885	0.200208	-1.12982	0.258554	0.435321
C01G6.4	C01G6.4	2339.87	1845.06	1639.06	1736.16	1502.64	1508.97	2733.68	2736.86	2868.37	3958.88	3977.81	3915.96	1947.72	1755.53	1640.89	1599.66	1946.26	1805.8	1254.45	1505.6	1348.77	2422.56	2183.02	2521.93		2195.65	-0.294198	0.815525	0.119734	-2.45711	0.0140061	0.0269437		2195.65	0.507278	1.42137	0.118755	4.27162	1.9406e-05	6.96796e-05		2195.65	0.0021297	1.00148	0.120271	0.0177076	0.985872	0.995566
C01G6.5	C01G6.5	3699.6	4788.05	7155.6	3300.05	3351.39	3139.97	5103.69	4418.5	5291.48	4641.69	3824.97	4809.04	4576.99	4821.38	5945.51	3932.9	3170.65	4267.78	5207.78	7194.36	5914.29	3966.02	4200.56	4216.8		4622.46	-0.676108	0.625851	0.183314	-3.68825	0.000225798	0.00069124		4622.46	-0.158154	0.896171	0.183348	-0.862587	0.388365	0.494715		4622.46	-0.432359	0.741049	0.183416	-2.35726	0.0184101	0.0681455
C01G6.6	mtrr-1	1221.87	1188.04	1036.44	828.175	765.322	807.125	2139.67	2132.86	1946.4	911.742	866.434	911.788	1177.41	1197.72	1267.16	832.454	859.76	791.425	3165.06	2363.34	4150.16	3657.57	3699.4	4159.26		1753.19	-0.521383	0.696704	0.139887	-3.72717	0.000193645	0.000601975		1753.19	-1.2091	0.432538	0.139488	-8.66816	4.3916e-18	5.63774e-17		1753.19	-0.552163	0.681997	0.140627	-3.92644	8.6214e-05	0.00121078
C01G6.7	acs-7	588.273	587.024	499.057	586.36	647.101	564.669	146.483	135.468	136.927	74.9788	74.9612	66.9563	293.842	321.004	278.486	257.052	295.224	254.651	355.92	265.694	252.678	139.991	187.787	167.809		299.1	0.103727	1.07455	0.12728	0.814951	0.4151	0.499019		299.1	-0.949631	0.517765	0.169401	-5.60581	2.07285e-08	1.08836e-07		299.1	-0.145314	0.904183	0.138419	-1.04981	0.293805	0.47242
C01G6.8	cam-1	5455.92	6808.95	8207.54	6035.88	5964.69	5979.27	8292.98	8595.6	8475.29	6573.14	6160.44	6513.47	13884	14912.5	13747.3	11968.7	10758.6	12050	12864.4	14638.7	15130.7	11494.7	11688.6	11822.1		9917.64	-0.187519	0.878114	0.108063	-1.73528	0.0826906	0.127173		9917.64	-0.398144	0.758834	0.108106	-3.68291	0.000230587	0.000700627		9917.64	-0.290834	0.817429	0.107735	-2.69952	0.0069439	0.0334514
C01G6.9	C01G6.9	851.721	638.64	537.384	1537.81	1437.31	1465.91	719.284	814.845	698.836	195.945	205.413	180.191	495.858	454.669	420.317	670.313	536.771	691.044	1126.71	763.112	800.725	121.009	170.182	116.268		652.095	1.13203	2.19167	0.169655	6.67254	2.51411e-11	5.27765e-10		652.095	-1.94092	0.26045	0.178845	-10.8525	1.93981e-27	4.58483e-26		652.095	0.468886	1.38404	0.173696	2.69945	0.00694534	0.0334514
C01G8.2	cln-3.2	478.739	466.294	353.091	388.799	400.549	356.507	242.455	301.493	282.983	466.868	462.423	462.786	874.383	905.127	1001.1	843.329	1006.91	837.918	204.162	266.907	246.91	285.914	276.986	232.535		485.215	-0.178253	0.883772	0.131599	-1.35452	0.175571	0.242674		485.215	0.751499	1.68354	0.136032	5.52442	3.30569e-08	1.69347e-07		485.215	-0.0481947	0.967146	0.126566	-0.380787	0.703361	0.823789
C01G8.5	erm-1	5444.59	6107.32	7106.67	6253.98	6710.57	6485.71	8436.44	8865.52	8035.09	5547.43	5362.16	5358.48	5630.94	6390.62	6802.71	5928.02	5334.4	5895.01	7525.62	7836.16	7094.61	6020.81	6142.98	5969.2		6511.88	0.0597389	1.04228	0.0920941	0.648672	0.51655	0.598073		6511.88	-0.639211	0.642064	0.0922414	-6.92976	4.21555e-12	3.15418e-11		6511.88	-0.133825	0.911412	0.0923779	-1.44867	0.147431	0.296815
C01G8.6	hpo-32	209.625	180.219	147.597	89.2974	107.332	84.5408	313.172	220.008	368.182	316.91	384.541	381.06	518.304	588.333	808.54	436	518.262	452.243	607.028	1043.36	699.192	130.5	149.056	130.651		370.165	-0.932573	0.523923	0.223492	-4.17273	3.00977e-05	0.000113365		370.165	0.264246	1.20101	0.212009	1.24639	0.212621	0.30391		370.165	-0.445031	0.734569	0.208088	-2.13866	0.032463	0.101292
C01G8.9	let-526	6855.32	11182.3	20280.3	8871.27	10014.5	8827.33	22589.8	22786.1	21984.4	21616.9	18488.1	20449.3	18545.7	19230.8	15616.9	14154.7	10053.4	16968.6	7704.68	9379.36	10320.6	7606.98	7630.02	8022.46		14132.5	-0.467509	0.723212	0.242699	-1.92629	0.054068	0.0874218		14132.5	-0.153672	0.89896	0.242613	-0.633403	0.52647	0.626169		14132.5	-0.374862	0.771179	0.242665	-1.54477	0.122402	0.259425
C01H6.1	col-61	24.5507	15.7473	27.7254	26.078	24.8885	20.7364	26.266	20.3711	28.3997	18.9946	36.0203	29.5396	16.3245	19.997	15.5289	31.6372	37.9442	43.3224	89.5258	53.3815	70.3808	33.2183	25.8207	28.7672		31.8819	0.0738305	1.05251	0.296003	0.249425	0.803032	0.846093		31.8819	0.174185	1.12833	0.300559	0.579537	0.562227	0.657767		31.8819	1.12154	2.17579	0.312803	3.58546	0.000336489	0.00343248
C01H6.5	nhr-23	987.694	1205.54	1424.6	1194.06	1211.76	1134.92	1955.81	2137.95	1745.57	959.728	992.992	959.051	2437.46	2630.13	2856.29	2072.24	1862.97	1978.04	1381.1	1340.6	1556.45	1296.7	1139.63	1173.46		1568.11	-0.0320031	0.978061	0.116145	-0.275546	0.782897	0.829153		1568.11	-1.00387	0.498659	0.116566	-8.61207	7.17529e-18	9.04302e-17		1568.11	-0.422333	0.746217	0.114638	-3.68404	0.000229562	0.0025635
C01H6.9	hasp-1	1375.78	1570.35	1379.75	834.496	797.988	667.553	996.088	985.963	1066	893.747	826.52	976.775	645.839	618.855	652.216	464.671	447.001	501.905	944.388	1714.27	1463	1244.5	1307.47	1075.18		977.096	-0.911297	0.531707	0.154246	-5.90807	3.46141e-09	3.77558e-08		977.096	-0.176537	0.884824	0.155272	-1.13695	0.255558	0.353494		977.096	-0.439885	0.737193	0.158867	-2.76889	0.00562478	0.0288235
C02A12.1	gst-33	7.55407	5.24909	10.6009	100.361	99.554	131.597	12.1228	12.2227	9.12848	88.9748	80.8023	98.4652	76.5213	70.5157	74.5389	597.152	608.032	510.358	70.9655	57.0211	57.6891	2343.07	2639.58	2332.54		420.609	3.81107	14.0361	0.309235	12.3242	6.71208e-35	2.93713e-32		420.609	3.00219	8.01215	0.290216	10.3447	4.42401e-25	8.9746e-24		420.609	2.95326	7.74496	0.156304	18.8944	1.26878e-79	4.62596e-76
C02B10.1	ivd-1	749.741	707.753	526.783	360.351	356.217	390.004	425.307	365.662	418.896	977.723	937.501	898.003	70.3996	66.3058	59.01	57.3424	62.9318	46.4923	362.47	420.986	374.979	769.952	651.386	829.455		453.569	-0.841348	0.558122	0.133485	-6.30296	2.92021e-10	4.35339e-09		453.569	1.2173	2.32511	0.133745	9.10163	8.89886e-20	1.29589e-18		453.569	-0.225402	0.855357	0.196763	-1.14555	0.251981	0.429124
C02B10.2	snpn-1	3801.58	2339.35	1538.76	2016.7	1732.08	1689.22	1062.76	971.703	1161.35	673.809	841.123	814.307	604.008	527.289	543.513	512.127	720.014	618.136	828.659	1218.07	1009.56	845.879	814.526	787.503		1153	-0.497652	0.708259	0.216533	-2.29827	0.0215461	0.0392847		1153	-0.456277	0.728865	0.218834	-2.08504	0.0370658	0.0694023		1153	0.143924	1.10491	0.220789	0.651862	0.51449	0.681501
C02B4.1	adt-1	192.629	416.428	819.53	708.058	787.877	693.075	1020.33	1014.48	901.691	1410.6	1260.71	1426.76	841.734	903.022	890.326	1068.74	851.431	1038.68	1239.17	832.265	886.105	1770.06	1903.69	1936.99		1033.93	0.614197	1.53071	0.278457	2.20572	0.0274037	0.0483529		1033.93	0.480835	1.39555	0.277002	1.73585	0.0825896	0.138232		1033.93	0.167094	1.12279	0.277534	0.602065	0.547131	0.707139
C02B4.2	nhr-17	1177.49	1089.19	1025.02	1032.06	1054.65	944.305	574.821	659.006	623.78	616.825	620.133	614.423	556.054	538.867	472.08	564.526	591.374	526.208	802.457	797.082	919.565	1070.1	1051.61	1150.69		794.68	-0.118267	0.921294	0.0894381	-1.32234	0.186056	0.254911		794.68	-0.00476959	0.996699	0.0956424	-0.049869	0.960227	0.976443		794.68	0.103178	1.07414	0.0974781	1.05847	0.28984	0.468996
C02B8.12	C02B8.12	7.55407	4.37424	4.07727	8.69267	6.22213	9.57066	3.03069	5.09278	3.04283	12.9963	20.444	17.7237	13.2637	22.1019	17.5995	13.8413	18.5094	12.6797	19.652	8.4925	10.384	48.641	48.1204	49.144		16.0521	0.630663	1.54828	0.480057	1.31372	0.188939	0.258319		16.0521	2.19872	4.59072	0.52651	4.17603	2.96642e-05	0.000104003		16.0521	-0.2237	0.856366	0.366277	-0.610741	0.541371	0.702684
C02B8.4	hlh-8	149.193	91.8591	70.9444	180.175	164.886	161.904	166.688	198.619	195.755	143.959	155.763	134.897	173.448	181.025	143.902	174.005	198.05	165.893	165.95	131.027	155.761	99.6548	126.756	107.877		151.583	0.708573	1.63419	0.189206	3.74499	0.000180399	0.000563388		151.583	-0.368213	0.774742	0.187511	-1.96369	0.0495664	0.0893467		151.583	0.111601	1.08043	0.186624	0.598002	0.549839	0.70822
C02B8.5	frpr-1	4.72129	3.4994	5.70817	6.32194	5.44436	10.3682	0	1.01856	0	4.99859	4.86761	0.984652	8.16227	7.36732	13.4584	10.8753	10.1801	10.5664	12.0096	4.85286	11.5378	26.1001	10.563	23.9727		8.23244	0.660904	1.58107	0.559681	1.18086	0.237659	0.31285		8.23244	3.31443	9.94815	1.2982	2.55309	0.0106771	0.0232245		8.23244	0.124372	1.09003	0.498013	0.249737	0.802791	0.889388
C02C2.1	tyr-1	16.0524	25.3706	34.249	30.8195	35.7772	31.9022	19.1944	30.5567	20.2855	108.969	116.823	111.266	29.5882	18.9445	46.5868	48.4445	56.4535	69.7384	36.0287	50.955	25.3832	2078.51	2093.83	2616.62		323.014	0.366098	1.28886	0.274293	1.3347	0.181976	0.250187		323.014	2.26754	4.81502	0.266391	8.51206	1.70864e-17	2.10104e-16		323.014	0.872034	1.83024	0.263011	3.31558	0.00091454	0.00737702
C02C2.3	cup-4	341.822	262.455	230.773	481.258	529.659	421.109	390.959	373.81	376.296	195.945	220.016	240.255	3170.02	2845.89	2824.2	2955.11	3332.61	4270.95	569.908	509.55	498.434	385.569	370.879	412.33		1092.08	0.780942	1.71825	0.14921	5.23386	1.66005e-07	1.10064e-06		1092.08	-0.797958	0.575163	0.154606	-5.16123	2.45334e-07	1.11995e-06		1092.08	0.256097	1.19424	0.139159	1.84032	0.065721	0.16839
C02C2.5	sup-18	129.363	128.603	136.181	190.449	167.22	215.34	55.5627	49.9093	57.8137	93.9734	85.6699	91.5726	113.251	145.241	130.443	152.254	156.404	133.137	106.994	52.1682	56.5354	45.0819	58.6834	52.7399		108.525	0.539019	1.45298	0.176007	3.06248	0.00219512	0.00527778		108.525	0.731709	1.66061	0.209711	3.48913	0.000484603	0.00139691		108.525	0.185869	1.1375	0.183537	1.01271	0.311198	0.489909
C02C6.2	olrn-1	251.173	326.319	481.933	358.77	368.661	386.814	766.765	894.293	843.878	1877.47	1834.11	1908.26	498.919	533.604	538.337	731.61	597.852	721.687	810.099	609.034	586.122	2296.81	2585.59	2527.92		972.334	0.0700005	1.04972	0.168015	0.416633	0.676947	0.739038		972.334	1.16577	2.24353	0.161996	7.19629	6.18738e-13	5.02609e-12		972.334	0.384502	1.30541	0.165567	2.32234	0.0202146	0.0727207
C02C6.3	lron-3	1267.19	1189.79	1403.39	1888.68	1869.75	1918.12	1928.53	2043.22	1798.31	1528.57	1520.64	1354.88	1603.89	1449.26	1394.5	1840.89	1912.02	1913.58	5046.2	4008.46	4232.08	3245.9	3227.59	3292.65		2203.25	0.555884	1.47007	0.0935436	5.94251	2.8069e-09	3.14466e-08		2203.25	-0.389745	0.763264	0.0939147	-4.14999	3.32484e-05	0.00011598		2203.25	0.349329	1.27397	0.0940029	3.71615	0.000202282	0.00230475
C02D4.1	jud-4	87.816	92.734	124.764	114.585	148.553	157.916	32.3274	28.5196	31.4426	292.917	302.765	264.871	107.13	117.877	112.844	150.277	155.479	138.42	94.9847	33.97	51.9202	74.7411	64.5518	70.7194		118.839	0.460331	1.37586	0.206676	2.2273	0.025927	0.0460642		118.839	3.2209	9.32369	0.241058	13.3615	1.01438e-40	4.25199e-39		118.839	0.395754	1.31563	0.209447	1.88952	0.058822	0.155918
C02D4.2	ser-2	36.8261	62.1143	96.2235	76.6536	94.8875	78.1604	39.399	48.8907	49.6995	35.9898	58.4113	53.1712	45.9128	59.991	59.01	59.3197	61.0809	64.4552	90.6175	60.6607	68.0732	105.587	97.4145	128.254		67.9501	0.34658	1.27154	0.248382	1.39535	0.162909	0.227498		67.9501	0.0981542	1.0704	0.273902	0.358355	0.720078	0.789941		67.9501	0.164795	1.12101	0.26467	0.622642	0.53352	0.697959
C02D5.1	acdh-6	292.72	300.948	291.932	539.736	622.991	676.326	482.89	500.111	490.91	844.761	882.011	788.706	377.505	395.73	334.39	671.302	598.778	663.572	493.484	379.736	366.903	424.719	416.652	415.926		510.531	1.0542	2.07657	0.114302	9.22297	2.88972e-20	3.6435e-18		510.531	0.77123	1.70672	0.11117	6.93738	3.99441e-12	2.99759e-11		510.531	0.803422	1.74524	0.114557	7.01331	2.32745e-12	3.3278e-10
C02D5.2	C02D5.2	696.863	664.885	621.375	983.062	1062.43	996.943	790	785.307	671.451	549.844	625.974	542.543	1470.23	1467.15	1408.99	1583.84	1656.59	1476.13	493.484	431.905	544.585	469.801	484.725	433.906		871.334	0.618292	1.53506	0.0950588	6.50431	7.80499e-11	1.36294e-09		871.334	-0.386621	0.764919	0.098534	-3.92373	8.7189e-05	0.000283785		871.334	0.118301	1.08546	0.0922392	1.28255	0.199651	0.366586
C02E11.1	nra-4	4473.9	5181.73	5609.5	4481.47	4287.82	4094.65	6176.55	6043.1	6217.51	3621.97	3385.91	3728.88	7361.34	8112.47	7856.61	6402.58	5529.67	6578.66	5702.35	7979.31	7425.75	4553.27	4833.17	4720.22		5598.27	-0.247057	0.842613	0.110995	-2.22583	0.0260254	0.046217		5598.27	-0.78007	0.582338	0.111258	-7.01136	2.36005e-12	1.81416e-11		5598.27	-0.333923	0.793376	0.110799	-3.01377	0.00258023	0.0161926
C02F12.1	tsp-17	569.388	527.534	517.813	846.35	832.21	807.125	1394.12	1442.28	1366.23	751.787	761.294	631.162	552.994	548.339	488.644	524.98	521.038	384.618	560.082	416.133	493.819	526.747	489.42	424.317		682.434	0.622848	1.53991	0.124148	5.01698	5.24913e-07	3.03406e-06		682.434	-0.970821	0.510216	0.122801	-7.90563	2.66589e-15	2.68251e-14		682.434	-0.150751	0.900781	0.128122	-1.17662	0.239347	0.413485
C02F12.3	snet-1	152.97	132.977	149.228	191.239	168.775	190.616	319.233	316.771	338.768	1287.64	1440.81	1445.47	277.517	236.807	261.922	370.748	325.765	405.751	644.149	374.883	426.9	2588.65	2457.66	2948.64		727.245	0.339623	1.26543	0.166029	2.04556	0.0407993	0.0681483		727.245	2.0983	4.28203	0.151808	13.8221	1.87584e-43	8.78518e-42		727.245	0.504558	1.41869	0.158227	3.18883	0.00142851	0.0103959
C02F12.4	tag-52	1912.12	2163.5	1869.02	1258.07	1147.98	1205.9	2082.09	2078.87	2099.55	2205.38	2101.83	2113.06	1524.3	1463.99	1403.82	1109.28	1241.05	1183.44	1209.69	1808.9	1794.13	1869.71	1975.28	1838.71		1694.15	-0.718811	0.607598	0.114914	-6.25519	3.9704e-10	5.76871e-09		1694.15	0.036338	1.02551	0.114457	0.317482	0.750878	0.814659		1694.15	-0.313598	0.804633	0.116265	-2.69727	0.00699099	0.033576
C02F12.7	tag-278	2160.46	2593.05	3455.08	3379.08	3508.5	3688.69	3145.86	3363.27	2868.37	1816.49	1226.64	1732	3867.89	4035.18	3867.74	3842.93	2697.74	4444.24	3336.47	2388.82	2809.46	2002.59	2224.1	1927.4		2932.59	0.365402	1.28824	0.182486	2.00236	0.0452463	0.0747805		2932.59	-0.973722	0.509191	0.183243	-5.31382	1.07353e-07	5.15174e-07		2932.59	-0.0998589	0.933124	0.182467	-0.547272	0.584192	0.734977
C02F4.2	tax-6	990.527	1498.62	3016.36	1663.46	1934.3	1945.24	6465.48	6695.99	6217.51	5217.52	4715.74	5277.73	6146.19	7030.52	6219.86	6988.85	4668.99	8050.56	4838.76	3515.9	3965.55	5094.26	4741.62	5413.03		4679.69	0.00939328	1.00653	0.252328	0.0372265	0.970304	0.978459		4679.69	-0.349381	0.784921	0.251565	-1.38883	0.164885	0.246208		4679.69	0.0229589	1.01604	0.251509	0.0912843	0.927267	0.963744
C02F4.4	C02F4.4	486.293	351.689	312.319	926.955	842.321	964.244	808.185	1008.37	813.449	401.886	464.37	378.106	253.03	245.226	203.947	343.066	287.821	202.875	373.388	276.613	268.831	106.773	92.7198	73.1167		436.9	1.25015	2.37865	0.187476	6.66831	2.58763e-11	5.37693e-10		436.9	-1.07956	0.473174	0.188171	-5.7371	9.63105e-09	5.26826e-08		436.9	0.249012	1.18839	0.196204	1.26915	0.204388	0.372321
C02F5.13	C02F5.13	1233.2	921.216	501.504	693.833	605.88	567.859	485.921	484.833	560.895	524.851	543.225	491.341	85.7038	99.985	90.0679	59.3197	84.2176	38.0391	314.432	465.875	334.597	206.428	205.392	236.131		409.781	-0.507323	0.703527	0.236149	-2.14832	0.0316886	0.0549235		409.781	0.0259293	1.01814	0.238523	0.108708	0.913434	0.942119		409.781	-0.595431	0.661847	0.270749	-2.19919	0.0278641	0.0905057
C02F5.2	C02F5.2	14.1639	9.62334	16.3091	18.9658	14.7776	19.1413	0	5.09278	0	0.999717	1.94704	0	0	0	0	0	0	0	0	1.21321	0	1.18637	2.34734	2.39727		4.50686	0.39739	1.31712	0.524528	0.757615	0.448681	0.531318		4.50686	-0.779892	0.58241	1.14396	-0.681745	0.4954	0.597457		4.50686	0	1	1.72446	0	1	NA
C02F5.6	henn-1	993.36	933.464	670.303	611.648	566.214	515.22	652.609	625.394	711.007	483.863	513.046	499.219	1062.12	1138.78	1187.45	1213.09	968.04	982.678	554.623	803.148	766.112	828.084	863.82	791.099		788.932	-0.616363	0.652313	0.146223	-4.21524	2.49517e-05	9.53341e-05		788.932	-0.41078	0.752216	0.148798	-2.76066	0.00576838	0.0133714		788.932	-0.0989053	0.933741	0.144898	-0.682586	0.494869	0.664319
C02F5.8	tsp-1	91.5931	66.4885	40.7727	98.7804	83.221	75.7677	1.01023	3.05567	2.02855	14.9958	15.5763	9.84652	7.14198	11.5772	7.24684	12.8526	12.9566	9.50979	16.3767	15.7718	9.23026	109.146	131.451	194.179		43.3573	0.380433	1.30173	0.283118	1.34373	0.179037	0.246777		43.3573	2.73129	6.64048	0.679844	4.01752	5.88136e-05	0.000197355		43.3573	0.452596	1.3685	0.453617	0.997748	0.318401	0.497951
C02F5.9	pbs-6	4971.52	3815.22	2361.55	2083.87	2003.53	1713.94	2429.61	1985.17	2654.36	2165.39	2241.05	2066.78	2371.14	2074.43	3113.04	1621.41	2030.48	1219.37	2869.19	4360.29	3089.83	1608.71	1553.94	1594.18		2416.58	-0.942191	0.520442	0.222275	-4.23885	2.24667e-05	8.66854e-05		2416.58	-0.127052	0.9157	0.222654	-0.570626	0.568253	0.662875		2416.58	-0.633569	0.64458	0.222862	-2.84287	0.00447093	0.0242491
C02G6.3	C02G6.3	90.6488	74.3622	52.189	153.307	121.331	150.738	295.998	297.419	282.983	147.958	179.128	120.128	104.069	97.8801	99.3852	112.708	128.64	118.344	138.656	111.616	131.531	37.9637	39.9047	32.3631		129.969	0.977962	1.96968	0.17916	5.45858	4.79956e-08	3.68462e-07		129.969	-0.970256	0.510415	0.163658	-5.92858	3.0557e-09	1.75766e-08		129.969	0.256198	1.19433	0.180726	1.41761	0.156306	0.309639
C02H7.1	dyf-11	240.786	251.082	256.052	293.97	311.106	362.09	156.586	136.487	113.599	138.961	122.664	148.682	182.631	169.448	181.171	197.732	131.416	211.329	145.206	144.373	151.146	86.6047	143.188	101.884		182.425	0.370388	1.2927	0.163517	2.26513	0.0235045	0.0423879		182.425	0.0125421	1.00873	0.181087	0.0692602	0.944783	0.966828		182.425	0.0157148	1.01095	0.174535	0.0900381	0.928257	0.964224
C02H7.2	npr-19	8.49832	6.99879	17.94	7.90243	15.5553	13.5584	42.4297	38.7052	35.4997	40.9884	41.8614	40.3707	28.5679	28.4168	38.3047	44.4898	57.379	31.6993	72.0573	53.3815	50.7664	52.2001	18.7787	46.7468		34.7124	0.129053	1.09358	0.400077	0.32257	0.747021	0.799007		34.7124	0.0792217	1.05645	0.310911	0.254805	0.798874	0.853429		34.7124	0.49321	1.40757	0.316054	1.56052	0.118636	0.254439
C02H7.3	aex-3	541.06	730.499	1486.57	999.657	1112.21	1044.8	2447.79	2533.15	2284.15	2060.42	1953.86	2123.89	2151.78	2570.14	2279.65	2715.86	1773.2	2949.09	1860.39	1693.65	1657.99	1569.56	1393.15	1598.98		1813.81	0.193858	1.14382	0.234392	0.827069	0.408198	0.491755		1813.81	-0.243175	0.844884	0.2332	-1.04277	0.297053	0.399883		1813.81	0.0871267	1.06225	0.233115	0.37375	0.70859	0.826991
C03A3.1	C03A3.1	976.363	828.482	759.187	1391.62	1333.09	1279.28	1988.13	2410.92	1883.51	833.764	923.872	819.23	979.472	915.652	786.8	914.513	1022.64	823.125	1418.22	1153.77	1256.47	664.365	688.944	652.057		1112.64	0.643866	1.56251	0.123166	5.22763	1.71701e-07	1.13335e-06		1112.64	-1.28565	0.410185	0.123204	-10.4351	1.71364e-25	3.65208e-24		1112.64	0.0421601	1.02965	0.124888	0.337583	0.735677	0.846499
C03A3.2	C03A3.2	1053.79	1076.94	1125.33	831.336	936.43	847.801	501.074	545.946	434.11	572.838	508.178	544.513	1073.34	1101.94	1261.99	1152.78	944.903	1005.92	1312.32	1271.45	1013.02	1001.29	931.893	993.668		918.45	-0.31614	0.803216	0.112494	-2.8103	0.00494961	0.0107316		918.45	0.13411	1.09742	0.118972	1.12724	0.259639	0.358096		918.45	-0.147485	0.902823	0.112949	-1.30576	0.191633	0.35675
C03A3.3	C03A3.3	116.144	94.4837	74.2062	180.175	160.22	195.401	690.998	753.732	619.723	726.794	672.703	692.21	140.799	97.8801	92.1384	219.483	197.125	215.555	68.782	50.955	48.4589	7.1182	15.2577	16.7809		256.13	0.917349	1.88864	0.172533	5.31696	1.05517e-07	7.46144e-07		256.13	0.0188947	1.01318	0.14924	0.126606	0.899252	0.930953		256.13	0.932482	1.90856	0.173323	5.38002	7.44788e-08	3.54967e-06
C03B1.13	C03B1.13	209.625	237.959	205.494	208.624	220.108	196.198	90.9208	111.023	103.456	155.956	152.843	136.867	162.225	196.813	163.572	149.288	137.895	157.44	327.533	359.112	353.058	847.065	889.641	932.538		279.386	-0.0630668	0.957227	0.114808	-0.549323	0.582784	0.66047		279.386	0.5454	1.45943	0.13885	3.92799	8.566e-05	0.000279168		279.386	-0.234661	0.849884	0.128545	-1.82552	0.0679227	0.172696
C03B1.2	C03B1.2	2.83277	3.4994	7.33908	3.95121	3.88883	3.19022	39.399	53.9835	38.5425	32.9907	41.8614	26.5856	21.426	16.8396	14.4937	13.8413	31.4659	24.3028	17.4684	10.9189	10.384	28.4728	17.605	21.5754		20.2858	-0.337019	0.791675	0.579949	-0.581119	0.56116	0.639962		20.2858	-0.378273	0.769358	0.305212	-1.23938	0.215205	0.306967		20.2858	0.403746	1.32294	0.356688	1.13193	0.257663	0.434498
C03B1.5	C03B1.5	60.4325	41.1179	45.6654	52.156	50.5548	40.6753	23.2353	24.4454	27.3855	30.9912	20.444	18.7084	490.756	451.511	465.868	411.284	481.243	481.829	108.086	196.541	160.376	105.587	97.4145	106.678		166.374	-0.0319486	0.978098	0.218566	-0.146173	0.883784	0.911223		166.374	-0.0999617	0.933058	0.285155	-0.350552	0.725925	0.794746		166.374	-0.0351164	0.975953	0.164072	-0.214031	0.830523	0.905529
C03B1.7	C03B1.7	362.595	395.432	404.465	286.068	321.217	290.31	4993.57	4986.85	4794.48	8020.73	6894.48	7977.65	1261.07	1282.97	1128.44	962.957	777.393	1230.99	334.084	394.295	404.978	1065.36	1104.42	1060.79		2113.98	-0.373616	0.771845	0.135562	-2.75606	0.00585029	0.0124344		2113.98	0.631738	1.54943	0.123332	5.12227	3.01878e-07	1.36006e-06		2113.98	-0.306866	0.808396	0.127512	-2.40656	0.0161036	0.0615985
C03B8.3	C03B8.3	11.3311	6.12394	9.78544	3.16097	3.11106	8.7731	3.03069	3.05567	6.08566	4.99859	4.86761	5.90791	6.1217	5.26237	0	0	2.7764	4.22657	6.55067	4.85286	9.23026	0	3.52101	3.5959		4.84873	-0.857074	0.552071	0.611406	-1.40181	0.160972	0.225385		4.84873	0.373954	1.2959	0.707744	0.528374	0.59724	0.687596		4.84873	-0.716405	0.608612	0.826626	-0.866662	0.386127	NA
C03B8.4	lin-13	3130.22	4654.2	7469.55	3359.32	3376.28	3005.98	5655.27	4944.07	5815.86	7399.91	6166.29	6870.9	5274.87	5844.39	5851.31	3738.13	2569.1	3501.71	8405.6	11616.5	12877.4	8961.81	7775.56	9276.23		6147.52	-0.647105	0.638561	0.215747	-2.99937	0.00270541	0.00635879		6147.52	0.316151	1.245	0.21561	1.46631	0.142564	0.218247		6147.52	-0.79094	0.577967	0.21586	-3.66413	0.000248181	0.00271325
C03C10.1	kin-19	11116.8	11403.7	10858.6	9503.46	9130.97	9620.1	6824.11	6913.96	6563.38	6834.07	6419.4	6544	5917.64	6107.5	6088.38	5364.48	4977.17	6397.97	6027.7	7280.5	6531.56	7443.26	7475.1	7584.96		7455.36	-0.240451	0.846481	0.0832573	-2.88805	0.0038764	0.0086311		7455.36	-0.0362785	0.975167	0.0838247	-0.43279	0.665167	0.74412		7455.36	-0.114077	0.923973	0.0840304	-1.35757	0.1746	0.335136
C03C10.3	rnr-2	25808.5	20585.2	12240.8	8178.22	7828.99	6928.36	6667.52	5474.74	7140.5	12348.5	12757	12247.1	4932.05	5331.83	6192.94	4866.2	5426.02	4059.62	11107.7	23594.6	15077.6	105933	104157	100162		22043.6	-1.35413	0.391171	0.226259	-5.98488	2.16556e-09	2.49375e-08		22043.6	0.953896	1.9371	0.226395	4.21342	2.51536e-05	8.90944e-05		22043.6	-0.197397	0.872123	0.226638	-0.870979	0.383765	0.562496
C03C10.4	rei-1	5431.37	3788.1	2124.26	2908.09	2382.3	2378.31	1735.58	1573.67	1893.65	1864.47	1922.71	1935.83	1767.13	1517.67	1836.56	1449.38	1819.47	1424.35	1755.58	3178.62	2210.65	2186.47	2186.55	2061.65		2222.18	-0.564654	0.676118	0.22972	-2.45801	0.0139708	0.0268897		2222.18	0.137456	1.09996	0.230565	0.596171	0.551061	0.648101		2222.18	-0.125839	0.916471	0.230773	-0.545294	0.585551	0.735799
C03C11.2	fog-3	26.4392	17.497	19.5709	12.6439	14.7776	11.1658	2.02046	1.01856	2.02855	4.99859	4.86761	3.93861	15.3043	18.9445	18.6347	20.7619	18.5094	19.0196	39.304	75.2193	39.2286	24.9137	12.9104	11.9863		18.1543	-0.712144	0.610412	0.365007	-1.95104	0.0510523	0.0831206		18.1543	1.44445	2.72159	0.791738	1.82441	0.0680908	0.117571		18.1543	0.140869	1.10257	0.371477	0.379214	0.704529	0.824652
C03D6.6	lab-1	651.538	517.911	265.022	262.361	216.997	235.279	65.665	55.0021	88.242	65.9813	47.7026	62.0331	35.7099	28.4168	35.1989	29.6599	47.1989	26.4161	40.3958	66.7268	35.7673	3.5591	7.04201	3.5959		120.559	-1.00429	0.498514	0.272781	-3.68168	0.000231702	0.000706697		120.559	-0.250173	0.840796	0.304345	-0.822004	0.411074	0.516618		120.559	0.0624836	1.04426	0.335229	0.186391	0.852138	0.917707
C03D6.8	rpl-24.2	4928.08	3621.87	2173.18	3923.56	3938.61	3597.77	2647.81	2382.4	2600.6	3993.87	4437.31	4157.2	2430.32	2048.11	1781.69	2194.83	2644.99	1874.48	2393.18	2579.3	2705.62	7168.02	7568.99	6665.61		3519.06	0.0961251	1.0689	0.192211	0.500101	0.617004	0.690002		3519.06	0.722185	1.64968	0.192539	3.75086	0.000176233	0.000547533		3519.06	0.101205	1.07267	0.193088	0.524138	0.600183	0.747742
C03E10.4	gly-20	2268.11	2115.38	1524.08	1483.29	1472.31	1336.7	1510.3	1342.46	1582.27	1262.64	1254.87	1229.83	2027.3	1837.62	2608.86	1776.63	2133.2	1955.85	1310.13	1996.95	1407.62	830.456	836.826	792.297		1579	-0.460484	0.726742	0.160551	-2.86816	0.00412873	0.00910572		1579	-0.243085	0.844937	0.161581	-1.50441	0.132475	0.205539		1579	-0.142256	0.906101	0.160528	-0.886176	0.375522	0.554763
C03F11.1	kcnl-3	19.8294	26.2455	33.4336	32.4	43.5549	45.4606	25.2558	36.668	34.4854	93.9734	69.12	110.281	86.7241	84.1979	76.6095	104.798	91.6213	86.6447	41.4876	27.9039	19.6143	138.805	140.84	135.446		66.8917	0.599427	1.51512	0.250759	2.39045	0.0168278	0.0317084		66.8917	1.50351	2.83532	0.236688	6.35228	2.1214e-10	1.36747e-09		66.8917	0.194051	1.14397	0.206368	0.940314	0.347057	0.52625
C03F11.2	C03F11.2	55.7112	67.3634	114.163	96.4096	122.887	134.787	119.207	142.598	121.713	76.9782	93.4581	95.5112	292.821	331.529	296.085	498.286	449.777	572.7	311.157	249.922	287.292	105.587	131.451	100.685		202.837	0.568681	1.48317	0.201742	2.81885	0.00481961	0.0104895		202.837	-0.527609	0.693703	0.204051	-2.58568	0.00971873	0.0213976		202.837	0.723869	1.6516	0.17921	4.03923	5.36272e-05	0.000824639
C03F11.3	scav-1	431.526	455.796	435.452	591.892	619.88	606.142	795.052	885.126	838.806	364.897	399.144	397.799	835.612	876.711	857.198	959.002	1064.29	1047.13	691.095	494.992	483.435	429.465	497.636	487.844		647.747	0.45866	1.37426	0.112216	4.08729	4.36437e-05	0.000158219		647.747	-1.11625	0.461291	0.113636	-9.82301	8.96309e-23	1.58885e-21		647.747	0.257044	1.19503	0.108716	2.36435	0.0180616	0.067128
C03G5.7	flp-5	162.412	136.476	164.722	219.688	188.997	237.671	79.8082	81.4845	89.2563	341.903	402.064	390.907	228.543	173.658	204.982	323.293	318.361	487.112	221.631	149.225	179.99	587.251	596.224	715.585		278.385	0.479115	1.39389	0.17768	2.6965	0.00700719	0.0146077		278.385	2.17951	4.53001	0.187953	11.5961	4.31396e-31	1.23977e-29		278.385	0.892259	1.85608	0.174555	5.11163	3.19385e-07	1.28672e-05
C03H12.1	C03H12.1	1219.98	1297.4	1341.42	1108.71	1019.65	996.943	912.238	894.293	886.477	627.822	574.378	592.76	1325.35	1310.33	1134.65	1020.3	1071.69	1205.63	889.799	1017.89	1130.71	1221.96	1397.84	1300.52		1062.45	-0.304488	0.809729	0.0975681	-3.12077	0.00180376	0.00442553		1062.45	-0.585395	0.666467	0.102217	-5.72698	1.02236e-08	5.55631e-08		1062.45	-0.193773	0.874316	0.0985796	-1.96565	0.0493386	0.136849
C03H5.2	nstp-4	930.094	885.347	848.887	911.94	935.653	1084.67	937.494	882.07	970.662	697.802	733.062	708.949	1672.24	1559.77	1567.39	1615.47	1753.76	1765.65	598.294	599.328	674.963	800.797	791.053	750.345		1028.15	0.13874	1.10094	0.0831232	1.66909	0.0950988	0.14312		1028.15	-0.382844	0.766924	0.0859038	-4.45666	8.32473e-06	3.13603e-05		1028.15	0.0973745	1.06982	0.0807117	1.20645	0.227645	0.399014
C03H5.6	C03H5.6	151.081	142.6	268.284	138.293	171.886	177.855	403.082	393.163	402.668	456.871	442.952	468.694	108.15	148.399	119.055	151.265	152.702	142.647	902.9	573.851	655.349	523.188	558.666	607.708		344.221	-0.206988	0.866344	0.200137	-1.03423	0.301027	0.381944		344.221	0.190868	1.14145	0.191598	0.996194	0.319156	0.423624		344.221	0.250904	1.18995	0.209291	1.19883	0.230595	0.402541
C04A11.1	C04A11.1	104.813	108.481	204.679	157.258	169.553	180.247	363.683	325.938	317.468	483.863	411.8	494.295	203.036	239.964	275.38	319.338	284.119	222.952	305.698	224.445	220.373	494.715	448.342	489.043		293.728	0.273729	1.20893	0.205481	1.33214	0.182815	0.251069		293.728	0.464752	1.38008	0.195458	2.37776	0.017418	0.0356969		293.728	0.203173	1.15123	0.200311	1.01429	0.310443	0.489345
C04A11.2	C04A11.2	671.368	728.749	695.582	546.058	530.436	543.932	1380.99	1459.59	1388.54	1365.61	1274.34	1299.74	1449.82	1591.34	1198.83	1134	1086.5	1191.89	829.751	1293.29	1439.92	1205.35	1389.62	1189.05		1120.18	-0.371181	0.773149	0.147188	-2.52181	0.0116754	0.022977		1120.18	-0.102292	0.931552	0.144222	-0.709268	0.478158	0.582683		1120.18	-0.313411	0.804737	0.144542	-2.16831	0.0301351	0.0961266
C04A11.4	adm-2	684.587	841.605	1144.9	746.78	860.209	845.408	1329.46	1414.78	1256.69	1854.48	1797.12	1890.53	4132.15	4538.27	4003.36	3644.21	2811.57	4248.76	1824.36	1726.4	1630.3	4300.58	3981.09	4546.42		2335.58	-0.124266	0.917471	0.153785	-0.808051	0.419061	0.502887		2335.58	0.470106	1.38521	0.152299	3.08673	0.0020237	0.00514884		2335.58	-0.24383	0.844501	0.150531	-1.61979	0.105277	0.234122
C04A2.1	tbc-6	167.134	165.346	122.318	153.307	140.776	145.155	81.8287	91.6701	80.1278	64.9816	57.4378	52.1866	66.3184	52.6237	51.7631	57.3424	51.8262	46.4923	110.27	75.2193	110.763	85.4184	116.193	116.268		94.2819	-0.0473527	0.96771	0.166612	-0.28421	0.77625	0.823403		94.2819	-0.538996	0.68825	0.200203	-2.69225	0.00709711	0.0160974		94.2819	-0.13222	0.912426	0.214065	-0.617665	0.536796	0.700383
C04A2.3	egl-27	5671.22	7333.86	7445.09	7122.46	7342.11	6580.62	11339.8	11624.8	10439.9	8981.46	8020.84	8493.61	8140.84	7957.75	6330.63	5898.36	5037.32	6725.53	7253.77	8934.11	8279.55	5957.93	6231.01	5893.69		7626.51	0.0412797	1.02903	0.126292	0.326859	0.743775	0.796608		7626.51	-0.389787	0.763242	0.126198	-3.08868	0.00201048	0.0051169		7626.51	-0.34493	0.787346	0.126472	-2.72732	0.00638513	0.0317385
C04A2.7	dnj-5	6036.64	8285.69	10396.2	4754.1	4899.93	4566	7089.8	7078.97	7224.69	7085.99	6442.77	6738.96	5615.64	6005.41	6312	4952.21	4306.2	5172.27	2732.72	3353.33	2977.91	2432.05	2363.77	2291.79		5379.79	-0.797813	0.57522	0.136429	-5.84783	4.98034e-09	5.14566e-08		5379.79	-0.0779927	0.947375	0.136468	-0.57151	0.567654	0.662278		5379.79	-0.313563	0.804652	0.136699	-2.29382	0.0218007	0.0768345
C04C11.1	C04C11.1	44.3801	27.1203	43.219	56.1072	58.3325	55.0313	16.1637	10.1856	19.2712	29.9915	25.3116	23.6316	27.5477	33.6792	26.9168	33.6145	37.0187	33.8126	58.956	35.1832	36.921	157.787	166.661	183.391		51.6764	0.563913	1.47827	0.222377	2.53584	0.0112177	0.0221761		51.6764	0.789509	1.72849	0.310046	2.54643	0.0108832	0.0236187		51.6764	0.247728	1.18734	0.26079	0.949913	0.342156	0.52166
C04C3.2	lgc-9	15.1081	16.6221	6.52363	7.11219	8.55543	10.3682	13.133	7.1299	12.1713	25.9926	42.835	28.5549	26.5274	13.6822	23.811	16.8073	25.9131	17.9629	32.7533	26.6907	24.2294	22.541	24.647	41.9522		20.4843	-0.541773	0.686926	0.420295	-1.28903	0.197388	0.267706		20.4843	1.58667	3.00354	0.389304	4.07564	4.58871e-05	0.00015654		20.4843	-0.0732021	0.950526	0.364465	-0.200848	0.840817	0.911302
C04C3.3	pdhb-1	918.763	872.224	874.166	619.55	641.657	677.921	1691.13	1703.03	1607.63	1794.49	1713.4	1659.14	1028.45	1148.25	1162.6	1106.31	1040.23	979.508	1836.37	2035.77	1773.36	3416.73	3346.13	3860.8		1562.82	-0.45853	0.727727	0.0863631	-5.30933	1.1003e-07	7.73643e-07		1562.82	0.0468554	1.03301	0.0821338	0.570477	0.568354	0.662891		1562.82	-0.0947177	0.936455	0.085037	-1.11384	0.265348	0.441459
C04C3.5	dyf-3	163.357	163.597	166.352	201.512	204.552	240.064	50.5115	70.2804	72.0136	44.9873	53.5437	55.1405	161.205	138.927	131.478	182.903	193.423	187.026	40.3958	24.2643	48.4589	28.4728	35.2101	41.9522		112.484	0.388896	1.30939	0.144609	2.6893	0.00716014	0.0148908		112.484	-0.326205	0.797632	0.197409	-1.65243	0.098446	0.160384		112.484	0.384212	1.30515	0.152706	2.51602	0.0118689	0.0490358
C04C3.6	C04C3.6	2.83277	1.7497	4.07727	0.790243	6.99989	3.19022	0	2.03711	0	9.99717	3.89409	4.92326	4.08113	3.15742	7.24684	15.8186	24.0622	12.6797	1.09178	1.21321	3.46135	15.4228	18.7787	19.1782		6.94515	0.336553	1.26274	0.70399	0.478064	0.632605	0.702904		6.94515	3.20892	9.24656	1.13471	2.82796	0.0046846	0.0110757		6.94515	1.8657	3.64444	0.570522	3.27016	0.00107487	NA
C04D8.1	pac-1	2019.77	3202.82	5112.89	2782.45	3419.84	2987.64	6198.78	6358.85	5959.89	5999.3	5663.95	6104.84	6332.9	6872.65	6761.3	5745.12	4300.65	5631.91	2948.89	3343.62	3208.67	2593.4	2713.52	2919.87		4549.31	-0.169747	0.888999	0.201268	-0.843389	0.399011	0.482877		4549.31	-0.0596033	0.959528	0.200955	-0.2966	0.766772	0.827171		4549.31	-0.348944	0.785158	0.20098	-1.73622	0.0825253	0.196982
C04E6.11	C04E6.11	418.306	566.027	542.276	335.063	346.106	347.734	355.601	378.903	401.653	338.904	271.613	290.472	137.738	143.136	126.302	125.56	112.907	101.438	168.134	179.556	198.451	96.0957	82.1568	89.8976		256.418	-0.57062	0.673327	0.124695	-4.57612	4.73683e-06	2.17146e-05		256.418	-0.33494	0.792817	0.12998	-2.57686	0.00997037	0.0218502		256.418	-0.258799	0.835784	0.155251	-1.66697	0.0955199	0.218211
C04E6.12	C04E6.12	100.091	61.2394	60.3435	169.902	127.554	149.94	41.4195	42.7794	43.6139	21.9938	40.8879	25.6009	79.5821	72.6207	56.9395	94.9116	98.0996	70.7951	61.1396	49.7418	64.6118	16.6091	23.4734	13.185		66.1281	1.01898	2.02649	0.219505	4.64219	3.44738e-06	1.63971e-05		66.1281	-0.528311	0.693366	0.275529	-1.91744	0.0551823	0.0982789		66.1281	0.337739	1.26377	0.23311	1.44884	0.147383	0.296815
C04E6.6	grd-9	0	0.874849	0.815453	1.58049	0	0	1.01023	4.07423	5.07138	39.9887	31.1527	32.4935	1.02028	0	3.10579	1.97732	0	1.05664	1.09178	6.06607	6.9227	7.1182	8.21568	8.39044		6.7511	-0.147459	0.902839	1.48609	-0.0992262	0.920959	0.941028		6.7511	3.35207	10.2112	0.594096	5.64231	1.67781e-08	8.86461e-08		6.7511	-0.480504	0.716727	1.15678	-0.415382	0.677862	NA
C04E6.7	C04E6.7	133.14	109.356	90.5153	212.575	193.664	226.506	56.5729	55.0021	58.828	120.966	151.869	157.544	19.3854	25.2594	27.9521	53.3878	37.0187	48.6056	63.3231	49.7418	46.1513	198.123	208.913	215.754		106.673	0.931026	1.90663	0.160908	5.78607	7.20539e-09	7.04348e-08		106.673	1.33714	2.52649	0.186955	7.1522	8.53991e-13	6.86359e-12		106.673	0.93357	1.91	0.249748	3.73805	0.000185451	0.00215336
C04F1.3	lim-7	1213.37	1105.81	1228.07	1449.31	1475.42	1368.6	1502.21	1529.87	1435.2	852.759	830.414	845.816	1295.76	1384	1179.16	1289.22	1167.02	1267.97	1200.96	1178.03	1318.77	1146.03	1065.69	1097.95		1226.14	0.275403	1.21033	0.0771451	3.56993	0.000357075	0.00104619		1226.14	-0.820872	0.5661	0.079613	-10.3108	6.29839e-25	1.26753e-23		1226.14	-0.0516282	0.964847	0.0785258	-0.657468	0.51088	0.678025
C04F12.10	fce-1	1848.86	1638.59	1416.44	1861.81	1907.08	1710.75	2785.21	2999.65	2626.97	3901.9	4232.87	3792.88	1553.89	1500.83	1548.75	1600.64	1770.42	1652.59	1236.98	1424.31	1349.93	2411.88	2306.26	2418.84		2145.76	0.160988	1.11805	0.0934958	1.72187	0.0850924	0.130408		2145.76	0.503847	1.41799	0.092153	5.4675	4.56423e-08	2.30245e-07		2145.76	0.12619	1.09141	0.094592	1.33405	0.182189	0.344444
C04F12.5	C04F12.5	910.265	727.874	362.877	498.643	349.217	460.987	35.3581	40.7423	44.6281	24.9929	39.9144	31.5089	99.9878	64.2009	90.0679	89.9683	79.5902	107.778	56.7724	25.4775	64.6118	35.591	53.9888	56.3358		181.307	-0.611822	0.65437	0.280366	-2.18223	0.0290927	0.0509464		181.307	-0.323284	0.799248	0.339402	-0.952513	0.340837	0.446699		181.307	0.123186	1.08914	0.303893	0.405359	0.685214	0.810956
C04F12.8	C04F12.8	258.727	214.338	276.439	273.424	318.884	273.561	575.832	525.575	587.266	964.727	1047.51	939.358	659.103	624.117	624.264	690.086	611.734	612.853	500.034	332.421	416.516	912.316	836.826	963.702		584.984	0.20785	1.15497	0.132446	1.56932	0.116573	0.170505		584.984	0.805623	1.7479	0.123113	6.54377	5.99871e-11	4.03835e-10		584.984	0.00537113	1.00373	0.124168	0.0432569	0.965497	0.985809
C04F5.1	sid-1	466.464	530.158	534.937	305.034	353.884	263.991	1817.41	1556.35	1798.31	2431.31	2429.91	2460.65	1551.85	1513.46	2268.26	1037.11	1160.54	911.883	1644.22	2658.15	1745.67	1859.04	1631.4	1678.09		1442	-0.730916	0.602521	0.178423	-4.09655	4.19362e-05	0.000152699		1442	0.501461	1.41565	0.171908	2.91704	0.00353375	0.0085602		1442	-0.778079	0.583143	0.173005	-4.49744	6.87755e-06	0.00016717
C04F5.3	unc-46	61.3768	46.367	56.2663	90.8779	74.6655	85.3383	54.5525	57.0392	55.7852	53.9847	47.7026	51.2019	132.637	139.979	110.773	166.095	175.839	144.76	30.5698	33.97	46.1513	45.0819	29.3417	39.5549		76.2463	0.614838	1.53139	0.18387	3.34387	0.000826188	0.00220603		76.2463	-0.131049	0.913167	0.205349	-0.638177	0.523358	0.623543		76.2463	0.346509	1.27148	0.161174	2.1499	0.0315628	0.0994194
C04F5.9	C04F5.9	341.822	326.319	298.456	220.478	206.108	230.493	425.307	468.536	435.124	622.824	657.127	646.916	546.872	556.759	521.773	397.442	426.641	432.167	451.996	543.52	509.972	667.924	688.944	610.105		468.068	-0.555314	0.680509	0.101445	-5.47403	4.39925e-08	3.40541e-07		468.068	0.536111	1.45006	0.0924978	5.79593	6.79435e-09	3.76543e-08		468.068	-0.371784	0.772826	0.0941699	-3.94801	7.88036e-05	0.00112234
C04F6.3	cht-1	17835.2	19693.7	19730.7	13301.4	12813.7	12542.3	11389.3	11833.6	11023.2	35397	34968.9	33712.5	10266.1	10691	8205.49	7863.82	8686.44	7129.17	4205.53	11127.6	9559.09	22177.9	24294.9	21624.6		15836.4	-0.566777	0.675123	0.208008	-2.72479	0.00643433	0.0135174		15836.4	1.60366	3.03913	0.208025	7.70898	1.26829e-14	1.2119e-13		15836.4	-0.300459	0.811994	0.208216	-1.44301	0.149016	0.299099
C04F6.5	dhs-27	1663.78	1266.78	949.187	2019.07	1882.97	1819.22	994.067	955.406	951.391	549.844	573.404	538.605	1049.87	915.652	807.505	789.941	996.729	756.556	993.518	931.749	1083.4	1695.32	1813.32	1778.77		1157.34	0.561173	1.47547	0.151122	3.71337	0.000204517	0.000631811		1157.34	-0.80367	0.57289	0.155056	-5.1831	2.18234e-07	1.00348e-06		1157.34	-0.124258	0.917476	0.153842	-0.8077	0.419263	0.597997
C04F6.7	C04F6.7	0.944258	0.874849	3.26181	0.790243	1.55553	3.98777	84.8594	83.5216	79.1135	121.965	131.425	150.652	15.3043	8.41979	16.5642	16.8073	18.5094	22.1895	20.7438	13.3454	12.6916	41.5228	38.7311	35.959		38.4892	0.26653	1.20291	0.794675	0.335395	0.737327	0.791712		38.4892	0.707264	1.6327	0.194099	3.64383	0.000268609	0.000804871		38.4892	0.505607	1.41972	0.336657	1.50185	0.133137	0.274713
C04G2.6	dis-3	1487.21	1811.81	1564.04	1179.83	1165.09	1118.97	3158.99	3055.67	3059.06	3061.13	2990.66	3138.09	107.13	98.9325	118.02	73.161	74.0374	66.5685	1449.88	1867.14	1762.98	1823.44	1846.18	1905.83		1582.66	-0.489609	0.712218	0.0961162	-5.09393	3.50714e-07	2.13325e-06		1582.66	-0.0131119	0.990953	0.0940202	-0.139459	0.889088	0.923031		1582.66	-0.598377	0.660497	0.156993	-3.81149	0.00013813	0.00172178
C04G2.7	egl-38	262.504	257.206	320.473	421.199	445.66	461.784	508.146	584.651	479.753	303.914	338.786	348.567	507.081	574.651	554.901	560.572	543.25	394.128	533.879	505.911	556.123	397.433	361.49	426.714		443.699	0.659472	1.5795	0.131907	4.9995	5.74784e-07	3.28404e-06		443.699	-0.665549	0.630449	0.131931	-5.04468	4.54287e-07	1.99576e-06		443.699	-0.126019	0.916356	0.129169	-0.975617	0.329254	0.508778
C04G6.3	pld-1	969.753	1333.27	1923.65	1363.17	1437.31	1366.21	1564.85	1654.14	1500.11	3224.09	2847.55	3136.12	2354.81	2553.3	2518.79	2713.88	2070.27	2398.58	2708.7	2346.36	2569.47	4119.06	3856.68	4004.64		2355.62	-0.0214028	0.985274	0.160841	-0.133068	0.89414	0.919224		2355.62	0.964329	1.95116	0.160356	6.01367	1.81374e-09	1.06922e-08		2355.62	-0.0483111	0.967068	0.160066	-0.30182	0.76279	0.863437
C04H5.3	gcy-29	10.3868	10.4982	26.91	17.3853	21.7774	17.5462	8.08185	8.14845	4.0571	8.99745	12.6558	11.8158	23.4665	15.7871	26.9168	41.5238	22.2112	21.1329	5.45889	3.63964	1.15378	7.1182	10.563	0		14.0513	0.233388	1.17559	0.432655	0.539432	0.589589	0.666254		14.0513	0.723351	1.65101	0.534572	1.35314	0.17601	0.26031		14.0513	0.358506	1.2821	0.421018	0.851521	0.39448	0.573132
C04H5.6	mog-4	1814.86	2066.39	1877.99	1033.64	987.763	969.029	1309.26	1245.69	1363.19	1033.71	848.911	1077.21	2121.17	2191.25	2454.61	1689.62	1768.57	1603.98	1193.31	1949.64	1663.75	839.947	833.305	835.448		1448.84	-0.945574	0.519223	0.132384	-7.14267	9.15349e-13	2.93503e-11		1448.84	-0.404747	0.755369	0.133759	-3.02594	0.00247862	0.00617377		1448.84	-0.418613	0.748144	0.131852	-3.17486	0.00149909	0.0107239
C04H5.8	nlp-41	67.9866	43.7424	24.4636	60.8487	55.9992	62.2093	7.07162	8.14845	4.0571	10.9969	18.4969	12.8005	32.6491	30.5217	28.9874	43.5011	57.379	36.9825	24.0191	9.70572	8.07648	66.4365	88.0252	77.9113		36.709	0.404466	1.3236	0.298242	1.35617	0.175045	0.242038		36.709	1.1358	2.19741	0.473576	2.39835	0.0164689	0.0339565		36.709	0.585214	1.50026	0.323369	1.80974	0.0703363	0.176373
C05A2.1	pph-1	135.973	132.977	176.953	146.195	183.553	185.033	255.588	271.955	231.255	785.778	699.962	666.609	134.677	122.087	145.972	145.333	139.746	173.289	156.124	110.403	123.455	220.664	214.781	234.932		241.387	0.203986	1.15188	0.150677	1.35379	0.175803	0.242949		241.387	1.50407	2.83641	0.138444	10.8641	1.70971e-27	4.05361e-26		241.387	0.183782	1.13586	0.159008	1.15581	0.24776	0.424
C05A9.2	C05A9.2	2351.2	2188.87	1988.89	2867	2666.96	2487.57	2965.03	3308.27	3032.69	2863.19	2710.28	2655.61	3396.52	3286.88	2948.43	2984.77	2954.09	4890.14	2443.4	2690.91	3040.22	2283.76	2242.88	2187.51		2809.79	0.297179	1.22874	0.147906	2.00924	0.0445112	0.0737459		2809.79	-0.177432	0.884276	0.147878	-1.19986	0.230195	0.324867		2809.79	0.168713	1.12406	0.147668	1.14252	0.253238	0.430346
C05B10.1	lip-1	660.037	701.629	1070.69	868.477	953.541	916.39	489.962	559.188	489.895	590.833	572.431	585.868	1939.56	2029.17	2468.07	1911.08	1804.66	2133.36	1878.95	2569.59	1746.83	1172.13	1251.13	1226.2		1274.57	0.170002	1.12506	0.161961	1.04965	0.293881	0.374437		1274.57	0.184613	1.13651	0.165609	1.11475	0.264957	0.364106		1274.57	-0.138268	0.908609	0.159902	-0.864703	0.387202	0.566281
C05B5.12	C05B5.12	0	0.874849	0	0.790243	0.777766	0.797555	0	0	0	0	0	0	0	0	0	1.97732	0.925468	0	0	0	0	0	0	1.19863		0.30591	1.32807	2.51067	2.74157	0.484421	0.628087	NA		0.30591	0	1	2.86525	0	1	1		0.30591	2.35068	5.10064	2.74388	0.8567	0.391611	NA
C05B5.3	pqn-8	137.862	102.357	99.4853	242.605	216.997	215.34	96.9822	121.208	91.2848	64.9816	75.9347	71.8796	112.231	112.615	115.949	122.594	140.671	145.817	159.4	101.91	122.301	221.85	217.129	183.391		137.199	0.995016	1.9931	0.160613	6.19512	5.82396e-10	7.93488e-09		137.199	-0.539635	0.687945	0.185572	-2.90795	0.00363811	0.00879055		137.199	0.263044	1.20001	0.171277	1.53578	0.124592	0.262277
C05B5.4	C05B5.4	290.832	301.823	240.559	186.497	258.996	171.474	447.532	399.274	391.511	277.921	277.454	300.319	493.817	529.394	540.407	429.079	527.517	387.788	274.036	399.148	368.057	215.919	242.949	232.535		341.035	-0.431892	0.741289	0.161746	-2.67019	0.00758077	0.0156823		341.035	-0.533238	0.691002	0.15941	-3.34507	0.000822626	0.00226543		341.035	-0.216644	0.860565	0.155624	-1.3921	0.163893	0.320404
C05B5.8	C05B5.8	467.408	346.44	201.417	724.653	614.435	658.78	167.698	170.099	141.999	460.87	528.622	456.878	369.343	305.217	287.803	587.265	674.666	670.968	132.105	101.91	93.4564	221.85	239.428	231.336		368.944	0.979074	1.9712	0.197664	4.95323	7.29907e-07	4.07335e-06		368.944	1.59201	3.0147	0.205586	7.74378	9.6506e-15	9.38706e-14		368.944	1.00596	2.00828	0.199382	5.0454	4.52565e-07	1.7369e-05
C05C10.3	C05C10.3	1546.7	1570.35	979.359	811.579	791.766	786.389	492.993	370.755	540.609	524.851	516.94	576.021	706.036	675.688	948.301	770.168	846.803	751.273	532.788	590.836	515.741	1583.8	1464.74	1661.31		856.491	-0.777029	0.583568	0.163523	-4.75181	2.01606e-06	1.02582e-05		856.491	0.204078	1.15195	0.168459	1.21144	0.225726	0.319393		856.491	0.0236888	1.01656	0.165536	0.143104	0.886208	0.939063
C05C10.6	ufd-3	2584.44	3306.93	2982.11	1489.61	1441.98	1256.15	3130.71	2851.96	3454.62	3216.09	2851.44	3007.13	770.314	813.562	808.54	569.47	564.535	560.021	4718.66	7262.3	5830.06	6616.36	6285	6623.65		3041.49	-1.08342	0.471908	0.129413	-8.37179	5.67476e-17	4.7971e-15		3041.49	-0.0565546	0.961558	0.12884	-0.438951	0.660697	0.740252		3041.49	-0.497938	0.708118	0.135157	-3.68414	0.000229476	0.0025635
C05C12.3	gtl-1	246.451	342.066	621.375	324	377.994	325.402	672.814	680.396	636.965	152.957	125.584	172.314	637.677	724.102	679.132	752.372	519.188	637.156	691.095	431.905	513.433	156.6	190.134	143.836		448.123	-0.237579	0.848167	0.236377	-1.00509	0.314855	0.396312		448.123	-2.14231	0.226517	0.241622	-8.86638	7.55616e-19	1.02372e-17		448.123	-0.0967997	0.935105	0.234317	-0.413114	0.679523	0.806885
C05C8.1	C05C8.1	842.278	620.268	326.997	511.287	417.66	405.158	126.279	156.858	129.827	119.966	169.393	160.498	144.88	126.297	124.232	122.594	159.18	115.174	115.728	161.358	146.53	160.159	131.451	142.638		234.862	-0.422579	0.746089	0.233575	-1.80918	0.0704224	0.110196		234.862	0.123846	1.08964	0.248954	0.497464	0.618862	0.707338		234.862	0.0071731	1.00498	0.25088	0.0285917	0.97719	0.992157
C05C8.3	fkb-3	5018.73	3481.9	2226.19	6985.75	5954.58	5939.39	1942.67	2020.82	1928.14	1421.6	1605.34	1408.05	1633.47	1605.02	1416.24	1594.71	1590.88	1717.04	3186.9	2676.35	2920.22	2332.4	2699.44	2200.69		2729.44	0.815898	1.76039	0.181703	4.49027	7.11323e-06	3.12923e-05		2729.44	-0.409714	0.752772	0.183248	-2.23585	0.0253619	0.0496954		2729.44	0.0747938	1.05321	0.183419	0.407776	0.683438	0.810422
C05C8.7	C05C8.7	2646.76	2800.39	3101.98	3911.7	3789.28	3838.63	4323.79	4864.63	3970.89	4487.73	4618.39	4501.83	4187.24	4684.56	4005.43	5112.37	4213.66	6629.38	2249.06	1784.64	2054.89	2655.09	2602.02	2405.66		3726.67	0.432606	1.34967	0.131865	3.28068	0.00103556	0.00269542		3726.67	0.0483735	1.0341	0.131695	0.367315	0.713384	0.78408		3726.67	0.309023	1.23887	0.131639	2.3475	0.0189001	0.0692909
C05C9.1	C05C9.1	86.8718	103.232	107.64	167.531	135.331	126.811	105.064	117.134	99.399	28.9918	31.1527	23.6316	166.306	162.081	154.254	183.891	192.497	204.989	120.096	75.2193	84.2261	24.9137	41.0784	21.5754		106.83	0.526342	1.44027	0.172055	3.05916	0.00221962	0.00532981		106.83	-1.9403	0.260563	0.22521	-8.61551	6.96309e-18	8.79018e-17		106.83	0.267916	1.20407	0.166361	1.61044	0.107301	0.237287
C05C9.2	C05C9.2	17.9409	19.2467	8.15453	24.4975	17.8886	27.9144	7.07162	3.05567	2.02855	5.9983	2.92056	6.89256	10.2028	4.20989	4.14105	7.9093	8.32921	7.3965	5.45889	2.42643	0	3.5591	3.52101	1.19863		8.41512	0.641004	1.55941	0.42814	1.49718	0.134345	0.192896		8.41512	0.375517	1.2973	0.650337	0.577419	0.563656	0.658931		8.41512	0.346775	1.27171	0.567618	0.61093	0.541246	0.702646
C05D10.2	mapk-15	357.874	363.062	427.297	522.351	530.436	511.233	262.66	302.511	242.412	158.955	144.081	178.222	3553.65	4002.56	3627.56	3696.61	3704.65	4113.51	153.941	107.976	103.84	104.4	100.936	117.466		1141.17	0.444511	1.36085	0.118654	3.74626	0.000179489	0.000561252		1141.17	-0.746916	0.595876	0.135349	-5.51843	3.42043e-08	1.74753e-07		1141.17	0.0420048	1.02954	0.108684	0.386485	0.699137	0.821297
C05D10.3	wht-1	419.251	479.417	301.718	328.741	297.884	291.905	538.453	590.763	520.324	404.885	354.362	371.214	236.706	209.442	195.665	185.869	199.901	180.686	325.35	490.139	482.281	542.169	523.456	501.029		373.817	-0.384864	0.765851	0.157038	-2.45078	0.0142549	0.0273445		373.817	-0.545258	0.685269	0.156353	-3.48736	0.00048781	0.00140456		373.817	-0.179587	0.882956	0.168356	-1.06671	0.286103	0.464439
C05D10.4	C05D10.4	851.721	957.96	1313.7	1322.87	1476.2	1428.42	1212.28	1353.66	1217.13	621.824	682.439	646.916	1075.38	1217.71	1065.29	1045.02	931.946	1300.73	2389.9	1705.78	1970.66	1198.23	1188.93	1222.61		1224.89	0.435904	1.35276	0.149529	2.91518	0.00355486	0.00803788		1224.89	-0.955147	0.515789	0.151644	-6.29863	3.00283e-10	1.90808e-09		1224.89	-0.0356294	0.975606	0.150523	-0.236704	0.812886	0.896351
C05D11.1	C05D11.1	1600.52	1888.8	1650.48	1212.23	1210.98	1211.49	1458.77	1333.29	1459.54	2394.32	2607.09	2457.69	2482.35	2622.76	2871.82	2146.39	2094.33	2268.61	2574.41	2853.48	2491.02	7788.49	8140.57	7722.8		2772.59	-0.500011	0.707102	0.0824811	-6.06212	1.34338e-09	1.61705e-08		2772.59	0.811014	1.75444	0.0822668	9.85834	6.30828e-23	1.1288e-21		2772.59	-0.293541	0.815897	0.0811361	-3.61788	0.000297026	0.00312993
C05D11.12	let-721	3634.45	3837.09	3255.29	3533.97	3279.84	3321.82	4070.22	4114.97	4032.76	3103.12	3062.7	3070.14	5495.25	5481.28	5485.86	3515.68	3590.82	3206.91	3582.12	3996.33	3842.1	4994.6	5510.38	5113.38		4005.46	-0.0815582	0.945036	0.0709188	-1.15002	0.250135	0.326792		4005.46	-0.403674	0.755931	0.0713594	-5.65691	1.54123e-08	8.19433e-08		4005.46	-0.674373	0.626605	0.0709078	-9.51056	1.89647e-21	7.27843e-19
C05D11.3	txdc-9	4338.87	3026.1	1692.88	2384.16	1986.41	1879.84	899.105	891.237	957.477	635.82	661.995	588.822	1758.97	1628.18	1747.52	1427.63	1798.18	1455	900.717	934.176	843.415	513.697	561.014	511.817		1417.63	-0.534911	0.690201	0.202476	-2.64185	0.00824542	0.0168835		1417.63	-0.542461	0.686599	0.205884	-2.63479	0.00841891	0.018781		1417.63	-0.133378	0.911694	0.203451	-0.655578	0.512096	0.679193
C05D11.4	let-756	394.7	447.923	561.847	554.75	678.212	686.695	1286.02	1437.18	1312.47	1029.71	953.078	1140.23	1013.14	1170.35	1028.02	1145.86	788.499	1375.75	1964.11	1760.37	1971.81	1698.88	1546.9	1450.35		1141.54	0.449644	1.3657	0.163965	2.74232	0.00610064	0.0128891		1141.54	-0.369883	0.773845	0.160965	-2.29791	0.0215671	0.0429812		1141.54	0.0428732	1.03016	0.161319	0.265766	0.79042	0.882115
C05D11.5	C05D11.5	135.973	90.9843	86.438	231.541	185.886	200.984	96.9822	79.4474	95.3419	89.9745	110.008	93.5419	56.1156	66.3058	54.8689	65.2517	97.1741	87.7014	32.7533	55.8079	74.9959	92.5366	103.283	109.076		99.7072	0.984949	1.97924	0.203557	4.83869	1.30695e-06	6.89044e-06		99.7072	0.11134	1.08023	0.218389	0.509825	0.610174	0.699198		99.7072	0.498281	1.41253	0.23093	2.15772	0.0309496	0.0979957
C05D11.6	nas-4	9.44258	20.1215	23.6481	18.9658	25.6663	23.1291	30.3069	17.3155	27.3855	21.9938	15.5763	24.6163	11.2231	17.8921	15.5289	16.8073	16.6584	17.9629	2.18356	3.63964	4.61513	36.7774	35.2101	32.3631		19.5429	0.332379	1.25909	0.322701	1.02999	0.303014	0.384007		19.5429	-0.272073	0.828129	0.327418	-0.830964	0.405994	0.512362		19.5429	0.20482	1.15254	0.366688	0.558566	0.576458	0.729519
C05D11.7	atgl-1	2282.27	2628.92	2853.27	1838.9	1831.64	1823.21	3223.65	3087.25	3111.8	4111.84	3675.04	4039.04	3918.91	3852.05	3878.09	3250.72	3270.6	3213.25	2337.5	2960.24	2450.63	2824.74	2549.21	3016.96		3001.24	-0.499504	0.70735	0.0951966	-5.24708	1.54526e-07	1.03654e-06		3001.24	0.327711	1.25502	0.0944772	3.46868	0.00052303	0.00149688		3001.24	-0.259002	0.835666	0.094473	-2.74154	0.00611516	0.0308262
C05D11.8	C05D11.8	1019.8	1361.26	1671.68	1141.11	1152.65	1064.74	1154.69	1242.64	1224.23	1224.65	1269.47	1353.9	2073.22	2123.89	2127.47	1663.92	1685.28	1561.72	752.235	956.013	853.799	805.543	840.347	885.791		1300.42	-0.271995	0.828173	0.128075	-2.12371	0.0336942	0.057887		1300.42	0.0875319	1.06255	0.128764	0.679784	0.496641	0.598573		1300.42	-0.364844	0.776553	0.127376	-2.86432	0.00417905	0.0231739
C05D12.1	C05D12.1	129.363	148.724	169.614	243.395	244.219	279.942	214.169	209.823	166.341	367.896	345.6	297.365	48.9736	41.0465	39.34	55.3651	47.1989	56.0021	299.147	219.592	249.217	294.219	262.902	260.104		195.398	0.774378	1.71045	0.149224	5.18938	2.10993e-07	1.36367e-06		195.398	0.775865	1.71222	0.147197	5.27092	1.35742e-07	6.42064e-07		195.398	0.289503	1.22222	0.213827	1.35391	0.175764	0.336838
C05D2.1	daf-4	1213.37	1427.75	1807.04	1533.07	1580.42	1483.45	1123.38	1231.43	1015.29	813.77	753.506	811.353	2018.12	2027.06	2169.91	1742.02	1748.21	1872.37	1765.4	1435.23	1595.68	1462.79	1340.33	1415.59		1474.44	0.0466564	1.03287	0.117806	0.396046	0.692071	0.752128		1474.44	-0.502699	0.705785	0.120829	-4.1604	3.1769e-05	0.000110972		1474.44	-0.212967	0.862761	0.117651	-1.81015	0.0702718	0.176292
C05D2.10	wdr-37	2567.44	2473.2	1944.86	1818.35	1644.2	1769.77	2107.34	2182.77	2185.76	2549.28	2700.55	2625.08	1399.83	1482.94	1572.56	1418.73	1502.03	1232.05	1551.42	1806.48	1674.14	2231.55	2280.44	2257.03		1957.41	-0.416456	0.749263	0.100195	-4.15648	3.23191e-05	0.000121119		1957.41	0.282212	1.21606	0.100251	2.81507	0.00487669	0.011487		1957.41	-0.100816	0.932505	0.102194	-0.986521	0.323877	0.503564
C05D2.4	bas-1	224.733	227.461	243.82	242.605	277.662	286.322	302.059	332.049	335.725	136.961	147.002	150.652	218.341	211.547	217.405	253.098	211.932	197.592	510.952	344.553	387.671	125.755	126.756	158.22		244.62	0.211968	1.15827	0.140276	1.51107	0.13077	0.188344		244.62	-1.15777	0.448203	0.148048	-7.82025	5.27181e-15	5.21476e-14		244.62	0.0343219	1.02408	0.146485	0.234303	0.814749	0.897455
C05D2.6	madf-11	1519.31	1610.6	1519.19	975.95	929.43	922.771	1569.9	1664.32	1655.3	1322.63	1369.74	1358.82	1750.81	1823.94	1957.68	1920.97	1695.46	1628.29	1474.99	2078.24	1831.05	1511.43	1580.93	1470.72		1547.6	-0.717101	0.608319	0.101526	-7.06322	1.62685e-12	4.76461e-11		1547.6	-0.271315	0.828564	0.101353	-2.67692	0.00743029	0.0167779		1547.6	-0.0769246	0.948076	0.100582	-0.764793	0.444395	0.621386
C05D2.8	C05D2.8	130.308	124.229	92.9617	125.649	112.776	106.872	569.77	614.19	591.323	1231.65	1356.12	1280.05	306.085	335.739	340.601	398.431	462.734	460.696	298.055	150.439	222.68	358.283	343.885	330.823		431.014	-0.00535832	0.996293	0.176121	-0.030424	0.975729	0.982997		431.014	1.12351	2.17877	0.150727	7.45399	9.05617e-14	7.99874e-13		431.014	0.428272	1.34562	0.157329	2.72215	0.0064859	0.0321081
C05D9.3	C05D9.3	1163.33	1275.53	1275.37	1363.96	1400.76	1383.76	1713.35	1814.05	1817.58	871.753	885.905	889.141	1798.76	1902.87	1578.78	1605.59	1559.41	1941.05	1251.18	1245.97	1358	1183.99	1286.34	1184.25		1406.28	0.15914	1.11662	0.090387	1.76065	0.078297	0.121142		1406.28	-1.01391	0.495203	0.0919388	-11.0281	2.7982e-28	6.93788e-27		1406.28	-0.0491093	0.966533	0.0899697	-0.545842	0.585174	0.735452
C05D9.5	ife-4	2424.86	1684.08	1114.72	2172.38	1799.75	1799.28	1021.34	1047.08	1087.3	589.833	657.127	601.622	1400.85	1329.27	1084.96	1265.49	1622.35	1255.29	918.185	907.485	1068.4	804.356	926.025	830.654		1225.53	0.144385	1.10526	0.187973	0.768118	0.442417	0.525406		1225.53	-0.771509	0.585804	0.190994	-4.03945	5.35771e-05	0.000181145		1225.53	0.119229	1.08615	0.189109	0.630478	0.528382	0.69325
C05D9.7	C05D9.7	2033.93	1762.82	1220.73	1501.46	1474.64	1378.97	2234.63	2181.75	2142.15	1540.56	1565.42	1639.45	1866.1	1733.42	1427.63	1444.44	1868.52	1390.54	780.621	1099.17	1056.87	815.034	951.846	816.27		1496.96	-0.203792	0.868266	0.163321	-1.2478	0.212104	0.284706		1496.96	-0.46683	0.723553	0.163361	-2.85766	0.00426776	0.0101886		1496.96	-0.0957088	0.935812	0.163705	-0.584641	0.558789	0.714864
C05D9.9	C05D9.9	10.3868	11.373	13.0473	22.1268	24.1107	23.1291	1.01023	7.1299	7.09993	1.99943	0	1.9693	7.14198	9.47226	8.2821	18.7846	22.2112	16.9063	13.1013	10.9189	5.76891	18.9819	15.2577	13.185		11.8081	0.989685	1.98575	0.359294	2.75453	0.00587769	0.0124748		11.8081	-1.94792	0.25919	0.843881	-2.30828	0.0209834	0.041928		11.8081	1.22428	2.33639	0.418751	2.92365	0.00345957	0.0202954
C05E11.1	lnp-1	1730.83	1541.48	1117.17	1146.64	1073.32	991.36	1422.4	1485.06	1454.47	1549.56	1549.85	1506.52	928.458	909.337	775.412	711.837	909.735	784.029	954.214	1424.31	1437.61	1066.54	1123.2	1085.96		1194.97	-0.450346	0.731867	0.15311	-2.94132	0.00326813	0.00748168		1194.97	0.0785263	1.05594	0.153116	0.512854	0.608054	0.697084		1194.97	-0.119087	0.92077	0.155553	-0.765571	0.443932	0.620857
C05E11.3	C05E11.3	1450.38	1259.78	1054.38	1687.96	1690.86	1571.18	1981.06	2001.46	1809.47	1132.68	1230.53	1205.21	1084.56	998.798	949.336	1223.96	1242.9	1143.29	936.745	798.295	858.414	450.819	566.882	490.242		1200.8	0.395882	1.31575	0.108582	3.64593	0.000266426	0.000801432		1200.8	-0.69872	0.616118	0.109144	-6.40184	1.53518e-10	1.00064e-09		1200.8	0.251641	1.19056	0.1107	2.27319	0.0230148	0.0791997
C05E11.7	C05E11.7	100.091	108.481	114.163	132.761	136.887	141.965	129.31	123.245	113.599	44.9873	40.8879	36.4321	102.028	93.6702	89.0326	121.605	105.503	118.344	110.27	74.0061	111.917	65.2501	73.9411	69.5208		98.2458	0.348626	1.27335	0.147179	2.36872	0.0178496	0.0333005		98.2458	-1.58253	0.333896	0.185954	-8.51034	1.73422e-17	2.12905e-16		98.2458	0.276771	1.21148	0.159891	1.731	0.0834517	0.198671
C05E11.8	flp-12	140.694	129.478	72.5753	157.258	141.553	204.174	56.5729	59.0763	65.9279	417.882	380.647	366.291	51.0142	24.2069	48.6574	44.4898	52.7517	82.4181	49.13	30.3304	27.6908	149.482	159.619	160.617		128.022	0.55673	1.47093	0.243802	2.28354	0.0223988	0.0406401		128.022	2.68143	6.41492	0.253421	10.5809	3.65248e-26	8.03228e-25		128.022	0.529373	1.4433	0.282339	1.87495	0.0607991	0.159363
C05E4.3	srp-1	175.632	141.726	147.597	268.683	310.329	306.261	117.187	136.487	104.47	61.9825	73.0141	55.1405	83.6632	86.3028	63.151	77.1157	70.3356	62.3419	86.2504	75.2193	66.9194	61.691	66.8991	65.9249		115.18	0.931312	1.90701	0.144653	6.43827	1.20844e-10	2.0066e-09		115.18	-0.912773	0.531163	0.178386	-5.11685	3.10688e-07	1.39727e-06		115.18	-0.14985	0.901344	0.184885	-0.810501	0.417652	0.596459
C05E4.4	sri-4	0	0	0	0	0	0	50.5115	48.8907	50.7138	11.9966	11.6823	13.7851	9.18255	21.0495	16.5642	40.5352	31.4659	41.2091	25.1109	27.9039	21.9219	9.49093	10.563	11.9863		18.9401	0	1	1.67727	0	1	1		18.9401	-2.00258	0.249553	0.326988	-6.12432	9.10699e-10	5.55871e-09		18.9401	1.27452	2.41919	0.320181	3.98063	6.87318e-05	0.00100439
C05E4.9	icl-1	10846.7	12583	18138.1	17722	16494.1	18805.5	14799.9	16425.2	15388.6	22006.8	21280.2	22065.1	17381.5	19570.7	18754.8	25483.8	18092.9	21644.3	14651.7	14069.7	14027.7	18597.5	19752.8	19344.8		17830.3	0.351034	1.27547	0.142961	2.45545	0.0140707	0.027033		17830.3	0.487478	1.40199	0.142967	3.40972	0.000650296	0.00182261		17830.3	0.227461	1.17077	0.142945	1.59125	0.111553	0.243353
C05E7.1	C05E7.1	823.393	649.138	605.882	1160.87	1121.54	1311.18	573.811	557.15	554.809	1414.6	1583.92	1325.34	751.949	569.388	571.465	882.875	925.468	1016.49	839.577	515.616	593.044	758.088	906.072	829.455		868.38	0.790693	1.7299	0.157349	5.02507	5.0324e-07	2.92469e-06		868.38	1.35893	2.56495	0.158586	8.56907	1.04324e-17	1.30397e-16		868.38	0.577271	1.49202	0.159032	3.62991	0.000283523	0.00300939
C05E7.2	C05E7.2	378.648	311.446	434.637	297.922	325.106	352.519	150.524	148.709	162.284	1063.7	1201.33	1113.64	292.821	177.868	224.652	407.329	409.982	515.642	506.585	281.466	293.061	383.196	381.442	407.536		425.918	-0.205753	0.867086	0.192944	-1.06639	0.286249	0.366444		425.918	2.87202	7.32087	0.197744	14.5239	8.55075e-48	4.87778e-46		425.918	0.937622	1.91537	0.196385	4.7744	1.80243e-06	5.71449e-05
C05E7.4	frpr-2	2.83277	9.62334	4.89272	3.16097	4.6666	1.59511	2.02046	5.09278	0	14.9958	10.7087	8.86187	4.08113	3.15742	3.10579	3.95465	0.925468	0	6.55067	2.42643	9.23026	14.2364	18.7787	8.39044		5.97035	-0.884012	0.541859	0.673372	-1.31281	0.189246	0.258596		5.97035	2.28175	4.86269	0.729207	3.12909	0.00175348	0.00451821		5.97035	-1.07101	0.475985	0.894728	-1.19702	0.231297	NA
C05G5.2	C05G5.2	789.4	770.742	839.917	533.414	556.88	492.091	964.77	981.889	978.776	911.742	909.269	951.174	593.805	606.225	548.689	478.513	409.982	664.628	1100.51	1480.12	1580.68	1248.06	1299.25	1311.31		875.077	-0.60106	0.659269	0.140792	-4.26914	1.96225e-05	7.68359e-05		875.077	-0.0776246	0.947617	0.139592	-0.556083	0.578154	0.670413		875.077	-0.173127	0.886918	0.143476	-1.20666	0.227564	0.399014
C05G5.3	C05G5.3	632.653	463.67	352.276	886.653	689.101	677.921	315.192	307.604	323.554	302.914	420.561	370.229	442.803	435.724	345.778	576.39	547.877	581.154	245.65	161.358	193.836	153.041	190.134	143.836		406.663	0.639089	1.55735	0.186249	3.43137	0.00060055	0.00165401		406.663	0.208985	1.15587	0.191846	1.08934	0.276004	0.376491		406.663	0.478032	1.39284	0.188858	2.53117	0.0113682	0.0475055
C05G5.5	C05G5.5	300.274	322.819	315.58	277.375	291.662	293.5	697.059	682.433	619.723	379.892	404.011	398.784	271.395	224.177	227.758	247.166	231.367	238.801	208.53	169.85	224.988	340.487	328.627	299.659		333.163	-0.122655	0.918496	0.105109	-1.16694	0.243237	0.3189		333.163	-0.757242	0.591626	0.0999611	-7.57537	3.58094e-14	3.27727e-13		333.163	-0.0130961	0.990964	0.114242	-0.114635	0.908735	0.951535
C05G6.1	nhr-76	117.088	136.476	132.919	149.356	153.22	138.775	20.2046	22.4082	49.6995	75.9785	64.2524	81.7261	113.251	129.454	145.972	150.277	163.808	135.25	82.9751	65.5136	64.6118	176.769	171.356	170.206		112.981	0.190154	1.14089	0.162371	1.1711	0.241557	0.317201		112.981	1.2653	2.40377	0.223713	5.65589	1.5504e-08	8.23157e-08		112.981	0.211602	1.15797	0.167489	1.26338	0.206452	0.374676
C05H8.1	ckk-1	244.563	288.7	380.817	391.17	423.882	406.753	283.875	315.753	233.283	337.904	321.262	358.413	386.687	408.36	368.554	483.456	441.448	388.845	177.96	124.961	144.223	228.969	196.003	228.939		315.199	0.415992	1.33422	0.15072	2.76003	0.00577955	0.0123122		315.199	0.288912	1.22172	0.154694	1.86764	0.0618128	0.108258		315.199	0.17571	1.12952	0.150995	1.16368	0.244554	0.419888
C06A1.2	txt-13	341.822	297.449	244.636	493.112	362.439	544.73	318.223	273.992	320.511	248.93	295.951	249.117	192.834	133.664	152.184	203.664	225.814	171.176	255.476	197.754	212.296	156.6	186.613	186.987		261.082	0.665158	1.58574	0.170061	3.9113	9.17995e-05	0.000308027		261.082	-0.200911	0.870001	0.174861	-1.14898	0.250566	0.348241		261.082	0.328589	1.25578	0.18332	1.79243	0.0730639	0.180665
C06A1.5	rpb-6	4093.36	2838.01	1727.95	2177.12	2046.3	1881.43	1737.6	1654.14	1778.03	1214.66	1388.24	1245.58	1634.49	1461.89	1571.53	1407.86	1663.99	2270.73	770.795	902.632	906.873	522.001	564.535	584.934		1585.19	-0.503999	0.70515	0.204518	-2.46432	0.0137272	0.0264963		1585.19	-0.425788	0.744432	0.205644	-2.07051	0.0384042	0.071608		1585.19	0.194537	1.14436	0.205415	0.94704	0.343618	0.5231
C06A12.3	C06A12.3	76.4849	55.9903	56.2663	101.151	101.887	97.3017	47.4808	57.0392	39.5568	75.9785	91.511	98.4652	41.8316	27.3643	25.8816	35.5918	52.7517	41.2091	55.6807	47.3154	41.5362	74.7411	98.5882	88.699		63.7627	0.675566	1.59722	0.194867	3.4668	0.000526697	0.00146965		63.7627	0.885061	1.84684	0.212543	4.16415	3.12508e-05	0.000109263		63.7627	0.449098	1.36519	0.247539	1.81425	0.0696394	0.17547
C06A12.5	lact-6	8.49832	8.74849	3.26181	6.32194	10.8887	14.356	14.1432	12.2227	11.157	21.9938	23.3645	19.693	10.2028	10.5247	6.21158	4.94331	8.32921	12.6797	0	0	0	53.3865	48.1204	47.9454		14.8747	0.642121	1.56062	0.441813	1.45338	0.146119	0.207241		14.8747	0.793776	1.73361	0.37524	2.11538	0.0343974	0.0649995		14.8747	-0.0654879	0.955622	0.461477	-0.141909	0.887152	0.939131
C06A5.1	ints-1	1080.23	1720.83	2277.56	900.877	894.431	693.873	1844.68	1778.4	1955.52	1931.45	1696.85	1988.01	1418.19	1437.68	1798.25	956.036	880.12	1035.51	1095.05	1765.23	1270.31	733.174	686.596	791.099		1359.58	-1.02917	0.489992	0.201468	-5.10834	3.25003e-07	1.99645e-06		1359.58	0.00970391	1.00675	0.200784	0.04833	0.961453	0.977492		1359.58	-0.696802	0.616938	0.20187	-3.45174	0.00055699	0.00497132
C06A5.11	sir-2.4	711.027	613.269	321.289	524.721	449.549	409.146	370.755	358.532	372.239	294.917	263.824	278.656	188.752	181.025	163.572	134.458	181.392	161.666	197.612	183.195	230.757	142.364	190.134	148.631		294.645	-0.248981	0.84149	0.200952	-1.23901	0.215343	0.287808		294.645	-0.395607	0.76017	0.206037	-1.92007	0.0548486	0.0977994		294.645	-0.158875	0.895723	0.215496	-0.737252	0.460969	0.635466
C06A5.2	C06A5.2	14.1639	9.62334	8.15453	4.74146	5.44436	5.58288	0	0	0	0	0	0	1.02028	3.15742	1.03526	0.988662	0.925468	1.05664	0	0	0	0	1.17367	0		2.37783	-1.01245	0.495702	0.66086	-1.53203	0.125516	NA		2.37783	0	1	1.74653	0	1	1		2.37783	-0.807743	0.571275	1.17672	-0.686436	0.492438	NA
C06A5.3	C06A5.3	1996.16	2191.5	1822.54	1717.99	1739.86	1620.63	3347.9	3337.81	3419.12	2911.18	2905.96	2973.65	2306.86	2434.37	2305.53	2127.6	2059.17	2003.39	850.495	946.308	979.562	1127.05	1266.39	1216.61		2066.99	-0.24266	0.845186	0.074745	-3.2465	0.00116832	0.00299385		2066.99	-0.200982	0.869958	0.0734981	-2.73453	0.00624703	0.0143408		2066.99	-0.186833	0.878532	0.0748226	-2.49701	0.0125247	0.0508802
C06A5.7	unc-94	2265.28	2573.81	2774.99	2470.3	2542.52	2511.5	4198.52	4346.18	4227.5	5456.46	5349.5	5507.16	2197.69	2383.85	2239.27	2385.64	1937.93	2641.61	3249.13	3423.69	3125.6	4367.01	4342.58	4192.82		3362.94	-0.0174836	0.987954	0.0945292	-0.184955	0.853265	0.886161		3362.94	0.353024	1.27724	0.0936419	3.76994	0.000163288	0.00051045		3362.94	0.0296305	1.02075	0.0953406	0.310786	0.755963	0.859972
C06A6.2	C06A6.2	1690.22	1821.44	2060.65	1532.28	1464.53	1340.69	4062.14	3840.98	3855.26	3436.03	3574.77	3486.65	1737.54	1884.98	2056.03	1440.48	1430.77	1321.86	2963.08	4336.03	3898.63	2433.24	2523.39	2281		2519.7	-0.361726	0.778233	0.116318	-3.1098	0.00187216	0.00457524		2519.7	-0.163646	0.892766	0.114886	-1.42442	0.154324	0.233146		2519.7	-0.437293	0.738519	0.117025	-3.73675	0.000186412	0.00215764
C06A6.3	mvb-12	2098.14	1808.31	1325.11	1337.09	1179.09	1060.75	1427.46	1265.05	1469.69	1867.47	1877.92	1810.77	1516.14	1359.8	1355.16	1158.71	1379.87	1213.03	1352.71	2094.01	1707.6	997.734	974.145	973.291		1442.04	-0.548043	0.683947	0.153763	-3.56421	0.000364957	0.00106593		1442.04	0.416738	1.33491	0.153985	2.70636	0.00680254	0.0155174		1442.04	-0.173364	0.886772	0.154576	-1.12155	0.262054	0.437877
C06A6.5	erp-44.2	2428.63	2194.12	1602.37	2897.03	2817.85	2703.71	3976.27	4164.88	3880.62	4075.85	4567.76	4023.29	2498.67	2555.41	2296.21	2409.37	1934.23	2253.82	3138.86	3616.59	3770.56	5327.97	5539.72	5858.93		3355.53	0.436009	1.35286	0.124023	3.51554	0.000438864	0.00125614		3355.53	0.0754313	1.05368	0.123413	0.61121	0.541061	0.639811		3355.53	-0.156075	0.897463	0.124495	-1.25367	0.209963	0.37835
C06A8.2	snpc-1.1	2189.74	1899.3	1338.97	1088.95	1070.21	1016.88	992.047	969.666	1058.9	1231.65	1076.71	1183.55	795.821	745.151	830.281	614.948	622.84	572.7	603.753	871.088	738.421	709.447	701.854	607.708		980.442	-0.772646	0.585343	0.144852	-5.33406	9.60418e-08	6.85657e-07		980.442	0.209127	1.15599	0.146339	1.42906	0.152986	0.231499		980.442	-0.389042	0.763636	0.148915	-2.61252	0.00898784	0.0400118
C06A8.5	spdl-1	2774.23	2670.91	2377.05	1525.96	1666.75	1485.05	1764.87	1842.57	1711.08	1934.45	1935.36	1900.38	1954.86	1957.6	1622.26	1563.08	1443.73	1312.35	1196.59	1738.54	1921.05	2137.83	2280.44	1932.2		1860.38	-0.741586	0.598081	0.133518	-5.55423	2.78846e-08	2.26456e-07		1860.38	0.117596	1.08493	0.134146	0.876632	0.380686	0.48813		1860.38	-0.357601	0.780461	0.13457	-2.65736	0.00787552	0.0366018
C06A8.9	glr-4	105.757	115.48	185.108	138.293	172.664	147.548	151.535	135.468	116.642	176.95	190.81	196.93	137.738	144.189	162.536	181.914	123.087	145.817	164.858	118.895	115.378	167.278	143.188	176.199		150.594	0.169827	1.12492	0.196158	0.865767	0.386618	0.469734		150.594	0.484416	1.39902	0.198199	2.44409	0.014522	0.0304612		150.594	0.0194657	1.01358	0.199606	0.0975203	0.922313	0.960375
C06B3.7	C06B3.7	4.72129	1.7497	1.63091	3.95121	5.44436	6.38044	54.5525	40.7423	52.7424	239.932	247.274	219.577	29.5882	9.47226	21.7405	53.3878	65.7082	52.8321	1.09178	1.21321	5.76891	30.8455	24.647	32.3631		50.3066	0.999242	1.99895	0.604294	1.65357	0.0982149	0.147065		50.3066	2.25506	4.77355	0.217608	10.3629	3.65547e-25	7.516e-24		50.3066	1.49758	2.82369	0.278336	5.38049	7.42829e-08	3.54967e-06
C06B8.7	C06B8.7	1075.51	1875.68	3489.32	1854.7	1935.86	1662.1	4987.51	5361.68	5078.48	4293.78	3667.26	4177.88	4835.12	5089.76	4347.07	4124.7	3011.47	3788.06	1832	1936.29	2180.65	2255.28	2130.21	2125.18		3213.15	-0.240593	0.846398	0.239821	-1.00322	0.315756	0.397245		3213.15	-0.345886	0.786825	0.239239	-1.44577	0.148241	0.2256		3213.15	-0.385692	0.765412	0.23931	-1.61168	0.107031	0.236865
C06B8.8	rpl-38	20801.1	16392.9	8452.17	25392.1	21374.6	28004.5	4178.31	4615.08	4702.18	3608.98	4385.71	4278.31	4512.71	3912.04	3261.08	3905.22	3593.59	4316.39	4281.95	3354.54	3783.25	4058.56	4565.57	4143.68		8078.1	0.712039	1.63812	0.209764	3.39447	0.000687614	0.001873		8078.1	-0.136987	0.909416	0.210387	-0.651121	0.514968	0.615965		8078.1	0.0158274	1.01103	0.210471	0.0751997	0.940056	0.971636
C06E1.1	C06E1.1	6698.57	3797.72	2426.79	3819.24	3012.29	2849.66	4436.93	4354.33	4401.96	3646.97	3452.11	3231.63	16870.4	16798.5	12121.9	12098.3	13445.2	14610.2	1421.49	3278.11	2737.93	2423.75	2349.69	2104.8		6099.52	-0.416553	0.749213	0.267169	-1.55913	0.118965	0.173321		6099.52	-0.352861	0.78303	0.267259	-1.3203	0.186735	0.27328		6099.52	-0.189531	0.876891	0.266771	-0.710462	0.477418	0.648661
C06E1.10	rha-2	532.562	653.512	702.921	425.941	468.993	473.747	1154.69	1165.23	1110.63	976.724	833.334	1063.42	1152.92	1173.51	1147.07	1022.28	988.4	879.127	965.131	1102.81	1086.86	1541.09	1408.4	1667.3		987.359	-0.466272	0.723833	0.114369	-4.07693	4.56351e-05	0.000164556		987.359	-0.255738	0.837558	0.110655	-2.31113	0.0208258	0.041657		987.359	-0.264981	0.83221	0.110673	-2.39427	0.0166536	0.0629214
C06E1.3	doxa-1	140.694	189.842	326.997	173.063	220.108	236.076	393.99	349.365	393.539	456.871	419.588	459.832	389.748	393.625	437.916	424.136	416.461	517.755	224.906	149.225	156.914	153.041	138.493	164.213		305.267	-0.0670168	0.95461	0.214405	-0.312571	0.754606	0.80557		305.267	0.233081	1.17534	0.209719	1.1114	0.266398	0.365755		305.267	0.152954	1.11184	0.209458	0.730238	0.465245	0.63854
C06E1.4	glr-1	189.796	235.334	345.752	316.887	368.661	338.961	258.619	290.289	237.341	138.961	131.425	143.759	449.945	494.663	448.269	546.73	475.691	470.206	347.185	209.886	239.987	112.705	133.798	124.658		293.729	0.407474	1.32636	0.182562	2.23197	0.0256167	0.0455673		293.729	-0.924889	0.526721	0.192361	-4.8081	1.52373e-06	6.35195e-06		293.729	0.0998951	1.0717	0.179696	0.555912	0.578271	0.730553
C06E2.1	C06E2.1	134.085	123.354	103.563	258.409	228.663	236.874	5.05115	6.11134	7.09993	14.9958	16.5499	19.693	416.276	346.264	339.566	431.057	420.162	397.298	232.549	112.829	153.453	35.591	56.3361	49.144		172.707	1.00601	2.00835	0.19665	5.11575	3.12498e-07	1.9305e-06		172.707	1.48917	2.80727	0.432434	3.44368	0.000573848	0.00163002		172.707	0.179969	1.13286	0.186934	0.96274	0.335678	0.514885
C06E2.5	C06E2.5	2799.73	2215.99	1208.5	1646.87	1326.09	1268.11	1221.37	1219.21	1229.3	1071.7	1122.47	1059.49	1218.22	1012.48	944.16	851.238	1037.45	784.029	536.063	521.682	590.737	397.433	400.221	359.59		1085.09	-0.553058	0.681574	0.19719	-2.8047	0.0050364	0.0108912		1085.09	-0.173666	0.886587	0.198518	-0.874813	0.381676	0.488986		1085.09	-0.248083	0.842014	0.199131	-1.24583	0.212827	0.382062
C06E2.7	ubc-22	22.6622	16.6221	16.3091	25.2878	27.2218	27.9144	287.916	261.769	322.54	241.932	219.042	251.086	3.06085	4.20989	11.3879	15.8186	9.25468	11.6231	16.3767	10.9189	10.384	13.05	18.7787	17.9795		77.631	0.542148	1.45614	0.268881	2.01631	0.0437678	0.0726599		77.631	-0.29287	0.816277	0.155534	-1.883	0.0597009	0.105093		77.631	0.9713	1.96061	0.436751	2.22392	0.0261539	0.0866489
C06E4.7	glb-2	36.8261	24.4958	23.6481	51.3658	51.3326	58.2215	41.4195	52.9649	43.6139	25.9926	34.0733	17.7237	9.18255	9.47226	8.2821	8.89796	8.32921	12.6797	44.7629	18.1982	35.7673	32.0319	37.5574	40.7536		30.3164	0.92952	1.90464	0.271717	3.42091	0.000624111	0.00171193		30.3164	-0.825845	0.564152	0.2893	-2.85463	0.00430871	0.0102702		30.3164	0.140442	1.10224	0.437443	0.321052	0.748171	0.854283
C06E7.2	C06E7.2	239.842	224.836	225.065	343.756	349.217	291.107	403.082	469.555	415.853	564.84	636.683	539.589	18.3651	18.9445	15.5289	17.7959	24.0622	22.1895	290.413	191.688	205.373	310.828	301.633	276.885		266.547	0.513472	1.42748	0.141748	3.62242	0.000291861	0.00087255		266.547	0.434475	1.35142	0.136358	3.18628	0.00144115	0.00377164		266.547	0.280112	1.21429	0.297726	0.940837	0.346789	0.526172
C06E8.3	prk-1	220.012	234.459	241.374	156.468	199.886	175.462	318.223	311.678	338.768	344.902	310.553	364.321	322.41	328.372	497.961	329.225	384.995	276.84	544.797	839.545	556.123	288.287	239.428	285.275		337.89	-0.388161	0.764103	0.186972	-2.07604	0.0378906	0.0638578		337.89	0.0741022	1.05271	0.182868	0.405223	0.685313	0.761493		337.89	-0.21172	0.863507	0.182216	-1.16192	0.245269	0.420528
C06E8.5	C06E8.5	99.1471	119.854	228.327	51.3658	53.6659	59.019	19.1944	22.4082	25.3569	16.9952	17.5234	18.7084	85.7038	74.7256	127.337	65.2517	91.6213	77.1349	80.7915	52.1682	76.1497	124.568	95.0672	131.85		75.5806	-1.4509	0.365792	0.272299	-5.32836	9.91058e-08	7.0281e-07		75.5806	-0.330855	0.795065	0.360762	-0.9171	0.35909	0.465792		75.5806	-0.297231	0.813813	0.276321	-1.07567	0.282073	0.460358
C06G1.1	C06G1.1	933.871	985.955	1351.21	1405.05	1489.42	1632.59	1714.36	1806.92	1707.03	1444.59	1471.96	1350.94	2380.32	2320.7	2425.62	2972.91	2535.78	2937.47	3145.41	2193.49	2308.72	2021.57	2046.88	2289.39		1953.01	0.468045	1.38323	0.138034	3.3908	0.000696887	0.00189618		1953.01	-0.292945	0.816234	0.137902	-2.12429	0.0336456	0.0637217		1953.01	0.244948	1.18505	0.136671	1.79224	0.073094	0.180679
C06G1.2	cpg-19	445.69	475.918	706.182	569.765	660.323	771.235	2319.49	2371.2	2460.63	1269.64	1251.95	1263.31	2604.78	2721.7	2523.97	4000.13	2932.81	4761.23	3224.02	2553.82	2545.24	550.474	512.893	487.844		1832.68	0.296747	1.22837	0.171796	1.72732	0.0841096	0.129115		1832.68	-0.917958	0.529257	0.168551	-5.44617	5.14655e-08	2.58247e-07		1832.68	0.57476	1.48943	0.167401	3.43344	0.000595975	0.00522966
C06G1.4	ain-1	11640.8	13039.6	14391.1	12918.1	12587.4	12267.2	20248.1	22453.1	19286.5	14255	13148.4	14247.9	12570.9	13618	11408.6	10365.1	8561.5	10999.7	10249.6	10075.8	10842.1	10336.8	10975	10423.3		12954.6	-0.0488445	0.96671	0.100597	-0.485544	0.62729	0.698989		12954.6	-0.573622	0.671928	0.100563	-5.7041	1.16956e-08	6.31565e-08		12954.6	-0.329319	0.795912	0.100776	-3.26783	0.00108376	0.00841615
C06G3.1	nhr-105	462.687	405.93	417.512	494.692	462.771	480.925	706.151	737.435	821.564	538.847	551.987	543.528	496.878	551.496	514.526	572.435	652.455	524.095	233.64	137.093	147.684	226.596	221.823	240.926		464.32	0.162024	1.11886	0.129046	1.25555	0.209279	0.281371		464.32	-0.470847	0.721541	0.127587	-3.69039	0.000223913	0.000683359		464.32	0.163424	1.11994	0.129026	1.26659	0.205302	0.37338
C06G3.11	tin-9.1	1692.11	1283.4	525.967	1593.92	1158.09	1659.71	285.895	284.177	324.568	246.93	315.421	255.025	200.996	158.924	159.43	180.925	263.758	198.649	223.814	218.379	230.757	116.264	122.062	88.699		491.162	0.333883	1.2604	0.262339	1.27272	0.203119	0.274149		491.162	-0.130204	0.913702	0.269811	-0.482575	0.629398	0.715821		491.162	0.309484	1.23926	0.274372	1.12797	0.259332	0.435826
C06G4.5	npr-17	38.7146	40.243	48.9272	50.5755	69.2212	58.2215	25.2558	33.6124	14.1999	56.9839	55.4907	48.2479	126.515	109.457	131.478	118.639	134.193	127.854	119.004	81.2854	113.071	93.7229	97.4145	99.4867		78.8256	0.472865	1.38786	0.206754	2.28709	0.0221907	0.0403217		78.8256	1.13763	2.20019	0.246967	4.6064	4.09692e-06	1.61472e-05		78.8256	0.0512063	1.03613	0.174906	0.292764	0.769702	0.868834
C06G8.1	swt-3	428.693	390.183	307.426	277.375	346.884	295.893	571.791	584.651	569.009	572.838	474.105	556.328	484.635	387.31	345.778	392.499	470.138	502.962	354.828	422.199	459.206	141.178	123.235	118.665		399.075	-0.289888	0.817966	0.152649	-1.89905	0.0575584	0.0924588		399.075	-0.10608	0.929109	0.14966	-0.708807	0.478444	0.582938		399.075	0.16477	1.12099	0.15223	1.08237	0.279087	0.457224
C06G8.2	pept-2	122.754	174.095	251.16	179.385	230.219	246.444	132.34	153.802	156.198	377.893	381.62	444.078	164.266	157.871	163.572	226.404	198.976	166.95	307.881	188.048	173.067	355.91	393.179	411.132		239.885	0.256144	1.19428	0.216306	1.18417	0.236345	0.311401		239.885	1.44418	2.72108	0.217805	6.63062	3.34277e-11	2.28689e-10		239.885	0.287023	1.22012	0.22108	1.29827	0.194193	0.359587
C06G8.3	zipt-2.1	210.57	198.591	233.22	289.229	246.552	270.371	797.072	854.569	741.436	754.786	771.029	731.596	516.263	495.715	517.631	677.234	602.48	546.284	341.726	262.054	288.446	473.36	483.552	423.118		488.62	0.326061	1.25359	0.119096	2.73781	0.00618501	0.0130489		488.62	-0.0841556	0.943336	0.105357	-0.798765	0.424427	0.529975		488.62	0.256039	1.1942	0.10884	2.35244	0.0186505	0.0687229
C06H2.2	C06H2.2	838.501	674.508	517.813	659.853	610.546	516.018	746.561	746.602	797.221	967.726	915.11	848.77	818.267	838.822	866.515	872	887.524	662.515	493.484	577.49	501.896	537.424	612.655	601.715		712.897	-0.183543	0.880538	0.147491	-1.24444	0.213339	0.286137		712.897	0.25413	1.19262	0.146994	1.72884	0.0838377	0.13992		712.897	-0.0585462	0.960231	0.147102	-0.397996	0.690633	0.814409
C06H2.3	jmjd-5	874.383	689.381	340.044	552.38	537.436	562.276	384.898	346.309	349.925	313.911	368.965	296.38	499.939	567.283	606.664	604.073	701.505	553.681	133.197	179.556	162.683	208.8	201.871	185.788		425.889	-0.20335	0.868531	0.212453	-0.957154	0.338489	0.420722		425.889	-0.142715	0.905813	0.217325	-0.656689	0.511381	0.613027		425.889	0.151944	1.11107	0.213491	0.71171	0.476645	0.648329
C06H2.6	lmtr-3	2986.69	2113.63	1434.38	1724.31	1511.2	1421.24	1413.31	1248.75	1455.49	1186.66	1248.05	1160.9	1280.46	1196.66	1552.89	1210.12	1611.24	1144.34	1240.26	1652.4	1367.23	1446.18	1313.34	1434.77		1473.11	-0.488407	0.712812	0.19094	-2.55791	0.0105303	0.0209284		1473.11	-0.195542	0.873245	0.192118	-1.01782	0.308763	0.412354		1473.11	-0.0229078	0.984247	0.192043	-0.119285	0.90505	0.949449
C06H2.7	C06H2.7	829.059	734.873	577.341	286.858	235.663	196.198	1288.04	967.629	1386.52	1392.61	1204.25	1289.89	481.574	542.024	1009.38	380.635	578.417	301.143	301.331	491.352	316.136	55.7592	62.2045	63.5276		623.85	-1.57461	0.335734	0.261618	-6.01874	1.75782e-09	2.06905e-08		623.85	0.0937325	1.06713	0.25771	0.363714	0.716072	0.786331		623.85	-0.688937	0.620311	0.260771	-2.64193	0.0082436	0.0377827
C06H5.6	C06H5.6	227.566	258.08	253.606	282.117	305.662	307.059	483.901	492.981	422.953	189.946	200.545	243.209	166.306	164.186	156.325	192.789	149.926	132.08	248.925	200.18	233.064	109.146	134.972	137.843		237.224	0.27455	1.20962	0.133637	2.05445	0.039932	0.0669041		237.224	-1.14323	0.452746	0.135286	-8.45041	2.90277e-17	3.47371e-16		237.224	-0.0346761	0.976251	0.149389	-0.232119	0.816445	0.8977
C06H5.8	C06H5.8	44.3801	41.9927	40.7727	44.2536	31.1106	34.2948	67.6855	57.0392	51.7281	91.974	73.0141	88.6187	21.426	11.5772	20.7053	30.6485	27.764	19.0196	132.105	138.307	122.301	119.823	104.457	121.062		64.0025	-0.212132	0.863261	0.216393	-0.980309	0.326933	0.409096		64.0025	0.522442	1.43638	0.19378	2.69606	0.00701648	0.0159527		64.0025	0.532388	1.44632	0.289746	1.83743	0.0661459	0.169197
C07A12.1	ham-2	1006.58	1230.04	1234.6	1180.62	1221.09	1095.84	2241.7	2550.47	2249.66	966.726	849.884	934.435	1829.37	1971.28	1670.91	1319.86	1378.02	1315.52	1388.74	1609.94	1826.44	754.529	686.596	800.688		1388.06	0.0103531	1.0072	0.111218	0.0930882	0.925833	0.944497		1388.06	-1.35605	0.39065	0.111444	-12.168	4.60406e-34	1.46769e-32		1388.06	-0.446964	0.733585	0.110822	-4.03317	5.50289e-05	0.000837726
C07A12.2	C07A12.2	32.1048	33.2443	25.279	52.156	40.4438	40.6753	56.5729	43.7979	49.6995	256.927	265.771	261.917	125.495	108.405	105.597	172.027	169.361	177.516	77.5162	61.874	66.9194	503.019	478.857	539.386		156.023	0.562569	1.4769	0.204688	2.74842	0.00598828	0.0126806		156.023	2.38605	5.22723	0.161437	14.78	1.97135e-49	1.24638e-47		156.023	0.610751	1.52705	0.140353	4.35153	1.3519e-05	0.000284914
C07A12.3	nhr-35	799.787	747.996	876.612	813.95	734.211	782.401	1049.63	1011.43	972.691	1242.65	1296.73	1247.55	444.844	442.039	460.692	468.626	468.287	366.655	1036.1	1076.12	1056.87	1522.11	1384.93	1426.38		905.386	-0.0576383	0.960836	0.0883847	-0.652131	0.514317	0.596229		905.386	0.319954	1.24829	0.0871339	3.67198	0.000240675	0.000729524		905.386	-0.0454376	0.968996	0.097629	-0.465411	0.641637	0.776696
C07A12.4	pdi-2	60263.5	64689.8	56230.4	58238.5	57846.3	61019.3	100805	112490	101888	73906.1	69821.9	72945	68712	77861	66379	58085.9	62712.5	61018	60417.9	68614.6	76257	63321.1	70388.4	65419.1		70388.8	-0.0328503	0.977487	0.0897808	-0.365895	0.714444	0.771259		70388.8	-0.540672	0.68745	0.0897631	-6.02333	1.70865e-09	1.01041e-08		70388.8	-0.228041	0.853793	0.0897925	-2.53965	0.0110965	0.0465835
C07A12.7	C07A12.7	1740.27	1581.73	1816.83	1693.49	1799.75	1794.5	2251.8	2327.4	2161.42	2572.27	2426.02	2392.7	1558.99	1765	1658.49	1901.2	2028.63	2170.34	1871.31	1841.66	1879.51	2750	2639.58	2960.63		2065.98	0.0410524	1.02886	0.0762304	0.538531	0.59021	0.666497		2065.98	0.132853	1.09646	0.0757369	1.75414	0.0794074	0.133821		2065.98	0.291853	1.22421	0.0769144	3.79452	0.000147931	0.00180086
C07A4.1	rnp-9	106.701	113.73	166.352	154.097	159.442	191.413	84.8594	70.2804	78.0992	76.9782	54.5172	69.9103	190.793	197.865	180.136	195.755	210.081	304.313	211.805	134.667	147.684	99.6548	88.0252	104.281		141.31	0.380915	1.30217	0.20306	1.87588	0.0606723	0.096792		141.31	-0.212633	0.862961	0.229167	-0.927849	0.353486	0.460412		141.31	0.318365	1.24692	0.199921	1.59246	0.111282	0.242999
C07A4.2	C07A4.2	21.7179	24.4958	22.0172	27.6585	27.2218	27.9144	18.1842	24.4454	22.3141	11.9966	20.444	24.6163	5.10142	6.31484	7.24684	5.93197	13.882	2.11329	19.652	18.1982	18.4605	23.7273	29.3417	19.1782		18.4239	0.278729	1.21313	0.301029	0.925919	0.354488	0.437392		18.4239	-0.184526	0.879938	0.335408	-0.550155	0.582213	0.674183		18.4239	0.27451	1.20958	0.500841	0.548097	0.583625	0.734569
C07A9.1	clec-162	0	0.874849	0.815453	0.790243	0	0.797555	4.04092	0	3.04283	3.99887	1.94704	7.87722	193.854	179.973	183.242	251.12	214.709	217.668	2.18356	2.42643	4.61513	18.9819	36.3837	23.9727		56.3881	-0.149661	0.901463	1.45165	-0.103097	0.917886	0.938836		56.3881	0.959209	1.94424	0.68671	1.39682	0.162468	0.243221		56.3881	0.294889	1.22679	0.180102	1.63734	0.10156	0.228361
C07A9.11	ncx-7	94.4258	102.357	133.734	109.844	107.332	98.0992	58.5934	39.7237	50.7138	69.9802	80.8023	91.5726	136.718	179.973	178.065	163.129	147.149	153.213	34.9369	20.6247	48.4589	294.219	264.076	264.898		121.777	-0.0722947	0.951124	0.176929	-0.408608	0.682828	0.744148		121.777	0.701518	1.62621	0.207892	3.37444	0.000739667	0.00205412		121.777	-0.0939703	0.936941	0.171453	-0.548081	0.583636	0.734569
C07A9.2	bud-31	5665.55	3749.6	2220.48	2668.65	2408.74	2052.91	734.438	681.414	772.878	629.822	611.372	577.991	998.857	854.609	832.351	768.191	1093.9	691.044	699.829	1145.27	994.561	403.365	456.557	453.084		1340.23	-0.706329	0.612877	0.234363	-3.01382	0.00257977	0.00609392		1340.23	-0.266817	0.831151	0.237974	-1.12121	0.2622	0.36084		1340.23	-0.0726928	0.950862	0.236957	-0.306776	0.759014	0.861802
C07A9.3	tlk-1	8168.78	10308.3	11013.5	6460.24	6604.01	5653.86	16237.4	15474.9	16109.7	18573.7	17696.7	19184	8969.31	9197.57	9644.51	7211.3	5622.22	8076.98	5608.46	7479.47	7766.11	7408.86	7752.08	7480.68		10154.3	-0.655884	0.634687	0.135187	-4.85169	1.22411e-06	6.49465e-06		10154.3	0.213622	1.1596	0.134933	1.58317	0.113382	0.180402		10154.3	-0.411567	0.751806	0.135284	-3.04224	0.00234826	0.0149958
C07A9.4	ncx-6	114.255	119.854	107.64	50.5755	53.6659	43.8655	3.03069	3.05567	2.02855	1.99943	0.973522	1.9693	29.5882	28.4168	26.9168	25.7052	39.7951	49.6622	16.3767	15.7718	23.0757	24.9137	43.4258	50.3427		36.5377	-1.2054	0.43365	0.226892	-5.31264	1.08047e-07	7.62585e-07		36.5377	-0.719017	0.607511	0.843476	-0.852445	0.393967	0.500487		36.5377	0.435132	1.35203	0.279939	1.55438	0.120093	0.256284
C07B5.3	C07B5.3	14.1639	10.4982	5.70817	16.5951	17.1109	18.3438	19.1944	19.3526	20.2855	16.9952	10.7087	17.7237	31.6288	18.9445	26.9168	68.2177	62.9318	71.8517	186.694	154.078	148.838	266.932	206.566	242.124		69.6835	0.80223	1.74379	0.337329	2.37818	0.0173982	0.0325681		69.6835	-0.375055	0.771076	0.319865	-1.17254	0.240979	0.336767		69.6835	1.38468	2.61115	0.243146	5.69485	1.23479e-08	7.69581e-07
C07B5.6	C07B5.6	86.8718	55.9903	42.4036	69.5414	69.2212	45.4606	43.4399	41.7608	40.571	35.9898	38.9409	39.3861	88.7647	62.0959	33.1284	55.3651	57.379	65.5119	64.4149	47.3154	76.1497	46.2683	37.5574	47.9454		53.8114	-0.00127485	0.999117	0.280379	-0.00454689	0.996372	0.998654		53.8114	-0.137602	0.909029	0.307474	-0.447525	0.654496	0.735287		53.8114	-0.0477479	0.967445	0.288238	-0.165654	0.868429	0.928123
C07C7.1	C07C7.1	9.44258	6.99879	8.96998	7.90243	5.44436	16.7486	19.1944	25.4639	15.2141	55.9842	52.5702	54.1559	10.2028	12.6297	4.14105	6.92064	11.1056	17.9629	20.7438	16.985	12.6916	135.246	146.709	164.213		34.9017	0.240974	1.18179	0.40852	0.589872	0.555277	0.634712		34.9017	1.44259	2.71808	0.297079	4.8559	1.1984e-06	5.02611e-06		34.9017	0.404385	1.32352	0.421997	0.958265	0.337929	0.517576
C07D10.2	bath-44	1636.4	1733.08	1783.4	1443.77	1352.54	1379.77	1907.32	2018.78	1920.02	2485.3	2415.31	2354.3	2216.06	2184.94	2630.6	1685.67	1781.53	1784.67	1185.67	1857.43	1506.84	1335.85	1234.7	1347.27		1799.22	-0.303396	0.810342	0.116872	-2.59596	0.00943262	0.0189955		1799.22	0.311475	1.24098	0.116428	2.67525	0.00746731	0.0168564		1799.22	-0.421035	0.746889	0.116664	-3.60894	0.000307449	0.00318908
C07D10.4	nas-7	455.133	417.303	552.062	527.882	564.658	571.847	398.031	394.181	372.239	325.908	338.786	348.567	1642.66	1462.94	1537.37	1746.97	1809.29	1949.51	733.675	437.971	505.357	459.124	515.241	521.406		774.504	0.223676	1.1677	0.142223	1.57271	0.115786	0.16942		774.504	-0.200599	0.870189	0.147641	-1.35869	0.174243	0.257998		774.504	0.245755	1.18571	0.137107	1.79244	0.0730629	0.180665
C07D10.5	C07D10.5	6468.17	6119.57	4258.3	4540.74	4388.93	3763.66	737.468	692.618	657.251	602.829	608.451	560.267	3004.73	3000.6	2564.35	3206.23	3778.69	3560.89	1273.01	1827.1	1929.12	1195.86	1328.59	1173.46		2551.7	-0.408202	0.753562	0.152485	-2.677	0.00742836	0.0154012		2551.7	-0.236663	0.848706	0.158693	-1.49132	0.135877	0.209618		2551.7	0.299388	1.23062	0.153169	1.95462	0.0506282	0.139577
C07E3.1	stip-1	1382.39	1641.22	1378.12	1091.33	1000.98	935.532	929.412	913.645	985.876	864.755	744.744	859.601	149.982	162.081	133.549	114.685	99.0251	90.8713	615.763	1030.02	887.259	651.315	597.397	698.804		748.265	-0.539774	0.687878	0.144478	-3.73604	0.000186939	0.000582345		748.265	-0.196344	0.872759	0.146608	-1.33924	0.180492	0.265852		748.265	-0.547695	0.684112	0.177511	-3.08542	0.00203266	0.013561
C07E3.2	pro-2	1796.92	1829.31	1471.89	1171.93	1159.65	1148.48	1702.24	1664.32	1666.46	901.745	838.202	931.481	39.7911	33.6792	33.1284	26.6939	15.733	14.793	1039.37	1148.91	1216.09	1087.9	1097.38	1223.81		969.163	-0.550361	0.682849	0.0984173	-5.59211	2.24321e-08	1.88343e-07		969.163	-0.913877	0.530757	0.100217	-9.11896	7.58479e-20	1.11092e-18		969.163	-0.897489	0.53682	0.254883	-3.52118	0.000429633	0.00410064
C07E3.3	C07E3.3	295.553	359.563	649.916	490.741	552.992	602.951	975.883	1071.52	1056.88	902.744	936.528	970.867	1059.05	1184.03	1132.58	1580.87	1043	1643.08	1400.75	1096.75	1179.17	1778.36	1681.87	1709.25		1056.45	0.333591	1.26015	0.20469	1.62974	0.103157	0.153508		1056.45	-0.143602	0.905256	0.202271	-0.709949	0.477736	0.582355		1056.45	0.337743	1.26378	0.201556	1.67567	0.0938021	0.215435
C07E3.6	ceh-58	1876.24	1620.22	1528.97	1676.11	1668.31	1591.92	3113.53	3003.72	3026.6	1723.51	1759.15	1822.59	1595.72	1587.13	1424.52	1477.06	1612.17	1250.01	1829.82	1823.46	1912.97	2127.15	2075.05	2061.65		1882.82	-0.0251312	0.982731	0.0902799	-0.27837	0.780729	0.827156		1882.82	-0.785369	0.580203	0.0898439	-8.74148	2.30068e-18	2.99919e-17		1882.82	-0.0856022	0.942391	0.0916339	-0.934176	0.350213	0.529526
C07E3.9	C07E3.9	278.556	230.085	110.086	390.38	327.439	319.819	363.683	352.421	317.468	526.851	506.231	500.203	234.665	216.81	155.289	166.095	292.448	197.592	132.105	137.093	124.609	373.705	305.154	372.775		288.815	0.7489	1.68051	0.235387	3.18157	0.00146479	0.00367012		288.815	0.568968	1.48346	0.23291	2.44287	0.0145712	0.0305559		288.815	0.114283	1.08244	0.23991	0.476357	0.63382	0.771645
C07F11.1	tol-1	1414.5	2570.31	4113.15	1902.11	2557.29	2174.13	3626.73	3725.88	3649.36	2569.27	2170.95	2501.02	6424.72	6366.41	7406.27	5255.73	4572.74	4882.75	5300.58	6346.33	5481.62	6205.88	6033.83	6057.9		4304.56	-0.28809	0.818986	0.220821	-1.30463	0.192019	0.261856		4304.56	-0.603465	0.658171	0.220826	-2.73276	0.00628052	0.0144133		4304.56	-0.457266	0.728365	0.220308	-2.07557	0.0379333	0.114432
C07F11.2	C07F11.2	18.8852	23.6209	24.4636	28.4487	20.2219	23.9266	9.09208	9.16701	11.157	29.9915	28.2321	33.4782	33.6694	19.997	15.5289	20.7619	24.0622	12.6797	39.304	26.6907	43.8437	54.5728	69.2465	56.3358		28.2241	0.110525	1.07962	0.295872	0.373557	0.708734	0.765985		28.2241	1.6402	3.11708	0.363233	4.51556	6.31508e-06	2.42227e-05		28.2241	-0.257398	0.836595	0.323048	-0.796779	0.42558	0.603645
C07G1.1	svh-1	34.9376	37.6185	70.129	45.0438	47.4437	63.0068	24.2455	29.5381	16.2284	14.9958	13.6293	17.7237	24.4868	29.4693	30.0226	36.5805	18.5094	41.2091	64.4149	49.7418	44.9975	43.8956	29.3417	25.1713		35.5159	0.116334	1.08398	0.295278	0.39398	0.693596	0.753125		35.5159	-0.595097	0.662	0.371941	-1.59998	0.109604	0.175213		35.5159	0.188997	1.13997	0.333313	0.567026	0.570696	0.72508
C07G1.4	wsp-1	1872.46	2197.62	3044.9	2026.97	2174.63	2184.5	3536.82	3644.4	3820.78	3410.03	2956.59	3199.13	2983.31	3337.39	3585.12	3263.57	2445.09	3154.08	4434.8	4468.27	4400.53	4299.39	3617.25	3767.31		3242.71	-0.156358	0.897287	0.142567	-1.09674	0.272757	0.351958		3242.71	-0.201832	0.869446	0.14219	-1.41946	0.155766	0.235043		3242.71	-0.16068	0.894603	0.142344	-1.12881	0.258976	0.435554
C07G1.5	hgrs-1	2066.98	2128.51	2413.74	1684.01	1770.2	1652.53	4320.76	4333.96	4410.07	5428.46	5118.78	5303.34	3928.09	4279.36	4028.21	3731.21	3354.82	3852.52	3015.49	4246.25	3929.78	3815.35	4086.72	3537.17		3601.51	-0.372324	0.772537	0.106488	-3.4964	0.000471574	0.00133742		3601.51	0.278843	1.21322	0.105037	2.6547	0.00793783	0.0177968		3601.51	-0.161796	0.893912	0.105387	-1.53525	0.124722	0.262399
C07G2.1	cpg-1	2727.02	3049.72	2586.62	911.15	998.652	931.544	30996.9	25660.5	35497.6	31479.1	24547.3	31406.5	1729.38	1722.9	2220.64	1371.27	1529.8	1670.55	1093.96	2064.89	1321.08	226.596	214.781	230.138		8591.19	-1.55747	0.339746	0.180961	-8.60665	7.52292e-18	7.36355e-16		8591.19	-0.0758902	0.948757	0.178878	-0.424257	0.671378	0.749521		8591.19	-0.31147	0.80582	0.181057	-1.72028	0.0853807	0.202142
C07G2.2	atf-7	5716.54	6046.96	6460.02	4887.65	5225.81	4731.89	8908.22	9146.64	8511.8	10164.1	10167.5	9919.38	5559.52	5897.01	5409.25	5765.88	5686.08	5453.33	7762.54	8135.82	8751.44	11753.3	11870.5	11952.8		7661.83	-0.295963	0.814528	0.0648547	-4.56347	5.03139e-06	2.28543e-05		7661.83	0.187366	1.13868	0.0643632	2.91107	0.00360188	0.00870856		7661.83	0.00348046	1.00242	0.0651541	0.0534189	0.957398	0.981353
C07G2.3	cct-5	8502.1	8325.94	6385.81	6235.81	6213.57	6461.79	4975.39	4734.25	5088.62	5016.58	5153.82	4995.14	4257.64	4568.79	4731.15	4172.16	4385.79	3713.04	5829	6929.88	5816.22	9441.1	9627.61	10075.7		6068.21	-0.295607	0.814729	0.101621	-2.90892	0.00362684	0.00817474		6068.21	0.035371	1.02482	0.102173	0.346188	0.729202	0.797298		6068.21	-0.143665	0.905217	0.102412	-1.40281	0.160674	0.315634
C07H4.2	clh-5	1728.94	2006.9	2022.32	1593.13	1598.31	1508.97	2545.78	2655.38	2508.3	2302.35	2276.09	2283.41	2078.32	2000.75	2085.02	1777.61	1959.22	1671.61	2007.78	2598.71	2281.03	2892.36	2962.34	2780.83		2171.89	-0.293224	0.816076	0.0903532	-3.24531	0.00117323	0.0030054		2171.89	-0.168033	0.890056	0.0898344	-1.87047	0.0614185	0.107617		2171.89	-0.188233	0.87768	0.0907082	-2.07515	0.0379731	0.114432
C07H6.3	cls-1	655.315	761.119	1038.07	1107.13	1145.65	1087.07	1327.44	1533.95	1320.59	632.821	546.146	664.64	1144.76	1349.27	1015.59	924.399	796.828	1004.87	1779.6	1589.31	1752.6	2770.17	2728.78	3026.55		1320.94	0.443213	1.35963	0.144251	3.0725	0.0021227	0.00512522		1320.94	-1.18172	0.440824	0.145572	-8.11781	4.74666e-16	5.17427e-15		1320.94	-0.364921	0.776511	0.144719	-2.52157	0.0116831	0.0483502
C07H6.4	sap-140	2572.16	2733.03	2196.02	1727.47	1671.42	1603.88	2664.99	2598.34	2833.89	2504.29	1769.86	2432.09	575.44	624.117	716.402	489.388	484.945	599.116	1321.05	2016.36	1697.21	1168.57	991.75	957.709		1622.9	-0.584282	0.666981	0.152428	-3.83317	0.000126501	0.000410271		1622.9	-0.271975	0.828185	0.152412	-1.78448	0.0743461	0.126415		1622.9	-0.284815	0.820847	0.158424	-1.7978	0.0722084	0.179469
C07H6.6	clk-2	327.658	454.921	457.469	291.6	330.551	289.512	606.138	604.004	665.365	770.782	645.445	634.116	799.902	789.355	1168.81	534.866	567.312	493.452	662.709	832.265	864.183	1110.44	1210.05	1221.41		680.513	-0.44503	0.734569	0.159406	-2.7918	0.00524154	0.0112823		680.513	0.12848	1.09314	0.155772	0.824797	0.409487	0.515259		680.513	-0.789084	0.578711	0.155598	-5.07129	3.9513e-07	1.5408e-05
C07H6.8	cux-7	1033.02	1043.69	845.625	626.663	637.768	636.449	526.33	470.573	495.981	356.899	275.507	342.659	269.355	330.477	326.108	245.188	250.802	255.708	174.684	230.511	228.449	194.564	185.44	178.597		423.377	-0.619838	0.650744	0.117011	-5.29726	1.17556e-07	8.18056e-07		423.377	-0.614972	0.652943	0.125388	-4.90457	9.36323e-07	3.98647e-06		423.377	-0.300561	0.811937	0.131422	-2.28698	0.0221968	0.0774328
C08B11.1	zyg-11	1711.94	2183.62	2027.22	1056.55	1022.76	1034.43	2359.9	1960.72	2423.11	2720.23	2647.98	2845.64	3178.18	3129	3295.24	2436.06	2449.71	2357.37	1577.62	2547.75	1639.53	880.284	901.378	950.517		2055.7	-0.927816	0.525654	0.140359	-6.6103	3.83535e-11	7.37239e-10		2055.7	0.284498	1.21799	0.139384	2.04111	0.04124	0.07611		2055.7	-0.40675	0.754321	0.139191	-2.92224	0.00347523	0.0203525
C08B11.2	hda-2	1682.67	1485.49	1042.96	1033.64	958.208	902.034	602.098	609.097	609.58	728.794	773.95	690.241	1635.51	1647.12	1974.25	1204.19	1477.97	1253.18	925.827	1709.42	1285.31	994.175	1053.95	1005.65		1136.89	-0.540743	0.687417	0.175667	-3.07823	0.00208237	0.00503437		1136.89	0.268365	1.20444	0.178754	1.50131	0.133275	0.206546		1136.89	-0.417537	0.748702	0.175475	-2.37947	0.0173376	0.064967
C08B11.3	swsn-7	7334.05	9196.41	9964.84	6186.02	5648.91	5242.33	13760.4	13351.2	13623.8	12175.6	11013.4	11999	9716.16	9790.11	10139.4	6967.1	5910.96	6553.3	6207.85	10528.3	9383.72	7216.67	6726.3	6886.16		8980.08	-0.633727	0.644509	0.1445	-4.38567	1.1563e-05	4.81887e-05		8980.08	-0.211203	0.863817	0.144309	-1.46354	0.143319	0.219259		8980.08	-0.609463	0.655441	0.144547	-4.21636	2.48272e-05	0.00045602
C08B11.4	nrf-6	342.766	407.68	288.67	470.985	425.438	415.526	527.34	584.651	499.024	654.815	576.325	625.254	440.762	446.249	415.14	379.646	418.312	316.993	696.554	700.025	734.96	1580.24	1596.19	1664.9		633.685	0.337586	1.26364	0.119119	2.83403	0.00459653	0.0100629		633.685	0.20444	1.15224	0.116599	1.75336	0.0795408	0.134016		633.685	-0.221734	0.857534	0.12116	-1.83009	0.0672359	0.171308
C08B11.7	ubh-4	3397.44	2609.67	1590.13	1753.55	1719.64	1540.88	1595.15	1528.85	1556.91	1855.47	2066.79	1818.65	1876.3	1577.66	1509.41	1302.07	1887.95	1555.38	2052.54	2825.58	2782.92	1584.99	1605.58	1527.06		1880.02	-0.599159	0.660139	0.192211	-3.11718	0.00182587	0.00447092		1880.02	0.294498	1.22646	0.192836	1.52719	0.126713	0.197976		1880.02	-0.0646695	0.956164	0.192992	-0.335089	0.737558	0.847773
C08B11.9	C08B11.9	2007.49	1496.87	851.333	1141.9	1048.43	934.734	545.525	519.464	570.023	447.873	513.046	475.587	732.563	723.049	609.77	709.86	893.077	677.308	474.923	487.712	576.891	596.742	555.145	517.81		754.464	-0.478405	0.717771	0.198458	-2.41061	0.0159259	0.0301765		754.464	-0.186683	0.878623	0.20288	-0.920165	0.357486	0.464029		754.464	0.14318	1.10434	0.200968	0.71245	0.476186	0.647947
C08B6.13	srxa-19	2.83277	2.62455	4.07727	0	0.777766	2.39266	47.4808	42.7794	43.6139	77.9779	86.6434	95.5112	7.14198	7.36732	10.3526	3.95465	8.32921	13.7364	0	2.42643	1.15378	0	0	1.19863		19.2655	-1.608	0.328054	0.868687	-1.85106	0.0641604	0.101767		19.2655	0.958474	1.94325	0.261846	3.66045	0.000251777	0.00075914		19.2655	0.0503945	1.03555	0.459901	0.109577	0.912745	0.95356
C08B6.4	C08B6.4	4430.46	4610.45	5446.41	4108.47	4517.26	4891.4	7961.63	7724.73	7186.15	9001.45	9918.24	9367.98	8371.43	8181.93	8784.21	9625.62	9011.28	9262.53	8268.03	5910.78	4657.82	5025.45	5336.67	5030.67		6942.96	-0.100096	0.932971	0.142362	-0.703114	0.481985	0.565089		6942.96	0.306562	1.23676	0.142071	2.15781	0.0309424	0.0591483		6942.96	0.13895	1.1011	0.14205	0.978177	0.327987	0.508003
C08B6.7	wdr-20	2135.91	2801.27	3475.46	1802.54	1831.64	1796.89	4428.85	3975.43	4388.77	4098.84	3446.27	3924.82	3776.07	3873.1	4302.55	2976.86	3458.47	2908.94	3765.54	5070.03	4135.16	3365.72	3204.12	3237.51		3424.2	-0.631687	0.645421	0.140997	-4.48015	7.45897e-06	3.25439e-05		3424.2	-0.157527	0.896561	0.140373	-1.1222	0.261777	0.360374		3424.2	-0.354938	0.781903	0.140576	-2.52488	0.0115738	0.0480892
C08B6.8	C08B6.8	2973.47	2180.12	1043.78	1536.23	1349.42	1269.71	334.386	303.53	325.583	193.945	220.989	185.115	308.126	232.597	231.899	250.132	346.125	231.405	279.495	411.28	380.748	137.618	193.655	131.85		627.134	-0.576375	0.670647	0.252251	-2.28493	0.0223172	0.0405217		627.134	-0.683137	0.62281	0.261824	-2.60915	0.00907678	0.0201036		627.134	0.100068	1.07182	0.261188	0.383127	0.701625	0.822791
C08C3.1	egl-5	241.73	286.95	302.533	388.009	419.216	365.28	287.916	345.291	314.426	119.966	119.743	121.112	52.0345	54.7286	60.0452	64.2631	38.8697	35.9259	194.336	134.667	164.991	80.6729	76.2885	71.9181		180.871	0.494792	1.40912	0.142153	3.4807	0.000500102	0.00140652		180.871	-1.39297	0.380781	0.156615	-8.89423	5.88249e-19	8.02706e-18		180.871	-0.261052	0.834479	0.210527	-1.23999	0.214978	0.384975
C08C3.4	cyk-7	1238.87	1083.94	791.805	438.585	426.216	404.36	614.22	412.515	718.107	499.859	513.046	547.466	57.1359	64.2009	71.4331	30.6485	38.8697	17.9629	246.742	501.058	309.214	100.841	95.0672	94.6921		388.202	-1.29482	0.407588	0.226932	-5.70575	1.15829e-08	1.07038e-07		388.202	-0.161231	0.894262	0.228348	-0.706073	0.480143	0.584574		388.202	-1.12856	0.457371	0.290091	-3.89037	0.000100091	0.0013491
C08D8.2	tmd-2	797.898	887.972	1056.01	1238.31	1220.31	1282.47	1162.78	1402.55	1073.1	622.824	560.748	729.627	576.46	610.435	581.818	626.812	514.56	709.007	764.244	564.145	610.351	667.924	753.495	715.585		822.06	0.447638	1.36381	0.142297	3.14581	0.00165628	0.00410046		822.06	-0.927356	0.525821	0.144209	-6.43062	1.27084e-10	8.30482e-10		822.06	0.0641249	1.04545	0.14655	0.437563	0.661703	0.792826
C08E8.4	C08E8.4	23.6065	15.7473	12.2318	45.0438	45.8882	51.8411	14.1432	12.2227	19.2712	101.971	113.902	118.158	22.4462	12.6297	15.5289	64.2631	52.7517	76.0783	24.0191	23.0511	20.7681	634.706	680.728	588.53		116.23	1.48736	2.80375	0.253002	5.87882	4.13197e-09	4.34149e-08		116.23	2.87179	7.31975	0.262885	10.9241	8.83811e-28	2.12872e-26		116.23	1.92185	3.78909	0.264417	7.26826	3.6416e-13	6.03512e-11
C08F8.2	C08F8.2	612.824	678.008	570.002	347.707	374.883	366.875	535.422	576.503	533.509	344.902	282.321	373.183	1013.14	889.34	1036.3	891.773	1132.77	859.051	467.281	518.043	534.201	414.042	402.568	417.125		590.491	-0.771983	0.585612	0.121398	-6.35909	2.02952e-10	3.13842e-09		590.491	-0.718129	0.607885	0.124836	-5.75259	8.78885e-09	4.82846e-08		590.491	-0.0265122	0.981791	0.117034	-0.226534	0.820786	0.900429
C08F8.4	mboa-4	31.1605	34.1191	20.3863	17.3853	7.77766	17.5462	6.06138	7.1299	9.12848	14.9958	14.6028	15.7544	6.1217	10.5247	11.3879	7.9093	10.1801	4.22657	6.55067	8.4925	6.9227	9.49093	4.69468	20.3768		12.6219	-1.00207	0.499285	0.386101	-2.59535	0.00944948	0.0190243		12.6219	1.023	2.03214	0.478611	2.13743	0.0325632	0.061919		12.6219	-0.309942	0.806674	0.507288	-0.610978	0.541214	0.702646
C08F8.7	rap-3	497.624	378.81	212.833	597.424	508.659	553.503	69.7059	83.5216	65.9279	121.965	123.637	110.281	89.7849	79.988	80.7505	105.787	114.758	95.0979	120.096	80.0722	85.3799	131.687	136.146	147.432		191.286	0.60955	1.52578	0.207701	2.93476	0.0033381	0.00761489		191.286	0.699578	1.62403	0.236371	2.95967	0.00307971	0.00754465		191.286	0.334541	1.26098	0.235785	1.41884	0.155945	0.309204
C08F8.8	nhr-67	516.509	543.281	525.152	536.575	517.214	517.613	842.532	836.235	775.921	783.778	778.817	763.105	1094.76	1244.02	997.993	1013.38	1003.21	1085.17	429.069	539.881	550.354	656.061	684.249	629.283		744.34	-0.0125373	0.991347	0.098365	-0.127457	0.898578	0.923404		744.34	-0.0778876	0.947444	0.096029	-0.811084	0.417318	0.52256		744.34	-0.105599	0.929419	0.0937538	-1.12635	0.260019	0.436378
C08G5.4	snt-6	171.855	132.977	155.752	232.331	241.885	268.776	65.665	84.5402	65.9279	94.9731	89.564	80.7415	299.963	294.693	335.425	483.456	494.2	412.091	697.646	554.439	583.814	591.997	517.588	659.249		317.065	0.691161	1.61458	0.1431	4.82992	1.36589e-06	7.17066e-06		317.065	0.295645	1.22743	0.178348	1.65768	0.0973819	0.158958		317.065	0.580327	1.49519	0.134539	4.31344	1.60732e-05	0.00032739
C08G5.6	C08G5.6	10.3868	13.1227	7.33908	16.5951	17.8886	16.7486	17.1739	14.2598	13.1856	21.9938	13.6293	14.7698	27.5477	23.1544	26.9168	26.6939	26.8386	32.7559	43.6711	23.0511	26.537	18.9819	28.1681	35.959		21.557	0.739663	1.66979	0.365811	2.02198	0.0431786	0.0717939		21.557	0.173123	1.1275	0.361214	0.479281	0.631739	0.717542		21.557	0.148549	1.10845	0.306688	0.484364	0.628128	0.767092
C08G9.2	C08G9.2	292.72	413.804	715.152	599.004	673.545	572.644	903.146	975.777	784.035	294.917	309.58	303.273	650.941	774.621	694.661	823.556	480.318	632.929	638.69	440.397	554.97	234.901	211.26	213.357		549.508	0.374686	1.29656	0.22764	1.64596	0.0997727	0.149068		549.508	-1.5526	0.340895	0.229565	-6.76324	1.34941e-11	9.64029e-11		549.508	-0.130785	0.913335	0.227438	-0.575034	0.565268	0.721122
C08H9.1	ctsa-3.2	11.3311	15.7473	15.4936	13.4341	14.7776	15.1535	10.1023	11.2041	13.1856	38.989	51.5966	50.2172	65.2981	70.5157	46.5868	73.161	65.7082	73.965	28.3862	23.0511	21.9219	24.9137	9.38935	15.5823		32.488	0.0189071	1.01319	0.332144	0.0569246	0.954605	0.967217		32.488	2.03037	4.08508	0.325058	6.24617	4.20631e-10	2.63094e-09		32.488	0.221496	1.16594	0.22669	0.977084	0.328527	0.508301
C08H9.15	C08H9.15	374.871	266.829	238.928	584.78	485.326	538.349	341.458	360.569	331.668	268.924	321.262	271.764	298.943	313.637	323.002	424.136	451.628	525.151	349.369	272.973	299.984	249.137	241.776	230.138		348.525	0.87217	1.83041	0.143592	6.07395	1.24804e-09	1.527e-08		348.525	-0.261876	0.834003	0.148129	-1.76789	0.0770795	0.130333		348.525	0.581771	1.49669	0.14593	3.98663	6.70176e-05	0.000987257
C08H9.16	C08H9.16	1158.6	1006.95	612.405	599.004	597.324	481.723	529.361	465.48	523.366	446.874	452.688	483.464	433.62	398.888	409.964	311.429	337.796	381.448	204.162	355.472	268.831	199.31	187.787	152.227		458.257	-0.726436	0.604395	0.191631	-3.7908	0.000150165	0.000478815		458.257	-0.134551	0.910954	0.194835	-0.690586	0.489825	0.592996		458.257	-0.270107	0.829258	0.197032	-1.37088	0.170413	0.329091
C08H9.2	vgln-1	12087.5	15649.3	19927.2	11012	11449.5	11343.6	31387.9	32958.5	31147.4	27886.1	26335.7	26087.4	7615.4	7688.32	6484.89	6093.13	4401.53	7343.67	10181.9	12964.4	12350.1	10625.1	10943.3	10183.6		15172.8	-0.495706	0.709214	0.162528	-3.04998	0.00228857	0.00547594		15172.8	-0.249842	0.840989	0.162407	-1.53837	0.123959	0.194192		15172.8	-0.28873	0.818622	0.16292	-1.77222	0.0763582	0.186659
C08H9.3	algn-8	390.923	467.169	512.105	261.57	251.996	257.61	887.993	897.348	837.792	954.73	943.342	1000.41	902.951	951.436	1002.13	739.519	807.008	791.425	295.872	419.772	403.824	344.046	368.532	298.46		624.499	-0.831067	0.562113	0.122091	-6.80694	9.96998e-12	2.27764e-10		624.499	0.144003	1.10497	0.11384	1.26496	0.205885	0.296573		624.499	-0.288893	0.81853	0.11438	-2.52574	0.0115455	0.0480537
C09B7.1	ser-7	11.3311	22.7461	46.4808	26.8683	26.444	21.534	46.4706	61.1134	54.7709	76.9782	82.7493	97.4805	23.4665	35.7841	32.0932	19.7732	32.3914	24.3028	24.0191	12.1321	14.9992	30.8455	29.3417	45.5481		37.486	-0.123541	0.917932	0.337405	-0.366151	0.714252	0.771165		37.486	0.664034	1.58451	0.300875	2.20701	0.0273133	0.052999		37.486	-0.250875	0.840387	0.346418	-0.724196	0.468945	0.641566
C09B8.1	ipp-5	508.011	503.913	673.564	885.862	830.654	832.647	580.883	641.691	526.409	587.834	652.259	631.162	548.912	573.598	601.488	736.553	634.871	684.705	1253.36	823.773	848.03	1701.25	1541.03	1877.06		819.98	0.595855	1.51137	0.146854	4.05746	4.96101e-05	0.000176909		819.98	0.0975799	1.06998	0.148805	0.655759	0.511979	0.613357		819.98	0.254	1.19251	0.148634	1.70889	0.0874708	0.205887
C09B8.3	C09B8.3	122.754	86.61	100.301	167.531	173.442	155.523	178.811	183.34	165.327	87.9751	104.167	81.7261	108.15	96.8276	104.562	130.503	135.118	144.76	161.583	95.844	100.379	53.3865	56.3361	46.7468		118.404	0.684225	1.60684	0.169967	4.02563	5.68221e-05	0.000200426		118.404	-0.945167	0.519369	0.17655	-5.35354	8.62485e-08	4.20274e-07		118.404	0.405737	1.32477	0.177935	2.28025	0.0225929	0.0783019
C09B8.4	C09B8.4	435.303	276.452	159.829	390.38	281.551	272.764	19.1944	10.1856	13.1856	370.895	413.747	391.891	768.273	557.811	543.513	341.089	293.373	453.3	546.981	463.448	650.733	4493.96	5060.86	4693.85		912.607	0.118384	1.08552	0.253259	0.467444	0.640183	0.708362		912.607	4.78797	27.6263	0.334095	14.3312	1.39776e-46	7.62935e-45		912.607	-0.782291	0.581443	0.251697	-3.10806	0.0018832	0.0127489
C09B8.6	hsp-25	2739.29	2180.12	2615.16	4175.64	3775.28	4043.6	4602.61	5143.71	4977.05	2411.32	2682.05	2610.31	2149.74	2092.32	2011.52	2588.32	2790.29	2435.56	3917.3	3117.96	3224.82	2050.04	2043.36	2222.27		3024.98	0.670863	1.59203	0.100755	6.65838	2.76859e-11	5.65812e-10		3024.98	-0.934447	0.523243	0.100905	-9.26063	2.03238e-20	3.09012e-19		3024.98	0.321621	1.24973	0.101885	3.1567	0.00159566	0.0111559
C09B8.7	pak-1	2531.56	2880	3216.15	2505.86	2534.74	2507.51	5270.37	5646.88	4941.55	4200.81	3957.37	4036.09	3314.9	3635.24	3084.05	2930.4	2710.7	2989.24	2378.98	2528.34	2792.15	2844.91	3067.97	2737.68		3301.81	-0.193258	0.874629	0.0943509	-2.04829	0.0405321	0.0677721		3301.81	-0.379092	0.768921	0.0936714	-4.04704	5.18692e-05	0.000175527		3301.81	-0.217563	0.860017	0.0944808	-2.30273	0.0212942	0.0755607
C09B8.8	C09B8.8	19.8294	23.6209	20.3863	23.7073	35.7772	24.7242	32.3274	23.4268	38.5425	89.9745	108.061	111.266	52.0345	51.5712	51.7631	62.2857	69.4101	67.6251	44.7629	31.5436	57.6891	67.6229	80.9832	79.1099		52.8352	0.400527	1.31999	0.264791	1.51262	0.130377	0.187851		52.8352	1.7138	3.28023	0.226097	7.57992	3.45779e-14	3.17227e-13		52.8352	0.359769	1.28322	0.215184	1.67191	0.0945425	0.216862
C09B9.1	C09B9.1	0	0	1.63091	0.790243	2.3333	1.59511	2.02046	0	2.02855	16.9952	10.7087	11.8158	7.14198	3.15742	0	13.8413	6.47828	3.16993	2.18356	0	2.30757	45.0819	32.8627	41.9522		8.67063	1.44045	2.71405	1.2398	1.16184	0.2453	0.321266		8.67063	3.283	9.73377	0.846689	3.87745	0.000105555	0.000339629		8.67063	1.1907	2.28263	0.663364	1.79494	0.0726639	0.180104
C09B9.8	hot-9	169.966	154.848	165.537	226.009	246.552	268.776	183.862	215.934	206.912	126.964	151.869	126.035	63.2576	59.991	70.3979	77.1157	63.8573	69.7384	351.552	174.703	280.369	141.178	160.793	200.172		164.85	0.596479	1.51202	0.186657	3.19558	0.00139549	0.00351275		164.85	-0.583198	0.667483	0.193518	-3.01367	0.0025811	0.00641009		164.85	0.120596	1.08718	0.223186	0.540337	0.588965	0.738062
C09D1.1	unc-89	837.557	1823.19	7021.87	1741.7	2522.3	2325.67	7168.6	7015.82	7165.86	9098.42	7363.72	9623.99	3318.98	4052.02	3652.41	3673.87	1575.15	3220.65	3137.77	1966.62	2432.17	3625.54	3382.51	3754.12		4229.19	-0.555298	0.680516	0.480761	-1.15504	0.248074	0.324612		4229.19	0.289025	1.22181	0.48049	0.601521	0.547493	0.645105		4229.19	-0.38023	0.768315	0.480762	-0.790891	0.429008	0.60687
C09D4.1	C09D4.1	239.842	271.203	335.151	360.351	368.661	356.507	921.33	977.814	920.963	862.756	832.361	860.586	679.509	676.741	746.425	628.789	523.815	532.548	991.334	720.65	808.802	576.574	550.451	584.934		638.671	0.356283	1.28012	0.126071	2.82605	0.0047126	0.0102958		638.671	-0.142043	0.906235	0.117389	-1.21001	0.226274	0.31999		638.671	-0.319422	0.801391	0.120319	-2.65479	0.00793584	0.0367164
C09D4.3	C09D4.3	2.83277	5.24909	5.70817	3.16097	2.3333	6.38044	3.03069	0	2.02855	11.9966	4.86761	9.84652	15.3043	30.5217	20.7053	22.7392	28.6895	17.9629	3.27533	9.70572	8.07648	5.93183	10.563	14.3836		10.2206	-0.235826	0.849199	0.610162	-0.386497	0.699129	0.757364		10.2206	2.39425	5.25705	0.7722	3.10056	0.00193155	0.00492759		10.2206	0.0681042	1.04834	0.406125	0.167693	0.866825	0.926952
C09D4.4	C09D4.4	1131.22	1524.86	1767.09	730.975	817.432	683.504	1912.37	1714.23	1868.3	1876.47	1743.58	1824.56	15883.8	17412.1	15500	16154.7	13847.8	15213.5	1353.8	2249.3	1619.91	936.043	846.215	875.003		4978.62	-0.987248	0.504439	0.15825	-6.23855	4.41658e-10	6.31826e-09		4978.62	-0.0132849	0.990834	0.157021	-0.0846056	0.932575	0.957589		4978.62	-0.109931	0.926632	0.154869	-0.709833	0.477808	0.648822
C09E10.2	dgk-1	524.063	776.866	1241.12	956.194	1067.87	1005.72	1715.37	1796.73	1723.25	1366.61	1340.54	1421.84	1427.38	1486.09	1481.46	1705.44	1519.62	1651.53	1936.81	1400.05	1552.99	1493.64	1368.5	1522.27		1395.08	0.252053	1.1909	0.189096	1.33293	0.182554	0.250789		1395.08	-0.342501	0.788673	0.188143	-1.82043	0.0686937	0.118415		1395.08	0.149981	1.10955	0.188177	0.797019	0.42544	0.603645
C09E8.1	C09E8.1	743.131	789.114	993.222	977.53	971.43	997.741	2065.92	2349.81	2046.81	1925.45	1839.96	1862.96	965.188	1007.22	873.762	820.59	785.722	741.763	1598.36	1592.95	1771.06	1291.95	1228.83	1219.01		1310.81	0.221068	1.1656	0.100084	2.20882	0.0271872	0.0480393		1310.81	-0.199388	0.87092	0.0971007	-2.05342	0.0400318	0.0741145		1310.81	-0.277181	0.825202	0.101843	-2.72165	0.00649571	0.0321152
C09E8.2	lips-7	457.021	469.794	539.83	729.394	717.878	895.654	168.709	183.34	183.584	183.948	230.725	180.191	178.55	163.133	131.478	237.279	221.187	188.082	336.268	251.135	248.063	157.787	165.487	176.199		308.113	0.674984	1.59658	0.14102	4.78645	1.69761e-06	8.75157e-06		308.113	0.151759	1.11092	0.159158	0.953509	0.340332	0.446338		308.113	0.451504	1.36746	0.160249	2.81751	0.00483976	0.0258735
C09E8.3	mlt-10	2376.7	2602.68	3716.84	2792.72	3140.62	3093.71	3253.95	3967.28	4064.2	192.945	208.334	236.316	8297.96	8354.54	9821.54	6435.2	4136.84	6333.52	5707.81	4609	4356.68	404.551	390.832	294.864		3699.57	0.0536664	1.0379	0.181545	0.295609	0.767529	0.81613		3699.57	-4.14558	0.0565011	0.189663	-21.8576	6.57975e-106	1.99682e-103		3699.57	-0.647171	0.638531	0.181025	-3.57504	0.000350173	0.00353665
C09E9.1	C09E9.1	1247.37	955.335	587.126	843.189	682.879	873.322	288.926	271.955	278.926	233.934	263.824	271.764	599.927	548.339	635.651	710.848	974.518	692.101	573.183	706.091	586.122	448.446	456.557	522.605		593.872	-0.216684	0.860541	0.19302	-1.1226	0.261607	0.339455		593.872	-0.126005	0.916365	0.202725	-0.621557	0.534233	0.633416		593.872	0.414851	1.33316	0.194916	2.12836	0.0333075	0.103485
C09F12.1	clc-1	146.36	106.732	70.9444	307.404	248.885	330.188	34.3478	47.8722	36.5139	80.9771	93.4581	68.9256	43.8722	49.4663	30.0226	60.3084	87.9195	49.6622	110.27	66.7268	77.3034	281.169	295.765	332.022		127.38	1.45649	2.7444	0.236254	6.16492	7.05173e-10	9.33413e-09		127.38	1.03587	2.05035	0.272993	3.79449	0.000147945	0.000465422		127.38	0.687816	1.61084	0.275971	2.49235	0.0126901	0.0513519
C09F12.2	C09F12.2	17.9409	14.8724	10.6009	37.9317	20.2219	33.4973	7.07162	3.05567	6.08566	2.99915	1.94704	3.93861	0	2.10495	3.10579	8.89796	6.47828	8.45314	7.64244	7.27929	16.153	4.74546	2.34734	2.39727		9.57366	1.08557	2.12221	0.394331	2.75293	0.00590637	0.0125249		9.57366	-0.870447	0.546977	0.675749	-1.28812	0.197703	0.286874		9.57366	2.19589	4.58174	0.773278	2.83972	0.0045153	0.0244255
C09F12.3	C09F12.3	16.0524	16.6221	16.3091	26.078	23.333	24.7242	7.07162	6.11134	6.08566	14.9958	15.5763	4.92326	7.14198	14.7346	5.17631	17.7959	14.8075	11.6231	53.4971	38.8229	34.6135	28.4728	25.8207	40.7536		19.6309	0.597318	1.5129	0.331977	1.79928	0.0719746	0.112389		19.6309	0.880993	1.84164	0.467127	1.88598	0.0592975	0.104456		19.6309	0.718455	1.64542	0.420933	1.70682	0.0878559	0.206456
C09F5.1	C09F5.1	2179.35	2150.38	2496.92	3833.47	3859.27	3968.63	4129.82	4477.57	3711.24	2161.39	2186.53	2034.29	3170.02	3503.68	3482.62	3993.21	3221.55	3596.81	3707.68	2700.62	3147.52	1870.9	1864.96	1957.37		3058.58	0.772276	1.70796	0.109841	7.03087	2.05252e-12	5.76177e-11		3058.58	-0.948708	0.518096	0.110225	-8.60702	7.49821e-18	9.41869e-17		3058.58	0.0901214	1.06446	0.109816	0.820659	0.411841	0.590472
C09F5.2	orai-1	559.945	541.531	440.345	385.639	391.216	334.175	222.251	230.194	215.027	253.928	227.804	226.47	473.412	465.193	409.964	414.25	493.274	538.888	482.566	664.842	521.51	663.179	733.543	644.865		438.917	-0.471505	0.721212	0.133579	-3.52978	0.000415899	0.00119732		438.917	0.0852713	1.06089	0.145745	0.585072	0.558499	0.654718		438.917	0.100538	1.07217	0.134923	0.745152	0.45618	0.631088
C09F9.2	C09F9.2	3128.33	5145.86	8319.25	4396.91	4993.26	4897.78	17444.7	19792.6	17556.1	10299.1	9551.22	10331	11752.6	12686.5	10458.2	8855.45	7093.71	8109.73	10685.2	11354.5	13771.6	12701.2	14369.2	12962		10444	-0.215977	0.860963	0.210189	-1.02754	0.304168	0.385272		10444	-0.860349	0.550819	0.209907	-4.09872	4.15445e-05	0.000142947		10444	-0.536562	0.689412	0.210004	-2.55501	0.0106186	0.0453077
C09F9.3	glna-1	26.4392	39.3682	73.3908	32.4	46.666	45.4606	376.816	419.645	361.082	1918.46	1886.68	1901.36	495.858	498.873	474.15	552.662	545.101	501.905	978.233	1413.4	942.641	3343.18	3207.64	3477.24		981.61	-0.177428	0.884278	0.232223	-0.76404	0.444844	0.527866		981.61	2.30156	4.92992	0.173147	13.2925	2.55756e-40	1.06034e-38		981.61	0.123283	1.08921	0.174792	0.705314	0.480615	0.651057
C09G1.4	C09G1.4	288.943	300.948	468.886	407.765	385.772	425.097	619.271	664.099	563.937	483.863	446.846	464.756	583.602	629.379	624.264	705.905	494.2	815.728	1056.84	838.332	808.802	575.388	558.666	606.509		575.742	0.200842	1.14937	0.174382	1.15174	0.249428	0.326105		575.742	-0.404716	0.755385	0.173067	-2.33849	0.0193619	0.0391521		575.742	0.132818	1.09643	0.171859	0.772828	0.439624	0.616369
C09G1.5	C09G1.5	187.907	187.218	168.799	152.517	188.219	149.94	347.519	310.66	348.911	381.892	418.614	365.306	410.154	433.619	357.166	559.583	506.231	430.054	104.811	92.2043	76.1497	92.5366	117.367	89.8976		269.886	-0.146961	0.903151	0.144102	-1.01984	0.307807	0.38869		269.886	0.211202	1.15765	0.133862	1.57776	0.114622	0.182084		269.886	0.317733	1.24637	0.131281	2.42025	0.0155098	0.0597975
C09G12.1	ceh-53	145.416	122.479	98.6698	176.224	206.886	149.143	229.322	235.287	271.826	108.969	119.743	114.22	129.576	119.982	84.8916	81.0703	104.578	105.664	74.2409	66.7268	96.9178	55.7592	88.0252	57.5345		126.798	0.541863	1.45585	0.192183	2.81951	0.00480968	0.010474		126.798	-1.10245	0.465724	0.194186	-5.67732	1.36824e-08	7.33984e-08		126.798	-0.199527	0.870836	0.205848	-0.969292	0.332399	0.51201
C09G4.1	hyl-1	1910.23	1895.8	1431.94	1666.62	1702.53	1573.58	1705.27	1729.51	1628.93	1610.54	1572.24	1481.9	254.051	245.226	226.723	174.005	231.367	192.309	1404.03	1096.75	1224.16	1302.63	1238.22	1215.42		1196.42	-0.0831798	0.943975	0.115028	-0.723124	0.469604	0.552925		1196.42	-0.118426	0.921192	0.11579	-1.02277	0.306419	0.409873		1196.42	-0.278481	0.824459	0.137695	-2.02244	0.0431308	0.125164
C09G4.2	pkg-2	1021.69	878.348	1467.82	1141.9	1094.32	1203.51	3635.82	3209.47	3850.19	1898.46	1808.8	1937.79	1869.16	1838.67	1756.84	1900.21	1462.24	1912.52	3486.05	3223.51	2917.92	3381.14	3060.93	3694.19		2235.48	0.0297868	1.02086	0.149041	0.199856	0.841593	0.877082		2235.48	-0.921954	0.527794	0.147495	-6.25076	4.08472e-10	2.56122e-09		2235.48	-0.0512623	0.965092	0.148254	-0.345774	0.729513	0.842643
C09G4.3	cks-1	9458.64	6770.46	4969.37	4608.7	4117.49	3601.76	8660.71	7891.78	9105.16	9321.36	8507.61	8109.59	216.3	239.964	249.498	172.027	235.069	139.477	2310.2	4441.58	3559.42	1416.52	1310.99	1312.5		4196.92	-0.781939	0.581585	0.213728	-3.65856	0.000253634	0.00076886		4196.92	0.0157063	1.01095	0.213593	0.0735338	0.941381	0.963998		4196.92	-0.366318	0.77576	0.228646	-1.60212	0.10913	0.239981
C09G4.4	C09G4.4	9726.8	7033.78	5189.54	4754.1	4218.6	3716.6	1095.09	909.571	1031.52	923.739	935.554	876.34	469.33	539.919	504.173	378.658	417.386	238.801	762.061	2369.41	1835.67	1070.1	933.067	889.387		2117.47	-0.790564	0.578118	0.270599	-2.92154	0.00348306	0.00789955		2117.47	-0.150389	0.901008	0.272867	-0.551142	0.581536	0.67364		2117.47	-0.547503	0.684203	0.276453	-1.98046	0.0476519	0.13344
C09G5.1	lgc-57	17.9409	16.6221	44.0345	37.1414	26.444	34.2948	37.3785	32.5938	32.4568	83.9762	59.3848	70.8949	11.2231	7.36732	7.24684	21.7506	12.9566	14.793	27.2944	25.4775	23.0757	43.8956	48.1204	58.7331		33.129	0.299802	1.23098	0.303204	0.988778	0.322772	0.404634		33.129	1.06399	2.09071	0.287038	3.70681	0.000209889	0.000643144		33.129	0.933279	1.90961	0.420867	2.21751	0.026588	0.0876491
C09G5.13	C09G5.13	28.3277	20.9964	30.1718	60.0585	40.4438	41.4728	12.1228	16.2969	15.2141	17.9949	11.6823	8.86187	26.5274	12.6297	20.7053	16.8073	30.5404	27.4727	62.2313	38.8229	40.3824	53.3865	42.2521	41.9522		29.8897	0.835467	1.78443	0.288536	2.89553	0.00378513	0.00846336		29.8897	-0.181097	0.882032	0.387924	-0.466837	0.640616	0.724561		29.8897	0.320745	1.24898	0.334905	0.957719	0.338205	0.517889
C09G5.3	col-79	2.83277	0.874849	2.44636	1.58049	3.11106	0.797555	17.1739	20.3711	11.157	8.99745	7.78817	7.87722	21.426	24.2069	33.1284	16.8073	7.40374	7.3965	16.3767	13.3454	11.5378	8.30456	2.34734	7.19181		10.6033	-0.151961	0.900026	0.822388	-0.18478	0.853402	0.886161		10.6033	-0.982092	0.506245	0.456125	-2.15312	0.0313091	0.059774		10.6033	-1.31699	0.401372	0.417048	-3.15788	0.0015892	0.0111237
C09G5.6	bli-1	51.9342	40.243	42.4036	34.7707	30.3329	40.6753	73.7468	81.4845	77.085	54.9844	47.7026	49.2326	41.8316	53.6762	41.4105	35.5918	17.5839	35.9259	28.3862	32.7568	41.5362	20.1682	10.563	11.9863		41.5005	-0.344522	0.787569	0.236928	-1.45412	0.145913	0.207028		41.5005	-0.613175	0.653756	0.222749	-2.75277	0.00590941	0.0136608		41.5005	-0.631254	0.645615	0.257034	-2.45591	0.0140528	0.0556615
C09G9.2	npp-23	2792.17	2053.27	1338.16	1131.63	1077.98	910.807	539.463	464.462	627.837	606.828	573.404	575.037	2265.03	2211.25	2673.05	1977.32	2699.59	2155.55	665.984	1056.71	834.185	404.551	422.521	432.707		1270.4	-0.986325	0.504762	0.202339	-4.87462	1.09017e-06	5.85e-06		1270.4	0.105224	1.07566	0.206355	0.509916	0.61011	0.699198		1270.4	-0.0652936	0.955751	0.201798	-0.323559	0.746272	0.853351
C09G9.4	hdl-2	5.66555	5.24909	3.26181	4.74146	4.6666	3.19022	9.09208	9.16701	5.07138	10.9969	9.73522	8.86187	3.06085	5.26237	2.07053	4.94331	2.7764	2.11329	3.27533	4.85286	2.30757	2.37273	0	2.39727		4.79715	-0.156473	0.897216	0.610662	-0.256235	0.797769	0.841899		4.79715	0.342608	1.26805	0.522394	0.655842	0.511926	0.613357		4.79715	-0.0712777	0.951795	0.727637	-0.0979579	0.921966	NA
C09G9.5	C09G9.5	84.9832	69.1131	39.9572	164.371	146.22	145.155	64.6548	79.4474	88.242	61.9825	69.12	56.1252	713.178	620.959	909.996	456.762	595.076	512.472	39.304	27.9039	41.5362	32.0319	44.5994	41.9522		212.714	1.24065	2.36305	0.215091	5.76804	8.01976e-09	7.74793e-08		212.714	-0.311086	0.806035	0.230746	-1.34818	0.177602	0.262254		212.714	-0.520327	0.697214	0.18835	-2.76256	0.00573501	0.0292855
C09H10.10	nbs-1	283.277	262.455	240.559	152.517	176.553	161.904	344.489	303.53	390.496	235.933	290.109	238.286	238.746	204.18	256.745	159.175	252.653	259.934	162.675	246.283	191.528	160.159	146.709	155.823		229.78	-0.67837	0.624871	0.174266	-3.89273	9.91233e-05	0.000329776		229.78	-0.44206	0.736083	0.171519	-2.57732	0.00995695	0.021827		229.78	-0.0592082	0.959791	0.175641	-0.337098	0.736043	0.846699
C09H10.2	rpl-36.A	18062.7	13876.9	8106.42	20057.2	17453.1	23137.9	3440.85	3817.55	3820.78	2478.3	3061.73	2794.44	4475.98	4059.39	3238.3	3961.57	3798.12	5541.04	5902.15	4645.4	5583.15	5064.6	5855.43	5202.07		7393.12	0.598857	1.51452	0.208731	2.86903	0.00411732	0.00908594		7393.12	-0.410672	0.752273	0.209602	-1.9593	0.0500781	0.0902262		7393.12	0.175845	1.12963	0.209366	0.83989	0.40097	0.579903
C09H10.3	nuo-1	5713.71	5506.3	4065.03	4415.09	4313.49	4810.85	3008.47	3015.95	3051.96	2996.15	3182.44	3108.55	3061.87	3171.1	3172.05	3159.76	3115.13	2673.31	3549.37	3329.06	3431.35	4435.82	4654.77	5048.65		3749.59	-0.174725	0.885936	0.105199	-1.66091	0.0967319	0.145137		3749.59	0.0331344	1.02323	0.106205	0.311985	0.755052	0.817825		3749.59	-0.0716285	0.951563	0.106233	-0.674256	0.500148	0.668331
C09H10.8	glb-4	33.049	47.2418	41.5881	48.2048	52.1103	44.6631	85.8696	72.3175	63.8994	175.95	171.34	162.468	127.535	144.189	123.196	165.107	198.05	173.289	63.3231	32.7568	39.2286	47.4546	44.5994	55.1372		92.1903	0.246125	1.18602	0.208716	1.17924	0.238304	0.313537		92.1903	1.19844	2.29491	0.175682	6.82162	9.00212e-12	6.51088e-11		92.1903	0.443588	1.35998	0.163186	2.7183	0.00656176	0.0323081
C09H6.2	lin-10	1701.55	2342.85	3033.49	2161.31	2300.63	2218.8	2128.56	2374.26	2049.85	1454.59	1334.7	1559.69	4087.26	4652.99	3600.64	3333.77	2818.98	3833.5	1273.01	1116.16	1224.16	1566	1381.41	1287.33		2284.81	-0.0837021	0.943633	0.160672	-0.52095	0.602402	0.677747		2284.81	-0.591417	0.663691	0.161573	-3.66038	0.000251846	0.00075914		2284.81	-0.305573	0.809121	0.16029	-1.90638	0.0566014	0.151575
C09H6.3	mau-2	1455.1	1394.51	1217.47	772.067	732.656	701.051	869.809	813.827	830.692	837.763	780.764	860.586	896.829	931.439	757.812	776.1	799.604	694.214	1275.2	1931.44	1731.83	3391.82	3415.38	3404.12		1303	-0.88233	0.542491	0.124255	-7.10094	1.23908e-12	3.77782e-11		1303	-0.0204042	0.985956	0.126148	-0.161748	0.871504	0.911135		1303	-0.187585	0.878074	0.12644	-1.48359	0.137919	0.282215
C10A4.2	C10A4.2	0.944258	0	0	0	0	1.59511	0	2.03711	1.01428	3.99887	2.92056	3.93861	11.2231	6.31484	4.14105	7.9093	11.1056	7.3965	102.627	54.5947	59.9967	231.341	192.482	273.289		40.7862	0.743461	1.67419	1.57755	0.471275	0.637444	0.706488		40.7862	1.83345	3.56387	0.971412	1.8874	0.0591064	0.104143		40.7862	0.290756	1.22328	0.487136	0.596867	0.550596	0.708728
C10A4.3	C10A4.3	369.205	286.95	215.28	465.453	451.104	352.519	293.977	322.882	296.169	68.9805	69.12	86.6494	733.584	736.732	620.122	754.349	676.517	762.896	696.554	592.049	736.113	251.51	232.386	236.131		429.468	0.545476	1.4595	0.158664	3.43792	0.000586197	0.00161928		429.468	-2.02223	0.246177	0.182272	-11.0946	1.33213e-28	3.34665e-27		429.468	0.0693137	1.04922	0.154116	0.449751	0.65289	0.785623
C10A4.6	C10A4.6	1.88852	0	0	3.16097	2.3333	0	0	0	0	0	1.94704	0	2.04057	0	0	0.988662	0	3.16993	0	0	0	3.5591	0	0		0.795337	1.55761	2.94365	3.48472	0.446981	0.654888	NA		0.795337	1.80141	3.4856	3.64756	0.493866	0.621401	0.709304		0.795337	1.01741	2.02429	3.52389	0.288719	0.772797	NA
C10B5.3	C10B5.3	264.392	217.837	187.554	305.824	335.217	338.163	271.752	281.122	246.469	270.923	311.527	299.334	351.998	353.631	364.413	444.898	393.324	625.533	442.17	433.118	464.974	552.847	483.552	583.735		367.679	0.550708	1.4648	0.151203	3.64217	0.000270352	0.000811928		367.679	0.141809	1.10329	0.153044	0.926588	0.354141	0.460931		367.679	0.44999	1.36603	0.147916	3.04221	0.00234849	0.0149958
C10C5.1	pezo-1	1808.25	3142.46	5335.51	2904.93	3058.18	2661.44	4952.15	4734.25	4807.67	4541.71	4040.11	4619	2903.73	2980.61	3049.88	2358.95	1960.14	2276.01	2964.18	3546.23	3249.05	3782.14	3287.45	3684.6		3443.69	-0.254453	0.838305	0.2191	-1.16136	0.245497	0.321467		3443.69	-0.134839	0.910771	0.218947	-0.615854	0.537991	0.636975		3443.69	-0.438003	0.738155	0.219524	-1.99525	0.046016	0.130513
C10C5.6	daf-15	2873.38	4026.05	5081.9	2842.5	2868.4	2647.08	3676.23	3468.19	3567.21	5259.51	4621.31	5128.07	119.373	166.291	137.69	118.639	102.727	127.854	2928.15	3541.37	3317.13	6044.54	5802.62	6290.43		3114.86	-0.519817	0.69746	0.150402	-3.45618	0.000547891	0.00152305		3114.86	0.486628	1.40117	0.150352	3.23659	0.00120969	0.0032098		3114.86	-0.279326	0.823976	0.182411	-1.5313	0.125694	0.26403
C10C5.7	C10C5.7	5.66555	7.87364	4.07727	11.0634	8.55543	15.9511	30.3069	41.7608	39.5568	141.96	143.108	185.115	4.08113	5.26237	4.14105	13.8413	8.32921	5.28321	1.09178	7.27929	5.76891	173.209	123.235	176.199		48.4465	1.01904	2.02657	0.43453	2.34516	0.019019	0.0352326		48.4465	2.0749	4.21316	0.248733	8.34189	7.31096e-17	8.5074e-16		48.4465	1.03566	2.05005	0.522635	1.98162	0.047522	0.133277
C10C6.1	kin-4	2401.25	3390.91	4887.83	2366.78	2416.52	2104.75	5767.41	5333.16	5442.6	4692.67	4118	4622.94	4567.81	4538.27	5305.72	3579.95	2893.94	3428.81	3551.55	5317.52	4005.93	3127.26	3032.76	3287.85		3924.26	-0.632987	0.64484	0.181908	-3.47971	0.000501961	0.00141122		3924.26	-0.300398	0.812028	0.181553	-1.6546	0.0980056	0.15977		3924.26	-0.541422	0.687093	0.181766	-2.97868	0.00289497	0.0176802
C10C6.2	npr-3	50.0457	37.6185	37.5108	60.8487	68.4434	63.8044	23.2353	27.501	23.3283	34.9901	44.782	49.2326	37.7505	43.1514	54.8689	55.3651	51.8262	79.2482	29.478	25.4775	27.6908	69.9956	72.7675	58.7331		46.9872	0.63155	1.54923	0.215954	2.92447	0.00345044	0.00783034		46.9872	0.80172	1.74318	0.260598	3.07646	0.00209472	0.00530639		46.9872	0.451142	1.36712	0.224683	2.00791	0.0446531	0.127992
C10C6.6	catp-8	3088.67	3740.85	3552.93	3082.74	2816.29	2553.77	4784.45	4604.89	4609.88	7506.88	7529.22	7543.42	7277.68	7545.18	7481.85	6753.55	6008.14	5842.18	2972.91	3472.22	3291.74	3064.38	3339.09	3027.75		4812.11	-0.296844	0.814031	0.089501	-3.31666	0.000911018	0.00240577		4812.11	0.689664	1.61291	0.0887805	7.76819	7.96126e-15	7.76376e-14		4812.11	-0.261712	0.834097	0.0885874	-2.95428	0.00313395	0.0188244
C10C6.7	C10C6.7	110.478	94.4837	41.5881	78.234	62.999	70.1848	54.5525	60.0948	62.8851	52.985	34.0733	44.3093	56.1156	56.8336	59.01	74.1497	57.379	51.7755	55.6807	65.5136	69.227	160.159	156.098	190.583		75.808	-0.214655	0.861752	0.244655	-0.877379	0.380281	0.463831		75.808	-0.435542	0.739416	0.26865	-1.62122	0.10497	0.168874		75.808	0.0932124	1.06674	0.261557	0.356375	0.72156	0.83717
C10E2.3	hda-4	1125.56	1501.24	2566.23	1962.96	2089.08	1947.63	2816.52	2813.25	2715.22	3550.99	3495.92	3649.12	2413.99	2782.74	2767.26	3054.97	2229.45	3296.73	1043.74	792.229	894.182	1353.64	1453	1462.33		2240.75	0.207794	1.15492	0.197968	1.04964	0.293884	0.374437		2240.75	0.358092	1.28173	0.197511	1.81302	0.0698287	0.120013		2240.75	0.107548	1.0774	0.197678	0.544054	0.586404	0.736617
C10E2.5	C10E2.5	45.3244	20.1215	18.7554	22.1268	24.8885	24.7242	13.133	15.2783	11.157	37.9892	33.0997	32.4935	31.6288	24.2069	22.7758	33.6145	41.6461	41.2091	38.2122	30.3304	40.3824	22.541	41.0784	41.9522		29.5279	-0.214812	0.861658	0.304958	-0.704399	0.481184	0.564594		29.5279	1.38815	2.61743	0.348412	3.98423	6.76987e-05	0.000224882		29.5279	0.566185	1.4806	0.305433	1.85372	0.0637797	0.165215
C10F3.1	cpg-4	704.417	666.635	479.486	273.424	278.44	256.015	618.261	460.388	720.136	397.887	328.077	404.692	161.205	155.766	149.078	145.333	132.342	125.74	120.096	183.195	134.993	41.5228	59.8571	58.7331		293.988	-1.19484	0.436834	0.176668	-6.76322	1.34955e-11	3.05146e-10		293.988	-0.67003	0.628493	0.176581	-3.79446	0.000147963	0.000465422		293.988	-0.207844	0.86583	0.194736	-1.06731	0.28583	0.464288
C10F3.3	acy-2	55.7112	57.74	83.9917	63.2194	86.332	74.1726	140.422	139.542	117.656	131.963	165.499	139.821	364.241	405.202	393.4	388.544	381.293	376.165	136.472	92.2043	96.9178	166.091	176.05	188.186		184.202	0.17291	1.12733	0.180617	0.957328	0.338402	0.420683		184.202	0.137696	1.10015	0.16156	0.852288	0.394054	0.500487		184.202	-0.0208205	0.985672	0.140545	-0.148141	0.882232	0.936833
C10F3.4	mcp-1	694.03	664.01	583.864	629.824	560.769	552.705	453.594	447.146	438.167	489.861	514.019	532.697	440.762	429.409	460.692	480.49	509.933	516.698	558.99	630.872	571.122	844.693	847.389	889.387		572.547	-0.154183	0.898641	0.0869333	-1.77358	0.0761329	0.118212		572.547	0.198763	1.14771	0.092665	2.14496	0.0319559	0.0608558		572.547	0.17921	1.13226	0.0930648	1.92565	0.0541482	0.14643
C10F3.5	pcm-1	1197.32	828.482	515.366	915.101	743.544	775.223	217.2	209.823	251.54	208.941	209.307	199.884	198.955	182.078	184.277	235.302	244.324	239.858	286.046	300.877	252.678	499.46	507.025	443.495		410.254	-0.0611283	0.958514	0.190436	-0.320991	0.748217	0.799805		410.254	-0.13458	0.910935	0.203231	-0.6622	0.507843	0.609363		410.254	0.347882	1.27269	0.203836	1.70667	0.0878825	0.206456
C10F3.6	fut-8	369.205	447.923	569.186	798.936	779.322	781.604	572.801	583.633	517.281	311.912	364.097	304.257	1684.49	1538.72	1550.82	1915.04	1950.89	2168.23	568.816	387.016	419.977	340.487	308.675	248.117		811.726	0.765733	1.70023	0.150714	5.08071	3.76022e-07	2.26863e-06		811.726	-0.771643	0.58575	0.155104	-4.97499	6.52506e-07	2.81602e-06		811.726	0.337805	1.26383	0.146615	2.30403	0.021221	0.0754112
C10G11.5	pnk-1	1463.6	1524.86	1179.96	1227.25	1212.54	1149.28	1248.65	1234.49	1306.39	2742.22	2966.32	2749.15	1599.8	1699.74	1680.23	1422.69	1443.73	1117.93	1354.9	1453.43	1422.61	2353.75	2396.63	2515.93		1686.09	-0.215275	0.861382	0.101282	-2.12549	0.0335458	0.057672		1686.09	1.15827	2.23189	0.100807	11.4899	1.48203e-30	4.1645e-29		1686.09	-0.320919	0.80056	0.101549	-3.16024	0.0015764	0.0111237
C10G11.6	C10G11.6	174.688	216.088	238.112	131.971	157.886	137.179	26355.9	28381.1	28059.9	24904	22797.9	22068	626.454	605.172	596.311	448.853	415.535	550.511	821.017	1293.29	916.104	606.233	588.008	556.166		6735.27	-0.560644	0.677999	0.161151	-3.479	0.000503293	0.0014139		6735.27	-0.246974	0.842662	0.138864	-1.77854	0.075316	0.127692		6735.27	-0.370752	0.773379	0.147869	-2.5073	0.0121658	0.0498576
C10G11.8	C10G11.8	0	0	0	0	0	0.797555	0	0	0	0	0	0	1.02028	2.10495	3.10579	2.96599	0.925468	2.11329	34.9369	32.7568	32.3059	20.1682	16.4314	15.5823		6.88395	0.808928	1.75191	1.6955	0.477103	0.633289	0.703454		6.88395	0	1	1.69549	0	1	1		6.88395	-0.0670468	0.95459	0.890371	-0.0753021	0.939974	NA
C10G6.1	egal-1	1477.76	1581.73	1804.6	2371.52	2383.85	2253.89	4026.78	4458.22	3672.69	2898.18	2893.31	2931.31	2560.91	2825.89	2403.88	2546.79	2147.09	2197.82	3893.28	3074.29	3561.73	3833.15	3459.98	3748.13		2875.28	0.526647	1.44058	0.10669	4.93621	7.96541e-07	4.40789e-06		2875.28	-0.479001	0.717474	0.105745	-4.52977	5.90491e-06	2.27761e-05		2875.28	-0.176883	0.884612	0.106531	-1.66038	0.0968382	0.220395
C10G8.5	ncx-2	1133.11	1564.23	2871.21	2144.72	2227.52	2230.76	3456	3777.83	3159.47	2346.34	2039.53	2520.71	5025.92	5580.22	5389.58	5926.04	4731.92	6113.74	4988.33	3365.46	3609.03	4380.06	3860.2	4683.07		3630.21	0.245382	1.18541	0.220655	1.11206	0.266113	0.3444		3630.21	-0.589619	0.664518	0.220482	-2.67423	0.00749018	0.016898		3630.21	0.0683081	1.04849	0.219931	0.310588	0.756114	0.859972
C10G8.6	ceh-34	1044.35	978.956	1132.66	1270.71	1399.98	1289.65	2334.64	2448.61	2345.01	1812.49	1754.29	1731.02	2563.97	2584.88	2329.34	2486.49	2358.09	2875.13	2660.66	2393.67	2809.46	1856.66	1704.17	1624.15		1991.21	0.327226	1.2546	0.0927468	3.52816	0.000418456	0.00120328		1991.21	-0.428173	0.743202	0.0910625	-4.70197	2.57658e-06	1.03926e-05		1991.21	0.0454412	1.032	0.0903559	0.502913	0.615025	0.757306
C10G8.7	ceh-33	28.3277	23.6209	34.249	56.8975	50.5548	43.8655	35.3581	38.7052	40.571	45.987	53.5437	33.4782	14.284	22.1019	20.7053	22.7392	28.6895	21.1329	30.5698	14.5586	25.3832	40.3365	30.5154	44.3495		33.3552	0.808105	1.75091	0.252888	3.19551	0.00139584	0.00351275		33.3552	0.214998	1.1607	0.256606	0.837852	0.402114	0.508219		33.3552	0.354414	1.27847	0.313135	1.13183	0.257708	0.434498
C10H11.1	viln-1	2004.66	2170.5	2280.01	2377.05	2418.85	2520.27	1949.75	2048.32	1811.5	1379.61	1332.75	1343.07	3036.36	3352.13	3509.54	3579.95	3286.34	3311.52	1947.73	1563.83	1543.76	1074.85	991.75	994.867		2159.54	0.18032	1.13314	0.0916063	1.96842	0.0490192	0.0802495		2159.54	-0.518593	0.698053	0.0935617	-5.54279	2.97695e-08	1.53126e-07		2159.54	0.0402392	1.02828	0.0911301	0.441558	0.658809	0.790267
C10H11.10	kca-1	282.333	230.085	131.288	120.117	120.554	118.836	304.079	256.676	354.997	262.926	234.619	279.641	662.164	665.163	1132.58	415.238	575.641	416.317	895.258	1776.15	1047.63	147.109	97.4145	113.87		443.362	-0.838461	0.55924	0.273725	-3.06315	0.00219021	0.00526939		443.362	-0.236764	0.848647	0.269191	-0.879539	0.379109	0.486354		443.362	-0.805338	0.572228	0.264308	-3.04697	0.00231157	0.0148451
C10H11.8	mlst-8	736.521	705.128	538.199	574.507	621.435	527.184	822.328	781.233	794.178	815.769	868.381	834.985	1270.25	1212.45	1177.09	1446.41	1576.07	1474.02	752.235	674.548	781.111	943.161	1043.39	1016.44		916.126	-0.198455	0.871483	0.105487	-1.88132	0.0599286	0.0957493		916.126	0.0712969	1.05066	0.104626	0.681448	0.495588	0.597493		916.126	0.297194	1.22875	0.101483	2.92851	0.00340589	0.0200512
C10H11.9	let-502	4392.69	5417.94	6669.59	5173.72	5046.15	4309.19	5256.23	5239.46	5095.72	3327.06	2889.41	3170.58	5913.56	5907.53	6100.8	4640.78	4197.92	4851.05	6368.34	7888.32	6844.24	6042.16	6401.19	5579.64		5280.14	-0.18199	0.881486	0.124888	-1.45723	0.145054	0.206062		5280.14	-0.732032	0.602055	0.125408	-5.83719	5.30879e-09	2.99241e-08		5280.14	-0.388715	0.76381	0.125076	-3.10782	0.00188471	0.0127489
C11D2.2	asp-9	18.8852	9.62334	14.6782	13.4341	17.1109	19.1413	0	0	1.01428	0	0.973522	0.984652	2.04057	0	2.07053	0	0.925468	0	13.1013	8.4925	5.76891	36.7774	41.0784	21.5754		9.4865	0.207077	1.15435	0.418085	0.495299	0.620389	0.693162		9.4865	0.854388	1.80799	1.58994	0.537371	0.591011	0.682185		9.4865	-1.962	0.256673	1.41691	-1.3847	0.166144	0.323763
C11D2.4	C11D2.4	974.475	907.218	537.384	578.458	512.548	512.828	512.187	512.334	571.037	544.846	548.093	593.745	654.002	647.271	590.1	582.322	699.654	496.622	589.56	890.5	581.507	378.451	424.868	388.358		592.849	-0.592105	0.663374	0.185162	-3.19777	0.00138495	0.00349006		592.849	0.0801338	1.05712	0.187205	0.428055	0.668611	0.746982		592.849	-0.0879722	0.940844	0.186558	-0.471555	0.637245	0.773562
C11E4.3	del-8	15.1081	18.3718	13.8627	25.2878	34.2217	27.1169	21.2148	18.334	20.2855	41.9881	44.782	50.2172	44.8925	56.8336	41.4105	72.1724	70.3356	66.5685	30.5698	25.4775	19.6143	65.2501	46.9468	52.7399		38.4834	0.874818	1.83378	0.281295	3.10997	0.00187107	0.00457408		38.4834	1.19506	2.28954	0.268135	4.45693	8.31423e-06	3.13364e-05		38.4834	0.548584	1.46265	0.215764	2.54252	0.0110057	0.0464497
C11E4.6	C11E4.6	964.088	1256.28	2369.71	1842.85	2124.86	2144.62	2941.79	3189.1	2875.47	1955.45	1948.02	1917.12	2560.91	2838.52	2651.31	3174.59	2084.15	2955.43	3359.4	2451.91	2719.47	2923.21	2983.47	3100.87		2472.19	0.412663	1.33114	0.216321	1.90764	0.0564378	0.0908746		2472.19	-0.629781	0.646275	0.216137	-2.9138	0.00357057	0.00864663		2472.19	0.0288965	1.02023	0.215979	0.133793	0.893566	0.942712
C11G10.1	C11G10.1	19.8294	21.8712	21.2018	87.717	63.7768	94.1114	52.532	62.132	56.7995	253.928	255.063	243.209	15.3043	19.997	30.0226	69.2064	38.8697	48.6056	85.1587	98.2704	51.9202	416.415	400.221	441.098		122.802	1.96284	3.8983	0.254121	7.72404	1.12695e-14	6.11927e-13		122.802	2.13337	4.3874	0.209708	10.1731	2.61579e-24	5.08871e-23		122.802	1.26035	2.39554	0.27409	4.5983	4.25954e-06	0.000115612
C11H1.3	C11H1.3	1433.38	1488.12	1504.51	1265.18	1134.76	1206.7	2090.17	2225.55	2028.55	2044.42	2063.87	2023.46	2096.68	2170.2	1863.47	1873.52	1952.74	1965.36	1943.36	1874.42	1979.89	3915.01	3985.78	3943.51		2086.36	-0.295746	0.814651	0.0682829	-4.33118	1.48312e-05	5.9994e-05		2086.36	-0.0491282	0.96652	0.0668006	-0.735446	0.462068	0.56678		2086.36	-0.0819947	0.94475	0.0670994	-1.22199	0.221712	0.393076
C11H1.7	C11H1.7	663.814	552.03	320.473	981.482	769.988	810.316	190.934	205.748	153.156	182.948	243.38	199.884	184.671	170.501	102.491	144.345	165.659	162.723	182.327	105.55	214.604	202.869	269.944	188.186		307.001	0.738559	1.66851	0.248596	2.97092	0.00296914	0.00689155		307.001	0.187845	1.13906	0.259009	0.725244	0.468302	0.573066		307.001	0.0467137	1.03291	0.262752	0.177786	0.858891	0.921576
C11H1.9	C11H1.9	884.77	807.486	874.166	1118.19	1137.09	1158.05	2262.92	2550.47	2248.65	1542.56	1679.32	1293.83	1910.99	1870.25	1838.63	2703.99	2339.58	2860.33	2286.18	1793.13	2019.12	5644.73	5726.33	5852.93		2266.82	0.411487	1.33006	0.107405	3.83116	0.000127542	0.000413234		2266.82	-0.645078	0.639458	0.10534	-6.12376	9.13943e-10	5.57402e-09		2266.82	0.491719	1.40612	0.104822	4.691	2.71879e-06	7.99413e-05
C12C8.2	cbl-1	227.566	230.085	193.262	541.316	549.881	534.362	352.571	389.089	307.326	103.971	136.293	110.281	758.071	789.355	688.45	691.075	911.586	765.009	438.895	320.289	403.824	102.027	146.709	92.2949		407.649	1.32162	2.49947	0.153413	8.61479	7.00684e-18	6.94985e-16		407.649	-1.58065	0.334331	0.166078	-9.51754	1.77329e-21	2.89332e-20		407.649	0.0831293	1.05931	0.146807	0.566251	0.571223	0.72542
C12C8.3	lin-41	341.822	508.287	718.414	208.624	216.219	227.303	578.862	529.649	622.765	1503.57	1276.29	1586.27	1317.19	1247.18	1417.27	1042.05	819.039	1262.69	1926.99	3001.49	1918.74	824.525	772.274	883.394		1031.29	-1.2675	0.415379	0.213454	-5.93805	2.88441e-09	3.21696e-08		1031.29	1.33449	2.52186	0.208738	6.39315	1.62504e-10	1.05378e-09		1031.29	-0.350497	0.784314	0.207565	-1.68861	0.0912939	0.211741
C12D12.1	C12D12.1	633.597	725.25	1266.4	960.935	1185.32	1180.38	3155.96	3485.5	3228.44	2148.39	2129.09	2102.23	1865.08	2138.63	1977.35	2572.5	1773.2	2604.62	3093.01	2305.11	2473.71	1039.26	1077.43	1199.83		1930.05	0.340696	1.26637	0.194155	1.75477	0.0792992	0.122514		1930.05	-0.629543	0.646381	0.192465	-3.27095	0.00107185	0.00287965		1930.05	0.216518	1.16193	0.19278	1.12314	0.261379	0.437251
C12D12.2	glt-1	111.422	129.478	289.486	112.214	151.664	136.382	164.668	130.375	152.141	778.78	699.962	893.079	446.884	486.243	599.417	660.426	687.623	760.783	388.673	211.099	250.371	1157.89	1154.89	1276.55		492.938	-0.409575	0.752845	0.259595	-1.57775	0.114624	0.168017		492.938	2.40698	5.30362	0.255811	9.40919	4.99953e-21	7.86959e-20		492.938	0.46043	1.37595	0.249474	1.8456	0.0649501	0.166768
C12D12.5	sox-4	172.799	146.1	141.889	273.424	268.329	265.586	401.062	409.46	377.311	218.938	243.38	216.623	269.355	284.168	261.922	320.327	275.789	418.431	199.795	120.108	131.531	176.769	203.045	182.192		249.097	0.811142	1.7546	0.160455	5.05526	4.29811e-07	2.53961e-06		249.097	-0.806812	0.571644	0.156666	-5.14988	2.6065e-07	1.18772e-06		249.097	0.312963	1.24226	0.156278	2.0026	0.0452204	0.129092
C12D8.1	fubl-1	5193.42	5535.17	5302.89	3979.66	3895.83	3701.45	6123.01	6359.87	6479.19	6245.23	6029.99	5734.61	7489.9	7846.19	6841.02	5814.32	6431.08	8127.7	1604.91	2118.27	2186.42	2757.12	2972.9	2834.77		5066.87	-0.469662	0.722134	0.116462	-4.03275	5.51274e-05	0.000194818		5066.87	-0.0743348	0.94978	0.116331	-0.638995	0.522826	0.623202		5066.87	-0.122522	0.918581	0.116215	-1.05427	0.291761	0.470364
C12D8.11	rop-1	922.54	918.591	693.135	772.067	753.655	811.911	1443.62	1352.64	1468.67	4528.72	4369.16	4404.35	664.205	715.682	684.309	793.896	774.617	866.447	2847.36	3193.18	3074.83	5409.83	5334.33	5960.81		2198.27	-0.115202	0.923253	0.0988671	-1.16522	0.243932	0.319699		2198.27	1.64105	3.11893	0.0948702	17.2979	4.88213e-67	5.217e-65		2198.27	0.23782	1.17921	0.101203	2.34992	0.0187773	0.0690142
C12D8.5	daf-36	58.544	26.2455	26.0945	57.6877	70.7767	59.019	59.6036	75.3732	68.9708	35.9898	32.1262	34.4628	108.15	104.195	95.2442	105.787	123.087	80.3049	128.83	107.976	139.608	176.769	188.961	182.192		89.4166	0.775127	1.71134	0.232513	3.33369	0.000857008	0.00227607		89.4166	-0.991689	0.502889	0.242957	-4.08175	4.46987e-05	0.00015283		89.4166	0.01154	1.00803	0.205707	0.0560993	0.955263	0.979991
C12D8.9	C12D8.9	0.944258	0	0	0	0.777766	0	0	0	1.01428	2.99915	4.86761	0.984652	0	0	0	0	0	0	0	0	0	1.18637	0	2.39727		0.632139	-0.152867	0.899461	2.27751	-0.0671203	0.946486	NA		0.632139	3.0218	8.12179	2.00778	1.50504	0.132313	0.205329		0.632139	0	1	2.27751	0	1	NA
C13A10.1	C13A10.1	16.0524	19.2467	30.1718	22.1268	13.9998	19.9389	34.3478	31.5753	37.5282	47.9864	75.9347	68.9256	170.387	184.183	206.017	237.279	233.218	265.217	70.9655	37.6097	40.3824	91.3502	56.3361	79.1099		87.0787	-0.238924	0.847377	0.303197	-0.788015	0.430688	0.514103		87.0787	0.899488	1.8654	0.257055	3.49921	0.000466641	0.00134667		87.0787	0.391719	1.31196	0.20417	1.91859	0.0550365	0.148255
C13A10.2	C13A10.2	74.5964	60.3646	45.6654	82.1853	59.888	96.5041	6.06138	19.3526	12.1713	55.9842	57.4378	52.1866	19.3854	6.31484	9.31737	21.7506	14.8075	19.0196	74.2409	50.955	68.0732	209.987	207.739	221.747		64.4056	0.406607	1.32556	0.234512	1.73384	0.0829466	0.127514		64.4056	2.14115	4.41114	0.326479	6.55831	5.44219e-11	3.67348e-10		64.4056	0.655291	1.57493	0.36933	1.77427	0.0760183	0.186157
C13B4.1	C13B4.1	474.018	645.638	715.968	417.248	402.883	374.053	593.005	591.781	692.75	520.853	499.417	523.835	784.598	757.781	813.717	884.853	724.641	859.051	1785.06	1874.42	1375.31	2061.9	2087.96	2068.84		938.732	-0.621686	0.649911	0.13835	-4.49357	7.00396e-06	3.08664e-05		938.732	-0.282107	0.822389	0.138657	-2.03457	0.0418941	0.0770753		938.732	0.0667712	1.04737	0.136097	0.490616	0.623698	0.763601
C13B4.2	usp-14	5394.55	4824.79	3291.98	2405.5	2309.97	2166.16	3013.52	2746.03	3036.74	2598.26	2414.33	2415.35	1771.21	1730.27	2283.79	1280.32	1412.26	1335.6	1792.7	3002.71	2311.03	2385.78	2533.95	2352.92		2533.74	-0.973185	0.50938	0.167248	-5.8188	5.92721e-09	5.95845e-08		2533.74	-0.243944	0.844434	0.167674	-1.45487	0.145705	0.222337		2533.74	-0.5222	0.696309	0.168768	-3.09419	0.00197351	0.013239
C13B9.3	copd-1	3138.71	3187.95	2830.44	2930.22	2956.29	2920.65	4984.48	5415.67	5258.01	4388.76	4386.69	4172.95	3912.79	4113.07	3698.99	3683.76	3354.82	3400.28	3708.77	4423.38	4102.85	4516.5	4809.7	4825.7		3963.39	-0.0559692	0.961948	0.0754973	-0.74134	0.458487	0.541379		3963.39	-0.274134	0.826947	0.0748814	-3.66091	0.000251323	0.000758165		3963.39	-0.167604	0.89032	0.0754667	-2.2209	0.0263577	0.0870595
C13C12.1	cal-1	152.97	119.854	101.932	240.234	202.997	239.266	200.026	194.544	202.855	512.855	497.47	479.525	123.454	112.615	113.879	174.005	198.05	133.137	621.222	410.067	520.356	624.029	546.93	580.139		304.267	0.869391	1.82689	0.166	5.23729	1.62955e-07	1.08407e-06		304.267	1.31829	2.49371	0.158666	8.30864	9.68044e-17	1.11281e-15		304.267	0.532951	1.44689	0.174615	3.05216	0.00227204	0.0147007
C13C12.2	C13C12.2	503.29	503.913	502.319	788.662	783.21	885.286	926.382	1080.69	804.321	229.935	270.639	281.61	936.62	885.13	877.903	1018.32	950.456	891.807	1172.57	879.581	1044.17	844.693	920.156	851.031		784.696	0.702841	1.62771	0.118604	5.92597	3.10452e-09	3.44181e-08		784.696	-1.84534	0.278289	0.12475	-14.7923	1.64199e-49	1.04687e-47		784.696	0.0837014	1.05973	0.117079	0.714911	0.474664	0.646479
C13C4.3	nhr-136	280.445	218.712	190.816	429.892	302.551	343.746	349.54	365.662	318.483	266.924	296.924	308.196	113.251	147.346	114.914	132.481	188.795	159.553	253.292	191.688	229.603	277.61	288.723	273.289		251.768	0.64384	1.56248	0.163475	3.93846	8.20057e-05	0.000279323		251.768	-0.245184	0.843708	0.164141	-1.49374	0.135244	0.209024		251.768	0.358937	1.28248	0.180472	1.98888	0.0467145	0.131675
C13C4.4	C13C4.4	753.518	542.406	344.937	484.419	432.438	425.894	458.645	462.425	422.953	519.853	561.722	546.482	148.961	144.189	198.77	194.766	280.417	248.311	401.774	458.595	554.97	1030.95	1065.69	978.086		485.882	-0.287762	0.819172	0.198186	-1.45198	0.146507	0.207752		485.882	0.276627	1.21136	0.199429	1.38709	0.165413	0.246851		485.882	0.557038	1.47125	0.210167	2.65045	0.00803855	0.037076
C13C4.5	spin-1	309.717	332.443	377.555	540.526	584.102	524.791	704.131	705.86	565.966	333.905	342.68	314.104	571.359	612.54	618.052	681.188	574.716	459.64	345.002	253.562	316.136	301.337	271.118	268.494		454.538	0.692622	1.61622	0.138918	4.98582	6.17006e-07	3.49841e-06		454.538	-0.996021	0.501381	0.140191	-7.10476	1.2053e-12	9.5356e-12		454.538	-0.0699954	0.952641	0.137516	-0.508999	0.610753	0.754243
C13C4.6	C13C4.6	75.5407	63.864	39.9572	37.1414	34.2217	25.5217	11.1125	9.16701	14.1999	0	0	0.984652	10.2028	4.20989	10.3526	11.8639	10.1801	13.7364	8.73422	3.63964	3.46135	61.691	51.6414	68.3222		23.7394	-0.882341	0.542486	0.286613	-3.07851	0.00208038	0.0050312		23.7394	-5.02426	0.0307289	1.22628	-4.09716	4.18258e-05	0.000143719		23.7394	0.520206	1.43416	0.446707	1.16454	0.244207	0.419693
C13D9.1	srr-6	16.0524	15.7473	17.1245	37.1414	55.2214	52.6386	6.06138	13.2412	9.12848	28.9918	39.9144	31.5089	12.2434	3.15742	9.31737	26.6939	20.3603	22.1895	0	1.21321	3.46135	74.7411	44.5994	61.1304		25.0783	1.56628	2.96139	0.30893	5.07	3.97813e-07	2.37697e-06		25.0783	1.82252	3.53697	0.376321	4.84298	1.27907e-06	5.35264e-06		25.0783	1.47818	2.78597	0.404299	3.65616	0.000256019	0.00277811
C13F10.2	kxd-1	1803.53	1289.53	607.513	1130.84	850.098	992.956	1538.58	1391.35	1515.33	1166.67	1287	1173.71	404.032	369.418	325.073	340.1	468.287	414.204	177.96	279.039	265.37	143.55	173.703	130.651		759.937	-0.314866	0.803926	0.24734	-1.27301	0.203015	0.274139		759.937	-0.293336	0.816013	0.247329	-1.18601	0.235617	0.330907		759.937	0.154552	1.11308	0.252545	0.611976	0.540554	0.702373
C13F10.4	soap-1	2268.11	3364.67	4621.17	2599.11	2722.96	2391.07	2422.53	2369.16	2299.36	2069.41	1878.9	2025.43	2504.8	2710.12	2799.35	2231.41	1862.97	1982.26	1410.58	1726.4	1492.99	1525.67	1663.09	1573.81		2271.47	-0.411101	0.752049	0.163601	-2.51283	0.0119767	0.0234954		2271.47	-0.247383	0.842423	0.164364	-1.50509	0.1323	0.205329		2271.47	-0.39933	0.75821	0.164263	-2.43103	0.0150559	0.0584286
C13F10.6	C13F10.6	2401.25	2202.87	1467	1201.96	1116.09	1034.43	693.018	580.577	755.636	531.849	502.337	546.482	842.754	818.825	884.115	782.032	908.81	770.293	755.51	1108.88	869.952	444.887	383.79	439.899		918.469	-0.856337	0.552353	0.159436	-5.37104	7.82819e-08	5.73169e-07		918.469	-0.360455	0.778919	0.164219	-2.19497	0.0281658	0.0544305		918.469	-0.048411	0.967001	0.162214	-0.298439	0.765368	0.865771
C13F10.7	C13F10.7	8400.12	5478.3	2966.62	4236.49	3343.62	3592.19	808.185	697.711	788.092	554.843	595.795	548.451	676.448	644.114	632.546	673.279	814.412	633.986	923.644	1711.85	1400.69	823.338	855.605	813.873		1775.59	-0.592274	0.663297	0.241065	-2.4569	0.0140141	0.0269522		1775.59	-0.433088	0.740675	0.244919	-1.76829	0.0770122	0.130277		1775.59	0.119683	1.0865	0.244811	0.488878	0.624928	0.764336
C13G3.2	hot-6	303.107	237.959	154.936	595.053	458.104	496.877	463.696	460.388	405.71	408.884	448.793	366.291	325.47	306.27	281.592	424.136	460.883	365.598	121.187	64.3004	116.532	85.4184	103.283	105.48		314.998	1.158	2.23148	0.197966	5.84949	4.93084e-09	5.1087e-08		314.998	-0.119592	0.920448	0.19689	-0.607406	0.543581	0.641691		314.998	0.453998	1.36983	0.198769	2.28405	0.0223685	0.0778841
C13G5.1	ceh-16	723.302	574.776	520.259	581.619	578.658	469.76	659.681	721.138	688.693	293.917	319.315	340.69	236.706	242.069	191.524	214.54	198.05	209.215	54.5889	48.5286	47.3051	41.5228	28.1681	31.1645		333.966	-0.156247	0.897356	0.133698	-1.16866	0.242542	0.318101		333.966	-1.11721	0.460986	0.137963	-8.09784	5.59435e-16	6.02903e-15		333.966	-0.108769	0.927379	0.149642	-0.726865	0.467309	0.64023
C14A11.1	tsp-6	33.049	30.6197	74.2062	79.8145	73.11	86.1359	110.115	108.986	115.627	138.961	133.372	106.342	222.422	195.76	174.959	279.791	273.939	345.522	137.564	88.5647	103.84	169.65	167.835	200.172		143.765	0.78065	1.7179	0.235881	3.30951	0.000934596	0.00245844		143.765	0.177866	1.13121	0.217676	0.817113	0.413864	0.519436		143.765	0.599315	1.515	0.20392	2.93896	0.00329311	0.0195072
C14A11.2	C14A11.2	694.974	538.032	521.075	1093.7	1059.32	1010.5	802.123	864.755	800.264	640.819	718.459	654.794	612.17	550.444	479.327	579.356	682.995	594.89	573.183	425.838	507.664	1083.15	1100.9	1082.37		736.296	0.852282	1.80535	0.121702	7.00303	2.50493e-12	6.9272e-11		736.296	-0.292613	0.816422	0.122982	-2.37932	0.0173448	0.0355662		736.296	0.178272	1.13153	0.125188	1.42404	0.154434	0.307069
C14A11.5	C14A11.5	90.6488	57.74	109.271	128.81	94.1097	120.431	48.4911	49.9093	44.6281	59.983	73.9876	70.8949	134.677	150.504	136.655	140.39	136.969	177.516	542.614	384.589	459.206	411.669	458.905	442.296		188.537	0.411271	1.32986	0.193368	2.12688	0.0334298	0.0575003		188.537	0.518999	1.43296	0.224301	2.31385	0.020676	0.0414012		188.537	0.106787	1.07683	0.187575	0.569305	0.569149	0.723921
C14A11.6	C14A11.6	54.767	45.4921	65.2363	79.0243	68.4434	86.1359	194.975	243.435	203.869	229.935	208.334	221.547	434.641	360.998	395.47	466.649	459.032	528.321	192.153	160.144	189.22	646.57	629.087	536.988		279.186	0.492389	1.40677	0.174523	2.82134	0.00478235	0.0104237		279.186	0.0388103	1.02727	0.137258	0.282754	0.777365	0.836103		279.186	0.286561	1.21973	0.125177	2.28924	0.0220653	0.0770922
C14A11.7	ssr-2	120.865	95.3585	101.932	137.502	143.887	161.904	39.399	49.9093	41.5853	71.9796	55.4907	54.1559	30.6085	45.2564	44.5163	75.1383	58.3045	62.3419	161.583	126.174	136.146	85.4184	62.2045	100.685		85.9311	0.48063	1.39535	0.175809	2.73381	0.00626057	0.0131833		85.9311	0.471923	1.38696	0.221128	2.13416	0.0328293	0.0623938		85.9311	0.702367	1.62717	0.223405	3.14392	0.00166704	0.0115114
C14A4.10	taf-13	4064.09	2715.53	1530.61	2660.75	2192.52	2501.13	1035.49	890.218	1012.25	841.762	949.184	798.553	680.529	564.126	492.785	609.016	781.095	619.193	442.17	507.124	537.663	345.233	376.748	268.494		1142.34	-0.176007	0.885149	0.225389	-0.780906	0.434858	0.518498		1142.34	-0.182125	0.881404	0.227746	-0.799686	0.423893	0.529395		1142.34	0.209963	1.15666	0.229398	0.915278	0.360046	0.538886
C14A4.12	C14A4.12	231.343	279.952	381.632	364.302	474.437	385.219	1058.72	1065.41	936.177	746.789	777.844	795.599	849.896	963.013	1137.75	1015.36	981.922	965.772	731.491	630.872	693.423	925.366	834.479	1010.45		759.884	0.452093	1.36802	0.152054	2.97324	0.00294674	0.00685025		759.884	-0.399384	0.758182	0.145988	-2.73573	0.00622418	0.0143066		759.884	0.00613317	1.00426	0.14548	0.0421581	0.966373	0.985979
C14A4.13	C14A4.13	7.55407	3.4994	3.26181	12.6439	3.11106	11.1658	5.05115	5.09278	4.0571	3.99887	0.973522	7.87722	767.253	761.991	666.709	820.59	823.667	869.617	0	2.42643	2.30757	0	2.34734	1.19863		199.433	0.935915	1.9131	0.456157	2.05174	0.040195	0.0672842		199.433	-0.147831	0.902606	0.570708	-0.259032	0.795611	0.851142		199.433	0.194908	1.14465	0.136951	1.42319	0.15468	0.307087
C14A4.15	srv-2	118.977	83.9855	63.6053	146.985	135.331	149.94	26.266	20.3711	26.3712	15.9955	22.391	22.647	28.5679	37.8891	18.6347	17.7959	28.6895	24.3028	7.64244	2.42643	6.9227	3.5591	8.21568	2.39727		42.4962	0.702289	1.62708	0.240632	2.91852	0.003517	0.00796539		42.4962	-0.257487	0.836544	0.331265	-0.777286	0.43699	0.542714		42.4962	-0.260895	0.83457	0.318745	-0.818509	0.413066	0.591554
C14A4.2	dap-3	842.278	775.991	610.774	759.423	801.099	834.242	744.54	794.474	745.493	686.806	795.367	723.719	169.367	199.97	143.902	196.744	209.156	170.119	930.195	971.785	933.41	2052.41	2175.98	2006.51		803.074	0.104791	1.07534	0.114419	0.915853	0.359744	0.442995		803.074	-0.0503745	0.965686	0.115932	-0.434517	0.663913	0.743046		803.074	0.16955	1.12471	0.139129	1.21866	0.222974	0.3939
C14A4.4	crn-3	2517.39	2722.53	1926.92	1512.52	1378.98	1363.82	2064.91	1935.26	2067.09	1861.47	1784.47	1963.4	1525.32	1442.94	1510.45	1136.96	1131.85	1220.42	1146.37	1719.13	1412.23	936.043	1015.22	891.784		1591.14	-0.751811	0.593858	0.128588	-5.84665	5.01586e-09	5.168e-08		1591.14	-0.113231	0.924515	0.128872	-0.878633	0.3796	0.486902		1591.14	-0.360368	0.778966	0.130255	-2.76664	0.00566371	0.0289658
C14A4.5	crn-5	856.442	666.635	340.859	656.692	522.659	500.864	213.159	203.711	221.112	300.915	344.627	278.656	397.911	308.375	301.262	307.474	427.566	271.557	76.4244	80.0722	101.533	181.514	205.392	202.569		331.999	-0.148646	0.902097	0.231728	-0.641466	0.52122	0.602655		331.999	0.53474	1.44868	0.23931	2.23451	0.0254498	0.049829		331.999	-0.000429507	0.999702	0.236485	-0.00181621	0.998551	1
C14A4.6	C14A4.6	283.277	198.591	103.563	371.414	300.218	286.322	150.524	171.118	156.198	115.967	126.558	94.5266	111.211	101.037	90.0679	96.8889	139.746	83.4748	331.9	240.217	316.136	263.373	207.739	189.384		188.727	0.713665	1.63997	0.248843	2.86793	0.00413162	0.00910939		188.727	-0.503446	0.70542	0.259977	-1.9365	0.0528063	0.0945579		188.727	0.0854355	1.06101	0.265772	0.321461	0.747861	0.854096
C14A4.8	C14A4.8	2.83277	6.12394	3.26181	2.37073	4.6666	3.98777	1.01023	1.01856	4.0571	2.99915	0.973522	0.984652	0	0	2.07053	0.988662	0	0	0	0	0	0	2.34734	2.39727		1.75378	-0.149471	0.901581	0.847323	-0.176404	0.859977	NA		1.75378	-0.301387	0.811472	1.08738	-0.277168	0.781651	0.839522		1.75378	-0.962868	0.513036	1.68771	-0.570519	0.568326	NA
C14A4.9	C14A4.9	2825.22	2041.9	1754.04	5608.35	4176.6	4692.01	1166.82	1305.79	1178.59	452.872	547.119	406.661	3545.48	3082.7	2867.68	4089.11	3549.17	3557.72	4451.18	3502.55	3424.43	679.788	800.442	632.879		2514.13	1.12894	2.18699	0.165468	6.82274	8.9322e-12	2.08704e-10		2514.13	-1.37598	0.385291	0.170374	-8.07626	6.67855e-16	7.10661e-15		2514.13	0.237595	1.17903	0.165533	1.43533	0.151193	0.302551
C14B1.1	pdi-1	10488.8	10563.8	8475	6801.62	7146.89	7562.41	12954.2	11521.9	12901.6	12077.6	13203.9	12753.2	8608.13	9414.38	12520.5	7349.72	7041.89	8261.89	3379.05	3751.26	3790.18	3623.16	3888.37	3876.38		8414.82	-0.45694	0.72853	0.121874	-3.7493	0.000177331	0.000554972		8414.82	0.0251398	1.01758	0.12176	0.20647	0.836423	0.883202		8414.82	-0.431166	0.741662	0.121969	-3.53503	0.000407724	0.00394963
C14B1.10	alkb-8	901.767	860.851	716.783	550.799	520.325	557.491	806.164	706.878	844.892	1031.71	1104.95	1021.08	2822.1	2785.9	2962.92	2190.88	2448.79	2352.09	453.088	588.409	507.664	533.865	537.54	508.221		1179.8	-0.605334	0.657319	0.10397	-5.82221	5.80731e-09	5.85374e-08		1179.8	0.421379	1.33921	0.103004	4.09091	4.29683e-05	0.000147245		1179.8	-0.293726	0.815792	0.098035	-2.99614	0.00273425	0.0169398
C14B1.2	C14B1.2	1685.5	1162.67	667.856	566.604	510.214	467.367	1105.19	873.922	1289.14	1069.7	1152.65	1090.01	409.134	357.841	515.561	315.383	540.473	369.825	188.878	319.076	206.527	46.2683	68.0728	64.7263		626.775	-1.18662	0.439331	0.261041	-4.54572	5.47487e-06	2.46834e-05		626.775	0.0193354	1.01349	0.260433	0.0742433	0.940817	0.96355		626.775	-0.064835	0.956055	0.264427	-0.245191	0.806309	0.89166
C14B1.8	C14B1.8	2246.39	1598.35	923.908	1416.12	1147.2	1081.48	530.371	484.833	571.037	354.9	474.105	408.631	477.493	368.366	426.528	428.091	464.585	459.64	286.046	388.229	305.752	278.796	276.986	243.323		651.715	-0.387239	0.764592	0.212519	-1.82214	0.0684338	0.107673		651.715	-0.357909	0.780295	0.21753	-1.64533	0.0999024	0.162443		651.715	0.0877768	1.06273	0.218057	0.402541	0.687286	0.812136
C14B1.9	C14B1.9	1846.97	1488.12	830.131	585.57	639.324	512.828	688.977	495.019	726.222	539.847	534.463	576.021	69.3793	42.0989	70.3979	40.5352	52.7517	60.2286	787.172	1563.83	913.796	128.128	129.104	112.672		559.733	-1.26081	0.41731	0.25512	-4.94202	7.73187e-07	4.29234e-06		559.733	-0.211002	0.863937	0.257005	-0.821003	0.411644	0.517248		559.733	-0.246918	0.842694	0.298292	-0.827773	0.407799	0.585945
C14B4.2	C14B4.2	347.487	538.032	1135.93	693.833	767.655	675.529	1069.83	1124.49	995.005	837.763	817.758	894.064	483.614	527.289	478.291	616.925	495.125	535.718	1566.7	1142.85	1309.54	978.752	825.089	970.894		826.174	0.079034	1.05631	0.247525	0.319297	0.749501	0.800853		826.174	-0.32299	0.799412	0.247112	-1.30706	0.191192	0.278689		826.174	0.145923	1.10644	0.249592	0.584646	0.558786	0.714864
C14B9.1	hsp-12.2	2620.32	2436.45	2573.57	3444.67	4031.94	3846.61	3523.68	3642.36	3777.16	2498.29	2795.95	2422.24	3450.6	3639.45	3281.78	4375.82	3626.91	3804.97	2677.04	2052.76	2061.81	1633.63	1645.48	1746.41		2983.75	0.569508	1.48402	0.104938	5.42707	5.72854e-08	4.33516e-07		2983.75	-0.503984	0.705157	0.105292	-4.78652	1.69694e-06	7.03921e-06		2983.75	0.187031	1.13842	0.104929	1.78246	0.0746748	0.183652
C14B9.2	C14B9.2	5094.27	5474.8	4900.06	6281.64	6288.24	6159.51	9694.17	10683.6	9463.19	6127.27	6198.41	6080.23	10042.6	11484.6	9996.5	8686.39	8318.11	9403.06	5253.63	5113.7	5797.76	8107.63	8491.49	7755.17		7537.34	0.275959	1.2108	0.0784298	3.51855	0.000433904	0.00124338		7537.34	-0.697121	0.616802	0.0782796	-8.90552	5.31345e-19	7.3031e-18		7537.34	-0.255565	0.837659	0.0780507	-3.27435	0.00105906	0.00826837
C14B9.3	C14B9.3	389.979	306.197	301.718	712.009	605.88	681.909	638.466	582.614	675.508	727.794	875.196	735.535	710.117	623.064	607.699	1003.49	769.064	1162.31	575.367	441.61	444.206	308.455	320.412	263.7		602.596	1.00425	2.0059	0.154215	6.51201	7.41532e-11	1.301e-09		602.596	0.302264	1.23308	0.152052	1.9879	0.0468228	0.0850538		602.596	0.595692	1.5112	0.151468	3.93279	8.39653e-05	0.00118428
C14B9.6	gei-8	2032.99	3145.08	4481.73	2560.39	2634.29	2227.57	4772.33	4786.2	4612.93	5025.58	4535.64	5102.47	4941.23	5327.62	4519.96	3434.61	2320.15	3396.05	1715.18	2437.35	2461.02	1653.79	1659.57	1569.01		3389.7	-0.380376	0.768237	0.201427	-1.8884	0.0589717	0.0944435		3389.7	0.049255	1.03473	0.201126	0.244896	0.806537	0.858515		3389.7	-0.692653	0.618715	0.20133	-3.44039	0.000580878	0.00513425
C14B9.7	rpl-21	18608.5	15259.1	12307.6	17131.7	20561	19622.2	13502.7	13860.5	13701.9	10217.1	11578.1	11013.3	13071.9	12140.3	10829.9	13042.4	11523	14150.6	14613.4	11443	13743.9	12819.9	13365.7	13373.2		13811.7	0.31186	1.24131	0.13082	2.38389	0.0171308	0.0321727		13811.7	-0.323836	0.798943	0.130995	-2.47214	0.0134308	0.0284318		13811.7	0.103205	1.07416	0.130991	0.78788	0.430767	0.608279
C14B9.8	C14B9.8	914.986	1181.05	1262.32	1068.41	1062.43	941.114	1912.37	1886.37	1915.97	1605.55	1544.98	1632.55	1236.58	1322.96	1309.61	1005.47	883.822	1062.98	1447.7	1594.16	1541.45	1268.23	1309.81	1215.42		1338.59	-0.12967	0.914041	0.102902	-1.26013	0.207623	0.279448		1338.59	-0.256759	0.836966	0.101535	-2.52876	0.0114465	0.0246718		1338.59	-0.390879	0.762665	0.103762	-3.76708	0.000165171	0.00197771
C14C10.2	C14C10.2	474.962	371.811	250.344	295.551	262.107	264.788	146.483	148.709	183.584	136.961	138.24	149.667	173.448	151.556	155.289	187.846	253.578	208.159	255.476	338.487	257.294	255.069	242.949	245.72		231.17	-0.413473	0.750814	0.179098	-2.30864	0.0209634	0.0384484		231.17	-0.172304	0.887424	0.194041	-0.887977	0.374553	0.482222		231.17	0.436554	1.35337	0.18992	2.29861	0.0215269	0.0760902
C14C10.3	ril-2	1733.66	1916.79	1758.93	1366.33	1210.98	1298.42	1991.16	2138.97	2048.84	4615.69	4852.03	4704.67	1789.58	1797.63	1873.83	1814.2	1890.73	1981.21	1024.09	1420.67	1178.01	699.956	670.165	714.386		1937.12	-0.481095	0.716433	0.0934437	-5.1485	2.62571e-07	1.64694e-06		1937.12	1.19767	2.29368	0.0919617	13.0235	8.98984e-39	3.53399e-37		1937.12	0.0581463	1.04113	0.0934224	0.622403	0.533677	0.69804
C14C10.4	mma-1	1251.14	1515.24	1553.44	1391.62	1427.98	1353.45	1491.1	1635.8	1517.36	1180.67	1208.14	1166.81	986.614	1079.84	885.15	923.411	933.797	1040.79	1467.35	1430.38	1409.92	1102.13	1153.72	1136.31		1260.09	-0.0506421	0.965507	0.0887914	-0.570349	0.568441	0.646976		1260.09	-0.385308	0.765615	0.0899981	-4.28129	1.8581e-05	6.68439e-05		1260.09	-0.0269074	0.981522	0.0922479	-0.291686	0.770527	0.869361
C14C10.5	C14C10.5	2094.36	3132.83	4544.52	1740.11	1757.75	1573.58	6872.6	6749.97	6727.69	6673.11	6078.67	6609.97	2781.29	2889.04	3663.8	2049.5	1656.59	1976.98	5274.38	9208.3	5677.77	3591.13	3060.93	3681.01		4169.41	-0.946427	0.518916	0.212526	-4.45323	8.45877e-06	3.63517e-05		4169.41	-0.0718418	0.951423	0.211817	-0.339169	0.734482	0.802032		4169.41	-0.715929	0.608813	0.212721	-3.36557	0.000763845	0.00636567
C14C10.6	erg-28	829.059	713.877	339.229	718.331	621.435	652.4	837.481	836.235	929.077	925.738	998.833	887.171	573.399	467.298	540.407	538.821	660.784	435.337	795.906	1357.59	895.335	498.274	512.893	406.337		707.135	0.0828951	1.05914	0.233955	0.354321	0.723098	0.779697		707.135	0.111415	1.08029	0.23341	0.477337	0.633122	0.71839		707.135	0.0488301	1.03443	0.235718	0.207155	0.835889	0.908255
C14C11.3	hex-2	1084.01	1141.68	1002.19	1397.94	1455.2	1394.13	812.226	826.049	697.822	511.855	499.417	542.543	562.176	560.968	463.798	487.411	496.051	477.603	793.722	564.145	589.583	386.755	454.21	405.139		733.609	0.396177	1.31602	0.115241	3.43781	0.000586429	0.00161932		733.609	-0.588299	0.665126	0.120633	-4.87676	1.07841e-06	4.54299e-06		733.609	-0.118998	0.920827	0.122867	-0.968507	0.332791	0.512261
C14C11.4	C14C11.4	54.767	57.74	123.949	61.6389	76.9988	85.3383	59.6036	46.8536	60.8566	31.9909	39.9144	34.4628	149.982	135.769	158.395	173.016	182.317	156.383	75.3327	50.955	63.4581	74.7411	56.3361	86.3017		87.3792	-0.0859601	0.942157	0.246215	-0.349127	0.726994	0.783042		87.3792	-0.653011	0.635952	0.278409	-2.34551	0.0190013	0.0385565		87.3792	0.204906	1.15261	0.233431	0.877804	0.38005	0.558848
C14C11.8	pqn-13	1860.19	2119.76	3724.17	3078	3570.72	3419.91	6717.02	7402.87	6547.15	2717.23	2644.08	2560.09	8862.18	9594.35	8880.49	12317.7	8111.73	11025	11029.1	8147.95	8731.83	2607.63	2661.88	2511.14		5868.43	0.385841	1.30662	0.190336	2.02716	0.0426463	0.0709564		5868.43	-1.3835	0.383287	0.190233	-7.27267	3.52457e-13	2.93856e-12		5868.43	0.202381	1.1506	0.189663	1.06706	0.285946	0.464288
C14C6.13	C14C6.13	0	0	0	0	0	0	0	0	0	1.99943	0	0	1.02028	2.10495	0	0.988662	3.70187	3.16993	0	2.42643	2.30757	0	0	0		0.738297	0	1	2.28007	0	1	NA		0.738297	1.82749	3.54919	2.2009	0.830338	0.406348	0.512546		0.738297	1.33471	2.52225	1.83761	0.726331	0.467636	NA
C14F11.2	lrch-1	1323.85	1637.72	2034.56	1625.53	1840.19	1749.04	2575.08	2877.42	2637.12	3862.91	3842.49	3763.34	1660	1736.58	1573.6	1592.74	1316.02	1597.64	2589.7	2424	2739.08	7876.29	8179.3	8342.5		2974.86	0.0610457	1.04322	0.119527	0.510728	0.609541	0.683712		2974.86	0.50357	1.41772	0.118517	4.24893	2.14794e-05	7.66891e-05		2974.86	-0.141675	0.906466	0.120406	-1.17665	0.239336	0.413485
C14F11.3	lite-1	5.66555	4.37424	16.3091	24.4975	21.7774	33.4973	53.5422	55.0021	56.7995	174.95	184.969	169.36	24.4868	41.0465	45.5516	65.2517	41.6461	64.4552	46.9464	33.97	38.0748	498.274	494.115	562.16		114.863	1.56114	2.95087	0.335685	4.65061	3.30955e-06	1.58225e-05		114.863	1.67867	3.20132	0.203107	8.26493	1.39775e-16	1.58754e-15		114.863	0.620989	1.53793	0.236868	2.62167	0.00875001	0.0393615
C14F11.4	C14F11.4	3.77703	7.87364	3.26181	7.90243	10.111	7.97555	8.08185	4.07423	1.01428	0	0	3.93861	5.10142	5.26237	5.17631	2.96599	1.85094	1.05664	1.09178	1.21321	0	5.93183	4.69468	3.5959		3.99798	0.803669	1.74554	0.611884	1.31343	0.189037	0.258406		3.99798	-1.74114	0.299134	0.932434	-1.8673	0.0618595	0.108315		3.99798	-1.39362	0.380608	0.821755	-1.69591	0.0899033	NA
C14F11.5	hsp-43	259.671	223.961	238.928	410.926	382.661	413.133	641.497	663.08	597.409	691.804	663.942	710.919	593.805	617.802	522.808	710.848	635.797	748.103	700.921	501.058	606.89	794.865	800.442	978.086		587.89	0.740745	1.67104	0.126712	5.84587	5.03924e-09	5.18383e-08		587.89	0.119777	1.08657	0.119458	1.00266	0.316023	0.4202		587.89	0.271677	1.20721	0.119978	2.2644	0.0235496	0.0803572
C14F11.6	rml-3	5305.79	3746.98	2212.32	8747.2	7132.89	7701.19	2387.18	2580	2435.28	991.719	1076.71	968.897	2058.93	1853.41	1620.19	2293.7	2582.06	2277.07	2087.48	1625.71	1902.59	1116.37	1298.08	1073.98		2794.82	1.06602	2.09366	0.196759	5.41791	6.02985e-08	4.52634e-07		2794.82	-1.28518	0.410319	0.198603	-6.47111	9.72879e-11	6.39068e-10		2794.82	0.370618	1.29291	0.197889	1.87286	0.0610884	0.15992
C14F5.1	dct-1	3109.44	2796.02	2659.19	3688.06	3531.84	3266.78	3237.79	3370.4	3036.74	3814.92	4055.69	3913.99	3475.09	3517.37	3100.61	3986.29	4576.44	4620.7	3832.14	3694.24	3812.1	7557.15	7935.18	7829.48		4100.74	0.292468	1.22473	0.0813675	3.59441	0.000325126	0.000961291		4100.74	0.289086	1.22187	0.0815094	3.54665	0.000390161	0.00113896		4100.74	0.385349	1.30618	0.0813678	4.7359	2.18088e-06	6.73856e-05
C14F5.3	tnt-3	2500.4	2603.55	3493.4	3885.62	3844.5	4079.49	8292.98	9320.81	7761.24	3038.14	2896.23	3222.77	3762.81	4266.73	3680.36	4086.14	3102.17	4443.18	7691.57	6175.26	7192.68	6981.77	6755.64	7128.28		5008.57	0.457721	1.37337	0.136377	3.3563	0.000789931	0.00212626		5008.57	-1.47045	0.360871	0.136214	-10.7951	3.63123e-27	8.34853e-26		5008.57	-0.00988068	0.993175	0.136413	-0.0724323	0.942258	0.972412
C14F5.4	sfxn-2	684.587	566.902	422.405	700.945	573.214	639.639	127.289	139.542	128.813	104.97	105.14	104.373	346.896	338.897	328.178	316.372	394.249	312.766	349.369	379.736	449.975	372.519	379.095	437.502		362.641	0.194772	1.14454	0.149387	1.30381	0.192299	0.262143		362.641	-0.331153	0.794901	0.179521	-1.84465	0.0650888	0.113062		362.641	0.0145527	1.01014	0.156537	0.092966	0.925931	0.962904
C14H10.1	zipt-13	811.118	692.005	794.251	1286.52	1155.76	1205.9	1035.49	1201.9	1098.46	794.775	783.685	822.184	1194.75	1255.6	1171.92	1155.75	993.027	952.035	1991.4	1612.36	1743.37	1664.47	1558.63	1624.15		1191.65	0.667315	1.58811	0.0987741	6.75598	1.41876e-11	3.18857e-10		1191.65	-0.474602	0.719665	0.0999946	-4.74628	2.07191e-06	8.47875e-06		1191.65	-0.224017	0.856178	0.0988475	-2.26629	0.0234336	0.0802243
C14H10.2	C14H10.2	3507.92	3453.03	3697.26	4932.7	4851.7	4889.81	3690.37	4088.49	3474.91	1974.44	1819.51	2017.55	4415.79	4520.37	4176.25	4869.16	4691.2	5977.43	3316.82	2646.02	3058.68	1980.05	2004.63	1844.7		3579.12	0.461253	1.37674	0.099102	4.65432	3.25044e-06	1.559e-05		3579.12	-0.953449	0.516396	0.100392	-9.49722	2.15562e-21	3.49459e-20		3579.12	0.244639	1.1848	0.0991716	2.46682	0.0136318	0.0544673
C14H10.3	C14H10.3	920.652	1062.94	1225.63	1474.59	1488.64	1576.77	1699.21	1765.16	1557.93	927.737	904.402	919.665	1597.76	1910.24	1793.08	2086.08	1780.6	1741.35	2677.04	2062.47	2113.73	799.611	910.767	851.031		1493.63	0.499663	1.41388	0.119248	4.19011	2.78819e-05	0.000105769		1493.63	-0.86798	0.547913	0.120232	-7.21923	5.2284e-13	4.29771e-12		1493.63	0.0813241	1.05799	0.118591	0.685753	0.492869	0.663033
C15A11.1	col-35	0.944258	0	5.70817	1.58049	0.777766	1.59511	4.04092	3.05567	2.02855	10.9969	9.73522	12.8005	2.04057	0	0	0	0	0	0	0	1.15378	1.18637	2.34734	1.19863		2.54959	-0.79778	0.575234	1.01719	-0.784301	0.432864	NA		2.54959	1.87713	3.67344	0.803327	2.3367	0.0194548	0.0392981		2.54959	-1.92161	0.263959	1.66835	-1.15181	0.2494	NA
C15A11.3	sol-1	148.249	196.841	239.743	253.668	285.44	279.144	249.527	247.509	244.441	238.932	229.751	263.887	306.085	265.223	295.05	373.714	340.572	345.522	346.094	228.084	251.525	404.551	343.885	328.426		279.411	0.480573	1.3953	0.157216	3.05677	0.00223733	0.0053706		279.411	-0.0174746	0.987961	0.158889	-0.10998	0.912425	0.941206		279.411	0.290486	1.22305	0.155015	1.87393	0.0609406	0.159628
C15A7.2	C15A7.2	63.2653	63.864	88.0689	86.9267	93.3319	102.087	131.33	158.895	147.07	107.969	96.3786	94.5266	125.495	109.457	97.3147	137.424	111.056	131.024	63.3231	35.1832	38.0748	41.5228	46.9468	40.7536		92.137	0.386056	1.30682	0.183606	2.10264	0.0354976	0.0605066		92.137	-0.549269	0.683366	0.176485	-3.11228	0.00185651	0.00475855		92.137	0.189572	1.14043	0.177117	1.07032	0.284476	0.463242
C15B12.4	C15B12.4	6.60981	13.9976	4.89272	47.4146	20.9997	36.6875	15.1535	8.14845	14.1999	8.99745	8.76169	12.8005	0	5.26237	5.17631	5.93197	8.32921	6.33986	8.73422	6.06607	4.61513	8.30456	2.34734	15.5823		11.473	2.04573	4.12882	0.479414	4.26714	1.97993e-05	7.74379e-05		11.473	-0.295781	0.814631	0.51569	-0.573564	0.566263	0.661061		11.473	0.994427	1.99229	0.670635	1.48282	0.138124	0.282286
C15B12.5	gar-1	40.6031	41.1179	81.5453	73.4926	73.11	74.1726	39.399	46.8536	38.5425	52.985	52.5702	50.2172	66.3184	92.6177	93.1737	97.8776	79.5902	84.5314	132.105	83.7118	117.686	123.382	144.361	164.213		81.0074	0.425263	1.34282	0.231765	1.83489	0.0665221	0.104976		81.0074	0.320019	1.24835	0.255485	1.2526	0.210353	0.301577		81.0074	0.0557209	1.03938	0.227154	0.245301	0.806224	0.89166
C15B12.6	actl-1	449.467	398.931	344.121	422.78	384.994	391.599	207.097	207.786	222.126	169.952	198.598	180.191	278.537	276.801	253.639	270.893	283.193	286.35	351.552	320.289	309.214	384.383	365.011	357.193		304.779	0.0108094	1.00752	0.104428	0.103511	0.917558	0.938758		304.779	-0.214709	0.86172	0.122701	-1.74986	0.080142	0.134939		304.779	0.0548913	1.03878	0.114534	0.479256	0.631756	0.770346
C15B12.7	cdf-1	918.763	1044.57	1015.24	964.887	902.986	963.446	1171.87	1130.6	1137	1149.67	1071.85	1054.56	649.921	651.481	613.911	607.039	653.38	672.025	1835.28	2690.91	2515.25	2680	2501.09	2484.77		1295.02	-0.0735375	0.950305	0.111279	-0.660837	0.508717	0.590658		1295.02	-0.0702696	0.95246	0.111492	-0.630268	0.528519	0.628015		1295.02	0.0126977	1.00884	0.115681	0.109765	0.912596	0.95356
C15C6.1	C15C6.1	1913.07	1456.62	1732.02	2389.69	2299.85	2572.91	1960.86	2001.46	1971.75	1158.67	1210.09	1048.65	2158.92	1823.94	1704.04	2541.85	1994.38	2345.75	6760.29	5202.27	4913.96	1325.17	1286.34	1057.2		2284.57	0.509616	1.42367	0.137458	3.70742	0.00020938	0.000645762		2284.57	-0.796103	0.575903	0.138805	-5.73541	9.7277e-09	5.31729e-08		2284.57	0.274981	1.20998	0.137801	1.99549	0.04599	0.13049
C15C6.2	C15C6.2	8.49832	3.4994	9.78544	1.58049	5.44436	7.97555	1.01023	0	4.0571	0	7.78817	11.8158	24.4868	38.9415	16.5642	30.6485	26.8386	27.4727	0	0	0	0	0	0		9.43363	-0.541287	0.687158	0.664628	-0.81442	0.415404	0.499304		9.43363	1.95469	3.87633	0.877123	2.22852	0.0258455	0.0504606		9.43363	0.0875656	1.06258	0.54755	0.159923	0.872942	0.930385
C15C6.4	popl-4	1138.78	890.596	427.297	479.677	475.215	413.133	198.005	200.656	187.641	124.965	138.24	153.606	3636.29	3977.3	3718.66	3057.93	2927.26	3009.32	179.052	241.43	223.834	342.86	309.849	260.104		1112.99	-0.84359	0.557255	0.215976	-3.90594	9.38595e-05	0.000313689		1112.99	-0.49212	0.710979	0.230706	-2.1331	0.0329164	0.0625124		1112.99	-0.333321	0.793707	0.212417	-1.56918	0.116605	0.251594
C15C7.4	C15C7.4	88.7603	84.8603	106.009	145.405	136.109	125.216	87.8901	99.8185	86.2135	428.879	361.177	390.907	110.191	111.562	129.408	222.449	179.541	292.69	22.9273	25.4775	27.6908	109.146	79.8095	116.268		148.683	0.538288	1.45225	0.18044	2.98319	0.00285258	0.00666541		148.683	2.10808	4.31118	0.177349	11.8866	1.3887e-32	4.18099e-31		148.683	0.98091	1.97371	0.176405	5.56054	2.68937e-08	1.58152e-06
C15C7.5	bbln-1	2668.47	2241.36	2003.57	3191	3312.51	3305.07	2360.91	2490.37	2542.79	2181.38	2448.41	2078.6	3448.56	3122.69	3031.25	4292.77	4090.57	7280.27	1538.31	1104.03	1136.48	1218.4	1322.72	1172.26		2649.28	0.504827	1.41895	0.173364	2.91195	0.00359183	0.00810913		2649.28	-0.140386	0.907276	0.173824	-0.807635	0.419301	0.524585		2649.28	0.705751	1.63099	0.173146	4.07605	4.58076e-05	0.000721445
C15C7.7	pfut-1	585.44	556.404	435.452	703.316	741.989	703.443	740.499	714.008	688.693	545.845	629.868	562.236	1643.68	1471.36	1318.92	1518.59	1704.71	1800.52	544.797	407.64	488.05	371.333	362.664	334.419		815.578	0.447543	1.36372	0.123795	3.61521	0.000300108	0.000894792		815.578	-0.302255	0.810984	0.124771	-2.42248	0.0154148	0.0321208		815.578	0.180022	1.1329	0.119576	1.5055	0.132195	0.273854
C15C8.1	xbx-9	100.091	92.734	108.455	171.483	190.553	160.308	82.8389	113.06	95.3419	260.926	237.539	244.194	196.915	172.606	202.912	257.052	200.827	361.372	50.2218	42.4625	44.9975	294.219	257.033	335.618		178.073	0.793195	1.73291	0.184599	4.29686	1.73233e-05	6.88396e-05		178.073	1.3506	2.55019	0.186796	7.23034	4.81772e-13	3.97737e-12		178.073	0.513806	1.42781	0.176538	2.91046	0.00360898	0.0208912
C15C8.2	cky-1	304.051	333.317	521.89	591.102	605.88	561.478	670.793	827.068	643.051	337.904	332.944	256.009	920.296	1120.88	971.077	1287.24	896.778	1531.08	1039.37	752.193	912.642	352.351	325.106	336.816		684.638	0.599579	1.51527	0.197397	3.03743	0.00238606	0.00567816		684.638	-1.20781	0.432925	0.199143	-6.06504	1.3192e-09	7.89956e-09		684.638	0.30213	1.23296	0.194238	1.55546	0.119837	0.255811
C15C8.4	C15C8.4	1622.24	1415.51	963.05	994.916	964.43	863.752	1045.59	917.719	1036.59	995.718	1130.26	1069.33	1184.55	1043	1061.14	1035.13	1360.44	920.336	363.562	491.352	441.899	358.283	387.311	364.385		917.937	-0.50239	0.705936	0.163579	-3.07124	0.00213172	0.00514531		917.937	0.0910669	1.06516	0.164516	0.553543	0.579892	0.672009		917.937	0.012422	1.00865	0.164306	0.0756026	0.939735	0.971636
C15F1.1	C15F1.1	281.389	242.333	227.511	388.799	360.106	460.987	220.23	225.101	238.355	176.95	217.095	198.9	205.077	192.603	163.572	220.472	230.442	227.178	465.097	297.238	371.518	414.042	419	378.769		284.282	0.689027	1.6122	0.145368	4.73987	2.13852e-06	1.08147e-05		284.282	-0.205054	0.867506	0.154561	-1.32668	0.184613	0.270974		284.282	0.272814	1.20816	0.155627	1.753	0.0796013	0.192394
C15F1.2	C15F1.2	50.0457	55.9903	32.6181	50.5755	57.5547	48.6508	21.2148	7.1299	11.157	16.9952	15.5763	14.7698	20.4057	19.997	22.7758	19.7732	24.9876	21.1329	46.9464	24.2643	49.6127	100.841	102.109	80.3085		38.143	0.182706	1.13501	0.254183	0.718797	0.472266	0.555269		38.143	0.259233	1.19684	0.371054	0.698641	0.484776	0.588225		38.143	0.0639726	1.04534	0.325897	0.196297	0.844378	0.913531
C15F1.5	C15F1.5	104.813	72.6125	44.8499	47.4146	42.7771	48.6508	10.1023	7.1299	10.1428	14.9958	14.6028	20.6777	4345.39	4358.29	4287.02	3268.52	3099.39	3144.57	6.55067	12.1321	16.153	8.30456	5.86834	4.79454		958.156	-0.668484	0.629167	0.218045	-3.06581	0.00217085	0.00522788		958.156	0.876516	1.83594	0.381251	2.29905	0.0215021	0.0428854		958.156	-0.449593	0.73225	0.166822	-2.69505	0.00703784	0.0336745
C15F1.6	art-1	4723.18	4073.3	3700.53	4036.56	4038.94	3916.79	5272.39	5265.94	5512.59	8176.69	8438.49	8019.01	4083.17	4650.88	4514.78	5139.07	4659.73	5175.44	2927.06	3518.32	3163.67	4970.87	5008.05	4822.11		4908.65	-0.0591447	0.959833	0.0886168	-0.66742	0.504504	0.586498		4908.65	0.618009	1.53476	0.0882307	7.00447	2.47929e-12	1.89621e-11		4908.65	0.176541	1.13017	0.0887142	1.99	0.0465908	0.13158
C15H11.10	C15H11.10	0	0	0	0	0	0	0	0	0	0	0.973522	0	0	0	0	0	0.925468	0	0	0	0	2.37273	0	0		0.177988	0	1	5.7692	0	1	NA		0.177988	0.92071	1.89305	5.76877	0.159603	0.873194	0.912147		0.177988	0.894629	1.85913	5.7692	0.15507	0.876766	NA
C15H11.11	C15H11.11	69.8751	49.8664	35.0645	79.8145	79.3321	63.0068	38.3888	45.835	36.5139	32.9907	57.4378	26.5856	23.4665	19.997	12.4232	26.6939	21.2858	36.9825	8.73422	8.4925	9.23026	18.9819	9.38935	17.9795		34.5153	0.527885	1.44181	0.28621	1.8444	0.0651253	0.103078		34.5153	-0.0437347	0.97014	0.312552	-0.139928	0.888717	0.922881		34.5153	0.595883	1.5114	0.354402	1.68137	0.0926902	0.213554
C15H11.2	gnrr-2	329.546	319.32	411.804	248.136	261.329	254.42	12.1228	12.2227	13.1856	21.9938	30.1792	26.5856	185.692	151.556	125.267	161.152	191.572	144.76	26.2027	20.6247	25.3832	30.8455	37.5574	37.1577		128.276	-0.47466	0.719636	0.155972	-3.04324	0.00234044	0.0055803		128.276	1.0708	2.1006	0.320529	3.34072	0.000835608	0.00229785		128.276	0.107243	1.07717	0.171027	0.62705	0.530626	0.695297
C15H11.3	nxf-1	1986.72	2687.54	3900.31	2146.3	2099.97	1970.76	5680.53	5360.66	5660.67	7744.81	7587.63	7657.64	3465.9	3686.82	3406.01	3228.97	2755.12	2629.98	5160.83	7445.5	5824.3	9806.5	8944.53	9892.33		5030.43	-0.464185	0.72488	0.168677	-2.75191	0.00592481	0.0125569		5030.43	0.461	1.3765	0.167901	2.74567	0.00603874	0.0139301		5030.43	-0.293637	0.815843	0.168578	-1.74185	0.0815352	0.195256
C15H11.4	dhs-22	4133.96	2937.74	1901.64	2372.31	2016.75	1903.76	1019.32	894.293	1117.73	1180.67	1126.36	1154.01	802.963	691.475	784.729	734.576	892.151	683.648	724.94	757.046	741.882	1149.59	1246.44	1235.79		1341.82	-0.511613	0.701438	0.182382	-2.80518	0.0050289	0.0108805		1341.82	0.191226	1.14173	0.184629	1.03573	0.300328	0.403432		1341.82	0.0200016	1.01396	0.186108	0.107473	0.914414	0.95474
C15H11.9	rrbs-1	3845.02	2691.04	2054.13	2713.69	2453.85	2227.57	1435.54	1470.8	1397.67	1492.58	1610.2	1611.88	2072.2	1849.2	1637.79	1698.52	1789.86	2222.12	968.407	946.308	1025.71	2888.8	3396.6	2355.32		1993.95	-0.215797	0.86107	0.173862	-1.2412	0.214534	0.287139		1993.95	0.131489	1.09542	0.175269	0.750211	0.453128	0.558369		1993.95	0.0385495	1.02708	0.174763	0.220581	0.825418	0.903068
C15H9.1	nnt-1	338.989	382.309	313.949	572.136	478.326	527.184	953.658	1029.76	914.877	1226.65	1302.57	1276.11	384.647	413.622	428.599	858.159	794.977	779.802	377.755	404.001	384.21	1550.58	1573.89	1598.98		786.073	0.608488	1.52466	0.0942427	6.45661	1.07075e-10	1.80211e-09		786.073	0.392907	1.31304	0.085701	4.58463	4.54798e-06	1.78323e-05		786.073	0.988044	1.98349	0.0931729	10.6044	2.84241e-26	2.07268e-23
C15H9.3	C15H9.3	12.2754	6.99879	8.96998	15.0146	17.8886	24.7242	1.01023	0	1.01428	13.996	8.76169	8.86187	2.04057	2.10495	4.14105	1.97732	2.7764	2.11329	1.09178	6.06607	6.9227	34.4046	50.4678	27.5686		10.8829	1.03572	2.05014	0.42392	2.44321	0.0145572	0.027867		10.8829	3.96032	15.5659	1.09181	3.6273	0.000286399	0.000854803		10.8829	-0.263004	0.833351	0.802602	-0.327689	0.743147	0.850711
C15H9.4	C15H9.4	1106.67	1175.8	1203.61	1067.62	1081.09	1067.93	1402.2	1386.26	1382.46	1659.53	1522.59	1520.3	914.174	835.664	911.031	901.66	749.629	993.244	895.258	850.464	998.022	908.757	941.282	852.229		1096.98	-0.116408	0.922481	0.0919178	-1.26644	0.205356	0.276696		1096.98	0.172975	1.12738	0.0914183	1.89213	0.0584735	0.103268		1096.98	-0.0105332	0.992726	0.0948937	-0.111	0.911617	0.953184
C15H9.5	C15H9.5	706.305	817.984	823.608	784.711	769.988	761.665	633.415	625.394	598.423	704.8	694.121	699.103	940.701	1055.63	876.868	1005.47	1057.81	1010.15	1140.91	1199.87	1216.09	1306.19	1329.77	1362.85		921.742	-0.020793	0.985691	0.0799156	-0.260187	0.794719	0.839403		921.742	0.175842	1.12962	0.0837601	2.09936	0.0357854	0.0673039		921.742	0.0977265	1.07009	0.0795079	1.22914	0.219018	0.389722
C15H9.7	kynu-1	1040.57	939.588	621.375	843.189	794.877	683.504	549.566	578.54	533.509	455.871	460.476	456.878	849.896	818.825	691.556	702.939	899.555	663.572	603.753	846.824	799.571	899.266	962.409	925.346		734.227	-0.163346	0.892952	0.164144	-0.99514	0.319668	0.401285		734.227	-0.275002	0.826449	0.168221	-1.63477	0.102098	0.165399		734.227	-0.0581251	0.960512	0.165396	-0.35143	0.725266	0.839669
C16A11.8	clec-135	0	4.37424	3.26181	0	0.777766	1.59511	0	0	0	0	0	0	0	0	0	2.96599	1.85094	1.05664	2016.51	2036.99	2449.48	2898.29	3099.66	3374.16		662.124	-1.73368	0.300685	0.971359	-1.78479	0.0742949	0.115551		662.124	0	1	1.67133	0	1	1		662.124	3.37314	10.3614	1.32393	2.54782	0.0108398	0.0459288
C16A3.1	smrc-1	582.607	800.487	693.951	438.585	501.659	420.311	674.834	634.561	707.965	752.787	762.267	806.43	768.273	804.09	820.963	588.254	736.673	626.589	445.445	834.692	626.504	435.396	433.084	453.084		639.562	-0.610647	0.654903	0.161688	-3.7767	0.00015892	0.000501359		639.562	0.202578	1.15075	0.161207	1.25663	0.208888	0.299931		639.562	-0.293973	0.815653	0.161288	-1.82266	0.0683555	0.173313
C16A3.10	oatr-1	1508.92	1408.51	1038.89	1371.07	1392.98	1313.57	1507.26	1516.63	1608.64	1278.64	1367.8	1329.28	1367.18	1327.17	1425.56	1341.61	1389.13	1192.95	2056.91	1767.65	1681.06	1047.56	1035.18	1038.02		1388.01	0.0444916	1.03132	0.11256	0.395269	0.692645	0.752352		1388.01	-0.220552	0.858237	0.113036	-1.95117	0.0510365	0.0917134		1388.01	-0.0700266	0.95262	0.113374	-0.617662	0.536798	0.700383
C16A3.3	let-716	2011.27	2527.44	2531.98	1560.73	1555.53	1481.06	2203.31	2490.37	2243.58	1419.6	1221.77	1432.67	3002.69	3020.6	2523.97	2205.71	2128.58	2215.78	1644.22	1821.04	2042.2	1856.66	2025.75	1996.93		2048.48	-0.6214	0.65004	0.107736	-5.76779	8.03197e-09	7.74965e-08		2048.48	-0.767968	0.587244	0.108627	-7.06978	1.55177e-12	1.21625e-11		2048.48	-0.384018	0.7663	0.107511	-3.57189	0.000354415	0.00356468
C16A3.4	znf-622	3435.21	2741.78	1705.93	2000.1	2029.97	2033.76	1457.76	1324.12	1473.74	3344.05	3686.73	3272.98	1928.34	1773.42	1675.06	2291.72	2297.01	3147.74	1292.66	1659.68	1510.3	4323.12	4490.46	4474.5		2473.76	-0.378147	0.769425	0.174904	-2.16203	0.0306156	0.0532622		2473.76	1.27573	2.42121	0.175454	7.27103	3.56756e-13	2.97114e-12		2473.76	0.524724	1.43866	0.175374	2.99202	0.00277135	0.0170825
C16A3.7	nfx-1	1731.77	1823.19	1862.5	1257.28	1279.43	1262.53	3267.09	2817.33	3294.37	3970.88	3684.78	4034.12	7300.13	6892.65	7501.52	6899.87	7538.86	7844.52	1524.12	1942.36	1722.6	3007.44	3342.61	3033.74		3701.49	-0.512104	0.701199	0.0922095	-5.5537	2.79685e-08	2.2689e-07		3701.49	0.31774	1.24638	0.0901889	3.52305	0.000426612	0.00123775		3701.49	0.0386008	1.02712	0.0890239	0.4336	0.664579	0.794762
C16A3.8	thoc-2	2744.01	3138.96	2959.28	2201.62	2019.86	2015.42	2551.84	2672.69	2592.49	2073.41	1522.59	2038.23	2596.62	2609.08	2849.04	2044.55	1893.51	2156.61	1205.32	1935.08	1711.06	1274.16	1318.03	1168.67		2137.17	-0.503648	0.705321	0.137621	-3.65969	0.000252524	0.000766119		2137.17	-0.472467	0.720731	0.138217	-3.4183	0.000630141	0.00177135		2137.17	-0.402437	0.756579	0.138114	-2.9138	0.00357057	0.0207628
C16A3.9	rps-13	13884.4	10598.8	7056.93	12678.7	12851.8	13796.9	7021.1	7368.24	7353.5	5293.5	5874.23	5507.16	5498.31	5012.93	4412.29	5198.39	4499.63	4330.12	6480.79	5523.77	6329.65	4701.57	5017.43	5253.62		7147.65	0.318448	1.24699	0.160158	1.98834	0.046774	0.0770316		7147.65	-0.382857	0.766918	0.160533	-2.3849	0.0170836	0.0350591		7147.65	-0.0892586	0.940006	0.160755	-0.555246	0.578727	0.731002
C16B8.1	lin-18	220.012	250.207	333.52	347.707	337.55	330.985	418.236	445.109	350.939	446.874	424.455	461.802	430.56	497.82	433.775	507.184	414.61	400.468	585.193	385.802	452.283	460.31	392.005	459.077		407.77	0.3359	1.26216	0.159977	2.09968	0.0357572	0.0608691		407.77	0.134696	1.09786	0.158073	0.85211	0.394153	0.500492		407.77	-0.0425946	0.970907	0.15764	-0.270203	0.787004	0.88019
C16B8.4	C16B8.4	612.824	637.765	646.654	610.858	689.101	685.099	1072.87	1120.41	909.806	625.823	617.213	573.067	820.308	771.463	658.427	623.846	736.673	576.927	729.307	884.434	897.643	735.547	738.238	716.784		737.128	0.0650235	1.0461	0.115356	0.563676	0.572974	0.651637		737.128	-0.772869	0.585252	0.115446	-6.69461	2.16248e-11	1.51354e-10		737.128	-0.214735	0.861705	0.116354	-1.84553	0.06496	0.166768
C16C10.10	glod-4	1562.75	1188.04	575.71	882.701	728.767	734.548	150.524	113.06	127.799	141.96	134.346	143.759	220.381	206.285	208.088	257.052	297.075	252.538	255.476	275.4	289.599	434.21	470.641	483.05		422.24	-0.503072	0.705603	0.217333	-2.31476	0.0206263	0.0378955		422.24	0.101868	1.07316	0.237199	0.429461	0.667588	0.746058		422.24	0.346233	1.27124	0.227891	1.51929	0.12869	0.268193
C16C10.11	har-1	2891.32	2871.25	2675.5	2260.88	2671.63	2623.16	1777	1946.46	1935.24	2398.32	2317.95	2126.85	2282.37	2342.81	2288.97	2507.25	2477.48	2309.82	2647.56	2989.36	2807.15	4250.75	4208.78	4892.83		2687.53	-0.15918	0.895534	0.0852434	-1.86736	0.0618519	0.098547		2687.53	0.274179	1.20931	0.086635	3.16477	0.00155208	0.00403967		2687.53	0.0774539	1.05515	0.0861798	0.898748	0.368787	0.547252
C16C10.13	C16C10.13	49.1014	43.7424	17.94	30.8195	25.6663	17.5462	24.2455	20.3711	27.3855	20.9941	25.3116	21.6623	8.16227	5.26237	10.3526	12.8526	12.0311	9.50979	3.27533	3.63964	5.76891	3.5591	1.17367	3.5959		16.832	-0.572279	0.672554	0.343791	-1.66461	0.0959899	0.144169		16.832	-0.082816	0.944213	0.372762	-0.222169	0.824183	0.873334		16.832	0.534753	1.44869	0.479221	1.11588	0.264473	0.440931
C16C10.2	C16C10.2	1770.48	1370.89	733.092	904.038	840.765	796.757	605.128	602.985	627.837	698.802	751.559	652.824	609.109	491.505	460.692	486.422	510.858	574.814	289.321	419.772	417.669	277.61	305.154	234.932		643.042	-0.60768	0.656251	0.211534	-2.87273	0.00406939	0.00899225		643.042	0.196066	1.14557	0.213903	0.916609	0.359347	0.466046		643.042	0.00961204	1.00668	0.215223	0.0446608	0.964378	0.985598
C16C10.4	C16C10.4	9893.94	6632.23	3432.24	5667.62	4630.04	4653.73	2438.7	2289.72	2513.38	2353.33	2443.54	2305.07	1754.89	1579.76	1604.66	1529.46	2194.28	1335.6	1378.92	2250.51	1886.43	768.765	699.507	741.955		2790.76	-0.416614	0.749181	0.245527	-1.69681	0.0897316	0.13645		2790.76	-0.0281316	0.98069	0.246298	-0.114218	0.909065	0.938505		2790.76	0.0348451	1.02445	0.246832	0.141169	0.887736	0.939131
C16C10.5	rnf-121	1465.49	1195.04	901.891	1272.29	1158.87	1129.34	736.458	743.546	737.379	1070.7	1205.22	1029.95	1338.61	1276.65	1127.4	1108.29	1250.31	1157.02	1016.45	1134.36	1055.71	1217.21	1186.58	1172.26		1111.96	0.000259547	1.00018	0.128496	0.00201989	0.998388	1		1111.96	0.576224	1.49094	0.130804	4.40525	1.05664e-05	3.924e-05		1111.96	-0.0901338	0.939436	0.129225	-0.697497	0.485492	0.656445
C16C10.6	ccdc-55	4941.3	3339.3	2615.97	2324.1	2111.63	1919.71	1242.58	1210.05	1282.04	1626.54	1524.53	1744.8	1047.83	943.016	996.958	817.624	817.188	974.225	924.736	1329.68	1031.48	823.338	911.941	780.311		1553.37	-0.777538	0.583361	0.170949	-4.54836	5.40666e-06	2.44054e-05		1553.37	0.390574	1.31091	0.172575	2.26321	0.0236227	0.0465977		1553.37	-0.195909	0.873023	0.174096	-1.12529	0.260464	0.436626
C16C2.2	eat-16	1524.03	1743.57	2395.8	2304.35	2359.74	2191.68	5709.82	6039.02	5472.02	5841.35	5841.13	5828.15	1799.78	2014.43	1896.6	2130.57	1888.88	2217.89	3030.77	2642.38	2913.3	2885.24	2715.87	2869.53		3177.33	0.27496	1.20996	0.121214	2.26839	0.0233057	0.0420921		3177.33	0.0240752	1.01683	0.119878	0.200831	0.840831	0.886518		3177.33	0.127053	1.09206	0.121815	1.043	0.29695	0.475517
C16C2.3	ocrl-1	915.931	1046.32	976.913	968.048	983.874	934.734	1068.82	1114.3	1107.59	1246.65	1279.21	1187.49	963.148	1084.05	1099.45	989.651	982.847	967.885	1437.87	1588.1	1675.29	1971.74	2032.79	1902.23		1230.21	-0.0264278	0.981848	0.0777194	-0.340041	0.733826	0.788635		1230.21	0.174359	1.12846	0.0777481	2.24262	0.0249213	0.0489205		1230.21	-0.0975153	0.934641	0.0789705	-1.23483	0.216893	0.387454
C16C2.4	C16C2.4	2944.2	2463.57	1957.09	1855.49	1663.64	1561.61	1451.7	1286.44	1521.41	1663.53	1646.23	1625.66	1098.85	1099.83	1130.51	1131.03	1055.03	1120.04	718.39	736.421	657.656	905.197	1019.92	903.771		1384.05	-0.535095	0.690113	0.117443	-4.5562	5.20886e-06	2.35698e-05		1384.05	0.212448	1.15865	0.118883	1.78704	0.0739314	0.125907		1384.05	-0.0101976	0.992956	0.120386	-0.0847078	0.932494	0.966559
C16C8.18	C16C8.18	1.88852	6.12394	1.63091	0.790243	1.55553	4.78533	2.02046	2.03711	3.04283	3.99887	3.89409	6.89256	1.02028	0	1.03526	0.988662	0	0	2.18356	4.85286	1.15378	11.8637	9.38935	7.19181		3.26415	-0.43905	0.73762	0.807913	-0.543438	0.586828	0.664028		3.26415	1.05833	2.08252	0.817728	1.29424	0.195584	0.284217		3.26415	-0.961847	0.513399	1.63146	-0.589564	0.555483	NA
C16D6.2	npr-4	49.1014	52.4909	79.099	51.3658	69.2212	61.4117	54.5525	65.1876	69.985	189.946	179.128	132.928	117.333	110.51	110.773	111.719	97.1741	135.25	110.27	61.874	94.6102	194.564	171.356	196.576		106.934	0.00382898	1.00266	0.221251	0.017306	0.986192	0.991792		106.934	1.40379	2.64596	0.212372	6.61006	3.84165e-11	2.62345e-10		106.934	0.0201934	1.0141	0.205544	0.0982434	0.921739	0.959914
C16D9.1	C16D9.1	55.7112	62.1143	64.4208	79.8145	83.221	86.9335	33.3376	28.5196	34.4854	178.949	206.387	208.746	127.535	88.4078	138.725	211.574	171.212	294.803	171.409	131.027	103.84	1132.98	1207.71	1350.86		260.53	0.453785	1.36963	0.217072	2.09048	0.0365748	0.0619631		260.53	2.62441	6.16633	0.236471	11.0983	1.27911e-28	3.22412e-27		260.53	0.930302	1.90567	0.199189	4.67044	3.00552e-06	8.5946e-05
C16D9.6	C16D9.6	366.372	335.942	230.773	263.941	288.551	261.598	474.808	453.258	556.838	514.854	499.417	436.201	171.408	177.868	164.607	228.381	214.709	227.178	281.679	197.754	215.757	217.105	207.739	186.987		298.905	-0.19417	0.874076	0.153278	-1.26678	0.205234	0.276633		298.905	-0.0338968	0.976778	0.149512	-0.226716	0.820644	0.870678		298.905	0.382967	1.30402	0.163668	2.33991	0.0192886	0.0703263
C16D9.8	C16D9.8	1.88852	0.874849	2.44636	5.5317	3.88883	2.39266	1.01023	2.03711	2.02855	12.9963	16.5499	14.7698	0	0	1.03526	0	0.925468	0	6.55067	1.21321	0	15.4228	22.2997	19.1782		5.54333	1.173	2.2548	0.787027	1.49042	0.136114	0.195097		5.54333	3.12774	8.74066	0.771716	4.05297	5.05707e-05	0.000171362		5.54333	-0.0671528	0.95452	1.70534	-0.039378	0.968589	NA
C16E9.1	C16E9.1	5.66555	8.74849	10.6009	13.4341	12.4443	13.5584	2.02046	1.01856	3.04283	4.99859	4.86761	8.86187	14.284	9.47226	4.14105	16.8073	8.32921	17.9629	70.9655	65.5136	57.6891	160.159	137.319	176.199		34.5044	0.639641	1.55794	0.38518	1.66063	0.096788	0.145192		34.5044	1.62187	3.07775	0.700839	2.31419	0.0206573	0.0413747		34.5044	0.608739	1.52493	0.400116	1.52141	0.128158	0.267466
C16E9.2	C16E9.2	987.694	949.211	895.368	839.238	780.877	725.775	536.433	542.891	543.652	472.866	489.681	473.618	652.981	657.796	682.238	699.973	655.231	704.781	1127.81	1313.91	1280.7	1421.27	1355.59	1435.96		842.731	-0.271044	0.82872	0.0792104	-3.42182	0.000622037	0.00170687		842.731	-0.176333	0.88495	0.0875166	-2.01485	0.0439206	0.0803148		842.731	0.0470327	1.03314	0.0837351	0.561684	0.574331	0.727972
C16H3.1	ncs-7	17.9409	21.8712	35.0645	30.8195	27.2218	40.6753	17.1739	14.2598	15.2141	21.9938	25.3116	22.647	53.0547	45.2564	40.3753	48.4445	59.23	32.7559	45.8547	19.4114	41.5362	48.641	32.8627	32.3631		32.9158	0.386619	1.30733	0.30842	1.25354	0.210008	0.282294		32.9158	0.584789	1.49982	0.359005	1.62892	0.103331	0.166995		32.9158	0.0238836	1.01669	0.2906	0.0821873	0.934498	0.968047
C16H3.2	lec-9	2545.72	2028.77	2079.41	3731.53	3750.39	4105.01	2039.66	2119.62	2086.37	2178.38	2435.75	2269.62	3783.21	2940.61	3470.2	6421.36	6108.09	9139.96	10715.8	7108.23	7362.29	8010.34	8747.35	8229.83		4725.31	0.800387	1.74157	0.158482	5.05034	4.41024e-07	2.5976e-06		4725.31	0.140366	1.10218	0.159174	0.881841	0.377863	0.48533		4725.31	1.0878	2.1255	0.158135	6.87894	6.03016e-12	7.45287e-10
C16H3.3	C16H3.3	2608.04	2686.66	3254.47	3036.9	3103.29	3012.36	4085.37	4470.44	3939.45	6193.25	5873.26	5942.37	3020.04	3136.37	2693.75	2644.67	2129.5	3145.63	1642.03	1869.56	2134.5	2961.17	3197.07	2922.27		3320.94	0.0981824	1.07042	0.126	0.779222	0.435849	0.519219		3320.94	0.527325	1.44125	0.125563	4.1997	2.67269e-05	9.44468e-05		3320.94	-0.160629	0.894635	0.12644	-1.2704	0.203943	0.37188
C17C3.1	C17C3.1	408.864	316.695	227.511	477.307	346.106	358.102	343.478	310.66	294.14	1894.46	1844.82	1860.01	501.979	472.561	437.916	479.501	483.094	313.823	426.885	494.992	552.662	1796.16	1965.9	1901.03		771.194	0.312238	1.24163	0.181984	1.71575	0.0862085	0.131766		771.194	2.56183	5.90457	0.180005	14.232	5.80033e-46	3.07742e-44		771.194	-0.144896	0.904444	0.181517	-0.798251	0.424725	0.603488
C17C3.4	ins-11	0	3.4994	0.815453	8.69267	3.88883	12.7609	1.01023	1.01856	1.01428	10.9969	9.73522	8.86187	64.2779	41.0465	33.1284	54.3764	51.8262	50.7189	3.27533	1.21321	2.30757	55.7592	64.5518	63.5276		22.846	2.53058	5.77805	0.731587	3.45903	0.000542121	0.00150873		22.846	3.28106	9.72073	0.903751	3.6305	0.000282876	0.000845952		22.846	0.179546	1.13253	0.286859	0.625902	0.531379	0.695869
C17D12.1	dhhc-7	958.422	955.335	1059.27	878.75	937.208	928.354	1153.68	1024.67	1053.83	1092.69	1072.82	1035.85	601.967	650.429	613.911	588.254	617.287	607.57	1690.07	2608.41	1968.35	1129.42	1043.39	1030.83		1054.2	-0.115787	0.922879	0.11817	-0.979834	0.327168	0.409249		1054.2	-0.0138574	0.990441	0.118515	-0.116925	0.906919	0.936673		1054.2	-0.0415547	0.971607	0.122651	-0.338803	0.734758	0.845888
C17D12.2	unc-75	189.796	356.938	662.963	426.731	500.104	468.962	2314.44	2451.67	2292.26	1117.68	1024.14	1151.06	1528.38	1706.06	1507.34	1515.62	1141.1	1434.92	798.089	611.46	642.657	352.351	298.112	375.173		1036.17	0.20451	1.15229	0.251221	0.814063	0.415609	0.499388		1036.17	-1.09999	0.466519	0.247689	-4.44102	8.95354e-06	3.36123e-05		1036.17	-0.212849	0.862832	0.247762	-0.859084	0.390294	0.568409
C17D12.5	C17D12.5	3.77703	2.62455	4.07727	4.74146	2.3333	5.58288	4.04092	1.01856	3.04283	0.999717	1.94704	0.984652	0	1.05247	2.07053	0.988662	2.7764	2.11329	15.2849	12.1321	20.7681	4.74546	0	3.5959		4.19575	0.267663	1.20386	0.684069	0.39128	0.69559	0.754629		4.19575	-1.04117	0.485932	0.972151	-1.071	0.284169	0.385412		4.19575	0.927788	1.90236	1.09787	0.845079	0.398067	NA
C17D12.6	spe-9	3.77703	6.99879	17.1245	3.16097	4.6666	5.58288	2.02046	1.01856	1.01428	0.999717	0.973522	1.9693	1.02028	2.10495	0	1.97732	2.7764	1.05664	1.09178	1.21321	1.15378	0	1.17367	0		2.61978	-1.07228	0.475568	0.69852	-1.53507	0.124766	NA		2.61978	-0.040845	0.972085	1.15827	-0.0352638	0.971869	0.984324		2.61978	0.921053	1.8935	1.15892	0.794754	0.426757	NA
C17E4.11	C17E4.11	524.063	408.554	198.155	346.917	264.44	279.144	247.507	258.713	282.983	358.898	441.005	327.889	3187.37	2912.19	2769.33	2373.78	2992.04	3091.74	67.6902	95.844	102.687	74.7411	86.8515	99.4867		908	-0.342842	0.788487	0.23283	-1.4725	0.140887	0.200816		908	0.515126	1.42912	0.235039	2.19166	0.028404	0.054835		908	-0.0685316	0.953608	0.226353	-0.302765	0.762069	0.863158
C17E4.3	2003-03-01	1742.16	1552.86	1021.76	637.726	616.768	513.625	910.218	759.843	1030.5	702.801	625.974	695.164	1395.75	1262.97	2206.15	911.547	1326.2	810.445	635.415	1174.39	674.963	75.9274	86.8515	58.7331		892.864	-1.28747	0.409669	0.24916	-5.16725	2.37569e-07	1.51437e-06		892.864	-0.416127	0.749434	0.250049	-1.66418	0.0960771	0.157234		892.864	-0.674109	0.626719	0.248693	-2.71061	0.00671602	0.0327799
C17E4.6	C17E4.6	2678.86	2781.14	2639.62	1610.51	1549.31	1446.76	1863.88	1623.58	1840.91	1446.59	1313.28	1332.23	2551.73	2596.45	2898.74	2017.86	2446.94	1862.86	360.287	714.584	537.663	309.642	326.28	228.939		1624.11	-0.814141	0.568747	0.166457	-4.89099	1.00328e-06	5.43583e-06		1624.11	-0.380881	0.767969	0.167403	-2.27523	0.0228921	0.0452912		1624.11	-0.346557	0.786459	0.166492	-2.08152	0.0373863	0.113403
C17E7.4	C17E7.4	2518.34	2000.78	1398.5	912.731	843.876	755.284	1342.6	1083.74	1409.84	1287.64	1092.29	1184.54	915.194	916.705	1385.18	658.449	847.729	527.265	2528.56	5241.09	3259.44	660.806	603.266	593.324		1415.3	-1.23601	0.424545	0.236722	-5.22135	1.77624e-07	1.1683e-06		1415.3	-0.106017	0.92915	0.237068	-0.447202	0.65473	0.735371		1415.3	-0.661298	0.632309	0.238241	-2.77576	0.00550732	0.0283812
C17E7.5	nhr-157	13.2196	14.8724	23.6481	37.9317	29.5551	44.6631	23.2353	25.4639	31.4426	37.9892	45.7555	32.4935	7.14198	5.26237	5.17631	10.8753	6.47828	4.22657	61.1396	38.8229	29.9984	141.178	139.667	176.199		41.1015	1.10204	2.14657	0.304233	3.62234	0.000291945	0.00087255		41.1015	0.537054	1.45101	0.294916	1.82104	0.0686004	0.118289		41.1015	0.301593	1.2325	0.510109	0.591232	0.554365	0.711946
C17G1.2	C17G1.2	0	0	0	4.74146	0	0	4.04092	6.11134	5.07138	1.99943	5.84113	5.90791	2.04057	0	2.07053	0.988662	3.70187	2.11329	3.27533	0	4.61513	27.2864	43.4258	25.1713		6.18344	3.29054	9.78479	1.39463	2.35944	0.0183026	0.0340383		6.18344	-0.143302	0.905444	0.705933	-0.202997	0.839138	0.885117		6.18344	0.733993	1.66324	1.01517	0.723028	0.469663	NA
C17G1.4	nra-3	2380.48	3351.55	4876.41	2558.02	2673.96	2363.15	6113.92	6585.99	5988.29	6495.16	5791.48	6276.17	10193.7	10995.2	9373.27	8441.2	6168.24	10826.4	4216.45	5153.74	6211.97	4795.29	5049.12	5197.28		5919.85	-0.482267	0.715852	0.201748	-2.39044	0.0168282	0.0317084		5919.85	-0.00971476	0.993289	0.201339	-0.0482507	0.961516	0.977492		5919.85	-0.264951	0.832227	0.20116	-1.31712	0.1878	0.351823
C17G1.6	nas-37	2.83277	5.24909	4.07727	1.58049	2.3333	2.39266	15.1535	14.2598	15.2141	22.9935	17.5234	16.7391	9.18255	3.15742	3.10579	9.88662	6.47828	13.7364	16.3767	18.1982	27.6908	7.1182	2.34734	3.5959		10.051	-0.955711	0.515587	0.695686	-1.37377	0.169514	0.235439		10.051	0.358477	1.28207	0.397469	0.901899	0.367111	0.47425		10.051	0.940852	1.91966	0.531797	1.7692	0.0768613	0.1877
C17G1.7	cysl-1	2967.8	2554.56	2655.93	5884.94	5778.02	6241.66	1664.86	1634.78	1666.46	1686.52	1896.42	1660.12	1568.18	1804.99	1720.61	3727.26	3248.39	3800.74	2541.66	2416.72	2581.01	2306.3	2343.82	2394.87		2781.11	1.13072	2.18969	0.0817021	13.8396	1.4704e-43	1.21537e-40		2781.11	0.0783722	1.05583	0.0847147	0.92513	0.354898	0.461555		2781.11	1.08091	2.11537	0.0835146	12.9428	2.5805e-38	2.68815e-35
C17G10.1	C17G10.1	1271.92	1306.15	857.041	695.414	611.324	590.19	842.532	693.637	816.492	724.795	703.856	705.011	46.933	37.8891	47.6221	41.5238	58.3045	56.0021	256.568	373.67	413.054	320.319	338.017	306.85		504.796	-0.856203	0.552404	0.166247	-5.15019	2.60218e-07	1.63631e-06		504.796	-0.141	0.90689	0.16763	-0.84114	0.40027	0.506705		504.796	0.234423	1.17644	0.236032	0.993184	0.32062	0.499992
C17G10.2	ttc-4	987.694	971.082	678.457	544.477	496.992	439.453	305.09	315.753	315.44	223.937	190.81	194.961	274.456	283.115	228.793	221.46	242.473	220.838	248.925	289.958	258.447	176.769	183.092	125.857		350.764	-0.831671	0.561878	0.146197	-5.68871	1.28e-08	1.1669e-07		350.764	-0.619089	0.651082	0.158724	-3.90041	9.60286e-05	0.000310956		350.764	-0.198804	0.871273	0.159124	-1.24936	0.211532	0.380299
C17G10.5	lys-8	510.844	403.305	398.757	851.882	914.653	1024.86	367.724	377.884	404.696	584.834	700.936	651.84	1021.3	1068.26	1255.77	1623.38	1278.07	1670.55	1401.84	850.464	1017.64	2096.31	2289.83	2321.76		1045.31	1.08918	2.12753	0.159206	6.84133	7.84636e-12	1.86483e-10		1045.31	0.752365	1.68455	0.16205	4.64279	3.43734e-06	1.36254e-05		1045.31	0.450386	1.36641	0.156401	2.87969	0.00398064	0.0224319
C17G10.6	C17G10.6	13.2196	12.2479	8.96998	4.74146	10.111	14.356	5.05115	1.01856	6.08566	18.9946	39.9144	38.4014	23.4665	12.6297	14.4937	30.6485	24.0622	14.793	4.36711	3.63964	5.76891	7.1182	16.4314	4.79454		13.9719	-0.232354	0.851245	0.478157	-0.485937	0.627012	0.698882		13.9719	3.00064	8.00355	0.560162	5.35674	8.47377e-08	4.1371e-07		13.9719	0.460537	1.37605	0.43738	1.05294	0.292366	0.470728
C17H11.2	C17H11.2	474.962	517.911	565.925	406.975	433.216	391.599	702.11	762.899	721.15	822.767	767.135	904.895	1229.44	1300.86	1097.38	1137.95	891.226	1001.7	702.013	850.464	824.955	1518.55	1582.11	1570.21		882.433	-0.340701	0.789658	0.112561	-3.02681	0.00247152	0.00586463		882.433	0.190502	1.14116	0.10934	1.74229	0.0814571	0.136759		882.433	-0.259659	0.835285	0.106964	-2.42754	0.0152018	0.0589321
C17H11.6	C17H11.6	1278.53	1865.18	2236.79	1884.73	1984.08	2014.62	1715.37	1753.95	1617.77	1993.44	1830.22	1944.69	1651.84	1708.16	1468	1505.73	1285.48	1433.86	1422.59	1245.97	1371.85	2755.93	2526.91	2605.83		1795.9	0.128242	1.09296	0.137571	0.932186	0.35124	0.434007		1795.9	0.181297	1.1339	0.138124	1.31257	0.189328	0.27657		1795.9	-0.192603	0.875025	0.138715	-1.38849	0.164989	0.322115
C17H12.10	C17H12.10	23.6065	41.9927	27.7254	36.3512	41.9994	44.6631	9.09208	11.2041	15.2141	46.9867	49.6496	54.1559	34.6896	26.3118	36.2342	57.3424	37.9442	38.0391	37.1204	24.2643	28.8446	160.159	166.661	186.987		51.5516	0.395333	1.31525	0.242478	1.63039	0.10302	0.153334		51.5516	2.08674	4.24786	0.314679	6.63131	3.32712e-11	2.27824e-10		51.5516	0.454113	1.36994	0.252073	1.80151	0.0716222	0.178676
C17H12.14	vha-8	10977	9325.89	9567.71	11705.9	11568.5	12345.3	11180.2	11305	10412.6	10033.2	10407.9	9814.03	6214.55	6865.29	6984.92	7765.94	8199.65	8601.07	13058.8	11959.9	11055.5	9061.47	9648.73	9415.27		9894.76	0.254042	1.19254	0.0803206	3.16284	0.00156236	0.00389099		9894.76	-0.120805	0.919674	0.0804745	-1.50116	0.133314	0.206546		9894.76	0.29202	1.22435	0.0808424	3.61221	0.000303596	0.00317475
C17H12.9	ceh-48	964.088	999.952	1106.57	1587.6	1598.31	1511.37	2666	2785.75	2505.26	1307.63	1414.53	1340.11	672.367	855.661	793.011	840.363	649.679	908.713	1754.49	1404.9	1534.53	1313.31	1100.9	1180.66		1366.49	0.612922	1.52935	0.120429	5.08948	3.59051e-07	2.18039e-06		1366.49	-0.969904	0.51054	0.119705	-8.10242	5.38753e-16	5.83098e-15		1366.49	0.0465699	1.03281	0.123886	0.37591	0.706984	0.826306
C18A11.1	C18A11.1	65.1538	48.9915	32.6181	139.083	111.998	141.965	3.03069	3.05567	2.02855	24.9929	26.2851	31.5089	28.5679	18.9445	22.7758	49.4331	66.6337	68.6818	9.826	3.63964	6.9227	53.3865	58.6834	45.5481		44.3231	1.43044	2.69528	0.231553	6.17758	6.50896e-10	8.72436e-09		44.3231	3.35103	10.2037	0.56734	5.90656	3.49335e-09	1.99579e-08		44.3231	1.39188	2.6242	0.280542	4.96139	6.9991e-07	2.53918e-05
C18A11.3	C18A11.3	287.055	226.586	267.469	342.965	417.66	411.538	156.586	178.247	167.356	78.9776	88.5905	83.6954	235.685	209.442	247.428	244.2	302.628	273.67	400.682	300.877	259.601	104.4	122.062	130.651		230.752	0.586206	1.50129	0.149715	3.91548	9.02248e-05	0.000303428		230.752	-0.998607	0.500483	0.176194	-5.66765	1.44767e-08	7.74028e-08		230.752	0.245047	1.18513	0.155876	1.57206	0.115935	0.250415
C18A11.5	xol-1	143.527	164.472	136.996	96.4096	90.9986	65.3995	103.044	93.7072	100.413	114.967	100.273	113.235	567.278	576.756	481.397	513.116	546.952	543.114	54.5889	92.2043	129.224	24.9137	32.8627	31.1645		204.875	-0.814914	0.568442	0.193224	-4.21747	2.47063e-05	9.44937e-05		204.875	0.144197	1.10512	0.200234	0.72014	0.471439	0.576439		204.875	-0.0198502	0.986335	0.171327	-0.115862	0.907762	0.950893
C18A11.7	dim-1	6523.88	7077.53	10504.7	8033.61	9206.42	9771.64	16628.4	18424.7	16517.5	10474	10166.5	10816.4	11091.5	12028.7	11845.5	13461.6	11898.7	14930.4	29506.4	22741.7	24562.9	11895.7	12051.2	11786.2		13414.4	0.164059	1.12043	0.143677	1.14186	0.253514	0.330394		13414.4	-0.71317	0.609978	0.143571	-4.96736	6.78709e-07	2.92411e-06		13414.4	0.204475	1.15227	0.143594	1.42398	0.154453	0.307069
C18A3.1	damt-1	952.757	725.25	428.928	463.082	453.438	387.612	127.289	108.986	141.999	128.963	144.081	123.081	24.4868	29.4693	20.7053	21.7506	25.9131	17.9629	62.2313	66.7268	42.69	79.4865	68.0728	79.1099		196.836	-0.691021	0.619415	0.215182	-3.21133	0.00132122	0.00334419		196.836	0.0665985	1.04724	0.234388	0.284137	0.776305	0.835199		196.836	-0.178425	0.883667	0.322923	-0.552532	0.580584	0.73246
C18A3.3	C18A3.3	2699.63	2195.87	1587.69	1314.17	1283.31	1143.69	1439.58	1334.31	1338.84	908.743	1008.57	983.667	540.75	543.076	486.574	453.796	429.417	473.376	795.906	930.536	881.49	755.715	825.089	640.071		1041.41	-0.792679	0.577271	0.142589	-5.55919	2.71028e-08	2.21558e-07		1041.41	-0.50352	0.705384	0.144332	-3.48863	0.000485504	0.00139898		1041.41	-0.211555	0.863606	0.150011	-1.41027	0.158461	0.312888
C18A3.4	osta-2	939.537	920.341	1236.23	1183.78	1328.42	1345.47	767.775	761.88	730.279	792.776	783.685	762.121	265.274	258.909	244.322	244.2	164.733	241.971	688.912	516.83	566.507	959.77	961.235	930.14		733.129	0.316617	1.24541	0.131561	2.40662	0.0161007	0.0304844		733.129	0.0493417	1.03479	0.134553	0.366708	0.713837	0.784455		733.129	-0.242811	0.845097	0.149229	-1.6271	0.103715	0.231991
C18A3.6	rab-3	930.094	1009.58	1350.39	1469.85	1487.09	1450.75	1119.34	1070.5	1091.36	1000.72	1136.1	1066.38	976.411	955.646	1072.53	1424.66	1382.65	1739.23	2413.92	1518.95	1773.36	1356.02	1329.77	1354.46		1311.66	0.421244	1.33908	0.147847	2.8492	0.00438297	0.00963218		1311.66	-0.0346705	0.976255	0.149047	-0.232614	0.816061	0.867055		1311.66	0.597277	1.51286	0.148668	4.01753	5.88124e-05	0.000884248
C18A3.8	hlh-14	1784.65	1470.62	1240.3	1152.96	1242.87	933.936	2228.57	2146.1	2246.62	1320.63	1246.11	1311.56	2106.89	2089.16	1628.47	1560.11	1624.2	2027.7	1144.18	1993.31	1880.67	974.007	828.61	798.291		1540.85	-0.432707	0.740871	0.179349	-2.41265	0.0158368	0.0300306		1540.85	-0.771705	0.585725	0.179205	-4.30626	1.66034e-05	6.0129e-05		1540.85	-0.160485	0.894724	0.178975	-0.896686	0.369886	0.548548
C18B12.2	seb-3	146.36	178.469	255.237	192.029	274.551	240.064	258.619	262.788	241.398	344.902	347.547	357.429	297.923	321.004	271.239	348.998	326.69	434.28	519.686	412.493	419.977	567.083	583.313	678.427		345.021	0.280981	1.21502	0.173974	1.61507	0.106295	0.157547		345.021	0.460853	1.37635	0.171834	2.68196	0.00731926	0.0165715		345.021	0.31726	1.24596	0.170543	1.86029	0.062844	0.163547
C18B12.3	dsc-1	24.5507	20.9964	23.6481	43.4634	40.4438	35.0924	48.4911	48.8907	51.7281	25.9926	46.729	35.4475	29.5882	23.1544	26.9168	26.6939	28.6895	15.8496	31.6616	16.985	21.9219	18.9819	29.3417	46.7468		31.7502	0.783296	1.72106	0.288398	2.71602	0.00660717	0.0138531		31.7502	-0.46137	0.726296	0.275887	-1.67231	0.0944622	0.155026		31.7502	-0.1525	0.89969	0.314236	-0.485302	0.627462	0.766536
C18B12.6	C18B12.6	748.797	677.133	624.637	617.97	564.658	568.656	951.637	1033.83	963.562	823.767	914.137	838.923	640.738	579.913	565.254	549.696	597.852	552.624	648.516	775.244	819.186	731.988	741.759	700.003		717.937	-0.226438	0.854742	0.0980903	-2.30847	0.0209731	0.0384568		717.937	-0.194511	0.873869	0.0964639	-2.01641	0.0437569	0.0800732		717.937	-0.0705503	0.952275	0.101051	-0.698169	0.485072	0.655998
C18B2.1	C18B2.1	3.77703	4.37424	9.78544	5.5317	3.88883	9.57066	6.06138	9.16701	5.07138	0.999717	1.94704	1.9693	13.2637	12.6297	11.3879	8.89796	18.5094	7.3965	4.36711	1.21321	0	0	0	2.39727		5.92527	0.060119	1.04255	0.586258	0.102547	0.918322	0.939011		5.92527	-2.04211	0.242809	0.822971	-2.48138	0.0130873	0.0278211		5.92527	-0.0863776	0.941885	0.522719	-0.165247	0.86875	NA
C18B2.3	C18B2.3	404.143	407.68	609.959	443.326	508.659	637.246	695.039	726.231	769.835	1301.63	1366.82	1399.19	569.318	553.601	663.604	730.621	829.219	780.859	992.426	617.526	710.73	958.584	1046.91	1076.37		783.314	0.159255	1.11671	0.171827	0.926833	0.354013	0.436951		783.314	0.892553	1.85646	0.169339	5.27081	1.35826e-07	6.42064e-07		783.314	0.389881	1.31029	0.171158	2.27791	0.0227322	0.0784905
C18B2.4	C18B2.4	959.366	868.725	936.14	867.687	856.32	912.403	984.975	981.889	1008.19	2712.23	2731.7	2534.49	558.095	573.598	580.782	1016.34	888.449	1006.98	1505.56	1418.25	1661.45	5063.41	4847.25	5453.79		1705.34	-0.0681726	0.953845	0.0817792	-0.833617	0.404497	0.487821		1705.34	1.42319	2.68177	0.0798204	17.8299	4.14361e-71	4.76327e-69		1705.34	0.765076	1.69946	0.0858569	8.91106	5.05467e-19	1.67539e-16
C18B2.5	C18B2.5	1099.12	1395.38	2372.97	1713.25	1965.41	2135.05	3044.84	3389.76	3248.73	2217.37	2247.86	2200.7	2831.29	3009.02	3212.42	4032.75	2990.19	3776.44	5068.03	3757.33	3624.03	5222.38	5560.84	6057.9		3173.88	0.25575	1.19396	0.195822	1.30603	0.191541	0.261253		3173.88	-0.538692	0.688395	0.195485	-2.75566	0.00585731	0.0135445		3173.88	0.254461	1.19289	0.195237	1.30334	0.192459	0.357647
C18C4.2	cft-1	73.6521	74.3622	94.5926	117.746	119.776	132.394	326.305	313.715	299.211	194.945	220.016	250.102	372.403	358.894	332.319	380.635	362.783	380.391	110.27	69.1533	79.611	69.9956	80.9832	53.9386		202.841	0.603576	1.51948	0.158594	3.80579	0.00014135	0.000454214		202.841	-0.497743	0.708214	0.136209	-3.65427	0.000257915	0.000775891		202.841	0.0790378	1.05631	0.130692	0.604763	0.545337	0.705445
C18C4.9	glb-6	62.321	53.3658	92.1462	75.8633	108.109	82.1481	94.9617	93.7072	73.0279	113.968	123.637	117.174	300.984	337.844	253.639	274.848	244.324	322.276	108.086	84.925	94.6102	196.937	167.835	160.617		151.556	0.351268	1.27568	0.200304	1.75367	0.0794869	0.122771		151.556	0.439176	1.35583	0.197645	2.22204	0.0262803	0.0512041		151.556	-0.086209	0.941995	0.173435	-0.497067	0.619142	0.759553
C18D1.3	flp-4	52.8785	34.1191	44.8499	54.5268	44.3327	54.2337	104.054	86.5773	105.485	206.941	180.101	170.345	98.9675	64.2009	61.0805	106.776	122.162	122.571	200.887	178.343	182.298	830.456	730.022	996.065		201.345	0.218723	1.1637	0.213527	1.02433	0.305677	0.386592		201.345	0.912117	1.8818	0.17835	5.11419	3.15088e-07	1.41485e-06		201.345	0.646785	1.56568	0.190943	3.38732	0.000705796	0.00597754
C18D11.1	C18D11.1	1869.63	1681.46	1731.21	2685.25	2744.74	2927.03	1403.21	1454.5	1466.64	2132.4	2210.87	2012.63	1465.13	1485.04	1533.22	1884.39	1640.85	1611.38	1291.57	1027.59	1159.55	1187.55	1234.7	1196.24		1709.87	0.66208	1.58236	0.0836931	7.91081	2.55715e-15	1.61209e-13		1709.87	0.555637	1.46982	0.0852834	6.51518	7.26023e-11	4.84462e-10		1709.87	0.196312	1.14577	0.0856984	2.29074	0.0219787	0.0769313
C18D11.2	maa-1	374.871	256.331	217.726	335.063	272.218	299.083	100.013	95.7443	97.3705	71.9796	65.2259	66.9563	69.3793	63.1484	46.5868	48.4445	58.3045	48.6056	65.5067	58.2343	98.0715	121.009	119.714	113.87		131.811	0.0968619	1.06944	0.184422	0.525219	0.599431	0.674916		131.811	-0.522103	0.696356	0.217486	-2.40063	0.0163667	0.0337981		131.811	-0.202834	0.868842	0.235167	-0.86251	0.388407	0.567361
C18D11.3	C18D11.3	1975.39	1814.44	1436.83	1150.59	1053.87	1079.09	3712.6	3690.23	3987.12	2378.33	2185.56	2150.48	1646.74	1873.4	1874.86	1403.9	1480.75	1644.14	1262.1	1665.74	1702.98	613.351	620.871	575.345		1790.78	-0.670128	0.628451	0.12178	-5.50276	3.73896e-08	2.96842e-07		1790.78	-0.762464	0.589489	0.120299	-6.33807	2.32657e-10	1.49338e-09		1790.78	-0.252665	0.839345	0.121802	-2.07439	0.0380428	0.114584
C18D11.4	rsp-8	3078.28	3696.24	5115.34	1812.82	1911.75	1955.6	2011.37	1916.92	2237.49	2008.43	1644.28	1810.77	2029.34	1940.76	1771.33	1438.5	1523.32	1076.72	2555.85	4306.91	3559.42	1460.42	1298.08	1190.24		2222.93	-1.0659	0.477676	0.181163	-5.88361	4.01403e-09	4.24757e-08		2222.93	-0.174495	0.886078	0.181922	-0.959174	0.337471	0.443051		2222.93	-0.50726	0.703558	0.182382	-2.7813	0.00541418	0.0280002
C18D11.7	C18D11.7	7.55407	13.9976	14.6782	21.3366	17.1109	16.7486	1.01023	1.01856	1.01428	0	0	0	3.06085	4.20989	2.07053	2.96599	0.925468	1.05664	0	0	0	0	0	0		4.5316	0.599009	1.51468	0.481646	1.24367	0.213621	0.286277		4.5316	-2.48368	0.178787	1.49449	-1.6619	0.0965335	0.157854		4.5316	-0.917126	0.529563	0.894187	-1.02565	0.305055	NA
C18E3.1	C18E3.1	16.0524	25.3706	7.33908	8.69267	11.6665	5.58288	13.133	11.2041	21.2998	10.9969	15.5763	14.7698	39.7911	27.3643	33.1284	16.8073	27.764	26.4161	8.73422	14.5586	20.7681	34.4046	19.9524	19.1782		18.773	-0.899629	0.536025	0.434389	-2.07102	0.0383569	0.064629		18.773	-0.141538	0.906552	0.428666	-0.330182	0.741263	0.807112		18.773	-0.49868	0.707754	0.371992	-1.34057	0.180061	0.342209
C18E3.3	C18E3.3	1000.91	1138.18	1019.32	866.896	869.542	837.432	463.696	429.831	439.181	527.851	464.37	559.282	77.5415	102.09	104.562	81.0703	53.6771	90.8713	300.239	407.64	303.445	1771.24	1778.11	1583.4		636.266	-0.295302	0.814902	0.125153	-2.35952	0.0182986	0.0340383		636.266	0.219169	1.16406	0.131735	1.66371	0.0961707	0.157324		636.266	-0.340861	0.78957	0.176679	-1.92926	0.0536984	0.145727
C18E3.8	hop-1	654.371	509.162	403.649	300.292	272.996	226.506	557.647	422.701	576.109	531.849	533.49	556.328	272.416	266.276	491.75	232.336	225.814	175.403	109.178	209.886	143.069	52.2001	59.8571	38.3563		325.902	-0.969706	0.51061	0.238727	-4.06198	4.86582e-05	0.000173995		325.902	0.059189	1.04188	0.237474	0.249244	0.803172	0.856694		325.902	-0.700922	0.615179	0.243136	-2.88284	0.00394106	0.0223296
C18E9.10	sftd-3	1955.56	1282.53	922.278	1168.77	1149.54	1018.48	680.896	674.284	754.621	605.829	609.425	635.1	405.053	367.313	341.637	389.533	406.28	325.446	667.076	980.278	796.11	480.478	509.372	559.762		736.902	-0.317576	0.802417	0.188201	-1.68743	0.0915203	0.138707		736.902	-0.189304	0.877029	0.191306	-0.989535	0.322401	0.42711		736.902	0.00996193	1.00693	0.195603	0.0509294	0.959382	0.982558
C18E9.11	ooc-5	4082.97	3148.58	2072.07	2226.11	2083.64	1816.03	586.944	557.15	593.351	439.875	482.867	495.28	1219.24	1131.41	1278.55	1027.22	1187.38	943.582	513.136	727.929	593.044	452.006	433.084	417.125		1187.86	-0.602589	0.658571	0.173609	-3.47095	0.00051863	0.0014515		1187.86	-0.29304	0.81618	0.179828	-1.62956	0.103195	0.166831		1187.86	-0.200271	0.870387	0.175847	-1.13889	0.25475	0.431907
C18E9.2	C18E9.2	4008.38	3432.91	2147.09	2840.13	2699.63	2613.59	4349.04	4306.46	4144.33	3303.07	3299.26	3222.77	1722.24	1507.14	1536.33	1478.05	1593.66	1974.87	917.093	778.884	939.179	708.261	725.327	551.372		2283.29	-0.233608	0.850505	0.165309	-1.41316	0.157608	0.221133		2283.29	-0.381582	0.767595	0.165254	-2.30907	0.0209398	0.0418521		2283.29	0.0823634	1.05875	0.166721	0.494019	0.621293	0.761423
C18E9.3	szy-20	2242.61	2586.93	2677.95	1543.34	1539.98	1481.86	3140.81	3004.74	3357.25	2951.16	2719.05	2774.75	2510.92	2595.4	2673.05	2276.89	2331.25	2415.49	2118.05	2903.22	2770.23	3283.86	3665.37	3366.96		2622.13	-0.71794	0.607965	0.101962	-7.04125	1.90522e-12	5.40951e-11		2622.13	-0.170292	0.888663	0.101285	-1.68132	0.0927001	0.152789		2622.13	-0.14749	0.90282	0.101804	-1.44877	0.147401	0.296815
C18E9.4	C18E9.4	4295.43	3414.54	1665.97	3341.15	2690.29	3413.53	604.118	694.656	617.694	605.829	690.227	622.3	712.158	624.117	584.924	830.476	1021.72	843.201	1449.88	1465.56	1331.47	758.088	947.151	794.695		1417.47	0.010828	1.00753	0.211797	0.0511244	0.959226	0.969976		1417.47	0.00147105	1.00102	0.216011	0.00681006	0.994566	0.998515		1417.47	0.48865	1.40313	0.215351	2.26908	0.0232633	0.079716
C18E9.5	C18E9.5	336.156	269.453	240.559	466.243	495.437	560.681	465.716	438.998	400.639	239.932	276.48	265.856	332.612	336.792	310.579	378.658	410.908	390.958	393.04	287.532	294.215	136.432	174.877	148.631		335.474	0.849843	1.80231	0.136977	6.2043	5.4941e-10	7.61158e-09		335.474	-0.738495	0.599364	0.140578	-5.25326	1.49431e-07	7.03308e-07		335.474	0.268916	1.2049	0.139524	1.92737	0.0539329	0.146108
C18E9.6	tomm-40	1778.04	1849.43	1502.88	1464.32	1434.2	1428.42	3791.4	3851.16	3817.73	5541.43	5663.95	5255.09	3195.53	2897.46	2853.18	3022.34	3107.72	3785.95	2772.02	3602.04	2795.62	5791.84	5620.7	5813.38		3443.16	-0.245382	0.843592	0.109204	-2.247	0.0246397	0.0441356		3443.16	0.522364	1.43631	0.107233	4.87131	1.10861e-06	4.66502e-06		3443.16	0.148222	1.1082	0.107884	1.37391	0.16947	0.327851
C18E9.7	C18E9.7	375.815	485.541	754.294	635.355	717.1	743.321	962.75	1022.63	920.963	627.822	532.516	611.469	1531.45	1590.29	1560.14	1891.31	1556.64	1774.1	1161.65	804.362	851.492	549.288	572.75	532.194		948.552	0.373656	1.29563	0.179048	2.0869	0.036897	0.0624095		948.552	-0.714049	0.609607	0.17897	-3.98977	6.61374e-05	0.000220058		948.552	0.15744	1.11531	0.17607	0.894186	0.371222	0.549858
C18E9.8	C18E9.8	0.944258	0	0	0	0.777766	0	21.2148	33.6124	28.3997	10.9969	11.6823	12.8005	1.02028	0	1.03526	0.988662	0	0	3.27533	3.63964	2.30757	3.5591	2.34734	4.79454		5.97485	-0.152867	0.899461	1.69855	-0.0899986	0.928288	0.945964		5.97485	-1.22956	0.426449	0.439449	-2.79795	0.00514277	0.0120389		5.97485	-0.96241	0.513199	1.59329	-0.604038	0.545818	NA
C18E9.9	C18E9.9	779.957	538.907	520.259	1147.43	1018.1	1152.47	300.039	294.363	277.912	292.917	303.739	266.841	700.935	660.953	575.606	906.603	749.629	794.595	1040.46	866.235	813.417	998.92	913.114	889.387		700.116	0.852771	1.80597	0.139538	6.11139	9.87701e-10	1.25081e-08		700.116	-0.0146274	0.989912	0.150925	-0.0969183	0.922791	0.949704		700.116	0.338891	1.26478	0.141193	2.4002	0.016386	0.0622325
C18F10.2	C18F10.2	3.77703	3.4994	4.07727	7.11219	6.99989	7.97555	1.01023	2.03711	1.01428	5.9983	11.6823	15.7544	16.3245	8.41979	9.31737	13.8413	16.6584	12.6797	6.55067	3.63964	10.384	8.30456	10.563	10.7877		8.26703	0.957416	1.94183	0.562949	1.70071	0.0889966	0.135471		8.26703	3.0448	8.25232	0.814789	3.73692	0.000186291	0.000575485		8.26703	0.343808	1.2691	0.43928	0.782662	0.433825	0.610712
C18F10.6	srg-3	0	0	1.63091	2.37073	0.777766	1.59511	3.03069	4.07423	4.0571	3.99887	4.86761	3.93861	13.2637	8.41979	13.4584	5.93197	12.9566	14.793	0	2.42643	1.15378	3.5591	4.69468	7.19181		4.92462	1.44134	2.71573	1.23575	1.16636	0.243467	0.319146		4.92462	0.199386	1.14821	0.695978	0.286484	0.774508	0.833857		4.92462	-0.0652519	0.955778	0.507488	-0.128578	0.897691	NA
C18F10.7	C18F10.7	2117.03	2065.52	1452.32	1170.35	1097.43	1154.06	524.31	438.998	514.238	643.818	658.101	580.945	532.588	542.024	550.76	573.424	561.759	514.585	658.342	868.662	701.5	1142.47	1151.37	1173.46		891.169	-0.719135	0.607462	0.12715	-5.65578	1.55136e-08	1.37061e-07		891.169	0.349681	1.27428	0.133723	2.61496	0.00892372	0.0198024		891.169	0.0218988	1.01529	0.133934	0.163505	0.870121	0.928706
C18F3.2	sax-7	5011.18	7045.16	9305.95	6076.97	6255.57	5759.14	19576.3	18827	19204.3	15489.6	13508.6	15250.3	8908.09	9290.19	10105.2	7238	5552.81	7631.07	9316.14	10433.6	9383.72	4575.81	4705.24	4546.42		9708.18	-0.239887	0.846812	0.155079	-1.54687	0.121895	0.177105		9708.18	-0.380633	0.7681	0.154778	-2.45922	0.0139241	0.0293531		9708.18	-0.470943	0.721493	0.155082	-3.03674	0.00239155	0.0151851
C18F3.4	nsy-7	3035.79	2297.35	1695.33	2525.62	2214.3	2112.72	828.389	855.588	817.506	440.875	528.622	450.971	2169.12	2017.59	1800.32	1867.58	1912.94	2036.15	1086.32	1147.7	1163.01	834.015	881.425	813.873		1480.55	-0.0360562	0.975317	0.146077	-0.246829	0.80504	0.847177		1480.55	-0.816274	0.567907	0.152077	-5.36749	7.98396e-08	3.9156e-07		1480.55	-0.0417323	0.971488	0.146811	-0.284259	0.776212	0.872311
C18G1.1	C18G1.1	167.134	121.604	143.52	229.961	216.219	267.978	79.8082	87.5959	91.2848	152.957	148.949	128.989	51.0142	56.8336	54.8689	98.8662	93.4723	87.7014	257.66	201.394	207.681	358.283	321.585	350.001		165.64	0.726365	1.65446	0.141551	5.13146	2.87506e-07	1.79126e-06		165.64	0.736101	1.66567	0.162583	4.52754	5.96732e-06	2.29701e-05		165.64	0.784825	1.72288	0.184682	4.24959	2.14159e-05	0.00040668
C18H7.1	C18H7.1	16.9966	16.6221	33.4336	13.4341	10.111	16.7486	23.2353	41.7608	23.3283	253.928	288.162	331.828	69.3793	55.7811	125.267	153.243	164.733	224.008	31.6616	23.0511	21.9219	656.061	726.501	692.811		167.25	-0.749065	0.594989	0.350884	-2.13479	0.032778	0.0565874		167.25	3.30726	9.89886	0.285703	11.5759	5.46128e-31	1.56358e-29		167.25	1.11223	2.1618	0.260343	4.27218	1.93567e-05	0.000373286
C18H9.1	C18H9.1	11.3311	6.12394	9.78544	17.3853	13.9998	15.9511	32.3274	42.7794	18.257	9.99717	8.76169	17.7237	34.6896	15.7871	31.0579	38.5578	34.2423	53.8888	10.9178	7.27929	5.76891	5.93183	8.21568	3.5959		18.9315	0.800775	1.74204	0.42539	1.88245	0.0597747	0.095565		18.9315	-1.35554	0.390788	0.397505	-3.41012	0.000649339	0.0018206		18.9315	0.629356	1.54687	0.349074	1.80293	0.071399	0.17818
C18H9.3	gyf-1	740.299	1113.68	1568.93	734.926	829.099	755.284	3508.53	3181.97	3378.55	2836.2	2548.68	2824.97	3242.46	3393.18	3985.76	2577.44	2029.55	2619.42	3317.91	4792.2	3768.25	2082.07	2098.52	2339.73		2511.15	-0.562276	0.677233	0.188383	-2.98475	0.00283812	0.00664133		2511.15	-0.294514	0.815347	0.186297	-1.58088	0.113905	0.181101		2511.15	-0.555746	0.680305	0.186374	-2.98189	0.00286474	0.0175691
C18H9.5	C18H9.5	11.3311	13.1227	8.15453	12.6439	13.222	11.1658	12.1228	6.11134	10.1428	112.968	110.981	115.204	13.2637	21.0495	13.4584	33.6145	39.7951	36.9825	28.3862	9.70572	10.384	211.173	206.566	252.912		54.7692	0.19253	1.14277	0.355873	0.541008	0.588502	0.665229		54.7692	3.57805	11.9427	0.326399	10.9622	5.80609e-28	1.41188e-26		54.7692	1.21273	2.31776	0.299973	4.04281	5.28142e-05	0.000815935
C18H9.7	rpy-1	340.877	358.688	627.899	475.726	500.104	552.705	694.029	732.342	699.85	540.847	626.948	544.513	901.931	941.964	917.243	1079.62	925.468	923.506	1140.91	669.695	857.261	696.397	701.854	714.386		715.198	0.201705	1.15006	0.187298	1.07692	0.281516	0.361567		715.198	-0.312281	0.805367	0.18661	-1.67344	0.0942408	0.154729		715.198	0.0849674	1.06066	0.184707	0.460012	0.645508	0.779312
C18H9.8	ift-74	130.308	125.978	168.799	198.351	253.552	262.395	150.524	188.433	133.884	109.969	89.564	102.404	192.834	236.807	219.476	251.12	213.783	228.235	61.1396	29.1172	69.227	79.4865	83.3305	70.7194		152.06	0.746521	1.67774	0.182846	4.08279	4.44987e-05	0.000161083		152.06	-0.647421	0.638421	0.195216	-3.31643	0.000911747	0.00248828		152.06	0.0946178	1.06778	0.182046	0.519746	0.60324	0.750014
C23F12.1	fln-2	3284.13	5832.62	12154.3	7296.31	8056.88	7150.87	20425.9	22540.7	19634.4	19610.4	17135.9	19284.4	13316.7	15492.4	13581.6	13752.3	8263.5	13433.1	5404.3	4997.23	5345.48	7355.47	6604.24	7118.69		11544.7	0.0811919	1.05789	0.270911	0.2997	0.764406	0.813507		11544.7	-0.159964	0.895047	0.270747	-0.590825	0.554638	0.650794		11544.7	-0.258029	0.836229	0.270819	-0.952775	0.340704	0.519881
C23F12.4	C23F12.4	1082.12	787.364	559.401	1070.78	855.543	874.917	303.069	330.012	320.511	328.907	374.806	300.319	577.48	533.604	490.715	671.302	738.523	785.086	495.667	396.721	426.9	493.528	494.115	545.379		576.532	0.206948	1.15424	0.169442	1.22135	0.221954	0.295317		576.532	0.0744837	1.05298	0.177847	0.418808	0.675356	0.753297		576.532	0.454282	1.3701	0.172212	2.63793	0.00834135	0.0380648
C23G10.10	C23G10.10	9.44258	9.62334	8.96998	16.5951	10.8887	19.9389	0	1.01856	1.01428	0.999717	6.81465	8.86187	5.10142	3.15742	2.07053	9.88662	5.55281	6.33986	3.27533	0	1.15378	2.37273	0	0		5.54492	0.757994	1.69114	0.500831	1.51347	0.13016	0.187604		5.54492	3.04343	8.24449	1.14642	2.65473	0.00793728	0.0177968		5.54492	1.07132	2.10135	0.673783	1.59	0.111834	NA
C23G10.2	C23G10.2	2032.99	1449.62	792.62	1795.43	1465.31	1645.36	235.384	205.748	248.498	181.948	191.784	176.253	839.693	703.052	721.578	960.98	941.201	926.676	766.428	634.511	655.349	564.71	572.75	652.057		806.664	0.199185	1.14805	0.204508	0.973976	0.330069	0.412115		806.664	-0.326416	0.797515	0.218755	-1.49216	0.135658	0.20945		806.664	0.321097	1.24928	0.206741	1.55314	0.120391	0.256692
C23G10.3	rps-3	23471.4	17518	10768.1	22066	23156.4	23238.3	13680.5	14141.6	14624.8	10326.1	9898.77	10379.2	11135.4	12199.2	10331.9	10657.8	9591.55	9251.96	21196.9	18090.2	19883.1	20164.7	20799.8	22071.7		15776.8	0.403574	1.32278	0.169221	2.38489	0.0170844	0.0321094		15776.8	-0.471942	0.720994	0.169391	-2.78611	0.00533454	0.0124533		15776.8	-0.190527	0.876285	0.169442	-1.12444	0.260826	0.436626
C23G10.4	rpn-2	5396.44	5805.5	5190.36	3232.09	3281.39	3421.51	7352.46	6701.08	7335.24	7542.86	7019.09	7364.21	5040.2	4957.15	5758.13	3794.49	3410.35	3417.18	6580.14	10163.1	8216.09	8102.88	7918.74	8107.56		6046.18	-0.722412	0.606083	0.115498	-6.25476	3.98123e-10	5.77206e-09		6046.18	0.0357898	1.02512	0.115132	0.310859	0.755908	0.818244		6046.18	-0.568799	0.674178	0.115732	-4.91478	8.88809e-07	3.10105e-05
C23G10.7	C23G10.7	1214.32	1147.8	866.827	688.302	645.546	570.252	680.896	571.41	648.122	418.881	376.753	372.198	792.76	749.361	1036.3	618.903	726.492	593.833	522.962	706.091	718.807	1328.73	1481.17	1300.52		782.385	-0.76136	0.58994	0.152632	-4.98821	6.09418e-07	3.45802e-06		782.385	-0.702624	0.614454	0.157279	-4.46738	7.91843e-06	2.99936e-05		782.385	-0.410464	0.752382	0.154165	-2.6625	0.0077563	0.036279
C23G10.8	C23G10.8	4843.1	5298.96	5027.27	3669.89	3535.72	3297.09	3763.11	3607.73	3954.66	3493.01	3140.58	3383.26	2874.14	3105.85	3000.19	2114.75	2254.44	2193.59	1869.12	2894.73	2701.01	1823.44	1867.31	1589.39		3137.6	-0.530414	0.692356	0.118279	-4.48442	7.31112e-06	3.20492e-05		3137.6	-0.177166	0.884438	0.118762	-1.49177	0.135759	0.20952		3137.6	-0.452381	0.730836	0.119446	-3.78733	0.000152277	0.00184146
C23H3.1	egl-26	1134.05	1157.43	1131.85	1127.68	1081.87	1079.89	1503.22	1597.1	1433.17	1234.65	1424.26	1282.02	1698.77	1886.03	1599.48	1631.29	1765.79	1348.28	1821.09	1914.45	2017.97	3000.32	2773.38	2970.22		1650.59	-0.0575584	0.960889	0.0969665	-0.59359	0.552786	0.632448		1650.59	-0.201975	0.86936	0.0967277	-2.08808	0.0367909	0.0689727		1650.59	-0.126758	0.915887	0.0960197	-1.32012	0.186794	0.350514
C23H3.2	C23H3.2	193.573	167.971	240.559	300.292	328.217	293.5	538.453	558.169	465.553	657.814	808.023	680.394	300.984	234.702	226.723	412.272	379.442	459.64	205.254	127.388	161.53	781.815	793.4	806.681		421.764	0.61303	1.52947	0.156844	3.90853	9.28589e-05	0.000310881		421.764	0.458373	1.37399	0.148656	3.08346	0.00204609	0.00519535		421.764	0.713558	1.63984	0.155774	4.58071	4.63394e-06	0.000123324
C23H3.3	ascc-1	873.439	734.873	463.993	632.985	529.659	533.564	330.345	321.864	257.626	382.892	344.627	342.659	197.935	184.183	198.77	191.8	190.646	166.95	235.824	219.592	234.218	482.851	497.636	477.057		376.083	-0.287561	0.819286	0.163213	-1.76188	0.0780899	0.120865		376.083	0.234068	1.17615	0.170371	1.37387	0.169482	0.252278		376.083	-0.0795746	0.946337	0.179573	-0.443133	0.657669	0.78955
C23H4.1	cab-1	1042.46	1074.31	1234.6	1524.38	1560.98	1619.83	831.42	794.474	896.62	4959.6	4263.05	4699.74	624.413	665.163	691.556	854.204	703.356	981.621	1088.5	810.428	841.108	5261.53	5333.15	6489.41		2035.25	0.489111	1.40358	0.129697	3.77117	0.000162485	0.000511638		2035.25	2.46445	5.51915	0.130046	18.9506	4.36231e-80	6.75446e-78		2035.25	0.357122	1.28087	0.133521	2.67464	0.00748091	0.0352851
C23H4.8	C23H4.8	96.3143	59.4897	44.0345	180.966	165.664	208.959	55.5627	45.835	40.571	307.913	355.335	290.472	81.6227	93.6702	83.8563	105.787	128.64	114.117	257.66	195.328	178.836	606.233	725.327	704.797		213.625	1.48581	2.80074	0.20285	7.32467	2.39481e-13	9.18299e-12		213.625	2.7479	6.7174	0.214503	12.8106	1.43061e-37	5.32062e-36		213.625	0.429083	1.34638	0.207887	2.06402	0.0390161	0.11641
C23H5.15	C23H5.15	0.944258	0	0	0	0	0	3.03069	1.01856	1.01428	1.99943	2.92056	1.9693	19.3854	13.6822	16.5642	10.8753	16.6584	13.7364	0	0	3.46135	0	1.17367	0		4.51808	-1.11466	0.461799	1.71193	-0.651113	0.514973	0.596646		4.51808	0.444176	1.36054	0.932412	0.476373	0.633809	0.71879		4.51808	-0.264479	0.8325	0.498773	-0.530258	0.595933	NA
C23H5.8	C23H5.8	287.999	319.32	259.314	105.893	72.3322	83.7432	9.09208	12.2227	11.157	2.99915	2.92056	0.984652	73.4604	63.1484	48.6574	58.3311	67.5592	65.5119	63.3231	72.7929	72.6883	113.891	105.63	122.261		87.3013	-1.7259	0.302311	0.167876	-10.2808	8.60306e-25	1.99994e-22		87.3013	-2.2338	0.212598	0.618205	-3.61336	0.000302256	0.000898243		87.3013	0.0469149	1.03305	0.205398	0.22841	0.819328	0.899915
C23H5.9	grl-20	18.8852	16.6221	16.3091	13.4341	17.1109	15.9511	2.02046	2.03711	7.09993	1.99943	1.94704	3.93861	3.06085	1.05247	2.07053	3.95465	5.55281	7.3965	50.2218	25.4775	40.3824	2.37273	2.34734	0		10.8852	-0.153428	0.899111	0.383571	-0.4	0.689156	0.749289		10.8852	-0.500569	0.706828	0.725229	-0.690223	0.490054	0.593091		10.8852	1.43638	2.70642	0.738889	1.94398	0.051898	0.141844
C24A1.1	flp-24	263.448	195.966	136.181	367.463	310.329	396.385	232.353	228.157	250.526	566.84	567.563	606.546	118.353	98.9325	101.456	203.664	248.951	233.518	220.539	177.129	145.377	616.91	592.703	658.05		314.056	0.854967	1.80872	0.175838	4.86226	1.16055e-06	6.18433e-06		314.056	1.29188	2.44846	0.174536	7.40177	1.3438e-13	1.15857e-12		314.056	1.10603	2.15253	0.189945	5.82292	5.78296e-09	3.94106e-07
C24A1.2	elf-1	741.243	695.505	976.913	1156.92	1140.2	1107.8	1458.77	1853.77	1465.63	435.877	494.549	471.648	1031.51	1231.39	1091.17	1528.47	1093.9	1644.14	1258.82	854.103	898.797	256.255	251.165	212.158		972.946	0.495881	1.41018	0.168934	2.93535	0.00333167	0.00760254		972.946	-1.7688	0.293452	0.170895	-10.3502	4.17512e-25	8.51522e-24		972.946	0.346787	1.27173	0.1686	2.05687	0.039699	0.117869
C24A1.3	sel-15	375.815	401.556	578.972	531.833	518.77	575.037	869.809	930.961	705.936	702.801	702.883	705.011	711.138	803.037	721.578	807.737	774.617	593.833	1242.44	949.947	1026.87	885.029	845.042	892.983		743.901	0.259496	1.19706	0.154094	1.68401	0.0921795	0.13946		743.901	-0.248063	0.842026	0.15233	-1.62846	0.103427	0.1671		743.901	-0.0382264	0.973851	0.152646	-0.250424	0.802259	0.889388
C24A11.8	frm-4	1490.98	1870.43	2184.6	1412.16	1457.53	1411.67	4323.79	4139.41	4620.03	7189.96	7083.34	7034.35	2912.91	3065.86	3704.17	2979.83	2702.37	3119.21	2433.57	2637.53	2461.02	3658.75	3699.4	3678.61		3386.31	-0.374038	0.77162	0.114171	-3.27613	0.00105239	0.00273446		3386.31	0.70365	1.62862	0.11216	6.2736	3.52786e-10	2.23421e-09		3386.31	-0.137866	0.908862	0.113045	-1.21957	0.222628	0.393457
C24A11.9	coq-1	452.3	483.791	494.98	450.438	448.771	440.25	421.266	479.74	427.01	656.814	714.565	655.778	628.495	659.901	666.709	893.751	915.288	1003.81	1018.63	1148.91	861.876	1204.16	1129.07	1179.46		726.49	-0.0962108	0.935487	0.101098	-0.951657	0.341271	0.423543		726.49	0.610369	1.52665	0.101599	6.00764	1.8824e-09	1.10711e-08		726.49	0.524378	1.43831	0.0977538	5.36427	8.12768e-08	3.82368e-06
C24A3.1	C24A3.1	5.66555	6.99879	18.7554	9.48291	10.8887	11.1658	11.1125	14.2598	24.3426	21.9938	13.6293	25.6009	22.4462	21.0495	22.7758	28.6712	22.2112	25.3594	28.3862	19.4114	28.8446	24.9137	37.5574	22.7741		19.929	-0.0224064	0.984589	0.415101	-0.0539784	0.956952	0.968672		19.929	0.299392	1.23063	0.373305	0.802003	0.422551	0.52798		19.929	0.200141	1.14881	0.35057	0.570902	0.568066	0.723174
C24A3.4	C24A3.4	239.842	188.093	201.417	260.78	234.108	228.101	229.322	215.934	208.941	147.958	180.101	166.406	166.306	152.609	140.796	139.401	134.193	134.194	149.574	171.063	153.453	213.546	234.734	227.741		188.275	0.2027	1.15085	0.119533	1.69576	0.0899304	0.136641		188.275	-0.403307	0.756123	0.128406	-3.14086	0.00168452	0.00435152		188.275	-0.173226	0.886857	0.13729	-1.26175	0.207037	0.375285
C24A3.6	twk-18	730.856	751.495	880.689	1191.69	1155.76	1280.08	1724.46	1762.1	1563	1777.5	1867.21	1837.36	898.87	929.334	860.303	1156.73	1097.61	1320.8	2634.46	1863.5	2081.42	2987.27	3082.05	3267.48		1612.58	0.617552	1.53427	0.115471	5.34812	8.88734e-08	6.40629e-07		1612.58	0.118583	1.08567	0.113581	1.04404	0.296467	0.399236		1612.58	0.410706	1.32934	0.116133	3.53651	0.000405446	0.00394963
C24B5.1	C24B5.1	103.868	83.9855	111.717	167.531	168.775	157.118	203.056	214.915	210.969	252.928	226.831	260.933	89.7849	92.6177	75.5742	133.469	128.64	101.438	296.964	191.688	215.757	336.928	300.459	318.837		185.199	0.718976	1.64601	0.160409	4.48215	7.38952e-06	3.22787e-05		185.199	0.235823	1.17758	0.149817	1.57407	0.115472	0.18309		185.199	0.49799	1.41224	0.174148	2.85958	0.00424198	0.0234059
C24B5.2	spas-1	1988.61	2022.65	1499.62	1243.05	1175.98	1175.6	2327.57	2180.73	2472.8	2128.4	2143.69	2070.72	1430.44	1353.48	1408.99	1146.85	1333.6	1049.25	960.764	1162.26	1136.48	1085.53	1073.91	1021.24		1524.68	-0.615954	0.652498	0.11187	-5.50597	3.6715e-08	2.9211e-07		1524.68	-0.138337	0.908566	0.111142	-1.24469	0.213247	0.304633		1524.68	-0.247748	0.84221	0.113245	-2.18772	0.02869	0.0924062
C24B5.3	ptr-1	618.489	744.496	778.758	1488.82	1483.98	1504.19	778.888	839.291	752.593	1066.7	1107.87	1133.33	1135.58	1096.68	938.983	1140.92	1022.64	1053.47	800.273	581.13	636.888	1288.39	1348.55	1290.93		1026.33	1.06265	2.08876	0.109742	9.68314	3.5563e-22	5.87895e-20		1026.33	0.480608	1.39533	0.111064	4.3273	1.50945e-05	5.49795e-05		1026.33	0.0205696	1.01436	0.110203	0.186651	0.851934	0.917707
C24B5.4	C24B5.4	523.119	418.178	334.336	974.369	823.654	754.487	318.223	346.309	302.254	205.942	216.122	192.992	489.736	475.718	468.974	471.592	463.659	464.923	153.941	121.321	149.992	154.228	167.835	130.651		380.106	1.00295	2.00409	0.139403	7.19462	6.2636e-13	2.14723e-11		380.106	-0.652373	0.636233	0.151248	-4.31327	1.60856e-05	5.83932e-05		380.106	-0.0349115	0.976092	0.142585	-0.244848	0.806574	0.891683
C24B9.3	C24B9.3	355.041	349.065	375.108	218.107	230.997	255.217	40.4092	30.5567	35.4997	26.9924	24.338	38.4014	51.0142	67.3583	71.4331	181.914	176.764	182.799	930.195	772.818	663.425	378.451	407.263	397.947		260.88	-0.616162	0.652404	0.135748	-4.53901	5.65181e-06	2.53735e-05		260.88	-0.247334	0.842452	0.238959	-1.03505	0.300645	0.403634		260.88	1.51316	2.85434	0.17198	8.79844	1.38733e-18	3.89092e-16
C24D10.4	C24D10.4	1879.07	1458.37	999.746	1020.99	1116.87	970.624	782.929	781.233	908.791	769.782	796.341	797.568	156.103	161.028	163.572	115.673	160.106	218.725	558.99	678.187	638.042	363.028	376.748	364.385		676.538	-0.47997	0.716993	0.181529	-2.64404	0.00819236	0.0167794		676.538	-0.0651825	0.955824	0.183644	-0.354939	0.722635	0.791945		676.538	0.0384949	1.02704	0.201647	0.190903	0.848602	0.916063
C24F3.1	tram-1	5818.52	5648.02	4733.71	4695.62	4504.82	4383.36	8477.86	8285.96	8296.78	6232.24	6414.53	6373.65	6198.22	6489.55	6773.73	5301.21	4935.52	4925.01	8753.87	10143.7	9803.69	5004.09	4809.7	4656.7		6319.17	-0.253873	0.838642	0.0791074	-3.20922	0.00133096	0.00336654		6319.17	-0.397866	0.75898	0.0788446	-5.04621	4.50669e-07	1.98101e-06		6319.17	-0.360171	0.779072	0.07919	-4.54819	5.41086e-06	0.000140914
C24F3.3	nas-12	114.255	76.9867	85.6226	125.649	131.442	151.535	102.033	64.1691	102.442	58.9833	92.4846	87.634	320.369	301.007	299.191	371.737	446.076	409.977	112.453	63.0872	91.1488	27.2864	14.084	15.5823		152.718	0.564687	1.47907	0.20862	2.70677	0.00679404	0.0142105		152.718	-0.167392	0.890451	0.222103	-0.753671	0.451047	0.556811		152.718	0.415663	1.33391	0.192135	2.16339	0.0305108	0.097155
C24F3.4	qns-1	932.927	993.828	747.771	658.272	652.546	681.112	401.062	399.274	365.139	405.885	357.282	387.953	298.943	299.955	308.508	300.553	279.491	267.331	996.793	1105.24	1041.87	831.643	927.198	848.633		603.717	-0.424191	0.745257	0.100641	-4.21487	2.4992e-05	9.5439e-05		603.717	-0.018115	0.987522	0.110525	-0.1639	0.86981	0.910045		603.717	-0.0982387	0.934173	0.115872	-0.847819	0.396539	0.575435
C24G6.1	syp-2	1236.03	794.363	445.237	437.004	384.216	314.237	68.6957	55.0021	63.8994	50.9856	53.5437	52.1866	274.456	241.016	325.073	194.766	268.386	212.385	335.176	560.505	326.521	58.1319	48.1204	40.7536		285.029	-1.12377	0.458893	0.265423	-4.23389	2.29688e-05	8.83478e-05		285.029	-0.259508	0.835373	0.304323	-0.852739	0.393804	0.500487		285.029	-0.314719	0.804007	0.271808	-1.15787	0.246916	0.422841
C24G6.2	hir-1	367.316	503.913	692.32	687.511	734.211	737.738	772.827	937.072	743.464	1358.62	1196.46	1250.51	731.543	774.621	778.518	1055.89	883.822	1019.66	837.393	630.872	653.041	1367.88	1427.18	1450.35		899.697	0.463947	1.37931	0.162666	2.85214	0.00434261	0.00955759		899.697	0.633347	1.55116	0.161037	3.93293	8.39182e-05	0.000273726		899.697	0.373096	1.29513	0.161782	2.30617	0.0211013	0.0751129
C24G6.3	mms-19	1000.91	1179.3	1091.89	692.253	699.212	630.068	860.717	887.163	864.163	874.752	878.116	847.785	732.563	758.834	757.812	556.617	568.237	550.511	811.191	856.53	782.265	822.152	798.095	846.236		806.141	-0.695258	0.617599	0.0749551	-9.27566	1.76524e-20	2.34493e-18		806.141	-0.0062861	0.995652	0.0764586	-0.0822158	0.934475	0.958997		806.141	-0.424493	0.745101	0.0802239	-5.29135	1.21419e-07	5.43184e-06
C24G6.4	nhr-47	927.262	946.586	860.303	954.613	918.542	940.317	2117.44	2134.89	2157.36	2168.39	1998.64	2085.49	2370.12	2373.33	2123.32	2127.6	2053.61	1971.7	1708.63	2132.83	1916.43	2172.24	2157.2	2318.16		1818.13	0.0417048	1.02933	0.0834434	0.499798	0.617217	0.690107		1818.13	-0.0358721	0.975442	0.0798047	-0.449499	0.653072	0.734597		1818.13	-0.158221	0.896129	0.0797499	-1.98396	0.0472598	0.132699
C24G6.6	hpo-15	132.196	154.848	185.923	181.756	182.775	196.198	692.008	602.985	731.293	911.742	809.97	891.11	220.381	174.711	200.841	430.068	440.523	392.014	624.497	839.545	621.889	1689.39	1583.28	1938.19		617.839	0.241611	1.18231	0.151707	1.59262	0.111246	0.163808		617.839	0.366676	1.28938	0.134407	2.7281	0.00637011	0.0145968		617.839	1.08327	2.11883	0.14658	7.39027	1.46532e-13	2.67127e-11
C24G6.7	grl-1	342.766	319.32	516.997	389.59	497.77	437.858	518.248	486.87	627.837	567.839	588.007	623.285	435.661	500.977	535.231	594.186	542.324	505.075	806.824	582.343	649.58	414.042	388.484	389.556		510.861	0.166942	1.12268	0.164491	1.0149	0.310155	0.391156		510.861	0.123699	1.08952	0.163455	0.756773	0.449186	0.555135		510.861	0.157753	1.11555	0.164291	0.960209	0.33695	0.516184
C24G6.8	C24G6.8	2300.21	1871.3	1403.39	1571.79	1588.2	1672.47	1855.79	1720.34	1787.15	2197.38	2307.25	2233.19	1162.1	1150.35	1178.13	958.014	1058.74	836.861	3505.7	4907.45	4413.22	3765.53	3800.34	4153.27		2224.92	-0.205644	0.867152	0.141748	-1.45077	0.146843	0.208188		2224.92	0.329166	1.25629	0.141856	2.32043	0.0203176	0.040802		2224.92	-0.290171	0.817805	0.144099	-2.0137	0.0440411	0.126835
C24H10.1	clc-7	857.387	594.897	437.898	1174.3	984.652	949.888	653.619	723.175	682.608	653.815	827.493	734.55	870.302	837.769	728.825	797.851	914.362	766.066	930.195	809.214	871.106	1089.08	1183.06	1066.78		839.121	0.719447	1.64655	0.168026	4.28175	1.85431e-05	7.30957e-05		839.121	0.105751	1.07605	0.169376	0.624357	0.532393	0.631826		839.121	0.0246113	1.01721	0.168681	0.145904	0.883997	0.937845
C24H10.2	C24H10.2	959.366	820.608	667.856	874.799	803.432	789.579	60.6138	67.2247	68.9708	135.962	139.214	140.805	181.61	145.241	147.007	185.869	179.541	200.762	978.233	879.581	908.027	500.647	537.54	483.05		452.314	0.0130393	1.00908	0.119421	0.109188	0.913053	0.935412		452.314	1.07991	2.11391	0.168849	6.3957	1.59811e-10	1.03808e-09		452.314	0.254783	1.19316	0.145041	1.75662	0.0789818	0.191572
C24H10.3	C24H10.3	457.965	355.189	203.863	781.55	607.435	646.019	23.2353	32.5938	26.3712	0.999717	4.86761	2.95396	411.174	334.687	358.201	370.748	484.02	322.276	500.034	425.838	490.358	112.705	132.625	101.884		299.483	1.00258	2.00358	0.220246	4.55211	5.31105e-06	2.40176e-05		299.483	-3.2121	0.10791	0.550433	-5.83558	5.36035e-09	3.01922e-08		299.483	0.0931528	1.0667	0.222722	0.418247	0.675766	0.804127
C24H10.5	cal-5	363.539	408.554	522.705	421.99	472.882	512.828	274.783	261.769	260.669	179.949	184.969	222.531	439.742	413.622	409.964	552.662	523.815	748.103	471.648	277.826	316.136	284.728	309.849	276.885		379.673	0.1194	1.08628	0.174425	0.684534	0.493638	0.575936		379.673	-0.440471	0.736894	0.184362	-2.38916	0.0168869	0.0347682		379.673	0.529397	1.44333	0.175171	3.02217	0.00250971	0.01585
C24H11.6	immp-1	710.082	473.293	243.82	572.136	470.548	504.852	415.205	469.555	478.738	384.891	404.011	355.459	152.022	138.927	127.337	111.719	179.541	76.0783	343.91	436.757	449.975	467.428	490.594	490.242		372.797	0.11807	1.08528	0.260952	0.452458	0.650939	0.717171		372.797	-0.252746	0.839298	0.26286	-0.96152	0.336291	0.442113		372.797	-0.183574	0.880519	0.27659	-0.663704	0.50688	0.674976
C24H11.8	twk-39	75.5407	104.982	231.589	124.858	150.109	143.56	149.514	159.913	162.284	117.967	112.929	113.235	20.4057	35.7841	25.8816	23.7279	34.2423	20.0762	248.925	140.733	164.991	160.159	181.919	169.007		119.681	0.0180407	1.01258	0.284135	0.0634933	0.949374	0.963097		119.681	-0.454979	0.729521	0.287803	-1.58087	0.113907	0.181101		119.681	-0.0635038	0.956937	0.353467	-0.17966	0.85742	0.920641
C24H11.9	mdt-21	296.497	314.071	287.04	228.38	197.553	208.959	279.834	270.936	327.611	201.943	233.645	194.961	69.3793	54.7286	45.5516	57.3424	72.1865	53.8888	293.688	395.508	342.673	348.792	356.795	312.844		226.867	-0.499467	0.707368	0.136111	-3.66957	0.000242963	0.000738619		226.867	-0.47797	0.717987	0.139869	-3.41727	0.00063252	0.00177709		226.867	0.117167	1.0846	0.194358	0.602841	0.546614	0.706722
C24H12.4	C24H12.4	2122.69	2249.24	1912.24	1607.35	1478.53	1569.59	3079.18	2940.57	2863.3	3548	3349.89	3417.73	375.464	359.946	340.601	332.191	359.082	260.991	2289.46	3063.37	2797.92	4599.54	4618.39	5024.68		2273.33	-0.432651	0.740899	0.108403	-3.99115	6.5754e-05	0.000228893		2273.33	0.215684	1.16125	0.107445	2.0074	0.0447073	0.0816548		2273.33	-0.173581	0.886639	0.123572	-1.4047	0.160112	0.314699
C24H12.5	dnsn-1	1318.18	1339.39	1091.08	592.682	610.546	602.951	986.995	881.051	987.905	1007.71	830.414	900.957	571.359	563.073	680.168	365.805	499.753	332.842	1129.99	2257.79	1606.07	536.238	565.708	536.988		866.486	-1.05324	0.481884	0.183149	-5.75074	8.88547e-09	8.49813e-08		866.486	-0.0603432	0.959036	0.183401	-0.329024	0.742138	0.807949		866.486	-0.597276	0.661001	0.187226	-3.19014	0.00142205	0.0103696
C25A1.1	C25A1.1	4488.06	3724.23	2663.27	2028.55	2018.3	1718.73	1285.01	1234.49	1267.84	919.74	987.151	955.112	1213.12	1131.41	1301.33	1026.23	1046.7	1206.69	528.42	628.445	527.279	358.283	360.316	257.706		1369.85	-0.91527	0.530245	0.151568	-6.03867	1.55394e-09	1.84366e-08		1369.85	-0.40414	0.755687	0.154255	-2.61995	0.00879436	0.0195324		1369.85	-0.153003	0.899376	0.154078	-0.993023	0.320699	0.500008
C25A1.10	dao-5	7294.4	8710.87	10323.6	4474.36	4650.26	4726.31	7577.74	7751.22	7788.63	7435.9	6963.6	7200.76	13441.2	13380.1	13160.3	10083.4	7104.82	12786.4	6369.43	9233.78	8493	6069.45	6691.09	6792.66		8270.97	-0.926728	0.52605	0.16373	-5.66011	1.51272e-08	1.33966e-07		8270.97	-0.097945	0.934363	0.163725	-0.59823	0.549687	0.646786		8270.97	-0.415687	0.749662	0.16353	-2.54196	0.0110234	0.046464
C25A1.11	aha-1	1591.08	1546.73	1298.2	1590.76	1642.64	1462.72	1086	1126.52	1011.23	897.746	877.143	799.537	1498.8	1531.35	1323.07	1397.97	1497.41	1561.72	1994.68	1850.15	2035.27	1719.04	1882.56	1652.92		1453.14	0.0828867	1.05914	0.0945882	0.876289	0.380873	0.464401		1453.14	-0.324516	0.798566	0.0981704	-3.30564	0.000947595	0.00257962		1453.14	0.0339005	1.02378	0.0956193	0.354536	0.722937	0.838399
C25A1.12	lid-1	2234.12	1814.44	1285.97	1261.23	1175.98	1107.01	722.315	677.34	699.85	650.816	691.2	706.98	576.46	590.438	717.437	519.048	667.262	532.548	248.925	350.619	366.903	310.828	336.843	310.446		773.125	-0.589406	0.664617	0.164273	-3.58797	0.000333261	0.00098261		773.125	-0.0351123	0.975956	0.167889	-0.209139	0.834339	0.882003		773.125	-0.131977	0.91258	0.168886	-0.78146	0.434532	0.611583
C25A1.13	mrpl-34	2464.51	1698.96	1137.56	1606.56	1445.09	1421.24	1544.64	1529.87	1573.14	1186.66	1217.88	1120.53	465.249	431.514	394.435	475.547	440.523	385.675	588.468	902.632	738.421	453.192	471.815	479.454		1007.23	-0.244543	0.844083	0.187801	-1.30214	0.192868	0.262773		1007.23	-0.398847	0.758464	0.188663	-2.11407	0.0345091	0.0651781		1007.23	0.0120327	1.00838	0.194447	0.0618815	0.950657	0.977349
C25A1.3	tag-72	1559.91	1235.29	916.569	823.433	849.32	707.431	688.977	674.284	726.222	424.88	478.973	494.295	851.937	795.67	901.714	632.744	836.623	699.498	266.394	414.92	383.056	274.051	281.681	208.562		671.935	-0.640389	0.64154	0.174192	-3.67633	0.000236611	0.000720486		671.935	-0.579559	0.669168	0.177873	-3.25827	0.00112093	0.00299666		671.935	-0.23284	0.850958	0.175945	-1.32337	0.185712	0.349294
C25A1.4	sup-46	4827.05	4931.52	3566.79	3270.82	3080.73	2939.79	3048.88	2947.7	2923.14	2766.22	2513.63	2729.46	4546.38	4679.3	4875.05	3656.07	4560.71	3799.69	1472.81	2235.96	2041.04	2057.16	2156.03	2090.42		3238.18	-0.520068	0.697339	0.135167	-3.84759	0.000119284	0.000389361		3238.18	-0.15534	0.897921	0.135828	-1.14365	0.252768	0.350723		3238.18	-0.230643	0.852255	0.135206	-1.70586	0.0880347	0.20668
C25A1.7	iars-2	3816.69	3124.09	2545.03	1518.06	1562.53	1327.13	831.42	893.274	815.478	539.847	588.981	609.5	524.426	565.178	497.961	476.535	444.225	488.169	716.206	862.596	796.11	1047.56	955.367	1009.25		1106.48	-1.10532	0.4648	0.121676	-9.0841	1.0456e-19	1.23464e-17		1106.48	-0.547127	0.684382	0.127482	-4.29181	1.77226e-05	6.3938e-05		1106.48	-0.172627	0.887226	0.130618	-1.32162	0.186296	0.350121
C25A1.9	rsa-1	4615.53	3955.19	2848.38	2009.59	1781.86	1638.18	1003.16	940.128	1079.19	1044.7	1120.52	1058.5	988.655	956.699	1006.28	698.984	1057.81	757.613	1198.77	1935.08	1584.14	1584.99	1652.53	1518.67		1584.8	-1.07235	0.475545	0.174194	-6.15603	7.4592e-10	9.82106e-09		1584.8	0.0930111	1.06659	0.176682	0.526433	0.598587	0.688729		1584.8	-0.230721	0.852209	0.177288	-1.30139	0.193126	0.35843
C25A11.2	C25A11.2	606.214	725.25	754.294	367.463	355.439	332.58	1178.94	1183.56	1215.1	1646.53	1679.32	1653.23	642.779	618.855	546.619	490.377	355.38	457.526	873.422	1252.04	1343	1823.44	1964.72	1839.9		996.083	-0.983313	0.505817	0.141242	-6.96192	3.35665e-12	8.91791e-11		996.083	0.476894	1.39174	0.136092	3.5042	0.000457974	0.00132267		996.083	-0.473605	0.720163	0.142454	-3.32462	0.000885392	0.00718962
C25A11.4	ajm-1	7799.57	11133.3	18457.8	14696.9	15838.4	14996.4	20088.4	22265.6	19570.5	15511.6	12717.1	15405.9	19594.5	22043	19605.8	22434.7	14536.3	27485.4	3444.56	2721.24	3161.36	3306.4	3110.22	3273.47		13883.3	0.284136	1.21768	0.2217	1.28163	0.199974	0.27072		13883.3	-0.505042	0.70464	0.221691	-2.27813	0.0227189	0.0450049		13883.3	0.0737476	1.05245	0.22166	0.332706	0.739356	0.848842
C25A8.4	cht-3	0	0.874849	1.63091	0	0.777766	0.797555	5.05115	2.03711	1.01428	3.99887	6.81465	9.84652	933.559	984.063	988.676	1072.7	1021.72	1125.32	15.2849	19.4114	24.2294	61.691	56.3361	68.3222		266.84	-0.734816	0.600895	1.32127	-0.556143	0.578113	0.656412		266.84	1.3511	2.55106	0.60854	2.22023	0.0264032	0.0514303		266.84	0.147486	1.10764	0.111354	1.32448	0.185345	0.348921
C25B8.1	kqt-1	429.638	520.535	707.813	488.37	503.215	478.533	2661.96	2789.83	2674.65	4491.73	4882.21	4648.54	647.88	667.268	509.349	689.098	659.859	667.798	116.82	111.616	104.994	187.446	152.577	173.802		1248.56	-0.175452	0.88549	0.139656	-1.25632	0.209	0.281098		1248.56	0.787059	1.72555	0.133015	5.91706	3.27754e-09	1.87673e-08		1248.56	0.144537	1.10538	0.139608	1.03531	0.300526	0.479083
C25B8.3	cpr-6	1048.13	1081.31	948.372	1515.69	1466.09	1669.28	1488.07	1668.4	1623.86	1571.56	1477.81	1582.34	1173.33	1454.52	1255.77	1186.39	1188.3	1092.57	971.682	889.287	932.257	1078.41	1091.51	1198.63		1277.23	0.596044	1.51157	0.0913936	6.52173	6.95031e-11	1.22889e-09		1277.23	-0.0455822	0.968899	0.0910542	-0.500605	0.616649	0.705446		1277.23	-0.163022	0.893152	0.0924959	-1.76248	0.0779884	0.18969
C25B8.6	nhr-120	125.586	134.727	163.091	274.214	272.218	261.598	148.504	196.581	170.398	342.903	340.733	353.49	293.842	284.168	306.438	413.261	384.069	372.995	169.226	162.571	169.606	1065.36	1009.36	1207.03		359.248	0.927785	1.90235	0.121902	7.61092	2.72161e-14	1.3062e-12		359.248	1.00886	2.01232	0.120867	8.34684	7.0116e-17	8.18416e-16		359.248	0.404239	1.32339	0.112831	3.5827	0.000340066	0.0034489
C25D7.15	C25D7.15	128.419	83.1106	86.438	118.536	124.443	125.216	85.8696	95.7443	96.3562	150.957	164.525	139.821	93.8661	103.142	84.8916	100.844	106.429	121.514	94.9847	42.4625	70.3808	91.3502	88.0252	113.87		104.633	0.310145	1.23983	0.192699	1.60948	0.107512	0.159129		104.633	0.712099	1.63819	0.196545	3.62307	0.000291124	0.000867881		104.633	0.220832	1.16541	0.201115	1.09804	0.272186	0.448742
C25D7.3	sdc-3	1016.97	1523.11	1987.26	888.233	908.431	773.628	6250.3	6389.41	5975.1	5729.38	4933.81	5905.94	2421.13	2561.72	2128.5	1700.5	1400.23	1805.8	974.957	1272.66	1451.46	1424.83	1508.16	1286.13		2592.4	-0.817259	0.567519	0.18108	-4.51325	6.38418e-06	2.83534e-05		2592.4	-0.167959	0.890101	0.178844	-0.939139	0.347659	0.45407		2592.4	-0.535613	0.689866	0.180198	-2.97236	0.00295517	0.0179609
C25D7.5	C25D7.5	74.5964	74.3622	102.747	109.844	99.554	115.645	162.647	158.895	129.827	274.922	336.838	238.286	97.9472	78.9355	83.8563	103.81	110.131	161.666	244.558	205.033	191.528	64.0638	66.8991	65.9249		139.688	0.36437	1.28732	0.192965	1.88827	0.0589901	0.0944497		139.688	0.913423	1.88351	0.179014	5.10252	3.35155e-07	1.4993e-06		139.688	0.521928	1.43587	0.19677	2.65247	0.00799043	0.0369007
C25D7.6	mcm-3	6824.15	7673.3	6868.56	3062.19	2943.84	2683.77	4417.74	3684.12	4396.89	5682.39	5539.34	5388.02	5625.84	5406.56	6134.97	3139.99	3612.1	3126.61	2381.17	4510.73	2992.91	1854.29	1982.33	1752.4		4236.84	-1.29792	0.406713	0.156069	-8.31632	9.07398e-17	7.58442e-15		4236.84	0.41024	1.32891	0.156127	2.62761	0.00859876	0.0191428		4236.84	-0.7972	0.575465	0.15626	-5.10174	3.36541e-07	1.34102e-05
C25D7.7	rap-2	2610.87	1980.66	1585.24	2056.21	1908.64	1881.43	1969.95	2005.54	2046.81	2128.4	2494.16	2252.88	1872.22	1585.03	1625.36	1661.94	2100.81	1941.05	2671.58	3797.36	3110.6	2946.93	2954.12	3058.92		2260.28	-0.078867	0.946801	0.149586	-0.527234	0.598031	0.673441		2260.28	0.191167	1.14169	0.149828	1.27591	0.201987	0.292012		2260.28	0.166391	1.12225	0.150283	1.10719	0.268213	0.444806
C25D7.8	otub-1	1202.04	969.333	559.401	551.59	549.881	511.233	1365.83	1218.19	1453.46	1202.66	1124.42	1238.69	1991.59	1893.4	2641.99	1495.85	1915.72	1107.36	2042.72	3261.12	2525.63	1351.27	1281.65	1426.38		1453.39	-0.759138	0.590849	0.222233	-3.41596	0.000635575	0.00174274		1453.39	-0.179257	0.883158	0.220904	-0.81147	0.417096	0.522368		1453.39	-0.530122	0.692496	0.220196	-2.4075	0.0160623	0.0614838
C25E10.12	C25E10.12	397.533	315.82	292.748	670.916	631.546	646.019	695.039	698.73	713.036	893.747	978.389	903.91	601.967	577.808	588.029	884.853	986.549	1036.57	686.728	478.007	490.358	582.506	613.829	607.708		665.514	0.95597	1.93988	0.125748	7.6023	2.90916e-14	1.37842e-12		665.514	0.398033	1.31771	0.122037	3.26157	0.00110795	0.00296509		665.514	0.717837	1.64471	0.122801	5.84552	5.04975e-09	3.54065e-07
C25E10.2	cyp-33B1	16.0524	12.2479	11.4163	10.2732	18.6664	23.9266	0	2.03711	2.02855	9.99717	7.78817	2.95396	3.06085	1.05247	3.10579	3.95465	10.1801	7.3965	2.18356	1.21321	2.30757	18.9819	10.563	27.5686		8.7065	0.417411	1.33553	0.455642	0.916093	0.359618	0.442914		8.7065	2.35187	5.10487	0.865859	2.71623	0.00660294	0.0150939		8.7065	1.57867	2.98695	0.723253	2.18274	0.029055	0.0932933
C25E10.7	C25E10.7	0	0	0	2.37073	0.777766	0	47.4808	45.835	50.7138	65.9813	71.0671	58.0945	1.02028	3.15742	2.07053	5.93197	8.32921	5.28321	9.826	6.06607	5.76891	11.8637	4.69468	13.185		17.4799	2.70468	6.51914	1.39745	1.93544	0.0529368	0.0858506		17.4799	0.438263	1.35497	0.264757	1.65534	0.097856	0.159581		17.4799	1.6647	3.17047	0.704289	2.36365	0.0180957	0.067183
C25F6.1	C25F6.1	1680.78	1288.65	769.788	1109.5	874.987	957.066	326.305	257.695	301.24	261.926	283.295	244.194	137.738	133.664	172.889	147.311	209.156	197.592	394.132	514.403	568.815	675.042	652.56	664.044		534.282	-0.345582	0.78699	0.20552	-1.6815	0.0926657	0.139996		534.282	-0.165282	0.891754	0.214886	-0.769163	0.441796	0.547698		534.282	0.318757	1.24726	0.223074	1.42893	0.153026	0.305623
C25F6.2	dlg-1	6424.73	9021.44	12977.9	10915.6	11172.6	10746.3	23879.8	26180	22830.3	19735.4	17772.6	19399.6	16713.3	18025.7	16578.7	18140	15299.8	21702.4	18242.5	15989	17747.5	23057	24664.7	22902.3		17505	0.207988	1.15508	0.168635	1.23336	0.21744	0.290089		17505	-0.357103	0.780731	0.168488	-2.11945	0.0340525	0.064444		17505	0.103673	1.07451	0.168531	0.615159	0.53845	0.701264
C25F6.3	dpyd-1	2367.26	2938.62	2814.13	2163.68	2161.41	2080.82	1928.53	2125.73	2004.21	1272.64	1185.75	1299.74	3378.16	3365.81	3062.31	2901.72	2616.3	2864.56	2597.34	2261.43	2208.34	1309.75	1395.49	1362.85		2236.11	-0.342405	0.788725	0.0892047	-3.83842	0.00012383	0.000402785		2236.11	-0.688974	0.620295	0.0914922	-7.53041	5.0583e-14	4.57418e-13		2236.11	-0.226483	0.854716	0.0891181	-2.54138	0.0110415	0.0464866
C25F6.4	ddr-1	702.528	837.23	1132.66	1000.45	1140.98	1073.51	2952.9	3504.85	2814.62	1397.6	1339.57	1389.34	1414.11	1492.41	1355.16	1629.32	1501.11	1482.47	2106.04	1770.08	1798.75	1000.11	934.24	1053.6		1534.32	0.265409	1.20198	0.134535	1.97279	0.0485192	0.0795536		1534.32	-1.16802	0.445032	0.132782	-8.79655	1.41082e-18	1.86804e-17		1534.32	0.114297	1.08245	0.133636	0.855286	0.392393	0.570326
C25F6.7	C25F6.7	886.659	798.737	776.311	1497.51	1434.2	1525.72	3886.36	4246.36	3670.66	2132.4	2312.11	2047.09	1482.47	1437.68	1462.83	2050.49	1765.79	2085.81	3590.86	2841.35	2953.68	1832.94	1839.14	1970.56		2105.32	0.857212	1.81153	0.100077	8.56553	1.07582e-17	1.02603e-15		2105.32	-0.862515	0.549993	0.096952	-8.89631	5.77332e-19	7.90653e-18		2105.32	0.428918	1.34622	0.0987213	4.34474	1.39441e-05	0.000293028
C25F6.8	C25F6.8	16.9966	21.8712	19.5709	34.7707	25.6663	27.9144	8.08185	10.1856	8.11421	8.99745	6.81465	8.86187	23.4665	15.7871	8.2821	33.6145	21.2858	26.4161	26.2027	12.1321	14.9992	4.74546	8.21568	7.19181		16.6744	0.593528	1.50893	0.327865	1.81029	0.0702515	0.110044		16.6744	-0.0973994	0.934716	0.470138	-0.207172	0.835875	0.883202		16.6744	0.769652	1.70486	0.358335	2.14785	0.0317254	0.0997592
C25G4.2	C25G4.2	1078.34	872.224	465.624	1142.69	923.986	984.98	355.601	360.569	371.225	542.846	605.53	556.328	218.341	170.501	164.607	226.404	325.765	273.67	82.9751	118.895	121.147	225.41	254.686	239.727		445.086	0.337747	1.26378	0.210759	1.60253	0.109039	0.161036		445.086	0.648684	1.56774	0.215105	3.01566	0.00256416	0.0063722		445.086	0.577731	1.4925	0.222517	2.59634	0.00942215	0.0411661
C25G4.3	C25G4.3	658.148	460.171	296.825	516.029	417.66	447.428	247.507	208.804	264.726	277.921	376.753	297.365	397.911	317.847	287.803	283.746	308.181	327.559	89.5258	148.012	119.993	107.959	96.2409	80.3085		293.101	-0.0336828	0.976923	0.218879	-0.153888	0.877698	0.906581		293.101	0.401078	1.32049	0.224745	1.78459	0.0743276	0.126412		293.101	-0.126564	0.916011	0.223197	-0.56705	0.57068	0.72508
C25G4.4	spe-44	143.527	111.981	70.9444	54.5268	43.5549	59.8166	731.407	516.408	796.207	490.861	388.435	513.004	103.049	77.8831	123.196	94.9116	93.4723	92.9846	102.627	146.799	114.224	62.8774	82.1568	68.3222		211.799	-1.04355	0.485131	0.240763	-4.33436	1.46188e-05	5.93286e-05		211.799	-0.554057	0.681102	0.210859	-2.62762	0.00859848	0.0191428		211.799	-0.112668	0.924876	0.237406	-0.47458	0.635086	0.772228
C25G4.5	dpy-26	3775.14	4377.74	4419.76	3310.33	3024.73	2890.34	6003.8	5942.26	5858.46	5263.51	4810.17	5193.05	4766.76	4987.67	4851.24	3599.72	3424.23	3479.52	3254.59	4957.2	4504.37	4225.84	4281.54	3799.67		4375.07	-0.446722	0.733708	0.115797	-3.85779	0.000114415	0.000374948		4375.07	-0.221863	0.857457	0.115493	-1.921	0.0547312	0.0976129		4375.07	-0.475669	0.719133	0.115886	-4.10462	4.04975e-05	0.000663613
C25G6.2	tsp-9	1110.45	977.206	751.848	934.067	866.431	806.328	900.116	897.348	890.534	823.767	1033.88	841.877	780.517	770.411	681.203	978.776	1133.7	999.584	1649.68	2094.01	2151.8	1405.84	1471.78	1308.91		1094.17	-0.122395	0.918661	0.135751	-0.901617	0.36726	0.450833		1094.17	0.00628876	1.00437	0.136749	0.0459875	0.96332	0.978717		1094.17	0.479733	1.39449	0.137051	3.50041	0.000464551	0.00435033
C25G6.3	C25G6.3	30.2163	49.8664	85.6226	60.0585	75.4433	83.7432	45.4604	51.9464	63.8994	34.9901	44.782	56.1252	25.5071	19.997	32.0932	31.6372	24.0622	43.3224	80.7915	65.5136	62.3043	59.3183	69.2465	51.5413		51.9787	0.394625	1.3146	0.282489	1.39696	0.162426	0.227206		51.9787	-0.246689	0.842829	0.299245	-0.82437	0.409729	0.51544		51.9787	0.343374	1.26872	0.331714	1.03515	0.300598	0.479083
C25G6.5	npr-11	87.816	77.8615	79.099	69.5414	58.3325	72.5775	5.05115	4.07423	4.0571	10.9969	9.73522	6.89256	25.5071	12.6297	11.3879	26.6939	27.764	31.6993	9.826	4.85286	4.61513	13.05	11.7367	5.99317		27.9913	-0.287464	0.819341	0.221037	-1.30052	0.193421	0.263383		27.9913	1.06604	2.09368	0.517338	2.06063	0.0393381	0.0730619		27.9913	0.792138	1.73164	0.317076	2.49826	0.0124806	0.0507554
C25H3.11	C25H3.11	609.991	1195.92	2295.5	942.76	1118.43	914.795	1808.31	1771.27	1927.12	1947.45	1650.12	1961.43	1220.26	1296.65	1373.79	947.139	633.02	789.312	1882.22	2363.34	1919.89	2456.96	2349.69	2665.76		1585.05	-0.463274	0.725338	0.266894	-1.7358	0.0826	0.12706		1585.05	0.013623	1.00949	0.266436	0.0511305	0.959222	0.975682		1585.05	-0.715606	0.608949	0.267693	-2.67323	0.00751248	0.0353882
C25H3.4	eif-2D	807.341	809.235	623.006	369.043	395.105	327.795	283.875	317.79	270.812	250.929	266.745	243.209	216.3	227.334	302.297	169.061	192.497	119.401	993.518	1447.37	1143.4	696.397	651.386	683.222		491.961	-1.03568	0.487785	0.163803	-6.32272	2.57004e-10	3.88588e-09		491.961	-0.197338	0.872158	0.172131	-1.14644	0.251614	0.349312		491.961	-0.629327	0.646478	0.177972	-3.5361	0.000406084	0.00394963
C25H3.7	C25H3.7	1766.71	1378.76	821.977	1342.62	1199.32	1239.4	335.397	332.049	350.939	480.864	517.913	452.94	197.935	212.6	233.969	276.825	267.46	320.163	602.661	584.77	491.511	1128.23	1050.43	1111.13		695.691	-0.0685813	0.953575	0.176608	-0.388324	0.697776	0.75645		695.691	0.51151	1.42554	0.1838	2.78298	0.00538622	0.0125701		695.691	0.422877	1.3406	0.189805	2.22795	0.0258836	0.086125
C25H3.9	C25H3.9	6971.46	5141.49	3116.66	5162.66	4696.93	4529.31	2375.05	2328.42	2369.35	2673.24	2974.11	2650.68	2880.26	2860.62	2741.38	2918.53	3077.18	2861.39	1637.67	1679.09	1623.37	1931.4	2072.7	2361.31		3068.09	-0.0817078	0.944938	0.173116	-0.471984	0.636938	0.706243		3068.09	0.230494	1.17324	0.174014	1.32457	0.185313	0.27179		3068.09	0.062421	1.04422	0.173844	0.359063	0.719548	0.836033
C26B2.3	nhr-31	1660.95	1720.83	2010.09	2588.84	2661.52	2671.01	4059.11	3969.32	3362.32	3966.88	3842.49	4035.1	4192.34	4556.16	4539.63	5673.93	5230.75	6327.18	1690.07	1418.25	1486.07	1853.1	1995.24	2137.17		3235.35	0.55452	1.46868	0.100883	5.49666	3.87059e-08	3.05106e-07		3235.35	0.0563435	1.03983	0.09995	0.563716	0.572947	0.666915		3235.35	0.374812	1.29667	0.0995655	3.76447	0.000166901	0.00199515
C26B2.4	nhr-258	20.7737	21.8712	17.94	40.3024	33.4439	35.0924	24.2455	22.4082	14.1999	20.9941	34.0733	25.6009	42.8519	41.0465	46.5868	70.195	54.6026	68.6818	66.5984	29.1172	49.6127	100.841	111.499	77.9113		44.6037	0.848009	1.80002	0.284312	2.98267	0.00285745	0.00666768		44.6037	0.408349	1.32717	0.309328	1.32011	0.186797	0.27328		44.6037	0.565533	1.47993	0.250539	2.25727	0.0239913	0.0814075
C26B2.6	elpc-4	730.856	558.154	383.263	474.146	444.882	452.213	143.453	137.505	165.327	148.958	147.002	134.897	361.18	314.69	269.168	270.893	314.659	212.385	325.35	420.986	341.52	328.623	394.353	326.029		325.02	-0.284937	0.820778	0.185596	-1.53526	0.124721	0.180646		325.02	-0.0508084	0.965395	0.20408	-0.248963	0.803389	0.856806		325.02	-0.24253	0.845262	0.192394	-1.26059	0.207457	0.375673
C26B2.7	C26B2.7	740.299	512.661	263.391	467.034	365.55	411.538	130.32	102.874	140.984	82.9765	83.7229	94.5266	175.489	152.609	137.69	147.311	230.442	129.967	183.419	200.18	161.53	112.705	131.451	110.274		219.539	-0.284262	0.821162	0.253525	-1.12124	0.262188	0.34003		219.539	-0.518468	0.698113	0.274312	-1.89007	0.058749	0.103658		219.539	0.126402	1.09157	0.265387	0.476292	0.633866	0.771645
C26B2.8	C26B2.8	135.973	148.724	181.031	168.322	148.553	189.02	149.514	134.449	122.727	103.971	95.4051	90.588	166.306	159.976	155.289	147.311	159.18	155.326	270.761	146.799	193.836	37.9637	45.7731	34.7604		139.232	0.116552	1.08414	0.176572	0.660082	0.509201	0.590943		139.232	-0.488357	0.712836	0.190493	-2.56365	0.0103577	0.0226077		139.232	-0.0602936	0.959069	0.181534	-0.332135	0.739787	0.848842
C26B9.3	C26B9.3	3287.91	2188	1987.26	5021.99	4491.6	4616.25	3211.52	3265.49	3017.47	962.727	1205.22	1030.93	4185.2	4129.91	3679.32	4077.24	3858.28	4527.71	3471.85	2595.07	3243.28	1402.28	1414.27	1350.86		3009.24	0.921291	1.89381	0.149734	6.15284	7.61082e-10	9.98534e-09		3009.24	-1.56945	0.336938	0.151404	-10.366	3.54163e-25	7.30173e-24		3009.24	0.0552363	1.03903	0.149681	0.369027	0.712108	0.829768
C26B9.5	C26B9.5	617.545	625.517	726.569	964.887	1069.43	1129.34	512.187	499.093	537.566	853.758	944.316	912.772	481.574	509.397	505.208	974.821	982.847	989.018	1067.76	621.166	703.808	787.747	880.252	827.058		780.151	0.683123	1.60561	0.139973	4.88039	1.05875e-06	5.70816e-06		780.151	0.807593	1.75029	0.14236	5.67289	1.40406e-08	7.51771e-08		780.151	0.977851	1.96953	0.142432	6.8654	6.6306e-12	7.92629e-10
C26C6.1	pbrm-1	10010.1	13322.2	17242.8	8732.97	8655.76	7805.67	21180.5	20673.6	21606.1	20072.3	17289.7	19553.2	16311.3	16738.5	16355.1	11315.2	10638.3	13305.2	8271.31	13497	13659.6	7858.49	7915.22	7728.8		13739.1	-0.687545	0.620909	0.170417	-4.03449	5.47199e-05	0.000193562		13739.1	-0.15704	0.896863	0.170297	-0.922154	0.356448	0.46284		13739.1	-0.486702	0.713655	0.170393	-2.85635	0.00428545	0.0235667
C26C6.2	goa-1	6623.03	7828.15	8586.72	7677.21	7496.11	7268.12	12469.3	13097.6	12408.7	8858.49	8264.22	8418.77	7208.3	7404.15	7229.24	7384.32	7375.05	7431.37	14113.4	14220.1	14219.2	8603.53	7922.27	8090.78		9174.92	-0.0380929	0.973942	0.0754581	-0.504822	0.613684	0.686958		9174.92	-0.572239	0.672572	0.0753486	-7.59455	3.08861e-14	2.84384e-13		9174.92	0.0228722	1.01598	0.0757171	0.302075	0.762595	0.863384
C26C6.3	nas-36	31.1605	27.9952	53.8199	55.317	52.8881	45.4606	62.6343	79.4474	55.7852	21.9938	14.6028	28.5549	69.3793	54.7286	59.01	68.2177	74.9629	61.2853	20.7438	14.5586	26.537	37.9637	43.4258	46.7468		46.1341	0.434007	1.35098	0.246536	1.76042	0.0783366	0.121178		46.1341	-1.60369	0.329035	0.276148	-5.80736	6.3466e-09	3.54317e-08		46.1341	0.160733	1.11785	0.236401	0.679917	0.496557	0.665361
C26C6.5	dcp-66	5071.61	6343.53	7436.12	5774.3	5523.69	4999.07	12878.4	12259.3	12897.5	11547.7	9584.32	10852.8	9030.53	9863.78	9384.66	7227.12	6972.48	7839.23	6260.25	8044.83	8266.85	6317.4	5733.37	6608.07		8196.55	-0.210201	0.864417	0.12729	-1.65136	0.0986647	0.147709		8196.55	-0.249959	0.84092	0.126983	-1.96844	0.0490169	0.0885245		8196.55	-0.359719	0.779316	0.12718	-2.82843	0.00467776	0.0251736
C26C6.9	C26C6.9	443.801	320.195	267.469	821.853	661.101	689.087	119.207	139.542	137.942	55.9842	83.7229	72.8642	397.911	325.214	358.201	530.912	471.063	548.398	496.759	371.244	409.593	351.164	307.501	330.823		362.981	1.07665	2.10913	0.164187	6.55743	5.47421e-11	1.013e-09		362.981	-0.898864	0.536309	0.198485	-4.52863	5.93684e-06	2.28644e-05		362.981	0.519137	1.4331	0.166586	3.11632	0.00183121	0.0124796
C26D10.2	hel-1	23316.6	21645.5	16005.7	13061.9	12320.6	12249.6	33798.3	33866	33948.8	26176.6	24425.7	24348.5	16335.8	16309.1	16212.2	12026.1	13947.7	11028.2	21018.9	40072.5	33100.9	25236.4	22491	24230.4		21965.5	-0.696054	0.617258	0.16585	-4.19689	2.70601e-05	0.000102862		21965.5	-0.439073	0.737608	0.165773	-2.64864	0.00808165	0.0180925		21965.5	-0.400935	0.757367	0.165929	-2.4163	0.0156789	0.0602408
C26D10.3	C26D10.3	101.98	85.7352	66.0517	82.9755	59.1102	65.3995	179.821	172.136	154.17	239.932	275.507	258.963	537.689	559.916	562.148	414.25	411.833	672.025	40.3958	54.5947	64.6118	199.31	206.566	194.179		235.804	-0.28578	0.820298	0.209106	-1.36668	0.171727	0.238113		235.804	0.613702	1.53018	0.18819	3.26107	0.00110993	0.00296934		235.804	-0.149276	0.901703	0.176835	-0.844156	0.398583	0.577481
C26D10.4	C26D10.4	110.478	124.229	138.627	177.805	171.886	177.057	637.456	701.785	573.066	635.82	608.451	622.3	197.935	192.603	197.735	272.871	198.05	268.387	111.361	115.255	119.993	367.774	372.053	409.933		312.621	0.492735	1.40711	0.135872	3.62645	0.000287339	0.000859822		312.621	-0.034937	0.976074	0.112581	-0.310327	0.756312	0.818565		312.621	0.326456	1.25393	0.130105	2.50918	0.0121012	0.0496795
C26D10.6	C26D10.6	264.392	343.816	451.761	437.795	496.215	526.386	313.172	342.235	329.64	221.937	227.804	217.608	1399.83	1502.93	1830.34	1304.05	1204.96	1540.59	1095.05	760.686	794.956	702.329	632.608	733.564		736.444	0.460163	1.3757	0.170655	2.69645	0.0070083	0.0146077		736.444	-0.561697	0.677505	0.177473	-3.16498	0.00155095	0.00403812		736.444	-0.225294	0.85542	0.165054	-1.36497	0.172261	0.331695
C26E1.3	ceh-79	30.2163	33.2443	47.2963	41.0926	41.2216	44.6631	68.6957	76.3917	39.5568	111.968	124.611	128.989	51.0142	59.991	59.01	71.1837	53.6771	49.6622	140.839	156.505	138.454	288.287	257.033	272.09		99.4039	0.186982	1.13838	0.22278	0.839312	0.401294	0.485009		99.4039	0.985789	1.9804	0.193387	5.0975	3.44167e-07	1.5369e-06		99.4039	0.0395834	1.02782	0.211708	0.186972	0.851683	0.917707
C26E6.11	mmab-1	1536.31	1083.06	551.246	867.687	706.212	709.026	375.806	343.254	404.696	415.882	445.873	375.152	505.04	470.456	585.959	486.422	691.325	623.419	219.447	222.018	267.678	319.133	309.849	309.248		534.342	-0.473155	0.720387	0.227634	-2.07858	0.0376557	0.0635051		534.342	0.13842	1.1007	0.232506	0.595341	0.551616	0.648342		534.342	0.206158	1.15361	0.230318	0.895103	0.370732	0.549579
C26E6.12	C26E6.12	1107.62	865.226	487.641	566.604	566.214	494.484	261.65	250.565	262.697	224.936	230.725	246.163	194.874	198.918	270.204	177.959	249.876	203.932	175.776	218.379	212.296	205.241	146.709	203.768		334.269	-0.595538	0.661798	0.21132	-2.81819	0.00482957	0.010505		334.269	-0.142909	0.905691	0.220347	-0.648562	0.516621	0.617552		334.269	-0.0708773	0.952059	0.222285	-0.318857	0.749835	0.855589
C26E6.2	flh-2	2251.11	2656.04	2763.57	2950.77	2849.73	2661.44	3091.31	3404.02	2867.36	2362.33	2282.91	2438	3506.71	3889.94	3061.27	2843.39	2615.37	2756.78	2274.17	1884.12	2142.57	1344.15	1417.79	1471.92		2574.45	0.141322	1.10292	0.103795	1.36155	0.173341	0.239994		2574.45	-0.402514	0.756539	0.104195	-3.86309	0.000111961	0.000358568		2574.45	-0.348209	0.785559	0.103915	-3.35089	0.000805513	0.00662957
C26E6.3	ntl-9	1602.41	1730.45	1794.81	1264.39	1285.65	1239.4	1391.09	1398.48	1333.77	1402.6	1542.06	1361.77	2489.49	2609.08	2646.13	2243.27	2148.01	2796.93	1442.24	1967.83	1701.83	1225.52	1134.94	1084.76		1701.54	-0.436539	0.738905	0.110733	-3.94227	8.07155e-05	0.000275306		1701.54	0.0627257	1.04444	0.111628	0.561915	0.574174	0.667529		1701.54	-0.107975	0.92789	0.109716	-0.984128	0.325052	0.504423
C26E6.4	rpb-2	2531.56	3249.19	3736.41	1876.04	1747.64	1630.2	3576.22	3162.62	3459.7	3601.98	3320.68	3625.49	3987.27	4104.65	4294.27	2858.22	2834.71	2931.13	2659.57	3555.93	3267.51	2606.45	2683.01	2575.87		3078.18	-0.857492	0.551911	0.120746	-7.1016	1.23321e-12	3.77782e-11		3078.18	0.0486089	1.03427	0.12032	0.403997	0.686215	0.761936		3078.18	-0.522324	0.696249	0.120368	-4.3394	1.4287e-05	0.00029766
C26E6.5	fsn-1	2442.8	2307.85	1490.65	1242.26	1302.76	1242.59	992.047	1007.35	1025.43	1107.69	1133.18	1095.92	735.624	697.79	806.47	618.903	725.567	610.74	616.854	919.617	812.263	709.447	796.921	727.571		1048.68	-0.720138	0.60704	0.151236	-4.76169	1.91977e-06	9.78832e-06		1048.68	0.141611	1.10314	0.153163	0.924578	0.355185	0.461832		1048.68	-0.195652	0.873178	0.155442	-1.25868	0.208146	0.376532
C26E6.6	mrps-18C	1243.59	1154.8	789.359	930.906	928.653	936.329	880.921	902.441	900.677	1046.7	1164.33	1152.04	1271.27	1307.17	1299.25	1182.44	1305.84	1167.59	752.235	735.208	822.647	605.047	634.955	608.906		988.472	-0.18804	0.877797	0.119547	-1.57294	0.115732	0.169374		988.472	0.325441	1.25305	0.12053	2.70008	0.00693229	0.0157849		988.472	-0.0846889	0.942988	0.119375	-0.709437	0.478053	0.648924
C26E6.8	ula-1	1757.26	1830.18	1156.31	1012.3	998.652	913.998	1634.55	1494.22	1748.61	2004.43	2057.05	1923.03	691.752	709.367	758.848	485.433	608.958	512.472	1232.62	2130.41	1849.51	1955.13	1793.37	1800.35		1377.45	-0.697247	0.616748	0.168717	-4.13264	3.58622e-05	0.000132991		1377.45	0.295122	1.22699	0.168211	1.75448	0.0793485	0.133752		1377.45	-0.426271	0.744183	0.172625	-2.46935	0.0135358	0.0542029
C26E6.9	set-2	1814.86	2736.53	4478.47	1558.36	1655.86	1364.62	3247.89	2921.22	3303.5	2460.3	2029.79	2453.75	4853.49	5087.66	4549.98	3451.42	2747.71	3804.97	929.103	1309.06	1262.24	883.843	849.736	843.839		2524.93	-0.979983	0.506986	0.21254	-4.61083	4.01073e-06	1.87058e-05		2524.93	-0.448043	0.733036	0.21244	-2.10904	0.0349413	0.0658961		2524.93	-0.534667	0.690318	0.212054	-2.52137	0.01169	0.0483513
C26F1.4	rps-30	13215.8	10991.6	7719.9	11831.5	15716.3	13788.9	7902.03	8172.9	8560.49	6754.09	7280.97	6709.42	10550.8	10642.6	9950.95	11488.3	12135.7	12706.1	9877.31	8196.48	9311.03	9403.14	9493.81	10774.5		10132.3	0.372738	1.29481	0.143494	2.59759	0.00938815	0.0189241		10132.3	-0.248002	0.842062	0.143799	-1.72464	0.0845922	0.141086		10132.3	0.222187	1.1665	0.143595	1.54731	0.121787	0.258712
C26F1.6	frpr-3	17.9409	14.8724	18.7554	18.1756	14.7776	13.5584	14.1432	13.2412	10.1428	14.9958	18.4969	14.7698	1380.44	1375.58	1297.18	1707.42	1575.15	1568.06	60.0478	44.889	32.3059	41.5228	29.3417	33.5618		388.724	-0.15011	0.901182	0.287086	-0.522874	0.601062	0.676343		388.724	0.363998	1.28699	0.332525	1.09465	0.273671	0.374048		388.724	0.259118	1.19675	0.11311	2.29084	0.0219725	0.0769313
C26F1.7	hint-3	571.276	394.557	260.945	397.492	338.328	370.863	500.064	411.497	513.224	651.815	656.154	696.149	442.803	382.048	553.866	400.408	524.74	399.411	418.151	430.691	426.9	536.238	511.72	532.194		471.731	-0.146567	0.903398	0.1946	-0.753169	0.451348	0.534051		471.731	0.492199	1.40659	0.193391	2.54509	0.0109248	0.0236887		471.731	-0.0571708	0.961147	0.19497	-0.293229	0.769347	0.868567
C26G2.1	syg-2	1387.12	1822.31	2895.67	2235.6	2305.3	2119.9	3940.91	4393.03	3720.36	1991.44	1993.77	2106.17	2950.66	3301.61	2799.35	2853.28	2408.07	2781.08	2798.23	2206.84	2635.24	1888.7	1756.98	1787.16		2544.95	0.125177	1.09064	0.173928	0.719704	0.471707	0.554787		2544.95	-0.984705	0.505329	0.173832	-5.6647	1.47281e-08	7.86919e-08		2544.95	-0.170604	0.888471	0.173781	-0.981717	0.326239	0.505887
C26H9A.1	vha-7	589.217	692.88	568.371	482.048	479.882	449.023	473.798	563.262	523.366	248.93	244.354	263.887	703.996	759.886	678.097	604.073	604.331	572.7	1412.76	1299.35	1263.39	866.047	782.837	903.771		667.928	-0.390944	0.76263	0.0981972	-3.98121	6.85641e-05	0.000237785		667.928	-1.04319	0.485253	0.107498	-9.70433	2.88982e-22	4.98297e-21		667.928	-0.265641	0.831829	0.0982612	-2.70341	0.00686317	0.0332569
C26H9A.2	wdfy-3	761.072	1474.12	2932.37	1506.99	1587.42	1317.56	2835.72	3033.26	2691.89	2611.26	2515.58	2751.12	4435.17	4556.16	4552.05	3769.77	3052.19	3540.81	1124.53	1170.75	1329.16	1733.28	1693.6	1859.08		2451.46	-0.228512	0.853515	0.259206	-0.881584	0.378002	0.461809		2451.46	-0.119936	0.920228	0.258784	-0.463461	0.643034	0.726283		2451.46	-0.386203	0.765141	0.258496	-1.49404	0.135165	0.27819
C27A2.1	smc-5	2248.28	2602.68	2015.8	1449.31	1330.76	1182.77	1729.52	1569.6	1646.17	1978.44	1847.74	2000.81	1742.64	1692.38	1929.73	1265.49	1419.67	1341.94	350.461	621.166	542.278	500.647	512.893	462.673		1415.99	-0.792989	0.577147	0.142845	-5.55141	2.83373e-08	2.29631e-07		1415.99	0.236678	1.17828	0.14319	1.6529	0.0983521	0.160266		1415.99	-0.413695	0.750698	0.143659	-2.8797	0.00398055	0.0224319
C27A2.4	pho-12	31.1605	19.2467	17.1245	20.5463	20.9997	18.3438	47.4808	46.8536	38.5425	36.9895	32.1262	30.5242	26.5274	34.7316	40.3753	31.6372	31.4659	33.8126	0	2.42643	1.15378	8.30456	4.69468	2.39727		24.061	-0.159013	0.895637	0.296973	-0.535447	0.592341	0.668206		24.061	-0.415862	0.749572	0.264623	-1.57152	0.116061	0.183909		24.061	-0.0689165	0.953354	0.275707	-0.249962	0.802616	0.889388
C27A2.6	dsh-2	3553.24	3604.38	2722.8	1794.64	1678.42	1590.32	3911.61	3431.52	3865.41	3468.02	3308.03	3301.54	4295.39	4275.15	3988.87	3057.93	3493.64	3212.19	2301.47	4429.45	3487.89	1879.2	1929.51	1911.82		3103.85	-0.964337	0.512514	0.158886	-6.06935	1.2843e-09	1.55855e-08		3103.85	-0.153457	0.899093	0.158517	-0.96808	0.333005	0.438557		3103.85	-0.363214	0.777431	0.158488	-2.29174	0.0219208	0.0769313
C27A7.4	che-11	195.461	239.709	337.598	377.736	401.327	391.599	477.839	538.816	449.324	307.913	277.454	310.165	317.308	415.727	355.095	377.669	265.609	377.221	290.413	178.343	231.91	404.551	382.616	361.988		344.308	0.596608	1.51216	0.183465	3.25189	0.00114641	0.00294379		344.308	-0.711108	0.610851	0.183383	-3.87771	0.000105443	0.000339414		344.308	-0.0935702	0.937201	0.18412	-0.508201	0.611313	0.75439
C27A7.5	C27A7.5	363.539	395.432	313.949	195.98	201.441	185.83	447.532	433.905	418.896	405.885	427.376	443.093	424.438	422.042	526.949	389.533	389.622	361.372	704.197	892.926	676.117	600.301	619.697	643.667		453.488	-0.878128	0.544073	0.126404	-6.94698	3.73178e-12	9.80354e-11		453.488	-0.0267866	0.981604	0.121212	-0.220989	0.825101	0.874084		453.488	-0.267535	0.830738	0.121804	-2.19644	0.0280604	0.0911024
C27A7.6	C27A7.6	228.511	219.587	169.614	101.941	119.776	102.087	280.844	229.175	318.483	249.929	222.936	247.148	44.8925	49.4663	55.9042	26.6939	33.3168	35.9259	206.346	419.772	242.294	129.314	127.93	142.638		166.855	-0.930202	0.524785	0.211707	-4.39382	1.11374e-05	4.65978e-05		166.855	-0.20262	0.868971	0.205403	-0.986455	0.32391	0.428734		166.855	-0.648464	0.637959	0.269471	-2.40643	0.0161092	0.0615985
C27B7.6	C27B7.6	0	2.62455	2.44636	5.5317	6.22213	9.57066	23.2353	16.2969	29.414	32.9907	30.1792	28.5549	13.2637	15.7871	11.3879	29.6599	30.5404	20.0762	10.9178	1.21321	6.9227	16.6091	10.563	11.9863		15.2497	2.02385	4.06668	0.694127	2.91568	0.00354913	0.00802737		15.2497	0.411237	1.32983	0.331495	1.24055	0.214771	0.306521		15.2497	0.996089	1.99459	0.368491	2.70316	0.00686843	0.0332569
C27B7.7	C27B7.7	151.081	240.583	351.46	383.268	413.772	390.004	441.471	469.555	388.468	438.876	437.111	447.032	221.402	217.862	221.546	242.222	166.584	253.594	424.702	313.009	362.288	411.669	353.274	328.426		336.219	0.672441	1.59377	0.203483	3.30465	0.000950946	0.00249789		336.219	0.0258941	1.01811	0.201855	0.128281	0.897927	0.929917		336.219	0.00167677	1.00116	0.209635	0.00799854	0.993618	1
C27B7.8	rap-1	4163.23	4326.13	4349.63	3915.65	3660.17	3374.45	3698.45	3923.48	3489.11	2864.19	2627.53	2903.74	1771.21	1660.8	1883.14	1384.13	1660.29	1582.85	3071.17	4181.95	3363.28	2408.32	2197.11	2085.62		2939.4	-0.229594	0.852875	0.107406	-2.13763	0.032547	0.056254		2939.4	-0.40433	0.755587	0.108066	-3.7415	0.000182923	0.000566232		2939.4	-0.199876	0.870625	0.109976	-1.81744	0.0691492	0.174537
C27C12.4	C27C12.4	969.753	823.233	643.393	723.862	774.655	677.921	793.031	799.567	714.05	713.798	665.889	739.474	937.64	1033.53	812.681	851.238	874.567	782.972	1121.26	1272.66	1315.31	1004.85	1078.6	1051.2		882.298	-0.161357	0.894183	0.126129	-1.27931	0.200789	0.271675		882.298	-0.122349	0.918691	0.127622	-0.958682	0.337719	0.443223		882.298	-0.149657	0.901465	0.126489	-1.18317	0.236743	0.410348
C27C12.6	dmd-4	314.438	206.464	185.108	347.707	318.106	303.071	575.832	515.39	520.324	304.914	329.05	373.183	159.164	172.606	129.408	150.277	158.255	153.213	303.514	274.187	316.136	234.901	227.692	197.775		282.113	0.460667	1.37618	0.156731	2.93922	0.0032904	0.0075222		282.113	-0.678101	0.624988	0.153701	-4.41182	1.02505e-05	3.81978e-05		282.113	0.00231835	1.00161	0.171498	0.0135183	0.989214	0.997175
C27C12.7	dpf-2	154.858	205.589	256.868	158.049	198.33	214.542	176.79	194.544	168.37	277.921	293.03	320.997	284.659	242.069	278.486	301.542	298.001	403.638	500.034	329.994	350.75	322.692	303.98	354.796		274.605	-0.115736	0.922911	0.185863	-0.622697	0.533484	0.614523		274.605	0.724887	1.65277	0.186896	3.87857	0.000105074	0.000338368		274.605	0.315676	1.24459	0.182895	1.726	0.0843479	0.200216
C27D11.1	egl-45	5559.79	6558.74	6844.91	4020.76	4106.6	4077.1	5557.28	5586.78	5823.97	3709.95	3455.03	3808.63	4796.35	5050.82	5086.25	3659.04	3278.01	4050.11	4939.2	6743.05	6139.28	6603.31	7295.53	7354.82		5171.06	-0.635933	0.643525	0.10766	-5.90686	3.48695e-09	3.79231e-08		5171.06	-0.628794	0.646717	0.108034	-5.82035	5.87248e-09	3.29789e-08		5171.06	-0.442932	0.735638	0.108129	-4.09633	4.19744e-05	0.000677163
C27D6.1	C27D6.1	30.2163	39.3682	35.8799	56.8975	68.4434	70.9824	63.6445	67.2247	68.9708	25.9926	30.1792	34.4628	45.9128	42.0989	36.2342	59.3197	39.7951	73.965	57.8642	40.0361	49.6127	15.4228	17.605	13.185		45.1381	0.893158	1.85724	0.227778	3.92118	8.81165e-05	0.000297954		45.1381	-1.14002	0.453752	0.243849	-4.67513	2.9377e-06	1.17741e-05		45.1381	0.468858	1.38401	0.23576	1.98871	0.046733	0.131676
C27D8.4	C27D8.4	1184.1	751.495	492.534	572.926	486.882	496.079	78.798	70.2804	68.9708	103.971	101.246	97.4805	225.483	190.498	201.876	184.88	256.355	173.289	287.138	417.346	286.138	231.341	199.524	222.946		307.566	-0.641199	0.64118	0.223435	-2.86974	0.00410814	0.00906838		307.566	0.473112	1.3881	0.254119	1.86177	0.0626352	0.10932		307.566	-0.0063955	0.995577	0.234422	-0.027282	0.978235	0.992531
C27F2.1	wdr-60	192.629	213.463	246.267	298.712	273.774	314.237	95.9719	116.115	114.613	134.962	139.214	124.066	180.59	215.757	213.264	224.426	197.125	214.498	94.9847	87.3515	117.686	119.823	93.8935	105.48		172.038	0.439906	1.35652	0.129887	3.38683	0.00070706	0.00191824		172.038	0.285927	1.21919	0.154408	1.85176	0.0640602	0.11155		172.038	0.0608187	1.04306	0.137853	0.441185	0.659079	0.790462
C27F2.10	C27F2.10	2619.37	2036.65	1312.06	1223.3	1148.76	1075.1	863.747	817.901	930.091	865.755	873.249	834.985	1082.52	1014.58	1160.53	863.102	1001.36	845.314	529.512	708.518	655.349	330.996	303.98	321.234		975.749	-0.791348	0.577804	0.168361	-4.7003	2.59776e-06	1.28489e-05		975.749	-0.0210097	0.985543	0.170788	-0.123016	0.902094	0.932832		975.749	-0.265391	0.831973	0.17025	-1.55883	0.119038	0.254926
C27F2.4	C27F2.4	1757.26	1318.4	872.535	1122.94	1101.32	955.47	630.384	685.489	692.75	662.812	781.738	679.41	1964.05	1765	1711.29	1928.88	2271.1	1976.98	411.6	445.25	497.28	446.074	449.515	462.673		1066.26	-0.311477	0.805816	0.167041	-1.86467	0.0622275	0.0989577		1066.26	0.0806306	1.05748	0.17012	0.473963	0.635526	0.7202		1066.26	0.183287	1.13547	0.166294	1.10219	0.270379	0.447076
C27F2.8	tmem-131	4905.42	6565.74	8974.88	4385.06	4541.38	3896.85	6434.16	7016.84	6203.31	7651.83	7439.65	7801.4	7267.48	7961.96	9352.57	5537.5	4420.96	5788.29	3669.46	4326.32	4729.36	6007.76	5624.22	5368.68		6077.96	-0.673187	0.62712	0.1638	-4.1098	3.96002e-05	0.000144902		6077.96	0.220054	1.16478	0.163738	1.34393	0.178969	0.263966		6077.96	-0.642625	0.640546	0.163804	-3.92313	8.74058e-05	0.00121867
C27H5.1	pdl-1	621.322	432.175	373.478	999.657	840.765	914.795	381.867	359.55	390.496	296.916	343.653	297.365	392.809	416.78	382.012	474.558	389.622	378.278	276.22	196.541	234.218	196.937	227.692	206.165		417.661	0.951106	1.93335	0.154995	6.13637	8.44284e-10	1.09039e-08		417.661	-0.271073	0.828703	0.161859	-1.67475	0.0939839	0.154408		417.661	0.0604928	1.04282	0.160042	0.377982	0.705444	0.825013
C27H5.4	mfsd-13.2	51.9342	53.3658	50.5581	133.551	132.22	153.13	143.453	124.264	83.1706	282.92	323.209	300.319	104.069	154.714	103.526	168.073	180.466	150.043	91.7093	66.7268	53.074	743.852	819.221	723.975		216.314	1.42661	2.68815	0.201105	7.09387	1.30412e-12	3.95973e-11		216.314	1.36925	2.58336	0.181919	7.52669	5.20409e-14	4.69482e-13		216.314	0.463106	1.37851	0.186806	2.47908	0.0131723	0.0530678
C27H5.6	C27H5.6	25.495	17.497	20.3863	36.3512	32.6662	26.3193	4.04092	7.1299	6.08566	13.996	3.89409	7.87722	5.10142	0	0	0.988662	3.70187	5.28321	1.09178	3.63964	1.15378	14.2364	10.563	9.58908		10.712	0.592807	1.50818	0.366607	1.61701	0.105876	0.157082		10.712	0.57429	1.48894	0.539107	1.06526	0.286757	0.388089		10.712	0.935278	1.91226	0.844457	1.10755	0.268056	0.444647
C27H5.8	glc-4	224.733	200.34	265.022	315.307	370.217	340.556	201.036	231.212	224.155	177.95	210.281	162.468	457.087	408.36	384.083	456.762	492.349	494.509	300.239	150.439	230.757	149.482	165.487	159.418		282.177	0.571295	1.48586	0.168793	3.3846	0.000712822	0.00193247		282.177	-0.253026	0.839135	0.176603	-1.43273	0.151934	0.230268		282.177	0.208182	1.15523	0.165528	1.25769	0.208505	0.376736
C27H6.1	unc-41	705.361	977.206	1707.56	1222.51	1360.31	1411.67	1780.03	1935.26	1802.37	1372.61	1083.53	1344.05	1888.54	1980.76	1881.07	2202.74	1395.61	2024.53	2959.81	1927.8	2135.65	1592.1	1575.06	1545.04		1658.8	0.236011	1.17773	0.224356	1.05195	0.292823	0.373446		1658.8	-0.53801	0.68872	0.224295	-2.39867	0.0164547	0.0339521		1658.8	-0.0324959	0.977727	0.223891	-0.145142	0.884599	0.938254
C27H6.2	ruvb-1	3020.68	3012.1	2172.37	1520.43	1522.09	1551.24	2157.85	1905.72	2216.19	1814.49	1617.02	1728.06	1956.9	1955.5	2146.1	1507.71	1666.77	1989.66	1705.36	3026.97	2421.79	1373.81	1421.31	1354.46		1948.52	-0.836672	0.559934	0.160358	-5.21754	1.81318e-07	1.19049e-06		1948.52	-0.283489	0.821602	0.160837	-1.76259	0.0779705	0.131751		1948.52	-0.230623	0.852267	0.160902	-1.43331	0.15177	0.303405
C27H6.3	tofu-1	748.797	683.257	383.263	294.761	263.663	245.647	221.241	175.192	266.755	315.911	329.05	293.426	96.9269	95.7751	76.6095	96.8889	92.5468	91.9279	311.157	539.881	389.979	116.264	115.02	123.459		265.308	-1.17385	0.443236	0.212906	-5.51349	3.51788e-08	2.80789e-07		265.308	0.500732	1.41493	0.21829	2.29388	0.0217971	0.0433827		265.308	0.0632127	1.04479	0.240013	0.263372	0.792264	0.883903
C27H6.8	C27H6.8	2814.83	2261.48	1379.75	1395.57	1398.42	1391.73	951.637	840.309	939.22	1867.47	2154.4	1863.95	420.357	407.307	464.833	355.918	516.411	433.224	500.034	646.644	644.965	313.201	322.759	327.227		1025.49	-0.624772	0.648522	0.181056	-3.45071	0.000559109	0.00155079		1025.49	1.10773	2.15507	0.182284	6.07695	1.22487e-09	7.3696e-09		1025.49	0.015004	1.01045	0.188021	0.0797995	0.936397	0.969365
C27H6.9	C27H6.9	1091.56	723.5	455.023	422.78	393.55	340.556	101.023	65.1876	112.585	93.9734	80.8023	69.9103	149.982	134.717	211.194	130.503	188.795	172.233	64.4149	139.52	104.994	28.4728	37.5574	27.5686		222.517	-0.971828	0.50986	0.273384	-3.5548	0.00037826	0.00110003		222.517	-0.188628	0.87744	0.297447	-0.634155	0.52598	0.625684		222.517	-0.0125165	0.991362	0.2847	-0.0439639	0.964933	0.98568
C28A5.3	nex-3	289.887	186.343	156.567	330.322	311.884	339.758	180.831	179.266	181.555	188.947	243.38	225.485	148.961	155.766	145.972	200.698	228.591	207.102	102.627	87.3515	95.764	121.009	139.667	133.048		190.866	0.63856	1.55677	0.163046	3.91644	8.98655e-05	0.000302667		190.866	0.280659	1.21475	0.170392	1.64714	0.0995299	0.161907		190.866	0.498579	1.41282	0.17331	2.87681	0.00401723	0.0225857
C28C12.10	tag-77	718.581	803.986	933.694	715.17	780.099	799.15	713.223	642.709	623.78	1104.69	1047.51	1127.43	766.233	740.941	800.258	695.03	709.834	632.929	841.761	1079.76	969.178	1550.58	1455.35	1583.4		909.803	-0.0995633	0.933315	0.105737	-0.941616	0.346389	0.429107		909.803	0.728167	1.65653	0.106836	6.81575	9.37714e-12	6.76277e-11		909.803	-0.1787	0.883499	0.108013	-1.65444	0.0980382	0.222362
C28C12.13	sru-7	4.72129	0.874849	4.89272	1.58049	3.11106	3.19022	1.01023	0	1.01428	5.9983	2.92056	5.90791	2.04057	0	1.03526	2.96599	0.925468	5.28321	3.27533	2.42643	2.30757	9.49093	4.69468	11.9863		3.40224	-0.412494	0.751323	0.77312	-0.533545	0.593656	0.669326		3.40224	2.86772	7.29913	1.18119	2.42782	0.0151899	0.0317249		3.40224	1.53268	2.89322	1.06752	1.43574	0.151076	NA
C28D4.1	nhr-100	537.283	465.42	421.589	622.711	629.213	590.988	370.755	394.181	348.911	242.931	244.354	204.808	290.781	293.64	280.556	352.952	288.746	251.481	352.644	270.547	279.215	277.61	285.202	294.864		357.974	0.373186	1.29521	0.124274	3.00293	0.0026739	0.00629069		357.974	-0.686506	0.621357	0.134648	-5.09851	3.42338e-07	1.52964e-06		357.974	0.0473689	1.03338	0.134412	0.352415	0.724527	0.839285
C28D4.2	cka-1	802.62	860.851	756.741	724.653	791.766	752.892	406.113	437.979	360.068	472.866	398.17	401.738	641.758	669.373	699.838	569.47	525.666	539.944	8978.78	6294.16	7808.8	4708.69	4624.26	5077.42		2012.69	-0.0926407	0.937805	0.117952	-0.785412	0.432212	0.515508		2012.69	0.0797434	1.05683	0.125699	0.634399	0.525821	0.625592		2012.69	-0.298622	0.813028	0.121518	-2.45743	0.0139936	0.0555071
C28D4.9	nhr-138	505.178	525.784	466.439	482.048	476.771	488.103	582.903	598.911	539.595	446.874	428.35	512.019	275.477	254.699	280.556	247.166	244.324	188.082	370.113	217.165	302.291	287.101	281.681	302.056		387.654	-0.0491467	0.966508	0.135604	-0.362428	0.717033	0.773829		387.654	-0.311387	0.805867	0.136893	-2.27468	0.0229251	0.0453303		387.654	-0.252566	0.839402	0.147374	-1.71378	0.0865699	0.204515
C28F5.2	glb-9	32.1048	32.3694	33.4336	48.9951	54.4436	44.6631	45.4604	56.0206	36.5139	109.969	143.108	119.143	438.722	365.208	407.894	319.338	351.678	329.673	44.7629	43.6757	46.1513	93.7229	92.7198	95.8908		141.069	0.596798	1.51236	0.20441	2.91961	0.00350467	0.00794612		141.069	1.43267	2.69945	0.18143	7.89651	2.86824e-15	2.87468e-14		141.069	-0.275971	0.825894	0.126256	-2.18581	0.0288294	0.0927733
C28G1.3	sec-15	801.675	920.341	857.041	786.292	763.766	776.818	948.607	958.462	874.306	829.765	778.817	780.829	1133.53	1226.13	1132.58	895.728	813.486	874.9	699.829	776.458	777.65	550.474	667.818	552.571		840.745	-0.148931	0.901919	0.0866429	-1.71891	0.0856314	0.131099		840.745	-0.219232	0.859023	0.0878157	-2.4965	0.0125426	0.0267682		840.745	-0.434847	0.739772	0.0866516	-5.01834	5.21204e-07	1.96923e-05
C28H8.1	bcl-7	7333.11	5631.4	3066.92	4837.08	3658.61	4146.49	764.745	642.709	802.292	659.813	714.565	659.717	2868.02	2508.04	2937.04	2631.82	3259.5	2413.37	2265.44	3355.75	2982.53	1974.11	2085.61	1847.1		2668.57	-0.342523	0.788661	0.21281	-1.60953	0.107501	0.159129		2668.57	-0.119486	0.920515	0.216814	-0.551099	0.581566	0.67364		2668.57	-0.00136663	0.999053	0.213428	-0.00640321	0.994891	1
C28H8.11	tdo-2	799.787	629.891	562.663	1449.31	1369.65	1435.6	920.32	867.81	751.578	386.89	453.661	409.615	1351.88	1339.8	1282.69	1665.9	1846.31	1737.12	519.686	454.956	509.972	922.993	929.546	961.305		981.621	1.09635	2.13813	0.110717	9.90225	4.07e-23	7.56918e-21		981.621	-1.02233	0.492322	0.115874	-8.82271	1.1172e-18	1.49229e-17		981.621	0.401533	1.32091	0.109039	3.68248	0.00023098	0.00257539
C28H8.12	dnc-2	2980.08	2131.13	1348.76	1903.7	1725.86	1607.87	624.323	612.153	645.08	532.849	522.781	524.819	897.849	819.877	886.185	716.78	831.07	734.367	675.81	760.686	753.42	743.852	746.453	664.044		1016.24	-0.302167	0.811033	0.174738	-1.72926	0.0837621	0.128635		1016.24	-0.251603	0.839963	0.179882	-1.39871	0.161899	0.242512		1016.24	-0.190053	0.876573	0.177954	-1.06799	0.285526	0.464142
C28H8.2	C28H8.2	289.887	174.97	124.764	175.434	150.887	153.928	12.1228	17.3155	11.157	13.996	8.76169	9.84652	16.3245	22.1019	23.811	39.5465	43.497	51.7755	9.826	24.2643	11.5378	11.8637	15.2577	13.185		59.4192	-0.293314	0.816025	0.262027	-1.1194	0.262968	0.340834		59.4192	-0.317888	0.802243	0.420938	-0.755191	0.450135	0.556036		59.4192	1.11427	2.16486	0.334812	3.32806	0.000874537	0.00712528
C28H8.3	C28H8.3	2058.48	2455.7	2581.72	1736.16	1819.19	1698.79	3656.03	3535.41	3641.25	4812.64	4544.4	4785.41	5571.77	5821.23	5534.52	5309.12	4066.51	4789.76	4321.26	5157.38	5018.96	9788.71	9577.14	9952.26		4676.41	-0.433915	0.74025	0.0997213	-4.35128	1.35348e-05	5.5474e-05		4676.41	0.384627	1.30552	0.0985622	3.90238	9.52509e-05	0.000308833		4676.41	-0.257134	0.836748	0.0982212	-2.61791	0.00884701	0.0396512
C28H8.4	erd-2.2	6650.41	5640.15	4460.53	4143.24	4301.82	3973.42	3750.99	3541.52	3821.79	3745.94	4377.93	4171.97	3555.69	3306.87	3373.92	2933.36	3631.54	3110.76	4386.76	5747	5093.95	2489	2720.56	2399.67		3972.03	-0.431573	0.741453	0.127603	-3.38216	0.00071919	0.00194547		3972.03	0.14577	1.10632	0.128055	1.13834	0.254977	0.35282		3972.03	-0.0811722	0.945289	0.128315	-0.632599	0.526995	0.692281
C28H8.5	C28H8.5	17.9409	19.2467	3.26181	46.6243	62.2213	65.3995	29.2967	34.6309	36.5139	26.9924	42.835	38.4014	4.08113	3.15742	9.31737	5.93197	9.25468	7.3965	13.1013	9.70572	2.30757	30.8455	18.7787	17.9795		23.1343	2.12561	4.36389	0.38664	5.49766	3.84865e-08	3.04252e-07		23.1343	0.108642	1.07821	0.366532	0.296406	0.76692	0.827214		23.1343	0.45196	1.3679	0.561485	0.804938	0.420855	0.59939
C28H8.6	pxl-1	1597.69	1768.07	1785.84	1851.54	1697.86	1667.69	1250.67	1277.27	1200.9	1794.49	1826.33	1802.9	614.211	672.531	589.065	639.665	759.809	571.644	817.741	763.112	792.649	1208.91	1212.4	1306.51		1227.9	0.0178717	1.01246	0.0886239	0.201658	0.840184	0.875737		1227.9	0.540572	1.45455	0.0901641	5.99542	2.02957e-09	1.18815e-08		1227.9	0.073727	1.05243	0.0968407	0.761323	0.446464	0.623085
C28H8.8	C28H8.8	8.49832	7.87364	12.2318	6.32194	10.111	6.38044	6.06138	2.03711	4.0571	2.99915	7.78817	9.84652	82.643	86.3028	62.1158	109.742	103.652	86.6447	3.27533	4.85286	6.9227	0	3.52101	1.19863		26.4616	-0.334066	0.793298	0.420115	-0.795176	0.426511	0.510427		26.4616	0.76563	1.70011	0.560405	1.36621	0.171874	0.255437		26.4616	0.378373	1.29988	0.24	1.57655	0.114899	0.248692
C28H8.9	dpff-1	3572.13	3501.15	3377.61	2625.19	2624.18	2584.08	1807.3	1834.42	1671.53	1319.63	1251.95	1318.45	3582.22	3676.29	3466.06	2967.96	3338.16	2645.83	2221.77	2593.85	2660.62	1711.93	1728.81	1669.7		2489.62	-0.415802	0.749603	0.0836511	-4.97067	6.67202e-07	3.76294e-06		2489.62	-0.449856	0.732116	0.0868218	-5.18137	2.20263e-07	1.01158e-06		2489.62	-0.260151	0.835001	0.0839303	-3.09961	0.00193777	0.0130473
C29A12.1	C29A12.1	1490.98	980.706	591.204	572.136	485.326	448.226	199.015	149.728	225.169	154.956	175.234	175.268	383.627	329.424	541.442	284.735	408.131	308.54	219.447	340.913	248.063	122.196	116.193	113.87		377.689	-1.02387	0.491796	0.250916	-4.08052	4.49358e-05	0.000162414		377.689	-0.183201	0.880747	0.262698	-0.697381	0.485564	0.588871		377.689	-0.324549	0.798548	0.255045	-1.27252	0.203189	0.370785
C29A12.3	lig-1	4374.75	4297.26	3299.32	2187.39	2080.52	1958.79	2390.21	2058.5	2372.39	2474.3	2287.78	2365.13	2592.54	2609.08	2705.14	1805.3	2028.63	1940	1030.64	1938.72	1584.14	1576.68	1582.11	1400.01		2289.14	-0.942918	0.52018	0.156033	-6.04307	1.51213e-09	1.79693e-08		2289.14	0.0633134	1.04486	0.156613	0.404268	0.686016	0.761936		2289.14	-0.453495	0.730271	0.156715	-2.89375	0.00380671	0.0217033
C29A12.4	nrx-1	643.04	775.116	1338.97	1094.49	1181.43	1196.33	1640.61	1613.39	1532.57	1256.64	1150.7	1191.43	789.699	863.028	774.377	910.558	616.362	948.865	1850.56	1363.65	1385.69	1217.21	1146.67	1289.73		1157.13	0.331811	1.25859	0.197243	1.68225	0.0925212	0.139863		1157.13	-0.411507	0.751838	0.196929	-2.08962	0.0366518	0.0687458		1157.13	0.0281438	1.0197	0.198723	0.141624	0.887377	0.939131
C29E4.12	C29E4.12	2546.66	2078.64	958.973	1735.37	1294.2	1556.03	268.721	260.75	261.683	277.921	362.15	325.92	311.186	268.381	260.886	293.633	424.79	272.614	314.432	265.694	310.368	417.601	420.173	401.543		662.014	-0.283912	0.821361	0.231555	-1.22611	0.220158	0.293241		662.014	0.288169	1.22109	0.240261	1.1994	0.230372	0.324996		662.014	0.238732	1.17995	0.239949	0.994927	0.319772	0.49931
C29E4.13	C29E4.13	1217.15	894.096	653.993	543.687	487.659	445.833	1166.82	1158.1	1348.99	1512.57	1463.2	1500.61	324.45	356.789	416.176	351.964	407.206	326.503	550.256	661.202	627.658	641.824	577.445	635.276		761.227	-0.903453	0.534606	0.164359	-5.49681	3.86713e-08	3.05106e-07		761.227	0.285012	1.21842	0.162095	1.75831	0.0786955	0.132858		761.227	-0.0145154	0.989989	0.170596	-0.0850863	0.932193	0.966522
C29E4.15	C29E4.15	692.141	519.66	303.349	1049.44	790.21	796.757	385.908	366.68	376.296	443.874	492.602	428.324	581.562	573.598	487.609	498.286	703.356	497.679	558.99	613.887	655.349	778.256	673.686	672.434		580.831	0.800672	1.74191	0.20273	3.94945	7.83318e-05	0.000267913		580.831	0.273827	1.20901	0.206503	1.32602	0.184833	0.271243		580.831	0.0494903	1.0349	0.204437	0.242082	0.808717	0.892968
C29E4.2	kle-2	3854.46	4323.5	4165.33	2561.18	2361.3	2253.09	1951.77	1845.62	1985.95	2274.36	2160.24	2293.25	2927.19	3027.97	3462.95	2071.25	2148.94	1838.56	1773.05	2751.57	2422.94	2997.95	2733.47	2690.93		2619.87	-0.782615	0.581312	0.122054	-6.41203	1.43596e-10	2.29723e-09		2619.87	0.218225	1.1633	0.12325	1.77059	0.0766281	0.129709		2619.87	-0.636194	0.643408	0.122839	-5.17908	2.22985e-07	9.19162e-06
C29E4.3	ran-2	1623.18	1913.29	1718.16	1113.45	1106.76	983.385	2446.78	2042.21	2490.05	2665.25	2426.02	2615.24	903.971	963.013	1049.76	816.635	752.405	784.029	2335.31	3683.32	2660.62	2026.31	1984.67	2217.47		1805.05	-0.713946	0.609651	0.134378	-5.31296	1.07856e-07	7.61956e-07		1805.05	0.143019	1.10421	0.13329	1.07299	0.283275	0.384466		1805.05	-0.309896	0.8067	0.137158	-2.2594	0.0238585	0.08107
C29E4.5	tag-250	609.991	732.249	764.895	794.194	846.209	799.947	1694.16	1874.14	1558.94	951.731	995.913	997.452	1289.64	1394.53	1301.33	1222.98	1025.42	1198.23	1975.03	1764.01	2080.27	1618.2	1569.2	1579.8		1276.6	0.210549	1.15713	0.10116	2.08136	0.0374011	0.0631443		1276.6	-0.799809	0.574425	0.099011	-8.07798	6.58479e-16	7.01669e-15		1276.6	-0.210079	0.86449	0.0991651	-2.11847	0.034135	0.105561
C29E6.1	let-653	1112.34	1450.5	1876.36	1420.07	1521.31	1319.16	3050.9	3199.29	2978.93	2746.22	2633.38	2618.19	2416.03	2809.05	2184.4	2224.49	1778.75	3275.59	1117.98	1192.59	1571.45	1509.06	1443.61	1289.73		2030.81	-0.0596551	0.959493	0.191007	-0.312318	0.754799	0.805588		2030.81	-0.206594	0.866581	0.19019	-1.08625	0.277369	0.378014		2030.81	-0.0259553	0.98217	0.190424	-0.136303	0.891582	0.941603
C29E6.2	trpa-1	178.465	267.704	344.121	381.687	430.882	378.041	857.686	1020.59	871.263	649.816	580.219	633.131	1169.24	1207.19	1178.13	1164.64	1167.94	1165.48	441.078	354.259	383.056	754.529	691.291	714.386		707.701	0.587093	1.50222	0.151844	3.86642	0.000110446	0.00036322		707.701	-0.561481	0.677606	0.145751	-3.85234	0.000116995	0.000372958		707.701	-0.0230976	0.984117	0.143421	-0.161048	0.872056	0.930091
C29E6.4	cutl-27	56.6555	63.864	93.7771	105.893	108.109	106.872	153.555	172.136	148.084	131.963	111.955	102.404	191.813	182.078	160.466	259.03	186.945	210.272	191.061	117.682	154.607	144.737	124.409	166.61		143.541	0.575294	1.48998	0.199129	2.88905	0.00386412	0.00860892		143.541	-0.452411	0.730821	0.190908	-2.36979	0.0177984	0.0364175		143.541	0.295715	1.22749	0.182312	1.62202	0.104798	0.233333
C29E6.5	nhr-43	474.018	560.778	729.831	945.921	1046.87	991.36	1451.7	1489.13	1124.83	574.837	565.616	537.62	600.947	727.259	578.712	599.129	442.374	593.833	352.644	285.106	318.444	97.282	106.804	105.48		637.522	0.7567	1.68962	0.155328	4.87163	1.10682e-06	5.92346e-06		637.522	-1.2767	0.41274	0.155834	-8.19264	2.55552e-16	2.85128e-15		637.522	-0.222397	0.85714	0.157904	-1.40843	0.159004	0.313536
C29F4.3	C29F4.3	15.1081	5.24909	15.4936	22.1268	13.9998	17.5462	5.05115	11.2041	10.1428	19.9943	26.2851	15.7544	26.5274	27.3643	23.811	37.5692	42.5715	32.7559	5.45889	4.85286	5.76891	193.378	232.386	260.104		44.6043	0.580646	1.49552	0.339129	1.71217	0.0868657	0.132584		44.6043	1.2349	2.35366	0.382981	3.22446	0.00126212	0.00333416		44.6043	0.543451	1.45745	0.281971	1.92733	0.053939	0.146108
C29F5.1	C29F5.1	1313.46	1237.91	1232.15	1925.03	1945.97	2127.08	1339.57	1443.29	1266.83	668.811	682.439	608.515	887.647	801.985	834.422	897.705	980.071	964.715	1612.56	1131.93	1348.77	829.27	891.988	876.202		1160.35	0.664949	1.58551	0.1037	6.41227	1.43368e-10	2.29723e-09		1160.35	-1.04711	0.483938	0.107543	-9.73666	2.1035e-22	3.66038e-21		1160.35	0.171362	1.12612	0.107592	1.59271	0.111225	0.242998
C29F5.3	C29F5.3	1.88852	0.874849	2.44636	4.74146	6.22213	2.39266	2.02046	1.01856	0	3.99887	1.94704	0.984652	33.6694	32.6267	32.0932	42.5125	42.5715	30.6426	0	3.63964	0	7.1182	9.38935	2.39727		11.0498	1.35214	2.5529	0.737431	1.83358	0.0667162	0.105216		11.0498	1.18206	2.26901	1.03199	1.14542	0.252036	0.349771		11.0498	0.237273	1.17876	0.337101	0.703862	0.481519	0.652161
C29F5.7	glb-10	47.2129	34.994	32.6181	43.4634	41.2216	49.4484	78.798	91.6701	65.9279	106.97	131.425	121.112	34.6896	31.5742	50.7279	50.4218	59.23	40.1524	36.0287	24.2643	35.7673	32.0319	36.3837	32.3631		54.5207	0.231354	1.17394	0.23015	1.00523	0.314785	0.396291		54.5207	0.605368	1.52137	0.198486	3.04992	0.00228899	0.00574671		54.5207	0.362609	1.28575	0.238452	1.52068	0.128341	0.267694
C29F5.8	C29F5.8	0	0	0.815453	0.790243	0	3.19022	0	1.01856	0	0.999717	0	0.984652	0	0	0	0	0.925468	0	0	1.21321	1.15378	1.18637	0	0		0.51157	2.07508	4.21367	2.003	1.03598	0.300209	NA		0.51157	0.859592	1.81453	2.1531	0.399235	0.68972	0.764486		0.51157	0.894642	1.85915	2.23298	0.40065	0.688678	NA
[truncated: 6,587 more rows]

## Sheet: elegans only
	Alternate gene name	CELEG:HB101_1	CELEG:HB101_2	CELEG:HB101_3	CELEG:446_1	CELEG:446_2	CELEG:446_3	CBRIG:HB101_1	CBRIG:HB101_2	CBRIG:HB101_3	CBRIG:446_1	CBRIG:446_2	CBRIG:446_3	CKAMA:HB101_1	CKAMA:HB101_2	CKAMA:HB101_3	CKAMA:446_1	CKAMA:446_2	CKAMA:446_3	CTROP:HB101_1	CTROP:HB101_2	CTROP:HB101_3	CTROP:446_1	CTROP:446_2	CTROP:446_3		baseMeanCELEG	log2FoldChangeCELEG	lfcSECELEG	statCELEG	pvalueCELEG	padjCELEG		baseMeanCBRIG	log2FoldChangeCBRIG	lfcSECBRIG	statCBRIG	pvalueCBRIG	padjCBRIG		baseMeanCKAMA	log2FoldChangeCKAMA	lfcSECKAMA	statCKAMA	pvalueCKAMA	padjCKAMA		baseMeanCTROP	log2FoldChangeCTROP
[truncated: 562 more rows]
[truncated: 4 more columns]

[truncated: 4 more sheets: elegans and brig, elegans and kama, elegans and trop, All 4]
