# Supplementary material for: Intergenerational adaptations to stress are evolutionarily conserved, stress-specific, and have deleterious trade-offs
Source: eLife. 2021 Oct 8;10:e73425. doi: 10.7554/eLife.73425 (PMC8570697; doi:10.7554/eLife.73425)
Supplement: Supplementary file 3. [file elife-73425-supp3.xlsx]

## Sheet: All single copy
	Alternate gene name	CELEG:NONE_1	CELEG:NONE_2	CELEG:NONE_3	CELEG:NACL_1	CELEG:NACL_2	CELEG:NACL_3	CBRIG:NONE_1	CBRIG:NONE_2	CBRIG:NONE_3	CBRIG:NACL_1	CBRIG:NACL_2	CBRIG:NACL_3	CKAMA:NONE_1	CKAMA:NONE_2	CKAMA:NONE_3	CKAMA:NACL_1	CKAMA:NACL_2	CKAMA:NACL_3	CTROP:NONE_1	CTROP:NONE_2	CTROP:NONE_3	CTROP:NACL_1	CTROP:NACL_2	CTROP:NACL_3		baseMeanCELEG	log2FoldChangeCELEG	Fold Change	lfcSECELEG	statCELEG	pvalueCELEG	padjCELEG		baseMeanCBRIG	log2FoldChangeCBRIG	Fold Change	lfcSECBRIG	statCBRIG	pvalueCBRIG	padjCBRIG		baseMeanCKAMA	log2FoldChangeCKAMA	Fold Change	lfcSECKAMA	statCKAMA	pvalueCKAMA	padjCKAMA
2RSSE.1	rga-9	3038.82	3747.1	4803.26	4906.85	5311.56	4900.81	6339.48	6935.8	6178.67	3182.13	4447.39	4901.37	10338	11434.6	10460.4	7629.07	9224.57	8514.35	2705.74	2493.32	2812.42	2267.83	2363.9	2322.17		5469.15	0.383425	1.30443	0.157356	2.43667	0.0148232	0.034973		5469.15	-0.633728	0.644509	0.157504	-4.02357	5.73226e-05	0.000231526		5469.15	-0.345556	0.787005	0.15696	-2.20156	0.0276964	0.283579
4R79.1	nas-6	116.268	129.635	151.909	109.938	123.957	95.9745	209.696	201.995	173.886	102.649	165.875	113.134	334.26	290.223	281.499	324.562	294.445	315.636	179.77	104.172	103.158	89.8999	80.1131	99.2826		174.664	-0.272144	0.828088	0.208866	-1.30296	0.192589	0.289195		174.664	-0.605474	0.657255	0.209892	-2.88469	0.00391796	0.00826508		174.664	0.0450653	1.03173	0.195551	0.230453	0.817739	0.963325
4R79.2	4R79.2	29.9478	22.9733	50.1224	29.2023	38.9579	26.1749	27.6417	32.549	33.4395	19.8676	20.4651	19.9649	61.473	39.6208	65.4876	65.2854	73.0965	70.3584	35.7497	13.5876	20.6317	21.4047	6.77012	12.541		34.888	-0.133846	0.911399	0.327416	-0.408794	0.682691	0.773029		34.888	-0.633468	0.644625	0.368524	-1.71893	0.0856269	0.120648		34.888	0.324216	1.25198	0.305518	1.0612	0.288599	0.708858
AC3.1	sri-20	15.8547	15.589	11.5667	6.87114	10.6249	10.4699	17.1569	16.2745	24.8408	11.5894	10.7711	21.074	0.960516	4.9526	0.977426	6.52854	4.11811	0.9772	3.06426	5.6615	4.34351	13.9131	12.4119	4.18032		9.78217	-0.618768	0.651227	0.470421	-1.31535	0.188392	0.283924		9.78217	-0.406589	0.754405	0.458136	-0.887486	0.374817	0.44011		9.78217	0.775146	1.71136	0.766333	1.0115	0.311777	0.727497
AC3.10	spe-10	7.92735	3.28189	0	2.57668	8.85407	8.72495	0.953161	0.957323	0.955415	1.65564	1.07711	3.32748	104.696	154.521	202.327	133.369	128.691	112.378	2.04284	0	2.17175	1.07024	0	1.04508		36.7751	0.896165	1.86111	0.579508	1.54642	0.122002	0.200835		36.7751	1.10294	2.14792	1.09489	1.00735	0.313766	0.376403		36.7751	-0.301417	0.811455	0.311106	-0.968857	0.332616	0.744935
AC3.5	AC3.5	10.5698	21.3323	21.5912	38.6501	38.9579	40.1348	41.9391	27.7624	27.707	44.7022	66.7809	46.5847	57.631	55.4691	74.2844	350.676	355.187	392.834	52.0925	50.9535	33.6622	219.398	145.558	237.233		102.154	1.12585	2.18231	0.294727	3.81999	0.000133458	0.000574613		102.154	0.713017	1.63923	0.27659	2.57789	0.00994067	0.018353		102.154	2.55168	5.86317	0.228927	11.1463	7.46745e-29	8.09365e-26
AC3.6	col-151	3.52327	4.10237	5.39779	4.29446	3.54163	6.10747	0	0	0	0	0	1.10916	1.92103	2.97156	0	6.52854	2.05906	0	3.06426	6.7938	4.34351	1.07024	7.89848	3.13524		2.82758	0.0934655	1.06693	0.808577	0.115593	0.907975	0.942566		2.82758	1.3558	2.5594	1.7798	0.761774	0.446195	NA		2.82758	0.833558	1.78207	1.0211	0.816335	0.414308	0.79943
AH9.1	AH9.1	36.9943	31.178	23.9045	20.6134	26.5622	23.5574	31.4543	22.9757	42.0383	14.9007	38.776	25.5106	66.2756	52.4976	51.8036	55.0263	54.565	62.5408	31.664	27.1752	27.1469	27.8262	18.0537	27.1721		35.0089	-0.37522	0.770988	0.298088	-1.25876	0.208119	0.307976		35.0089	-0.233465	0.850589	0.311155	-0.750318	0.453063	0.51844		35.0089	0.012553	1.00874	0.261217	0.0480558	0.961672	0.999373
AH9.4	AH9.4	12.3314	15.589	12.3378	16.319	12.3957	14.8324	5.71897	10.5306	12.4204	6.62254	4.30844	6.65495	70.1177	48.5355	53.7585	80.2078	57.6536	62.5408	28.5998	21.5137	20.6317	17.1238	29.3372	27.1721		26.9689	0.114349	1.08249	0.362213	0.315696	0.752233	0.827179		26.9689	-0.728668	0.603461	0.51517	-1.41442	0.157238	0.205838		26.9689	0.218482	1.16351	0.262596	0.832007	0.405405	0.79474
B0001.1	lin-24	2072.56	1593.36	1315.52	1503.06	1498.11	1430.89	1241.02	1273.24	1212.42	1178.81	1105.12	1144.65	1359.13	1419.42	1404.56	1149.02	1142.78	1239.09	833.479	705.423	721.022	667.828	686.039	743.052		1193.32	-0.167984	0.890086	0.130292	-1.28929	0.197298	0.295134		1193.32	-0.12087	0.919633	0.132402	-0.912904	0.361293	0.42584		1193.32	-0.24451	0.844102	0.131473	-1.85978	0.0629168	0.402772
B0001.2	B0001.2	629.784	786.014	607.637	319.508	296.611	326.313	693.902	725.651	758.6	1405.63	793.831	929.475	2511.75	2672.42	2664.46	2577.84	2632.5	2685.35	460.661	533.313	602.662	595.052	660.087	594.65		1144.32	-1.10224	0.465792	0.168478	-6.54237	6.05524e-11	1.17218e-09		1144.32	0.517962	1.43193	0.165457	3.13049	0.00174514	0.00417024		1144.32	0.00862341	1.006	0.161642	0.053349	0.957454	0.998861
B0001.6	eri-12	4086.99	4323.07	4656.75	6772.36	7020.39	7306.27	934.098	796.493	1005.1	8887.45	3353.05	2655.33	5700.66	6229.38	6333.72	4874.96	5713.88	5027.7	1829.36	2099.28	2318.35	2014.19	2283.79	1957.43		4090.84	0.691253	1.61469	0.265598	2.60263	0.00925113	0.0234557		4090.84	2.44409	5.44182	0.266891	9.15764	5.30449e-20	3.79006e-17		4090.84	-0.225923	0.855048	0.265644	-0.850473	0.395062	0.788692
B0019.1	amx-2	213.158	228.092	266.805	506.746	506.453	433.63	141.068	116.793	163.376	273.18	188.494	127.553	209.393	270.412	279.544	213.577	286.209	314.658	643.495	503.873	558.141	360.67	271.933	395.04		311.346	1.03024	2.04237	0.216999	4.7477	2.05745e-06	1.42508e-05		311.346	0.470442	1.38553	0.229492	2.04992	0.0403718	0.0620336		311.346	0.100631	1.07224	0.220439	0.456501	0.64803	0.906788
B0024.10	asps-1	916.93	860.677	510.477	484.415	540.098	492.96	493.738	467.174	568.472	2000.01	976.939	976.06	472.574	396.208	496.533	405.702	424.166	377.199	584.253	779.022	740.568	664.617	783.077	680.347		670.509	-0.592044	0.663402	0.234059	-2.52946	0.0114237	0.0281207		670.509	1.36728	2.57983	0.23412	5.84007	5.21784e-09	7.45319e-08		670.509	-0.177862	0.884012	0.236674	-0.751504	0.452349	0.822428
B0024.11	B0024.11	1101.9	1179.02	812.753	656.194	675.566	656.116	621.461	602.156	668.791	1571.2	876.768	968.295	782.821	855.81	708.634	739.591	821.563	906.842	634.302	895.649	737.311	734.182	899.298	753.502		827.489	-0.637844	0.642673	0.191471	-3.33128	0.000864464	0.00302623		827.489	0.848776	1.80097	0.192418	4.41111	1.02844e-05	5.34414e-05		827.489	0.0722898	1.05138	0.192055	0.376401	0.706619	0.926098
B0024.12	gna-1	963.613	694.941	351.628	225.03	239.06	235.574	38.1265	35.4209	29.6179	34.7683	29.082	31.0564	155.604	144.616	135.862	208.913	185.315	195.44	77.628	101.907	89.0419	80.2677	103.809	76.2908		185.942	-1.52176	0.348262	0.242129	-6.2849	3.28066e-10	5.49203e-09		185.942	-0.130528	0.913497	0.319625	-0.408377	0.682997	0.735274		185.942	0.435532	1.35241	0.251582	1.73117	0.0834212	0.457972
B0024.15	B0024.15	21.1396	17.2299	18.5067	12.0245	10.6249	6.10747	17.1569	14.3598	13.3758	3.31127	8.61689	9.98243	42.2627	30.7061	31.2776	27.9795	23.6791	32.2476	36.7711	15.8522	44.521	19.2643	24.8238	22.9918		21.0339	-0.980894	0.506666	0.396362	-2.47474	0.0133333	0.0319907		21.0339	-0.95706	0.515106	0.468942	-2.04089	0.0412617	0.0632379		21.0339	-0.312449	0.805274	0.327998	-0.952595	0.340796	0.751015
B0024.8	che-12	254.556	242.86	360.881	317.79	308.122	285.306	303.105	305.386	300	104.305	188.494	175.247	387.088	401.161	393.903	270.468	288.268	305.864	131.763	84.9225	90.1278	125.218	91.3967	119.139		243.14	0.0850617	1.06073	0.188563	0.451106	0.651913	0.749202		243.14	-0.93907	0.521569	0.198293	-4.73577	2.18225e-06	1.40978e-05		243.14	-0.451462	0.731301	0.188798	-2.39125	0.0167913	0.22662
B0024.9	trx-2	1173.25	891.855	333.892	203.557	207.185	185.841	40.0328	40.2076	57.3249	54.636	43.0844	45.4755	339.062	291.213	292.251	408.5	315.036	379.154	367.711	345.351	396.345	351.038	434.416	389.815		316.093	-2.00699	0.248792	0.273788	-7.33045	2.29379e-13	7.41893e-12		316.093	0.0476984	1.03361	0.322702	0.14781	0.882493	0.90504		316.093	0.257597	1.19549	0.274322	0.939033	0.347714	0.757858
B0025.1	vps-34	1483.3	1789.45	1940.89	1594.96	1598.16	1623.71	1703.3	1808.38	1752.23	2726.83	1835.4	2104.07	4586.47	4509.84	4191.2	5721.8	4893.35	4525.41	1154.21	1609	1633.16	1993.85	2035.55	1887.41		2529.25	-0.114443	0.923739	0.153977	-0.743245	0.457334	0.572071		2529.25	0.339121	1.26499	0.154209	2.1991	0.027871	0.0449117		2529.25	0.188389	1.13949	0.152613	1.23442	0.217046	0.649486
B0034.1	B0034.1	95.1282	100.098	144.969	137.423	129.269	99.4644	30.5012	26.805	27.707	16.5564	45.2386	19.9649	27.855	22.782	43.0068	47.5651	32.9449	46.9056	81.7137	47.5566	55.3797	180.87	84.6265	215.286		73.3174	0.104757	1.07531	0.314598	0.332986	0.739145	0.816649		73.3174	-0.0215526	0.985172	0.379015	-0.0568648	0.954653	0.963864		73.3174	0.446219	1.36246	0.35587	1.25388	0.209884	0.643391
B0034.3	casy-1	2455.72	2959.45	4164.01	5068.32	4846.72	4905.17	6950.45	7539.87	6719.43	3309.62	5698.99	4944.63	5226.17	5651.91	5433.51	4084.07	4243.71	4437.47	4885.46	3546.36	3903.73	4025.16	3063.48	4014.15		4669.9	0.629428	1.54695	0.190653	3.30143	0.000961933	0.00331749		4669.9	-0.603481	0.658164	0.190609	-3.16607	0.00154514	0.00376715		4669.9	-0.353679	0.782586	0.190608	-1.85553	0.0635206	0.404517
B0034.5	B0034.5	10.5698	12.3071	10.7956	13.7423	9.73948	12.2149	1.90632	3.82929	1.91083	4.96691	3.23133	4.43663	4.80258	3.96208	4.88713	7.46119	5.14764	4.886	11.2356	18.1168	6.51526	13.9131	10.1552	14.6311		8.14017	0.085059	1.06073	0.441052	0.192855	0.847073	0.897052		8.14017	0.695289	1.61921	0.749396	0.927799	0.353512	NA		8.14017	0.363442	1.28649	0.597893	0.607872	0.543273	0.864295
B0035.1	znf-207	6038	5392.15	4214.91	4578.75	4893.64	4742.01	4318.77	4290.72	4347.14	10776.5	5646.21	5949.53	2032.45	2367.34	2348.76	1996.8	2563.52	2398.05	4563.71	7258.04	6400.16	6820.62	8057.57	6752.26		4947.82	-0.138299	0.90859	0.20789	-0.665251	0.50589	0.617342		4947.82	0.787501	1.72608	0.207975	3.78652	0.000152772	0.00053143		4947.82	0.044111	1.03105	0.208746	0.211314	0.832642	0.966843
B0035.12	sart-3	981.23	1057.59	830.489	796.193	772.075	808.803	969.365	980.299	986.944	3071.2	1504.72	1369.81	713.664	792.416	672.469	604.357	654.78	709.447	945.836	1182.12	1242.24	1539	1666.58	1387.87		1093.31	-0.271385	0.828524	0.211905	-1.28069	0.200303	0.298499		1093.31	1.01537	2.02143	0.211348	4.80427	1.5532e-06	1.0391e-05		1093.31	-0.146256	0.903592	0.213333	-0.685576	0.49298	0.845443
B0035.15	B0035.15	1017.34	754.015	608.408	381.348	359.475	393.495	267.838	275.709	290.446	410.598	258.507	340.512	255.497	186.218	235.56	291.919	250.175	256.026	345.24	349.881	301.874	336.054	399.437	330.245		370.659	-1.06821	0.476911	0.18163	-5.88123	4.07232e-09	5.18733e-08		370.659	0.268749	1.20476	0.188914	1.4226	0.154851	0.203049		370.659	0.237024	1.17856	0.190317	1.24542	0.212978	0.646603
B0035.4	pfd-4	2299.81	2007.7	793.476	419.139	395.777	417.925	230.665	204.867	201.593	307.948	216.499	204.085	1134.37	990.521	1062.46	1820.53	1056.3	1235.18	1014.27	1263.65	1191.21	1189.03	1387.88	1128.69		923.898	-2.0485	0.241736	0.262877	-7.7926	6.56429e-15	2.88945e-13		923.898	0.187934	1.13913	0.272164	0.690516	0.48987	0.553116		923.898	0.367655	1.29025	0.261589	1.40547	0.159881	0.585111
B0035.5	gspd-1	799.781	808.166	531.297	596.071	594.108	581.082	330.747	363.783	374.523	1024.84	568.714	583.417	638.743	731.004	651.943	599.693	619.776	658.633	480.068	575.208	545.11	549.031	613.824	612.417		601.333	-0.271793	0.828289	0.188261	-1.4437	0.148823	0.236004		601.333	1.0201	2.02806	0.191575	5.3248	1.01062e-07	9.70545e-07		601.333	-0.106272	0.928985	0.188961	-0.562403	0.573841	0.877514
B0041.2	ain-2	4521.23	5374.1	6306.16	6966.47	7687.1	7385.67	4139.58	4037.99	4375.8	6200.35	4117.79	5032.25	6495.01	6738.51	6326.88	5826.26	6990.49	6537.47	7435.94	9546.42	9800.04	9783.03	11396.4	9497.68		6771.61	0.443848	1.36023	0.153072	2.8996	0.0037364	0.0108279		6771.61	0.289528	1.22224	0.153541	1.88567	0.0593391	0.0871997		6771.61	-0.0153239	0.989435	0.153141	-0.100064	0.920293	0.986335
B0041.3	lmd-2	992.68	717.094	562.142	363.311	384.267	352.488	391.749	469.088	428.026	306.293	314.516	291.709	429.351	397.199	286.386	442.076	404.604	423.128	550.546	620.5	752.513	582.209	642.033	508.954		483.869	-1.04553	0.484468	0.185255	-5.64372	1.66413e-08	1.84131e-07		483.869	-0.498308	0.707936	0.19068	-2.61333	0.00896649	0.0168019		483.869	0.190345	1.14104	0.188002	1.01246	0.311317	0.727497
B0041.4	rpl-4	16113.7	16284.8	15373.7	23776.7	26247	25264	38293.3	41299.9	39026.8	31568	33410.9	32772.3	23921.7	26314.2	25133.5	22074.9	25193.6	28718.9	39565.8	33886.3	37367.2	29869.2	31826.3	30469.3		28907.2	0.656252	1.57598	0.0986397	6.65302	2.87131e-11	5.9831e-10		28907.2	-0.279122	0.824092	0.0985586	-2.83204	0.00462516	0.0094853		28907.2	0.0117708	1.00819	0.0986082	0.119369	0.904983	0.983007
B0041.5	B0041.5	1442.78	1195.43	1011.7	745.518	755.252	731.151	933.145	876.908	928.664	2101	1224.67	1166.83	602.244	629.971	571.794	726.534	610.51	631.271	1097.01	1162.87	1120.63	996.39	1114.81	972.969		972.919	-0.70923	0.611647	0.176277	-4.02339	5.73674e-05	0.000272688		972.919	0.710775	1.63668	0.17638	4.0298	5.58241e-05	0.000226627		972.919	0.126044	1.0913	0.178751	0.705135	0.480726	0.838008
B0041.6	ptps-1	484.449	351.163	202.803	121.104	124.842	124.767	69.5808	68.9272	42.9937	38.0796	46.3158	55.4579	88.3675	68.3459	41.0519	121.244	48.3878	80.1304	37.7926	16.9845	31.4904	41.7392	47.3909	33.4426		99.4521	-1.48516	0.35721	0.319215	-4.65252	3.27896e-06	2.16627e-05		99.4521	-0.36592	0.775974	0.353563	-1.03495	0.300692	0.362913		99.4521	0.339329	1.26517	0.33729	1.00605	0.314393	0.729673
B0041.7	xnp-1	4455.17	4974.53	3977.4	4138.14	4963.59	4824.9	4880.19	4508.03	4502.87	9594.41	5364.01	6520.74	4587.43	4319.66	4114.97	3466.66	3648.65	3072.32	3477.94	4935.69	5268.68	4865.3	5219.76	4665.24		4764.43	0.0548627	1.03876	0.179143	0.306251	0.759413	0.832532		4764.43	0.628214	1.54565	0.179168	3.50629	0.000454403	0.0013339		4764.43	-0.354162	0.782324	0.179416	-1.97398	0.0483845	0.3579
B0041.8	B0041.8	4642.78	3456.65	1893.08	966.254	865.043	903.032	842.595	735.224	931.53	2158.95	1169.74	1286.62	1001.82	883.544	1025.32	1791.62	1371.33	1369.06	668.009	1160.61	864.358	1064.89	1308.89	1012.68		1390.57	-1.86951	0.273666	0.25905	-7.21679	5.32308e-13	1.60969e-11		1390.57	0.877647	1.83738	0.26008	3.37453	0.000739417	0.00201262		1390.57	0.638861	1.5571	0.259652	2.46045	0.0138764	0.208063
B0198.1	tsp-20	398.129	412.698	412.546	546.255	548.952	538.33	783.499	824.255	733.759	395.697	619.339	679.914	527.324	466.535	457.436	509.226	457.11	502.281	535.224	377.056	510.362	392.777	475.037	390.86		520.608	0.417013	1.33516	0.16465	2.53272	0.0113182	0.0279309		520.608	-0.459258	0.72736	0.164328	-2.79477	0.00519361	0.0104796		520.608	0.0172801	1.01205	0.165483	0.104422	0.916835	0.984963
B0198.2	B0198.2	45.8025	68.9198	77.1113	77.3003	82.3429	83.7595	57.1897	39.2502	49.6816	33.1127	44.1615	41.0389	101.815	103.014	84.0587	96.0629	87.5099	90.8796	113.378	91.7162	92.2995	67.4249	64.3162	77.3359		73.7284	0.336831	1.26298	0.204649	1.6459	0.099785	0.170565		73.7284	-0.284842	0.820831	0.246579	-1.15518	0.248019	0.306697		73.7284	-0.0731508	0.95056	0.199964	-0.36582	0.714499	0.929782
B0205.4	B0205.4	288.908	283.063	265.263	177.791	180.623	197.184	238.29	289.111	225.478	107.616	180.955	205.194	523.481	539.834	501.42	558.657	504.469	475.897	271.698	187.962	215.004	190.502	247.109	250.819		296.097	-0.591264	0.663761	0.179938	-3.28594	0.00101643	0.00346846		296.097	-0.58913	0.664743	0.186993	-3.15055	0.00162965	0.00393108		296.097	-0.023675	0.983724	0.172292	-0.137412	0.890705	0.980426
B0205.6	nfs-1	953.924	922.212	751.064	685.396	659.628	732.896	416.532	409.734	403.185	627.486	466.389	470.283	528.284	513.09	479.916	563.32	563.152	529.643	305.405	386.114	326.849	362.81	470.524	414.897		539.281	-0.337854	0.791218	0.137242	-2.46174	0.0138264	0.0329874		539.281	0.340412	1.26612	0.143619	2.37025	0.0177761	0.0304071		539.281	0.122463	1.08859	0.140979	0.868656	0.385035	0.783083
B0205.7	kin-3	10745.1	10016.3	8639.55	13257.9	13379.4	13358.8	10691.6	10420.5	10469.4	26996.8	15255.1	16583	5711.23	5378.53	6020.95	5802.01	6930.78	6061.57	5448.26	7415.43	6809.54	7467.04	8234.73	7324.96		9934.1	0.44402	1.36039	0.169876	2.61379	0.00895429	0.0228165		9934.1	0.897341	1.86263	0.169889	5.28193	1.27828e-07	1.18785e-06		9934.1	0.135365	1.09837	0.170239	0.795151	0.426526	0.807196
B0205.8	B0205.8	2546.44	1885.45	1118.11	417.422	486.974	411.818	207.789	219.227	201.593	516.558	288.666	352.712	207.472	162.445	194.508	336.686	266.648	258.958	104.185	165.316	125.962	189.432	261.778	191.25		463.225	-2.07589	0.23719	0.244109	-8.50394	1.83257e-17	1.42005e-15		463.225	0.876016	1.8353	0.251728	3.48002	0.000501381	0.00144684		463.225	0.611627	1.52798	0.252713	2.42025	0.01551	0.218066
B0207.10	B0207.10	7.04653	9.02521	3.08445	1.71778	3.54163	0.872495	0.953161	0	0	0	1.07711	0	5.7631	2.97156	0.977426	10.2591	6.17717	5.8632	3.06426	1.1323	0	0	0	1.04508		2.69048	-1.64111	0.320609	0.865041	-1.89715	0.0578083	0.109368		2.69048	0.394006	1.31404	1.77107	0.222467	0.82395	NA		2.69048	1.19963	2.29681	0.813235	1.47514	0.140176	0.558275
B0207.12	avr-14	192.018	247.783	377.074	320.367	296.611	263.494	272.604	322.618	319.109	144.04	228.347	240.687	267.024	241.687	248.266	197.722	241.939	269.707	175.684	115.495	143.336	112.375	80.1131	116.004		226.421	0.106421	1.07655	0.224184	0.474704	0.634998	0.734871		226.421	-0.567111	0.674967	0.22927	-2.47355	0.0133779	0.0238545		226.421	-0.0942594	0.936753	0.227286	-0.414717	0.678349	0.917696
B0207.2	B0207.2	30.8286	29.537	20.8201	19.7545	17.7081	19.1949	19.0632	27.7624	19.1083	8.27818	9.694	11.0916	37.4601	36.6493	33.2325	29.8448	28.8268	42.9968	32.6855	24.9106	28.2328	25.6857	25.9521	35.5327		25.6188	-0.512489	0.701012	0.305548	-1.67727	0.0934888	0.16166		25.6188	-1.16014	0.447469	0.397273	-2.92026	0.00349735	0.00747938		25.6188	-0.0779242	0.94742	0.281257	-0.277057	0.781737	0.952307
B0207.3	gpa-14	23.782	22.1528	38.5557	34.3557	37.1871	33.1548	20.9696	16.2745	11.465	4.96691	11.8482	14.4191	35.5391	31.6967	45.939	51.2957	38.0925	52.7688	43.9211	23.7783	32.5763	35.3178	30.4656	29.2622		29.991	0.30191	1.23278	0.296594	1.01792	0.308715	0.422234		29.991	-0.568701	0.674224	0.412337	-1.37921	0.167829	0.217986		29.991	0.331165	1.25803	0.287598	1.15149	0.249532	0.677326
B0207.4	air-2	3251.09	2900.37	1970.97	2174.71	2184.3	2207.41	2421.98	2207.59	2293.95	6119.23	3312.12	3543.76	2983.36	2955.71	3023.18	3288.52	3519.96	3114.34	1480.04	2554.47	2219.53	2795.46	3354.6	2853.07		2863.74	-0.306666	0.808508	0.213556	-1.436	0.151003	0.238816		2863.74	0.905373	1.87303	0.213568	4.23928	2.24235e-05	0.000103672		2863.74	0.146871	1.10717	0.213426	0.688157	0.491354	0.844382
B0207.6	B0207.6	1050.81	786.014	445.703	316.931	314.32	322.823	337.419	310.173	315.287	836.096	465.312	541.269	187.301	133.72	171.05	181.867	180.167	183.714	134.828	218.534	184.599	266.489	284.345	213.196		349.249	-1.25782	0.418176	0.246284	-5.10717	3.27012e-07	2.72846e-06		349.249	0.932722	1.90887	0.248019	3.76068	0.000169451	0.000578188		349.249	0.1491	1.10888	0.256642	0.580965	0.561264	0.87383
B0207.7	B0207.7	0.880817	0.820473	2.31334	2.57668	0	0	0.953161	0.957323	0.955415	0	0	0	2.88155	1.98104	3.90971	2.79795	3.08858	2.9316	1.02142	2.2646	2.17175	3.21071	1.12835	2.09016		1.62228	-0.644989	0.639498	1.23813	-0.52094	0.602409	NA		1.62228	-2.04867	0.241706	1.58054	-1.29618	0.194912	NA		1.62228	0.00525979	1.00365	0.937807	0.00560861	0.995525	1
B0207.9	B0207.9	0	0	0	0	0	0	0	0	0.955415	3.31127	1.07711	2.21832	1.92103	0.990521	0	1.8653	0	0.9772	0	0	0	1.07024	0	1.04508		0.642978	0	1	2.12205	0	1	NA		0.642978	2.65144	6.28293	1.87702	1.41258	0.15778	NA		0.642978	-0.0173189	0.988067	1.76935	-0.00978831	0.99219	1
B0212.1	otpl-1	56.3723	62.356	108.727	61.8402	73.4888	80.2696	117.239	135.94	101.274	72.848	90.4773	94.2785	81.6439	95.09	96.7652	86.7364	109.13	97.72	266.591	192.491	213.918	183.01	110.579	147.356		114.006	-0.0832138	0.943953	0.241666	-0.344334	0.730595	0.81009		114.006	-0.450567	0.731755	0.241294	-1.86729	0.0618606	0.0905539		114.006	0.101205	1.07267	0.23844	0.424446	0.671241	0.915272
B0212.2	sre-5	1.76163	0.820473	0.771113	1.71778	1.77081	0.872495	0	0.957323	0.955415	0	2.15422	0	3.84207	13.8673	5.86456	11.1918	11.3248	3.9088	0	1.1323	0	0	0	1.04508		2.66492	0.400204	1.31969	1.14694	0.348931	0.727141	0.807893		2.66492	0.343389	1.26873	1.57427	0.218126	0.827331	NA		2.66492	0.167246	1.12291	0.738049	0.226605	0.820731	0.964159
B0212.5	osm-9	40.5176	49.2284	98.7025	79.877	88.5407	68.9271	119.145	109.135	128.981	44.7022	82.9375	77.6411	119.104	143.625	147.591	96.9955	91.628	116.287	56.1781	40.7628	62.9809	70.6356	24.8238	61.6597		84.192	0.327052	1.25445	0.303064	1.07915	0.28052	0.391443		84.192	-0.781406	0.581799	0.305598	-2.55697	0.0105588	0.019369		84.192	-0.427977	0.743303	0.294574	-1.45287	0.146261	0.565875
B0218.1	faah-1	355.85	287.986	353.17	300.612	262.966	256.514	115.333	114.879	121.338	236.756	175.569	151.955	201.708	194.142	226.763	235.96	232.673	250.163	152.192	82.6579	93.3854	120.937	80.1131	143.176		197.783	-0.281649	0.82265	0.200567	-1.40426	0.16024	0.250426		197.783	0.671789	1.59305	0.216027	3.10975	0.00187244	0.00442414		197.783	0.207274	1.1545	0.205895	1.0067	0.31408	0.729501
B0218.2	faah-2	169.998	164.915	175.814	180.367	170.884	212.016	301.199	284.325	310.51	1329.48	635.495	590.072	500.429	501.203	646.079	575.445	669.193	612.705	263.527	317.044	230.206	409.901	365.587	420.122		418.188	0.141184	1.10281	0.230493	0.61253	0.540187	0.649295		418.188	1.50665	2.8415	0.223184	6.75073	1.47104e-11	5.1451e-10		418.188	0.172622	1.12711	0.221084	0.780799	0.434921	0.812261
B0218.7	B0218.7	0	0	0.771113	0	0	0	1.90632	0	1.91083	6.62254	3.23133	5.54579	0.960516	0.990521	1.95485	0.932649	1.02953	8.7948	1.02142	0	0	0	0	2.09016		1.57343	-0.877887	0.544164	1.88602	-0.46547	0.641595	NA		1.57343	1.99224	3.97854	1.21478	1.64	0.101004	NA		1.57343	1.46245	2.75575	1.22132	1.19743	0.231137	0.662763
B0228.1	B0228.1	68.7037	36.1008	32.3868	36.0735	53.1244	56.7122	0	2.87197	1.91083	1.65564	1.07711	1.10916	1.92103	0.990521	2.93228	4.66325	1.02953	5.8632	14.2999	2.2646	6.51526	6.42142	7.89848	4.18032		14.6127	0.0924891	1.06621	0.404235	0.2288	0.819024	0.875894		14.6127	-0.365242	0.776339	1.11732	-0.326892	0.74375	0.786108		14.6127	0.997484	1.99652	0.812238	1.22807	0.219421	0.652587
B0228.4	cpna-2	1377.6	2106.16	4325.95	3633.97	3515.07	3951.53	5660.83	5853.07	5428.67	2124.18	4151.18	3672.42	4404.93	5115.05	4681.87	2944.37	3130.79	2777.2	1667.98	1111.92	1290.02	1513.31	1131.74	1592.7		3215.1	0.507094	1.42118	0.27832	1.82198	0.0684577	0.125094		3215.1	-0.767676	0.587363	0.278323	-2.75821	0.00581181	0.0115605		3215.1	-0.681948	0.623323	0.278302	-2.45039	0.0142703	0.210231
B0228.5	trx-1	70.4653	67.2788	60.1468	81.5948	63.7493	69.7996	7.62529	2.87197	4.77708	0	2.15422	4.43663	12.4867	5.94312	4.88713	7.46119	7.2067	9.772	117.463	89.4516	102.072	96.3213	129.761	103.463		46.7162	0.122834	1.08887	0.228057	0.53861	0.590156	0.693879		46.7162	-1.05352	0.481792	0.716897	-1.46955	0.141683	0.18792		46.7162	0.0631299	1.04473	0.452752	0.139436	0.889106	0.979902
B0228.7	B0228.7	1286.87	762.22	549.804	450.059	419.683	424.905	315.496	322.618	397.453	566.227	434.076	423.699	421.667	404.132	337.212	529.745	382.984	385.994	241.055	243.444	279.07	268.629	296.757	293.667		434.895	-1.00456	0.498423	0.221821	-4.52869	5.93509e-06	3.65638e-05		434.895	0.456568	1.37227	0.225681	2.02307	0.043066	0.0656371		434.895	0.159688	1.11705	0.22463	0.710895	0.477149	0.836733
B0238.10	natc-2	3266.95	2588.59	2281.72	2167.84	2256.02	2212.65	1857.71	1784.45	1882.17	2915.57	2037.89	1949.9	2153.48	2134.57	2323.34	1938.98	1783.14	1808.8	2943.73	2850	2784.19	2477.6	2542.18	2614.79		2314.84	-0.293877	0.815707	0.140957	-2.08487	0.0370813	0.0749791		2314.84	0.319355	1.24777	0.141882	2.25085	0.0243951	0.0400605		2314.84	-0.257363	0.836616	0.141635	-1.81708	0.0692041	0.421728
B0238.11	B0238.11	11796.8	8267.91	5465.65	4391.52	4408.44	4202.81	3729.72	3469.34	3899.05	8741.76	5228.3	5624.54	3618.27	3477.72	3212.8	4141.89	3998.69	3401.63	2935.56	3734.32	3935.22	3779.01	4939.93	4023.56		4767.68	-0.973326	0.509331	0.216552	-4.49465	6.96831e-06	4.18042e-05		4767.68	0.819725	1.76507	0.216802	3.78099	0.000156209	0.000540751		4767.68	0.163048	1.11965	0.216937	0.751592	0.452297	0.822428
B0238.12	B0238.12	21.1396	31.178	62.4602	43.8035	32.7601	28.7923	14.2974	15.3172	13.3758	9.93381	17.2338	25.5106	28.8155	27.7346	26.3905	123.11	78.2441	65.4724	17.3642	7.9261	22.8034	39.5988	29.3372	66.8851		35.3952	-0.130175	0.913721	0.378734	-0.343711	0.731064	0.810489		35.3952	0.331496	1.25832	0.453815	0.730466	0.465106	0.529675		35.3952	1.68704	3.21995	0.378788	4.45378	8.43718e-06	0.000831337
B0238.9	B0238.9	786.569	830.319	652.362	771.285	781.814	793.971	788.265	628.004	815.925	4158.96	1633.98	1668.17	820.281	839.961	1258.93	670.575	905.985	967.428	726.23	1321.39	822.009	910.771	1140.77	1009.55		1070.98	0.0487456	1.03437	0.28172	0.173029	0.862629	0.909839		1070.98	1.73963	3.3395	0.28122	6.18601	6.17061e-10	1.2213e-08		1070.98	-0.198586	0.871404	0.281663	-0.705047	0.480781	0.838008
B0240.2	spe-42	13.2122	9.02521	4.62668	19.7545	25.6768	20.0674	2.85948	1.91465	2.86625	4.96691	1.07711	6.65495	1574.29	1634.36	2125.9	1575.24	1981.84	1631.92	9.19279	6.7938	8.68702	11.7726	10.1552	4.18032		445.293	1.30889	2.47751	0.35705	3.66585	0.00024652	0.000991278		445.293	0.692755	1.61637	0.70947	0.976439	0.328847	0.391874		445.293	-0.0400226	0.97264	0.189034	-0.211721	0.832324	0.966843
B0244.2	ida-1	1210.24	1300.45	1889.23	2489.93	2402.99	2423.79	3457.12	3751.75	3378.35	1503.32	2911.43	2273.78	4476.97	5122.97	5138.33	3586.97	3758.81	3945.93	1242.05	835.637	861.101	1085.22	823.698	1166.31		2543.18	0.733461	1.66262	0.207694	3.53144	0.000413298	0.00156943		2543.18	-0.66127	0.632322	0.207569	-3.18579	0.0014436	0.0035494		2543.18	-0.384305	0.766148	0.206924	-1.85723	0.0632788	0.404462
B0250.1	rpl-2	15202	15113.9	13974.9	21865.7	25259.8	23998.9	21556.7	22479.9	21631.6	15071.2	17005.4	16570.8	15686.2	17429.2	15454.1	14333	16846.2	18247.3	38578	31874.2	37094.6	29942	31827.5	31419.3		22019.3	0.683347	1.60586	0.107618	6.34973	2.1569e-10	3.74013e-09		22019.3	-0.432685	0.740882	0.107715	-4.01695	5.89553e-05	0.000237182		22019.3	0.0252122	1.01763	0.107706	0.234084	0.81492	0.962617
B0250.2	calf-1	258.079	159.172	144.969	156.318	159.373	140.472	233.525	245.075	214.013	201.988	243.427	226.268	136.393	128.768	119.246	150.157	93.687	124.104	487.218	380.453	486.473	421.673	472.78	435.798		242.476	-0.298411	0.813148	0.196646	-1.51751	0.129139	0.21035		242.476	-0.0401502	0.972554	0.196031	-0.204816	0.837716	0.867587		242.476	-0.0604232	0.958983	0.206027	-0.293278	0.76931	0.946756
B0250.5	B0250.5	1582.83	1285.68	799.644	1103.68	1113.84	1125.52	1702.35	1628.41	1766.56	3756.64	2334.1	2359.18	403.417	369.464	416.384	475.651	460.199	399.675	1172.59	1305.54	1126.05	1302.48	1532.3	1286.49		1283.69	-0.133411	0.911673	0.19815	-0.673284	0.500766	0.613404		1283.69	0.728055	1.6564	0.197378	3.68864	0.000225457	0.000735904		1283.69	0.167336	1.12298	0.203685	0.821546	0.411335	0.798641
B0250.9	dhcr-7	106.579	116.507	161.934	131.41	128.384	110.807	505.176	525.57	477.708	298.014	364.063	366.022	243.971	268.431	316.686	257.411	333.567	292.183	464.746	372.526	374.628	315.72	257.265	274.856		294.34	-0.0587442	0.9601	0.180574	-0.325319	0.74494	0.821222		294.34	-0.548224	0.683861	0.164776	-3.3271	0.000877558	0.00233178		294.34	0.0902677	1.06457	0.16742	0.539169	0.58977	0.883433
B0252.1	B0252.1	37.8751	37.7418	60.1468	48.098	60.2077	58.4572	61.0023	62.226	60.1912	13.2451	34.4675	39.9297	50.9074	47.545	80.149	44.7672	41.1811	49.8372	69.4566	47.5566	55.3797	37.4583	36.1073	41.8032		48.989	0.290793	1.22331	0.263988	1.10154	0.270661	0.380389		48.989	-1.00773	0.497327	0.292638	-3.44361	0.000573998	0.00161807		48.989	-0.394641	0.760679	0.269445	-1.46464	0.143018	0.562077
B0252.2	asm-1	1027.03	953.39	580.648	459.507	465.724	473.765	264.979	281.453	251.274	326.16	294.051	320.547	199.787	213.952	221.876	196.789	190.463	213.03	154.235	192.491	188.943	201.204	191.82	236.188		337.471	-0.871571	0.546551	0.168226	-5.18096	2.2075e-07	1.92741e-06		337.471	0.236417	1.17806	0.177877	1.32911	0.183812	0.235915		337.471	-0.0822343	0.944594	0.181451	-0.453204	0.650402	0.907922
B0252.3	B0252.3	113.625	130.455	104.871	76.4414	71.718	87.2495	121.052	95.7323	123.249	137.418	135.716	141.972	210.353	245.649	231.65	185.597	153.4	186.645	89.885	115.495	81.4408	161.606	142.173	129.59		136.374	-0.566965	0.675035	0.178573	-3.17497	0.00149852	0.00488282		136.374	0.288149	1.22107	0.177276	1.62542	0.104072	0.143302		136.374	-0.386047	0.765223	0.161537	-2.38984	0.0168556	0.22662
B0252.4	cyn-10	3111.92	2194.77	1154.36	510.182	442.704	478.127	335.513	291.026	331.529	1394.05	665.654	667.713	391.891	415.028	434.955	692.958	562.122	527.688	574.038	904.707	752.513	831.574	1016.65	798.441		811.671	-2.1745	0.221519	0.277635	-7.83221	4.79386e-15	2.18782e-13		811.671	1.50649	2.84117	0.280358	5.37344	7.72498e-08	7.67663e-07		811.671	0.521768	1.43571	0.279869	1.86433	0.0622758	0.401092
B0252.5	B0252.5	4.40408	0.820473	1.54223	2.57668	3.54163	3.48998	0	0.957323	0	0	0	0	0	1.98104	3.90971	0	2.05906	5.8632	0	0	1.08588	0	1.12835	0		1.38998	0.520533	1.43448	1.15864	0.449261	0.653243	NA		1.38998	-0.56778	0.674654	1.9164	-0.296275	0.76702	NA		1.38998	0.425017	1.34259	1.2254	0.346839	0.728712	0.932805
B0252.8	B0252.8	16.7355	18.0504	8.48225	19.7545	11.5103	13.9599	24.7822	28.7197	36.3058	18.212	21.5422	16.6374	148.88	120.844	130.975	161.348	109.13	124.104	45.9639	22.646	30.4046	18.194	18.0537	22.9918		49.5095	0.0776677	1.05531	0.35533	0.218579	0.826978	0.882371		49.5095	-0.666004	0.63025	0.338094	-1.96988	0.048852	0.0733909		49.5095	-0.0207706	0.985706	0.237779	-0.0873527	0.930391	0.991097
B0261.7	B0261.7	3541.76	2661.62	1588.49	1466.13	1435.24	1449.21	326.934	237.416	370.701	966.891	479.314	480.266	231.484	199.095	305.934	241.556	259.441	284.365	121.549	209.475	133.563	162.676	232.441	171.393		731.54	-0.840621	0.558403	0.278189	-3.02177	0.00251304	0.00766481		731.54	1.03911	2.05497	0.283307	3.6678	0.000244643	0.000788442		731.54	0.0925039	1.06622	0.286542	0.322828	0.746825	0.939351
B0272.2	memb-1	1166.2	794.218	550.575	592.636	568.431	547.927	539.489	605.985	647.771	903.977	668.886	638.875	268.945	247.63	239.469	302.178	252.234	257.004	173.642	211.74	207.403	194.783	232.441	182.889		458.139	-0.554291	0.680992	0.201687	-2.74827	0.00599102	0.0162713		458.139	0.299859	1.23102	0.203089	1.47649	0.139813	0.185957		458.139	0.102382	1.07354	0.210074	0.487361	0.626003	0.896467
B0272.3	B0272.3	2197.64	2198.87	1785.13	2092.26	2156.85	2100.1	3256.95	3286.49	3340.13	3693.72	3259.34	3318.6	5459.58	5554.84	4856.83	5588.43	6651.78	6756.36	2633.22	3781.88	3852.69	3897.8	4885.77	3656.73		3760.92	0.0387397	1.02722	0.148107	0.261567	0.793656	0.857766		3760.92	0.0551691	1.03898	0.147759	0.373373	0.708871	0.757649		3760.92	0.259286	1.19689	0.146995	1.76391	0.0777467	0.443174
B0272.4	B0272.4	587.505	372.495	336.205	588.341	572.858	597.659	203.023	202.952	162.421	187.087	201.42	195.212	421.667	383.331	327.438	463.527	341.803	344.952	248.205	226.46	181.341	310.369	310.297	269.631		334.842	0.441779	1.35828	0.187555	2.35546	0.0184996	0.0420081		334.842	0.0401292	1.02821	0.202084	0.198577	0.842594	0.87188		334.842	0.0231888	1.0162	0.190751	0.121566	0.903243	0.983007
B0273.4	unc-5	1202.31	1624.54	1816.74	1903.3	1921.33	1775.53	3259.81	3568.9	2987.58	2122.52	2141.3	2815.04	1459.02	1429.32	1409.45	1456.8	1721.37	1752.12	2661.82	2493.32	2806.99	2417.66	2323.28	2498.79		2148.7	0.26977	1.20562	0.1442	1.8708	0.0613729	0.114396		2148.7	-0.47096	0.721485	0.143801	-3.27509	0.0010563	0.0027365		2148.7	0.197922	1.14704	0.144868	1.36622	0.171869	0.600021
B0280.1	ggtb-1	1509.72	1110.1	779.596	508.464	522.39	511.282	416.532	480.576	455.733	1125.83	618.262	632.22	54.7494	70.327	47.8939	74.6119	63.8307	66.4496	451.468	559.356	477.786	515.854	576.589	445.204		503.118	-1.13994	0.453777	0.224124	-5.08621	3.65288e-07	3.01261e-06		503.118	0.808816	1.75177	0.226146	3.57652	0.000348202	0.00106731		503.118	0.246016	1.18593	0.26503	0.928257	0.353274	0.762529
B0280.12	glr-2	74.8694	96.8159	124.149	95.337	77.0304	95.102	146.787	127.324	138.535	61.2585	112.02	117.571	47.0653	63.3933	63.5327	53.161	65.8898	71.3356	79.6708	62.2765	67.3244	71.7059	53.0326	75.2457		85.018	-0.148663	0.902086	0.227387	-0.653791	0.513247	0.624373		85.018	-0.481519	0.716223	0.229912	-2.09436	0.0362275	0.0563565		85.018	0.129107	1.09362	0.248072	0.52044	0.602757	0.888891
B0280.13	viro-2	128.599	114.046	183.525	175.214	185.935	177.989	182.054	204.867	182.484	104.305	141.102	133.099	422.627	461.583	430.068	443.941	528.148	510.099	315.619	332.896	335.536	372.442	331.736	310.389		279.513	0.335596	1.2619	0.162404	2.06642	0.0387888	0.0778391		279.513	-0.57441	0.671561	0.171287	-3.35349	0.000797981	0.00214668		279.513	0.173042	1.12743	0.148047	1.16883	0.242472	0.672475
B0280.3	rpia-1	1560.81	1202.81	748.751	1263.43	1278.53	1281.7	283.089	293.898	295.223	408.942	256.352	306.128	13.4472	13.8673	16.6162	25.1815	19.561	19.544	226.755	310.25	190.028	292.175	348.661	284.262		455.834	0.122941	1.08895	0.222316	0.553003	0.580262	0.684626		455.834	0.149731	1.10936	0.231265	0.647441	0.517346	0.578925		455.834	0.552976	1.46711	0.355428	1.5558	0.119756	0.528846
B0280.7	B0280.7	95.1282	91.0726	84.0513	76.4414	62.8639	79.3971	76.2529	69.8846	63.0574	28.1458	53.8555	47.6938	57.631	63.3933	53.7585	64.3528	39.1221	34.202	60.2638	26.0429	33.6622	31.0369	39.4924	27.1721		56.5823	-0.304182	0.809901	0.251008	-1.21184	0.225573	0.329156		56.5823	-0.658269	0.633638	0.278575	-2.36299	0.0181282	0.0309132		56.5823	-0.339262	0.790445	0.273384	-1.24097	0.214616	0.648849
B0280.8	nhr-10	1054.34	996.055	912.998	827.113	790.669	816.655	1086.6	1176.55	1079.62	1602.66	1206.36	1276.64	980.687	1080.66	1123.06	908.4	996.583	943.975	414.697	374.791	448.467	434.516	447.956	383.544		890.15	-0.283253	0.821736	0.119554	-2.36925	0.0178241	0.0407729		890.15	0.286122	1.21936	0.119226	2.39983	0.0164027	0.028329		890.15	-0.160744	0.894564	0.119676	-1.34315	0.179222	0.609537
B0285.1	cdk-12	1200.55	1835.4	2600.19	2751.89	2918.3	2960.38	3484.76	3359.25	3530.26	9851.03	4755.44	5361.67	2915.17	2883.41	3391.67	2620.74	3179.18	2895.44	2712.89	4127.23	3403.14	3669.84	4107.21	3664.05		3507.46	0.614492	1.53102	0.239885	2.56162	0.0104186	0.0259385		3507.46	0.944216	1.92414	0.239489	3.94262	8.0596e-05	0.000309574		3507.46	-0.0798925	0.946128	0.239762	-0.333217	0.738971	0.936099
B0285.4	lcmt-1	1922.82	1487.52	849.767	584.047	525.932	529.605	610.023	563.863	541.72	1882.46	998.482	898.418	724.229	695.345	824.948	985.81	947.166	882.412	803.858	1224.02	909.965	1053.11	1152.05	946.842		939.35	-1.37722	0.38496	0.249936	-5.5103	3.58231e-08	3.7271e-07		939.35	1.13707	2.19934	0.250644	4.53659	5.71715e-06	3.23685e-05		939.35	0.32694	1.25435	0.250175	1.30685	0.191265	0.619947
B0285.5	hse-5	2220.54	2209.54	1766.62	1856.92	1851.39	1799.96	1770.02	1759.56	1749.37	5400.68	2924.36	3022.46	1385.06	1391.68	1607.87	1425.09	1541.2	1307.49	903.957	1225.15	1099.99	1021.01	1222.01	1088.97		1814.62	-0.169789	0.888973	0.184805	-0.918746	0.358229	0.475527		1814.62	1.1028	2.14771	0.184819	5.96693	2.41755e-09	3.88166e-08		1814.62	-0.0369894	0.974687	0.185707	-0.199182	0.842121	0.967705
B0285.7	mnp-1	3671.24	4990.94	6205.92	7945.61	7898.72	7736.41	6487.22	7274.7	6398.42	4554.65	5043.03	5352.8	9192.14	9890.35	7589.72	8184	8953.8	8143.01	2561.72	3040.22	3373.82	3441.88	3660.38	3366.2		6039.87	0.665235	1.58583	0.156495	4.25085	2.12965e-05	0.000113017		6039.87	-0.431069	0.741712	0.156764	-2.74979	0.00596327	0.0118223		6039.87	-0.0773064	0.947826	0.156381	-0.494346	0.621062	0.896322
B0286.1	B0286.1	701.13	613.714	660.073	450.059	461.297	454.57	493.738	525.57	487.262	183.776	304.822	329.42	558.06	482.383	488.713	560.522	530.207	491.532	443.297	394.04	456.068	321.071	468.267	400.266		469.161	-0.531778	0.691702	0.159985	-3.32392	0.000887618	0.0031		469.161	-0.866821	0.548354	0.167077	-5.18814	2.12409e-07	1.81105e-06		469.161	0.0492586	1.03473	0.161291	0.305402	0.76006	0.943484
B0286.2	lat-2	138.288	169.018	306.903	395.09	388.694	397.858	230.665	244.117	191.083	140.729	178.8	163.046	426.469	448.706	503.375	492.439	534.325	560.913	339.112	224.195	235.635	372.442	251.623	346.966		320.021	0.941243	1.92018	0.225692	4.17048	3.03961e-05	0.000155193		320.021	-0.459447	0.727265	0.234649	-1.95802	0.0502282	0.0750953		320.021	0.2037	1.15165	0.222198	0.916749	0.359274	0.766755
B0286.3	paic-1	174.402	168.197	205.887	127.975	123.072	121.277	36.2201	52.6528	32.4841	19.8676	31.2362	48.803	220.919	235.744	273.679	420.625	388.132	394.789	59.2424	107.568	110.759	131.639	155.713	98.2375		155.797	-0.559554	0.678512	0.219174	-2.55301	0.0106797	0.0264908		155.797	-0.238707	0.847505	0.285939	-0.834816	0.403821	0.470226		155.797	0.720864	1.64817	0.210981	3.41673	0.000633783	0.0276351
B0286.4	ntl-2	5454.02	5771.21	5461.8	5051.14	5388.59	5061.34	4914.5	5304.53	5027.39	6208.63	4514.17	5285.14	7373.88	8138.12	7850.69	7939.64	8816.88	8830.96	6834.33	8981.4	8633.81	7949.72	9669.99	8127.58		6774.56	-0.106367	0.928924	0.127179	-0.836356	0.402955	0.519962		6774.56	0.0695961	1.04942	0.127481	0.545932	0.585113	0.643967		6774.56	0.131216	1.09522	0.12697	1.03344	0.301396	0.722288
B0286.6	try-9	7.92735	11.4866	6.16891	12.0245	14.1665	8.72495	5.71897	2.87197	3.82166	11.5894	11.8482	16.6374	5.7631	12.8768	2.93228	9.32649	9.26575	1.9544	7.14995	5.6615	6.51526	5.35118	9.02683	9.40572		8.25899	0.451147	1.36713	0.495483	0.91052	0.362549	0.479552		8.25899	1.70235	3.2543	0.592574	2.8728	0.00406855	NA		8.25899	-0.066627	0.954868	0.565704	-0.117777	0.906244	0.983007
B0302.5	B0302.5	299.478	263.372	319.241	415.704	477.234	431.013	594.773	612.687	630.574	241.723	426.536	358.258	391.891	399.18	366.535	391.713	392.25	434.854	896.807	548.033	699.305	478.396	475.037	521.495		461.087	0.585534	1.50059	0.176419	3.31899	0.000903426	0.00315077		461.087	-0.830753	0.562236	0.17735	-4.68427	2.80961e-06	1.75019e-05		461.087	0.0743583	1.05289	0.176739	0.420723	0.673957	0.916486
B0303.11	B0303.11	136.527	150.967	233.647	296.318	315.205	291.413	331.7	349.423	272.293	183.776	213.268	199.649	586.876	549.739	483.826	528.812	551.827	489.577	76.6066	71.3349	65.1526	86.6892	76.7281	84.6515		276.084	0.78916	1.72807	0.17193	4.59	4.43254e-06	2.82793e-05		276.084	-0.671851	0.627701	0.175381	-3.83082	0.000127719	0.000456962		276.084	-0.0455918	0.968892	0.163771	-0.278388	0.780714	0.952307
B0303.15	mrpl-11	2277.79	1576.95	1075.7	861.469	864.157	840.213	661.494	653.852	658.281	846.03	570.869	611.146	414.943	403.142	368.49	456.998	422.106	414.333	358.519	296.662	300.788	277.191	349.79	315.614		661.522	-0.94186	0.520561	0.196558	-4.79175	1.65329e-06	1.1702e-05		661.522	0.0357637	1.0251	0.199752	0.17904	0.857906	0.885416		661.522	0.124527	1.09015	0.202159	0.615986	0.537904	0.86135
B0303.16	B0303.16	4.40408	0.820473	1.54223	3.43557	1.77081	3.48998	10.4848	13.4025	15.2866	9.93381	8.61689	4.43663	1.92103	1.98104	2.93228	3.7306	4.11811	0	17.3642	12.4553	6.51526	8.56189	4.51341	13.586		6.47098	0.39677	1.31656	0.794692	0.499275	0.617586	0.718184		6.47098	-0.80105	0.573931	0.575499	-1.39192	0.163946	NA		6.47098	0.196585	1.14598	0.849765	0.231341	0.81705	0.963319
B0303.2	anmt-1	733.72	557.101	487.344	404.538	430.308	449.335	216.368	191.465	224.523	122.517	160.489	125.335	1153.58	1077.69	926.6	1977.22	1380.6	1730.62	224.713	170.977	195.458	173.378	169.253	217.377		562.521	-0.468721	0.722605	0.175263	-2.67439	0.0074865	0.0196722		562.521	-0.624119	0.648816	0.194667	-3.20609	0.00134552	0.0033381		562.521	0.688475	1.61158	0.171413	4.01648	5.9075e-05	0.00396639
B0303.3	B0303.3	3994.5	4053.96	3409.86	3925.14	4006.47	4060.59	3846.01	3897.26	4033.76	11225.2	6449.74	6272.29	4750.71	4940.72	5148.1	3869.56	4667.88	4768.74	1449.4	1902.26	1578.87	1771.24	2078.43	1788.13		4078.7	0.0657439	1.04662	0.175614	0.374366	0.708132	0.793462		4078.7	1.02326	2.03251	0.175554	5.82876	5.58398e-09	7.90051e-08		4078.7	-0.157388	0.896647	0.175583	-0.896375	0.370053	0.773552
B0303.4	B0303.4	1729.92	1807.5	1833.71	1999.5	1989.51	1984.93	797.796	796.493	791.084	647.353	623.647	710.971	846.215	852.838	736.002	665.911	736.113	677.2	271.698	327.235	281.242	341.405	350.918	384.589		924.324	0.153325	1.11213	0.094959	1.61464	0.106389	0.179991		924.324	-0.26649	0.83134	0.102753	-2.5935	0.00950055	0.0176729		924.324	-0.228378	0.853594	0.101041	-2.26026	0.0238053	0.269167
B0303.7	B0303.7	728.435	729.401	731.787	713.739	823.429	714.574	596.679	589.711	548.408	1447.03	802.447	771.974	256.458	296.166	303.98	255.546	289.297	300	366.69	437.068	377.885	474.115	479.55	443.114		561.562	0.040298	1.02833	0.178219	0.226115	0.821112	0.877622		561.562	0.795399	1.73556	0.179449	4.43246	9.31636e-06	4.91258e-05		561.562	-0.0201717	0.986115	0.186972	-0.107887	0.914086	0.98441
B0303.9	vps-33.1	364.658	362.649	271.432	254.232	284.216	251.279	564.272	538.015	538.854	1425.5	805.679	744.245	281.431	326.872	378.264	221.97	290.327	290.228	367.711	451.787	489.731	447.359	555.15	468.196		457.253	-0.338157	0.791051	0.210517	-1.60631	0.108205	0.182484		457.253	0.854487	1.80812	0.205934	4.14933	3.33456e-05	0.000146138		457.253	-0.298425	0.81314	0.211901	-1.40832	0.159035	0.583463
B0304.2	B0304.2	1680.6	962.415	528.984	525.642	476.349	463.295	448.939	305.386	454.778	3798.03	1584.43	1391.99	567.665	498.232	783.896	708.813	759.792	728.014	11.2356	44.1597	19.5458	55.6523	60.9311	48.0737		704.452	-1.11399	0.462014	0.427425	-2.60628	0.00915312	0.0232389		704.452	2.48554	5.60042	0.427727	5.81104	6.20872e-09	8.66432e-08		704.452	0.247897	1.18747	0.427714	0.579586	0.562194	0.873863
B0304.3	cyp-23A1	206.992	182.966	188.923	215.582	201.873	245.171	309.777	317.831	278.981	172.186	242.35	249.561	1263.08	1312.44	1055.62	1320.63	1412.51	1380.78	202.241	159.654	158.538	174.449	148.943	170.348		482.143	0.195822	1.14538	0.152571	1.28348	0.199324	0.297388		482.143	-0.435205	0.739588	0.153927	-2.82735	0.00469349	0.00960613		482.143	0.180021	1.1329	0.136496	1.31887	0.187212	0.614532
B0304.8	sra-35	9.68898	4.10237	2.31334	1.71778	4.42704	2.61749	1.90632	2.87197	0	1.65564	5.38555	1.10916	0.960516	0	1.95485	0.932649	3.08858	1.9544	0	0	0	0	0	0		1.94528	-0.868304	0.547791	0.924699	-0.939013	0.347724	NA		1.94528	0.817169	1.76195	1.12524	0.726219	0.467705	NA		1.94528	1.0164	2.02287	1.25664	0.808823	0.418617	0.801425
B0310.1	B0310.1	217.562	198.555	323.868	231.042	242.602	228.594	164.897	187.635	184.395	74.5036	110.942	75.4228	96.0516	107.967	102.63	117.514	85.4508	115.31	222.67	168.713	201.973	132.709	118.477	150.491		160.832	-0.0772991	0.94783	0.189661	-0.407566	0.683593	0.773657		160.832	-1.02905	0.490031	0.211525	-4.86493	1.14497e-06	7.95797e-06		160.832	0.0560776	1.03964	0.209983	0.267058	0.789424	0.952636
B0334.1	ttr-18	216.681	211.682	181.983	482.697	392.235	373.428	54.3302	58.3967	33.4395	39.7353	109.865	73.2045	176.735	159.474	242.402	404.77	299.593	308.795	93.9707	78.1287	62.9809	205.485	168.125	222.602		193.781	1.03294	2.0462	0.236769	4.36266	1.28489e-05	7.14909e-05		193.781	0.638154	1.55634	0.277426	2.30027	0.0214332	0.0357387		193.781	0.808667	1.75159	0.239412	3.37773	0.000730881	0.0301369
B0334.11	ooc-3	1345.89	1188.87	715.593	795.334	732.232	812.293	919.801	816.596	981.211	4463.59	2068.05	1882.24	44.1838	32.6872	41.0519	30.7774	44.2697	47.8828	185.899	357.807	212.832	390.636	444.571	382.499		789.033	-0.473915	0.720008	0.280805	-1.6877	0.0914689	0.158832		789.033	1.62942	3.09389	0.28035	5.81209	6.16977e-09	8.6268e-08		789.033	0.0570718	1.04035	0.33373	0.171012	0.864215	0.973685
B0334.15	emc-5	2345.61	1801.76	1751.97	1899.87	1982.43	2066.07	1008.44	987.957	942.995	1912.26	1185.9	1091.41	578.231	551.72	540.517	463.527	628.012	561.89	1489.23	2024.55	2004.53	1885.76	2248.81	1825.75		1407.47	0.0121021	1.00842	0.184841	0.0654729	0.947797	0.967833		1407.47	0.508454	1.42253	0.18677	2.72235	0.00648189	0.0127129		1407.47	-0.0153001	0.989451	0.18979	-0.0806163	0.935747	0.992417
B0334.4	B0334.4	5191.53	3587.11	2240.08	3234.59	2837.73	3016.22	417.485	454.728	475.797	1006.63	582.717	530.178	151.762	169.379	145.637	182.799	148.252	139.74	947.878	1289.69	1165.15	1274.65	1434.14	1177.8		1325.07	-0.277689	0.824911	0.237776	-1.16786	0.242863	0.349382		1325.07	0.649095	1.56818	0.242725	2.6742	0.0074908	0.0143876		1325.07	0.0131295	1.00914	0.254683	0.0515525	0.958885	0.998861
B0334.5	B0334.5	1618.94	1506.39	1461.26	1575.21	1602.59	1597.54	1653.74	1681.06	1687.26	2927.16	1912.95	1826.78	45.1443	46.5545	38.1196	48.4978	43.2402	49.8372	1269.63	1669.01	1609.27	1374.18	1541.33	1376.37		1256.75	0.0582769	1.04122	0.157368	0.370323	0.711142	0.795397		1256.75	0.406591	1.32555	0.1575	2.58153	0.00983626	0.0181884		1256.75	0.126623	1.09173	0.232459	0.544709	0.585954	0.883011
B0334.6	B0334.6	147.096	179.684	177.356	198.404	188.592	180.606	253.541	283.368	240.765	144.04	190.649	191.884	169.051	163.436	150.524	175.338	162.665	181.759	82.7351	43.0274	45.6068	46.0202	57.546	64.7949		154.937	0.169838	1.12493	0.175006	0.97047	0.331812	0.44759		154.937	-0.551852	0.682144	0.177629	-3.10677	0.00189142	0.00446009		154.937	0.106163	1.07636	0.179327	0.592005	0.553847	0.870615
B0336.1	wrm-1	1648.01	1937.96	1941.66	2619.62	2642.94	2495.34	5059.38	4960.85	4865.93	7316.25	4529.25	5824.19	2968.96	2994.34	3121.9	2940.64	3592.02	3047.89	1900.86	2762.81	2676.69	2525.76	2817.5	2417.27		3317	0.488876	1.40335	0.159499	3.06508	0.00217614	0.0067961		3317	0.246678	1.18647	0.158682	1.55454	0.120055	0.162369		3317	0.0765094	1.05446	0.15916	0.480706	0.630725	0.898053
B0336.11	hpo-28	353.207	379.879	455.728	458.648	491.401	482.49	474.674	450.899	441.402	203.643	280.049	321.656	4317.52	3763.98	3140.47	5576.31	3736.16	4051.47	776.28	562.753	630.895	501.941	447.956	452.52		1364.66	0.2683	1.20439	0.181222	1.4805	0.138739	0.22296		1364.66	-0.754604	0.592709	0.186687	-4.04209	5.29767e-05	0.000216296		1364.66	0.252101	1.19094	0.174545	1.44434	0.148645	0.567024
B0336.13	B0336.13	3323.32	2257.94	1253.83	815.948	728.69	750.346	665.307	605.985	704.141	2539.74	1303.3	1120.25	1628.08	1433.28	1661.62	2073.28	1907.72	1902.61	407.547	514.064	508.19	550.102	699.579	567.478		1246.76	-1.57425	0.335818	0.265838	-5.92183	3.1837e-09	4.17699e-08		1246.76	1.32742	2.50954	0.26678	4.97571	6.50098e-07	4.8361e-06		1246.76	0.31701	1.24575	0.265339	1.19474	0.23219	0.662763
B0336.6	abi-1	2644.21	2477.83	1710.33	1528.83	1511.39	1540.83	2529.69	2400.01	2559.56	6364.26	3491.99	3670.21	2144.83	1947.36	1895.23	2147.89	1969.49	2145.93	1233.88	1621.45	1572.35	1575.39	1818.91	1586.43		2253.68	-0.576531	0.670574	0.191386	-3.01239	0.00259195	0.0078604		2253.68	0.851945	1.80493	0.190903	4.46271	8.09277e-06	4.35085e-05		2253.68	0.0650118	1.04609	0.191432	0.339608	0.734152	0.934714
B0336.7	B0336.7	1024.39	1051.03	659.302	503.311	587.91	558.397	610.976	614.601	624.842	1425.5	748.592	966.077	894.241	883.544	1008.7	1068.82	1078.95	952.77	250.248	268.355	289.929	279.332	328.351	264.405		705.94	-0.728907	0.603361	0.193453	-3.76788	0.000164643	0.000693532		705.94	0.759474	1.69287	0.193958	3.91565	9.01596e-05	0.000339942		705.94	0.154053	1.11269	0.192569	0.79999	0.423717	0.803921
B0336.8	lgg-3	3037.94	2155.38	1237.64	1080.49	1058.95	1024.31	240.197	228.8	276.115	448.677	253.121	306.128	322.734	255.554	250.221	545.6	357.246	342.02	217.563	302.324	297.53	303.947	417.491	309.344		636.221	-1.02318	0.492031	0.256416	-3.99031	6.5986e-05	0.000309112		636.221	0.430476	1.34768	0.264996	1.62446	0.104277	0.143419		636.221	0.587771	1.50292	0.262675	2.23764	0.0252445	0.272835
B0336.9	swp-1	887.863	1089.59	1354.07	820.242	916.396	882.093	2138.89	1993.15	2312.1	5965.25	3067.61	3137.81	1129.57	1155.94	1185.62	823.529	832.888	796.418	838.586	1083.61	1093.48	940.738	987.31	866.371		1512.46	-0.347683	0.785845	0.201773	-1.72314	0.084863	0.149172		1512.46	0.916257	1.88721	0.200079	4.57946	4.66171e-06	2.73016e-05		1512.46	-0.500959	0.706637	0.202289	-2.47645	0.0132695	0.20234
B0344.2	wrt-9	432.481	578.434	1151.27	1708.34	1758.42	1911.64	5042.22	5583.11	4965.29	2319.55	4016.55	3467.23	3760.42	4271.12	4129.63	2881.89	2987.69	3071.34	4982.49	4123.83	3808.17	3153.99	2569.26	2999.38		3153.07	1.31383	2.48601	0.240879	5.45433	4.91565e-08	4.92824e-07		3153.07	-0.668747	0.629053	0.239356	-2.79394	0.00520697	0.0105006		3153.07	-0.443788	0.735201	0.239348	-1.85416	0.0637165	0.404517
B0348.5	B0348.5	86.32	99.2773	95.618	146.012	139.894	139.599	3296.03	2704.44	3868.48	16453.7	7489.15	7002.12	241.09	280.317	240.447	207.048	205.906	231.596	305.405	170.977	183.513	175.519	118.477	157.807		1834.95	0.597008	1.51258	0.273706	2.1812	0.0291684	0.0613989		1834.95	1.6484	3.13486	0.254639	6.47347	9.57781e-11	2.46164e-09		1834.95	-0.241114	0.846091	0.2653	-0.908837	0.363436	0.769997
B0348.6	ife-3	2719.08	2212.82	1352.53	2781.95	3299.91	3065.95	3097.77	2522.55	3669.75	16372.6	7365.28	6865.69	4049.54	3707.52	5810.8	4187.59	4596.84	4324.11	5290.96	9083.31	5946.26	7406.04	9755.75	7575.78		5294.18	0.541777	1.45576	0.285384	1.89841	0.0576415	0.109136		5294.18	1.71966	3.29359	0.285085	6.03209	1.61849e-09	2.74031e-08		5294.18	-0.0496945	0.966141	0.285093	-0.17431	0.861622	0.972741
B0353.1	B0353.1	2533.23	2565.62	3133.8	4291.88	4707.71	4486.37	3876.51	4261.04	3710.83	2178.82	2940.51	3156.67	4076.43	4714.88	4047.52	3867.7	4546.4	4238.12	5634.16	5098.74	5427.21	5259.14	5092.26	5096.85		4122.6	0.711855	1.63791	0.13139	5.41787	6.03144e-08	5.94276e-07		4122.6	-0.516085	0.699267	0.131945	-3.91136	9.17777e-05	0.000345314		4122.6	-0.0211767	0.985429	0.131301	-0.161284	0.87187	0.976793
B0361.3	B0361.3	1301.85	1226.61	890.636	692.267	652.545	631.686	713.918	763.944	720.383	811.261	757.209	758.664	984.529	1005.38	1135.77	1006.33	991.435	971.337	1027.55	1201.37	1126.05	948.23	1163.33	1046.12		938.684	-0.789951	0.578364	0.131941	-5.98716	2.1354e-09	2.92228e-08		938.684	0.0810156	1.05776	0.134286	0.603305	0.546306	0.606771		938.684	-0.0740995	0.949935	0.131624	-0.562964	0.573459	0.877514
B0361.4	B0361.4	27.3053	35.2804	41.6401	43.8035	46.9266	33.1548	61.9555	60.3113	64.0128	38.0796	51.7013	55.4579	107.578	107.967	95.7878	81.1405	72.067	102.606	63.3281	45.292	57.5515	40.669	29.3372	44.9384		58.6621	0.242107	1.18272	0.246092	0.983804	0.325212	0.440585		58.6621	-0.336571	0.791921	0.240621	-1.39876	0.161885	0.211419		58.6621	-0.282386	0.82223	0.209855	-1.34562	0.178424	0.608952
B0361.5	psd-1	1097.5	1042.82	750.293	931.039	940.302	901.287	833.063	834.786	865.606	1241.73	992.019	912.838	1957.53	2039.48	1932.37	2066.75	2342.18	2283.72	422.868	439.332	473.442	551.172	576.589	502.683		1122.14	-0.0594137	0.959654	0.137405	-0.432397	0.665453	0.759715		1122.14	0.309348	1.23915	0.13879	2.2289	0.0258204	0.0420915		1122.14	0.174607	1.12866	0.135201	1.29147	0.196541	0.625166
B0361.6	B0361.6	2178.26	1758.27	1038.69	751.531	738.429	748.601	822.578	790.749	823.568	1650.67	871.383	1110.27	432.232	403.142	400.745	466.325	416.959	406.515	280.891	356.674	320.334	282.542	348.661	276.946		736.457	-1.15186	0.450044	0.216965	-5.30897	1.10246e-07	1.02132e-06		736.457	0.573436	1.48806	0.217872	2.63199	0.00848869	0.0160369		736.457	0.061461	1.04352	0.221681	0.27725	0.781588	0.952307
B0361.7	pho-5	545.225	536.59	491.199	480.121	500.255	477.255	339.325	334.106	372.612	1268.22	666.732	703.207	321.773	244.659	354.806	319.899	326.36	274.593	131.763	161.919	160.71	145.552	222.286	171.393		397.94	-0.109756	0.926745	0.204794	-0.535935	0.592003	0.695501		397.94	1.33005	2.51412	0.206196	6.45043	1.11534e-10	2.75748e-09		397.94	-0.000843653	0.999415	0.209819	-0.00402087	0.996792	1
B0361.8	algn-11	1422.52	1359.52	973.916	841.714	793.325	785.246	590.96	601.199	575.16	629.141	546.095	639.984	2992.01	2899.25	3025.13	2693.49	3211.1	3010.75	1617.93	2305.36	1995.84	1917.86	2270.25	2011.78		1654.56	-0.633498	0.644611	0.147597	-4.29209	1.77e-05	9.54133e-05		1654.56	0.0374319	1.02629	0.1522	0.245939	0.805729	0.840429		1654.56	-0.000264803	0.999816	0.145033	-0.00182581	0.998543	1
B0361.9	B0361.9	350.565	249.424	268.347	261.962	262.966	254.769	338.372	392.502	378.344	240.067	326.365	342.73	201.708	187.208	203.305	166.012	167.813	181.759	929.493	793.742	806.807	626.088	682.654	660.49		386.396	-0.153601	0.899004	0.147778	-1.0394	0.298618	0.411221		386.396	-0.276476	0.825605	0.149018	-1.85531	0.0635517	0.0927444		386.396	-0.200124	0.870476	0.157851	-1.2678	0.204868	0.636318
B0365.3	eat-6	7759.11	10337.1	17112.5	19969.2	19625	19899.9	22019.9	24297.8	21586.7	27423.9	25046.1	20851.1	30127.6	33772.8	35543.1	22853.6	28625	27737.8	38880.4	31227.7	30124.4	32878.7	26634.8	33303.6		25318.2	0.756752	1.68968	0.202646	3.73436	0.000188195	0.000782115		25318.2	0.110679	1.07974	0.202612	0.546259	0.584888	0.643818		25318.2	-0.328082	0.796595	0.202564	-1.61964	0.105309	0.502808
B0365.7	dhc-3	29.9478	28.7166	62.4602	65.2758	51.3536	42.7523	88.644	119.665	123.249	46.3578	76.4749	57.6762	47.0653	55.4691	43.9842	54.0936	48.3878	37.1336	73.5423	63.4088	65.1526	75.9868	60.9311	42.8483		60.8574	0.388315	1.30886	0.287346	1.35138	0.176573	0.269995		60.8574	-0.860898	0.55061	0.278407	-3.09223	0.00198662	0.00462509		60.8574	-0.0683637	0.953719	0.29253	-0.233698	0.81522	0.962617
B0379.1	B0379.1	150.62	145.224	185.067	234.478	177.967	146.579	115.333	113.921	121.338	74.5036	136.793	100.933	317.931	287.251	376.309	444.874	300.622	354.724	142.999	100.775	127.048	79.1975	55.2893	87.7867		182.398	0.216483	1.1619	0.220451	0.982	0.3261	0.441466		182.398	-0.150071	0.901206	0.236212	-0.635323	0.525218	0.586265		182.398	0.165451	1.12152	0.213801	0.773854	0.439017	0.81478
B0379.4	scpl-1	1084.29	1343.94	1876.12	2154.96	2166.59	2063.45	2735.57	2623.06	2877.71	6865.92	3683.72	3458.36	803.952	825.104	878.706	594.097	873.04	905.865	1261.45	1120.98	1035.93	915.052	630.75	745.142		1813.49	0.56863	1.48311	0.228725	2.48608	0.0129159	0.031165		1813.49	0.765448	1.6999	0.228176	3.35464	0.000794688	0.00214024		1813.49	-0.0799416	0.946096	0.230873	-0.346258	0.729149	0.933207
B0393.1	rps-0	22264.4	18573.9	15167	21939.5	23303	23321.8	25051.9	26625.1	25780.9	19127.6	21861	20970.9	20796.1	22894.9	21175.9	19100.7	21753.9	24348.9	26528.3	21104.9	24038.1	20016.6	21558.3	20815.9		22005	0.291937	1.22428	0.131231	2.2246	0.0261079	0.0561158		22005	-0.322009	0.799955	0.131275	-2.45293	0.0141697	0.0250353		22005	0.00745759	1.00518	0.131252	0.0568188	0.95469	0.998861
B0393.2	rbg-3	1837.38	2070.88	1927.01	1480.73	1416.65	1502.44	1012.26	953.494	1077.71	3554.65	1660.9	1802.38	1585.81	1702.7	2307.7	1279.59	1829.47	1693.49	1195.06	1781.11	1377.98	1414.85	1607.9	1406.68		1644.95	-0.40737	0.753997	0.224614	-1.81365	0.0697318	0.127079		1644.95	1.20368	2.30326	0.22534	5.34161	9.21227e-08	9.00433e-07		1644.95	-0.220777	0.858103	0.224794	-0.982128	0.326037	0.739062
B0393.3	B0393.3	4129.27	4499.48	4267.34	4481.7	4403.13	4470.67	4291.13	3823.55	4392.04	11435.5	5550.35	6837.96	3655.73	3733.27	3991.81	3652.25	4329.17	4070.04	291.105	612.574	501.675	490.168	633.006	529.855		3711.36	0.0504944	1.03562	0.22068	0.228813	0.819014	0.875894		3711.36	0.929266	1.90431	0.220684	4.21084	2.54423e-05	0.000115493		3711.36	0.0825787	1.05891	0.220858	0.373899	0.708479	0.927084
B0393.7	B0393.7	68.7037	74.6631	89.4491	52.3924	48.6974	48.8597	1.90632	3.82929	4.77708	1.65564	0	3.32748	0	0	0	0	1.02953	0.9772	3.06426	1.1323	2.17175	3.21071	3.38506	2.09016		17.3051	-0.636203	0.643404	0.283233	-2.24622	0.0246899	0.0534851		17.3051	-1.09085	0.469485	0.877994	-1.24243	0.214077	0.269482		17.3051	1.86193	3.63493	1.57743	1.18035	0.23786	0.669047
B0393.9	B0393.9	137.407	95.1749	92.5336	102.208	97.3948	94.2295	14.2974	13.4025	22.93	43.0465	19.388	17.7465	544.613	518.042	939.307	492.439	639.337	538.437	44.9425	29.4398	39.0916	43.8797	62.0595	61.6597		195.959	-0.143766	0.905154	0.261539	-0.549691	0.582532	0.686868		195.959	0.596281	1.51181	0.360936	1.65204	0.0985261	0.136522		195.959	-0.26164	0.834139	0.243267	-1.07552	0.28214	0.704334
B0395.1	nhx-1	149.739	146.865	134.174	152.024	158.488	141.344	79.1124	86.1591	67.8345	43.0465	53.8555	65.4404	134.472	141.644	137.817	131.504	165.754	167.101	179.77	123.421	162.882	140.201	178.28	155.717		129.027	0.0697843	1.04956	0.169383	0.411991	0.680346	0.771156		129.027	-0.49884	0.707675	0.21211	-2.3518	0.0186829	0.0316926		129.027	0.164431	1.12072	0.173188	0.949437	0.342398	0.751759
B0395.2	mboa-1	534.656	519.36	619.204	715.457	730.461	725.916	1429.74	1503.95	1269.75	539.737	1035.1	916.165	801.071	774.587	710.589	850.576	716.551	826.711	734.402	481.227	514.706	477.326	399.437	443.114		761.242	0.376015	1.29775	0.188757	1.99205	0.0463653	0.0905517		761.242	-0.750441	0.594422	0.187898	-3.99387	6.50024e-05	0.000258742		761.242	0.0665238	1.04719	0.188438	0.353027	0.724068	0.932313
B0395.3	B0395.3	1164.44	1430.91	2002.58	2492.5	2415.39	2529.36	1129.5	1254.09	1164.65	915.566	1085.73	1114.7	1034.48	1238.15	936.375	995.137	1067.62	1058.31	890.679	862.812	966.431	932.176	982.796	938.482		1275.12	0.693258	1.61693	0.154921	4.47492	7.64394e-06	4.51499e-05		1275.12	-0.185729	0.879205	0.157467	-1.17948	0.238206	0.295946		1275.12	-0.0401057	0.972584	0.157067	-0.255342	0.798459	0.956371
B0399.1	kcnl-1	83.6776	91.0726	212.827	234.478	219.581	169.264	45.7517	47.8661	61.1466	28.1458	37.6989	29.9473	99.8937	125.796	122.178	83.9384	97.8052	121.173	434.104	264.958	291.015	314.65	213.259	279.036		154.553	0.682136	1.60451	0.281387	2.42419	0.0153424	0.0360038		154.553	-0.681172	0.623658	0.33441	-2.03693	0.0416567	0.0637475		154.553	-0.199843	0.870645	0.290562	-0.687783	0.491589	0.844415
B0403.2	ubc-17	33.471	54.1512	81.738	62.6991	69.9472	65.4371	3695.41	3937.47	3557.97	2834.45	2909.28	3654.68	44.1838	45.5639	61.5779	52.2284	67.9488	71.3356	129.72	138.141	147.679	185.151	176.023	169.303		926.898	0.214842	1.16058	0.222	0.967756	0.333166	0.449153		926.898	-0.251487	0.84003	0.174751	-1.43911	0.150119	0.197568		926.898	0.337624	1.26367	0.232729	1.45072	0.146858	0.566288
B0403.3	B0403.3	19.378	10.6662	16.1934	29.2023	30.9892	20.9399	5.71897	9.57323	4.77708	3.31127	1.07711	7.76411	4.80258	3.96208	1.95485	2.79795	5.14764	4.886	39.8354	27.1752	22.8034	24.6154	32.7223	31.3524		15.0686	0.814614	1.75883	0.369519	2.20453	0.0274874	0.0586378		15.0686	-0.704998	0.613444	0.621015	-1.13523	0.256277	0.315598		15.0686	0.247188	1.18689	0.652819	0.378646	0.70495	0.926098
B0403.5	B0403.5	524.967	471.772	658.531	835.702	826.085	842.83	372.686	362.825	379.3	299.67	410.379	277.29	550.376	526.957	601.117	825.394	595.067	836.483	714.995	444.994	508.19	1076.66	463.753	1220.65		609.445	0.597289	1.51287	0.252162	2.36867	0.0178521	0.0408243		609.445	-0.173486	0.886697	0.257479	-0.673788	0.500446	0.563278		609.445	0.427445	1.34485	0.252861	1.69044	0.0909446	0.473113
B0403.6	B0403.6	19.378	19.6914	16.1934	26.6257	23.0206	21.8124	14.2974	3.82929	11.465	4.96691	14.0024	13.3099	34.5786	28.7251	21.5034	27.0468	21.6201	39.088	74.5637	62.2765	61.895	101.672	46.2625	83.6064		32.9763	0.373855	1.29581	0.352606	1.06026	0.289025	0.400831		32.9763	0.195343	1.145	0.45992	0.424733	0.671031	0.724138		32.9763	0.0505483	1.03566	0.339144	0.149047	0.881517	0.979208
B0410.2	vang-1	1916.66	1986.37	1753.51	1725.51	1847.84	1753.72	2725.09	2832.72	2730.58	4172.2	3016.99	3486.09	2014.2	2069.2	1878.61	2136.7	2316.44	2228.99	981.585	1507.09	1599.5	1360.27	1571.8	1286.49		2120.76	-0.0865219	0.941791	0.152563	-0.567122	0.570632	0.676103		2120.76	0.364309	1.28726	0.152056	2.39589	0.0165801	0.0286216		2120.76	0.164463	1.12075	0.15257	1.07795	0.281055	0.703983
B0412.1	dac-1	40.5176	33.6394	30.0734	36.9324	53.1244	35.7723	66.7213	69.8846	36.3058	26.4902	34.4675	45.4755	75.8808	69.3364	66.465	54.0936	51.4764	61.5636	43.9211	26.0429	42.3492	28.8964	37.2357	21.9467		45.3588	0.274593	1.20965	0.280879	0.977619	0.328263	0.443587		45.3588	-0.676127	0.625843	0.289143	-2.33839	0.0193671	0.0326903		45.3588	-0.34068	0.789669	0.264122	-1.28986	0.197099	0.625166
B0412.2	daf-7	22.9012	19.6914	20.0489	86.7481	110.676	124.767	144.881	133.068	150.956	173.842	242.35	206.303	15.3683	13.8673	15.6388	26.1142	42.2106	31.2704	110.313	75.8641	83.6125	141.271	127.504	156.762		94.8345	2.36518	5.15217	0.249231	9.48993	2.31189e-21	4.40978e-19		94.8345	0.54513	1.45915	0.194803	2.79837	0.00513617	0.010396		94.8345	1.14286	2.20818	0.30806	3.70985	0.00020738	0.010631
B0414.2	rnt-1	148.858	178.043	188.923	234.478	232.862	204.164	520.426	511.21	419.427	278.147	317.748	392.642	162.327	215.933	180.824	232.23	232.673	273.616	207.348	140.405	142.25	145.552	125.247	126.455		242.158	0.378991	1.30043	0.178757	2.12015	0.0339936	0.0696442		242.158	-0.548491	0.683735	0.173113	-3.1684	0.0015328	0.00374113		242.158	0.402054	1.32139	0.179795	2.23618	0.0253398	0.272968
B0414.5	cpb-3	1363.5	1552.34	1317.06	1389.69	1391.86	1454.45	2091.24	1543.2	2184.08	12410.6	4983.79	4406.69	1664.57	1536.3	2292.06	1110.79	1555.62	1508.8	853.908	1443.68	1000.09	1122.68	1216.37	971.924		2181.89	0.00106204	1.00074	0.280351	0.00378824	0.996977	1		2181.89	1.90521	3.74563	0.279691	6.81183	9.63664e-12	3.68202e-10		2181.89	-0.395828	0.760053	0.280395	-1.41168	0.158045	0.582492
B0414.7	mtk-1	1826.81	2156.2	2213.87	1981.46	1969.15	2073.05	1287.72	1350.78	1151.28	976.825	937.086	1093.63	1391.79	1429.32	1302.91	1079.08	1237.49	1036.81	459.639	527.652	516.877	580.068	569.819	581.064		1238.77	-0.0411868	0.971855	0.109113	-0.377471	0.705823	0.791591		1238.77	-0.33294	0.793917	0.11284	-2.95054	0.00317223	0.00689219		1238.77	-0.298763	0.812949	0.111482	-2.67992	0.00736399	0.140026
B0414.8	vps-51	808.59	958.313	744.124	588.341	520.619	545.309	971.272	958.28	939.173	2245.04	1182.67	1232.28	1321.67	1250.04	1320.5	1093.06	1213.81	1203.91	601.617	747.318	803.549	720.269	830.468	725.285		980.23	-0.601948	0.658864	0.187561	-3.20934	0.0013304	0.00439471		980.23	0.696798	1.6209	0.186184	3.74253	0.000182174	0.000615184		980.23	-0.148887	0.901946	0.185746	-0.801561	0.422807	0.803274
B0416.1	tmc-2	384.036	561.204	901.431	887.236	890.72	827.125	1146.65	1345.04	1012.74	529.803	835.838	852.943	894.241	1027.17	887.503	897.208	996.583	875.571	1464.72	1075.68	1373.63	1338.87	1311.15	1329.34		985.268	0.495407	1.40972	0.222527	2.22628	0.0259952	0.0559545		985.268	-0.65671	0.634323	0.222839	-2.94702	0.0032085	0.00695321		985.268	-0.0205081	0.985885	0.222155	-0.0923144	0.926448	0.989273
B0416.3	B0416.3	13.2122	11.4866	7.71113	18.0367	18.5935	14.8324	7.62529	8.61591	12.4204	3.31127	9.694	6.65495	39.3812	25.7535	36.1648	52.2284	51.4764	41.0424	18.3856	5.6615	6.51526	11.7726	4.51341	12.541		18.2346	0.67664	1.59841	0.400841	1.68805	0.0914015	0.158752		18.2346	-0.4697	0.722115	0.51623	-0.909864	0.362894	0.427202		18.2346	0.513906	1.42791	0.326085	1.57599	0.115029	0.522902
B0416.7	B0416.7	7.04653	2.46142	5.39779	1.71778	0.885407	0.872495	0.953161	0.957323	0.955415	1.65564	3.23133	4.43663	1.92103	5.94312	0.977426	1.8653	5.14764	2.9316	14.2999	12.4553	5.42939	17.1238	7.89848	16.7213		5.13688	-2.08975	0.234921	0.9133	-2.28813	0.02213	0.0488562		5.13688	1.76392	3.39619	1.07605	1.63925	0.101162	NA		5.13688	0.160116	1.11738	0.797509	0.20077	0.840879	0.967705
B0432.10	B0432.10	1113.35	845.908	444.932	323.802	344.423	320.206	494.691	420.265	522.612	1596.03	941.395	883.999	223.8	260.507	237.515	307.774	293.415	294.137	234.927	369.13	314.904	464.483	550.637	454.61		510.727	-1.28175	0.411296	0.250279	-5.12129	3.0345e-07	2.5681e-06		510.727	1.24884	2.3765	0.249502	5.00532	5.57687e-07	4.20324e-06		510.727	0.310946	1.24052	0.255306	1.21793	0.223249	0.658105
B0432.13	trul-1	964.494	806.525	712.509	552.268	544.525	540.074	1320.13	1139.21	1356.69	6807.97	2776.79	2917.09	97.9727	92.1184	120.223	123.11	142.075	116.287	643.495	966.984	778.574	964.283	1111.43	884.137		1103.29	-0.601228	0.659193	0.248147	-2.42287	0.0153982	0.0361235		1103.29	1.71104	3.27398	0.24599	6.95574	3.50715e-12	1.70451e-10		1103.29	0.297236	1.22879	0.267713	1.11028	0.26688	0.695575
B0432.2	djr-1.1	3622.8	2347.37	1351.76	1178.4	1135.09	1136.86	357.436	326.447	397.453	668.877	492.24	509.104	140.235	132.73	129.02	161.348	126.632	143.648	259.441	289.869	317.076	272.91	353.175	300.983		672.955	-1.08521	0.471325	0.228924	-4.74046	2.13229e-06	1.47007e-05		672.955	0.624746	1.54194	0.234689	2.66201	0.0077675	0.0148512		672.955	0.10346	1.07435	0.247831	0.417461	0.676342	0.916486
B0432.3	mrpl-41	1555.52	1076.46	501.995	430.305	471.037	369.065	295.48	324.532	276.115	178.809	236.964	272.853	501.39	470.497	412.474	539.071	469.465	510.099	230.841	249.106	262.782	282.542	289.987	227.827		434.801	-1.30217	0.405516	0.251574	-5.1761	2.26576e-07	1.97596e-06		434.801	-0.37496	0.771127	0.259558	-1.44461	0.148568	0.195888		434.801	0.133665	1.09708	0.253225	0.527852	0.597602	0.885415
B0432.4	misc-1	2274.27	1764.02	1362.56	1025.52	1110.3	1073.17	1251.5	1171.76	1295.54	2764.91	1806.31	1645.99	513.876	555.682	566.907	591.3	676.4	658.633	671.073	827.711	725.366	707.426	854.164	696.023		1107.93	-0.750776	0.594284	0.183227	-4.09753	4.17588e-05	0.000204505		1107.93	0.739638	1.66976	0.183445	4.03194	5.53194e-05	0.000224706		1107.93	0.235127	1.17701	0.187053	1.25701	0.208751	0.642512
B0432.5	cat-2	28.1861	31.178	37.7846	47.2391	51.3536	38.3898	52.4239	47.8661	60.1912	44.7022	51.7013	35.4931	69.1572	73.2985	82.1038	62.4875	74.126	76.2216	100.099	82.6579	59.7232	55.6523	49.6476	78.381		57.9194	0.490693	1.40512	0.254846	1.92545	0.054173	0.103491		57.9194	-0.283406	0.821649	0.25746	-1.10077	0.270995	0.330984		57.9194	-0.0785502	0.947009	0.229679	-0.342	0.732351	0.934154
B0432.7	B0432.7	521.443	769.604	966.205	1077.91	1179.36	1085.38	1608.94	1631.28	1538.22	3016.57	1919.41	1861.17	2010.36	2211.83	2345.82	1962.29	2258.78	1918.24	1158.29	1040.58	1098.91	1095.92	1078.71	1030.45		1516.07	0.56558	1.47998	0.186201	3.03747	0.00238571	0.00735792		1516.07	0.506791	1.42089	0.184869	2.74135	0.0061187	0.0120835		1516.07	-0.0974343	0.934694	0.184417	-0.528336	0.597266	0.885415
B0454.5	B0454.5	22.0204	9.02521	3.85557	6.01224	12.3957	12.2149	12.3911	24.8904	20.0637	18.212	14.0024	14.4191	0	0	2.93228	0.932649	1.02953	1.9544	0	0	1.08588	3.21071	1.12835	1.04508		7.61757	-0.174034	0.886361	0.564992	-0.30803	0.75806	0.831864		7.61757	-0.310463	0.806383	0.549268	-0.565229	0.571918	NA		7.61757	0.418294	1.33635	1.19341	0.350503	0.725961	0.932313
B0457.1	lat-1	3702.95	5563.63	5769.47	6662.43	7058.47	6528.01	6105	6211.11	5778.35	13322.9	7002.3	7893.88	6339.41	6158.07	6986.64	6053.83	7165.51	6422.16	4948.78	5951.37	5516.26	5419.68	6071.67	5190.91		6409.28	0.429332	1.34661	0.191737	2.23917	0.025145	0.054354		6409.28	0.640667	1.55905	0.191739	3.34136	0.000833696	0.00222932		6409.28	0.0115827	1.00806	0.191748	0.0604057	0.951833	0.997891
B0457.2	B0457.2	71.3461	68.0993	117.209	88.4659	54.0098	39.2623	20.9696	33.5063	34.3949	18.212	40.9302	35.4931	107.578	82.2132	90.9007	109.12	73.0965	98.6972	65.3709	43.0274	46.6927	66.3547	27.0805	77.3359		62.8903	-0.499286	0.707457	0.332373	-1.50218	0.13305	0.215539		62.8903	0.122246	1.08843	0.378595	0.322893	0.746776	0.788607		62.8903	0.00210555	1.00146	0.329097	0.00639795	0.994895	1
B0457.6	B0457.6	221.966	180.504	200.489	257.668	270.049	246.916	263.073	233.587	259.873	264.902	292.974	235.142	607.046	609.17	644.124	856.172	807.15	922.477	558.717	440.464	503.847	600.403	502.117	578.974		439.909	0.362459	1.28562	0.136478	2.65581	0.00791173	0.0205644		439.909	0.0682571	1.04845	0.139214	0.490305	0.623918	0.679868		439.909	0.475207	1.39012	0.123768	3.83951	0.000123279	0.00718953
B0464.2	ctr-9	3945.18	4310.77	3890.27	2326.74	3106.01	3108.7	4773.43	4425.7	4581.22	8889.11	5078.58	5824.19	3219.65	3341.03	3460.09	3022.72	2916.65	2519.22	794.665	1210.43	1018.55	1308.9	1419.47	1214.38		3321.07	-0.507978	0.703207	0.180574	-2.81314	0.00490607	0.0137049		3321.07	0.521682	1.43563	0.180366	2.89234	0.00382379	0.0080951		3321.07	-0.24449	0.844114	0.180823	-1.3521	0.176345	0.60607
B0464.3	nlp-36	2568.46	1937.96	1207.56	1213.61	1241.34	1160.42	340.279	324.532	359.236	187.087	301.591	234.032	473.535	428.895	398.79	698.554	432.402	569.708	391.204	271.752	297.53	321.071	322.709	339.651		667.58	-0.660069	0.632848	0.219443	-3.00793	0.00263036	0.00796387		667.58	-0.496362	0.708892	0.230099	-2.15717	0.0309928	0.0491332		667.58	0.386719	1.30742	0.223859	1.72751	0.0840755	0.45922
B0464.4	bre-3	757.502	808.987	726.389	1125.15	1202.38	1036.52	1334.43	1203.35	1479.94	6927.18	2622.76	2548.85	957.635	973.682	1208.1	774.099	1015.11	1000.65	356.476	335.161	315.99	390.636	251.623	361.598		1238.09	0.553059	1.46719	0.262815	2.10437	0.0353463	0.0719465		1238.09	1.58943	3.00931	0.261723	6.07296	1.25576e-09	2.19374e-08		1238.09	-0.170422	0.888583	0.262987	-0.648026	0.516968	0.855093
B0464.5	spk-1	6762.03	7320.26	8011.87	8950.51	9547.34	9541.61	5753.28	6111.55	5761.15	9546.39	6050.13	6854.6	5240.58	5532.06	5261.49	4322.83	5056.01	4841.05	4140.84	4434.08	4266.41	4369.78	4320.47	4255.56		6093.83	0.343742	1.26904	0.131521	2.61358	0.00895985	0.0228165		6093.83	0.348282	1.27304	0.13186	2.6413	0.00825875	0.0156605		6093.83	-0.173289	0.886819	0.132006	-1.31274	0.189272	0.616576
B0464.6	B0464.6	3147.16	3244.97	2503.8	3242.32	3067.94	3177.63	8182.89	8278.93	8326.44	20718.6	11321.5	12218.5	2180.37	2148.44	2648.83	2104.06	2560.44	2197.72	954.007	1845.65	1295.45	1638.53	1852.76	1597.93		4602.29	0.0930001	1.06659	0.211927	0.43883	0.660785	0.756359		4602.29	0.836069	1.78518	0.211351	3.95582	7.62712e-05	0.000296334		4602.29	-0.0241271	0.983415	0.212409	-0.113588	0.909564	0.983647
B0464.7	baf-1	13149.7	8530.46	4500.22	2753.61	2930.7	2618.36	5104.18	4491.76	5321.66	14804.7	7090.62	8926.51	10102.7	8422.4	8510.45	14158.5	13731.8	11769.4	3980.48	8696.06	7741.22	8773.8	10389.9	8660.58		8131.66	-1.65679	0.317143	0.293573	-5.64355	1.66582e-08	1.84131e-07		8131.66	1.04675	2.06587	0.293463	3.56687	0.00036127	0.00110076		8131.66	0.552817	1.46695	0.293305	1.88479	0.0594585	0.393736
B0464.8	tag-342	2730.53	1957.65	1231.47	754.107	681.763	773.903	578.569	460.472	608.599	2960.28	1329.15	1238.93	441.838	407.104	476.007	491.506	537.414	463.193	199.177	277.413	234.549	372.442	426.518	340.696		832.22	-1.4214	0.373351	0.26695	-5.32458	1.01189e-07	9.50433e-07		832.22	1.74471	3.35127	0.26803	6.50937	7.54652e-11	2.03471e-09		832.22	0.171312	1.12608	0.27028	0.633832	0.52619	0.856752
B0464.9	B0464.9	1319.46	1078.92	662.386	603.801	571.088	573.229	414.625	410.691	414.65	915.566	537.478	559.016	713.664	703.27	759.46	928.919	849.361	798.373	602.638	949.999	643.925	769.5	855.292	664.671		720.833	-0.8076	0.571331	0.220618	-3.66063	0.000251593	0.00100841		720.833	0.694266	1.61806	0.223611	3.10479	0.00190415	0.00447538		720.833	0.243623	1.18396	0.220903	1.10285	0.270091	0.697475
B0478.1	jnk-1	474.76	436.492	546.719	453.495	400.204	434.503	934.098	978.384	922.931	402.319	677.503	627.784	553.257	598.274	601.117	512.024	490.055	543.323	436.147	322.705	346.395	295.385	286.602	318.749		524.718	-0.178919	0.883365	0.159347	-1.12283	0.261512	0.370127		524.718	-0.724239	0.605316	0.158281	-4.57567	4.74707e-06	2.77106e-05		524.718	-0.181384	0.881857	0.159012	-1.14069	0.253999	0.684721
B0478.3	B0478.3	56.3723	50.0489	47.0379	86.7481	50.4682	75.0346	14.2974	17.2318	18.1529	3.31127	9.694	8.87327	32.6576	40.6113	30.3002	33.5754	27.7973	32.2476	13.2785	16.9845	11.9446	22.475	15.797	16.7213		30.4859	0.471031	1.3861	0.249028	1.89147	0.0585611	0.110399		30.4859	-1.09819	0.467101	0.439845	-2.49678	0.0125327	0.0224991		30.4859	-0.14269	0.905829	0.289211	-0.493375	0.621747	0.896322
B0491.2	sqt-1	0	1.64095	0	0	0.885407	0	12.3911	14.3598	15.2866	26.4902	15.0795	14.4191	66.2756	46.5545	56.6907	53.161	78.2441	82.0848	21.4498	19.2491	21.7175	39.5988	34.979	48.0737		27.8596	-0.809945	0.570404	1.57411	-0.51454	0.606874	0.708163		27.8596	0.358917	1.28246	0.380782	0.942578	0.345897	0.409856		27.8596	0.329598	1.25666	0.266608	1.23627	0.216359	0.649351
B0491.4	lgc-20	218.443	192.811	238.274	269.692	280.674	324.568	281.183	298.685	268.472	119.206	218.653	166.374	86.4465	73.2985	101.652	58.7569	53.5355	77.1988	354.433	260.429	310.561	328.563	297.885	314.569		216.432	0.429332	1.34661	0.181191	2.36949	0.0178125	0.0407588		216.432	-0.734076	0.601203	0.188753	-3.88908	0.000100626	0.000372716		216.432	-0.463467	0.725241	0.215949	-2.14619	0.0318576	0.300363
B0491.5	nduf-11	4153.93	4102.37	3402.15	4209.43	4593.49	4472.41	2806.11	2823.15	2840.45	5784.79	3528.61	3340.79	2749.96	2937.88	3066.19	2388.51	3169.92	3048.86	3789.47	3721.87	3689.81	3333.79	3656.99	3459.21		3544.59	0.187431	1.13873	0.163736	1.14472	0.252325	0.360901		3544.59	0.578011	1.49279	0.164228	3.51956	0.000432261	0.00128314		3544.59	-0.0244897	0.983168	0.1643	-0.149055	0.88151	0.979208
B0491.8	clh-2	48.4449	52.5103	80.9669	94.4781	73.4888	68.9271	18.1101	24.8904	20.0637	14.9007	17.2338	18.8557	75.8808	73.2985	62.5553	58.7569	64.8603	90.8796	111.335	71.3349	91.2137	48.1606	31.5939	65.84		57.4408	0.376906	1.29855	0.262409	1.43633	0.150908	0.238801		57.4408	-0.291142	0.817255	0.365664	-0.7962	0.425916	0.491626		57.4408	0.0181672	1.01267	0.266281	0.0682258	0.945606	0.995326
B0495.1	sre-1	5.2849	4.10237	4.62668	5.15335	9.73948	9.59745	6.67213	5.74394	3.82166	1.65564	1.07711	6.65495	0.960516	0.990521	3.90971	5.59589	6.17717	4.886	6.12852	2.2646	7.60114	6.42142	3.38506	6.27048		4.94669	0.806215	1.74862	0.597221	1.34994	0.177034	0.270533		4.94669	-0.732986	0.601658	0.739671	-0.990961	0.321705	NA		4.94669	1.50649	2.84118	0.793281	1.89906	0.057556	0.388644
B0495.10	cpna-5	723.15	755.656	951.554	930.18	941.188	978.067	1025.6	1036.78	891.402	514.903	683.965	605.601	1192	1211.41	1105.47	1130.37	1154.1	1028.01	843.694	561.62	734.053	567.225	533.711	609.281		862.875	0.228927	1.17196	0.147092	1.55635	0.119625	0.19749		862.875	-0.707108	0.612547	0.149774	-4.72118	2.3448e-06	1.50391e-05		862.875	-0.0831275	0.944009	0.146589	-0.567079	0.57066	0.877214
B0495.4	nhx-2	508.231	526.744	511.248	651.04	602.077	647.391	338.372	333.148	300	144.04	268.201	210.74	397.654	357.578	433.977	530.677	424.166	516.939	126.656	89.4516	114.017	105.953	88.0116	97.1924		346.813	0.297657	1.22915	0.160404	1.85567	0.0634999	0.117623		346.813	-0.624277	0.648745	0.172901	-3.61061	0.000305474	0.000955609		346.813	0.308029	1.23802	0.163579	1.88306	0.0596926	0.393815
B0495.5	B0495.5	662.374	578.434	498.139	572.022	540.098	564.504	819.719	876.908	839.81	2346.04	1381.93	1377.57	315.049	350.644	270.747	330.158	329.449	342.997	600.595	734.862	642.839	987.828	1060.65	891.453		746.451	-0.0520493	0.964565	0.176608	-0.294716	0.768211	0.838971		746.451	1.0065	2.00904	0.174434	5.77011	7.9221e-09	1.07203e-07		746.451	0.0985971	1.07073	0.18255	0.540111	0.589121	0.883157
B0495.6	moa-2	3678.29	2582.85	1367.95	604.66	574.629	520.007	486.112	448.027	554.141	1109.28	556.866	628.893	927.859	910.288	806.377	1760.84	1173.66	1182.41	1675.13	1851.31	1796.04	1895.39	2297.33	1983.56		1307.16	-2.16637	0.22277	0.263009	-8.23689	1.76752e-16	1.15338e-14		1307.16	0.621708	1.5387	0.265289	2.34351	0.0191034	0.0323558		1307.16	0.638693	1.55692	0.262952	2.42893	0.0151433	0.216995
B0495.7	B0495.7	3122.49	3635.52	3537.1	4734.21	4667.87	4918.26	1333.47	1292.39	1326.12	3889.09	2112.21	1927.72	2683.68	2776.43	3357.46	2363.33	3060.79	2814.34	2217.5	2936.05	2316.18	2624.22	2815.24	2527		2874.53	0.476071	1.39095	0.194277	2.45048	0.0142667	0.0338113		2874.53	1.00282	2.00391	0.195677	5.12487	2.97742e-07	2.42573e-06		2874.53	-0.0980811	0.934275	0.194751	-0.503622	0.614527	0.894168
B0495.8	luc-7L	3483.63	2707.56	2154.49	1128.58	1142.18	1149.95	1119.96	927.646	1064.33	1824.51	1058.8	1268.88	1898.94	1633.37	1767.19	2330.69	1986.99	1825.41	983.628	1285.16	1398.61	1471.58	1911.43	1478.79		1625.1	-1.28657	0.409924	0.196243	-6.55602	5.52614e-11	1.08467e-09		1625.1	0.413815	1.3322	0.197626	2.09394	0.0362658	0.0564038		1625.1	0.213152	1.15922	0.196189	1.08646	0.277274	0.702011
B0496.3	unc-82	944.235	1392.34	2613.3	2148.09	2150.65	2195.2	2575.44	2764.75	2416.24	1105.96	1868.79	1997.59	3005.46	3233.06	3039.8	2257.94	2486.31	2249.51	2385.02	1875.09	2123.98	1979.94	1773.77	2098.52		2195.04	0.391332	1.3116	0.244799	1.59858	0.109913	0.184611		2195.04	-0.640232	0.64161	0.245137	-2.61173	0.00900851	0.0168674		2195.04	-0.407812	0.753766	0.244563	-1.66751	0.095413	0.483019
B0496.5	srtx-1	4.40408	3.28189	5.39779	5.15335	12.3957	10.4699	12.3911	10.5306	12.4204	1.65564	5.38555	3.32748	7.68413	8.91468	10.7517	8.39384	11.3248	4.886	8.17137	5.6615	6.51526	1.07024	6.77012	4.18032		7.13073	1.09082	2.12995	0.555906	1.96224	0.0497344	0.0960972		7.13073	-1.68816	0.310323	0.636712	-2.65137	0.00801655	NA		7.13073	-0.15731	0.896695	0.520696	-0.302115	0.762564	0.944651
B0496.6	B0496.6	0.880817	0.820473	2.31334	0.858892	2.65622	0.872495	2.85948	1.91465	2.86625	1.65564	3.23133	0	4.80258	1.98104	2.93228	1.8653	5.14764	4.886	7.14995	1.1323	5.42939	3.21071	7.89848	2.09016		2.89397	0.0972868	1.06976	1.06808	0.0910859	0.927424	0.955423		2.89397	-0.635801	0.643583	1.04491	-0.608476	0.542872	NA		2.89397	0.278349	1.21281	0.828857	0.335823	0.737004	0.935423
B0496.8	tes-1	591.909	597.305	585.275	592.636	548.067	567.994	685.323	636.62	642.039	319.538	461.003	504.667	996.056	975.663	937.352	1149.96	877.158	947.884	1158.29	912.633	1042.44	1169.77	1201.7	1295.9		808.216	-0.0544147	0.962985	0.141852	-0.383602	0.701273	0.787437		808.216	-0.602245	0.658728	0.14543	-4.14114	3.45581e-05	0.000150376		808.216	0.0327721	1.02298	0.139559	0.234826	0.814343	0.962617
B0507.1	B0507.1	629.784	651.456	848.996	1058.16	1122.7	1070.55	869.283	996.573	813.058	380.796	704.43	732.045	938.425	1000.43	995.02	827.26	949.225	874.594	1247.15	981.704	1073.93	1054.18	1035.83	1156.9		917.187	0.609556	1.52579	0.179322	3.39923	0.000675759	0.00244503		917.187	-0.553199	0.681507	0.181631	-3.04572	0.00232121	0.00527849		917.187	-0.146362	0.903526	0.179596	-0.814948	0.415102	0.800147
B0507.2	B0507.2	873.77	793.398	663.929	853.739	847.335	860.28	1592.73	1644.68	1522.93	1751.66	1427.17	1469.64	1405.24	1478.85	1355.69	1586.44	1462.96	1487.3	1671.04	2183.07	1958.92	2080.54	2430.47	2091.2		1478.87	0.136681	1.09937	0.127281	1.07386	0.282888	0.394156		1478.87	-0.0362918	0.975158	0.125482	-0.28922	0.772413	0.810886		1478.87	0.0977852	1.07013	0.125236	0.780805	0.434917	0.812261
B0511.1	fkb-7	2586.08	1996.21	1471.28	1204.17	1169.62	1320.09	1529.82	1591.07	1377.71	632.453	945.703	1171.27	2343.66	2205.89	1971.47	3063.75	2587.2	2510.43	966.264	850.357	1111.94	1032.78	1262.63	1115.1		1584.04	-0.712388	0.610309	0.197355	-3.60968	0.00030657	0.00120093		1584.04	-0.707285	0.612472	0.198951	-3.55508	0.000377867	0.00114352		1584.04	0.323759	1.25159	0.196813	1.64501	0.0999678	0.488993
B0511.11	B0511.11	76.631	57.4331	40.869	56.6869	61.0931	58.4572	4.76581	3.82929	2.86625	18.212	5.38555	9.98243	0	2.97156	2.93228	1.8653	0	11.7264	0	1.1323	1.08588	1.07024	1.12835	3.13524		17.6358	0.0131559	1.00916	0.392705	0.0335008	0.973275	0.984659		17.6358	1.47936	2.78826	0.623786	2.37159	0.0177119	0.0303156		17.6358	1.22075	2.33067	0.793466	1.5385	0.123927	0.535616
B0511.12	B0511.12	1993.29	2851.15	3961.98	4081.46	3878.97	3988.18	3995.65	3629.21	3878.99	11597.7	6033.97	6288.93	5327.02	5786.62	6018.01	4159.62	5302.07	4500.01	2273.68	3078.72	2825.45	3029.84	3150.36	2784.09		4350.62	0.440049	1.35665	0.222268	1.97981	0.0477249	0.0927929		4350.62	1.0557	2.07873	0.222128	4.75268	2.00738e-06	1.30507e-05		4350.62	-0.295223	0.814946	0.222084	-1.32933	0.183738	0.612565
B0511.5	cutl-14	463.309	402.032	400.979	322.943	309.892	295.776	192.539	199.123	264.65	86.093	140.024	107.588	208.432	202.066	170.072	231.297	127.661	185.668	366.69	230.989	283.414	160.535	109.45	174.528		234.823	-0.447181	0.733475	0.215504	-2.07504	0.0379827	0.0764691		234.823	-0.96301	0.512986	0.23236	-4.14447	3.40596e-05	0.000148751		234.823	-0.0902449	0.939363	0.224433	-0.402102	0.687609	0.921002
B0511.6	B0511.6	5465.47	5159.14	3812.38	4003.3	3894.91	4033.55	4271.12	4317.53	4122.62	5549.69	4498.01	4700.61	3496.28	3769.92	3647.76	3822.93	3991.48	3663.52	2616.88	2948.51	2987.25	3676.26	4103.82	3649.42		4008.43	-0.274793	0.826569	0.123607	-2.22312	0.0262077	0.0562815		4008.43	0.213799	1.15974	0.123874	1.72594	0.0843574	0.119141		4008.43	0.0726761	1.05167	0.123982	0.586183	0.557752	0.87161
B0511.7	B0511.7	4512.42	3057.9	1835.25	1273.74	1251.08	1327.07	859.752	756.285	844.587	3403.99	1621.05	1555.04	1914.31	1869.11	2282.29	2118.98	2274.23	2150.82	897.829	1456.14	1132.57	1364.55	1694.79	1221.7		1778.14	-1.28781	0.409571	0.270854	-4.75465	1.98791e-06	1.38077e-05		1778.14	1.41779	2.67177	0.271885	5.21469	1.84124e-07	1.60827e-06		1778.14	0.109486	1.07884	0.270841	0.404245	0.686032	0.920988
B0511.8	mrps-30	773.357	831.14	766.487	691.408	741.086	708.466	1579.39	1687.76	1610.83	1991.73	1571.5	1742.49	4394.36	4149.29	4098.35	4388.11	4730.68	4765.81	1421.82	1407.45	1414.9	1073.45	1320.17	1181.99		2043.42	-0.147287	0.902947	0.105385	-1.39762	0.162227	0.25248		2043.42	0.118702	1.08576	0.102194	1.16154	0.245424	0.304014		2043.42	0.135195	1.09824	0.0992083	1.36274	0.172965	0.601075
B0513.2	thoc-7	4200.61	2492.6	1526.8	1099.38	968.635	1042.63	680.557	550.461	585.669	2071.2	946.78	973.841	455.285	319.938	329.393	491.506	394.309	387.948	297.233	423.48	427.836	395.988	547.252	390.86		916.675	-1.40176	0.378468	0.292157	-4.79796	1.60288e-06	1.1356e-05		916.675	1.1339	2.19451	0.293813	3.85927	0.000113729	0.000412692		916.675	0.205629	1.15319	0.296653	0.693161	0.488208	0.842807
B0513.4	B0513.4	19.378	14.7685	5.39779	6.87114	4.42704	5.23497	0	0	0	8.27818	5.38555	5.54579	8.64465	7.92416	4.88713	20.5183	18.5315	37.1336	4.08568	10.1907	4.34351	5.35118	15.797	18.8114		9.64607	-1.24459	0.422028	0.564679	-2.20407	0.0275197	0.0586587		9.64607	5.15108	35.5328	1.30071	3.9602	7.48865e-05	0.000291747		9.64607	1.82817	3.55086	0.535642	3.41304	0.000642419	0.0278516
B0513.5	prdh-1	74.8694	94.3544	164.247	72.1469	82.3429	68.0546	96.2693	102.434	108.917	51.3247	84.0146	75.4228	125.828	112.919	133.907	104.457	112.219	112.378	196.113	84.9225	137.906	88.8296	49.6476	83.6064		100.714	-0.587037	0.665709	0.282537	-2.07773	0.037734	0.0760714		100.714	-0.530425	0.692351	0.292192	-1.81533	0.069473	0.100381		100.714	-0.179872	0.882781	0.27962	-0.643274	0.520046	0.855909
B0513.9	vamp-8	17.6163	13.1276	11.5667	7.73003	3.54163	7.85246	0.953161	2.87197	4.77708	4.96691	0	4.43663	31.697	17.8294	31.2776	79.2752	43.2402	44.9512	50.0496	29.4398	32.5763	59.9332	39.4924	52.254		24.644	-1.13544	0.455196	0.467049	-2.4311	0.0150532	0.0354369		24.644	0.0190739	1.01331	0.7808	0.0244286	0.980511	0.98423		24.644	1.0534	2.07542	0.346433	3.0407	0.00236025	0.0691995
B0523.5	fli-1	1354.7	1801.76	2207.7	2701.22	2735.91	2717.82	3317	3387.01	3168.16	3468.56	2788.64	3175.52	2208.23	2288.1	2007.63	1902.6	2357.62	2151.79	616.938	760.905	782.917	728.831	821.442	722.15		2090.55	0.603895	1.51981	0.150781	4.0051	6.19901e-05	0.000292419		2090.55	-0.0662512	0.955117	0.150587	-0.439952	0.659972	0.714214		2090.55	-0.0206758	0.985771	0.151073	-0.136859	0.891142	0.980722
B0524.6	B0524.6	600.717	731.862	690.146	1083.06	1120.04	1074.91	1261.99	1120.07	1263.06	2597.69	1588.74	1693.69	478.337	547.758	511.194	429.019	473.583	504.235	1620.99	2229.5	1765.64	1680.27	1888.86	1743.19		1195.77	0.696233	1.62027	0.164544	4.23129	2.32353e-05	0.000122258		1195.77	0.687527	1.61052	0.163316	4.20981	2.55591e-05	0.000115802		1195.77	-0.128056	0.915064	0.168655	-0.759278	0.447686	0.820434
B0545.1	tpa-1	1334.44	1476.03	2211.55	3091.15	3316.73	3179.37	2412.45	2430.64	2129.62	1168.88	1802.01	1741.38	2345.58	2367.34	2182.59	2004.26	2017.87	2067.76	2215.46	1639.57	1737.4	1555.05	1326.94	1585.39		2055.81	0.932491	1.90857	0.177771	5.24546	1.55895e-07	1.39388e-06		2055.81	-0.563407	0.676702	0.178665	-3.15343	0.00161361	0.00390161		2055.81	-0.179244	0.883166	0.178049	-1.00672	0.314072	0.729501
B0545.3	scl-23	1.76163	0	2.31334	6.01224	1.77081	1.74499	17.1569	17.2318	14.3312	8.27818	10.7711	23.2923	27.855	27.7346	22.4808	24.2489	27.7973	42.9968	5.1071	0	3.25763	1.07024	2.25671	2.09016		12.1483	1.2228	2.33399	0.845015	1.44707	0.147878	0.234851		12.1483	-0.163151	0.893072	0.456564	-0.357346	0.720833	0.768251		12.1483	0.283152	1.21685	0.393901	0.71884	0.47224	0.833549
B0546.1	mai-2	11650.6	8525.54	4097.7	3038.76	3221.11	2918.5	1978.76	1831.36	2229.94	4816.24	2908.2	2795.08	1945.05	1777.98	2004.7	3305.31	2373.06	2454.73	1848.77	1919.25	1944.81	1861.14	2226.24	1994.01		3152.78	-1.40303	0.378135	0.250921	-5.59152	2.25096e-08	2.4268e-07		3152.78	0.799802	1.74086	0.251546	3.17955	0.00147503	0.00361548		3152.78	0.505898	1.42001	0.251591	2.01079	0.0443473	0.349732
B0546.2	otub-4	2378.2	2451.57	2280.18	2850.66	2833.3	3011.85	1318.22	1342.17	1389.17	4081.14	1911.87	2096.31	2108.33	2340.6	2706.49	2203.85	2688.1	2365.8	1480.04	2056.26	1822.1	2024.89	2140.49	1809.03		2237.11	0.290495	1.22306	0.203131	1.43009	0.152692	0.240906		2237.11	0.996524	1.99519	0.204041	4.88394	1.03987e-06	7.32725e-06		2237.11	0.0204307	1.01426	0.203413	0.100439	0.919996	0.986155
B0546.3	B0546.3	220.204	242.04	343.917	365.888	414.371	418.798	204.93	229.757	223.567	253.312	180.955	201.867	305.444	393.237	385.106	332.956	437.549	426.059	521.946	591.06	514.706	534.048	516.786	488.052		364.44	0.570586	1.48513	0.169967	3.35705	0.000787797	0.002796		364.44	-0.0594215	0.959649	0.180131	-0.32988	0.741491	0.784417		364.44	0.14233	1.10369	0.169795	0.838244	0.401893	0.79189
B0546.4	B0546.4	1677.07	1129.79	957.723	1280.61	1214.78	1246.8	165.85	230.715	189.172	147.352	202.497	171.92	731.913	712.184	710.589	887.882	714.492	751.467	195.091	164.183	147.679	177.659	189.563	188.114		591.046	-0.00805826	0.99443	0.177171	-0.045483	0.963722	0.976854		591.046	-0.158731	0.895813	0.197156	-0.8051	0.420762	0.486228		591.046	0.127805	1.09263	0.179604	0.711593	0.476717	0.836652
B0547.1	csn-5	2301.57	1839.5	1189.06	1363.06	1394.52	1337.54	1205.75	1116.24	1238.22	3836.11	2007.73	2063.03	99.8937	117.872	102.63	114.716	141.045	106.515	1657.77	2480.87	2472.54	2352.38	2933.72	2366.06		1493.26	-0.380039	0.768417	0.235386	-1.61453	0.106412	0.179991		1493.26	1.14997	2.2191	0.235663	4.87972	1.06236e-06	7.46369e-06		1493.26	0.176543	1.13017	0.258099	0.684013	0.493967	0.845684
B0563.1	B0563.1	225.489	142.762	94.8469	66.9936	71.718	61.0747	106.754	67.0126	104.14	451.988	229.425	235.142	22.0919	23.7725	19.5485	51.2957	43.2402	37.1336	35.7497	182.3	122.704	154.114	173.766	129.59		118.861	-1.21143	0.431841	0.375204	-3.22872	0.00124347	0.00414064		118.861	1.71717	3.28792	0.37155	4.62165	3.80692e-06	2.28768e-05		118.861	1.01023	2.01423	0.417756	2.41822	0.0155965	0.218323
B0563.10	B0563.10	0	0	0	0	0	0	8.57845	2.87197	7.64332	8.27818	7.53977	9.98243	1.92103	1.98104	0	3.7306	3.08858	1.9544	3.06426	3.3969	2.17175	6.42142	9.02683	6.27048		3.66339	0	1	1.72719	0	1	1		3.66339	0.436514	1.35333	0.642813	0.679069	0.497094	NA		3.66339	1.17169	2.25275	0.979841	1.19579	0.231777	0.662763
B0563.2	tsp-11	342.638	318.344	431.823	535.09	572.858	636.049	562.365	599.284	537.899	245.034	428.69	499.121	1239.07	1150.98	1129.9	1356.07	1424.87	1414.99	465.768	364.6	449.553	402.409	450.213	380.409		664.085	0.673625	1.59508	0.180663	3.72863	0.000192522	0.000797423		664.085	-0.525206	0.69486	0.182877	-2.8719	0.0040801	0.00855408		664.085	0.253374	1.19199	0.176331	1.43692	0.150742	0.57051
B0563.4	tmbi-4	1315.06	1138	926.878	1698.89	1691.13	1589.69	1451.66	1647.55	1388.22	1715.24	1543.5	1472.96	408.219	438.801	376.309	495.237	503.439	548.209	1428.97	1479.92	1496.34	1625.69	1620.32	1482.97		1228.47	0.559804	1.47407	0.1225	4.56982	4.8815e-06	3.08453e-05		1228.47	0.0751437	1.05347	0.123042	0.610718	0.541386	0.602055		1228.47	0.338602	1.26453	0.130817	2.58838	0.00964298	0.167319
B0563.5	B0563.5	9.68898	4.92284	0.771113	3.43557	5.31244	3.48998	26.6885	30.6343	23.8854	3.31127	16.1567	15.5282	41.3022	33.6777	43.9842	48.4978	45.2992	55.7004	13.2785	10.1907	17.374	9.63213	3.38506	7.31556		19.7276	-0.289299	0.8183	0.576624	-0.501712	0.61587	0.716637		19.7276	-1.12417	0.458766	0.404204	-2.78119	0.00541597	0.01087		19.7276	0.329643	1.2567	0.316131	1.04274	0.297067	0.717341
B0563.6	B0563.6	56.3723	61.5355	107.185	92.7604	105.363	118.659	54.3302	49.7808	45.8599	46.3578	38.776	25.5106	69.1572	69.3364	81.1264	71.814	62.8012	81.1076	160.363	114.362	121.618	98.4618	54.161	93.0121		78.3255	0.487835	1.40234	0.250344	1.94866	0.0513359	0.0987301		78.3255	-0.462952	0.7255	0.294308	-1.57302	0.115715	0.157422		78.3255	-0.0249169	0.982877	0.260856	-0.0955199	0.923902	0.988239
B0563.8	B0563.8	356.731	197.734	118.751	60.9813	80.572	78.5246	0	0	1.91083	0	2.15422	0	53.7889	64.3838	53.7585	114.716	82.3622	78.176	0	4.5292	0	1.07024	2.25671	1.04508		56.3936	-1.61167	0.327219	0.333152	-4.83764	1.31392e-06	9.52e-06		56.3936	0.36042	1.2838	1.47817	0.243828	0.807364	0.841765		56.3936	0.680227	1.60239	0.345557	1.96849	0.0490114	0.3579
B0563.9	B0563.9	0.880817	0.820473	0.771113	0	0	0	1.90632	1.91465	2.86625	1.65564	2.15422	0	0	0	0	0	1.02953	0	2.04284	3.3969	3.25763	2.14047	9.02683	4.18032		1.58517	-2.3578	0.195088	1.61094	-1.46362	0.143299	NA		1.58517	-0.845445	0.556539	1.22753	-0.688738	0.490988	NA		1.58517	0.9661	1.95355	1.81354	0.532715	0.594231	0.884709
B0564.10	unc-30	387.559	403.673	454.186	629.568	746.398	662.224	792.077	730.437	840.765	1153.98	901.542	1029.3	378.443	397.199	360.67	391.713	358.276	303.909	651.666	997.556	778.574	835.855	946.689	914.445		668.613	0.709972	1.63577	0.152205	4.66457	3.09265e-06	2.05229e-05		668.613	0.382377	1.30349	0.150344	2.54335	0.0109794	0.0200276		668.613	-0.108261	0.927706	0.156912	-0.689947	0.490228	0.843727
BE0003N10.1	BE0003N10.1	251.914	312.6	361.652	312.637	335.569	284.433	223.993	250.819	217.835	180.464	199.265	189.666	368.838	399.18	395.858	357.205	366.512	358.632	567.91	671.454	699.305	478.396	600.284	491.187		369.817	0.00792665	1.00551	0.144599	0.0548182	0.956283	0.972893		369.817	-0.279055	0.824131	0.156801	-1.77968	0.0751284	0.107703		369.817	-0.104782	0.929945	0.144025	-0.727531	0.466901	0.829987
BE0003N10.3	BE0003N10.3	554.034	631.765	734.871	773.003	758.794	719.808	1068.49	1171.76	992.676	531.459	735.667	935.021	730.953	799.35	752.618	623.01	750.526	682.086	2150.09	1845.65	2006.7	1728.43	1943.03	1635.55		1052.31	0.228732	1.1718	0.160456	1.42552	0.154007	0.242622		1052.31	-0.548846	0.683567	0.160822	-3.41276	0.000643092	0.0017865		1052.31	-0.1516	0.900252	0.161026	-0.941461	0.346469	0.756014
BE10.2	agmo-1	864.081	959.133	1305.49	1606.99	1514.05	1484.11	1250.55	1337.38	1122.61	442.055	804.602	819.668	892.32	949.909	908.029	960.629	953.343	1017.27	1215.49	816.388	869.788	690.303	506.631	721.105		1000.5	0.557339	1.47155	0.203839	2.73422	0.0062529	0.0169208		1000.5	-0.840108	0.558602	0.205977	-4.07865	4.52975e-05	0.000189048		1000.5	0.091967	1.06582	0.205042	0.448527	0.653773	0.909658
BE10.4	BE10.4	59.0147	36.9213	40.869	18.8956	34.5309	37.5173	72.4403	44.9942	58.2803	29.8014	53.8555	25.5106	48.9863	43.5829	43.0068	45.6998	40.1516	56.6776	30.6426	26.0429	27.1469	46.0202	21.4387	50.1638		41.3413	-0.586947	0.66575	0.318958	-1.8402	0.0657386	0.120962		41.3413	-0.669921	0.628541	0.322859	-2.07496	0.0379898	0.0588673		41.3413	0.0727719	1.05174	0.313796	0.231908	0.81661	0.963319
C01A2.2	C01A2.2	751.337	516.898	342.374	367.606	341.767	323.696	241.15	229.757	275.16	134.106	239.119	234.032	414.943	384.322	318.641	489.641	427.254	461.239	391.204	236.651	276.899	302.877	293.372	308.299		345.931	-0.639662	0.641863	0.233254	-2.74234	0.0061003	0.016544		345.931	-0.28692	0.81965	0.242037	-1.18544	0.235843	0.293367		345.931	0.302043	1.23289	0.234268	1.28931	0.197291	0.625166
C01A2.5	tads-1	5392.36	3723.31	2068.13	1545.15	1410.45	1498.95	1172.39	1121.03	1175.16	3627.5	1794.47	1909.97	2895.96	2614.97	2669.35	3213.91	3094.76	2851.47	1464.72	1980.39	1728.72	2233.58	2469.97	2029.54		2320.26	-1.32791	0.398344	0.252055	-5.26835	1.37659e-07	1.2458e-06		2320.26	1.07868	2.1121	0.252799	4.26694	1.98175e-05	9.32779e-05		2320.26	0.163219	1.11978	0.251876	0.64801	0.516978	0.855093
C01A2.7	nlp-38	198.184	164.915	112.583	222.453	224.008	231.211	27.6417	21.0611	26.7516	1.65564	20.4651	12.2007	220.919	195.133	236.537	242.489	232.673	269.707	280.891	206.078	207.403	251.506	197.462	241.413		168.556	0.513566	1.42757	0.201716	2.54599	0.010897	0.0269759		168.556	-1.00802	0.497228	0.359976	-2.80024	0.00510639	0.0103387		168.556	0.190842	1.14143	0.200621	0.951259	0.341473	0.751759
C01B10.11	C01B10.11	3453.68	3080.06	3256.41	4191.39	4149.02	4288.31	5848.6	6065.6	5332.17	2572.86	4272.9	4122.74	4864.06	5231.93	4989.76	4052.36	4256.07	4351.47	3422.78	2746.96	2904.72	2634.92	2523	2695.26		3971.13	0.367342	1.28997	0.145101	2.53164	0.0113531	0.0279858		3971.13	-0.651494	0.636621	0.145234	-4.48581	7.26368e-06	3.97085e-05		3971.13	-0.25293	0.839191	0.145021	-1.7441	0.0811425	0.453001
C01B10.3	C01B10.3	36.9943	22.1528	40.0979	23.1901	22.1352	19.1949	72.4403	44.9942	50.637	56.2916	37.6989	41.0389	110.459	91.1279	91.8781	78.3425	66.9193	86.9708	64.3495	52.0858	61.895	66.3547	78.9848	73.1556		57.8912	-0.622166	0.649695	0.280866	-2.21517	0.0267485	0.0572941		57.8912	-0.343314	0.788229	0.254988	-1.34639	0.178177	0.229548		57.8912	-0.336796	0.791798	0.221811	-1.51839	0.128917	0.541167
C01B10.6	C01B10.6	638.592	632.585	983.941	1717.78	1723.89	1679.55	768.248	812.767	764.332	413.909	780.905	592.291	2169.81	2358.43	2544.24	2212.24	2367.91	2400.98	1497.4	1054.17	1073.93	1235.05	889.143	1217.52		1355.4	1.18276	2.27011	0.20208	5.85293	4.82995e-09	6.04882e-08		1355.4	-0.387603	0.764399	0.205066	-1.89014	0.0587392	0.0864631		1355.4	-0.0187658	0.987077	0.200751	-0.0934778	0.925524	0.989007
C01B10.8	C01B10.8	815.636	895.957	752.607	724.905	748.169	708.466	691.042	678.742	815.925	2372.53	1207.44	1250.02	400.535	412.057	397.813	346.945	397.398	388.926	726.23	1050.77	696.047	801.607	899.298	816.207		791.47	-0.175708	0.885333	0.203037	-0.865398	0.38682	0.504658		791.47	1.14121	2.20566	0.202874	5.62523	1.85265e-08	2.22473e-07		791.47	-0.095243	0.936115	0.207783	-0.458376	0.646682	0.906239
C01B10.9	C01B10.9	794.497	793.398	645.422	537.666	525.046	509.537	908.363	793.621	890.447	4428.82	1828.93	1970.97	701.177	668.601	791.715	582.906	682.577	610.75	847.779	1241	943.627	1022.08	1193.8	1033.58		1039.43	-0.506175	0.704087	0.234418	-2.15928	0.0308286	0.0642753		1039.43	1.66479	3.17068	0.232638	7.15615	8.2975e-13	5.11083e-11		1039.43	-0.204349	0.86793	0.23464	-0.870902	0.383808	0.782111
C01B7.1	sup-37	2461	3601.88	5237.4	4731.64	4923.75	4634.69	4948.81	5299.74	4943.32	5653.99	4381.69	5412.69	3545.27	3633.23	3223.55	3112.25	3300.67	3192.51	3359.45	3659.59	3649.63	3109.04	3624.27	3224.07		4036.01	0.338431	1.26438	0.179137	1.88923	0.0588608	0.110796		4036.01	0.023921	1.01672	0.179206	0.133484	0.893811	0.914415		4036.01	-0.114962	0.923406	0.179496	-0.640473	0.521865	0.85613
C01C10.2	C01C10.2	135.646	140.301	108.727	179.508	183.279	167.519	174.429	201.995	156.688	94.3712	213.268	168.592	113.341	99.0521	129.998	200.52	133.839	152.443	118.485	84.9225	105.33	114.515	108.322	119.139		141.843	0.464352	1.3797	0.218428	2.12588	0.0335135	0.0689456		141.843	-0.144441	0.90473	0.221435	-0.652299	0.514209	0.576238		141.843	0.509185	1.42325	0.22348	2.27844	0.0227005	0.263077
C01C10.3	acl-12	473.879	450.44	427.197	913.002	880.095	946.657	1939.68	2084.09	1922.3	1708.62	1739.53	1901.1	1270.76	1290.65	1101.56	1329.96	1565.91	1537.14	916.214	985.1	1216.18	1168.7	1206.21	1134.96		1254.58	1.02006	2.02801	0.119134	8.56228	1.10652e-17	8.94721e-16		1254.58	-0.151983	0.900012	0.114421	-1.32828	0.184085	0.236223		1254.58	0.275013	1.21001	0.115222	2.38682	0.0169948	0.227407
C01C10.4	clc-5	849.107	655.558	579.106	836.561	753.481	799.206	1236.25	1297.17	1134.08	730.135	1162.2	1132.45	1534.91	1591.77	1473.96	2087.27	1681.22	1693.49	1523.96	1370.08	1516.97	1440.54	1647.4	1386.82		1254.74	0.198163	1.14724	0.165027	1.20079	0.229831	0.334059		1254.74	-0.274252	0.826879	0.164527	-1.66691	0.0955326	0.132979		1254.74	0.247745	1.18735	0.162682	1.52288	0.127789	0.539054
C01C4.1	nlp-1	39.6367	35.2804	29.3023	35.2146	23.0206	20.0674	16.2037	13.4025	11.465	6.62254	6.46266	8.87327	76.8413	55.4691	68.4198	69.9487	62.8012	85.9936	27.5784	13.5876	21.7175	20.3345	25.9521	19.8565		33.0855	-0.406688	0.754353	0.290172	-1.40154	0.161052	0.251231		33.0855	-0.890572	0.5394	0.457582	-1.94626	0.0516241	0.0769568		33.0855	0.124021	1.08977	0.252962	0.490274	0.62394	0.896368
C01C4.2	C01C4.2	3.52327	1.64095	4.62668	6.87114	8.85407	6.10747	6.67213	6.70126	1.91083	1.65564	4.30844	3.32748	10.5657	17.8294	18.5711	13.0571	10.2953	6.8404	4.08568	4.5292	3.25763	2.14047	2.25671	7.31556		6.53931	1.14873	2.21719	0.626015	1.83499	0.0665078	0.122101		6.53931	-0.647331	0.638461	0.727679	-0.889583	0.37369	NA		6.53931	-0.632959	0.644852	0.495351	-1.2778	0.201321	0.631436
C01C4.3	C01C4.3	74.8694	99.2773	133.403	170.061	170.884	147.452	219.227	258.477	218.79	105.961	174.492	177.465	121.986	129.758	149.546	127.773	113.248	121.173	258.419	187.962	182.427	209.766	136.531	222.602		162.981	0.663403	1.58381	0.225609	2.9405	0.00327683	0.00967316		162.981	-0.591507	0.663649	0.224037	-2.64023	0.00828506	0.015702		162.981	-0.147167	0.903022	0.228719	-0.643441	0.519938	0.855909
C01C7.1	ark-1	1579.3	2054.47	3186.24	3618.51	3848.86	3628.71	3920.35	3891.52	3965.93	9745.07	4799.61	5503.64	181.538	217.915	206.237	162.281	173.99	209.121	4604.56	4597.14	4512.91	3731.91	3949.24	3869.93		3173.29	0.701975	1.62673	0.222016	3.16182	0.00156786	0.00508205		3173.29	0.766884	1.70159	0.221761	3.45816	0.000543879	0.00154883		3173.29	-0.151289	0.900446	0.236579	-0.639486	0.522507	0.85613
C01F1.3	rml-4	1605.73	1783.71	1584.64	1822.57	1841.65	1812.17	2265.66	2720.71	2207.96	1365.9	1688.91	2091.87	3243.66	3156.79	2778.82	3753.91	3408.77	3238.44	1002.01	1038.32	1177.09	1026.36	1279.55	1046.12		2039.22	0.138799	1.10099	0.14429	0.961951	0.336074	0.45209		2039.22	-0.481198	0.716382	0.144692	-3.32569	0.000882014	0.00234188		2039.22	0.180323	1.13314	0.14339	1.25758	0.208545	0.642139
C01F1.6	C01F1.6	1243.71	1343.94	1198.31	1180.12	1226.29	1268.61	1469.77	1342.17	1550.64	5208.63	2414.88	2434.6	1908.55	1763.13	2141.54	1931.52	2331.88	2158.64	1482.08	2155.9	1829.7	1945.69	2173.21	1763.05		1894.44	-0.0428963	0.970704	0.216168	-0.19844	0.842701	0.893743		1894.44	1.20377	2.3034	0.215644	5.58219	2.37508e-08	2.72829e-07		1894.44	0.143626	1.10468	0.215519	0.666421	0.505142	0.849031
C01F4.2	rga-6	118.91	128.814	236.732	244.784	225.779	191.076	297.386	245.075	276.115	243.378	219.731	266.198	247.813	238.715	232.627	207.048	228.555	266.776	113.378	54.3504	92.2995	87.7594	50.7759	74.2007		191.178	0.446996	1.3632	0.24019	1.86101	0.0627431	0.11657		191.178	-0.166785	0.890825	0.23975	-0.695665	0.486639	0.550425		191.178	-0.0342823	0.976517	0.239047	-0.143413	0.885964	0.979428
C01F6.2	C01F6.2	76.631	74.6631	48.5801	31.779	30.1038	29.6648	5.71897	5.74394	1.91083	6.62254	5.38555	2.21832	656.993	690.393	920.736	642.595	891.571	736.809	59.2424	79.261	65.1526	96.3213	98.1668	85.6965		222.582	-1.12189	0.45949	0.25087	-4.472	7.74902e-06	4.56052e-05		222.582	0.0246093	1.0172	0.610145	0.0403335	0.967827	0.974648		222.582	0.00145096	1.00101	0.190535	0.00761521	0.993924	1
C01F6.4	fem-3	916.049	837.703	671.64	588.341	551.609	576.719	512.801	487.277	473.886	1589.41	803.525	700.988	331.378	323.9	364.58	312.437	377.837	367.427	602.638	1041.72	579.858	892.577	1043.73	864.281		658.846	-0.498353	0.707914	0.240124	-2.0754	0.0379499	0.0764478		658.846	1.06634	2.09411	0.241052	4.42367	9.70394e-06	5.09065e-05		658.846	0.0522777	1.0369	0.244572	0.213752	0.83074	0.966843
C01F6.9	znf-706	8702.47	6393.13	3737.59	3931.15	3580.59	3508.3	3396.11	3204.16	3623.89	9713.61	5584.82	4546.44	2736.51	2669.45	2627.32	3115.05	3377.88	3029.32	3737.38	5192.72	4318.53	5266.63	6163.07	5050.87		4466.96	-0.773065	0.585173	0.242062	-3.19367	0.00140478	0.00461174		4466.96	0.956334	1.94037	0.242213	3.94832	7.87006e-05	0.000304119		4466.96	0.245296	1.18534	0.242498	1.01154	0.31176	0.727497
C01G10.10	C01G10.10	485.33	437.312	314.614	246.502	261.195	239.936	116.286	130.196	99.3632	253.312	152.95	155.282	142.156	127.777	118.269	142.695	157.518	150.489	86.8208	112.098	84.6984	81.338	144.429	129.59		182.09	-0.725937	0.604604	0.208847	-3.47592	0.000509105	0.00189362		182.09	0.685129	1.60785	0.22429	3.05466	0.00225315	0.00514667		182.09	0.214743	1.1605	0.22262	0.964619	0.334735	0.745516
C01G10.11	unc-76	2823.9	2849.5	3100.65	4638.88	4858.23	4378.18	2646.93	2805.91	2586.31	3589.42	2670.16	2694.15	2333.09	2353.48	2265.67	2013.59	2260.84	2244.63	3802.75	3411.62	3371.65	3308.1	3247.4	3356.8		3067.16	0.661102	1.58129	0.110612	5.97678	2.27594e-09	3.08954e-08		3067.16	0.153416	1.1122	0.111595	1.37475	0.169208	0.219418		3067.16	-0.0929446	0.937607	0.111865	-0.830866	0.406049	0.795165
C01G10.12	dnj-3	265.126	199.375	92.5336	60.1224	67.2909	70.6721	156.318	145.513	160.51	195.365	116.328	159.719	192.103	157.493	171.05	234.095	193.551	216.938	106.228	149.464	128.133	162.676	270.805	189.159		160.857	-1.48924	0.356199	0.277119	-5.37402	7.69996e-08	7.42932e-07		160.857	0.0202085	1.01411	0.272937	0.074041	0.940978	0.952982		160.857	0.308309	1.23826	0.267599	1.15213	0.249267	0.677199
C01G10.16	txt-12	9.68898	4.92284	3.08445	6.01224	2.65622	6.97996	9.53161	5.74394	6.68791	0	3.23133	3.32748	55.71	39.6208	45.939	50.3631	41.1811	54.7232	3.06426	1.1323	3.25763	3.21071	1.12835	2.09016		15.137	-0.147519	0.902802	0.537083	-0.274666	0.783573	0.849717		15.137	-1.58421	0.333507	0.718311	-2.20547	0.0274214	0.0442971		15.137	0.0507168	1.03578	0.320187	0.158398	0.874144	0.976793
C01G10.7	C01G10.7	468.594	360.188	182.754	127.975	133.696	132.619	290.714	237.416	335.351	915.566	499.779	472.502	352.51	342.72	379.241	384.251	357.246	336.157	218.584	278.546	212.832	226.89	226.799	246.639		321.649	-1.35786	0.390161	0.261137	-5.19979	1.99509e-07	1.76265e-06		321.649	1.12432	2.17999	0.256138	4.38951	1.13608e-05	5.82564e-05		321.649	0.00435585	1.00302	0.256269	0.0169972	0.986439	1
C01G10.8	ahsa-1	8036.57	5953.36	3202.43	2399.74	2314.45	2368.82	1225.77	1105.71	1290.77	2549.68	1512.26	1518.44	2530.96	2387.15	2641.98	2669.24	2506.9	2137.14	1852.86	2162.69	2018.65	2129.77	2520.74	2081.8		2546.58	-1.27923	0.412016	0.230878	-5.54072	3.01238e-08	3.19673e-07		2546.58	0.622093	1.53911	0.232325	2.67768	0.00741338	0.0142619		2546.58	-0.0478763	0.967359	0.231292	-0.206995	0.836014	0.966843
C01G10.9	C01G10.9	999.727	783.552	512.79	419.139	385.152	433.63	528.051	482.491	497.771	562.916	439.461	506.885	350.588	334.796	271.725	367.464	437.549	346.906	243.098	309.118	357.254	285.753	372.357	353.237		440.892	-0.890415	0.539459	0.198096	-4.49487	6.96109e-06	4.17947e-05		440.892	-0.0013359	0.999074	0.200271	-0.00667047	0.994678	0.996491		440.892	0.266838	1.20317	0.20229	1.31909	0.18714	0.614532
C01G12.1	madf-5	854.392	825.396	1065.68	1336.44	1365.3	1330.56	657.681	741.925	580.892	238.412	357.601	468.065	945.148	1126.22	1138.7	1083.74	1102.62	1094.46	437.168	301.192	388.744	272.91	289.987	319.794		763.459	0.554269	1.46842	0.17918	3.09336	0.00197904	0.00624877		763.459	-0.887168	0.540675	0.185767	-4.7757	1.79086e-06	1.17716e-05		763.459	0.0314896	1.02207	0.179681	0.175253	0.860881	0.97253
C01G12.16	C01G12.16	14.0931	9.84568	3.08445	6.87114	6.19785	5.23497	0	0	0	0	0	0	5.7631	12.8768	8.79684	26.1142	21.6201	26.3844	1.02142	0	0	1.07024	0	0		6.20726	-0.545403	0.6852	0.58684	-0.92939	0.352687	0.469681		6.20726	0	1	1.71937	0	1	NA		6.20726	1.43734	2.70821	0.531772	2.70292	0.00687327	0.137098
C01G12.3	C01G12.3	626.261	502.95	229.021	144.294	143.436	123.894	16.2037	20.1038	17.1975	9.93381	24.7735	14.4191	7.68413	2.97156	6.84198	0.932649	1.02953	6.8404	0	0	0	1.07024	4.51341	1.04508		79.3923	-1.72165	0.303203	0.326112	-5.2793	1.29678e-07	1.17851e-06		79.3923	-0.0818673	0.944834	0.435304	-0.188069	0.850822	0.87911		79.3923	-0.994812	0.501801	0.669143	-1.4867	0.137095	0.555691
C01G12.7	C01G12.7	28.1861	7.38426	16.1934	47.2391	37.1871	28.7923	74.3466	59.354	72.6116	31.4571	70.0122	58.7854	97.0122	121.834	103.607	99.7935	95.7461	108.469	142.999	98.51	105.33	113.445	85.7549	87.7867		74.6599	1.14308	2.20851	0.318188	3.59246	0.000327577	0.00127584		74.6599	-0.332627	0.794089	0.278355	-1.19498	0.232096	0.289412		74.6599	-0.0844311	0.943156	0.254632	-0.331581	0.740206	0.936272
C01G12.8	catp-4	1.76163	0.820473	9.25336	6.87114	12.3957	13.0874	0.953161	0	1.91083	0	1.07711	0	48.9863	48.5355	53.7585	30.7774	37.063	48.86	1.02142	2.2646	2.17175	4.28095	0	2.09016		13.6642	1.40717	2.65216	0.555949	2.53112	0.0113701	0.0280165		13.6642	-1.0868	0.470804	1.48114	-0.733762	0.463094	0.527804		13.6642	-0.375227	0.770984	0.378557	-0.991202	0.321587	0.735209
C01G6.1	aqp-2	27139.7	29711	34618.4	70630.1	82973.3	77063.1	97234.9	111980	97782	57111.1	82445.3	82668.9	92483.3	112712	97539.3	82324	103318	103453	153500	146721	160573	142655	155076	140652		97598.6	1.33444	2.52177	0.147271	9.06112	1.29115e-19	1.60081e-17		97598.6	-0.466147	0.723895	0.147243	-3.16583	0.0015464	0.00376715		97598.6	-0.0665114	0.954944	0.147227	-0.451761	0.651442	0.908312
C01G6.3	C01G6.3	23110.9	19531.4	13887.8	17700	17582.4	17814.6	19969.7	20373.7	20752.6	28968.7	20607.3	24475.8	22378.1	21295.2	20023.6	20050.1	22482.8	20469.4	5841.51	12882.2	12016.3	12480	15314	12140.7		18422.9	-0.090364	0.939286	0.217106	-0.41622	0.677249	0.768699		18422.9	0.277398	1.21201	0.217115	1.27765	0.201372	0.255742		18422.9	-0.0158216	0.989093	0.217106	-0.072875	0.941906	0.994413
C01G6.4	C01G6.4	2182.66	1730.38	1549.94	2081.1	2115.24	2212.65	2579.25	2572.33	2701.91	2870.87	2618.46	2710.78	1833.63	1652.19	1549.22	2271.93	1981.84	1902.61	1173.61	1405.18	1269.39	1349.57	1554.87	1277.09		1964.45	0.230829	1.17351	0.128822	1.79184	0.0731586	0.132062		1964.45	0.0618877	1.04383	0.128746	0.480695	0.630733	0.686562		1964.45	0.290168	1.22278	0.129354	2.2432	0.0248839	0.272815
C01G6.5	C01G6.5	3451.04	4490.45	6766.52	7791.01	8810.69	8793.88	4815.37	4152.87	4984.4	12165.6	5678.53	6717.06	4308.88	4537.57	5613.36	3945.11	4576.25	3673.3	4872.18	6714.54	5566.21	6591.59	6864.9	6072.96		5914.76	0.787884	1.72654	0.236238	3.33512	0.000852625	0.00299183		5914.76	0.81544	1.75983	0.236372	3.44982	0.000560955	0.00158608		5914.76	-0.245821	0.843336	0.236491	-1.03945	0.298597	0.718552
C01G6.6	mtrr-1	1139.78	1114.2	980.085	850.303	857.074	851.555	2018.8	2004.63	1833.44	1875.83	1437.94	1527.31	1108.44	1127.21	1196.37	816.068	868.922	759.285	2961.1	2205.72	3905.9	1314.25	1396.9	1311.58		1477.61	-0.337611	0.79135	0.158078	-2.13572	0.032702	0.0675562		1477.61	-0.276327	0.82569	0.156966	-1.76042	0.0783363	0.111786		1477.61	-0.489753	0.712147	0.158667	-3.08667	0.00202409	0.0629376
C01G6.7	acs-7	548.749	550.538	471.921	851.162	871.241	925.717	138.208	127.324	128.981	96.0269	128.176	115.352	276.629	302.109	262.928	218.24	245.028	216.938	332.983	247.974	237.807	325.352	226.799	298.893		339.378	0.753531	1.68591	0.14743	5.11112	3.20255e-07	2.68286e-06		339.378	-0.202999	0.868743	0.180658	-1.12366	0.261156	0.320446		339.378	-0.307821	0.807861	0.159282	-1.93256	0.0532905	0.373674
C01G6.8	cam-1	5089.36	6385.75	7761.26	8816.53	8723.03	8642.94	7824.5	8078.85	7983.45	14082.8	8985.26	10014.6	13070.7	14034.7	12979.2	11129.3	14183.8	12944	12035.4	13662.3	14240.2	13199.2	13844.9	12455.3		10840.3	0.444674	1.36101	0.159314	2.79118	0.00525166	0.0145447		10840.3	0.469488	1.38462	0.159331	2.94663	0.00321261	0.00695789		10840.3	-0.0673436	0.954394	0.159143	-0.423165	0.672175	0.915582
C01G6.9	C01G6.9	794.497	598.946	508.164	613.249	618.014	670.949	678.651	765.858	658.281	306.293	536.401	523.523	466.811	427.905	396.835	565.185	405.634	463.193	1054.11	712.216	753.599	689.232	652.188	753.502		608.885	0.00111351	1.00077	0.200621	0.00555031	0.995572	0.998929		608.885	-0.615839	0.65255	0.203157	-3.03135	0.00243465	0.00548929		608.885	0.15144	1.11068	0.203437	0.744406	0.456631	0.824675
C01G8.2	cln-3.2	446.574	437.312	333.892	328.956	316.976	354.233	228.759	283.368	266.561	475.167	303.745	263.98	823.163	851.848	945.171	865.498	950.254	951.793	191.006	249.106	232.378	272.91	299.014	279.036		456.279	-0.283184	0.821776	0.175572	-1.61292	0.106762	0.180419		456.279	0.409656	1.32837	0.180873	2.26489	0.0235197	0.0387655		456.279	0.0788497	1.05618	0.170628	0.462115	0.643999	0.905066
C01G8.5	erm-1	5078.79	5727.73	6720.25	9603.27	10449.6	9777.18	7959.85	8332.54	7568.8	8001.69	7496.69	8190.03	5301.09	6014.44	6422.67	4791.02	5714.91	5446.91	7040.65	7313.52	6677.06	7476.67	7030.77	7203.73		7139.16	0.76706	1.7018	0.11165	6.87022	6.41045e-12	1.52356e-10		7139.16	-0.0105445	0.992718	0.111816	-0.0943026	0.924869	0.939986		7139.16	-0.153111	0.899309	0.112024	-1.36677	0.171696	0.600021
C01G8.6	hpo-32	195.541	169.018	139.572	135.705	139.894	164.029	295.48	206.782	346.816	1149.01	495.471	531.287	487.942	553.701	763.37	568.916	777.294	747.558	567.91	973.777	658.041	648.563	884.629	687.662		511.999	-0.196639	0.872581	0.285508	-0.688733	0.490991	0.603816		511.999	1.35357	2.55545	0.278478	4.86062	1.17017e-06	8.10159e-06		511.999	0.213945	1.15986	0.275828	0.775645	0.437959	0.814011
C01G8.9	let-526	6394.73	10487.3	19177.6	22058.1	22235.2	20696.5	21313.6	21416.3	20708.6	23569.6	17090.5	21927	17459.3	18098.8	14744.5	14752.6	15161.9	11534.9	7208.17	8753.81	9713.17	10806.2	9735.44	9248.96		15595.5	0.849775	1.80222	0.243895	3.48418	0.000493649	0.00184535		15595.5	-0.019536	0.98655	0.243892	-0.080101	0.936157	0.949041		15595.5	-0.279283	0.824	0.243924	-1.14496	0.252226	0.68198
C01H6.1	col-61	22.9012	14.7685	26.2179	18.8956	21.2498	22.6849	24.7822	19.1465	26.7516	1.65564	18.3109	18.8557	15.3683	18.8199	14.6614	29.8448	15.4429	31.2704	83.7565	49.8212	66.2385	56.7225	33.8506	57.4794		29.5624	-0.0262656	0.981959	0.357948	-0.0733781	0.941505	0.964453		29.5624	-0.760977	0.590097	0.403574	-1.8856	0.0593495	0.0871997		29.5624	0.654785	1.57438	0.374924	1.74645	0.080733	0.452192
C01H6.5	nhr-23	921.334	1130.61	1347.13	1998.64	2147.11	2207.41	1845.32	2009.42	1644.27	2620.87	1684.6	2031.98	2294.67	2475.31	2696.72	1855.97	2664.42	2425.41	1292.1	1251.19	1464.85	1287.49	1347.25	1144.36		1824.52	0.901908	1.86854	0.170842	5.2792	1.29748e-07	1.17851e-06		1824.52	0.203245	1.15129	0.170818	1.18983	0.234111	0.291517		1824.52	-0.104485	0.930137	0.170184	-0.613956	0.539244	0.86275
C01H6.9	hasp-1	1283.35	1472.75	1304.72	1237.66	1156.34	1293.91	939.817	926.689	1004.14	1516.56	966.168	1108.05	608.007	582.426	615.779	536.273	611.54	485.669	883.529	1599.94	1376.89	1548.63	1753.46	1462.07		1094.77	-0.138973	0.908166	0.180753	-0.768852	0.441981	0.557933		1094.77	0.320379	1.24866	0.182187	1.75852	0.0786592	0.112135		1094.77	-0.14529	0.904197	0.184744	-0.786439	0.431611	0.810551
C02A12.1	gst-33	7.04653	4.92284	10.0245	4.29446	5.31244	5.23497	11.4379	11.4879	8.59874	4.96691	14.0024	7.76411	72.0387	66.3649	70.3747	76.4772	60.7422	80.1304	66.3924	53.2181	54.2939	93.1106	92.525	103.463		41.0094	-0.579185	0.669342	0.4797	-1.20739	0.227281	0.331324		41.0094	-0.163611	0.892788	0.430243	-0.380275	0.703741	0.753293		41.0094	0.0598392	1.04235	0.222584	0.268839	0.788054	0.952307
C02B10.1	ivd-1	699.368	663.763	498.139	657.911	703.899	750.346	401.281	343.679	394.586	1905.64	863.843	867.362	66.2756	62.4028	55.7133	58.7569	52.5059	39.088	339.112	392.908	352.91	347.827	357.688	349.057		467.669	0.182771	1.13506	0.228276	0.800661	0.423328	0.539605		467.669	1.6708	3.18391	0.229798	7.27073	3.57548e-13	2.48028e-11		467.669	-0.293689	0.815813	0.273665	-1.07317	0.283195	0.705603
C02B10.2	snpn-1	3546.17	2193.95	1455.09	1110.55	1159.88	1096.73	1002.73	913.286	1093.95	3495.05	1775.08	1584.99	568.626	496.251	513.149	908.4	704.197	627.363	775.258	1136.83	950.142	985.688	1159.95	961.473		1258.95	-1.09532	0.468032	0.267242	-4.09861	4.15641e-05	0.00020382		1258.95	1.18622	2.27556	0.26775	4.43032	9.40915e-06	4.9469e-05		1258.95	0.505472	1.41959	0.269886	1.87291	0.061081	0.397591
C02B4.1	adt-1	179.687	390.545	774.969	634.721	613.587	656.116	962.693	953.494	849.364	402.319	727.05	568.998	792.426	849.867	840.587	746.119	798.914	857.005	1159.31	776.757	833.954	1555.05	753.74	1569.71		801.958	0.500529	1.41473	0.325422	1.53809	0.124026	0.203761		801.958	-0.701584	0.614897	0.325509	-2.15534	0.0311351	0.0493221		801.958	-0.0477703	0.96743	0.32456	-0.147185	0.882986	0.979283
C02B4.2	nhr-17	1098.38	1021.49	969.289	1083.92	1073.11	1065.32	542.349	619.388	587.58	389.074	431.921	429.244	523.481	507.147	445.706	463.527	499.321	510.099	750.744	743.921	865.444	797.326	760.51	752.457		705.448	0.0613466	1.04344	0.10125	0.605891	0.544587	0.653417		705.448	-0.480294	0.716831	0.111209	-4.31883	1.56861e-05	7.67126e-05		705.448	-0.00378105	0.997383	0.109057	-0.0346705	0.972343	1
C02B8.12	C02B8.12	7.04653	4.10237	3.85557	11.1656	5.31244	6.10747	2.85948	4.78661	2.86625	3.31127	3.23133	3.32748	12.4867	20.8009	16.6162	16.7877	11.3248	11.7264	18.3856	7.9261	9.77289	24.6154	15.797	14.6311		9.9518	0.608108	1.52426	0.542381	1.12118	0.26221	0.370903		9.9518	-0.0917195	0.938404	0.741273	-0.123732	0.901527	0.920465		9.9518	-0.318425	0.801945	0.436449	-0.729581	0.465646	0.829718
C02B8.4	hlh-8	139.169	86.1497	67.0869	111.656	111.561	109.062	157.272	186.678	184.395	97.6825	146.487	118.68	163.288	170.37	135.862	152.022	138.986	140.717	155.256	122.288	146.593	135.92	116.22	132.725		134.422	0.190734	1.14134	0.21076	0.904983	0.365474	0.482735		134.422	-0.529771	0.692665	0.209819	-2.5249	0.0115733	0.0209823		134.422	-0.12056	0.919831	0.205223	-0.587459	0.556895	0.870931
C02B8.5	frpr-1	4.40408	3.28189	5.39779	10.3067	13.2811	12.2149	0	0.957323	0	3.31127	2.15422	4.43663	7.68413	6.93364	12.7065	13.9897	5.14764	7.8176	11.2356	4.5292	10.8588	6.42142	5.64177	6.27048		6.62427	1.44686	2.72615	0.553804	2.61259	0.00898586	0.0228611		6.62427	3.26491	9.61249	1.3322	2.45077	0.0142551	NA		6.62427	-0.00717294	0.99504	0.52423	-0.0136828	0.989083	1
C02C2.1	tyr-1	14.9739	23.7937	32.3868	34.3557	29.2184	30.5373	18.1101	28.7197	19.1083	8.27818	22.6193	21.074	27.855	17.8294	43.9842	46.6325	41.1811	59.6092	33.7069	47.5566	23.8893	157.325	118.477	146.311		43.6472	0.394164	1.31418	0.333017	1.18361	0.236566	0.342294		43.6472	-0.283865	0.821388	0.382004	-0.743094	0.457425	0.522593		43.6472	0.717339	1.64415	0.322742	2.22264	0.0262402	0.276891
C02C2.3	cup-4	318.856	246.142	218.225	249.938	269.164	279.198	368.873	351.337	354.459	193.709	282.203	266.198	2984.32	2678.37	2666.42	3685.83	3864.85	3520.85	533.182	475.566	469.099	401.339	363.33	416.987		1060.77	0.0299691	1.02099	0.146189	0.205002	0.837571	0.89033		1060.77	-0.521116	0.696832	0.149233	-3.49198	0.000479462	0.00139258		1060.77	0.41057	1.32921	0.131653	3.11858	0.00181724	0.0579301
C02C2.5	sup-18	120.672	120.61	128.776	130.552	122.186	130.002	52.4239	46.9088	54.4587	19.8676	26.9278	29.9473	106.617	136.692	123.156	122.177	115.307	145.603	100.099	48.6889	53.208	33.1773	33.8506	47.0286		85.3723	0.0482755	1.03403	0.206633	0.233629	0.815273	0.873138		85.3723	-0.974917	0.508769	0.281816	-3.4594	0.00054137	0.00154415		85.3723	0.0648183	1.04595	0.210212	0.308348	0.757818	0.942242
C02C6.2	olrn-1	234.297	306.037	455.728	672.513	698.586	676.184	723.45	840.529	794.905	551.327	671.04	621.129	469.693	502.194	508.262	481.247	514.764	544.301	757.894	568.414	551.626	712.778	638.648	763.953		594.146	1.0372	2.05225	0.179926	5.76462	8.18404e-09	9.77224e-08		594.146	-0.353714	0.782567	0.179022	-1.97581	0.0481762	0.0724744		594.146	0.0574062	1.04059	0.180178	0.318608	0.750023	0.939828
C02C6.3	lron-3	1182.06	1115.84	1327.09	1330.42	1363.53	1356.73	1819.59	1920.39	1693.95	796.361	1478.87	1421.94	1509.93	1363.95	1316.59	1539.8	1290	1471.66	4721.01	3741.12	3983	3513.59	3303.82	3513.56		2003.12	0.160063	1.11734	0.16814	0.951963	0.341116	0.45699		2003.12	-0.551854	0.682143	0.168621	-3.27274	0.00106509	0.00275528		2003.12	0.0378277	1.02657	0.168251	0.224829	0.822113	0.964571
C02D4.1	jud-4	81.9159	86.9702	117.98	98.7726	77.9158	76.7796	30.5012	26.805	29.6179	8.27818	25.8507	18.8557	100.854	110.938	106.539	110.985	76.1851	91.8568	88.8636	31.7044	48.8645	52.4416	19.182	65.84		66.0208	-0.17973	0.882868	0.318102	-0.565005	0.57207	0.677109		66.0208	-0.659234	0.633214	0.397921	-1.65669	0.0975814	0.135356		66.0208	-0.188776	0.87735	0.318966	-0.591836	0.55396	0.870615
C02D4.2	ser-2	34.3518	58.2536	90.9914	67.8525	58.4369	59.3297	37.1733	45.9515	46.8153	38.0796	31.2362	27.729	43.2232	56.4597	55.7133	41.9692	58.6831	58.632	84.7779	56.615	64.0667	62.0737	47.3909	78.381		54.3411	0.00892222	1.0062	0.277026	0.0322071	0.974307	0.985032		54.3411	-0.437917	0.7382	0.316575	-1.38329	0.166575	0.216632		54.3411	0.0340116	1.02386	0.289086	0.117652	0.906343	0.983007
C02D5.1	acdh-6	273.053	282.243	276.059	373.618	363.902	413.563	455.611	470.046	462.421	157.285	392.068	312.783	355.391	372.436	315.709	401.972	297.534	372.313	461.682	354.41	345.309	308.228	240.339	364.733		350.946	0.469433	1.38456	0.21739	2.15941	0.0308187	0.0642726		350.946	-0.675355	0.626178	0.219321	-3.0793	0.00207486	0.00480292		350.946	0.039167	1.02752	0.217869	0.179773	0.857331	0.970831
C02D5.2	C02D5.2	650.043	623.56	587.588	584.906	577.285	643.901	745.372	738.096	632.485	759.937	627.956	678.805	1384.1	1380.79	1330.28	1504.36	1430.01	1414.99	461.682	403.099	512.534	385.285	455.855	411.761		788.528	-0.0428963	0.970704	0.115445	-0.371573	0.710211	0.794771		788.528	-0.0379976	0.974006	0.116721	-0.325542	0.744771	0.786838		788.528	0.0869679	1.06214	0.111201	0.782076	0.43417	0.812142
C02E11.1	nra-4	4173.31	4859.66	5304.49	5325.13	5411.61	5131.14	5827.63	5679.8	5856.69	11432.2	6525.14	7297.15	6930.13	7634.93	7417.69	5862.63	6953.43	6322.49	5334.88	7447.13	6988.7	6703.96	7361.38	6518.16		6429.14	0.146256	1.10669	0.16961	0.862308	0.388518	0.506251		6429.14	0.539869	1.45384	0.169568	3.18378	0.00145364	0.0035704		6429.14	-0.199916	0.870601	0.169506	-1.1794	0.238239	0.669203
C02F12.1	tsp-17	531.132	494.746	489.657	395.09	401.975	399.603	1315.36	1355.57	1286.94	649.009	1013.56	937.239	520.6	516.061	461.345	496.169	529.177	533.551	523.989	388.379	464.755	512.643	471.652	499.548		632.823	-0.340521	0.789756	0.143507	-2.37286	0.0176511	0.0404394		632.823	-0.600933	0.659328	0.139516	-4.30726	1.65292e-05	8.03954e-05		632.823	0.0572783	1.0405	0.143561	0.398983	0.689906	0.922184
C02F12.3	snet-1	142.692	124.712	141.114	162.331	141.665	146.579	301.199	297.727	319.109	144.04	324.21	208.522	261.26	222.867	247.289	291.919	239.88	253.095	602.638	349.881	401.775	608.965	311.426	622.868		286.157	0.141565	1.1031	0.259913	0.544663	0.585985	0.689956		286.157	-0.430785	0.741858	0.255712	-1.68465	0.0920562	0.128767		286.157	0.102082	1.07332	0.254368	0.401317	0.688187	0.921002
C02F12.4	tag-52	1783.65	2029.03	1767.39	2140.36	2265.76	2131.51	1964.47	1953.9	1977.71	2764.91	1917.26	2374.71	1435.01	1377.81	1325.39	1404.57	1508.26	1286	1131.73	1688.26	1688.54	1678.13	1865.17	1536.27		1791.49	0.228471	1.17159	0.150085	1.52228	0.127939	0.208811		1791.49	0.258007	1.19583	0.150516	1.71415	0.0865008	0.121687		1791.49	0.0208805	1.01458	0.151384	0.137931	0.890295	0.980358
C02F12.7	tag-278	2015.31	2431.88	3267.21	2097.41	2990.02	3171.52	2968.14	3161.08	2701.91	922.189	1810.62	1599.41	3641.32	3797.66	3651.67	2673.91	2584.12	2411.73	3121.46	2229.5	2644.11	2815.79	2323.28	2801.86		2659.71	0.0982297	1.07046	0.212116	0.463094	0.643297	0.742281		2659.71	-1.02543	0.491264	0.213049	-4.81312	1.48593e-06	9.97835e-06		2659.71	-0.53208	0.691557	0.212132	-2.50825	0.0121332	0.194619
C02F4.2	tax-6	923.977	1405.47	2852.35	2891.03	2950.18	2729.16	6100.23	6293.44	5856.69	3615.91	5147.51	4672.89	5786.15	6616.68	5872.38	3876.09	4767.74	4944.63	4526.94	3281.4	3732.16	3462.22	2841.19	3539.68		4111.92	0.72554	1.65352	0.2523	2.8757	0.00403126	0.0115518		4111.92	-0.441532	0.736352	0.251833	-1.75327	0.0795551	0.113231		4111.92	-0.427523	0.743537	0.251741	-1.69826	0.0894583	0.468849
C02F4.4	C02F4.4	453.621	329.83	295.336	388.219	396.662	431.885	762.529	947.75	766.243	271.524	523.476	514.65	238.208	230.791	192.553	229.432	212.083	255.049	349.326	258.164	253.009	204.415	176.023	206.926		370.321	0.174673	1.12871	0.208999	0.835763	0.403288	0.520122		370.321	-0.911983	0.531454	0.20837	-4.37676	1.20457e-05	6.09104e-05		370.321	0.074597	1.05307	0.215859	0.345582	0.729657	0.933385
C02F5.13	C02F5.13	1150.35	863.959	474.235	308.342	315.205	300.138	458.471	455.686	528.345	1291.4	724.895	749.791	80.6834	94.0995	85.0361	75.5446	102.953	89.9024	294.169	434.803	314.904	499.8	539.353	449.384		445.06	-1.42925	0.371324	0.249984	-5.71737	1.08184e-08	1.24045e-07		445.06	0.936631	1.91405	0.249358	3.75617	0.000172533	0.000586745		445.06	0.0456361	1.03214	0.274337	0.16635	0.867881	0.97438
C02F5.2	C02F5.2	13.2122	9.02521	15.4223	10.3067	7.96866	9.59745	0	4.78661	0	0	0	1.10916	0	0	0	0.932649	4.11811	0.9772	0	1.1323	0	3.21071	1.12835	1.04508		3.49886	-0.434725	0.739835	0.64889	-0.669951	0.502889	0.614688		3.49886	-1.82469	0.282303	1.45397	-1.25497	0.209491	NA		3.49886	3.45775	10.9872	1.42907	2.41957	0.0155387	0.218066
C02F5.6	henn-1	926.619	875.445	633.855	406.256	465.724	472.02	615.742	587.796	669.746	1852.66	891.848	868.471	999.898	1071.74	1121.11	1018.45	1174.69	1056.35	518.882	749.582	721.022	797.326	1012.13	759.773		844.464	-0.857673	0.551842	0.227904	-3.76332	0.000167674	0.000703514		844.464	0.944355	1.92433	0.227343	4.15388	3.26889e-05	0.000143554		844.464	0.025346	1.01772	0.226161	0.112071	0.910767	0.983733
C02F5.8	tsp-1	85.4392	62.356	38.5557	30.9201	46.9266	30.5373	0.953161	2.87197	1.91083	6.62254	6.46266	9.98243	6.72361	10.8957	6.84198	25.1815	5.14764	11.7264	15.3213	14.7199	8.68702	48.1606	42.8774	66.8851		24.4461	-0.779102	0.582729	0.366018	-2.12859	0.0332881	0.0685766		24.4461	2.02443	4.0683	0.752399	2.69063	0.0071317	0.013798		24.4461	0.799767	1.74082	0.48897	1.63562	0.10192	0.494415
C02F5.9	pbs-6	4637.5	3578.08	2233.14	1855.21	1808.89	1722.31	2292.35	1865.82	2500.32	8567.91	3955.15	4187.07	2232.24	1952.32	2939.12	2243.95	2741.63	2643.33	2684.29	4069.48	2907.98	2958.13	3581.39	3103.89		3052.56	-0.955827	0.515546	0.261996	-3.64825	0.000264032	0.00105034		3052.56	1.32692	2.50867	0.261914	5.06626	4.05714e-07	3.17505e-06		3052.56	0.0988144	1.07089	0.262094	0.377019	0.706159	0.926098
C02G6.3	C02G6.3	84.5584	69.7402	49.3513	93.6192	83.2283	95.9745	279.276	279.538	266.561	105.961	169.106	157.501	97.9727	92.1184	93.8329	79.2752	77.2146	67.4268	129.72	104.172	123.79	92.0403	71.0863	98.2375		119.221	0.428629	1.34595	0.203388	2.10745	0.0350787	0.0715325		119.221	-0.9151	0.530307	0.186231	-4.91378	8.93353e-07	6.40222e-06		119.221	-0.342496	0.788676	0.206197	-1.66101	0.0967117	0.484414
C02H7.1	dyf-11	224.608	235.476	242.13	193.251	201.873	212.016	147.74	128.281	107.006	84.4374	103.403	116.462	171.932	159.474	171.05	149.224	135.898	132.899	135.849	134.744	142.25	113.445	101.552	145.266		153.761	-0.210514	0.864229	0.148458	-1.418	0.15619	0.24523		153.761	-0.315747	0.803435	0.174024	-1.81439	0.0696178	0.10057		153.761	-0.264781	0.832325	0.159766	-1.65731	0.0974576	0.485591
C02H7.2	npr-19	7.92735	6.56379	16.9645	14.6012	14.1665	18.3224	40.0328	36.3783	33.4395	16.5564	28.0049	16.6374	26.8945	26.7441	36.1648	33.5754	25.7382	35.1792	67.4138	49.8212	47.7786	42.8095	54.161	60.6146		31.5204	0.563464	1.47781	0.371506	1.5167	0.129341	0.210633		31.5204	-0.817956	0.567245	0.324857	-2.51789	0.0118059	0.0213768		31.5204	0.0764588	1.05443	0.299828	0.255009	0.798716	0.956371
C02H7.3	aex-3	504.708	685.095	1405.74	1320.98	1410.45	1378.54	2309.51	2380.86	2151.59	1019.87	1763.23	1514	2025.73	2418.85	2152.29	1607.89	1805.79	1737.46	1740.5	1580.69	1560.41	1686.69	1453.32	1502.82		1629.88	0.662355	1.58266	0.242713	2.72896	0.00635342	0.0171679		1629.88	-0.669752	0.628615	0.242317	-2.76396	0.00571053	0.0113749		1629.88	-0.356913	0.780833	0.241891	-1.47551	0.140075	0.558275
C03A3.1	C03A3.1	910.764	776.988	717.906	1011.77	1063.37	1062.7	1875.82	2265.98	1774.21	816.228	1419.63	1353.17	922.096	861.753	742.844	972.753	865.833	873.617	1326.83	1076.82	1182.52	1179.4	1216.37	1164.22		1143.07	0.383718	1.3047	0.168495	2.27733	0.0227664	0.049988		1143.07	-0.717558	0.608126	0.167851	-4.27496	1.9117e-05	9.06977e-05		1143.07	0.102324	1.0735	0.169277	0.604476	0.545527	0.865984
C03A3.2	C03A3.2	982.991	1010	1064.14	1462.69	1584.88	1484.99	472.768	513.125	408.918	690.4	478.237	476.938	1010.46	1037.07	1191.48	860.835	1011	1027.04	1227.75	1186.65	953.4	1015.65	1074.19	1096.29		971.746	0.567987	1.48245	0.142789	3.9778	6.95572e-05	0.000322792		971.746	0.230832	1.17351	0.149905	1.53985	0.123596	0.166433		971.746	-0.160292	0.894844	0.144077	-1.11255	0.265902	0.694482
C03A3.3	C03A3.3	108.34	88.6111	70.1713	77.3003	76.145	85.5045	651.962	708.419	583.759	841.063	608.568	598.946	132.551	92.1184	86.991	171.607	122.514	121.173	64.3495	47.5566	45.6068	33.1773	24.8238	39.713		228.374	-0.157236	0.896742	0.226266	-0.694917	0.487107	0.600529		228.374	0.0723168	1.0514	0.19872	0.363914	0.715922	0.764499		228.374	0.415085	1.33338	0.220419	1.88316	0.0596785	0.393815
C03B1.13	C03B1.13	195.541	223.169	194.321	163.19	150.519	153.559	85.7845	104.348	97.4523	89.4043	103.403	89.8418	152.722	185.227	154.433	160.416	176.049	150.489	306.426	335.161	332.278	315.72	229.056	290.532		184.96	-0.39153	0.762321	0.151468	-2.58491	0.00974044	0.0245043		184.96	-0.0189934	0.986921	0.179909	-0.105572	0.915922	0.932537		184.96	-0.0163377	0.988739	0.156771	-0.104214	0.917	0.984963
C03B1.2	C03B1.2	2.64245	3.28189	6.94002	3.43557	0	3.48998	37.1733	50.7381	36.3058	14.9007	22.6193	28.8381	20.1708	15.8483	13.684	24.2489	14.4134	22.4756	16.3427	10.1907	9.77289	9.63213	10.1552	7.31556		16.0256	-0.908635	0.532689	0.679964	-1.3363	0.181452	0.275586		16.0256	-0.872213	0.546308	0.354453	-2.46073	0.0138654	0.024605		16.0256	0.303196	1.23387	0.381069	0.795645	0.426238	0.806854
C03B1.5	C03B1.5	56.3723	38.5623	43.1823	37.7913	34.5309	34.8998	21.9227	22.9757	25.7962	13.2451	24.7735	17.7465	462.008	424.933	439.842	477.516	495.203	501.304	101.121	183.432	150.937	151.974	144.429	127.5		168	-0.360337	0.778982	0.237263	-1.51872	0.128832	0.209987		168	-0.298404	0.813151	0.31628	-0.943483	0.345434	0.409444		168	0.151686	1.11087	0.172745	0.878089	0.379895	0.779369
C03B1.7	C03B1.7	338.234	370.854	382.472	245.643	262.966	281.816	4711.48	4687.05	4516.25	4178.82	4079.02	4525.37	1187.2	1207.44	1065.39	1131.3	1175.72	968.405	312.555	367.997	381.143	460.202	555.15	467.151		1577.48	-0.466653	0.723641	0.125466	-3.71936	0.000199731	0.000823159		1577.48	-0.122252	0.918752	0.110572	-1.10563	0.268887	0.328747		1577.48	-0.0792094	0.946576	0.114389	-0.692454	0.488652	0.842807
C03B8.3	C03B8.3	10.5698	5.74331	9.25336	8.58892	12.3957	7.85246	2.85948	2.87197	5.73249	0	1.07711	3.32748	5.7631	4.9526	0	0.932649	5.14764	1.9544	6.12852	4.5292	8.68702	8.56189	4.51341	5.2254		5.27783	0.174937	1.12891	0.55507	0.315161	0.752639	0.827371		5.27783	-1.23606	0.42453	0.938671	-1.31682	0.187899	NA		5.27783	-0.44553	0.734314	0.791103	-0.563176	0.573315	0.877514
C03B8.4	lin-13	2919.91	4364.92	7063.4	6422.8	6034.05	6236.6	5335.8	4646.85	5478.35	13076.2	7244.65	8529.43	4965.87	5500.36	5524.41	4193.19	5325.75	4203.92	7863.92	10841.8	12119.5	12014.5	11356.9	10459.2		7155.09	0.381548	1.30274	0.239959	1.59005	0.111823	0.187143		7155.09	0.899705	1.86568	0.239968	3.74927	0.00017735	0.000600836		7155.09	-0.220675	0.858164	0.240082	-0.919166	0.358009	0.765632
C03C10.1	kin-19	10369.9	10694.9	10268.1	18473.9	20502.5	19358	6438.61	6498.31	6182.49	10084.5	6703.94	7272.75	5571	5747.99	5748.24	4343.35	5466.79	5127.37	5639.26	6794.93	6147.15	6205.23	6752.07	6190.01		8440.89	0.89667	1.86176	0.132285	6.77832	1.2158e-11	2.71601e-10		8440.89	0.330981	1.25787	0.132771	2.49287	0.0126715	0.022714		8440.89	-0.192368	0.875168	0.132925	-1.44719	0.147843	0.567024
C03C10.3	rnr-2	24074.5	19305.7	11575.2	9102.54	9609.32	9254.56	6290.87	5145.61	6726.12	49361.1	18860.2	17703.3	4643.14	5017.98	5846.96	4711.74	5502.83	4820.53	10391.9	22021	14190.2	19272.8	23989.9	18890.9		13596.2	-0.974552	0.508898	0.30522	-3.19295	0.00140826	0.00462109		13596.2	2.242	4.73052	0.305292	7.34378	2.07649e-13	1.56174e-11		13596.2	-0.0446948	0.969495	0.305499	-0.146301	0.883684	0.979283
C03C10.4	rei-1	5066.46	3552.65	2008.75	1419.75	1341.39	1361.09	1637.53	1479.06	1783.76	7524.86	3586.78	3309.73	1663.61	1428.33	1733.95	2437.01	2127	1993.49	1642.44	2966.62	2080.54	2715.19	3140.21	2570.9		2523.8	-1.36623	0.387902	0.280675	-4.86768	1.12916e-06	8.29203e-06		2523.8	1.55669	2.94178	0.280655	5.54663	2.91226e-08	3.25127e-07		2523.8	0.442364	1.35883	0.280906	1.57477	0.115309	0.52295
C03C11.2	fog-3	24.6629	16.4095	18.5067	20.6134	18.5935	38.3898	1.90632	0.957323	1.91083	14.9007	4.30844	3.32748	14.4077	17.8294	17.5937	6.52854	13.3839	11.7264	36.7711	70.2026	36.9198	38.5285	56.4177	44.9384		22.0723	0.385337	1.30616	0.379522	1.01532	0.309953	0.423633		22.0723	2.09318	4.26688	0.796949	2.6265	0.00862692	0.0162551		22.0723	-0.663583	0.631308	0.444291	-1.49358	0.135286	0.551834
C03D6.6	lab-1	607.763	485.72	250.612	92.7604	97.3948	95.9745	61.9555	51.6954	83.1211	346.028	182.032	175.247	33.6181	26.7441	33.2325	63.4201	57.6536	49.8372	37.7926	62.2765	33.6622	49.2309	45.1341	50.1638		128.045	-2.23113	0.212992	0.289964	-7.69452	1.4203e-14	5.80529e-13		128.045	1.82858	3.55189	0.3006	6.08311	1.1787e-09	2.07924e-08		128.045	0.868704	1.82602	0.33178	2.61831	0.00883662	0.158495
C03D6.8	rpl-24.2	4596.98	3396.76	2055.02	1706.62	1647.74	1716.2	2498.24	2239.18	2449.68	2622.53	2197.31	2429.06	2287.95	1927.55	1682.15	3141.16	2223.78	2288.6	2238.95	2407.27	2546.38	3223.55	3922.16	3443.54		2537.01	-0.986597	0.504667	0.204359	-4.82776	1.38075e-06	9.9433e-06		2537.01	0.0120234	1.00837	0.204641	0.0587537	0.953148	0.962715		2537.01	0.376069	1.2978	0.20456	1.83843	0.0659991	0.411266
C03E10.4	gly-20	2115.72	1983.9	1441.21	1917.91	1939.93	1930.83	1424.98	1261.75	1490.45	6837.77	2882.35	2906	1908.55	1729.45	2463.11	2410.9	2820.91	2540.72	1225.7	1863.76	1324.77	1399.87	1596.62	1430.71		2118.66	0.0632406	1.04481	0.248606	0.254381	0.799201	0.861882		2118.66	1.5949	3.02075	0.248735	6.41207	1.43554e-10	3.41897e-09		2118.66	0.349275	1.27392	0.24855	1.40525	0.159947	0.585111
C03F11.1	kcnl-3	18.4971	24.6142	31.6156	42.0857	32.7601	45.3697	23.829	34.4636	32.4841	24.8345	31.2362	27.729	81.6439	79.2416	72.3296	63.4201	51.4764	71.3356	38.814	26.0429	18.4599	29.9666	16.9253	24.0368		39.3005	0.677848	1.59975	0.281623	2.40694	0.016087	0.0374207		39.3005	-0.101715	0.931924	0.306765	-0.331574	0.740211	0.783295		39.3005	-0.322991	0.799411	0.247144	-1.30689	0.191249	0.619947
C03F11.2	C03F11.2	51.9682	63.1765	107.956	110.797	111.561	113.424	112.473	134.025	114.65	49.6691	100.171	67.6587	275.668	312.014	279.544	301.246	260.471	294.137	291.105	233.254	270.383	210.837	133.146	172.438		173.824	0.583454	1.49843	0.233497	2.49876	0.0124628	0.0302779		173.824	-0.707436	0.612407	0.242575	-2.91636	0.00354139	0.0075645		173.824	-0.0185974	0.987192	0.214919	-0.0865318	0.931044	0.991097
C03F11.3	scav-1	402.533	427.467	411.775	467.237	437.391	444.1	750.138	831.914	790.128	344.372	666.732	598.946	786.663	825.104	809.309	970.888	928.634	937.135	646.559	461.978	454.982	490.168	400.566	500.593		616.055	0.119168	1.08611	0.178988	0.665788	0.505546	0.617024		616.055	-0.551509	0.682306	0.178291	-3.09331	0.00197937	0.00460971		616.055	0.228612	1.17171	0.175692	1.30121	0.193187	0.621911
C03G5.7	flp-5	151.5	127.994	155.765	176.073	177.967	194.566	75.2998	76.5858	84.0765	46.3578	90.4773	54.3488	215.156	163.436	193.53	229.432	212.083	216.938	207.348	139.273	169.397	169.097	144.429	207.971		153.296	0.333749	1.26028	0.191371	1.74399	0.0811604	0.143956		153.296	-0.276027	0.825862	0.226308	-1.2197	0.222579	0.278711		153.296	0.202694	1.15085	0.189792	1.06797	0.285532	0.706599
C03H12.1	C03H12.1	1138.01	1216.76	1268.48	1294.35	1313.06	1259.01	860.705	840.529	835.033	754.97	729.204	794.158	1247.71	1233.2	1071.26	1273.07	1273.53	1119.87	832.458	949.999	1064.16	997.46	1049.37	905.039		1055.06	0.0934202	1.0669	0.108023	0.864817	0.387139	0.504896		1055.06	-0.154612	0.898374	0.112567	-1.37352	0.16959	0.219834		1055.06	0.0456569	1.03215	0.108877	0.419342	0.674966	0.916486
C03H5.2	nstp-4	867.604	830.319	802.729	1139.75	1330.77	1347.13	884.534	829.042	914.332	2321.2	1234.37	1210.09	1574.29	1467.95	1479.82	1799.08	1693.57	1776.55	559.739	559.356	635.238	556.523	569.819	505.819		1120.4	0.610454	1.52674	0.178613	3.41774	0.000631434	0.00229806		1120.4	0.855347	1.80919	0.179046	4.77724	1.7772e-06	1.16925e-05		1120.4	0.220625	1.16524	0.177701	1.24155	0.214402	0.648849
C03H5.6	C03H5.6	140.931	133.737	253.696	323.802	304.58	285.306	380.311	369.527	379.3	177.153	297.283	202.976	101.815	139.663	112.404	100.726	128.691	123.127	844.715	535.578	616.778	542.61	401.694	528.81		309.384	0.787904	1.72656	0.233255	3.37786	0.000730519	0.00262401		309.384	-0.730644	0.602635	0.234172	-3.12012	0.00180776	0.00429689		309.384	-0.00608644	0.99579	0.246396	-0.0247019	0.980293	1
C04A11.1	C04A11.1	97.7706	101.739	193.549	291.164	294.841	231.211	343.138	306.343	299.045	145.696	243.427	249.561	191.143	225.839	259.995	248.085	255.323	280.456	285.998	209.475	207.403	169.097	110.579	194.385		226.469	1.05286	2.07464	0.247986	4.24564	2.17974e-05	0.000115328		226.469	-0.562059	0.677335	0.247275	-2.27301	0.0230254	0.0380364		226.469	0.211578	1.15795	0.246019	0.860005	0.389786	0.786333
C04A11.2	C04A11.2	626.261	683.454	657.76	681.101	731.346	820.145	1302.97	1371.84	1307.96	1468.55	1189.13	1397.54	1364.89	1497.67	1131.86	1343.01	1401.19	1395.44	776.28	1207.03	1355.17	1352.78	1610.16	1299.03		1165.52	0.182241	1.13465	0.167058	1.09089	0.275323	0.385711		1165.52	0.0250951	1.01755	0.165467	0.151663	0.879453	0.902829		1165.52	0.0515072	1.03635	0.165	0.312166	0.754915	0.940946
C04A11.4	adm-2	638.592	789.295	1082.64	1133.74	1155.46	1108.94	1254.36	1329.72	1183.76	1279.81	1138.51	1123.58	3890.09	4271.12	3779.71	3680.23	3858.67	3297.07	1706.79	1611.26	1534.34	2092.31	1792.95	2057.76		1949.61	0.435691	1.35256	0.147072	2.96243	0.00305221	0.00909307		1949.61	-0.0904185	0.93925	0.147282	-0.613914	0.539272	0.600265		1949.61	-0.140099	0.907457	0.144124	-0.972071	0.331015	0.743537
C04A2.1	tbc-6	155.905	155.069	115.667	82.4536	92.9677	74.1621	77.2061	86.1591	75.4778	54.636	71.0893	53.2396	62.4336	49.526	48.8713	50.3631	57.6536	42.0196	103.163	70.2026	104.244	139.131	118.477	110.778		85.454	-0.771838	0.585671	0.1981	-3.8962	9.77121e-05	0.000436007		85.454	-0.406802	0.754294	0.225303	-1.80558	0.0709841	0.102296		85.454	-0.102935	0.931137	0.232739	-0.442276	0.65829	0.911508
C04A2.3	egl-27	5290.18	6878.03	7040.26	8699.72	9743.02	9187.37	10699.2	10925.9	9834.09	14586.1	9097.28	11032.8	7663.96	7489.33	5976.96	6501.5	7614.39	6382.09	6786.32	8338.25	7792.25	8256.88	8596.93	7709.55		8421.77	0.524431	1.43837	0.159847	3.28083	0.00103502	0.00352703		8421.77	0.141789	1.10327	0.1598	0.887291	0.374923	0.440161		8421.77	-0.0438615	0.970055	0.159974	-0.274179	0.783947	0.952307
C04A2.7	dnj-5	5631.06	7770.7	9830.92	8735.79	9045.32	9039.05	6689.29	6653.39	6805.42	16228.5	8483.32	9265.91	5286.68	5651.91	5959.37	4592.36	5225.88	4519.55	2556.62	3129.68	2802.65	2843.62	2982.24	2591.8		6346.71	0.207096	1.15436	0.199401	1.03859	0.298995	0.411588		6346.71	0.753585	1.68598	0.19949	3.77755	0.00015838	0.000546944		6346.71	-0.237046	0.848481	0.199704	-1.18698	0.235234	0.667435
C04C11.1	C04C11.1	41.3984	25.4347	40.869	31.779	27.4476	31.4098	15.2506	9.57323	18.1529	3.31127	11.8482	7.76411	25.9339	31.6967	25.4131	23.3162	26.7677	16.6124	55.1567	32.8367	34.7481	70.6356	42.8774	73.1556		30.1412	-0.248043	0.842038	0.307467	-0.806729	0.419822	0.536055		30.1412	-0.821669	0.565787	0.459478	-1.78827	0.0737331	0.10583		30.1412	-0.317653	0.802374	0.337146	-0.942184	0.346099	0.75564
C04C3.2	lgc-9	14.0931	15.589	6.16891	9.44781	9.73948	18.3224	12.3911	6.70126	11.465	34.7683	8.61689	13.3099	24.9734	12.8768	22.4808	22.3836	29.8563	24.43	30.6426	24.9106	22.8034	25.6857	25.9521	17.7664		18.5573	0.0751837	1.0535	0.444085	0.1693	0.86556	0.911381		18.5573	0.805731	1.74803	0.463299	1.73912	0.0820142	0.116407		18.5573	0.341598	1.26716	0.401198	0.851445	0.394522	0.788692
C04C3.3	pdhb-1	857.034	818.012	826.633	1261.71	1322.8	1295.66	1595.59	1600.64	1514.33	3549.68	1928.03	1914.41	968.201	1080.66	1097.65	886.949	1148.95	1067.1	1718.03	1900	1668.99	1484.42	1674.48	1452.66		1443.03	0.633263	1.55107	0.178324	3.5512	0.000383473	0.00146742		1443.03	0.64795	1.56694	0.177281	3.65492	0.000257257	0.000823524		1443.03	-0.0202971	0.98603	0.178742	-0.113555	0.90959	0.983647
C04C3.5	dyf-3	152.381	153.429	157.307	139.141	158.488	183.224	47.6581	66.0553	67.8345	26.4902	53.8555	44.3663	151.762	130.749	124.133	159.483	135.898	120.196	37.7926	22.646	45.6068	39.5988	46.2625	44.9384		96.2206	0.0538351	1.03802	0.193532	0.278172	0.78088	0.847734		96.2206	-0.500239	0.706989	0.247429	-2.02175	0.0432022	0.0658306		96.2206	0.0319864	1.02242	0.199686	0.160184	0.872737	0.976793
C04C3.6	C04C3.6	2.64245	1.64095	3.85557	3.43557	2.65622	3.48998	0	1.91465	0	0	2.15422	6.65495	3.84207	2.97156	6.84198	12.1244	9.26575	18.5668	1.02142	1.1323	3.25763	6.42142	5.64177	7.31556		4.45197	0.227333	1.17067	0.768547	0.295796	0.767386	0.838497		4.45197	2.33198	5.03496	1.22553	1.90283	0.0570623	NA		4.45197	1.55037	2.92893	0.626126	2.47614	0.0132813	0.20234
C04D8.1	pac-1	1884.07	3003.75	4834.88	4433.6	4675.83	4170.53	5848.6	5976.57	5614.02	8601.03	5735.61	6526.29	5961.93	6468.1	6383.57	5039.1	5875.52	5237.79	2758.86	3120.62	3019.82	3277.06	3284.64	3190.63		4788.43	0.449597	1.36566	0.213689	2.10398	0.0353802	0.0719747		4788.43	0.258325	1.19609	0.213522	1.20983	0.226344	0.28298		4788.43	-0.220044	0.858539	0.213504	-1.03063	0.302714	0.722841
C04E6.11	C04E6.11	390.202	530.846	512.79	314.355	301.924	326.313	335.513	356.124	378.344	567.883	339.29	385.987	129.67	134.711	119.246	114.716	138.986	109.446	157.299	167.58	186.771	136.99	169.253	134.815		268.294	-0.605834	0.657091	0.173978	-3.48226	0.000497209	0.00185618		268.294	0.264489	1.20121	0.176259	1.50057	0.133468	0.178582		268.294	-0.0805189	0.945717	0.195093	-0.41272	0.679812	0.918171
C04E6.12	C04E6.12	93.3666	57.4331	57.0624	46.3802	40.7287	54.9672	39.0796	40.2076	41.0829	13.2451	25.8507	27.729	74.9203	68.3459	53.7585	58.7569	61.7717	55.7004	57.1996	46.4243	60.8091	57.7928	69.9579	40.7581		51.8053	-0.543668	0.686025	0.248679	-2.18622	0.0287992	0.0607937		51.8053	-0.799165	0.574682	0.307985	-2.59481	0.0094642	0.017619		51.8053	-0.161702	0.89397	0.250342	-0.645927	0.518327	0.855891
C04E6.6	grd-9	0	0.820473	0.771113	0	0.885407	2.61749	0.953161	3.82929	4.77708	1.65564	2.15422	1.10916	0.960516	0	2.93228	0.932649	1.02953	1.9544	1.02142	5.6615	6.51526	5.35118	4.51341	4.18032		2.27606	1.09442	2.13527	1.39581	0.784076	0.432996	NA		2.27606	-0.955939	0.515506	1.05641	-0.904896	0.36552	NA		2.27606	0.00482009	1.00335	1.19312	0.00403991	0.996777	1
C04E6.7	C04E6.7	124.195	102.559	85.5936	153.742	136.353	141.344	53.377	51.6954	55.4141	21.5233	40.9302	36.6022	18.2498	23.7725	26.3905	50.3631	39.1221	51.7916	59.2424	46.4243	43.4351	65.2844	50.7759	84.6515		65.118	0.469164	1.38431	0.206506	2.27191	0.0230919	0.0505535		65.118	-0.654765	0.635179	0.266162	-2.46002	0.0138928	0.0246374		65.118	1.05015	2.07074	0.27759	3.78308	0.000154898	0.00851604
C04F1.3	lim-7	1131.85	1037.08	1161.3	1336.44	1330.77	1352.37	1417.35	1437.9	1351.91	857.619	1095.42	1297.72	1219.86	1302.53	1113.29	1033.38	1202.49	1126.71	1123.56	1099.46	1241.16	1031.71	1173.49	1028.36		1187.65	0.271383	1.20696	0.127488	2.1287	0.0332791	0.0685766		1187.65	-0.367991	0.774861	0.128738	-2.85846	0.00425699	0.00885736		1187.65	-0.112892	0.924733	0.128265	-0.880149	0.378778	0.778594
C04F12.10	fce-1	1724.64	1536.75	1339.42	1254.84	1251.08	1317.47	2627.87	2819.32	2474.53	2218.55	2294.25	2191.7	1462.87	1412.48	1462.23	1715.14	1785.2	1647.56	1157.27	1329.32	1270.48	1435.19	1678.99	1430.71		1701.58	-0.266501	0.831333	0.106481	-2.5028	0.0123215	0.0299995		1701.58	-0.240553	0.846421	0.105536	-2.27934	0.0226467	0.0374996		1701.58	0.247001	1.18674	0.10656	2.31796	0.0204516	0.253126
C04F12.5	C04F12.5	849.107	682.634	343.145	289.447	259.424	249.534	33.3607	38.2929	42.0383	24.8345	30.1591	23.2923	94.1306	60.4218	85.0361	142.695	122.514	129.968	53.1139	23.7783	60.8091	61.0035	46.2625	51.2089		158.175	-1.23089	0.426055	0.266784	-4.6138	3.95365e-06	2.56195e-05		158.175	-0.532602	0.691307	0.344543	-1.54582	0.122147	0.164793		158.175	0.721806	1.64925	0.285689	2.52654	0.0115191	0.188759
C04F12.8	C04F12.8	241.344	201.016	261.407	180.367	169.113	175.372	543.302	493.979	553.185	503.313	385.606	372.677	620.494	587.379	589.388	419.692	385.043	431.923	467.811	310.25	392.002	229.031	187.307	218.422		371.643	-0.423519	0.745604	0.162266	-2.61003	0.00905353	0.0230018		371.643	-0.341171	0.789401	0.154254	-2.21174	0.0269843	0.0436997		371.643	-0.539106	0.688197	0.152365	-3.53824	0.000402802	0.0187488
C04F5.1	sid-1	435.123	497.207	505.85	539.384	539.213	513.9	1714.74	1462.79	1693.95	6769.89	2980.37	2805.06	1460.95	1424.37	2141.54	1158.35	1451.63	1181.44	1538.26	2480.87	1642.93	2207.9	2245.42	2120.47		1729.65	0.146867	1.10716	0.253963	0.578301	0.563061	0.669214		1729.65	1.36498	2.57573	0.25057	5.44751	5.10804e-08	5.33581e-07		1729.65	-0.407013	0.754183	0.251211	-1.6202	0.105188	0.50256
C04F5.3	unc-46	57.2531	43.4851	53.2068	50.6746	42.4995	59.3297	51.4707	53.6101	52.5478	28.1458	37.6989	37.7114	124.867	131.739	104.585	128.706	93.687	112.378	28.5998	31.7044	43.4351	22.475	24.8238	22.9918		59.901	-0.0117511	0.991888	0.224248	-0.0524021	0.958208	0.974362		59.901	-0.583122	0.667518	0.254067	-2.29515	0.0217243	0.0361734		59.901	-0.1072	0.928388	0.197368	-0.54315	0.587026	0.883011
C04F5.9	C04F5.9	318.856	306.037	282.227	288.588	258.539	285.306	401.281	440.369	409.873	723.513	458.849	510.213	514.837	523.985	492.623	484.978	497.262	422.151	422.868	507.27	479.958	484.817	646.547	503.728		444.361	-0.123253	0.918115	0.159935	-0.770644	0.440918	0.556969		444.361	0.427941	1.34531	0.157069	2.72454	0.00643916	0.0126326		444.361	-0.125034	0.916982	0.15584	-0.802323	0.422366	0.80308
C04F6.3	cht-1	16636.9	18469.7	18657.9	62747.2	63794.5	70755.9	10745.9	11122.2	10383.5	22670.6	19101.5	17788.7	9664.72	10061.7	7747.08	14249	16811.2	16990.6	3934.51	10385.4	8996.49	14526.3	16114	12490.8		20201.9	1.87565	3.66966	0.223457	8.39376	4.70844e-17	3.46793e-15		20201.9	0.88494	1.84669	0.223603	3.95764	7.56951e-05	0.000294256		20201.9	0.806512	1.74898	0.223626	3.60653	0.000310318	0.0149012
C04F6.5	dhs-27	1552	1188.05	897.576	930.18	924.365	951.892	937.911	897.969	896.179	471.856	608.568	683.242	988.371	861.753	762.393	1122.91	1023.35	1008.47	929.493	869.606	1019.64	1024.22	1312.28	1024.18		953.602	-0.373701	0.7718	0.172667	-2.16429	0.030442	0.0636059		953.602	-0.627585	0.647259	0.175853	-3.5688	0.000358614	0.00109406		953.602	0.272109	1.20757	0.173549	1.56791	0.116902	0.523886
C04F6.7	C04F6.7	0.880817	0.820473	3.08445	12.0245	9.73948	9.59745	80.0656	78.5005	74.5224	21.5233	47.3929	34.3839	14.4077	7.92416	15.6388	3.7306	8.23622	2.9316	19.407	12.4553	11.9446	26.7559	21.4387	27.1721		22.6908	2.67363	6.38033	0.680472	3.92908	8.52705e-05	0.000384674		22.6908	-1.13863	0.45419	0.301119	-3.78134	0.000155989	0.000540254		22.6908	-1.37031	0.386809	0.499293	-2.74449	0.00606042	0.129436
C04G2.6	dis-3	1387.29	1699.2	1479	1075.33	1098.79	1106.32	2980.54	2871.97	2881.53	7889.1	4280.44	4420	100.854	93.1089	111.427	101.659	106.041	92.834	1356.45	1742.61	1659.22	1596.79	1737.66	1578.07		1810.26	-0.476933	0.718504	0.181768	-2.62385	0.00869424	0.0222716		1810.26	0.924658	1.89823	0.180275	5.12916	2.91034e-07	2.37922e-06		1810.26	-0.0236034	0.983772	0.213416	-0.110598	0.911935	0.983733
C04G2.7	egl-38	244.867	241.219	303.048	427.728	445.36	416.18	479.44	549.503	451.911	246.69	435.153	439.227	477.377	540.824	523.901	450.47	492.114	486.646	499.475	472.169	523.393	440.937	417.491	466.106		436.301	0.707101	1.63252	0.163621	4.32157	1.54926e-05	8.44319e-05		436.301	-0.389761	0.763256	0.163942	-2.37743	0.0174338	0.0298716		436.301	-0.109788	0.926724	0.16105	-0.681703	0.495426	0.846053
C04G6.3	pld-1	904.599	1250.4	1819.06	2109.44	2117.89	2144.59	1476.45	1554.69	1413.06	1496.69	1420.71	1350.96	2216.87	2403	2378.08	1906.33	2154.8	1924.11	2534.14	2189.87	2418.25	2531.11	2473.35	2495.65		1945.17	0.680422	1.60261	0.164563	4.13473	3.55369e-05	0.000178168		1945.17	-0.05872	0.960116	0.165636	-0.354512	0.722956	0.769709		1945.17	-0.225586	0.855248	0.164303	-1.37299	0.169757	0.598371
C04H5.3	gcy-29	9.68898	9.84568	25.4467	12.0245	21.2498	7.85246	7.62529	7.65858	3.82166	1.65564	6.46266	2.21832	22.0919	14.8578	25.4131	27.9795	30.8858	30.2932	5.1071	3.3969	1.08588	8.56189	7.89848	3.13524		12.344	-0.143166	0.90553	0.461012	-0.310548	0.756144	0.830228		12.344	-0.803749	0.572859	0.68611	-1.17146	0.241415	0.299567		12.344	0.514309	1.42831	0.43126	1.19257	0.233037	0.663434
C04H5.6	mog-4	1692.93	1937.96	1775.87	1308.09	1454.72	1430.89	1235.3	1170.81	1284.08	3375.84	1742.77	1899.99	1996.91	2062.26	2317.48	1852.24	2082.74	1773.62	1116.41	1819.61	1565.83	1544.35	1680.12	1550.9		1736.32	-0.366584	0.775617	0.196222	-1.86821	0.0617333	0.11501		1736.32	0.925637	1.89952	0.196651	4.707	2.51394e-06	1.59238e-05		1736.32	-0.159715	0.895202	0.196033	-0.814736	0.415224	0.800178
C04H5.8	nlp-41	63.4188	41.0237	23.1334	29.2023	32.7601	40.1348	6.67213	7.65858	3.82166	0	3.23133	6.65495	30.7365	28.7251	27.3679	77.4099	39.1221	40.0652	22.4713	9.05839	7.60114	14.9833	12.4119	20.9016		24.5236	-0.31576	0.803428	0.38077	-0.829267	0.406954	0.523759		24.5236	-0.736677	0.60012	0.678462	-1.08581	0.277565	0.337742		24.5236	0.853801	1.80726	0.387421	2.20381	0.0275378	0.282337
C05A2.1	pph-1	126.838	124.712	167.332	203.557	193.904	193.694	241.15	255.605	217.835	155.63	187.417	167.483	126.788	114.9	137.817	179.069	168.843	165.147	146.063	103.039	116.189	101.672	75.5997	74.2007		156.02	0.494467	1.4088	0.164556	3.00486	0.00265704	0.00802506		156.02	-0.478957	0.717496	0.166829	-2.87094	0.00409249	0.00857252		156.02	0.435178	1.35208	0.171021	2.54459	0.0109407	0.182834
C05A9.2	C05A9.2	2193.23	2052.82	1880.75	3213.12	3203.4	3207.29	2797.53	3109.38	2856.69	2062.92	2415.96	2786.21	3197.56	3093.4	2783.71	3460.13	3563.2	3236.49	2285.94	2511.44	2861.29	2413.38	2661.79	2317.99		2756.9	0.651664	1.57098	0.119647	5.44655	5.13569e-08	5.12123e-07		2756.9	-0.269027	0.829879	0.120164	-2.23883	0.0251671	0.0411263		2756.9	0.177055	1.13057	0.119455	1.48219	0.13829	0.557112
C05B10.1	lip-1	615.691	658.02	1012.47	1672.26	1777.01	1721.43	462.283	525.57	461.466	842.718	630.11	544.597	1825.94	1909.72	2330.18	1534.21	1961.25	1956.35	1757.87	2398.21	1644.02	1596.79	1737.66	1729.61		1387.73	1.17676	2.26069	0.192765	6.10465	1.03024e-09	1.5514e-08		1387.73	0.473575	1.38855	0.19685	2.40576	0.0161387	0.027995		1387.73	-0.154076	0.898708	0.191746	-0.803543	0.421661	0.80308
C05B5.12	C05B5.12	0	0.820473	0	1.71778	0	1.74499	0	0	0	0	0	0	0	0	0	0.932649	0	1.9544	0	0	0	0	0	0		0.298762	1.97018	3.91818	3.27102	0.602315	0.546964	NA		0.298762	0	1	3.40039	0	1	NA		0.298762	2.42568	5.37281	3.29852	0.735384	0.462106	0.828539
C05B5.3	pqn-8	128.599	95.9954	94.0758	131.41	107.134	136.982	91.5035	113.921	85.9874	34.7683	61.3953	48.803	105.657	105.986	109.472	106.322	95.7461	76.2216	149.127	95.1131	115.103	116.656	133.146	125.41		102.689	0.239974	1.18097	0.201675	1.1899	0.234084	0.339313		102.689	-0.976854	0.508087	0.234283	-4.16955	3.05202e-05	0.000135194		102.689	-0.205695	0.867121	0.209994	-0.979527	0.32732	0.740642
C05B5.4	C05B5.4	271.291	283.063	227.478	303.189	297.497	268.729	422.251	375.271	368.79	298.014	294.051	400.406	464.89	498.232	510.217	614.616	674.341	649.838	256.377	372.526	346.395	271.84	304.656	235.143		375.379	0.154103	1.11273	0.158504	0.972231	0.330936	0.446782		375.379	-0.229139	0.853144	0.158751	-1.44338	0.148913	0.19627		375.379	0.395934	1.31579	0.152552	2.5954	0.00944804	0.165583
C05B5.8	C05B5.8	436.004	324.907	190.465	314.355	272.705	306.246	158.225	159.873	133.758	135.762	168.029	174.138	347.707	287.251	271.725	592.232	331.508	381.108	123.592	95.1131	87.956	159.465	101.552	191.25		239.372	-0.089462	0.939873	0.258528	-0.346044	0.729309	0.809268		239.372	0.0854747	1.06104	0.270046	0.316519	0.751608	0.79289		239.372	0.525771	1.4397	0.258462	2.03423	0.0419287	0.341846
C05C10.3	C05C10.3	1442.78	1472.75	926.107	1077.05	1035.04	1156.93	465.143	348.466	509.236	1286.43	657.038	634.439	664.677	635.914	895.323	706.948	786.559	771.011	498.453	551.43	485.387	427.024	489.706	457.745		765.899	-0.232637	0.851078	0.225667	-1.03089	0.302594	0.415389		765.899	0.958377	1.94312	0.229046	4.18422	2.86153e-05	0.000127679		765.899	0.0442938	1.03118	0.227485	0.194711	0.845619	0.967971
C05C10.6	ufd-3	2410.79	3101.39	2819.96	2277.78	2294.98	2345.27	2953.85	2680.5	3254.14	9733.48	4921.32	5213.05	725.19	765.672	763.37	553.061	693.902	663.519	4414.58	6777.94	5486.94	6188.11	6972.1	5819		3492.91	-0.268379	0.830252	0.204712	-1.31101	0.189855	0.285666		3492.91	1.15978	2.23424	0.204442	5.67292	1.40388e-08	1.75977e-07		3492.91	-0.238936	0.84737	0.208345	-1.14683	0.251451	0.680684
C05C12.3	gtl-1	229.893	320.805	587.588	353.864	384.267	398.73	634.806	639.492	600.001	304.637	467.466	363.804	600.323	681.478	641.192	434.614	390.191	404.561	646.559	403.099	483.215	359.599	247.109	326.065		454.307	-0.0033456	0.997684	0.243825	-0.0137213	0.989052	0.994264		454.307	-0.719248	0.607414	0.244424	-2.94262	0.00325445	0.0070336		454.307	-0.645262	0.639377	0.24303	-2.65507	0.00792924	0.146017
C05C8.1	C05C8.1	785.688	581.716	309.216	127.116	116.874	129.129	119.145	147.428	122.293	203.643	159.412	137.536	136.393	118.862	117.291	157.618	150.311	112.378	108.271	150.596	137.906	136.99	178.28	153.627		191.572	-2.16678	0.222707	0.246716	-8.7825	1.59879e-18	1.50549e-16		191.572	0.3571	1.28085	0.25575	1.39629	0.162628	0.212311		191.572	0.173973	1.12816	0.255505	0.6809	0.495935	0.846302
C05C8.3	fkb-3	4681.54	3265.48	2105.14	1779.62	1644.2	1833.11	1832.93	1899.33	1816.24	769.87	1274.22	1309.92	1537.79	1510.54	1337.12	1771.1	1434.13	1513.68	2981.53	2497.85	2748.35	2915.32	3297.05	3038.05		2116.42	-0.935014	0.523037	0.211559	-4.41964	9.88652e-06	5.67483e-05		2116.42	-0.723954	0.605436	0.213053	-3.39799	0.000678825	0.00187266		2116.42	0.105822	1.07611	0.212454	0.498097	0.618416	0.895796
C05C8.7	C05C8.7	2468.93	2626.34	2933.31	3900.23	4006.47	3919.25	4079.53	4572.17	3740.45	2115.9	2913.58	3265.36	3941.96	4408.81	3781.66	3553.39	4016.19	3853.1	2104.13	1665.61	1933.95	1514.38	1446.55	1481.92		3093.47	0.558617	1.47286	0.140537	3.97486	7.04193e-05	0.00032598		3093.47	-0.577581	0.670086	0.140942	-4.09801	4.16722e-05	0.000176391		3093.47	-0.0870054	0.941475	0.140462	-0.619422	0.535638	0.860288
C05C9.1	C05C9.1	81.0351	96.8159	101.787	103.067	96.5094	116.042	99.1288	110.092	93.6307	21.5233	70.0122	78.7503	156.564	152.54	145.637	121.244	105.012	128.99	112.356	70.2026	79.269	54.5821	55.2893	65.84		96.4967	0.173052	1.12744	0.229759	0.753188	0.451337	0.566379		96.4967	-0.77953	0.582557	0.249657	-3.1224	0.00179381	0.00426798		96.4967	-0.35552	0.781588	0.226093	-1.57245	0.115846	0.523112
C05C9.2	C05C9.2	16.7355	18.0504	7.71113	12.0245	13.2811	14.8324	6.67213	2.87197	1.91083	3.31127	2.15422	5.54579	9.60516	3.96208	3.90971	7.46119	7.2067	10.7492	5.1071	2.2646	0	1.07024	10.1552	2.09016		7.02844	-0.0767747	0.948175	0.527037	-0.145672	0.88418	0.924812		7.02844	-0.04919	0.966479	0.77426	-0.0635316	0.949343	NA		7.02844	0.536745	1.4507	0.622976	0.861582	0.388918	0.786127
C05D10.2	mapk-15	333.829	340.496	404.063	301.471	260.31	337.656	247.822	284.325	228.344	96.0269	151.873	185.229	3345.48	3766.95	3424.9	3613.08	3406.71	3686	144.02	100.775	97.7289	79.1975	99.2951	94.0572		1042.9	-0.262304	0.833755	0.174215	-1.50564	0.132161	0.214333		1042.9	-0.791616	0.577697	0.188008	-4.21054	2.54757e-05	0.000115506		1042.9	0.0229143	1.01601	0.164701	0.139127	0.88935	0.979997
C05D10.3	wht-1	391.083	449.619	285.312	432.023	455.099	475.51	508.035	555.247	490.128	331.127	324.21	482.484	222.84	197.114	184.734	204.25	229.585	168.078	304.383	457.449	453.897	406.69	495.347	436.843		372.545	0.275835	1.21069	0.192208	1.43508	0.151264	0.239111		372.545	-0.446297	0.733924	0.19415	-2.29873	0.0215205	0.0358675		372.545	-0.00734525	0.994922	0.202079	-0.0363484	0.971005	1
C05D10.4	C05D10.4	794.497	898.418	1242.26	1106.25	1030.61	1062.7	1143.79	1272.28	1146.5	470.2	749.669	824.105	1012.38	1146.03	1005.77	806.741	1057.33	924.431	2235.89	1592.01	1854.68	1548.63	1354.02	1572.84		1160.5	0.12397	1.08973	0.188065	0.659186	0.509777	0.621371		1160.5	-0.797019	0.575537	0.189924	-4.19652	2.71043e-05	0.000122106		1160.5	-0.182578	0.881127	0.188654	-0.967794	0.333147	0.745099
C05D11.1	C05D11.1	1492.98	1771.4	1560.73	1827.72	1825.71	1974.46	1376.37	1253.14	1374.84	2938.75	1716.91	1837.88	2336.94	2468.38	2711.38	2301.78	2548.08	2383.39	2408.51	2663.17	2344.41	3174.32	3276.74	3192.72		2198.36	0.221979	1.16633	0.153627	1.44493	0.148479	0.235559		2198.36	0.694818	1.61868	0.15437	4.50098	6.76406e-06	3.75226e-05		2198.36	-0.0555022	0.962259	0.153217	-0.362247	0.717167	0.930111
C05D11.12	let-721	3390.26	3598.6	3078.28	3396.92	3351.27	3583.34	3840.29	3867.58	3798.73	5774.86	3964.84	4312.41	5173.34	5158.63	5179.38	3632.67	3996.63	4046.59	3351.28	3729.79	3615.97	2947.43	3468.56	3008.78		3886.1	0.0374621	1.02631	0.123154	0.30419	0.760983	0.833596		3886.1	0.287089	1.22018	0.12322	2.32989	0.0198121	0.0333625		3886.1	-0.409843	0.752705	0.122989	-3.33235	0.000861172	0.0344273
C05D11.3	txdc-9	4047.35	2838.02	1600.83	800.487	753.481	770.413	848.314	837.657	901.912	2248.35	1224.67	1184.58	1655.93	1532.34	1649.9	1996.8	1958.16	1847.89	842.672	871.871	793.776	881.875	1108.04	928.031		1421.81	-1.86806	0.273941	0.23963	-7.79561	6.40964e-15	2.83817e-13		1421.81	0.84594	1.79744	0.240375	3.51925	0.00043277	0.00128358		1421.81	0.262299	1.19939	0.239188	1.09663	0.272805	0.698183
C05D11.4	let-756	368.181	420.082	531.297	813.371	771.19	735.513	1213.37	1350.78	1236.31	824.506	1136.35	1142.43	953.793	1101.46	970.584	907.468	919.368	968.405	1837.54	1642.97	1855.76	1590.37	1686.89	1516.41		1103.93	0.812671	1.75646	0.141908	5.72675	1.02374e-08	1.18439e-07		1103.93	-0.28871	0.818634	0.139406	-2.071	0.038359	0.0593493		1103.93	-0.114306	0.923827	0.139493	-0.819439	0.412536	0.79922
C05D11.5	C05D11.5	126.838	85.3292	81.738	70.4292	82.3429	70.6721	91.5035	74.6712	89.809	402.319	187.417	189.666	52.8284	62.4028	51.8036	69.016	43.2402	42.9968	30.6426	52.0858	70.582	63.144	68.8296	73.1556		93.0609	-0.393487	0.761287	0.289497	-1.35921	0.17408	0.266787		93.0609	1.59597	3.02298	0.284672	5.60634	2.06653e-08	2.43555e-07		93.0609	-0.102063	0.931699	0.308393	-0.330952	0.74068	0.936425
C05D11.6	nas-4	8.80817	18.8709	22.3623	26.6257	23.906	23.5574	28.5948	16.2745	25.7962	28.1458	26.9278	25.5106	10.5657	16.8388	14.6614	19.5856	15.4429	16.6124	2.04284	3.3969	4.34351	5.35118	2.25671	8.36064		16.4516	0.55324	1.46738	0.352723	1.56848	0.116769	0.193592		16.4516	0.184699	1.13658	0.355879	0.518995	0.603764	0.661425		16.4516	0.300942	1.23195	0.392091	0.767532	0.442765	0.817134
C05D11.7	atgl-1	2128.93	2465.52	2698.13	3660.6	3797.51	3837.23	3041.54	2901.65	2931.21	6110.95	3577.08	3852.11	3689.34	3625.31	3661.44	3554.33	4005.89	3782.74	2186.86	2762.81	2306.4	2701.28	2806.22	2930.4		3292.31	0.631081	1.54872	0.157649	4.00308	6.25239e-05	0.00029475		3292.31	0.608332	1.5245	0.157728	3.85683	0.000114865	0.000415761		3292.31	0.0473903	1.03339	0.15755	0.300795	0.763571	0.945072
C05D11.8	C05D11.8	951.282	1276.66	1580.78	2136.92	2133.83	2026.81	1089.46	1167.93	1153.19	1354.31	1097.58	1064.79	1951.77	1998.87	2008.61	1748.72	1954.04	1851.79	703.759	892.252	803.549	808.029	811.286	748.277		1388.1	0.724835	1.65271	0.147501	4.91409	8.9198e-07	6.72283e-06		1388.1	0.0420195	1.02955	0.149527	0.281017	0.778697	0.816404		1388.1	-0.101543	0.932036	0.147399	-0.688898	0.490887	0.844144
C05D12.1	C05D12.1	120.672	139.48	160.392	216.441	244.372	211.144	202.07	197.209	156.688	86.093	141.102	116.462	46.1048	38.6303	37.1422	44.7672	28.8268	40.0652	279.869	204.946	234.549	268.629	223.414	257.09		154.007	0.673892	1.59537	0.184843	3.64576	0.000266607	0.00105945		154.007	-0.675761	0.626002	0.196258	-3.44322	0.000574832	0.00161891		154.007	-0.095824	0.935738	0.248817	-0.385119	0.700149	0.924865
C05D2.1	daf-4	1131.85	1339.01	1708.79	1650.79	1627.38	1669.08	1059.92	1157.4	956.371	642.387	766.903	848.506	1899.9	1907.74	2048.69	1819.6	2014.79	1925.08	1651.64	1339.51	1501.77	1430.91	1376.59	1346.06		1450.86	0.242696	1.1832	0.139298	1.74227	0.0814612	0.144318		1450.86	-0.487903	0.713061	0.142918	-3.41386	0.000640493	0.00178136		1450.86	-0.0241465	0.983402	0.139025	-0.173685	0.862113	0.972741
C05D2.10	wdr-37	2394.94	2319.48	1839.11	1510.79	1673.42	1697.88	1988.29	2051.54	2058.92	5023.2	3108.54	2862.74	1317.83	1395.64	1484.71	1315.04	1478.4	1471.66	1451.44	1685.99	1575.61	1864.35	2100.99	1885.32		1981.49	-0.42464	0.745024	0.165465	-2.56635	0.0102776	0.0256321		1981.49	0.848807	1.80101	0.165268	5.13594	2.80731e-07	2.31352e-06		1981.49	0.0227393	1.01589	0.166455	0.13661	0.891339	0.980796
C05D2.4	bas-1	209.634	213.323	230.563	197.545	232.862	215.506	284.995	312.087	316.242	142.385	240.196	190.775	205.551	199.095	205.26	199.587	171.931	192.508	478.025	321.573	364.855	321.071	295.629	342.786		253.499	-0.0176997	0.987806	0.167238	-0.105836	0.915713	0.947425		253.499	-0.656295	0.634506	0.171046	-3.83695	0.00012457	0.000446814		253.499	-0.112014	0.925295	0.171692	-0.652415	0.514134	0.854513
C05D2.6	madf-11	1417.23	1510.49	1436.58	1445.52	1401.6	1467.54	1481.21	1564.27	1559.24	1793.05	1374.39	1540.62	1648.25	1716.57	1848.31	1691.83	1819.18	1573.29	1379.94	1939.63	1723.29	1759.47	2032.17	1714.98		1618.28	-0.0165244	0.988612	0.127505	-0.129598	0.896884	0.933658		1618.28	0.0299408	1.02097	0.128222	0.233508	0.815367	0.847759		1618.28	-0.0361808	0.975233	0.127415	-0.28396	0.776441	0.951013
C05D2.8	C05D2.8	121.553	116.507	87.9069	97.9137	81.4575	109.062	537.583	577.266	557.007	418.876	542.864	529.069	288.155	315.976	321.573	414.096	350.04	372.313	278.848	140.405	209.574	253.646	233.569	251.864		300.297	-0.173603	0.886626	0.203923	-0.851314	0.394595	0.511838		300.297	-0.161867	0.893868	0.18163	-0.891188	0.372828	0.437847		300.297	0.296426	1.2281	0.184427	1.60728	0.107993	0.50796
C05D9.3	C05D9.3	1085.17	1196.25	1206.02	1239.38	1356.44	1311.36	1616.56	1704.99	1712.1	895.699	1248.37	1365.37	1693.39	1790.86	1490.58	1558.46	1625.62	1579.16	1170.55	1162.87	1278.08	1164.42	1296.48	1168.4		1371.52	0.163718	1.12017	0.127437	1.28469	0.198899	0.296991		1371.52	-0.51602	0.699298	0.128192	-4.02536	5.68887e-05	0.000230212		1371.52	-0.0627407	0.957444	0.126966	-0.494152	0.621199	0.896322
C05D9.5	ife-4	2261.94	1579.41	1054.11	749.813	764.992	755.581	963.646	984.128	1024.21	710.268	792.753	798.594	1318.79	1251.03	1024.34	1445.61	1211.75	1151.14	859.015	846.96	1005.52	979.266	1065.17	903.994		1062.58	-1.10804	0.463922	0.1897	-5.84103	5.18794e-09	6.44291e-08		1062.58	-0.367812	0.774957	0.191466	-1.92103	0.0547282	0.0810767		1062.58	0.0836774	1.05972	0.18957	0.441407	0.658918	0.911508
C05D9.7	C05D9.7	1897.28	1653.25	1154.36	748.954	810.147	805.313	2108.39	2050.59	2017.84	1938.75	1797.7	1829	1756.78	1631.39	1347.87	2398.77	1997.28	1962.22	730.316	1025.86	994.663	962.143	1263.76	983.42		1494.42	-0.992335	0.502663	0.172747	-5.74444	9.22274e-09	1.08215e-07		1494.42	-0.150675	0.900829	0.171783	-0.877126	0.380418	0.445986		1494.42	0.425028	1.3426	0.171636	2.47634	0.0132738	0.20234
C05D9.9	C05D9.9	9.68898	10.6662	12.3378	20.6134	15.0519	12.2149	0.953161	6.70126	6.68791	1.65564	6.46266	7.76411	6.72361	8.91468	7.81941	13.9897	14.4134	10.7492	12.257	10.1907	5.42939	13.9131	13.5402	10.4508		9.96622	0.547449	1.4615	0.420439	1.30209	0.192886	0.289582		9.96622	0.245421	1.18544	0.614426	0.399432	0.689575	0.74057		9.96622	0.739876	1.67003	0.474765	1.5584	0.119138	0.528503
C05E11.1	lnp-1	1614.54	1445.67	1056.43	1407.72	1459.15	1371.56	1342.05	1395.78	1370.07	1605.97	1343.16	1466.31	874.07	855.81	732.092	1011.92	989.376	840.392	892.722	1329.32	1353	1293.92	1536.82	1260.37		1243.68	0.0424511	1.02986	0.165184	0.256993	0.797184	0.860954		1243.68	0.103298	1.07423	0.165914	0.622601	0.533547	0.59454		1243.68	0.206939	1.15424	0.167283	1.23706	0.216064	0.649218
C05E11.3	C05E11.3	1352.93	1181.48	997.049	1120.85	1089.94	1113.3	1869.15	1881.14	1704.46	1041.39	1604.89	1506.24	1021.03	940.004	896.3	1198.45	984.229	1108.15	876.379	745.053	807.893	806.958	768.409	777.539		1141.38	-0.0868567	0.941572	0.14651	-0.592837	0.55329	0.660344		1141.38	-0.390441	0.762896	0.146413	-2.66672	0.00765957	0.0146644		1141.38	0.204003	1.15189	0.147526	1.38283	0.166716	0.595004
C05E11.7	C05E11.7	93.3666	101.739	107.956	127.116	128.384	140.472	122.005	115.836	107.006	34.7683	86.1689	62.1129	96.0516	88.1563	84.0587	69.9487	53.5355	63.518	103.163	69.0703	105.33	56.7225	76.7281	68.9753		90.0912	0.38453	1.30543	0.202999	1.89425	0.0581921	0.109927		90.0912	-0.872474	0.546209	0.224984	-3.87793	0.000105349	0.000386605		90.0912	-0.518256	0.698215	0.222314	-2.33119	0.0197432	0.247999
C05E11.8	flp-12	131.242	121.43	68.6291	87.607	91.1969	84.632	53.377	55.5247	62.102	28.1458	42.0073	33.2748	48.0258	22.782	45.939	60.6222	16.4724	44.9512	45.9639	28.3075	26.061	25.6857	18.0537	25.0819		52.7965	-0.284527	0.821011	0.316591	-0.898721	0.368802	0.485922		52.7965	-0.711327	0.610758	0.353214	-2.01387	0.0440236	0.066968		52.7965	0.0698315	1.04959	0.349286	0.199927	0.841538	0.967705
C05E4.3	srp-1	163.832	132.917	139.572	239.631	201.873	238.191	110.567	128.281	98.4078	56.2916	90.4773	100.933	78.7623	81.2227	59.623	109.12	76.1851	83.062	80.6922	70.2026	62.9809	73.8463	54.161	78.381		108.717	0.640817	1.55921	0.193146	3.31778	0.000907362	0.00316153		108.717	-0.41989	0.747482	0.216788	-1.93686	0.052762	0.0784731		108.717	0.292155	1.22447	0.218023	1.34002	0.180239	0.610231
C05E4.4	sri-4	0	0	0	0	1.77081	0	47.6581	45.9515	47.7708	31.4571	45.2386	26.6198	8.64465	19.8104	15.6388	28.9121	26.7677	25.4072	23.4927	26.0429	20.6317	40.669	23.6954	28.2172		22.2665	1.94209	3.84262	1.57578	1.23247	0.217775	0.319974		22.2665	-0.442553	0.735831	0.307261	-1.44032	0.149778	0.197229		22.2665	0.883314	1.84461	0.355699	2.48332	0.0130165	0.201427
C05E4.9	icl-1	10117.9	11800.9	17151.9	45772.1	46668	50681.5	13963.8	15437.8	14495.6	9619.24	14142.5	11905.7	16363.4	18418.7	17707.1	13654	16861.6	17144	13707.5	13131.3	13202.1	15591.2	15376.1	15144.2		18669.1	1.87303	3.663	0.16357	11.451	2.32579e-30	2.16269e-27		18669.1	-0.29929	0.812652	0.163763	-1.82758	0.0676128	0.0978913		18669.1	-0.139265	0.907982	0.163646	-0.851014	0.394762	0.788692
C05E7.1	C05E7.1	768.072	608.791	572.937	476.685	462.182	440.61	541.396	523.656	522.612	259.935	449.155	356.04	707.901	535.872	539.539	796.482	531.236	701.63	785.473	481.227	558.141	649.634	438.93	631.228		555.807	-0.498807	0.707692	0.213237	-2.33921	0.0193243	0.0436543		555.807	-0.569964	0.673633	0.216813	-2.62883	0.00856789	0.0161695		555.807	0.186763	1.13821	0.213115	0.87635	0.38084	0.779873
C05E7.2	C05E7.2	353.207	292.089	411.003	302.33	236.404	214.634	142.021	139.769	152.866	107.616	227.27	119.789	275.668	167.398	212.102	394.511	291.356	392.834	473.939	262.693	275.813	239.733	95.9101	227.827		250.366	-0.487662	0.71318	0.298732	-1.63244	0.102586	0.174592		250.366	0.0727175	1.0517	0.309165	0.235206	0.814049	0.846794		250.366	0.719406	1.6465	0.30033	2.39539	0.0166028	0.22615
C05E7.4	frpr-2	2.64245	9.02521	4.62668	3.43557	1.77081	3.48998	1.90632	4.78661	0	4.96691	1.07711	1.10916	3.84207	2.97156	2.93228	3.7306	7.2067	1.9544	6.12852	2.2646	8.68702	4.28095	2.25671	1.04508		3.58905	-0.908978	0.532562	0.776329	-1.17087	0.241652	0.348179		3.58905	-0.0652647	0.95577	0.995851	-0.0655366	0.947747	NA		3.58905	0.391874	1.3121	0.810576	0.483452	0.628775	0.897726
C05G5.2	C05G5.2	736.363	722.837	794.247	1207.6	1235.14	1188.34	910.269	922.859	921.976	1456.96	969.4	1104.72	559.021	570.54	518.036	417.827	486.967	420.196	1029.59	1381.41	1487.65	1423.41	1523.28	1394.14		974.282	0.688093	1.61115	0.145621	4.72524	2.29847e-06	1.56865e-05		974.282	0.354443	1.27849	0.146358	2.42176	0.0154458	0.0268996		974.282	-0.31488	0.803918	0.150721	-2.08915	0.0366941	0.321004
C05G5.3	C05G5.3	590.147	434.851	333.121	218.159	232.862	236.446	297.386	289.111	304.777	150.663	221.885	236.251	416.864	410.075	326.46	529.745	389.162	384.04	229.82	150.596	182.427	205.485	213.259	214.241		299.91	-0.981153	0.506575	0.203687	-4.81697	1.45754e-06	1.04558e-05		299.91	-0.540077	0.687734	0.210069	-2.57095	0.0101419	0.0186871		299.91	0.176436	1.13009	0.202261	0.872319	0.383034	0.781625
C05G5.5	C05G5.5	280.1	302.755	298.421	304.907	332.913	326.313	657.681	641.406	583.759	299.67	408.225	479.157	255.497	210.981	215.034	235.028	233.703	211.075	195.091	158.522	211.746	168.027	194.077	166.168		307.094	0.129192	1.09368	0.153232	0.843116	0.399163	0.516593		307.094	-0.656539	0.634399	0.151401	-4.33643	1.44813e-05	7.14562e-05		307.094	-0.00395958	0.997259	0.160097	-0.0247324	0.980268	1
C05G6.1	nhr-76	109.221	127.994	125.691	117.668	115.988	103.827	19.0632	21.0611	46.8153	67.8811	58.164	68.7678	106.617	121.834	137.817	137.099	114.278	107.492	77.628	61.1442	60.8091	43.8797	54.161	68.9753		86.4116	-0.105736	0.929331	0.209579	-0.504515	0.613899	0.714902		86.4116	1.15954	2.23386	0.264901	4.37727	1.20174e-05	6.08536e-05		86.4116	-0.0280877	0.980719	0.212244	-0.132337	0.894718	0.981893
C05H8.1	ckk-1	228.131	270.756	360.11	384.784	406.402	337.656	267.838	296.77	219.745	158.941	189.571	176.356	364.036	384.322	347.964	392.645	386.073	390.88	166.492	116.627	135.735	138.061	111.707	132.725		265.18	0.392031	1.31224	0.167704	2.33764	0.0194058	0.0438014		265.18	-0.573981	0.671761	0.179042	-3.20585	0.00134665	0.00333974		265.18	0.0934406	1.06691	0.167688	0.557228	0.577372	0.87927
C06A1.2	txt-13	318.856	278.961	231.334	261.103	238.175	212.889	300.246	257.52	301.911	210.266	236.964	245.124	181.538	125.796	143.682	220.105	138.986	152.443	239.012	184.565	199.801	180.87	174.895	192.295		217.806	-0.217989	0.859763	0.179624	-1.21359	0.224905	0.328504		217.806	-0.308404	0.807535	0.183748	-1.67841	0.093268	0.130131		217.806	0.183458	1.1356	0.19007	0.965209	0.33444	0.745516
C06A1.5	rpb-6	3818.34	2661.62	1633.99	1005.76	1010.25	922.227	1639.44	1554.69	1674.84	2829.48	1960.34	2081.89	1538.75	1375.83	1483.73	1495.97	1730.64	1577.2	721.123	842.431	853.499	958.932	1187.03	890.408		1560.35	-1.4652	0.362185	0.209454	-6.99534	2.64623e-12	6.94868e-11		1560.35	0.496167	1.41046	0.209375	2.36976	0.0177998	0.0304331		1560.35	0.127143	1.09213	0.20959	0.606625	0.5441	0.8649
C06A12.3	C06A12.3	71.3461	52.5103	53.2068	79.0181	76.145	69.7996	44.7986	53.6101	37.2612	38.0796	32.3133	28.8381	39.3812	25.7535	24.4357	36.3733	35.004	30.2932	52.0925	44.1597	39.0916	25.6857	20.3104	24.0368		43.0643	0.349387	1.27402	0.2216	1.57666	0.114874	0.19126		43.0643	-0.469333	0.722299	0.269284	-1.74289	0.0813521	0.115536		43.0643	0.181169	1.1338	0.272058	0.665921	0.505462	0.849189
C06A12.5	lact-6	7.92735	8.20473	3.08445	7.73003	7.96866	4.36248	13.3443	11.4879	10.5096	26.4902	16.1567	16.6374	9.60516	9.90521	5.86456	7.46119	7.2067	2.9316	0	0	0	5.35118	1.12835	1.04508		7.68344	0.0760867	1.05415	0.550252	0.138276	0.890022	0.928416		7.68344	0.716805	1.64354	0.47291	1.51573	0.129587	NA		7.68344	-0.527595	0.69371	0.563988	-0.935472	0.349545	0.759015
C06A5.1	ints-1	1007.65	1613.87	2153.72	1546.01	1477.74	1475.39	1740.47	1671.49	1842.04	3604.32	2138.06	2319.25	1335.12	1353.05	1697.79	1073.48	1378.54	1060.26	1024.49	1647.5	1195.55	1402.01	1551.49	1463.11		1615.52	-0.086238	0.941976	0.228582	-0.377274	0.70597	0.791636		1615.52	0.616737	1.5334	0.228465	2.69948	0.00694472	0.01348		1615.52	-0.320621	0.800725	0.229196	-1.39889	0.161845	0.588733
C06A5.11	sir-2.4	663.255	575.152	303.819	170.92	207.185	190.204	349.81	336.978	350.637	900.666	515.936	501.34	177.696	170.37	154.433	178.136	183.256	163.192	184.877	170.977	217.175	271.84	357.688	266.495		315.085	-1.43952	0.368689	0.238335	-6.03991	1.54205e-09	2.23612e-08		315.085	0.882226	1.84322	0.236228	3.73464	0.000187985	0.00063207		315.085	0.0618978	1.04384	0.245817	0.251804	0.801192	0.957569
C06A5.2	C06A5.2	13.2122	9.02521	7.71113	6.87114	1.77081	4.36248	0	0	0	0	0	0	0.960516	2.97156	0.977426	0.932649	3.08858	0	0	0	0	1.07024	0	0		2.20642	-1.19693	0.436203	0.826077	-1.44893	0.147357	NA		2.20642	0	1	1.80578	0	1	NA		2.20642	-0.309432	0.806959	1.19048	-0.259923	0.794923	0.954484
C06A5.3	C06A5.3	1862.05	2055.29	1723.44	1374.23	1341.39	1328.81	3158.78	3137.15	3220.7	6478.5	3686.95	4122.74	2171.73	2291.07	2176.73	1956.7	2078.62	1921.18	795.687	883.194	921.91	989.969	979.411	1023.13		2153.31	-0.479895	0.71703	0.153139	-3.13373	0.00172601	0.00554396		2153.31	0.585063	1.5001	0.151967	3.84993	0.000118154	0.000426616		2153.31	-0.156653	0.897104	0.152797	-1.02524	0.305251	0.724308
C06A5.7	unc-94	2113.08	2413.83	2624.1	3597.04	3701	3784.88	3961.34	4084.9	3982.17	5425.52	4151.18	4108.32	2068.95	2243.53	2114.17	1689.96	2189.81	2207.5	3039.75	3195.35	2941.64	3014.86	3259.81	3033.87		3122.77	0.631908	1.54961	0.125921	5.01829	5.2134e-07	4.17465e-06		3122.77	0.185174	1.13695	0.125748	1.47258	0.140864	0.187095		3122.77	-0.078488	0.94705	0.1269	-0.618502	0.536244	0.860288
C06A6.2	C06A6.2	1576.66	1708.23	1948.6	2011.53	1972.69	2058.22	3832.66	3610.06	3631.53	8980.17	5002.1	5223.03	1635.76	1774.02	1941.17	1581.77	1886.1	1788.28	2772.14	4046.84	3669.18	3525.36	4000.01	3544.91		3071.71	0.207226	1.15447	0.183226	1.13099	0.258061	0.366498		3071.71	0.793581	1.73337	0.182378	4.35129	1.35338e-05	6.7386e-05		3071.71	-0.0258696	0.982228	0.183606	-0.140897	0.887951	0.979849
C06A6.3	mvb-12	1957.17	1695.92	1253.06	963.677	984.573	993.772	1346.82	1188.99	1384.4	4134.12	2106.83	2266.01	1427.33	1279.75	1279.45	1454	1569	1457.98	1265.54	1954.35	1607.1	1661.01	2037.81	1624.05		1620.53	-0.737576	0.599746	0.212534	-3.47039	0.000519713	0.00192729		1620.53	1.11635	2.16798	0.21219	5.2611	1.43193e-07	1.30833e-06		1620.53	0.168624	1.12399	0.212529	0.793416	0.427535	0.807496
C06A6.5	erp-44.2	2265.46	2057.75	1515.24	2103.43	1899.2	1954.39	3751.64	3914.49	3655.42	2711.93	3227.02	3445.05	2352.3	2404.98	2167.93	2523.75	2853.85	2828.99	2936.58	3375.38	3548.65	3309.17	3784.5	3304.54		2828.82	0.0294045	1.02059	0.138043	0.213009	0.83132	0.88548		2828.82	-0.269974	0.829334	0.137537	-1.96292	0.0496556	0.0743948		2828.82	0.244854	1.18497	0.137838	1.77639	0.0756684	0.437907
C06A8.2	snpc-1.1	2042.61	1781.25	1266.17	963.677	856.189	903.905	936.005	911.371	997.453	3365.91	1631.82	1650.43	749.203	701.289	783.896	752.648	850.39	633.226	564.846	812.991	694.961	732.042	888.014	723.195		1091.4	-0.901855	0.535198	0.226344	-3.98445	6.76367e-05	0.000315652		1091.4	1.22289	2.33414	0.226557	5.39772	6.74933e-08	6.8113e-07		1091.4	0.00107707	1.00075	0.228143	0.00472102	0.996233	1
C06A8.5	spdl-1	2587.84	2504.91	2247.8	3214.83	3240.59	3178.5	1665.17	1731.8	1611.79	1827.82	1461.64	1703.67	1840.35	1842.37	1531.63	1555.66	1666.81	1547.89	1119.48	1622.58	1807.99	1891.11	2120.18	1673.17		1966.48	0.392329	1.31251	0.148317	2.64521	0.00816393	0.0211187		1966.48	-0.00552115	0.99618	0.150019	-0.036803	0.970642	0.976657		1966.48	-0.12846	0.914808	0.149642	-0.858446	0.390646	0.786333
C06A8.9	glr-4	98.6515	108.302	175.043	193.251	152.29	169.264	142.974	127.324	109.873	107.616	117.405	112.025	129.67	135.701	153.456	112.851	128.691	137.785	154.235	110.965	108.588	119.866	108.322	121.229		130.641	0.42667	1.34413	0.199692	2.13664	0.032627	0.0674202		130.641	-0.170823	0.888336	0.211876	-0.80624	0.420104	0.485782		130.641	-0.143531	0.905301	0.205193	-0.699493	0.484244	0.83957
C06B3.7	C06B3.7	4.40408	1.64095	1.54223	4.29446	4.42704	6.10747	51.4707	38.2929	49.6816	44.7022	52.7784	32.1656	27.855	8.91468	20.526	31.7101	17.502	31.2704	1.02142	1.1323	5.42939	13.9131	6.77012	5.2254		19.2824	0.997151	1.99605	0.671022	1.48602	0.137274	0.221083		19.2824	-0.106326	0.928951	0.363403	-0.292585	0.769839	0.808303		19.2824	0.491573	1.40598	0.397631	1.23625	0.216365	0.649351
C06B8.7	C06B8.7	1003.25	1759.1	3299.59	4036.79	3708.08	3934.95	4705.76	5039.35	4783.76	2928.82	3736.5	3951.93	4551.89	4790.16	4104.21	3594.43	4428	3775.9	1713.94	1807.15	2052.31	2074.12	2089.71	1918.77		3324.52	0.945838	1.92631	0.246835	3.83187	0.000127173	0.00055156		3324.52	-0.452216	0.730919	0.246732	-1.83282	0.0668289	0.0968853		3324.52	-0.188649	0.877427	0.246603	-0.764993	0.444276	0.818732
C06B8.8	rpl-38	19403.5	15374	7992.59	2907.35	2834.19	2774.53	3942.28	4337.63	4429.3	3425.51	3598.63	3449.48	4248.36	3681.76	3078.89	5366.46	4083.11	4747.24	4006.01	3130.81	3560.59	3234.25	3916.52	3530.28		5043.89	-2.3283	0.199119	0.211309	-11.0185	3.11365e-28	2.31624e-25		5043.89	-0.279066	0.824124	0.211681	-1.31833	0.187393	0.23995		5043.89	0.366911	1.28959	0.211486	1.73492	0.0827549	0.456728
C06E1.1	C06E1.1	6248.51	3561.68	2294.83	2762.2	2629.66	2640.17	4186.29	4092.56	4146.5	4653.99	3810.82	4500.97	15882.1	15809.7	11444.7	18965.4	18918.6	18409.5	1329.89	3059.47	2576.79	2455.12	3157.13	2201.98		6655.77	-0.591644	0.663586	0.270455	-2.18759	0.0286996	0.0606696		6655.77	0.0613258	1.04342	0.270451	0.226754	0.820615	0.852099		6655.77	0.384058	1.30501	0.269929	1.42281	0.15479	0.57703
C06E1.10	rha-2	496.781	612.894	664.7	451.777	526.817	563.632	1089.46	1095.18	1046.18	1122.52	929.547	1064.79	1085.38	1104.43	1082.99	924.255	1018.2	957.656	902.936	1029.26	1022.9	994.25	1038.09	941.617		906.927	-0.203645	0.868354	0.123307	-1.65153	0.0986305	0.168985		906.927	-0.0538394	0.963369	0.120538	-0.446661	0.65512	0.709755		906.927	-0.174632	0.885993	0.11994	-1.45599	0.145395	0.564717
C06E1.3	doxa-1	131.242	178.043	309.216	368.465	368.329	365.575	371.733	328.362	370.701	193.709	283.28	283.945	366.917	370.455	413.451	379.588	374.748	413.356	210.413	139.273	147.679	136.99	74.4713	102.418		278.432	0.831191	1.77915	0.239682	3.46789	0.000524569	0.0019424		278.432	-0.487155	0.713431	0.241582	-2.01652	0.0437457	0.0665979		278.432	0.0210277	1.01468	0.237791	0.0884291	0.929536	0.990504
C06E1.4	glr-1	177.044	220.707	326.952	260.244	279.789	266.111	244.009	272.837	223.567	64.5698	165.875	125.335	423.588	465.545	423.226	351.609	316.065	354.724	324.812	195.888	225.862	214.047	171.51	219.467		263.058	0.151955	1.11107	0.236711	0.641943	0.52091	0.631424		263.058	-1.03621	0.487607	0.247823	-4.18126	2.89898e-05	0.000128974		263.058	-0.359983	0.779174	0.234432	-1.53555	0.124648	0.536811
C06E2.1	C06E2.1	125.076	115.687	97.9314	118.527	103.593	127.384	4.76581	5.74394	6.68791	6.62254	3.23133	6.65495	391.891	325.881	320.596	354.407	332.538	293.16	217.563	105.304	144.422	100.602	66.5729	90.9219		144.407	0.0470192	1.03313	0.226687	0.207419	0.835683	0.889108		144.407	-0.0974298	0.934697	0.563005	-0.173053	0.86261	0.888987		144.407	-0.0833098	0.94389	0.212516	-0.392016	0.695046	0.922781
C06E2.5	C06E2.5	2611.62	2078.26	1142.79	643.31	681.763	627.324	1152.37	1145.92	1157.96	1150.67	994.173	1102.5	1146.86	952.881	891.413	1308.51	1231.32	1207.82	501.518	486.889	555.969	539.399	620.595	530.9		1019.28	-1.57855	0.334818	0.194844	-8.10164	5.42227e-16	3.01017e-14		1019.28	-0.0905406	0.939171	0.195282	-0.463641	0.642905	0.698215		1019.28	0.325268	1.2529	0.194842	1.6694	0.0950386	0.482313
C06E2.7	ubc-22	21.1396	15.589	15.4223	18.8956	14.1665	22.6849	271.651	246.032	303.822	718.546	441.615	425.917	2.88155	3.96208	10.7517	21.4509	10.2953	8.7948	15.3213	10.1907	9.77289	28.8964	10.1552	17.7664		111.072	0.102516	1.07364	0.361454	0.283622	0.7767	0.844965		111.072	0.945415	1.92574	0.263136	3.59287	0.000327056	0.00101117		111.072	1.21748	2.32541	0.480193	2.5354	0.0112318	0.186061
C06E4.7	glb-2	34.3518	22.9733	22.3623	21.4723	28.333	22.6849	39.0796	49.7808	41.0829	8.27818	34.4675	26.6198	8.64465	8.91468	7.81941	10.2591	8.23622	12.7036	41.8783	16.9845	33.6622	29.9666	27.0805	31.3524		24.5412	-0.131771	0.91271	0.341088	-0.386327	0.699255	0.786224		24.5412	-0.841012	0.558252	0.347838	-2.41783	0.0156134	0.0271563		24.5412	0.30116	1.23213	0.463576	0.649646	0.515921	0.855093
C06E7.2	C06E7.2	223.727	210.862	212.827	250.797	205.414	225.976	380.311	441.326	391.72	203.643	337.136	281.726	17.2893	17.8294	14.6614	15.855	12.3543	15.6352	271.698	178.903	193.286	163.746	116.22	170.348		189.721	0.0759084	1.05402	0.195954	0.387379	0.698476	0.785719		189.721	-0.552065	0.682043	0.194746	-2.8348	0.00458542	0.00941809		189.721	-0.178844	0.88341	0.346728	-0.515805	0.605991	0.889286
C06E8.3	prk-1	205.23	219.887	228.25	278.281	332.028	307.991	300.246	292.941	319.109	1663.91	748.592	705.425	303.523	309.042	470.142	346.013	443.727	379.154	509.689	783.551	523.393	504.081	644.29	488.052		471.106	0.490731	1.40516	0.259035	1.89446	0.0581641	0.109923		471.106	1.76964	3.40969	0.255994	6.91282	4.75122e-12	2.16226e-10		471.106	0.110204	1.07938	0.257136	0.428581	0.668228	0.913902
C06E8.5	C06E8.5	92.4857	112.405	215.912	225.03	163.8	134.364	18.1101	21.0611	23.8854	11.5894	32.3133	14.4191	80.6834	70.327	120.223	73.6793	52.5059	80.1304	75.5851	48.6889	71.6679	58.863	32.7223	73.1556		79.317	0.312267	1.24166	0.324983	0.96087	0.336617	0.452575		79.317	-0.0721774	0.951201	0.416174	-0.173431	0.862313	0.888809		79.317	-0.393481	0.761291	0.339762	-1.15811	0.24682	0.676198
C06G1.1	C06G1.1	871.128	924.674	1277.73	1570.05	1643.32	1500.69	1617.51	1698.29	1607.96	740.069	1282.84	1015.99	2240.88	2184.1	2290.11	1712.34	1736.81	1743.33	2942.71	2047.2	2172.84	1618.2	1162.2	1743.19		1639.34	0.616682	1.53334	0.189787	3.24934	0.00115673	0.00389717		1639.34	-0.693454	0.618372	0.190666	-3.63701	0.000275824	0.000871249		1639.34	-0.370993	0.77325	0.189133	-1.96154	0.0498158	0.359997
C06G1.2	cpg-19	415.745	446.338	667.784	892.389	950.927	861.153	2188.46	2228.65	2317.84	741.725	1369.01	1100.29	2452.2	2561.49	2382.97	1716.07	1771.82	1928.99	3016.26	2383.49	2395.44	1491.91	1278.42	1391		1622.93	0.820935	1.76655	0.18603	4.41292	1.01988e-05	5.82261e-05		1622.93	-1.06547	0.477817	0.184221	-5.78365	7.30969e-09	9.97154e-08		1622.93	-0.449417	0.732339	0.182939	-2.45665	0.014024	0.208627
C06G1.4	ain-1	10858.7	12229.2	13608.6	16164.4	18193.3	17579.9	19104.2	21103.2	18167.2	13788.1	16189	18375.4	11834.5	12816.3	10771.2	9863.7	11000.5	9429.98	9589.1	9403.75	10204	11125.1	12648.8	11370.5		13559.1	0.50109	1.41528	0.123538	4.05617	4.9884e-05	0.000241279		13559.1	-0.271536	0.828437	0.123568	-2.19747	0.0279872	0.0450649		13559.1	-0.22563	0.855222	0.123712	-1.82384	0.0681767	0.41867
C06G3.1	nhr-105	431.6	380.7	394.81	414.845	368.329	410.073	666.26	693.102	773.886	417.22	611.799	514.65	467.771	519.033	485.781	430.884	389.162	388.926	218.584	127.95	138.992	145.552	157.97	169.303		404.883	-0.0162361	0.988809	0.163014	-0.0995995	0.920662	0.950959		404.883	-0.461558	0.726201	0.162095	-2.84746	0.00440699	0.00911638		404.883	-0.284192	0.821201	0.163393	-1.73932	0.0819789	0.455659
C06G3.11	tin-9.1	1578.42	1203.63	497.368	247.361	230.206	237.319	269.745	267.093	305.733	423.843	304.822	260.652	189.222	149.569	150.524	206.115	178.108	156.352	209.391	203.814	217.175	173.378	230.184	173.483		335.98	-2.19715	0.218068	0.267054	-8.22737	1.9137e-16	1.22724e-14		335.98	0.227315	1.17065	0.270756	0.839557	0.401157	0.467733		335.98	0.143878	1.10487	0.276003	0.521291	0.602164	0.888891
C06G4.5	npr-17	36.1135	37.7418	46.2668	42.0857	40.7287	37.5173	23.829	31.5917	13.3758	11.5894	17.2338	12.2007	119.104	103.014	124.133	151.089	113.248	100.652	111.335	75.8641	106.416	128.428	99.2951	133.77		71.526	-0.000819141	0.999432	0.257915	-0.00317601	0.997466	1		71.526	-0.721336	0.606535	0.357893	-2.01551	0.0438514	0.0667202		71.526	0.0774425	1.05515	0.220575	0.351095	0.725517	0.932313
C06G8.1	swt-3	399.891	365.931	290.71	261.103	270.049	242.554	539.489	549.503	535.988	153.974	161.567	215.177	456.245	364.512	326.46	205.183	156.488	182.736	331.962	394.04	432.179	244.014	229.056	241.413		314.593	-0.448314	0.732899	0.164819	-2.72003	0.00652757	0.0175682		314.593	-1.60712	0.328252	0.171328	-9.38038	6.57341e-21	5.21855e-18		314.593	-1.07408	0.474975	0.169427	-6.33944	2.30596e-10	4.99867e-08
C06G8.2	pept-2	114.506	163.274	237.503	249.938	290.414	280.071	124.864	144.556	147.134	62.9141	102.326	88.7327	154.643	148.578	154.433	127.773	145.163	152.443	288.041	175.506	162.882	189.432	122.991	165.123		166.385	0.668273	1.58917	0.236944	2.82039	0.00479653	0.0134516		166.385	-0.698441	0.616238	0.256204	-2.72612	0.00640839	0.0125757		166.385	-0.105994	0.929164	0.244624	-0.433294	0.664801	0.913293
C06G8.3	zipt-2.1	196.422	186.247	220.538	261.962	263.851	244.299	752.044	803.194	698.408	344.372	508.396	519.086	486.021	466.535	488.713	525.081	534.325	569.708	319.705	244.577	271.469	261.138	214.387	266.495		401.957	0.351557	1.27594	0.154563	2.27452	0.0229346	0.0502683		401.957	-0.707465	0.612395	0.146601	-4.82577	1.3946e-06	9.4271e-06		401.957	0.176673	1.13027	0.146128	1.20903	0.226653	0.660374
C06H2.2	C06H2.2	782.165	632.585	489.657	381.348	385.152	400.475	704.386	701.718	750.956	1018.22	704.43	814.122	770.334	789.445	818.106	757.311	844.213	733.877	461.682	538.974	472.357	500.871	586.744	506.864		647.75	-0.705473	0.613241	0.157325	-4.48418	7.31962e-06	4.34909e-05		647.75	0.230174	1.17298	0.155774	1.47761	0.139511	0.185625		647.75	-0.0261939	0.982008	0.15499	-0.169004	0.865794	0.974243
C06H2.3	jmjd-5	815.636	646.533	321.554	204.416	164.686	191.949	363.155	325.49	329.618	513.247	361.909	337.184	470.653	533.891	572.772	729.332	556.975	598.047	124.613	167.58	153.109	180.87	222.286	169.303		377.284	-1.66762	0.314772	0.241635	-6.90139	5.14966e-12	1.2727e-10		377.284	0.247453	1.18711	0.241538	1.02449	0.305605	0.367767		377.284	0.256889	1.1949	0.237824	1.08017	0.280068	0.703836
C06H2.6	lmtr-3	2786.02	1982.26	1356.39	1308.95	1290.04	1243.31	1333.47	1173.68	1371.02	5000.02	2676.62	2231.63	1205.45	1126.22	1466.14	1711.41	1700.78	1577.2	1160.33	1542.19	1286.76	1519.74	1756.85	1332.48		1714.12	-0.672449	0.627441	0.24291	-2.76831	0.00563486	0.0154279		1714.12	1.35227	2.55313	0.24297	5.56558	2.61286e-08	2.95393e-07		1714.12	0.393692	1.31375	0.243303	1.61811	0.105638	0.502808
C06H2.7	C06H2.7	773.357	689.198	545.948	482.697	455.985	465.04	1215.28	909.457	1306.05	10832.8	4137.18	3717.9	453.364	510.118	952.991	589.434	682.577	579.48	281.912	458.581	297.53	477.326	608.183	435.798		1327.43	-0.516664	0.698986	0.313099	-1.65016	0.0989101	0.16942		1327.43	2.44503	5.44535	0.310815	7.86651	3.64679e-15	6.05961e-13		1327.43	-0.0498247	0.966054	0.313122	-0.159123	0.873572	0.976793
C06H5.6	C06H5.6	212.277	242.04	239.816	196.686	253.226	239.064	456.564	463.344	398.408	220.2	347.907	357.149	156.564	154.521	147.591	121.244	184.286	158.306	232.884	186.829	219.347	181.94	161.355	190.205		238.406	-0.011672	0.991942	0.178151	-0.0655171	0.947762	0.967833		238.406	-0.50043	0.706896	0.176013	-2.84314	0.00446712	0.00921142		238.406	0.0137049	1.00954	0.188321	0.0727742	0.941986	0.994413
C06H5.8	C06H5.8	41.3984	39.3827	38.5557	36.9324	25.6768	38.3898	63.8618	53.6101	48.7262	21.5233	36.6218	36.6022	20.1708	10.8957	19.5485	13.0571	20.5906	18.5668	123.592	129.082	115.103	132.709	115.092	129.59		55.3866	-0.238152	0.847831	0.244364	-0.974579	0.329769	0.44538		55.3866	-0.770549	0.586194	0.256902	-2.99939	0.00270521	0.00600457		55.3866	0.0343883	1.02412	0.326593	0.105294	0.916142	0.984963
C07A12.1	ham-2	938.95	1153.59	1167.47	1433.49	1514.93	1457.07	2115.07	2397.14	2119.11	1379.14	1688.91	2000.92	1722.21	1855.24	1577.57	1523.02	2072.44	1853.75	1299.25	1502.56	1718.94	1144.08	1428.5	1092.11		1589.81	0.434131	1.3511	0.159316	2.72496	0.00643084	0.0173518		1589.81	-0.386054	0.76522	0.158958	-2.42865	0.015155	0.0264974		1589.81	0.0798714	1.05692	0.158783	0.503023	0.614948	0.894168
C07A12.2	C07A12.2	29.9478	31.178	23.9045	52.3924	43.3849	34.0273	53.377	41.1649	46.8153	19.8676	44.1615	24.4015	118.144	102.024	99.6975	124.042	122.514	110.424	72.5209	57.7473	62.9809	113.445	139.916	140.041		71.1716	0.614972	1.53153	0.249964	2.46025	0.0138842	0.033104		71.1716	-0.632046	0.645261	0.26613	-2.37495	0.0175513	0.0300514		71.1716	0.15807	1.11579	0.200926	0.786709	0.431452	0.810551
C07A12.3	nhr-35	746.052	701.505	828.947	1356.19	1296.24	1298.27	990.335	950.622	916.243	1018.22	903.696	964.968	418.785	416.019	434.955	321.764	379.896	320.522	969.328	1004.35	994.663	893.648	935.405	824.568		828.549	0.794829	1.73487	0.0986277	8.05888	7.69954e-16	4.06219e-14		828.549	0.0126941	1.00884	0.100641	0.126132	0.899628	0.918793		828.549	-0.314232	0.804279	0.110049	-2.85538	0.00429858	0.101599
C07A12.4	pdi-2	56214.6	60669.1	53172.9	59467.1	64233.6	60213.5	95110.3	105728	95975.3	60806.5	73307.1	82123.2	64686.9	73277.7	62670.6	60758.4	71451.3	66878.6	56524.4	64038.3	71768.9	59236.5	72259.8	58910.1		68728.4	0.11302	1.08149	0.130318	0.867263	0.385798	0.503494		68728.4	-0.456896	0.728552	0.130314	-3.50612	0.000454691	0.0013342		68728.4	-0.0111707	0.992287	0.130319	-0.0857178	0.931691	0.991097
C07A12.7	C07A12.7	1623.34	1483.42	1718.04	2159.25	2231.23	2281.57	2124.6	2187.48	2035.99	2253.32	2094.98	2132.91	1467.67	1661.1	1565.84	2009.86	1645.19	1694.47	1750.72	1718.83	1768.89	1847.23	1940.77	1911.45		1887.84	0.467517	1.38273	0.0945297	4.94572	7.58648e-07	5.81213e-06		1887.84	0.0291295	1.0204	0.0950342	0.306516	0.759212	0.799612		1887.84	0.188889	1.13989	0.0955102	1.97768	0.0479647	0.3579
C07A4.1	rnp-9	99.5323	106.662	157.307	113.374	135.467	116.042	80.0656	66.0553	73.567	23.1789	58.164	42.148	179.617	186.218	170.072	158.55	159.577	173.942	198.156	125.685	138.992	117.726	102.68	130.635		121.392	0.00209802	1.00146	0.213702	0.00981751	0.992167	0.996857		121.392	-0.784431	0.580581	0.255902	-3.06536	0.00217407	0.00499472		121.392	-0.123091	0.918218	0.209572	-0.587343	0.556973	0.870931
C07A4.2	C07A4.2	20.2588	22.9733	20.8201	11.1656	23.906	19.1949	17.1569	22.9757	21.0191	16.5564	37.6989	26.6198	4.80258	5.94312	6.84198	7.46119	7.2067	7.8176	18.3856	16.9845	17.374	14.9833	13.5402	15.6762		16.5568	-0.242412	0.845331	0.345334	-0.701965	0.482701	0.596381		16.5568	0.44382	1.3602	0.350578	1.26597	0.205525	0.260461		16.5568	0.356354	1.28019	0.514934	0.692038	0.488913	0.842807
C07A9.1	clec-162	0	0.820473	0.771113	0	0	0.872495	3.81265	0	2.86625	1.65564	4.30844	3.32748	182.498	169.379	173.004	255.546	195.61	233.551	2.04284	2.2646	4.34351	4.28095	2.25671	3.13524		51.9311	-0.809132	0.570725	1.57025	-0.515289	0.606351	0.707774		51.9311	0.555648	1.46983	0.77186	0.719881	0.471598	0.535958		51.9311	0.384271	1.3052	0.208956	1.839	0.065915	0.411266
C07A9.11	ncx-7	88.0817	95.9954	126.463	84.1714	68.1763	76.7796	55.2834	37.3356	47.7708	16.5564	22.6193	25.5106	128.709	169.379	168.117	87.669	99.8642	87.948	32.6855	19.2491	45.6068	31.0369	14.6686	20.9016		68.7741	-0.440676	0.736789	0.233017	-1.89118	0.0586008	0.110446		68.7741	-1.08931	0.469985	0.307193	-3.54603	0.000391089	0.00117854		68.7741	-0.759516	0.590695	0.229408	-3.31076	0.000930419	0.035652
C07A9.2	bud-31	5284.9	3516.55	2099.74	1209.32	1155.46	1176.12	692.948	640.449	728.026	2198.68	1135.27	1181.25	940.346	804.303	785.851	1484.78	1062.47	1031.92	654.731	1068.89	936.026	1150.5	1471.37	1127.64		1397.4	-1.62217	0.324847	0.267499	-6.06421	1.32604e-09	1.94949e-08		1397.4	1.12955	2.18791	0.269148	4.19678	2.7074e-05	0.000122047		1397.4	0.500306	1.41451	0.268809	1.8612	0.0627163	0.402413
C07A9.3	tlk-1	7619.94	9667.64	10414.7	13795.5	15028	14146.6	15320.2	14544.6	15174.9	36230.3	18918.4	21257	8443.9	8656.16	9105.7	7671.04	8390.65	7036.82	5247.04	6980.63	7309.04	6820.62	7058.98	6546.38		11724.4	0.633297	1.55111	0.18678	3.3906	0.000697393	0.00251718		11724.4	0.762304	1.6962	0.186713	4.08277	4.45027e-05	0.000186272		11724.4	-0.182095	0.881422	0.186945	-0.974059	0.330027	0.742521
C07A9.4	ncx-6	106.579	112.405	101.787	22.3312	22.1352	25.3024	2.85948	2.87197	1.91083	0	3.23133	0	27.855	26.7441	25.4131	38.2386	41.1811	44.9512	15.3213	14.7199	21.7175	16.0535	18.0537	16.7213		29.516	-2.20054	0.217556	0.251167	-8.76125	1.93098e-18	1.79557e-16		29.516	-1.051	0.482635	0.993935	-1.05741	0.290325	0.351528		29.516	0.635339	1.5533	0.27111	2.34348	0.0191049	0.243612
C07B5.3	C07B5.3	13.2122	9.84568	5.39779	3.43557	8.85407	10.4699	18.1101	18.1891	19.1083	13.2451	16.1567	17.7465	29.776	17.8294	25.4131	48.4978	33.9744	35.1792	174.663	143.802	140.078	239.733	218.901	247.684		62.8876	-0.305772	0.809009	0.416298	-0.734504	0.462642	0.576952		62.8876	-0.210502	0.864236	0.349519	-0.602264	0.546999	0.607351		62.8876	0.690389	1.61372	0.278074	2.48275	0.0130371	0.201427
C07B5.6	C07B5.6	81.0351	52.5103	40.0979	52.3924	58.4369	47.9872	40.9859	39.2502	38.2166	46.3578	34.4675	44.3663	83.5649	58.4407	31.2776	59.6895	47.3583	40.0652	60.2638	44.1597	71.6679	40.669	71.0863	55.3892		51.6557	-0.123918	0.917692	0.302494	-0.409656	0.682058	0.772743		51.6557	0.0707643	1.05027	0.328699	0.215286	0.829544	0.860294		51.6557	-0.235515	0.849382	0.309388	-0.76123	0.44652	0.82001
C07C7.1	C07C7.1	8.80817	6.56379	8.48225	12.0245	11.5103	8.72495	18.1101	23.9331	14.3312	19.8676	11.8482	18.8557	9.60516	11.8862	3.90971	8.39384	5.14764	8.7948	19.407	15.8522	11.9446	16.0535	13.5402	35.5327		13.4636	0.436701	1.35351	0.471688	0.925825	0.354537	0.471638		13.4636	-0.176863	0.884625	0.426601	-0.414586	0.678445	0.731034		13.4636	-0.177659	0.884136	0.514965	-0.344993	0.730099	0.933479
C07D10.2	bath-44	1526.46	1625.36	1686.42	2051.03	2088.68	2078.28	1799.57	1897.41	1808.6	1859.28	1588.74	1786.85	2086.24	2056.32	2483.64	1984.68	2401.89	2231.93	1109.26	1733.55	1418.16	1293.92	1575.18	1281.27		1810.53	0.361852	1.28507	0.142339	2.54219	0.011016	0.0272523		1810.53	-0.0734525	0.950361	0.14312	-0.513223	0.607795	0.664936		1810.53	-0.00181571	0.998742	0.142227	-0.0127663	0.989814	1
C07D10.4	nas-7	424.554	391.366	522.044	516.194	464.839	501.685	375.546	370.484	350.637	117.55	200.343	163.046	1546.43	1376.82	1451.48	1303.84	1096.45	1311.4	686.395	408.76	475.614	361.74	222.286	335.471		623.957	0.14782	1.10789	0.19782	0.747245	0.454915	0.569608		623.957	-1.17634	0.442474	0.209476	-5.61561	1.95872e-08	2.33335e-07		623.957	-0.237019	0.848496	0.194012	-1.22167	0.221831	0.655386
C07D10.5	C07D10.5	6033.59	5739.21	4026.75	5431.63	5199.11	5474.91	695.808	650.98	619.109	836.096	607.49	687.678	2828.72	2823.97	2421.09	3869.56	3352.14	3256.03	1190.98	1705.24	1815.59	1786.22	2103.25	1672.13		2701.14	0.027774	1.01944	0.170592	0.162809	0.870669	0.914688		2701.14	0.113509	1.08186	0.176468	0.643229	0.520075	0.581433		2701.14	0.376054	1.29779	0.17125	2.19593	0.0280969	0.284984
C07E3.1	stip-1	1289.52	1539.21	1303.18	922.45	1027.96	935.315	876.909	858.719	928.664	1922.19	1101.88	1217.86	141.196	152.54	126.088	143.628	161.636	141.694	576.081	961.322	835.039	869.032	944.432	826.658		825.133	-0.517919	0.698378	0.187595	-2.76084	0.00576525	0.0157386		825.133	0.668263	1.58916	0.188474	3.54566	0.000391636	0.0011792		825.133	0.0898421	1.06425	0.208687	0.430511	0.666824	0.913674
C07E3.2	pro-2	1676.19	1715.61	1391.86	1056.44	1058.95	1081.89	1606.08	1564.27	1569.75	1622.52	1296.84	1504.02	37.4601	31.6967	31.2776	27.0468	24.7087	24.43	972.393	1072.29	1144.51	1085.22	1182.51	972.969		989.622	-0.581013	0.668494	0.123695	-4.69713	2.63839e-06	1.77781e-05		989.622	-0.101458	0.93209	0.124076	-0.817709	0.413524	0.479803		989.622	-0.397963	0.758929	0.247567	-1.6075	0.107946	0.50796
C07E3.3	C07E3.3	275.696	337.215	614.577	962.818	979.26	908.267	920.754	1007.1	995.543	498.346	886.462	685.46	997.016	1114.34	1069.3	1038.97	1064.53	1050.49	1310.48	1023.6	1109.77	1260.74	809.03	1250.96		923.78	1.2141	2.31996	0.232141	5.23001	1.69505e-07	1.50651e-06		923.78	-0.494994	0.709565	0.23199	-2.13369	0.0328682	0.0517618		923.78	-0.012139	0.991621	0.230526	-0.0526581	0.958004	0.998861
C07E3.6	ceh-58	1750.18	1519.52	1445.84	2455.57	2423.36	2340.03	2937.64	2823.15	2850.96	4109.29	2713.24	3061.28	1502.25	1493.7	1344.94	1624.67	1649.3	1506.84	1711.9	1701.85	1800.38	1763.75	1818.91	1683.62		2084.67	0.614654	1.53119	0.127273	4.82941	1.36938e-06	9.87097e-06		2084.67	0.196996	1.14631	0.126821	1.55333	0.120343	0.162728		2084.67	0.139237	1.10132	0.128366	1.08469	0.27806	0.702745
C07E3.9	C07E3.9	259.841	215.785	104.1	84.1714	67.2909	88.122	343.138	331.234	299.045	407.286	365.141	351.603	220.919	204.047	146.614	315.235	224.437	221.824	123.592	127.95	117.275	169.097	163.611	133.77		211.88	-1.27182	0.414136	0.247593	-5.13675	2.79537e-07	2.39296e-06		211.88	0.206013	1.1535	0.234886	0.877076	0.380445	0.445986		211.88	0.414565	1.3329	0.238734	1.73651	0.082473	0.456399
C07F11.1	tol-1	1319.46	2410.55	3889.5	4248.08	4468.65	3967.24	3421.85	3501.89	3437.58	5584.46	3344.43	3981.88	6048.37	5991.66	6992.51	5101.59	6446.9	5685.35	4959	5923.06	5159	5493.52	5736.55	5377.98		4687.13	0.734987	1.66438	0.241969	3.03752	0.00238531	0.00735792		4687.13	0.316918	1.24567	0.242031	1.30941	0.190396	0.243404		4687.13	-0.143246	0.90548	0.241673	-0.592726	0.553365	0.870615
C07F11.2	C07F11.2	17.6163	22.1528	23.1334	29.2023	23.0206	29.6648	8.57845	8.61591	10.5096	33.1127	17.2338	25.5106	31.697	18.8199	14.6614	19.5856	15.4429	19.544	36.7711	24.9106	41.2633	43.8797	33.8506	53.2991		25.0865	0.377016	1.29865	0.322488	1.16909	0.242369	0.348874		25.0865	1.41712	2.67052	0.40209	3.52438	0.000424474	0.00126527		25.0865	-0.255552	0.837667	0.350796	-0.728491	0.466313	0.829718
C07G1.1	svh-1	32.5902	35.2804	66.3157	63.558	54.8952	52.3497	22.8759	27.7624	15.2866	13.2451	19.388	7.76411	23.0524	27.7346	28.3454	18.653	24.7087	23.4528	60.2638	46.4243	42.3492	61.0035	51.9043	55.3892		36.4414	0.340839	1.26649	0.277123	1.22992	0.218727	0.320879		36.4414	-0.699737	0.615685	0.384038	-1.82205	0.0684475	0.0989794		36.4414	-0.246841	0.84274	0.33124	-0.745202	0.456149	0.824462
C07G1.4	wsp-1	1746.66	2061.03	2879.34	3126.37	3570.85	3188.97	3337.02	3425.3	3599.05	5804.66	3644.94	3880.95	2808.55	3140.94	3384.83	2570.38	2916.65	2738.12	4149.01	4170.26	4141.54	3781.15	3822.86	3417.41		3387.78	0.563758	1.47811	0.171529	3.28667	0.0010138	0.00346265		3387.78	0.362637	1.28577	0.171388	2.11589	0.0343546	0.0537589		3387.78	-0.182541	0.88115	0.171603	-1.06374	0.287448	0.708227
C07G1.5	hgrs-1	1928.11	1996.21	2282.5	1953.12	2070.08	1944.79	4076.67	4073.41	4154.15	8826.19	4962.25	5658.93	3697.99	4027.46	3803.17	3119.71	3555.99	2741.05	2821.16	3963.05	3698.5	3665.56	4021.45	3439.36		3603.37	-0.0567134	0.961452	0.174191	-0.325583	0.74474	0.821124		3603.37	0.659718	1.57977	0.17338	3.80505	0.000141774	0.000500483		3603.37	-0.291961	0.816791	0.173651	-1.68131	0.0927021	0.476189
C07G2.1	cpg-1	2543.8	2860.17	2445.97	3464.77	3610.69	4109.45	29245.9	24117.8	33437.6	253660	101142	89241.8	1628.08	1621.48	2096.58	1975.35	2829.14	2984.37	1023.46	1927.17	1243.33	1818.33	1927.23	1601.06		23856.5	0.510804	1.42484	0.284395	1.79611	0.0724774	0.13115		23856.5	2.35489	5.11554	0.283776	8.29841	1.05511e-16	3.14115e-14		23856.5	0.542869	1.45687	0.284854	1.90578	0.0566787	0.38429
C07G2.2	atf-7	5332.46	5671.11	6108.76	9087.94	9508.39	8900.32	8404.98	8596.76	8017.84	8582.81	7158.48	7494.58	5233.85	5549.89	5107.05	4816.2	5137.34	4936.82	7262.3	7593.2	8236.38	7784.9	7566.74	7351.09		7060.01	0.684107	1.60671	0.0899349	7.60669	2.81206e-14	1.07276e-12		7060.01	-0.107351	0.928291	0.0900895	-1.19161	0.233416	0.290803		7060.01	-0.0938515	0.937018	0.0904811	-1.03725	0.29962	0.720055
C07G2.3	cct-5	7930.87	7808.45	6038.59	8782.17	9094.02	9275.5	4694.32	4449.64	4793.32	10039.8	5856.25	5677.78	4008.23	4299.85	4466.84	3916.19	4475.36	4352.45	5453.37	6467.69	5473.91	6504.9	6778.02	6263.16		6120.86	0.31822	1.24679	0.169573	1.8766	0.0605731	0.113188		6120.86	0.629617	1.54715	0.169928	3.7052	0.000211222	0.000696426		6120.86	-0.0035243	0.99756	0.170083	-0.0207211	0.983468	1
C07H4.2	clh-5	1612.78	1882.17	1912.36	2098.27	2117.89	1967.48	2401.97	2495.74	2362.74	5054.65	2920.05	3072.37	1956.57	1882.98	1968.54	1704.88	2048.76	2021.83	1878.39	2425.39	2146.78	2286.03	2350.36	2082.84		2277.16	0.19342	1.14347	0.164947	1.17262	0.240949	0.347436		2277.16	0.604128	1.52006	0.164657	3.66901	0.000243492	0.00078612		2277.16	-0.00823908	0.994305	0.165226	-0.0498655	0.96023	0.998861
C07H6.3	cls-1	611.287	713.812	981.627	989.444	969.521	992.899	1252.45	1441.73	1243.95	680.466	993.096	1035.95	1077.7	1269.85	958.855	970.888	1247.79	1084.69	1664.92	1483.31	1649.45	1650.3	1611.29	1631.37		1175.28	0.355028	1.27901	0.17228	2.06077	0.039325	0.0787453		1175.28	-0.53615	0.689609	0.172643	-3.10553	0.00189937	0.00447001		1175.28	-0.00152696	0.998942	0.171913	-0.00888218	0.992913	1
C07H6.4	sap-140	2399.34	2563.16	2076.61	1498.77	1856.7	2008.48	2514.44	2442.13	2669.43	6248.37	3404.75	3925.31	541.731	587.379	676.379	534.408	593.008	528.665	1235.92	1881.88	1597.33	1655.66	2086.33	1413.99		1955.84	-0.392073	0.762034	0.202512	-1.93605	0.0528611	0.101349		1955.84	0.831538	1.77958	0.202202	4.1124	3.91562e-05	0.000166828		1955.84	-0.12473	0.917176	0.206847	-0.603006	0.546505	0.865984
C07H6.6	clk-2	305.643	426.646	432.595	430.305	424.995	403.965	571.897	567.692	626.752	1564.58	751.823	821.887	753.045	742.89	1103.51	664.046	877.158	790.555	620.002	776.757	813.322	755.587	768.409	731.556		696.901	0.111777	1.08056	0.225057	0.496659	0.61943	0.719765		696.901	0.825605	1.77228	0.222965	3.70285	0.000213191	0.000701313		696.901	-0.157011	0.896881	0.222247	-0.706473	0.479894	0.838008
C07H6.8	cux-7	963.613	978.825	799.644	419.139	448.901	517.39	496.597	442.283	467.198	1013.25	561.175	728.717	253.576	311.023	307.889	258.344	306.799	262.867	163.427	215.137	215.004	207.626	241.468	184.979		448.536	-0.984762	0.505309	0.181535	-5.42463	5.8074e-08	5.74485e-07		448.536	0.707156	1.63258	0.183278	3.85838	0.000114142	0.000413772		448.536	-0.0758745	0.948767	0.189239	-0.400945	0.68846	0.921002
C08B11.1	zyg-11	1596.92	2047.9	1916.99	1684.29	1686.7	1612.37	2226.59	1842.85	2282.49	12364.3	4762.98	4505.4	2992.01	2944.82	3111.15	2527.48	2902.24	2738.12	1475.95	2377.83	1543.03	1768.03	1831.32	1742.15		2770.16	-0.15849	0.895963	0.259673	-0.610343	0.541634	0.650713		2770.16	1.76739	3.40438	0.259217	6.81819	9.21973e-12	3.62019e-10		2770.16	-0.147666	0.90271	0.25929	-0.569501	0.569016	0.876752
C08B11.2	hda-2	1569.62	1393.16	986.254	728.341	709.211	750.346	568.084	572.479	574.205	1102.65	695.814	737.59	1539.71	1550.16	1863.95	1589.23	1932.42	1558.63	866.165	1595.41	1209.67	1545.42	1903.53	1544.63		1211.95	-0.851662	0.554146	0.207514	-4.10412	4.0586e-05	0.000199814		1211.95	0.561493	1.4758	0.209782	2.67656	0.00743832	0.0143022		1211.95	0.0362784	1.02547	0.206421	0.17575	0.86049	0.97253
C08B11.3	swsn-7	6841.3	8624.82	9423	13166	13685.7	13345.7	12983	12548.6	12833.1	24786.5	14549.6	16778.2	9147	9213.82	9572.91	7048.96	8997.05	7254.73	5807.8	9826.09	8831.44	8491.26	8946.72	7897.67		10858.4	0.691546	1.61501	0.188705	3.66469	0.000247635	0.000995222		10858.4	0.548404	1.46247	0.188666	2.90674	0.00365212	0.00778007		10858.4	-0.261662	0.834126	0.188827	-1.38572	0.165832	0.593974
C08B11.4	nrf-6	319.736	382.341	272.974	314.355	294.841	329.803	497.55	549.503	470.064	582.784	459.926	520.195	414.943	419.981	391.948	427.153	499.321	524.757	651.666	653.337	691.704	855.119	901.555	896.678		513.426	-0.0534701	0.963616	0.13571	-0.394002	0.69358	0.782258		513.426	0.0381663	1.02681	0.133165	0.286608	0.774413	0.812471		513.426	0.241757	1.18243	0.133365	1.81275	0.0698712	0.424118
C08B11.7	ubh-4	3169.18	2447.47	1503.67	891.53	893.376	952.765	1505.04	1436.94	1466.56	1774.84	1465.95	1602.73	1766.39	1484.79	1425.09	2061.15	1877.86	1775.57	1920.27	2637.13	2619.14	2414.45	3007.06	2277.23		1849.01	-1.37871	0.384562	0.197015	-6.99803	2.59595e-12	6.84796e-11		1849.01	0.135148	1.09821	0.19726	0.685127	0.493263	0.556508		1849.01	0.2893	1.22205	0.196728	1.47056	0.141411	0.560172
C08B11.9	C08B11.9	1872.62	1403.83	805.042	381.348	403.746	400.475	514.707	488.235	536.943	1433.78	804.602	745.355	689.651	680.488	575.704	921.457	674.341	657.656	444.318	455.184	542.939	464.483	516.786	458.79		703.02	-1.78317	0.290543	0.24323	-7.33123	2.28057e-13	7.40836e-12		703.02	0.951485	1.93386	0.243709	3.90418	9.45456e-05	0.00035405		703.02	0.211968	1.15827	0.243224	0.871493	0.383485	0.781939
C08B6.13	srxa-19	2.64245	2.46142	3.85557	5.15335	0.885407	0.872495	44.7986	40.2076	41.0829	23.1789	34.4675	17.7465	6.72361	6.93364	9.77426	10.2591	13.3839	17.5896	0	2.2646	1.08588	3.21071	0	0		12.0241	-0.373037	0.772155	0.736376	-0.506585	0.612446	0.713545		12.0241	-0.733355	0.601504	0.377285	-1.94377	0.0519233	0.0773544		12.0241	0.813019	1.75688	0.477777	1.70167	0.0888176	0.468415
C08B6.4	C08B6.4	4132.79	4323.9	5150.27	2913.36	2699.61	2632.32	7511.87	7260.34	6769.12	3932.13	6584.38	4842.59	7881.04	7700.31	8293.46	8487.11	8631.56	10841.1	7735.22	5516.56	4383.69	2761.21	2257.84	2877.1		5671.62	-0.722744	0.605944	0.190811	-3.78775	0.000152021	0.000646218		5671.62	-0.487528	0.713246	0.1906	-2.55786	0.0105319	0.0193248		5671.62	0.22786	1.1711	0.190317	1.19727	0.231203	0.662763
C08B6.7	wdr-20	1992.41	2627.16	3286.48	2988.09	3115.75	2919.37	4178.66	3736.43	4134.08	19389.1	8513.48	8631.47	3554.87	3645.12	4062.18	3322.1	3593.05	3257.01	3522.88	4731.88	3891.78	4245.63	4535.98	4090.44		4665.23	0.190552	1.1412	0.230701	0.825973	0.408819	0.52498		4665.23	1.59996	3.03136	0.23031	6.94701	3.73121e-12	1.75391e-10		4665.23	-0.146872	0.903206	0.23062	-0.636859	0.524216	0.856202
C08B6.8	C08B6.8	2773.69	2044.62	987.025	499.016	455.985	459.805	315.496	285.282	306.688	387.419	277.895	282.835	290.076	218.905	218.944	287.256	257.382	240.391	261.484	383.849	358.339	408.83	503.246	393.995		537.436	-2.03646	0.243761	0.247691	-8.22178	2.00507e-16	1.27485e-14		537.436	0.0591865	1.04188	0.254503	0.232557	0.816106	0.848156		537.436	0.10897	1.07846	0.255264	0.426889	0.66946	0.914359
C08C3.1	egl-5	225.489	269.115	286.083	364.17	388.694	348.126	271.651	324.532	296.179	158.941	211.114	262.871	48.9863	51.5071	56.6907	62.4875	48.3878	50.8144	181.813	125.685	155.28	138.061	160.226	169.303		194.009	0.494822	1.40915	0.171365	2.88754	0.00388272	0.0111822		194.009	-0.483607	0.715187	0.178562	-2.70835	0.00676195	0.0131862		194.009	0.0440365	1.03099	0.225887	0.19495	0.845432	0.967903
C08C3.4	cyk-7	1155.63	1016.57	748.751	1573.49	1596.39	1580.09	579.522	387.716	676.434	4528.16	1890.33	1522.87	53.7889	60.4218	67.4424	52.2284	68.9784	59.6092	230.841	467.64	291.015	305.017	379.127	285.307		815.724	0.701648	1.62636	0.303657	2.31066	0.0208515	0.0465948		815.724	2.27136	4.82779	0.304603	7.45679	8.86542e-14	7.72481e-12		815.724	-0.0077973	0.99461	0.337207	-0.0231232	0.981552	1
C08D8.2	tmd-2	744.29	832.781	998.592	961.1	965.094	1086.26	1097.09	1318.23	1010.83	437.088	673.194	819.668	542.692	574.502	549.314	548.398	490.055	421.173	714.995	526.519	574.429	671.038	622.851	671.986		743.84	0.225619	1.16928	0.182657	1.2352	0.216755	0.319043		743.84	-0.822852	0.565323	0.184519	-4.45945	8.2171e-06	4.40444e-05		743.84	-0.190991	0.876004	0.186309	-1.02513	0.305303	0.724308
C08E8.4	C08E8.4	22.0204	14.7685	11.5667	23.1901	20.3644	21.8124	13.3443	11.4879	18.1529	23.1789	40.9302	22.1832	21.1314	11.8862	14.6614	41.0366	30.8858	44.9512	22.4713	21.5137	19.5458	77.057	60.9311	107.643		29.8631	0.44689	1.3631	0.34895	1.28067	0.20031	0.298499		29.8631	1.02697	2.03775	0.366557	2.80168	0.00508378	0.0103016		29.8631	1.29332	2.45092	0.343867	3.76112	0.000169156	0.00897475
C08F8.2	C08F8.2	571.65	635.867	539.008	439.753	435.62	436.248	505.176	541.845	502.548	854.308	566.56	594.509	953.793	836.99	978.404	1248.82	870.981	976.223	437.168	483.492	502.761	378.864	419.748	356.372		627.779	-0.413008	0.751056	0.15772	-2.61861	0.00882879	0.022554		627.779	0.373186	1.29521	0.158476	2.35483	0.018531	0.0314947		627.779	0.161375	1.11835	0.154601	1.04381	0.296572	0.717341
C08F8.4	mboa-4	29.0669	31.9985	19.2778	9.44781	10.6249	15.7049	5.71897	6.70126	8.59874	6.62254	9.694	7.76411	5.7631	9.90521	10.7517	12.1244	8.23622	11.7264	6.12852	7.9261	6.51526	4.28095	9.02683	2.09016		10.654	-1.16379	0.446339	0.395869	-2.93983	0.00328388	0.0096786		10.654	0.221433	1.16589	0.533765	0.414852	0.67825	0.730935		10.654	0.28799	1.22094	0.474191	0.60733	0.543632	0.864547
C08F8.7	rap-3	464.19	355.265	201.261	120.245	120.415	131.747	65.7681	78.5005	62.102	81.1261	62.4724	77.6411	84.5254	75.2796	76.2393	94.1976	64.8603	86.9708	112.356	74.7318	80.3549	69.5654	65.4445	79.4261		116.029	-1.45308	0.365242	0.237426	-6.12013	9.34983e-10	1.41657e-08		116.029	0.0933637	1.06685	0.267196	0.349421	0.726774	0.772533		116.029	0.0616809	1.04368	0.25825	0.238842	0.811228	0.962137
C08F8.8	nhr-67	481.807	509.514	496.597	623.556	551.609	552.289	794.937	785.962	730.893	531.459	520.244	692.115	1030.63	1170.8	942.239	968.09	1084.09	1013.36	401.418	503.873	517.963	550.102	621.723	524.63		691.662	0.21533	1.16097	0.136062	1.58259	0.113515	0.189421		691.662	-0.40427	0.755619	0.136695	-2.95747	0.00310177	0.00675264		691.662	-0.0364472	0.975053	0.132745	-0.274567	0.783649	0.952307
C08G5.4	snt-6	160.309	124.712	147.283	171.778	200.987	197.184	61.9555	79.4578	62.102	34.7683	59.2411	63.222	282.392	277.346	316.686	342.282	319.154	348.86	652.688	517.461	549.454	459.131	400.566	460.88		262.079	0.399479	1.31903	0.159439	2.50552	0.0122272	0.0298125		262.079	-0.331229	0.794859	0.210002	-1.57726	0.114735	0.156357		262.079	0.205375	1.15299	0.150345	1.36602	0.171932	0.600021
C08G5.6	C08G5.6	9.68898	12.3071	6.94002	4.29446	7.96866	0.872495	16.2037	13.4025	12.4204	6.62254	12.9253	8.87327	25.9339	21.7915	25.4131	24.2489	15.4429	27.3616	40.8568	21.5137	24.9752	23.5452	20.3104	24.0368		16.9979	-1.13868	0.454175	0.516736	-2.2036	0.0275525	0.0587071		16.9979	-0.521146	0.696818	0.452464	-1.1518	0.249405	0.308197		16.9979	-0.121349	0.919328	0.35642	-0.340465	0.733506	0.93444
C08G9.2	C08G9.2	273.053	388.084	676.266	600.366	548.067	529.605	852.126	917.115	738.536	294.703	510.55	478.047	612.809	729.023	655.853	465.392	562.122	531.597	597.531	411.025	522.307	333.914	304.656	387.725		538.353	0.32611	1.25363	0.240922	1.35359	0.175867	0.269026		538.353	-0.96202	0.513338	0.241946	-3.97618	7.00302e-05	0.000275532		538.353	-0.357758	0.780377	0.240843	-1.48544	0.137428	0.555735
C08H9.1	ctsa-3.2	10.5698	14.7685	14.6512	12.8834	6.19785	11.3424	9.53161	10.5306	12.4204	1.65564	23.6964	8.87327	61.473	66.3649	43.9842	65.2854	52.5059	61.5636	26.5569	21.5137	20.6317	13.9131	5.64177	19.8565		24.8505	-0.396716	0.759586	0.42756	-0.92786	0.35348	0.470569		24.8505	0.183359	1.13552	0.460693	0.398006	0.690626	0.741587		24.8505	0.0631221	1.04472	0.322122	0.195958	0.844643	0.967784
C08H9.15	C08H9.15	349.684	250.244	225.936	366.747	347.08	354.233	322.169	338.892	312.421	155.63	218.653	253.997	281.431	295.175	304.957	290.054	281.061	335.18	326.855	254.767	282.328	201.204	172.638	196.475		279.909	0.373178	1.2952	0.168679	2.21236	0.0269421	0.0576639		279.909	-0.618775	0.651223	0.175717	-3.52143	0.000429219	0.00127516		279.909	0.0401142	1.0282	0.170961	0.234639	0.814489	0.962617
C08H9.16	C08H9.16	1080.76	944.365	579.106	338.404	354.163	360.34	499.457	437.497	492.994	1581.13	828.298	868.471	408.219	375.407	387.061	452.335	401.516	338.111	191.006	331.764	253.009	384.215	499.861	360.552		531.169	-1.30608	0.404418	0.241834	-5.40073	6.63685e-08	6.46224e-07		531.169	1.19414	2.28808	0.241464	4.94542	7.59796e-07	5.54519e-06		531.169	0.0261044	1.01826	0.244022	0.106976	0.914808	0.984963
C08H9.2	vgln-1	11275.3	14676.6	18843.7	23743.2	24228.3	23146.4	29614.7	30977.1	29339.8	28690.5	23188	27625.8	7169.29	7235.75	6122.6	5320.76	6205.99	5011.08	9525.77	12099.8	11623.2	9692.06	10162	8661.62		16007.5	0.666804	1.58755	0.156801	4.25255	2.11346e-05	0.0001123		16007.5	-0.177845	0.884022	0.156775	-1.1344	0.256627	0.315866		16007.5	-0.311837	0.805615	0.157305	-1.98237	0.0474378	0.356347
C08H9.3	algn-8	364.658	438.133	484.259	386.501	425.881	378.663	837.829	843.401	789.173	1582.79	890.771	892.873	850.057	895.431	946.149	626.74	807.15	714.333	276.805	391.776	380.057	400.268	409.592	364.733		640.751	-0.112548	0.924953	0.192508	-0.58464	0.55879	0.664987		640.751	0.442646	1.35909	0.18921	2.33945	0.0193123	0.0326287		640.751	-0.325637	0.797946	0.189492	-1.71847	0.0857108	0.462509
C09B7.1	ser-7	10.5698	21.3323	43.9535	31.779	28.333	24.4299	43.8454	57.4394	51.5924	28.1458	47.3929	22.1832	22.0919	33.6777	30.3002	23.3162	25.7382	29.316	22.4713	11.323	14.1164	6.42142	6.77012	13.586		27.0885	0.143732	1.10476	0.378153	0.380091	0.703878	0.789766		27.0885	-0.634146	0.644322	0.372581	-1.70203	0.0887492	0.124482		27.0885	-0.134911	0.910726	0.38572	-0.349765	0.726515	0.932313
C09B8.1	ipp-5	473.879	472.593	636.94	780.733	792.439	690.144	548.068	603.113	495.86	162.252	359.755	273.962	516.758	539.834	567.885	555.859	497.262	554.073	1172.59	768.831	798.12	851.908	631.878	965.654		612.933	0.514956	1.42895	0.215709	2.38727	0.0169741	0.0391415		612.933	-1.03843	0.486858	0.221717	-4.68356	2.81935e-06	1.75473e-05		612.933	-0.0152687	0.989472	0.217175	-0.0703061	0.94395	0.995326
C09B8.3	C09B8.3	114.506	81.2269	94.8469	102.208	101.822	93.357	168.71	172.318	155.733	69.5367	117.405	109.807	101.815	91.1279	98.7201	137.099	100.894	97.72	151.17	89.4516	94.4713	119.866	102.68	113.914		111.684	0.0352281	1.02472	0.213007	0.165385	0.868641	0.91359		111.684	-0.722573	0.606016	0.214691	-3.36564	0.000763669	0.00206996		111.684	0.204688	1.15244	0.215382	0.950349	0.341935	0.751759
C09B8.4	C09B8.4	406.056	259.27	151.138	680.243	596.764	777.393	18.1101	9.57323	12.4204	8.27818	6.46266	7.76411	723.269	524.976	513.149	135.234	143.104	153.42	511.732	432.538	612.435	101.672	107.194	97.1924		291.225	1.33324	2.51968	0.251871	5.29335	1.20093e-07	1.10022e-06		291.225	-0.850686	0.554521	0.475557	-1.78882	0.0736438	0.105723		291.225	-2.02868	0.24508	0.257542	-7.87706	3.3517e-15	1.58933e-12
C09B8.6	hsp-25	2555.25	2044.62	2472.96	4196.55	4340.27	4256.03	4342.6	4834.48	4688.22	2173.85	3446.75	3297.53	2023.81	1969.15	1899.14	1944.57	1601.95	1678.83	3664.86	2910.01	3035.03	2909.97	2701.28	2720.34		2987.84	0.855008	1.80877	0.148865	5.74352	9.27258e-09	1.08457e-07		2987.84	-0.635148	0.643875	0.149057	-4.26112	2.03406e-05	9.52383e-05		2987.84	-0.173103	0.886933	0.150038	-1.15373	0.248611	0.676801
C09B8.7	pak-1	2361.47	2701	3041.27	3676.06	3926.78	3966.36	4972.64	5307.4	4654.78	3344.38	3591.09	4081.7	3120.72	3421.26	2911.75	2823.13	2995.93	2996.1	2225.68	2359.71	2627.82	2539.67	2935.98	2493.56		3294.84	0.513377	1.42739	0.118553	4.33038	1.48853e-05	8.15401e-05		3294.84	-0.438312	0.737998	0.118578	-3.6964	0.00021868	0.000716073		3294.84	-0.100923	0.932436	0.11888	-0.848953	0.395907	0.789148
C09B8.8	C09B8.8	18.4971	22.1528	19.2778	24.9079	16.8227	15.7049	30.5012	22.0184	36.3058	8.27818	24.7735	24.4015	48.9863	48.5355	48.8713	57.8242	45.2992	53.746	41.8783	29.4398	54.2939	31.0369	29.3372	27.1721		32.5026	-0.0602668	0.959087	0.322971	-0.186601	0.851973	0.9009		32.5026	-0.557565	0.679448	0.33102	-1.68438	0.0921078	0.128814		32.5026	0.10181	1.07312	0.266525	0.381992	0.702468	0.925764
C09B9.1	C09B9.1	0	0	1.54223	1.71778	0.885407	0	1.90632	0	1.91083	4.96691	2.15422	3.32748	6.72361	2.97156	0	11.1918	5.14764	5.8632	2.04284	0	2.17175	2.14047	0	1.04508		2.40455	0.685571	1.60834	1.48942	0.460294	0.645305	0.743675		2.40455	1.40557	2.64922	1.11747	1.25781	0.208461	NA		2.40455	1.19623	2.29139	0.877935	1.36254	0.173026	0.601075
C09B9.8	hot-9	158.547	145.224	156.536	123.68	110.676	128.257	173.475	202.952	194.905	87.7487	150.795	144.191	59.552	56.4597	66.465	60.6222	52.5059	66.4496	328.897	163.051	263.868	170.168	154.584	191.25		142.119	-0.343909	0.787904	0.215943	-1.59259	0.111252	0.186313		142.119	-0.561057	0.677805	0.219517	-2.55587	0.0105924	0.0194157		142.119	-0.0219428	0.984905	0.245708	-0.0893045	0.92884	0.990458
C09D1.1	unc-89	781.284	1709.87	6640.06	4872.5	4098.55	3908.78	6763.63	6594.04	6750.01	1976.83	4335.37	3615.86	3124.56	3813.5	3448.36	1835.45	1570.03	1353.42	2935.56	1835.46	2289.03	2371.64	1482.66	2468.48		3357.29	0.496142	1.41044	0.487545	1.01763	0.308853	0.422345		3357.29	-1.01797	0.493811	0.487584	-2.08778	0.0368175	0.0571748		3357.29	-1.12598	0.45819	0.487848	-2.30806	0.0209959	0.255135
C09D4.1	C09D4.1	223.727	254.347	316.928	213.005	247.914	215.506	869.283	919.03	867.517	642.387	654.883	552.361	639.704	636.905	704.724	384.251	405.634	492.509	927.45	672.586	761.2	497.66	429.903	494.323		542.656	-0.235229	0.84955	0.157893	-1.4898	0.136277	0.219715		542.656	-0.522883	0.69598	0.149249	-3.50342	0.000459318	0.00134336		542.656	-0.627755	0.647183	0.150691	-4.16585	3.10199e-05	0.00233779
C09D4.3	C09D4.3	2.64245	4.92284	5.39779	3.43557	0.885407	6.10747	2.85948	0	1.91083	6.62254	5.38555	2.21832	14.4077	28.7251	19.5485	29.8448	33.9744	32.2476	3.06426	9.05839	7.60114	13.9131	15.797	11.4959		10.9194	-0.324808	0.798405	0.633518	-0.512705	0.608157	0.709215		10.9194	1.51761	2.86317	0.838049	1.81089	0.0701586	0.101188		10.9194	0.617078	1.53377	0.388289	1.58922	0.11201	0.515526
C09D4.4	C09D4.4	1055.22	1430.09	1671	1401.71	1442.33	1428.27	1804.33	1611.17	1759.87	6205.32	2968.52	3019.13	14953.3	16387.2	14634	15993.1	15283.3	16702.3	1266.56	2099.28	1524.57	1701.68	1831.32	1521.64		5403.97	0.0394843	1.02775	0.227598	0.173483	0.862272	0.909721		5403.97	1.23536	2.35441	0.227082	5.44016	5.32315e-08	5.5443e-07		5403.97	0.0615631	1.0436	0.225943	0.272472	0.785259	0.952307
C09E10.2	dgk-1	488.853	728.58	1173.63	971.407	993.427	954.51	1618.47	1688.72	1623.25	774.837	1335.62	1132.45	1343.76	1398.61	1398.7	1084.67	1144.84	1245.93	1812	1306.67	1461.59	1347.43	1104.66	1359.65		1228.84	0.287207	1.22028	0.223854	1.28301	0.199487	0.297571		1228.84	-0.602453	0.658633	0.223595	-2.6944	0.00705154	0.013667		1228.84	-0.252831	0.839248	0.223269	-1.1324	0.257464	0.689266
C09E8.1	C09E8.1	693.203	740.067	939.216	1138.03	1106.76	1115.92	1949.22	2208.54	1928.03	1599.34	1742.77	1845.64	908.649	947.928	824.948	710.679	1054.24	992.835	1495.36	1486.71	1666.82	1272.51	1386.75	1281.27		1293.14	0.501694	1.41587	0.142837	3.51235	0.000444159	0.00167641		1293.14	-0.229548	0.852902	0.141346	-1.62401	0.104374	0.143497		1293.14	0.03983	1.02799	0.143656	0.277259	0.781581	0.952307
C09E8.2	lips-7	426.315	440.594	510.477	435.458	404.631	404.838	159.178	172.318	172.93	56.2916	116.328	92.0602	168.09	153.531	124.133	180.001	127.661	183.714	314.598	234.386	233.464	323.211	245.981	303.073		249.303	-0.146254	0.903594	0.183059	-0.798947	0.424321	0.540409		249.303	-0.901691	0.535259	0.210867	-4.27612	1.90181e-05	9.03488e-05		249.303	0.142031	1.10346	0.198768	0.714554	0.474885	0.835176
C09E8.3	mlt-10	2217.02	2440.91	3514.73	1807.97	1975.34	1731.9	3070.13	3728.77	3828.35	572.85	1049.11	1174.6	7811.88	7862.75	9272.84	1121.04	1069.68	1109.12	5339.99	4301.61	4100.27	1442.68	1281.81	1445.35		3052.95	-0.567552	0.674761	0.202808	-2.79847	0.00513449	0.0142414		3052.95	-1.92247	0.263803	0.204274	-9.4112	4.90482e-21	4.38061e-18		3052.95	-2.91839	0.132275	0.203203	-14.362	8.96414e-47	3.40055e-43
C09E9.1	C09E9.1	1163.56	895.957	555.202	329.815	342.653	329.803	272.604	255.605	262.739	642.387	380.22	362.695	564.784	516.061	600.14	1080.94	773.176	819.871	536.246	658.998	551.626	564.015	680.397	550.757		570.427	-1.38281	0.383471	0.224611	-6.15646	7.43871e-10	1.14332e-08		570.427	0.80245	1.74406	0.22896	3.50477	0.000457004	0.00133906		570.427	0.669906	1.59097	0.223503	2.9973	0.0027238	0.0758862
C09F12.1	clc-1	136.527	100.098	67.0869	67.8525	46.9266	51.4772	32.4075	44.9942	34.3949	36.424	52.7784	44.3663	41.3022	46.5545	28.3454	42.9019	38.0925	48.86	103.163	62.2765	72.7538	282.542	223.414	294.712		83.3438	-0.864512	0.549232	0.261253	-3.3091	0.000935956	0.00324635		83.3438	0.272963	1.20829	0.298086	0.91572	0.359814	0.424431		83.3438	0.161626	1.11855	0.29129	0.554863	0.578989	0.880671
C09F12.2	C09F12.2	16.7355	13.948	10.0245	4.29446	5.31244	2.61749	6.67213	2.87197	5.73249	0	4.30844	2.21832	0	1.98104	2.93228	9.32649	6.17717	3.9088	7.14995	6.7938	15.2023	8.56189	7.89848	4.18032		6.20201	-1.73103	0.301236	0.584571	-2.9612	0.00306439	0.0091257		6.20201	-1.07351	0.47516	0.797715	-1.34574	0.178388	NA		6.20201	1.99692	3.99148	0.819254	2.43749	0.0147896	0.21496
C09F12.3	C09F12.3	14.9739	15.589	15.4223	18.8956	14.1665	13.0874	6.67213	5.74394	5.73249	3.31127	2.15422	2.21832	6.72361	13.8673	4.88713	11.1918	8.23622	11.7264	50.0496	36.2336	32.5763	64.2142	47.3909	50.1638		18.9678	0.00592893	1.00412	0.364404	0.0162702	0.987019	0.993295		18.9678	-1.29171	0.408467	0.716034	-1.80397	0.0712353	0.102596		18.9678	0.299282	1.23053	0.448781	0.666879	0.504849	0.849031
C09F5.1	C09F5.1	2032.92	2016.72	2361.15	3420.97	3352.15	3458.57	3896.52	4208.39	3495.86	1817.89	3084.85	2986.96	2984.32	3297.44	3288.06	2916.39	3133.88	2926.71	3468.74	2520.5	2962.27	2592.11	2457.55	2580.3		2969.22	0.674372	1.5959	0.159743	4.22161	2.4256e-05	0.00012716		2969.22	-0.554471	0.680907	0.159941	-3.46672	0.000526854	0.00150826		2969.22	-0.0922801	0.938039	0.159725	-0.577742	0.563438	0.874015
C09F5.2	orai-1	522.324	507.873	416.401	360.735	404.631	324.568	209.696	216.355	202.548	438.743	256.352	246.233	445.68	437.81	387.061	503.631	438.579	468.079	451.468	620.5	490.816	557.593	638.648	616.597		423.455	-0.407999	0.753668	0.179698	-2.27047	0.023179	0.0506597		423.455	0.569176	1.48368	0.188259	3.02337	0.00249976	0.00562013		423.455	0.150808	1.11019	0.180234	0.836737	0.402741	0.792425
C09F9.2	C09F9.2	2918.15	4826.02	7866.9	9387.69	9154.22	8883.75	16459.2	18602.7	16537.3	9582.82	12076.6	13965.4	11064.2	11939.7	9873.96	7906.07	9721.83	8024.77	9996.65	10597.2	12961	11040.6	12010.2	9992.01		10641.2	0.81283	1.75665	0.228294	3.56046	0.000370212	0.00142326		10641.2	-0.534352	0.690469	0.228156	-2.34204	0.0191786	0.0324487		10641.2	-0.358023	0.780233	0.228218	-1.56878	0.116699	0.523886
C09F9.3	glna-1	24.6629	36.9213	69.4002	65.2758	71.718	61.0747	355.529	394.417	340.128	614.241	398.531	300.582	466.811	469.507	447.661	379.588	483.878	431.923	915.193	1319.13	887.162	1190.1	1245.7	1199.75		507.037	0.585949	1.50103	0.275999	2.12302	0.0337525	0.0693031		507.037	0.263008	1.19998	0.240574	1.09326	0.274282	0.334307		507.037	-0.0957523	0.935784	0.238878	-0.400843	0.688536	0.921002
C09G1.4	C09G1.4	269.53	282.243	443.39	570.304	552.494	567.122	584.288	624.174	531.211	339.405	532.093	468.065	549.415	592.331	589.388	509.226	583.742	588.275	988.735	782.419	761.2	722.41	590.129	691.843		571.393	0.762287	1.69618	0.181139	4.20829	2.5731e-05	0.000134231		571.393	-0.371146	0.773168	0.182019	-2.03905	0.0414447	0.0634639		571.393	-0.0423778	0.971053	0.180008	-0.235422	0.813881	0.962617
C09G1.5	C09G1.5	175.282	175.581	159.62	218.159	229.32	247.789	327.888	291.983	328.663	163.908	267.123	205.194	386.128	408.094	337.212	323.629	314.006	367.427	98.0564	86.0548	71.6679	81.338	73.343	87.7867		226.052	0.446342	1.36258	0.161535	2.76314	0.00572486	0.0156456		226.052	-0.562255	0.677243	0.162229	-3.46581	0.000528637	0.00151205		226.052	-0.170675	0.888427	0.154747	-1.10293	0.270059	0.697475
C09G12.1	ceh-53	135.646	114.866	93.3047	108.22	111.561	106.444	216.368	221.142	256.051	81.1261	107.711	144.191	121.986	112.919	80.149	142.695	110.159	89.9024	69.4566	62.2765	91.2137	97.3915	91.3967	97.1924		119.307	-0.0732829	0.950473	0.217135	-0.337499	0.73574	0.814097		119.307	-1.04266	0.485431	0.217424	-4.79553	1.62245e-06	1.08037e-05		119.307	0.122936	1.08895	0.221305	0.555504	0.57855	0.880357
C09G4.1	hyl-1	1781.89	1777.97	1354.07	1491.04	1658.37	1595.79	1608.94	1625.53	1534.4	2630.8	1696.45	1692.58	239.169	230.791	214.056	202.385	206.935	223.779	1313.55	1023.6	1152.12	861.54	903.811	851.74		1161.3	-0.0502059	0.965798	0.157566	-0.318635	0.750003	0.825336		1161.3	0.333754	1.26029	0.157971	2.11275	0.0346223	0.0541068		1161.3	-0.111752	0.925463	0.174027	-0.642153	0.520774	0.85613
C09G4.2	pkg-2	953.043	823.755	1388	3413.24	3403.5	3711.59	3430.43	3016.52	3626.76	1289.74	2217.77	1836.77	1759.67	1730.44	1658.69	1295.45	1709.02	1658.31	3261.4	3008.52	2746.18	2655.26	2384.21	2569.85		2314.5	1.7337	3.32579	0.185053	9.36867	7.3452e-21	1.21424e-18		2314.5	-0.912818	0.531147	0.185001	-4.93414	8.05065e-07	5.83979e-06		2314.5	-0.143208	0.905503	0.185371	-0.77255	0.439788	0.815813
C09G4.3	cks-1	8823.14	6349.64	4699.16	3250.91	3351.27	3113.94	8171.45	7417.34	8576.76	33665.7	15137.7	15724.5	203.629	225.839	235.56	235.028	252.234	233.551	2161.33	4145.35	3349.93	3493.25	4133.16	3198.99		5839.56	-1.03223	0.488953	0.259675	-3.9751	7.03509e-05	0.000325866		5839.56	1.41682	2.66997	0.259387	5.46221	4.70252e-08	4.963e-07		5839.56	0.11614	1.08383	0.270263	0.42973	0.667392	0.913825
C09G4.4	C09G4.4	9073.29	6596.61	4907.37	3424.4	3536.32	3279.71	1033.23	854.889	971.657	3377.5	1551.04	1621.59	441.838	508.137	476.007	431.817	519.912	448.535	712.952	2211.38	1727.63	1779.8	2299.58	1639.73		2226.04	-1.00674	0.49767	0.300871	-3.34608	0.000819623	0.00288555		2226.04	1.19458	2.28879	0.302267	3.95209	7.74729e-05	0.000300024		2226.04	-0.0263681	0.981889	0.305195	-0.0863974	0.931151	0.991097
C09G5.1	lgc-57	16.7355	15.589	41.6401	25.7668	31.8747	28.7923	35.267	30.6343	30.5733	44.7022	42.0073	27.729	10.5657	6.93364	6.84198	16.7877	10.2953	14.658	25.5355	23.7783	21.7175	24.6154	12.4119	14.6311		23.3368	0.212292	1.15853	0.344643	0.615977	0.53791	0.647179		23.3368	0.233953	1.17605	0.344274	0.679555	0.496787	0.5596		23.3368	0.781952	1.71946	0.454657	1.71987	0.0854557	0.462119
C09G5.13	C09G5.13	26.4245	19.6914	28.5312	19.7545	18.5935	27.9198	11.4379	15.3172	14.3312	6.62254	15.0795	7.76411	24.9734	11.8862	19.5485	22.3836	21.6201	14.658	58.221	36.2336	38.0057	28.8964	39.4924	35.5327		23.455	-0.172608	0.887237	0.32874	-0.52506	0.599542	0.701623		23.455	-0.429514	0.742512	0.437016	-0.982834	0.325689	0.388619		23.455	0.0540161	1.03815	0.35835	0.150736	0.880184	0.978599
C09G5.3	col-79	2.64245	0.820473	2.31334	4.29446	1.77081	3.48998	16.2037	19.1465	10.5096	11.5894	15.0795	7.76411	20.1708	22.782	31.2776	12.1244	21.6201	23.4528	15.3213	12.4553	10.8588	14.9833	12.4119	11.4959		12.6908	0.736429	1.66605	0.751876	0.979455	0.327355	0.442693		12.6908	-0.411522	0.75183	0.444196	-0.926442	0.354216	0.418534		12.6908	-0.381135	0.767834	0.376546	-1.01219	0.31145	0.727497
C09G5.6	bli-1	48.4449	37.7418	40.0979	34.3557	46.0412	40.1348	69.5808	76.5858	72.6116	44.7022	57.0869	59.8946	39.3812	50.5165	39.0971	31.7101	30.8858	25.4072	26.5569	30.5721	39.0916	31.0369	19.182	14.6311		41.8894	-0.0652706	0.955766	0.245924	-0.265409	0.790694	0.855311		41.8894	-0.419562	0.747652	0.23847	-1.75939	0.0785112	0.111976		41.8894	-0.550478	0.682794	0.26593	-2.07001	0.0384513	0.32632
C09G9.2	npp-23	2604.57	1925.65	1265.4	813.371	798.637	791.353	508.988	436.539	591.402	1852.66	887.539	880.672	2132.35	2081.08	2523.72	2730.8	2617.06	2247.56	623.067	986.233	785.089	841.206	916.223	777.539		1359.11	-1.2697	0.414746	0.252237	-5.03375	4.80987e-07	3.88497e-06		1359.11	1.23368	2.35167	0.254171	4.85376	1.21142e-06	8.33069e-06		1359.11	0.172999	1.1274	0.251281	0.688466	0.49116	0.844382
C09G9.4	hdl-2	5.2849	4.92284	3.08445	3.43557	1.77081	4.36248	8.57845	8.61591	4.77708	8.27818	10.7711	11.0916	2.88155	4.9526	1.95485	12.1244	2.05906	3.9088	3.06426	4.5292	2.17175	2.14047	4.51341	6.27048		5.23101	-0.462252	0.725852	0.703202	-0.657353	0.510954	0.622194		5.23101	0.473163	1.38815	0.592956	0.797973	0.424886	NA		5.23101	0.910888	1.8802	0.703102	1.29553	0.195139	0.623901
C09G9.5	C09G9.5	79.2735	64.8174	37.7846	62.6991	54.8952	54.0947	61.0023	74.6712	83.1211	34.7683	51.7013	55.4579	671.401	584.407	859.158	704.15	914.221	915.637	36.7711	26.0429	39.0916	26.7559	29.3372	32.3975		231.402	-0.0759802	0.948697	0.247862	-0.306543	0.759191	0.832492		231.402	-0.600119	0.659699	0.26192	-2.29123	0.02195	0.0364559		231.402	0.26054	1.19793	0.207755	1.25407	0.209817	0.643391
C09H10.10	nbs-1	264.245	246.142	227.478	153.742	166.457	138.727	325.028	285.282	367.835	746.692	459.926	432.572	224.761	192.161	242.402	252.748	239.88	233.551	152.192	229.857	180.256	195.853	260.65	197.52		267.331	-0.684642	0.62216	0.202083	-3.38793	0.000704227	0.00254061		267.331	0.738257	1.66816	0.195491	3.77642	0.000159097	0.000548889		267.331	0.139355	1.10141	0.201109	0.692933	0.488352	0.842807
C09H10.2	rpl-36.A	16849.1	13014.4	7665.64	3656.3	3469.02	3498.71	3246.47	3588.05	3599.05	1819.54	2244.7	2567.7	4213.79	3820.44	3057.39	5227.5	3597.17	4279.16	5521.8	4335.57	5254.56	4673.72	5664.34	4878.43		4989.27	-1.82063	0.283098	0.212694	-8.55985	1.13013e-17	9.03984e-16		4989.27	-0.653089	0.635917	0.213575	-3.0579	0.00222896	0.00510118		4989.27	0.240572	1.18146	0.212981	1.12955	0.258667	0.689826
C09H10.3	nuo-1	5329.82	5164.06	3844	3719.86	3988.76	3807.57	2838.51	2834.63	2874.84	5506.64	3413.36	3375.17	2882.51	2984.44	2994.83	2640.33	2994.9	3074.27	3320.64	3107.03	3229.4	3141.14	3144.72	3086.12		3470.73	-0.31608	0.803249	0.156788	-2.01598	0.0438022	0.0864538		3470.73	0.523165	1.4371	0.157336	3.32516	0.000883688	0.00234545		3470.73	-0.0250551	0.982783	0.15738	-0.159201	0.87351	0.976793
C09H10.8	glb-4	30.8286	44.3056	39.3268	45.5213	66.4055	56.7122	81.0187	67.9699	60.1912	102.649	95.8629	56.5671	120.065	135.701	116.314	119.379	112.219	152.443	59.2424	30.5721	36.9198	28.8964	24.8238	39.713		71.8186	0.555237	1.46941	0.266816	2.08097	0.0374362	0.0755734		71.8186	0.273801	1.20899	0.255712	1.07074	0.284286	0.345107		71.8186	0.0461299	1.03249	0.23717	0.194501	0.845783	0.968013
C09H6.2	lin-10	1587.23	2197.23	2868.54	2865.26	3163.56	3098.23	2008.31	2231.52	1930.89	1374.18	1296.84	1777.98	3847.83	4379.09	3399.49	3680.23	4302.4	3675.25	1190.98	1041.72	1152.12	1223.28	1155.43	1065.98		2354.73	0.455815	1.37156	0.172423	2.64359	0.00820327	0.0212037		2354.73	-0.471429	0.72125	0.173762	-2.71308	0.00666617	0.0130171		2354.73	0.00386442	1.00268	0.172112	0.0224529	0.982087	1
C09H6.3	mau-2	1357.34	1307.83	1151.27	1505.64	1496.34	1451.83	820.672	764.901	782.485	2218.55	1148.2	1167.94	844.294	876.611	715.476	722.803	822.593	736.809	1193.02	1802.62	1629.9	1853.65	2134.85	1768.27		1261.41	0.222927	1.1671	0.198445	1.12337	0.26128	0.36994		1261.41	0.934374	1.91106	0.199878	4.67472	2.9435e-06	1.81461e-05		1261.41	-0.0944446	0.936633	0.200626	-0.470749	0.63782	0.902415
C10A4.2	C10A4.2	0.880817	0	0	0	2.65622	2.61749	0	1.91465	0.955415	4.96691	1.07711	1.10916	10.5657	5.94312	3.90971	2.79795	4.11811	9.772	96.0136	50.9535	56.4656	93.1106	86.8832	68.9753		21.0703	2.56611	5.92212	1.35415	1.89499	0.0580932	0.109851		21.0703	1.12575	2.18215	1.09771	1.02555	0.305106	0.367371		21.0703	-0.298121	0.813311	0.566741	-0.526027	0.598869	0.885869
C10A4.3	C10A4.3	344.399	269.115	203.574	254.232	222.237	258.259	277.37	303.471	278.981	89.4043	211.114	204.085	690.611	693.364	585.478	791.819	791.707	904.887	651.666	552.562	692.79	471.974	582.231	456.7		449.251	-0.151661	0.900213	0.214956	-0.705546	0.48047	0.594119		449.251	-0.749702	0.594727	0.221621	-3.38281	0.000717475	0.00195812		449.251	0.337434	1.26351	0.208531	1.61814	0.105632	0.502808
C10A4.6	C10A4.6	1.76163	0	0	0.858892	0	0	0	0	0	0	0	0	1.92103	0	0	1.8653	0	0.9772	0	0	0	2.14047	0	2.09016		0.483945	-0.878058	0.544099	2.56349	-0.342525	0.731956	NA		0.483945	0	1	2.63897	0	1	NA		0.483945	0.56938	1.48389	2.43977	0.233374	0.815471	0.962654
C10B5.3	C10B5.3	246.629	204.298	177.356	392.514	427.652	354.233	256.4	264.221	232.166	130.795	208.959	220.723	331.378	332.815	344.054	338.552	367.541	378.176	413.675	404.231	437.608	474.115	427.646	435.798		325.064	0.904736	1.8722	0.152318	5.93976	2.85431e-09	3.77815e-08		325.064	-0.405826	0.754804	0.161835	-2.50765	0.0121537	0.021901		325.064	0.104581	1.07518	0.151056	0.692332	0.488729	0.842807
C10C5.1	pezo-1	1686.76	2947.14	5045.39	4355.44	3825.84	3996.9	4672.4	4449.64	4528.67	11538.1	6126.61	6488.58	2733.63	2805.15	2879.5	2191.73	2744.72	2486.97	2773.16	3309.71	3057.83	3522.15	3360.24	3132.1		3944.1	0.331153	1.25802	0.2578	1.28453	0.198956	0.297016		3944.1	0.822939	1.76901	0.257664	3.19385	0.00140391	0.00346372		3944.1	-0.181484	0.881796	0.258168	-0.702967	0.482076	0.838488
C10C5.6	daf-15	2680.32	3775.82	4805.58	5168.81	5135.36	5505.44	3468.55	3259.68	3360.2	7430.49	3989.62	4615.21	112.38	156.502	129.998	94.1976	112.219	99.6744	2739.45	3305.18	3121.9	3831.45	3530.62	3495.79		3080.19	0.489241	1.40371	0.203009	2.40995	0.0159545	0.0371474		3080.19	0.667881	1.58874	0.203245	3.28608	0.00101592	0.00264533		3080.19	-0.382554	0.767079	0.229576	-1.66635	0.0956439	0.483037
C10C5.7	C10C5.7	5.2849	7.38426	3.85557	1.71778	4.42704	6.10747	28.5948	39.2502	37.2612	26.4902	44.1615	26.6198	3.84207	4.9526	3.90971	2.79795	6.17717	11.7264	1.02142	6.7938	5.42939	4.28095	10.1552	3.13524		12.3074	-0.430216	0.74215	0.604912	-0.711205	0.476957	0.590659		12.3074	-0.0986315	0.933918	0.398921	-0.247246	0.804718	0.839537		12.3074	0.698895	1.62326	0.610215	1.14533	0.252074	0.68197
C10C6.1	kin-4	2239.92	3180.16	4622.05	4518.63	4458.02	4536.1	5441.6	5012.54	5126.76	16124.2	7761.66	7984.83	4300.23	4271.12	5009.31	3295.05	4284.9	3580.46	3322.68	4962.87	3770.17	4162.15	4285.49	3904.42		5006.47	0.428127	1.34549	0.24268	1.76416	0.0777051	0.139021		5006.47	1.03214	2.04506	0.242487	4.25648	2.07669e-05	9.69168e-05		5006.47	-0.283204	0.821764	0.242736	-1.16671	0.243326	0.673941
C10C6.2	npr-3	46.6833	35.2804	35.4712	37.7913	28.333	31.4098	21.9227	25.8477	21.9745	13.2451	16.1567	12.2007	35.5391	40.6113	51.8036	41.0366	39.1221	54.7232	27.5784	23.7783	26.061	32.1071	12.4119	30.3073		30.8915	-0.263182	0.833248	0.278859	-0.943781	0.345281	0.461388		30.8915	-0.737438	0.599804	0.367332	-2.00755	0.0446911	0.0677957		30.8915	0.0770594	1.05487	0.274811	0.280409	0.779164	0.952307
C10C6.6	catp-8	2881.15	3508.34	3359.74	3642.56	3441.58	3541.46	4514.17	4328.06	4342.36	10945.4	6186.92	6583.97	6851.36	7101.04	7063.86	5795.48	6332.63	6024.44	2781.33	3240.64	3098.01	3072.65	3188.73	3005.65		4784.65	0.124118	1.08984	0.158002	0.785548	0.432132	0.548385		4784.65	0.846288	1.79787	0.157738	5.36516	8.08771e-08	7.99262e-07		4784.65	-0.211351	0.863728	0.157566	-1.34135	0.179806	0.610126
C10C6.7	C10C6.7	103.056	88.6111	39.3268	44.6624	28.333	35.7723	51.4707	56.482	59.2357	38.0796	39.8531	54.3488	52.8284	53.4881	55.7133	61.5548	53.5355	67.4268	52.0925	61.1442	65.1526	56.7225	64.3162	54.3441		55.7313	-1.07947	0.473201	0.275522	-3.91792	8.9315e-05	0.000401701		55.7313	-0.327045	0.797167	0.288663	-1.13297	0.257228	0.316538		55.7313	0.172806	1.12725	0.274745	0.628969	0.52937	0.857457
C10E2.3	hda-4	1049.93	1407.93	2426.69	3049.07	3067.05	2924.6	2657.41	2644.13	2557.65	2124.18	2281.32	2098.53	2272.58	2618.94	2612.66	2091	2270.11	2185.02	976.478	739.391	841.555	872.243	719.89	889.363		1974.07	0.887735	1.85027	0.198156	4.47997	7.4654e-06	4.42511e-05		1974.07	-0.272948	0.827627	0.198435	-1.3755	0.168976	0.219197		1974.07	-0.197069	0.872321	0.198233	-0.994125	0.320162	0.734968
C10E2.5	C10E2.5	42.2792	18.8709	17.7356	12.0245	15.0519	15.7049	12.3911	14.3598	10.5096	14.9007	11.8482	16.6374	29.776	22.782	21.5034	19.5856	7.2067	19.544	35.7497	28.3075	38.0057	33.1773	18.0537	35.5327		21.3141	-0.873031	0.545998	0.384476	-2.2707	0.023165	0.0506597		21.3141	0.21475	1.1605	0.443893	0.483787	0.628537	0.684275		21.3141	-0.667578	0.629563	0.393157	-1.698	0.0895087	0.468849
C10F3.1	cpg-4	657.089	625.201	453.415	302.33	329.371	328.058	583.335	432.71	678.345	3663.92	1457.33	1502.91	151.762	146.597	140.749	116.581	180.167	169.056	112.356	170.977	127.048	131.639	224.542	152.582		534.92	-0.854534	0.553044	0.285219	-2.99606	0.00273492	0.0082302		534.92	1.96555	3.90561	0.282924	6.94726	3.7244e-12	1.75391e-10		534.92	0.0841542	1.06007	0.295765	0.284531	0.776004	0.951013
C10F3.3	acy-2	51.9682	54.1512	79.4247	46.3802	61.9785	48.8597	132.489	131.153	110.828	48.0134	102.326	93.1693	342.904	381.35	371.422	360.935	341.803	382.085	127.678	86.0548	91.2137	92.0403	85.7549	143.176		156.965	-0.244005	0.844398	0.250025	-0.975925	0.329101	0.444559		156.965	-0.592983	0.66297	0.240097	-2.46977	0.0135201	0.024072		156.965	-0.0141844	0.990216	0.213269	-0.0665096	0.946972	0.996018
C10F3.4	mcp-1	647.4	622.739	552.117	467.237	493.172	503.43	427.969	420.265	412.739	395.697	304.822	360.477	414.943	404.132	434.955	421.557	399.457	400.652	522.967	588.796	537.509	476.255	543.867	480.737		468.079	-0.31528	0.803695	0.111603	-2.825	0.00472801	0.0132773		468.079	-0.257387	0.836602	0.119762	-2.14915	0.0316221	0.05002		468.079	-0.0374485	0.974377	0.116456	-0.321568	0.74778	0.93941
C10F3.5	pcm-1	1116.88	776.988	487.344	293.741	307.236	329.803	204.93	197.209	236.943	508.28	309.131	305.019	187.301	171.36	173.982	239.691	173.99	180.782	267.612	280.81	237.807	269.7	311.426	293.667		327.568	-1.35449	0.391073	0.229221	-5.90911	3.43962e-09	4.4655e-08		327.568	0.806012	1.74837	0.235284	3.42569	0.000613231	0.0017196		327.568	0.159262	1.11672	0.238982	0.666418	0.505144	0.849031
C10F3.6	fut-8	344.399	420.082	538.237	674.23	685.305	701.486	540.443	548.546	487.262	225.166	329.596	347.167	1585.81	1448.14	1464.18	1782.29	1367.21	1600.65	532.16	361.203	395.259	376.723	367.843	422.212		731.067	0.660646	1.58079	0.17654	3.7422	0.000182417	0.000761078		731.067	-0.796772	0.575636	0.182067	-4.37626	1.20733e-05	6.1007e-05		731.067	0.0788067	1.05614	0.172774	0.456125	0.6483	0.906998
C10G11.5	pnk-1	1365.27	1430.09	1115.8	1022.08	1021.76	1033.03	1178.11	1160.28	1230.57	2602.66	1568.27	1582.77	1506.09	1599.69	1586.36	1495.97	1830.5	1691.53	1267.58	1356.49	1338.89	1381.68	1545.84	1355.47		1427.78	-0.345924	0.786804	0.158988	-2.17579	0.0295708	0.0620879		1427.78	0.686217	1.60906	0.158962	4.31685	1.58269e-05	7.73481e-05		1427.78	0.0967285	1.06935	0.158392	0.610693	0.541403	0.863738
C10G11.6	C10G11.6	162.951	202.657	225.165	391.655	381.61	376.918	24867	26674.8	26431.6	45432.3	27812.1	31164	589.757	569.549	562.998	490.573	569.329	583.389	768.108	1207.03	862.186	960.002	1091.12	945.797		8055.11	0.959578	1.94474	0.18696	5.13253	2.85871e-07	2.44436e-06		8055.11	0.421074	1.33892	0.174722	2.40996	0.0159541	0.0277083		8055.11	-0.0680204	0.953946	0.181376	-0.375023	0.707643	0.926749
C10G11.8	C10G11.8	0	0	0	0	0	0	0	0	0	0	0	0	0.960516	1.98104	2.93228	0.932649	8.23622	22.4756	32.6855	30.5721	30.4046	39.5988	33.8506	43.8933		10.3551	0	1	1.73583	0	1	1		10.3551	0	1	1.73582	0	1	1		10.3551	2.42763	5.38008	0.805748	3.01289	0.00258775	0.0735328
C10G6.1	egal-1	1378.48	1483.42	1706.47	2097.41	2119.66	2049.49	3799.3	4190.2	3459.56	2137.43	2978.21	2864.96	2410.9	2659.55	2269.58	2116.18	2318.5	2382.41	3642.39	2869.25	3352.1	2897.13	2871.66	2723.48		2615.74	0.455714	1.37146	0.134673	3.38386	0.00071474	0.0025723		2615.74	-0.519132	0.697791	0.134084	-3.8717	0.00010808	0.000395205		2615.74	-0.106675	0.928726	0.134342	-0.79406	0.427161	0.807496
C10G8.5	ncx-2	1056.98	1467.01	2715.09	2947.72	2864.29	2639.3	3260.77	3550.71	2976.12	1293.05	2078.82	2142.89	4731.5	5251.74	5088.48	3475.98	4062.52	3962.55	4666.87	3141	3396.62	2333.12	2011.85	2292.9		3058.66	0.689529	1.61276	0.241398	2.8564	0.00428476	0.0121984		3058.66	-0.826629	0.563845	0.241695	-3.42013	0.000625916	0.00174832		3058.66	-0.390098	0.763078	0.240921	-1.61919	0.105406	0.502808
C10G8.6	ceh-34	974.183	918.11	1071.08	1491.04	1522.9	1380.29	2202.76	2301.4	2208.92	1369.21	1688.91	1855.62	2413.78	2432.72	2199.21	2107.79	2194.95	2164.5	2489.2	2234.03	2644.11	1900.74	2116.79	1964.75		1910.29	0.568101	1.48257	0.11356	5.00264	5.65495e-07	4.47999e-06		1910.29	-0.447351	0.733388	0.112871	-3.96339	7.38936e-05	0.000288715		1910.29	-0.123642	0.917867	0.111839	-1.10554	0.268925	0.696672
C10G8.7	ceh-33	26.4245	22.1528	32.3868	22.3312	27.4476	29.6648	33.3607	36.3783	38.2166	6.62254	19.388	17.7465	13.4472	20.8009	19.5485	12.1244	16.4724	10.7492	28.5998	13.5876	23.8893	23.5452	11.2835	9.40572		21.4823	-0.0306145	0.979003	0.327334	-0.0935266	0.925485	0.954483		21.4823	-1.2356	0.424665	0.371813	-3.32318	0.000889965	0.00236036		21.4823	-0.454633	0.729696	0.391065	-1.16255	0.245012	0.675424
C10H11.1	viln-1	1869.97	2035.59	2156.03	1978.03	2077.16	2066.94	1839.6	1925.18	1706.37	2269.88	1814.93	1775.76	2858.5	3154.81	3313.48	2577.84	2576.91	2290.56	1822.21	1459.53	1452.9	1431.98	1358.54	1446.39		2052.46	0.0141418	1.00985	0.119926	0.117921	0.90613	0.941307		2052.46	0.0971066	1.06963	0.120915	0.803099	0.421917	0.487326		2052.46	-0.325029	0.798282	0.119559	-2.71856	0.00655665	0.133365
C10H11.10	kca-1	263.364	215.785	124.149	166.625	199.217	181.479	286.902	241.245	334.395	2096.03	830.452	760.883	623.375	626.009	1069.3	671.507	830.829	798.373	837.565	1657.69	985.976	1241.47	1692.53	1260.37		749.814	-0.139412	0.907889	0.330013	-0.422445	0.672701	0.765677		749.814	2.09385	4.26887	0.325231	6.43806	1.21008e-10	2.98077e-09		749.814	-0.0113065	0.992194	0.323278	-0.0349746	0.9721	1
C10H11.8	mlst-8	687.037	661.302	508.935	513.618	448.901	474.637	775.873	734.267	748.09	2574.51	1318.38	1288.84	1195.84	1141.08	1111.33	1423.22	1298.23	1305.54	703.759	629.558	735.139	668.898	724.403	693.933		931.889	-0.369465	0.774069	0.195399	-1.89083	0.0586473	0.110478		931.889	1.19537	2.29003	0.193362	6.18201	6.32899e-10	1.24919e-08		931.889	0.223884	1.16787	0.192586	1.16252	0.245025	0.675424
C10H11.9	let-502	4097.56	5081.19	6306.94	5745.99	7423.25	7130.9	4959.3	4924.47	4800.01	10471.9	5893.95	6601.71	5567.15	5559.79	5759.97	4661.38	4835.69	3994.79	5957.95	7362.21	6441.42	6779.95	7562.23	6759.58		6028.3	0.390455	1.31081	0.183702	2.12548	0.0335462	0.0689937		6028.3	0.644837	1.56356	0.183841	3.50757	0.000452216	0.00132912		6028.3	-0.323826	0.798948	0.183896	-1.76092	0.0782516	0.444382
C11D2.2	asp-9	17.6163	9.02521	13.88	9.44781	7.08326	14.8324	0	0	0.955415	0	0	1.10916	1.92103	0	1.95485	0	0	0.9772	12.257	7.9261	5.42939	18.194	9.02683	19.8565		6.31219	-0.365719	0.776082	0.51769	-0.706444	0.479912	0.593725		6.31219	0.394012	1.31404	1.71548	0.229681	0.81834	NA		6.31219	-1.89008	0.269792	1.44091	-1.31173	0.189611	0.617417
C11D2.4	C11D2.4	909.003	850.831	508.164	390.796	404.631	387.388	483.253	481.533	537.899	1773.19	1023.26	920.602	615.691	609.17	557.133	802.078	707.286	705.539	551.567	831.108	547.282	565.085	732.302	562.253		685.71	-0.938724	0.521694	0.228951	-4.1001	4.12971e-05	0.000202778		685.71	1.3041	2.46929	0.228403	5.70963	1.13223e-08	1.44978e-07		685.71	0.31385	1.24302	0.228447	1.37384	0.169491	0.598371
C11E4.3	del-8	14.0931	17.2299	13.1089	18.0367	21.2498	18.3224	20.0164	17.2318	19.1083	4.96691	12.9253	7.76411	42.2627	53.4881	39.0971	56.8916	54.565	56.6776	28.5998	23.7783	18.4599	26.7559	15.797	32.3975		26.3677	0.375152	1.29698	0.333648	1.12439	0.260846	0.369535		26.3677	-1.06777	0.477055	0.415326	-2.57093	0.0101426	0.0186871		26.3677	0.319377	1.24779	0.261577	1.22097	0.222098	0.65592
C11E4.6	C11E4.6	899.314	1178.2	2240.86	2432.38	2435.75	2467.42	2775.61	2997.38	2708.6	1365.9	2046.51	2000.92	2410.9	2671.43	2503.19	1953.9	2240.25	2114.66	3142.91	2288.38	2559.41	2621.01	2049.09	2522.82		2276.12	0.763974	1.69816	0.228126	3.34892	0.000811275	0.00286702		2276.12	-0.646852	0.638672	0.228304	-2.83329	0.00460713	0.00945375		2276.12	-0.265911	0.831673	0.228008	-1.16624	0.243519	0.674016
C11G10.1	C11G10.1	18.4971	20.5118	20.0489	23.1901	31.8747	41.0073	49.5644	58.3967	53.5032	52.9803	94.7857	57.6762	14.4077	18.8199	28.3454	29.8448	25.7382	47.8828	79.6708	91.7162	48.8645	88.8296	73.343	90.9219		48.3509	0.699908	1.6244	0.328188	2.13264	0.0329541	0.0680015		48.3509	0.362317	1.28549	0.291243	1.24404	0.213485	0.268785		48.3509	0.751163	1.68315	0.335442	2.23932	0.0251348	0.272815
C11H1.3	C11H1.3	1337.08	1395.63	1422.7	1222.2	1311.29	1332.3	1972.09	2091.75	1910.83	1673.85	1519.8	1786.85	1973.86	2042.45	1759.37	2256.08	2087.88	2033.55	1818.13	1749.4	1863.37	2151.18	2183.36	2221.84		1796.54	-0.104478	0.930142	0.0923189	-1.13171	0.257758	0.366208		1796.54	-0.262896	0.833413	0.0922271	-2.85053	0.00436463	0.00904183		1796.54	0.143157	1.10432	0.0911701	1.57022	0.116363	0.523699
C11H1.7	C11H1.7	619.214	517.719	303.048	208.711	231.091	207.654	180.148	193.379	144.268	124.173	106.634	146.409	173.853	160.464	96.7652	225.701	132.809	143.648	170.577	98.51	201.973	203.345	232.441	218.422		210.04	-1.15254	0.449832	0.267074	-4.31543	1.59291e-05	8.64939e-05		210.04	-0.456886	0.728557	0.27962	-1.63395	0.102268	0.141172		210.04	0.221445	1.1659	0.275866	0.802729	0.422131	0.80308
C11H1.9	C11H1.9	825.325	757.297	826.633	838.279	795.981	836.723	2135.08	2397.14	2118.16	1177.16	1605.97	1704.78	1799.05	1760.15	1735.91	1758.04	1705.93	1603.59	2138.86	1673.54	1900.28	1923.22	1950.92	2092.25		1585.84	0.0365408	1.02565	0.128539	0.284279	0.776197	0.844665		1585.84	-0.564175	0.676342	0.126354	-4.46503	8.00585e-06	4.30737e-05		1585.84	-0.0633469	0.957041	0.125943	-0.502979	0.614979	0.894168
C12C8.2	cbl-1	212.277	215.785	182.754	185.521	177.967	180.606	332.653	365.697	289.491	170.53	221.885	215.177	713.664	742.89	649.989	896.276	758.762	728.991	410.611	298.927	380.057	231.171	211.002	237.233		375.413	-0.165728	0.891478	0.15515	-1.06818	0.285439	0.396967		375.413	-0.690709	0.619549	0.155681	-4.43671	9.13451e-06	4.82737e-05		375.413	0.178893	1.13202	0.140522	1.27306	0.202995	0.633605
C12C8.3	lin-41	318.856	476.695	679.351	664.783	731.346	650.009	546.162	497.808	586.625	2473.52	1057.72	915.056	1240.03	1173.77	1338.1	746.119	971.874	868.731	1802.81	2801.31	1805.81	1826.89	1906.92	1840.39		1163.36	0.471579	1.38663	0.280146	1.68333	0.0923109	0.159921		1163.36	1.44503	2.72269	0.279735	5.16572	2.39521e-07	2.00395e-06		1163.36	-0.536621	0.689384	0.278859	-1.92435	0.0543109	0.377263
C12D12.1	C12D12.1	591.028	680.173	1197.54	1964.29	2060.34	1957.01	2977.68	3275.96	3041.09	1513.25	2700.32	2240.5	1755.82	2012.74	1866.88	1681.57	1725.49	1760.91	2893.69	2151.37	2328.12	2325.62	1851.63	2190.49		2030.98	1.27606	2.42177	0.212845	5.99525	2.03171e-09	2.81451e-08		2030.98	-0.525036	0.694942	0.21197	-2.47693	0.0132516	0.0236353		2030.98	-0.124926	0.917051	0.212274	-0.588512	0.556188	0.870623
C12D12.2	glt-1	103.936	121.43	273.745	339.262	273.591	230.339	155.365	122.537	143.312	61.2585	135.716	88.7327	420.706	457.62	565.93	593.165	515.794	678.177	363.626	197.02	235.635	216.188	117.349	239.323		277.073	0.75443	1.68696	0.317059	2.37946	0.0173378	0.0399059		277.073	-0.547585	0.684165	0.329922	-1.65974	0.0969666	0.134686		277.073	0.307421	1.23749	0.312234	0.984587	0.324827	0.738341
C12D12.5	sox-4	161.189	137.019	134.174	143.435	177.081	165.774	378.405	384.844	355.414	172.186	294.051	247.342	253.576	267.441	247.289	260.209	265.618	246.254	186.92	112.098	123.79	132.709	101.552	122.274		211.277	0.170533	1.12547	0.190093	0.897106	0.369663	0.486625		211.277	-0.636715	0.643176	0.184073	-3.45903	0.000542127	0.00154503		211.277	0.00704078	1.00489	0.183625	0.0383432	0.969414	1
C12D8.1	fubl-1	4844.49	5191.14	5014.55	3937.16	4095.89	4019.59	5777.11	5977.52	6103.19	8223.54	5698.99	6982.15	7051.15	7384.33	6458.83	6845.64	7697.78	7493.17	1501.49	1976.99	2057.74	1929.64	2233.01	1872.78		5015.33	-0.320451	0.800819	0.134727	-2.37853	0.0173819	0.0399786		5015.33	0.22672	1.17017	0.134631	1.68402	0.0921787	0.128863		5015.33	0.0767662	1.05465	0.134449	0.57097	0.56802	0.876434
C12D8.11	rop-1	860.558	861.497	655.446	611.531	640.149	629.941	1362.07	1271.32	1383.44	7524.86	3487.68	3254.27	625.296	673.554	646.079	672.44	702.138	752.444	2663.87	2980.21	2893.86	3086.56	3293.66	3134.19		1861.13	-0.33723	0.79156	0.214306	-1.57359	0.115582	0.192094		1861.13	1.8275	3.54922	0.211949	8.62235	6.55913e-18	3.12433e-15		1861.13	0.129106	1.09362	0.215044	0.600368	0.548261	0.868042
C12D8.5	daf-36	54.6106	24.6142	24.6756	13.7423	23.906	19.1949	56.2365	70.8419	64.9682	21.5233	39.8531	38.8206	101.815	98.0615	89.9232	97.9282	91.628	75.2444	120.528	100.775	131.391	93.1106	104.937	130.635		70.3735	-0.860432	0.550788	0.306727	-2.8052	0.0050285	0.0139944		70.3735	-0.901767	0.535231	0.284962	-3.16451	0.00155342	0.00378166		70.3735	-0.129864	0.913918	0.245305	-0.529396	0.596531	0.885415
C12D8.9	C12D8.9	0.880817	0	0	0	0	0.872495	0	0	0.955415	1.65564	0	0	0	0	0	0	0	0	0	0	0	0	0	2.09016		0.268938	0.0839074	1.05988	3.5063	0.0239305	0.980908	NA		0.268938	0.393958	1.31399	3.5062	0.11236	0.910538	NA		0.268938	0	1	3.5063	0	1	1
C13A10.1	C13A10.1	14.9739	18.0504	28.5312	11.1656	16.8227	10.4699	32.4075	29.677	35.3504	13.2451	34.4675	17.7465	160.406	173.341	194.508	128.706	153.4	175.896	66.3924	35.1013	38.0057	53.5118	16.9253	71.0654		63.7569	-0.687831	0.620786	0.412318	-1.66821	0.0952744	0.164214		63.7569	-0.536549	0.689418	0.392963	-1.36539	0.172129	0.222761		63.7569	-0.206141	0.866853	0.321498	-0.64119	0.521399	0.85613
C13A10.2	C13A10.2	69.5845	56.6127	43.1823	23.1901	46.9266	45.3697	5.71897	18.1891	11.465	3.31127	10.7711	7.76411	18.2498	5.94312	8.79684	19.5856	11.3248	11.7264	69.4566	47.5566	64.0667	39.5988	32.7223	45.9835		29.879	-0.550886	0.682601	0.333386	-1.65239	0.0984541	0.168795		29.879	-0.618379	0.651402	0.503932	-1.22711	0.219782	0.275595		29.879	0.372231	1.29435	0.440673	0.844688	0.398285	0.789377
C13B4.1	C13B4.1	442.17	605.509	677.037	511.041	494.057	479.872	559.506	556.205	652.549	1299.67	672.117	704.316	738.637	713.175	768.257	547.465	703.168	767.102	1670.02	1749.4	1294.37	1518.67	1332.59	1385.78		868.445	-0.21651	0.860645	0.210278	-1.02964	0.303181	0.415965		868.445	0.593435	1.50883	0.210052	2.82518	0.00472537	0.0096603		868.445	-0.138118	0.908704	0.209586	-0.659004	0.509893	0.852265
C13B4.2	usp-14	5032.1	4524.91	3112.98	3343.67	3446	3326.82	2843.28	2580.94	2860.51	9165.6	4326.75	4899.15	1667.46	1628.42	2156.2	1381.25	1823.29	1653.42	1677.17	2802.44	2175.01	2403.75	3026.24	2461.16		3096.61	-0.324639	0.798498	0.236381	-1.37337	0.169637	0.261539		3096.61	1.14996	2.21908	0.236529	4.86183	1.16304e-06	8.06785e-06		3096.61	-0.166548	0.890972	0.237389	-0.701581	0.482941	0.839036
C13B9.3	copd-1	2927.83	2989.81	2676.53	3429.56	3428.3	3326.82	4702.9	5090.09	4952.87	5710.29	4369.84	4844.8	3683.58	3870.95	3492.34	3104.79	3476.72	3493.49	3469.77	4128.36	3861.38	3849.64	4339.65	3746.61		3873.62	0.245057	1.18514	0.110568	2.21634	0.0266682	0.0571549		3873.62	0.0164886	1.01149	0.110276	0.149522	0.881142	0.904105		3873.62	-0.132934	0.911975	0.110606	-1.20187	0.229415	0.66257
C13C12.1	cal-1	142.692	112.405	96.3892	85.0303	71.718	70.6721	188.726	182.849	191.083	74.5036	115.251	116.462	116.222	105.986	107.517	193.058	160.606	195.44	581.188	382.717	489.731	459.131	446.828	547.622		218.076	-0.624309	0.648731	0.201579	-3.09709	0.00195431	0.00617854		218.076	-0.857247	0.552005	0.199371	-4.29976	1.7098e-05	8.26e-05		218.076	0.736512	1.66614	0.194004	3.79638	0.000146824	0.00819084
C13C12.2	C13C12.2	469.475	472.593	475.006	715.457	652.545	736.386	874.049	1015.72	757.644	299.67	588.102	602.273	881.754	833.028	828.858	921.457	868.922	764.171	1097.01	820.917	982.719	791.975	834.982	798.441		753.465	0.570493	1.48503	0.184071	3.09931	0.00193975	0.00614295		753.465	-0.820956	0.566067	0.185287	-4.43072	9.39194e-06	4.94513e-05		753.465	0.00621442	1.00432	0.182774	0.0340006	0.972877	1
C13C4.3	nhr-136	261.603	205.118	180.441	128.834	127.499	122.149	329.794	343.679	300	127.484	165.875	174.138	106.617	138.673	108.494	102.591	82.3622	97.72	236.97	178.903	216.09	148.763	159.098	145.266		174.507	-0.77154	0.585792	0.172678	-4.46809	7.8922e-06	4.63379e-05		174.507	-1.04605	0.484293	0.173166	-6.04073	1.53415e-09	2.61611e-08		174.507	-0.32106	0.800481	0.187917	-1.70852	0.0875391	0.46706
C13C4.4	C13C4.4	702.892	508.694	326.181	103.067	132.811	116.914	432.735	434.625	398.408	399.008	366.218	370.459	140.235	135.701	187.666	181.867	143.104	158.306	375.883	428.009	522.307	477.326	542.738	419.077		333.51	-2.12311	0.229551	0.218972	-9.69582	3.141e-22	6.87233e-20		333.51	-0.157597	0.896517	0.21353	-0.738057	0.46048	0.525748		333.51	0.060918	1.04313	0.22424	0.271665	0.78588	0.952307
C13C4.5	spin-1	288.908	311.78	357.025	403.679	420.568	379.535	664.354	663.425	533.122	241.723	397.454	437.008	537.889	576.483	583.524	458.863	472.553	538.437	322.769	236.651	297.53	168.027	139.916	156.762		399.499	0.329095	1.25623	0.174693	1.88385	0.0595852	0.111933		399.499	-0.779904	0.582406	0.175305	-4.44883	8.63382e-06	4.58993e-05		399.499	-0.208077	0.86569	0.172638	-1.20528	0.228095	0.66122
C13C4.6	C13C4.6	70.4653	59.8946	37.7846	36.9324	42.4995	40.1348	10.4848	8.61591	13.3758	11.5894	6.46266	5.54579	9.60516	3.96208	9.77426	1.8653	12.3543	4.886	8.17137	3.3969	3.25763	12.8428	7.89848	10.4508		18.0104	-0.488658	0.712688	0.336483	-1.45225	0.146432	0.232907		18.0104	-0.527634	0.693691	0.513796	-1.02693	0.304452	0.366769		18.0104	-0.320602	0.800736	0.532328	-0.602264	0.546998	0.866404
C13D9.1	srr-6	14.9739	14.7685	16.1934	46.3802	45.1558	49.7322	5.71897	12.4452	8.59874	9.93381	11.8482	8.87327	11.5262	2.97156	8.79684	58.7569	56.624	39.088	0	1.1323	3.25763	17.1238	25.9521	34.4876		21.0141	1.61944	3.07257	0.334037	4.84809	1.24653e-06	9.07335e-06		21.0141	0.201959	1.15026	0.468981	0.430634	0.666735	0.720263		21.0141	2.72352	6.60485	0.401909	6.77648	1.23142e-11	3.89283e-09
C13F10.2	kxd-1	1682.36	1209.38	574.479	219.017	191.248	195.439	1451.66	1307.7	1427.39	3082.79	1906.49	1783.53	380.364	347.673	306.912	547.465	408.723	428.991	166.492	260.429	249.752	301.807	366.715	261.27		794.087	-2.51618	0.174805	0.274482	-9.16701	4.86312e-20	6.95707e-18		794.087	0.693085	1.61674	0.269661	2.57021	0.0101636	0.0187203		794.087	0.420746	1.33862	0.274378	1.53345	0.125164	0.536811
C13F10.4	soap-1	2115.72	3155.54	4369.9	3762.81	3633.71	3865.15	2285.68	2226.73	2165.93	4475.18	2724.01	2860.52	2358.07	2550.59	2642.96	2057.42	2233.05	2115.64	1319.68	1611.26	1405.12	1595.72	1665.45	1561.35		2531.55	0.223939	1.16792	0.197239	1.13537	0.256221	0.36465		2531.55	0.590067	1.50532	0.197805	2.98307	0.00285374	0.00628931		2531.55	-0.237361	0.848295	0.197868	-1.1996	0.230296	0.662763
C13F10.6	C13F10.6	2239.92	2065.95	1387.23	1248.83	1315.71	1239.82	653.869	545.674	711.784	4198.69	1945.26	1631.57	793.387	770.625	834.722	993.271	969.815	887.298	706.823	1034.92	818.751	849.768	964.742	842.334		1235.45	-0.581427	0.668303	0.246437	-2.35934	0.0183076	0.0416103		1235.45	2.02289	4.06396	0.24766	8.16799	3.13579e-16	8.29823e-14		1235.45	0.24889	1.18829	0.248022	1.0035	0.31562	0.730171
C13F10.7	C13F10.7	7835.74	5137.8	2805.31	2400.6	2319.77	2388.89	762.529	655.766	742.358	2306.3	1269.91	1153.52	636.822	606.199	597.208	910.266	797.884	747.558	864.122	1597.67	1318.25	1454.45	2051.35	1528.95		1787.05	-1.15013	0.450583	0.279022	-4.12202	3.75557e-05	0.000186999		1787.05	1.12889	2.18691	0.281021	4.01712	5.89146e-05	0.000237152		1787.05	0.416308	1.33451	0.281821	1.47721	0.139621	0.558275
C13G3.2	hot-6	282.742	223.169	146.512	149.447	124.842	160.539	437.501	432.71	382.166	268.213	304.822	307.237	306.405	288.241	265.86	422.49	280.032	320.522	113.378	60.0119	109.674	123.077	84.6265	106.598		237.534	-0.583082	0.667536	0.227909	-2.55839	0.0105158	0.026154		237.534	-0.506549	0.703904	0.223007	-2.27145	0.0231199	0.0381682		237.534	0.250355	1.1895	0.222461	1.12539	0.260424	0.69037
C13G5.1	ceh-16	674.705	539.051	491.97	687.973	640.149	643.029	622.414	677.785	648.727	397.353	358.678	484.702	222.84	227.82	180.824	246.219	264.589	230.619	51.071	45.292	44.521	47.0904	54.161	38.6679		355.01	0.209653	1.15641	0.147968	1.41688	0.156518	0.245641		355.01	-0.650391	0.637107	0.152048	-4.27755	1.88963e-05	9.00095e-05		355.01	0.231164	1.17378	0.161044	1.43541	0.15117	0.57051
C14A11.1	tsp-6	30.8286	28.7166	70.1713	47.2391	58.4369	55.8397	103.895	102.434	108.917	41.3909	86.1689	70.9861	209.393	184.237	165.185	206.115	184.286	241.368	128.699	82.6579	97.7289	101.672	68.8296	85.6965		106.704	0.30692	1.23706	0.284073	1.08042	0.279954	0.390727		106.704	-0.642603	0.640556	0.275062	-2.33622	0.01948	0.0328653		106.704	0.177182	1.13067	0.25137	0.704866	0.480894	0.838008
C14A11.2	C14A11.2	648.281	504.591	492.741	676.807	610.931	675.311	756.81	812.767	753.823	442.055	580.563	671.041	576.31	518.042	452.548	624.875	575.506	561.89	536.246	397.437	477.786	463.412	484.064	475.511		573.723	0.255352	1.19363	0.153208	1.6667	0.0955745	0.164655		573.723	-0.450502	0.731788	0.154662	-2.91281	0.00358193	0.00764652		573.723	0.188138	1.13929	0.15484	1.21505	0.224348	0.659137
C14A11.5	C14A11.5	84.5584	54.1512	103.329	47.2391	47.812	61.9472	45.7517	46.9088	42.0383	66.2254	42.0073	36.6022	126.788	141.644	129.02	159.483	146.193	148.534	507.646	358.939	432.179	406.69	411.849	431.618		169.965	-0.626596	0.647703	0.223511	-2.80342	0.00505638	0.0140562		169.965	0.0647838	1.04593	0.25415	0.254904	0.798797	0.834416		169.965	0.193232	1.14332	0.202293	0.95521	0.339472	0.749366
C14A11.6	C14A11.6	51.0874	42.6646	61.6891	36.9324	39.8433	39.2623	183.96	228.8	192.038	112.583	129.253	160.828	409.18	339.749	373.377	421.557	341.803	348.86	179.77	149.464	178.084	170.168	161.355	157.807		187.921	-0.425313	0.744677	0.216617	-1.96343	0.0495959	0.0959541		187.921	-0.574837	0.671362	0.173288	-3.31723	0.000909135	0.00240406		187.921	-0.012463	0.991399	0.154672	-0.0805773	0.935778	0.992417
C14A11.7	ssr-2	112.745	89.4316	96.3892	78.1592	53.1244	62.8197	37.1733	46.9088	39.172	13.2451	35.5447	29.9473	28.8155	42.5924	42.0293	43.8345	29.8563	45.9284	151.17	117.759	128.133	86.6892	54.161	75.2457		64.2031	-0.619075	0.651088	0.234242	-2.64289	0.00822021	0.0212401		64.2031	-0.58718	0.665643	0.295982	-1.98384	0.0472738	0.0712297		64.2031	0.0818136	1.05835	0.273296	0.299359	0.764666	0.945072
C14A4.10	taf-13	3791.03	2546.75	1447.38	1223.06	1230.72	1197.06	976.99	836.7	953.504	2341.07	1402.4	1466.31	640.664	530.919	465.255	897.208	701.109	710.425	413.675	473.301	506.019	465.553	538.225	396.085		1089.64	-1.09229	0.469017	0.245831	-4.44325	8.86114e-06	5.1378e-05		1089.64	0.911551	1.88107	0.246871	3.69242	0.000222132	0.000726708		1089.64	0.4963	1.41059	0.248675	1.99577	0.0459586	0.352762
C14A4.12	C14A4.12	215.8	262.552	360.881	563.433	577.285	519.135	998.913	1001.36	881.848	475.167	706.585	674.368	800.11	906.326	1074.19	961.561	1136.6	1200.98	684.352	588.796	652.612	514.784	460.368	517.314		697.305	0.981848	1.97499	0.177927	5.51827	3.42354e-08	3.57191e-07		697.305	-0.630407	0.645994	0.175043	-3.60145	0.000316448	0.000985624		697.305	0.246577	1.18639	0.172837	1.42664	0.153683	0.575695
C14A4.13	C14A4.13	7.04653	3.28189	3.08445	6.87114	2.65622	9.59745	4.76581	4.78661	3.82166	3.31127	4.30844	4.43663	722.308	717.137	629.463	678.969	687.725	751.467	0	2.2646	2.17175	1.07024	11.2835	3.13524		177.707	0.542004	1.45599	0.50236	1.07892	0.280625	0.391443		177.707	-0.119475	0.920522	0.620742	-0.192471	0.847373	0.875811		177.707	0.0339218	1.02379	0.17259	0.196546	0.844183	0.967705
C14A4.15	srv-2	110.983	78.7655	60.1468	47.2391	45.1558	58.4572	24.7822	19.1465	24.8408	14.9007	20.4651	16.6374	26.8945	35.6587	17.5937	33.5754	30.8858	46.9056	7.14995	2.2646	6.51526	6.42142	2.25671	1.04508		30.7786	-0.724612	0.60516	0.287257	-2.52252	0.0116518	0.028597		30.7786	-0.385707	0.765404	0.376728	-1.02383	0.305913	0.368034		30.7786	0.476299	1.39117	0.327508	1.45431	0.145859	0.565586
C14A4.2	dap-3	785.688	727.76	577.564	520.489	522.39	516.517	702.48	746.712	702.23	1152.32	759.363	747.573	159.446	188.199	135.862	206.115	203.847	181.759	870.251	906.972	878.475	743.814	987.31	759.773		611.788	-0.422668	0.746044	0.168883	-2.50273	0.012324	0.0299995		611.788	0.301319	1.23227	0.168711	1.78601	0.0740974	0.10631		611.788	0.291691	1.22407	0.184891	1.57764	0.114648	0.521795
C14A4.4	crn-3	2348.26	2553.31	1822.14	1405.15	1614.98	1603.65	1948.26	1818.91	1947.14	5554.66	2978.21	3165.54	1435.97	1358	1426.07	1298.25	1355.89	1225.41	1072.49	1604.47	1329.11	1300.34	1495.07	1285.45		1872.78	-0.540111	0.687718	0.193711	-2.78822	0.00529978	0.0146507		1872.78	1.03256	2.04565	0.193526	5.33553	9.5266e-08	9.21077e-07		1872.78	-0.121412	0.919288	0.194637	-0.623787	0.532768	0.859292
C14A4.5	crn-5	798.901	625.201	322.325	285.152	211.612	236.446	201.117	191.465	208.281	433.776	252.044	251.779	374.601	290.223	284.431	447.672	406.664	345.929	71.4995	74.7318	95.5572	84.5487	83.4982	78.381		277.326	-1.25112	0.420123	0.252219	-4.96044	7.03331e-07	5.45576e-06		277.326	0.634897	1.55283	0.25751	2.46553	0.0136812	0.0243286		277.326	0.338464	1.26441	0.252972	1.33795	0.180913	0.611327
C14A4.6	C14A4.6	264.245	186.247	97.9314	66.9936	54.0098	59.3297	142.021	160.83	147.134	97.6825	142.179	122.007	104.696	95.09	85.0361	183.732	115.307	121.173	310.512	224.195	297.53	288.964	295.629	314.569		165.71	-1.60134	0.329572	0.265054	-6.04154	1.52648e-09	2.21786e-08		165.71	-0.306231	0.808752	0.262177	-1.16803	0.242795	0.301123		165.71	0.562536	1.47686	0.262745	2.14099	0.0322746	0.301782
C14A4.8	C14A4.8	2.64245	5.74331	3.08445	1.71778	2.65622	0.872495	0.953161	0.957323	3.82166	0	0	0	0	0	1.95485	0.932649	1.02953	0	0	0	0	1.07024	0	0		1.14317	-1.13159	0.456412	1.13902	-0.993478	0.320477	NA		1.14317	-3.04873	0.120848	1.5925	-1.91443	0.0555647	NA		1.14317	0.00356098	1.00247	1.69776	0.00209746	0.998326	1
C14A4.9	C14A4.9	2635.4	1914.99	1658.66	1802.81	2030.24	2011.97	1100.9	1227.29	1110.19	501.658	868.151	710.971	3337.79	2901.23	2707.47	3201.78	2277.32	2495.77	4164.33	3268.95	3222.88	2391.98	2281.53	2486.24		2179.61	-0.0869397	0.941518	0.188486	-0.461252	0.644618	0.743139		2179.61	-0.720569	0.606858	0.191813	-3.75662	0.00017222	0.00058596		2179.61	-0.16576	0.891459	0.18821	-0.880718	0.378471	0.778384
C14B1.1	pdi-1	9784.11	9907.22	8014.18	10190.8	11059.6	10493.5	12222.4	10829.2	12152.9	52344.6	24279.2	22707.8	8103.88	8860.21	11821	6989.27	8808.64	9108.48	3161.3	3501.07	3567.11	2792.25	3469.69	2787.23		11123.1	0.196318	1.14577	0.228244	0.860124	0.389721	0.507373		11123.1	1.49636	2.82131	0.228165	6.55824	5.44457e-11	1.56231e-09		11123.1	-0.208818	0.865246	0.228317	-0.914599	0.360402	0.767866
C14B1.10	alkb-8	841.18	807.346	677.809	621.838	621.556	642.156	760.623	664.382	795.861	2932.13	1516.57	1447.45	2656.79	2621.91	2797.39	2511.62	2794.14	2682.41	423.89	549.165	477.786	608.965	710.863	566.433		1322.09	-0.302824	0.810664	0.198538	-1.52527	0.127191	0.20784		1322.09	1.40622	2.65042	0.197648	7.11478	1.12088e-12	6.45864e-11		1322.09	-0.015825	0.989091	0.195509	-0.0809423	0.935488	0.992417
C14B1.2	C14B1.2	1572.26	1090.41	631.542	338.404	325.83	288.796	1042.76	821.383	1214.33	6581.15	3055.76	2349.2	385.167	336.777	486.758	682.699	695.961	647.884	176.706	297.795	194.372	261.138	372.357	258.135		1004.48	-1.78903	0.289367	0.31136	-5.74584	9.14635e-09	1.07658e-07		1004.48	1.96044	3.8918	0.308849	6.34755	2.18767e-10	4.94649e-09		1004.48	0.745527	1.67659	0.31178	2.3912	0.0167935	0.22662
C14B1.8	C14B1.8	2095.46	1499.01	873.671	458.648	436.506	472.892	500.41	455.686	537.899	1024.84	602.105	610.037	449.522	346.682	402.7	642.595	443.727	479.805	267.612	362.336	287.757	434.516	581.102	410.716		611.51	-1.70722	0.306251	0.250112	-6.82579	8.7441e-12	2.01603e-10		611.51	0.579398	1.49423	0.25173	2.30166	0.0213542	0.0356402		611.51	0.385751	1.30654	0.252669	1.52671	0.126834	0.538631
C14B1.9	C14B1.9	1722.88	1395.63	784.993	503.311	454.214	504.302	650.056	465.259	684.077	5394.06	2104.67	1679.27	65.3151	39.6208	66.465	55.9589	92.6575	79.1532	736.444	1459.53	860.015	1002.81	1350.64	1041.94		966.386	-1.41681	0.374541	0.34133	-4.15084	3.31259e-05	0.000167864		966.386	2.34986	5.09773	0.340911	6.89287	5.4676e-12	2.42646e-10		966.386	0.408117	1.32695	0.368286	1.10815	0.267796	0.696389
C14B4.2	C14B4.2	324.14	504.591	1074.16	716.316	711.867	699.741	1009.4	1056.88	937.262	415.564	612.876	624.456	455.285	496.251	451.571	406.635	402.545	418.242	1465.74	1066.63	1232.47	986.758	882.373	920.715		744.686	0.160266	1.11749	0.260349	0.615583	0.53817	0.647387		744.686	-0.859279	0.551228	0.261336	-3.28803	0.00100891	0.00262898		744.686	-0.192954	0.874813	0.262939	-0.733835	0.463049	0.828841
C14B9.1	hsp-12.2	2444.27	2285.02	2433.63	1692.88	1659.25	1770.29	3324.63	3423.39	3557.97	1693.72	2828.49	2237.17	3248.47	3425.22	3098.44	2952.77	2830.17	3216.94	2504.52	1915.85	1940.46	1740.2	1534.56	1695.12		2477.23	-0.483711	0.715136	0.14719	-3.2863	0.00101513	0.0034656		2477.23	-0.606582	0.656751	0.147164	-4.12182	3.75893e-05	0.00016113		2477.23	-0.118736	0.920994	0.146648	-0.809671	0.418129	0.80135
C14B9.2	C14B9.2	4752.01	5134.52	4633.62	6058.63	6014.57	6215.66	9146.54	10041.4	8914.02	5741.74	6348.49	7669.83	9454.36	10808.6	9438.03	8512.29	9338.85	8938.45	4915.08	4772.64	5456.53	4483.22	5249.1	4627.61		6944.4	0.33292	1.25956	0.113703	2.92798	0.00341173	0.00999602		6944.4	-0.507544	0.703419	0.113651	-4.46583	7.97581e-06	4.29924e-05		6944.4	-0.148853	0.901968	0.113382	-1.31284	0.189237	0.616576
C14B9.3	C14B9.3	363.777	287.166	285.312	338.404	308.122	369.065	602.398	547.589	636.307	309.604	473.929	481.375	668.519	586.388	573.749	564.253	509.616	526.711	538.289	412.157	418.063	298.596	240.339	328.155		444.495	0.118456	1.08557	0.171351	0.691303	0.489375	0.602426		444.495	-0.490278	0.711888	0.170111	-2.8821	0.00395034	0.00832111		444.495	-0.192056	0.875357	0.167707	-1.14519	0.252132	0.68197
C14B9.6	gei-8	1896.4	2949.6	4238.04	4202.56	4337.61	4164.42	4502.73	4498.46	4345.23	6412.28	3902.37	4646.27	4651.78	5014.01	4267.44	3180.33	3639.38	2437.14	1604.65	2274.79	2316.18	2197.2	2149.51	2066.12		3578.94	0.483756	1.39838	0.223266	2.16673	0.0302555	0.0633467		3578.94	0.164307	1.12063	0.223255	0.735961	0.461754	0.526745		3578.94	-0.589969	0.664357	0.223343	-2.64154	0.00825295	0.150156
C14B9.7	rpl-21	17358.3	14310.7	11638.4	15040.9	16473	15899.5	12740	13027.2	12906.7	8407.32	9796.32	9867.07	12306.1	11425.7	10224.9	12411.7	12031.1	13255.7	13671.7	10679.8	12935	10033.5	11684.1	10753.9		12453.3	0.130734	1.09485	0.136157	0.960172	0.336969	0.452802		12453.3	-0.462077	0.72594	0.136408	-3.38747	0.000705407	0.00193109		12453.3	0.150813	1.11019	0.136289	1.10657	0.268482	0.696406
C14B9.8	C14B9.8	853.511	1107.64	1193.68	1089.93	1104.1	1028.67	1804.33	1772.96	1804.78	5283.13	2579.68	2700.8	1164.15	1245.08	1236.44	894.411	1068.65	1026.06	1354.4	1487.84	1450.73	1345.29	1399.16	1277.09		1553.02	0.0304108	1.0213	0.196483	0.154775	0.876999	0.919002		1553.02	0.971463	1.96083	0.195245	4.9756	6.50453e-07	4.8361e-06		1553.02	-0.286594	0.819835	0.196821	-1.45612	0.145361	0.564717
C14C10.2	C14C10.2	443.051	348.701	236.732	175.214	170.884	166.647	138.208	139.769	172.93	369.207	203.574	205.194	163.288	142.635	146.614	230.364	147.223	190.554	239.012	315.912	242.151	300.736	420.876	320.839		234.596	-1.00302	0.498955	0.238423	-4.20688	2.58919e-05	0.000134881		234.596	0.776479	1.71294	0.243884	3.1838	0.00145356	0.0035704		234.596	0.329333	1.25643	0.244358	1.34775	0.177739	0.607982
C14C10.3	ril-2	1617.18	1797.66	1663.29	1488.46	1475.97	1562.64	1878.68	2010.38	1929.94	3597.7	2493.51	2390.24	1684.75	1691.81	1769.14	1750.58	1652.39	1572.32	958.093	1325.92	1108.68	1136.59	1355.15	1151.68		1710.95	-0.165751	0.891465	0.145061	-1.14263	0.253194	0.361817		1710.95	0.541824	1.45581	0.144775	3.74252	0.000182187	0.000615184		1710.95	-0.0485327	0.966919	0.145288	-0.334044	0.738346	0.935666
C14C10.4	mma-1	1167.08	1421.06	1468.97	1371.65	1364.41	1382.03	1406.87	1537.46	1429.3	1816.23	1385.16	1378.68	928.819	1016.27	835.7	835.654	797.884	713.356	1372.79	1334.98	1326.94	1169.77	1124.97	1092.11		1236.59	0.0211204	1.01475	0.123407	0.171143	0.864111	0.910757		1236.59	0.0635713	1.04505	0.124104	0.512241	0.608482	0.665586		1236.59	-0.244581	0.844061	0.126354	-1.93568	0.0529065	0.372358
C14C10.5	C14C10.5	1953.65	2938.12	4297.41	3737.9	3809.02	3733.41	6484.36	6344.18	6337.27	9187.12	6314.02	7380.34	2618.37	2718.98	3459.11	2270.07	2919.74	2462.54	4934.48	8594.15	5343.6	7278.68	7379.43	6946.64		4976.78	0.295623	1.22741	0.226531	1.305	0.191894	0.288371		4976.78	0.255445	1.1937	0.22625	1.12904	0.258881	0.318201		4976.78	-0.201079	0.8699	0.226862	-0.886349	0.375429	0.776761
C14C10.6	erg-28	773.357	669.506	320.783	202.699	193.904	188.459	790.171	785.962	875.16	3182.13	1436.87	1364.27	539.81	439.791	510.217	796.482	675.37	759.285	744.616	1267.04	842.641	937.527	1200.57	954.158		852.115	-1.59129	0.331874	0.288082	-5.52376	3.31825e-08	3.49144e-07		852.115	1.28599	2.43849	0.283147	4.54177	5.57837e-06	3.17589e-05		852.115	0.582683	1.49763	0.284943	2.04491	0.040864	0.339497
C14C11.3	hex-2	1011.18	1070.72	947.698	1051.28	1023.53	1088.87	766.342	776.389	657.326	394.041	512.705	534.614	529.245	527.947	437.887	552.128	528.148	544.301	742.573	526.519	554.883	482.677	523.556	561.208		681.074	0.0626002	1.04435	0.139736	0.44799	0.65416	0.75074		681.074	-0.603981	0.657936	0.145322	-4.15617	3.23628e-05	0.000142384		681.074	0.119952	1.0867	0.144913	0.827751	0.407811	0.796003
C14C11.4	C14C11.4	51.0874	54.1512	117.209	115.092	139.009	121.277	56.2365	44.0369	57.3249	13.2451	35.5447	34.3839	141.196	127.777	149.546	160.416	125.602	131.922	70.478	47.5566	59.7232	59.9332	41.7491	50.1638		83.5275	0.748858	1.68046	0.265222	2.82352	0.00474998	0.013334		83.5275	-0.869928	0.547174	0.317357	-2.74116	0.00612223	0.0120871		83.5275	-0.0012468	0.999136	0.259923	-0.0047968	0.996173	1
C14C11.8	pqn-13	1735.21	1988.01	3521.67	3941.46	4220.74	3984.69	6337.57	6957.82	6167.2	2731.8	4788.83	4026.25	8343.05	9029.59	8384.36	5768.43	6355.28	6000.99	10318.4	7604.52	8217.92	5716.13	4716.52	5800.19		5694.03	0.745304	1.67633	0.212499	3.50733	0.000452626	0.00170658		5694.03	-0.752565	0.593548	0.212373	-3.54359	0.000394717	0.00118648		5694.03	-0.507017	0.703676	0.21204	-2.39114	0.0167964	0.22662
C14C6.13	C14C6.13	0	0	0	0	0	0	0	0	0	1.65564	1.07711	0	0.960516	1.98104	0	0	0	2.9316	0	2.2646	2.17175	0	0	1.04508		0.586972	0	1	2.42557	0	1	NA		0.586972	2.3112	4.96295	2.3448	0.985667	0.324296	NA		0.586972	-0.00186486	0.998708	2.12008	-0.00087962	0.999298	1
C14F11.2	lrch-1	1234.9	1535.93	1923.93	2148.09	2141.8	2258.89	2429.61	2704.44	2484.08	1362.59	1810.62	2009.8	1562.76	1634.36	1485.69	1558.46	1746.08	1508.8	2422.81	2262.33	2577.87	3156.13	3171.8	3102.84		2093.11	0.479709	1.39446	0.147975	3.24183	0.00118765	0.00398509		2093.11	-0.553634	0.681302	0.148417	-3.73026	0.000191284	0.000641654		2093.11	0.0395633	1.0278	0.1487	0.266062	0.790192	0.952674
C14F11.3	lite-1	5.2849	4.10237	15.4223	24.049	16.8227	16.5774	50.5176	51.6954	53.5032	24.8345	39.8531	28.8381	23.0524	38.6303	43.0068	45.6998	18.5315	52.7688	43.9211	31.7044	35.8339	39.5988	25.9521	36.5778		31.9491	1.18914	2.28017	0.428076	2.77788	0.00547153	0.0150417		31.9491	-0.718307	0.60781	0.352485	-2.03784	0.0415664	0.0636229		31.9491	0.166516	1.12235	0.347213	0.47958	0.631526	0.89861
C14F11.4	C14F11.4	3.52327	7.38426	3.08445	13.7423	10.6249	5.23497	7.62529	3.82929	0.955415	3.31127	2.15422	4.43663	4.80258	4.9526	4.88713	0.932649	0	0.9772	1.02142	1.1323	0	4.28095	1.12835	1.04508		3.79444	1.08276	2.11808	0.659008	1.64302	0.10038	0.171464		3.79444	-0.330141	0.795459	0.820584	-0.402325	0.687445	NA		3.79444	-2.90737	0.133289	1.19697	-2.42894	0.0151432	0.216995
C14F11.5	hsp-43	242.225	210.041	225.936	264.539	249.685	225.976	605.258	623.217	562.74	231.789	457.772	461.41	559.021	581.436	493.6	541.869	465.347	550.164	655.752	467.64	571.171	464.483	450.213	568.523		447.075	0.126587	1.09171	0.19631	0.644835	0.519034	0.62987		447.075	-0.62822	0.646974	0.192236	-3.26797	0.00108322	0.0027951		447.075	-0.0690609	0.953258	0.190022	-0.363435	0.71628	0.929782
C14F11.6	rml-3	4949.31	3514.09	2092.03	1897.29	1917.79	1817.41	2252.32	2424.9	2293.95	1064.57	1621.05	1733.61	1938.32	1744.31	1529.67	2344.68	1662.69	1879.16	1952.96	1517.28	1790.61	1628.9	1774.9	1606.29		2039.5	-0.905971	0.533673	0.22342	-4.05501	5.01328e-05	0.000242325		2039.5	-0.656224	0.634537	0.224319	-2.92541	0.00344003	0.00737666		2039.5	0.175594	1.12943	0.223982	0.783965	0.433061	0.81136
C14F5.1	dct-1	2900.53	2622.23	2514.6	3704.4	3567.31	3854.68	3054.88	3167.78	2860.51	1736.76	2252.24	2319.25	3271.52	3310.32	2927.39	3392.98	3437.59	3470.04	3585.19	3447.85	3587.74	4067.97	4199.73	3976.53		3217.92	0.46938	1.38451	0.104967	4.4717	7.76008e-06	4.56342e-05		3217.92	-0.523301	0.695778	0.106211	-4.92699	8.35039e-07	6.02662e-06		3217.92	0.11532	1.08321	0.105134	1.09689	0.272691	0.698183
C14F5.3	tnt-3	2332.4	2441.73	3303.45	2541.46	2762.47	2782.39	7824.5	8760.46	7310.84	3206.97	5542.81	5996.11	3542.38	4015.57	3474.75	3248.42	3572.46	3086.98	7195.91	5763.4	6769.36	6504.9	6638.11	6534.88		4798.03	0.00140615	1.00098	0.181247	0.00775822	0.99381	0.998238		4798.03	-0.695642	0.617434	0.180769	-3.84824	0.000118968	0.000429089		4798.03	-0.155163	0.898031	0.181118	-0.856696	0.391613	0.786333
C14F5.4	sfxn-2	638.592	531.667	399.437	346.134	369.215	403.965	120.098	131.153	121.338	105.961	129.253	90.951	326.576	318.948	309.844	360.935	317.095	327.362	326.855	354.41	423.492	381.004	392.667	397.13		317.67	-0.486638	0.713686	0.158811	-3.06427	0.00218205	0.00680885		317.67	-0.188831	0.877317	0.189361	-0.997199	0.318668	0.381707		317.67	0.0740667	1.05268	0.163276	0.453629	0.650096	0.907891
C14H10.1	zipt-13	756.621	648.995	751.064	906.99	849.991	906.522	976.99	1129.64	1034.71	552.982	971.554	836.306	1124.76	1181.69	1106.45	1008.19	1042.91	1157.01	1863.07	1504.83	1640.76	1611.78	1488.3	1659.59		1112.99	0.304577	1.23506	0.152308	1.99974	0.0455279	0.0891974		1112.99	-0.406173	0.754622	0.153212	-2.65106	0.00802404	0.0152803		1112.99	-0.0892917	0.939984	0.151499	-0.589388	0.555601	0.870615
C14H10.2	C14H10.2	3272.23	3238.41	3496.23	3285.26	3569.96	3435.89	3481.9	3842.69	3273.25	1536.43	2299.63	2395.78	4157.11	4254.29	3942.94	4880.55	3840.14	3501.31	3103.08	2469.54	2878.66	2220.74	2200.29	2367.11		3205.98	0.0403677	1.02838	0.151494	0.266464	0.789882	0.854885		3205.98	-0.764058	0.588838	0.15237	-5.01448	5.31761e-07	4.04195e-06		3205.98	-0.015451	0.989347	0.151439	-0.102027	0.918735	0.985575
C14H10.3	C14H10.3	858.796	996.875	1158.98	1010.92	1126.24	1029.54	1603.22	1659.04	1467.52	645.698	1130.97	1082.54	1504.17	1797.79	1692.9	1335.55	1505.17	1451.14	2504.52	1924.91	1989.33	1423.41	1329.2	1487.15		1404.82	0.0705813	1.05014	0.170323	0.414397	0.678583	0.769861		1404.82	-0.721923	0.606289	0.170924	-4.22364	2.40389e-05	0.00010989		1404.82	-0.218896	0.859223	0.169557	-1.29098	0.196709	0.625166
C15A11.1	col-35	0.880817	0	5.39779	4.29446	1.77081	5.23497	3.81265	2.87197	1.91083	0	2.15422	1.10916	1.92103	0	0	0.932649	1.02953	0	0	0	1.08588	2.14047	0	0		1.5228	0.821666	1.76745	1.08329	0.758488	0.448159	NA		1.5228	-1.27002	0.414654	1.3057	-0.972674	0.330715	NA		1.5228	0.0101952	1.00709	1.68254	0.00605943	0.995165	1
C15A11.3	sol-1	138.288	184.607	226.707	200.981	185.935	180.606	235.431	232.629	230.255	144.04	199.265	153.064	288.155	249.611	278.567	253.681	234.732	267.753	323.79	212.872	236.721	222.609	147.814	199.61		217.822	0.0438185	1.03084	0.193609	0.226325	0.820949	0.877574		217.822	-0.485293	0.714352	0.198257	-2.4478	0.0143733	0.0253261		217.822	-0.110316	0.926385	0.190673	-0.578563	0.562884	0.874015
C15A7.2	C15A7.2	59.0147	59.8946	83.2802	65.2758	56.6661	60.2022	123.911	149.342	138.535	77.8149	95.8629	103.152	118.144	103.014	91.8781	101.659	84.4213	73.29	59.2424	32.8367	35.8339	33.1773	37.2357	50.1638		78.9103	-0.154073	0.898709	0.225691	-0.682675	0.494812	0.60749		78.9103	-0.561479	0.677607	0.216233	-2.59664	0.00941414	0.0175375		78.9103	-0.270188	0.829212	0.216468	-1.24816	0.211971	0.645638
C15B12.4	C15B12.4	6.16572	13.1276	4.62668	9.44781	10.6249	15.7049	14.2974	7.65858	13.3758	3.31127	9.694	8.87327	0	4.9526	4.88713	2.79795	3.08858	0.9772	8.17137	5.6615	4.34351	4.28095	6.77012	4.18032		6.95913	0.582836	1.49779	0.524169	1.11192	0.266171	0.375649		6.95913	-0.62851	0.646844	0.567772	-1.10698	0.268304	NA		6.95913	-0.513908	0.700323	0.810728	-0.633885	0.526156	0.856752
C15B12.5	gar-1	37.8751	38.5623	77.1113	42.9446	48.6974	60.2022	37.1733	44.0369	36.3058	18.212	43.0844	24.4015	62.4336	87.1658	87.9684	56.8916	53.5355	77.1988	123.592	78.1287	110.759	80.2677	82.3698	95.1023		62.6675	-0.0228611	0.984279	0.286765	-0.0797206	0.93646	0.96127		62.6675	-0.417588	0.748675	0.32522	-1.28402	0.199136	0.253307		62.6675	-0.339495	0.790318	0.280322	-1.21109	0.22586	0.659794
C15B12.6	actl-1	419.269	374.136	325.41	232.76	260.31	230.339	195.398	195.294	209.236	153.974	169.106	157.501	262.221	260.507	239.469	326.427	256.352	223.779	328.897	298.927	291.015	443.078	403.951	430.573		278.664	-0.628005	0.64707	0.14242	-4.40953	1.03598e-05	5.90546e-05		278.664	-0.316676	0.802918	0.158103	-2.00297	0.0451804	0.0684363		278.664	0.0829924	1.05921	0.146391	0.566924	0.570766	0.877214
C15B12.7	cdf-1	857.034	979.645	960.036	1246.25	1308.63	1211.9	1105.67	1062.63	1071.02	1498.35	1090.04	1159.07	611.849	613.132	579.614	644.461	588.89	555.05	1717.01	2511.44	2367.21	2399.47	2642.6	2212.43		1291.39	0.429363	1.34664	0.143513	2.9918	0.00277334	0.00833233		1291.39	0.207352	1.15457	0.14431	1.43685	0.150759	0.198302		1291.39	-0.0127883	0.991175	0.147535	-0.0866799	0.930926	0.991097
C15C6.1	C15C6.1	1784.53	1366.09	1637.84	1686.01	1608.78	1509.42	1850.09	1881.14	1857.33	905.633	1609.2	1319.9	2032.45	1716.57	1608.84	1507.16	1228.23	1512.71	6324.64	4855.3	4624.75	2753.72	2059.25	2878.15		2171.57	0.00481313	1.00334	0.185321	0.0259718	0.97928	0.988314		2171.57	-0.540868	0.687357	0.186162	-2.90535	0.00366837	0.00780771		2171.57	-0.334741	0.792927	0.185653	-1.80304	0.0713812	0.427497
C15C6.2	C15C6.2	7.92735	3.28189	9.25336	2.57668	6.19785	5.23497	0.953161	0	3.82166	11.5894	3.23133	4.43663	23.0524	36.6493	15.6388	13.0571	27.7973	46.9056	0	0	0	2.14047	0	0		9.32272	-0.551703	0.682214	0.667004	-0.827136	0.40816	0.524495		9.32272	1.91977	3.78363	0.88992	2.15724	0.0309869	0.0491332		9.32272	0.218993	1.16392	0.530737	0.412621	0.679884	0.918171
C15C6.4	popl-4	1062.26	835.242	404.063	312.637	284.216	293.158	186.82	188.593	176.752	440.399	254.198	240.687	3423.28	3743.18	3510.92	3167.28	3690.86	3232.58	167.513	225.328	210.66	236.522	326.094	250.819		1119.34	-1.37002	0.386886	0.250303	-5.47344	4.41379e-08	4.49784e-07		1119.34	0.752796	1.68506	0.257529	2.92315	0.00346512	0.00742377		1119.34	-0.0815499	0.945042	0.245476	-0.332211	0.73973	0.936099
C15C7.4	C15C7.4	82.7968	79.5859	100.245	139.141	123.957	117.787	82.925	93.8176	81.2103	72.848	109.865	88.7327	103.736	104.995	122.178	104.457	152.37	149.512	21.4498	23.7783	26.061	28.8964	15.797	28.2172		85.5983	0.534621	1.44856	0.19881	2.6891	0.00716439	0.0189463		85.5983	0.0899815	1.06436	0.213307	0.421841	0.673141	0.726196		85.5983	0.294139	1.22615	0.198513	1.48172	0.138415	0.557113
C15C7.5	bbln-1	2489.19	2102.05	1894.63	2980.36	3354.81	3038.9	2227.54	2340.65	2395.23	1645.7	1820.32	1841.2	3246.55	2938.87	2861.9	4291.12	3332.58	3458.31	1439.18	1030.39	1069.59	1317.46	1321.3	1501.78		2330.82	0.531594	1.44552	0.141168	3.76567	0.000166104	0.000698894		2330.82	-0.391124	0.762535	0.142326	-2.74808	0.00599462	0.0118744		2330.82	0.292751	1.22497	0.140993	2.07636	0.037861	0.325313
C15C7.7	pfut-1	546.106	521.821	411.775	389.937	375.413	410.945	698.667	671.083	648.727	490.068	603.182	583.417	1547.39	1384.75	1245.24	1819.6	1447.52	1409.12	509.689	380.453	459.326	423.814	471.652	508.954		748.277	-0.330144	0.795457	0.151502	-2.17915	0.0293208	0.0616673		748.277	-0.264195	0.832663	0.151035	-1.74923	0.0802518	0.114109		748.277	0.162932	1.11956	0.145507	1.11976	0.262816	0.692357
C15C8.1	xbx-9	93.3666	86.9702	102.558	121.104	109.79	115.169	78.1592	106.263	89.809	57.9472	91.5544	76.5319	185.38	162.445	191.576	151.089	155.459	177.85	46.9854	39.6305	42.3492	44.9499	28.2088	48.0737		100.134	0.289972	1.22262	0.183385	1.58122	0.113827	0.189856		100.134	-0.255085	0.837937	0.202355	-1.26059	0.207458	0.262491		100.134	-0.155517	0.897811	0.174088	-0.893327	0.371682	0.774712
C15C8.2	cky-1	283.623	312.6	493.513	880.364	852.647	781.756	632.899	777.346	605.733	319.538	542.864	532.396	866.386	1054.9	916.826	885.084	973.933	918.568	972.393	702.026	858.929	644.282	538.225	612.417		706.635	1.20509	2.30552	0.201913	5.96837	2.39633e-09	3.24114e-08		706.635	-0.525544	0.694697	0.203364	-2.58425	0.00975904	0.0180737		706.635	-0.0311348	0.97865	0.199812	-0.155821	0.876174	0.977435
C15C8.4	C15C8.4	1513.24	1327.53	910.685	980.855	1086.39	1094.11	986.522	862.548	976.434	2069.54	1221.44	1407.52	1115.16	981.606	1001.86	1817.73	1513.41	1353.42	340.133	458.581	415.891	478.396	672.499	462.97		1043.69	-0.24659	0.842886	0.204012	-1.2087	0.226778	0.33072		1043.69	0.731828	1.66074	0.204599	3.5769	0.000347695	0.00106622		1043.69	0.596346	1.51188	0.204158	2.921	0.00348906	0.0903464
C15F1.1	C15F1.1	262.483	227.271	215.141	365.888	332.028	314.098	207.789	211.568	224.523	62.9141	168.029	147.518	193.064	181.265	154.433	214.509	131.78	172.964	435.125	277.413	349.652	266.489	201.975	257.09		232.292	0.522398	1.43634	0.229553	2.27572	0.0228626	0.0501549		232.292	-0.743781	0.597172	0.241708	-3.07719	0.00208964	0.00482563		232.292	-0.0246833	0.983036	0.237131	-0.104091	0.917097	0.984963
C15F1.2	C15F1.2	46.6833	52.5103	30.8445	35.2146	53.1244	38.3898	20.0164	6.70126	10.5096	16.5564	6.46266	15.5282	19.2103	18.8199	21.5034	20.5183	25.7382	19.544	43.9211	22.646	46.6927	42.8095	48.5192	55.3892		29.9105	-0.0349669	0.976054	0.307947	-0.113549	0.909596	0.943721		29.9105	0.00783185	1.00544	0.435843	0.0179694	0.985663	0.988153		29.9105	0.141577	1.10311	0.363924	0.389029	0.697254	0.923384
C15F1.5	C15F1.5	97.7706	68.0993	42.4112	33.4968	23.906	20.9399	9.53161	6.70126	9.55415	29.8014	14.0024	19.9649	4090.84	4101.75	4047.52	3489.04	4169.59	3692.84	6.12852	11.323	15.2023	5.35118	6.77012	6.27048		1000.78	-1.40225	0.378337	0.274523	-5.10797	3.25637e-07	2.72182e-06		1000.78	1.25221	2.38207	0.404094	3.09882	0.00194291	0.00454703		1000.78	-0.108772	0.927377	0.210452	-0.516852	0.60526	0.889286
C15F1.6	art-1	4405.84	3820.12	3499.31	4832.99	5223.9	4846.71	4974.55	4949.36	5192.68	12644.1	7283.42	6314.44	3843.99	4377.11	4262.56	3868.63	4689.5	4858.64	2738.43	3283.67	2977.47	3020.21	3452.76	3058.95		4684.14	0.346098	1.27112	0.184892	1.87189	0.0612216	0.114142		4684.14	0.795186	1.7353	0.184798	4.30301	1.68494e-05	8.17643e-05		4684.14	0.103969	1.07473	0.185018	0.561938	0.574158	0.877514
C15H11.10	C15H11.10	0	0	0	0	0	0	0	0	0	1.65564	0	0	0	0	0	0	0	0	0	0	0	0	0	0		0.0689848	0	1	6.00631	0	1	NA		0.0689848	1.35561	2.55905	6.00582	0.225715	0.821423	NA		0.0689848	0	1	6.00631	0	1	1
C15H11.11	C15H11.11	65.1804	46.767	33.1579	34.3557	32.7601	23.5574	36.2201	43.0795	34.3949	29.8014	39.8531	31.0564	22.0919	18.8199	11.7291	31.7101	21.6201	30.2932	8.17137	7.9261	8.68702	10.7024	13.5402	14.6311		27.0878	-0.671607	0.627807	0.291995	-2.30007	0.0214444	0.0476478		27.0878	-0.163055	0.893132	0.310799	-0.524631	0.599839	0.657945		27.0878	0.670859	1.59202	0.340942	1.96766	0.0491069	0.3579
C15H11.2	gnrr-2	307.405	299.473	389.412	566.01	534.786	502.557	11.4379	11.4879	12.4204	21.5233	17.2338	11.0916	174.814	142.635	118.269	195.856	199.728	178.828	24.5141	19.2491	23.8893	14.9833	12.4119	22.9918		158.875	0.685602	1.60837	0.170019	4.03251	5.51852e-05	0.000264002		158.875	0.452486	1.3684	0.368376	1.22833	0.219325	0.275153		158.875	0.398088	1.31776	0.185107	2.15058	0.031509	0.298792
C15H11.3	nxf-1	1853.24	2520.49	3688.23	3869.31	3927.67	3784.01	5359.63	5038.39	5332.17	8960.3	5913.34	6455.3	3262.87	3469.79	3215.73	2555.46	3234.78	2926.71	4828.26	6948.92	5481.51	6604.43	6925.84	6209.86		4681.93	0.522314	1.43626	0.196243	2.66157	0.00777771	0.0202798		4681.93	0.438915	1.35558	0.195942	2.24003	0.0250892	0.0410212		4681.93	-0.190704	0.876178	0.196418	-0.970908	0.331594	0.743666
C15H11.4	dhs-22	3856.21	2755.15	1798.24	1669.69	1610.56	1619.35	961.74	840.529	1052.87	3625.84	1743.84	1742.49	755.926	650.772	740.889	997.002	869.951	820.848	678.223	706.555	698.219	821.942	965.871	833.974		1367.36	-0.779204	0.582688	0.239804	-3.24934	0.00115673	0.00389717		1367.36	1.31527	2.4885	0.240837	5.46125	4.72789e-08	4.97012e-07		1367.36	0.323759	1.25159	0.242149	1.33703	0.181214	0.611327
C15H11.9	rrbs-1	3586.68	2523.78	1942.43	1406.01	1560.09	1579.22	1354.44	1382.37	1316.56	2084.45	1384.09	1655.97	1950.81	1740.34	1546.29	2327.89	1797.56	1791.21	906	883.194	965.345	1102.34	1278.42	1119.28		1632.7	-0.824898	0.564522	0.184881	-4.46178	8.12812e-06	4.75729e-05		1632.7	0.336865	1.26301	0.185954	1.81155	0.0700565	0.101081		1632.7	0.176022	1.12976	0.185205	0.950416	0.341901	0.751759
C15H9.1	nnt-1	316.213	358.547	296.879	688.831	608.275	708.466	899.784	967.853	861.784	433.776	733.512	601.164	362.115	389.275	404.655	488.708	469.465	531.597	353.412	377.056	361.597	568.296	599.156	560.163		539.191	1.04585	2.06458	0.147586	7.08634	1.37709e-12	3.80824e-11		539.191	-0.618512	0.651342	0.146051	-4.2349	2.28651e-05	0.000105469		539.191	0.366113	1.28888	0.149123	2.4551	0.0140844	0.209117
C15H9.3	C15H9.3	11.4506	6.56379	8.48225	12.0245	14.1665	11.3424	0.953161	0	0.955415	0	1.07711	0	1.92103	1.98104	3.90971	1.8653	1.02953	6.8404	1.02142	5.6615	6.51526	2.14047	3.38506	3.13524		4.43424	0.506446	1.42055	0.559311	0.905481	0.365211	0.482473		4.43424	-0.501784	0.706233	1.62108	-0.309537	0.756913	NA		4.43424	0.323022	1.25095	0.81747	0.395148	0.692734	0.922781
C15H9.4	C15H9.4	1032.32	1102.72	1138.16	1258.28	1361.76	1329.68	1322.99	1302.92	1302.23	2026.5	1434.71	1626.03	860.623	786.473	860.135	761.042	788.618	790.555	837.565	793.742	939.284	851.908	992.951	838.154		1097.47	0.270785	1.20646	0.120164	2.25346	0.0242303	0.0526736		1097.47	0.370032	1.29238	0.120356	3.07448	0.00210871	0.00486337		1097.47	-0.099615	0.933282	0.123035	-0.80965	0.418141	0.80135
C15H9.5	C15H9.5	658.851	767.143	778.824	944.781	888.949	913.502	597.632	587.796	563.695	526.492	582.717	553.47	885.596	993.492	827.88	965.292	943.048	926.386	1067.38	1119.84	1144.51	1094.85	1234.42	1116.15		861.779	0.316575	1.24537	0.1012	3.1282	0.00175879	0.00564436		861.779	-0.0703256	0.952423	0.107343	-0.655146	0.512374	0.57444		861.779	0.066722	1.04733	0.101357	0.658285	0.510355	0.852314
C15H9.7	kynu-1	970.66	881.189	587.588	590.059	579.942	506.92	518.52	543.759	502.548	283.114	408.225	420.371	800.11	770.625	652.921	982.08	930.693	835.506	564.846	790.345	752.513	780.202	863.191	743.052		677.457	-0.540073	0.687736	0.180006	-3.0003	0.00269715	0.00812971		677.457	-0.486668	0.713671	0.185095	-2.62929	0.00855632	0.0161519		677.457	0.305626	1.23595	0.179644	1.70129	0.0888888	0.468415
C16A11.8	clec-135	0	4.10237	3.08445	0	5.31244	0.872495	0	0	0	0	0	0	0	0	0	0.932649	0	0.9772	1886.56	1901.13	2305.32	2289.24	1738.79	2069.26		508.566	-0.272936	0.827634	0.750333	-0.363753	0.716043	0.799076		508.566	0	1	1.67608	0	1	1		508.566	1.86032	3.63088	1.56933	1.18542	0.235851	0.667576
C16A3.1	smrc-1	543.464	750.733	656.217	511.041	540.098	550.544	636.712	596.412	666.88	1958.62	1040.49	1126.91	723.269	756.758	775.099	658.45	702.138	557.981	416.74	779.022	589.631	735.253	884.629	680.347		743.226	-0.284436	0.821063	0.217684	-1.30665	0.191332	0.287656		743.226	1.11626	2.16784	0.216948	5.14528	2.67129e-07	2.21163e-06		743.226	-0.233246	0.850719	0.217571	-1.07205	0.2837	0.705603
C16A3.10	oatr-1	1407.54	1320.96	982.398	1386.25	1366.18	1402.1	1422.12	1425.45	1515.29	4053	2226.39	2218.32	1287.09	1249.05	1345.92	1887.68	2261.87	1872.32	1924.36	1649.76	1582.12	1245.76	1176.87	1158.99		1640.32	0.163207	1.11977	0.185856	0.878135	0.379871	0.497598		1640.32	0.960134	1.94549	0.185507	5.17574	2.27013e-07	1.91953e-06		1640.32	0.633296	1.5511	0.185756	3.40929	0.000651322	0.0279185
C16A3.3	let-716	1876.14	2370.35	2394.31	1570.05	1800.92	1854.05	2078.85	2340.65	2113.38	1758.28	1707.22	1915.52	2826.8	2842.79	2382.97	2331.62	2392.62	2178.18	1538.26	1699.58	1922	1732.71	1911.43	1614.65		2048.06	-0.346209	0.786648	0.126814	-2.73005	0.00633239	0.0171235		2048.06	-0.279628	0.823803	0.127571	-2.19194	0.0283842	0.0456152		2048.06	-0.222373	0.857154	0.126585	-1.7567	0.0789683	0.44678
C16A3.4	znf-622	3204.41	2571.36	1613.17	1791.65	1816.86	1774.66	1375.41	1244.52	1388.22	3425.51	2043.28	2048.62	1815.38	1669.03	1581.48	2372.66	2024.05	2073.62	1209.36	1548.99	1421.41	1613.92	1936.26	1674.22		1884.92	-0.456691	0.728656	0.205731	-2.21984	0.0264296	0.0567089		1884.92	0.906002	1.87385	0.206414	4.38925	1.13741e-05	5.82564e-05		1884.92	0.35307	1.27728	0.206088	1.7132	0.0866756	0.465069
C16A3.7	nfx-1	1615.42	1709.87	1761.22	1366.5	1501.65	1432.64	3082.52	2647.95	3103.19	11854.3	5595.59	6232.36	6872.49	6486.92	7082.43	8469.39	6805.18	6909.78	1425.9	1812.81	1621.21	1974.59	2031.04	2079.71		3978.11	-0.242139	0.845491	0.196347	-1.23322	0.217493	0.319875		3978.11	1.42209	2.67974	0.19527	7.2827	3.27199e-13	2.31469e-11		3978.11	0.11804	1.08526	0.194895	0.60566	0.54474	0.865447
C16A3.8	thoc-2	2559.65	2943.86	2798.37	1877.54	2109.93	2128.89	2407.69	2512.02	2442.04	4476.84	2889.89	3199.92	2444.51	2455.5	2689.88	2295.25	2325.7	1982.74	1127.65	1806.02	1610.36	1833.32	1887.74	1647.05		2352.18	-0.440832	0.73671	0.163536	-2.69563	0.00702555	0.0186387		2352.18	0.520311	1.43426	0.163593	3.18052	0.00147013	0.00360594		2352.18	-0.200816	0.870058	0.163759	-1.22629	0.220088	0.653948
C16A3.9	rps-13	12951.5	9940.04	6673.21	4043.66	4210.11	3777.9	6624.47	6925.27	6926.76	4581.14	5253.07	5506.97	5176.22	4717.85	4165.79	4819	5385.46	5859.29	6063.15	5155.36	5957.12	4432.92	4990.71	4614.03		5781.29	-1.29696	0.406982	0.17073	-7.59658	3.04062e-14	1.15404e-12		5781.29	-0.416303	0.749343	0.170911	-2.43579	0.0148594	0.0260797		5781.29	0.192198	1.1425	0.170913	1.12454	0.260786	0.690378
C16B8.1	lin-18	205.23	234.655	315.385	346.134	347.08	335.038	394.609	418.35	330.574	254.968	354.369	289.49	405.338	468.516	409.542	414.096	442.697	495.441	547.482	360.071	425.664	394.917	308.041	400.266		370.748	0.443285	1.3597	0.183042	2.42177	0.0154452	0.0361994		370.748	-0.342026	0.788933	0.184781	-1.85098	0.0641726	0.0935168		370.748	0.0753569	1.05362	0.180451	0.417603	0.676238	0.916486
C16B8.4	C16B8.4	571.65	598.125	611.493	684.537	764.106	665.714	1012.26	1053.06	857.007	695.367	753.977	1006.01	772.255	726.052	621.643	962.494	896.719	926.386	682.309	825.446	844.812	715.988	862.062	760.818		786.262	0.24705	1.18678	0.144956	1.70431	0.0883224	0.154486		786.262	-0.248204	0.841944	0.144741	-1.71481	0.0863792	0.12154		786.262	0.394022	1.31405	0.144503	2.72674	0.00639638	0.131744
C16C10.10	glod-4	1457.75	1114.2	544.406	262.821	272.705	314.098	142.021	106.263	120.382	710.268	296.205	315.001	207.472	194.142	196.463	415.029	349.01	319.544	239.012	257.032	272.555	214.047	322.709	249.774		370.538	-1.87461	0.272701	0.290175	-6.46025	1.04527e-10	1.90582e-09		370.538	1.83562	3.56924	0.29821	6.15546	7.48609e-10	1.43753e-08		370.538	0.857552	1.81196	0.294606	2.91084	0.00360459	0.092081
C16C10.11	har-1	2697.06	2692.79	2530.02	2495.08	2935.12	2784.13	1676.61	1829.44	1822.93	2175.5	1534.88	1787.96	2148.68	2204.9	2161.09	1966.96	2219.66	2177.2	2476.95	2789.99	2641.94	2153.32	2484.63	2153.91		2272.53	0.0526899	1.0372	0.118336	0.445258	0.656133	0.752424		2272.53	0.0424697	1.02988	0.120096	0.353631	0.723616	0.770068		2272.53	-0.0339147	0.976766	0.119155	-0.284626	0.775931	0.951013
C16C10.13	C16C10.13	45.8025	41.0237	16.9645	12.8834	11.5103	9.59745	22.8759	19.1465	25.7962	51.3247	33.3904	35.4931	7.68413	4.9526	9.77426	8.39384	11.3248	5.8632	3.06426	3.3969	5.42939	5.35118	6.77012	4.18032		16.7497	-1.6028	0.329238	0.398403	-4.02306	5.74467e-05	0.00027289		16.7497	0.80646	1.74891	0.37446	2.15366	0.0312669	0.0494909		16.7497	0.183817	1.13589	0.509142	0.361033	0.718075	0.930777
C16C10.2	C16C10.2	1651.53	1285.68	693.231	327.238	345.309	327.186	570.944	566.735	591.402	711.923	573.023	646.639	573.428	462.573	434.955	640.73	479.76	511.076	270.677	391.776	393.087	424.884	531.455	449.384		577.276	-1.86008	0.275462	0.224613	-8.28126	1.21876e-16	8.51557e-15		577.276	0.15854	1.11616	0.225144	0.704169	0.481328	0.545281		577.276	0.149748	1.10938	0.225373	0.664446	0.506405	0.84946
C16C10.4	C16C10.4	9229.2	6220.01	3245.62	1897.29	1905.4	1886.33	2300.93	2152.06	2367.52	7458.64	3816.2	3733.43	1652.09	1486.77	1515.01	2540.54	2017.87	1958.31	1290.05	2100.42	1775.41	1723.08	2155.16	1718.11		2839.39	-1.71631	0.304326	0.27502	-6.24067	4.35707e-10	7.0769e-09		2839.39	1.13732	2.19972	0.275126	4.1338	3.56812e-05	0.000154604		2839.39	0.485751	1.40031	0.275635	1.7623	0.0780191	0.443587
C16C10.5	rnf-121	1367.03	1120.77	852.851	686.255	698.586	761.688	694.855	698.846	694.587	1721.86	998.482	932.802	1260.2	1201.5	1064.42	1283.33	1388.83	1347.56	950.943	1058.7	993.578	1032.78	1271.65	1053.44		1047.31	-0.637706	0.642734	0.190458	-3.34828	0.000813158	0.00286822		1047.31	0.803332	1.74513	0.191304	4.19925	2.67801e-05	0.000120874		1047.31	0.188947	1.13993	0.189732	0.99586	0.319318	0.734745
C16C10.6	ccdc-55	4609.31	3131.75	2473.73	1607.85	1583.11	1636.8	1172.39	1137.3	1207.64	2688.75	1610.28	1836.77	986.45	887.506	941.262	1049.23	962.609	929.317	865.143	1241	970.774	1287.49	1413.83	1207.07		1559.89	-1.08106	0.472683	0.196684	-5.49641	3.87593e-08	3.99349e-07		1559.89	0.801276	1.74264	0.197839	4.05014	5.11871e-05	0.000209709		1559.89	0.0631786	1.04477	0.198886	0.317663	0.750741	0.939896
C16C2.2	eat-16	1421.64	1635.2	2265.53	2956.31	2921.84	2922.86	5387.27	5675.97	5154.46	3718.56	4669.27	4779.36	1694.35	1895.86	1790.65	1776.7	1675.04	1730.62	2835.46	2466.15	2741.84	2598.53	2634.71	2610.61		2914.95	0.725113	1.65303	0.140099	5.1757	2.27059e-07	1.97786e-06		2914.95	-0.299956	0.812277	0.139371	-2.15222	0.03138	0.0496589		2914.95	-0.0541384	0.963169	0.140963	-0.384062	0.700932	0.924865
C16C2.3	ocrl-1	854.392	981.286	923.794	953.37	927.907	891.69	1008.44	1047.31	1043.31	990.07	819.681	970.514	906.727	1020.24	1038.03	926.121	956.431	928.34	1345.21	1482.18	1576.69	1604.28	1593.24	1450.57		1093.33	0.00676123	1.0047	0.103797	0.0651388	0.948063	0.967972		1093.33	-0.159152	0.895551	0.105324	-1.51107	0.130769	0.175201		1093.33	-0.0769902	0.948033	0.104444	-0.737142	0.461036	0.827901
C16C2.4	C16C2.4	2746.39	2310.45	1850.67	1078.77	1018.22	1052.23	1369.69	1209.1	1433.12	6362.61	2738.02	2691.93	1034.48	1035.09	1067.35	1246.02	1244.7	1060.26	672.095	687.306	618.95	755.587	855.292	785.9		1538.51	-1.13304	0.455953	0.228015	-4.96917	6.72414e-07	5.24328e-06		1538.51	1.55437	2.93705	0.227789	6.82372	8.87141e-12	3.58114e-10		1538.51	0.178866	1.13199	0.228884	0.781469	0.434527	0.812261
C16C8.18	C16C8.18	1.76163	5.74331	1.54223	1.71778	5.31244	4.36248	1.90632	1.91465	2.86625	4.96691	2.15422	1.10916	0.960516	0	0.977426	1.8653	6.17717	2.9316	2.04284	4.5292	1.08588	5.35118	5.64177	4.18032		2.96252	0.329142	1.25627	0.790387	0.416431	0.677095	0.768699		2.96252	0.185997	1.1376	0.955806	0.194597	0.845708	NA		2.96252	2.4759	5.56314	1.22678	2.01821	0.0435693	0.347519
C16D6.2	npr-4	45.8025	49.2284	74.798	79.877	67.2909	66.3096	51.4707	61.2687	65.9236	36.424	44.1615	25.5106	110.459	104.005	104.585	91.3996	77.2146	77.1988	103.163	57.7473	89.0419	104.883	71.0863	86.7416		72.733	0.324894	1.25257	0.238604	1.36164	0.17331	0.26588		72.733	-0.753001	0.593368	0.272187	-2.76648	0.00566647	0.0112966		72.733	-0.375118	0.771042	0.230285	-1.62893	0.103328	0.496963
C16D9.1	C16D9.1	51.9682	58.2536	60.918	128.834	117.759	109.934	31.4543	26.805	32.4841	26.4902	26.9278	28.8381	120.065	83.2037	130.975	256.479	210.024	229.642	160.363	122.288	97.7289	193.713	101.552	243.504		110.425	1.05755	2.0814	0.259943	4.06839	4.73382e-05	0.000230313		110.425	-0.138362	0.90855	0.32558	-0.424971	0.670858	0.724138		110.425	1.05853	2.08282	0.247948	4.26918	1.96195e-05	0.00162607
C16D9.6	C16D9.6	341.757	315.062	218.225	275.704	274.476	316.716	447.986	426.009	524.523	6723.54	2772.48	2260.47	161.367	167.398	155.411	212.644	166.784	186.645	263.527	184.565	203.059	146.622	116.22	159.897		709.212	-0.0128236	0.991151	0.27907	-0.0459511	0.963349	0.976609		709.212	3.07057	8.40102	0.274725	11.1769	5.29171e-29	9.45232e-26		709.212	0.225994	1.16958	0.285696	0.791029	0.428927	0.809118
C16D9.8	C16D9.8	1.76163	0.820473	2.31334	7.73003	1.77081	1.74499	0.953161	1.91465	1.91083	3.31127	3.23133	1.10916	0	0	0.977426	0	1.02953	3.9088	6.12852	1.1323	0	4.28095	3.38506	6.27048		2.3202	1.19876	2.29543	1.00036	1.19834	0.230786	NA		2.3202	0.648459	1.56749	1.12037	0.578791	0.56273	NA		2.3202	2.22655	4.68012	1.51457	1.47009	0.141538	0.560172
C16E9.1	C16E9.1	5.2849	8.20473	10.0245	14.6012	5.31244	6.97996	1.90632	0.957323	2.86625	8.27818	5.38555	3.32748	13.4472	8.91468	3.90971	8.39384	13.3839	12.7036	66.3924	61.1442	54.2939	78.1273	62.0595	78.381		22.2617	0.185483	1.1372	0.449844	0.412328	0.680099	0.770993		22.2617	1.49537	2.81937	0.754666	1.9815	0.0475352	0.0715933		22.2617	0.382518	1.30362	0.446645	0.856426	0.391762	0.786333
C16E9.2	C16E9.2	921.334	890.214	846.682	932.757	915.511	929.207	506.129	510.253	512.103	826.162	630.11	635.548	614.73	619.075	644.124	561.455	591.979	543.323	1055.13	1226.28	1205.32	1353.85	1363.05	1318.89		839.717	0.0636384	1.0451	0.104973	0.606234	0.54436	0.653249		839.717	0.444722	1.36105	0.110867	4.0113	6.03849e-05	0.000242116		839.717	-0.146616	0.903367	0.109563	-1.33819	0.180835	0.611327
C16H3.1	ncs-7	16.7355	20.5118	33.1579	33.4968	20.3644	34.0273	16.2037	13.4025	14.3312	8.27818	6.46266	12.2007	49.9469	42.5924	38.1196	37.306	35.004	31.2704	42.8997	18.1168	39.0916	41.7392	28.2088	42.8483		28.1798	0.311699	1.24117	0.328025	0.950228	0.341997	0.457986		28.1798	-0.698086	0.616389	0.451181	-1.54724	0.121805	0.164392		28.1798	-0.334952	0.792811	0.313057	-1.06994	0.284647	0.706218
C16H3.2	lec-9	2374.68	1902.68	1966.34	2136.06	2021.38	1918.62	1924.43	1992.19	1965.29	1048.02	1757.84	1327.66	3561.59	2767.51	3276.33	3356.6	2292.76	2928.67	10025.2	6634.14	6928.98	9216.88	6796.07	9605.33		3738.56	-0.039164	0.973219	0.197053	-0.198748	0.84246	0.893743		3738.56	-0.507212	0.703581	0.198085	-2.56058	0.0104498	0.0191889		3738.56	-0.163116	0.893094	0.196738	-0.829105	0.407045	0.795377
C16H3.3	C16H3.3	2432.82	2519.67	3077.51	3974.09	4263.24	4355.5	3854.58	4201.69	3710.83	2966.9	3454.29	3544.87	2843.13	2951.75	2543.26	2521.88	2584.12	2071.66	1536.22	1744.87	2008.87	1786.22	1853.89	1852.93		2860.62	0.648927	1.568	0.128656	5.0439	4.56149e-07	3.69237e-06		2860.62	-0.23895	0.847362	0.128959	-1.8529	0.0638961	0.093171		2860.62	-0.216235	0.860809	0.129315	-1.67216	0.0944931	0.480784
C17C3.1	C17C3.1	381.394	297.011	215.141	400.244	335.569	438.865	324.075	291.983	277.07	302.981	291.897	249.561	472.574	444.744	413.451	310.572	286.209	282.411	399.376	461.978	520.135	221.539	268.548	199.61		336.956	0.396892	1.31667	0.178851	2.21912	0.0264783	0.0567971		336.956	-0.0835737	0.943717	0.184079	-0.454011	0.649821	0.704548		336.956	-0.597794	0.660763	0.179904	-3.32284	0.000891049	0.0352104
C17C3.4	ins-11	0	3.28189	0.771113	5.15335	0	6.10747	0.953161	0.957323	0.955415	0	1.07711	0	60.5125	38.6303	31.2776	45.6998	48.3878	43.974	3.06426	1.1323	2.17175	2.14047	2.25671	4.18032		12.6119	1.4639	2.75853	0.831937	1.75963	0.0784705	0.140053		12.6119	-1.08688	0.470779	1.48191	-0.733432	0.463295	0.527949		12.6119	0.0809906	1.05774	0.380856	0.212654	0.831597	0.966843
C17D12.1	dhhc-7	894.029	895.957	1001.68	1194.72	1282.95	1270.35	1088.51	963.067	992.676	2925.51	1502.57	1527.31	566.705	612.142	579.614	549.33	648.603	643.975	1581.16	2434.44	1852.51	1957.46	2349.23	2007.6		1305.09	0.424886	1.34247	0.200797	2.116	0.0343451	0.0702469		1305.09	0.96587	1.95324	0.200802	4.81005	1.50892e-06	1.01232e-05		1305.09	0.0667189	1.04733	0.203675	0.327576	0.743232	0.937941
C17D12.2	unc-75	177.044	334.753	626.915	579.752	564.004	587.189	2183.69	2304.28	2159.24	971.858	1572.58	1472.96	1438.85	1605.63	1423.13	1178.87	1434.13	1445.28	746.659	570.679	604.834	461.272	412.977	490.142		1056.11	0.602586	1.51844	0.266795	2.25861	0.0239078	0.0520487		1056.11	-0.725382	0.604837	0.263795	-2.74979	0.00596328	0.0118223		1056.11	-0.138691	0.908343	0.263787	-0.525768	0.59905	0.885963
C17D12.5	C17D12.5	3.52327	2.46142	3.85557	0.858892	1.77081	3.48998	3.81265	0.957323	2.86625	0	0	0	0	0.990521	1.95485	0.932649	6.17717	5.8632	14.2999	11.323	19.5458	7.49166	7.89848	8.36064		4.51808	-0.689653	0.620003	0.813692	-0.847559	0.396683	0.514188		4.51808	-3.46339	0.09066	1.35607	-2.55399	0.0106496	NA		4.51808	2.12864	4.37305	1.02149	2.08386	0.0371733	0.32317
C17D12.6	spe-9	3.52327	6.56379	16.1934	3.43557	4.42704	7.85246	1.90632	0.957323	0.955415	3.31127	0	1.10916	0.960516	1.98104	0	0.932649	3.08858	3.9088	1.02142	1.1323	1.08588	3.21071	3.38506	4.18032		3.13009	-0.755687	0.592264	0.703712	-1.07386	0.282886	0.394156		3.13009	-0.00113908	0.999211	1.22952	-0.000926445	0.999261	NA		3.13009	1.42445	2.68412	1.12572	1.26537	0.20574	0.637643
C17E4.11	C17E4.11	488.853	383.161	187.381	138.282	150.519	152.687	233.525	243.16	266.561	354.306	302.668	253.997	3000.65	2740.77	2614.62	3385.52	3442.74	3202.29	63.3281	89.4516	96.6431	100.602	109.45	99.2826		920.852	-1.26115	0.417212	0.230162	-5.4794	4.26777e-08	4.36098e-07		920.852	0.289847	1.22251	0.229862	1.26096	0.207323	0.262366		920.852	0.263497	1.20038	0.218375	1.20662	0.227577	0.661124
C17E4.3	2003-03-01	1625.11	1456.34	966.205	839.138	841.137	880.348	858.798	714.163	970.702	6448.7	2559.22	2229.41	1313.99	1188.62	2082.9	1274	1935.51	1500.98	594.467	1096.07	635.238	766.289	953.459	796.351		1438.63	-0.660457	0.632678	0.312141	-2.11589	0.0343539	0.0702469		1438.63	2.14257	4.41548	0.311958	6.86813	6.50499e-12	2.79989e-10		1438.63	0.0387038	1.02719	0.311729	0.124158	0.90119	0.982817
C17E4.6	C17E4.6	2498.88	2608.29	2496.09	2400.6	2925.38	2749.23	1758.58	1525.97	1734.08	4769.89	2351.33	2818.37	2402.25	2443.61	2736.79	2483.64	2764.28	2631.6	337.069	666.924	506.019	612.175	932.02	648.994		2075.09	0.0868714	1.06206	0.226179	0.384083	0.700917	0.787156		2075.09	0.984909	1.97919	0.226651	4.34548	1.3897e-05	6.9002e-05		2075.09	0.0553816	1.03913	0.226347	0.244675	0.806708	0.960228
C17E7.4	C17E7.4	2349.14	1876.42	1322.46	1273.74	1270.56	1193.57	1266.75	1018.59	1328.03	10367.6	3861.44	3799.98	861.583	862.743	1307.8	1037.11	1155.13	935.181	2365.61	4891.53	3067.6	4006.97	4390.42	3718.39		2480.35	-0.569637	0.673786	0.303447	-1.87722	0.0604876	0.113085		2480.35	2.3184	4.9878	0.303287	7.64426	2.10158e-14	2.39324e-12		2480.35	0.0446066	1.0314	0.304314	0.146581	0.883463	0.979283
C17E7.5	nhr-157	12.3314	13.948	22.3623	29.2023	16.8227	27.0473	21.9227	23.9331	29.6179	9.93381	26.9278	11.0916	6.72361	4.9526	4.88713	11.1918	1.02953	1.9544	57.1996	36.2336	28.2328	53.5118	16.9253	37.6229		21.0669	0.581757	1.49667	0.453024	1.28416	0.199085	0.29715		21.0669	-0.619685	0.650813	0.47434	-1.30642	0.191411	0.244613		21.0669	-0.193285	0.874612	0.638996	-0.302483	0.762284	0.944651
C17G1.2	C17G1.2	0	0	0	0	3.54163	3.48998	3.81265	5.74394	4.77708	3.31127	3.23133	4.43663	1.92103	0	1.95485	0	2.05906	1.9544	3.06426	0	4.34351	37.4583	16.9253	33.4426		5.64449	3.94481	15.3994	1.36362	2.8929	0.00381703	0.0110225		5.64449	-0.373428	0.771946	0.765131	-0.488058	0.625509	NA		5.64449	0.0113596	1.0079	1.11869	0.0101544	0.991898	1
C17G1.4	nra-3	2220.54	3143.23	4611.26	5478.87	5487.75	5302.15	5768.53	6190.05	5640.77	5458.63	4738.21	6132.54	9596.52	10348	8849.62	9375.92	9650.8	6529.65	3944.73	4810.01	5846.36	5262.35	5170.12	4781.24		6014.08	0.705523	1.63074	0.203219	3.47174	0.000517104	0.00191953		6014.08	-0.108069	0.927829	0.203201	-0.531835	0.59484	0.653364		6014.08	-0.172094	0.887554	0.202891	-0.848207	0.396323	0.789148
C17G1.6	nas-37	2.64245	4.92284	3.85557	3.43557	6.19785	1.74499	14.2974	13.4025	14.3312	24.8345	21.5422	18.8557	8.64465	2.97156	2.93228	1.8653	2.05906	3.9088	15.3213	16.9845	26.061	10.7024	16.9253	14.6311		10.5446	-0.0176886	0.987814	0.628412	-0.028148	0.977544	0.987224		10.5446	0.620728	1.53765	0.416716	1.48957	0.136337	0.182046		10.5446	-0.901236	0.535428	0.696468	-1.29401	0.195663	0.624379
C17G1.7	cysl-1	2768.41	2395.78	2511.52	2485.63	2468.51	2594.8	1570.81	1536.5	1569.75	1048.02	1565.04	1360.94	1476.31	1698.74	1624.48	1885.82	1707.99	2027.69	2377.87	2255.54	2429.11	2080.54	2242.04	2245.88		1996.99	-0.0239182	0.983558	0.121321	-0.197149	0.843711	0.894579		1996.99	-0.231198	0.851927	0.12388	-1.8663	0.0619995	0.0907388		1996.99	0.228233	1.1714	0.122641	1.86099	0.0627461	0.402413
C17G10.1	C17G10.1	1186.46	1224.97	810.44	633.004	612.702	591.552	794.937	651.937	769.109	3970.21	1692.14	1708.1	44.1838	35.6587	44.9616	38.2386	60.7422	40.0652	240.034	348.748	388.744	373.513	436.673	356.372		710.562	-0.810169	0.570315	0.262854	-3.08221	0.00205471	0.00647545		710.562	1.73242	3.32285	0.262356	6.60334	4.01999e-11	1.19899e-09		710.562	0.151864	1.111	0.313911	0.48378	0.628542	0.897672
C17G10.2	ttc-4	921.334	910.726	641.566	493.004	522.39	581.954	287.855	296.77	297.134	319.538	274.663	301.691	258.379	266.45	216.011	239.691	266.648	224.756	232.884	270.62	243.236	240.803	287.73	270.676		369.438	-0.630287	0.646048	0.145494	-4.33206	1.47724e-05	8.10409e-05		369.438	0.0194348	1.01356	0.156673	0.124047	0.901278	0.920342		369.438	-0.019695	0.986441	0.157703	-0.124887	0.900613	0.982817
C17G10.5	lys-8	476.522	378.238	377.074	612.39	599.421	640.411	346.951	355.167	381.211	215.233	241.273	200.758	961.477	1005.38	1185.62	957.831	1100.57	1435.51	1311.5	793.742	957.744	1091.64	719.89	1174.67		730.009	0.58901	1.50421	0.199523	2.9521	0.00315625	0.00936178		730.009	-0.720072	0.607067	0.208073	-3.46066	0.000538846	0.00153818		730.009	0.148295	1.10826	0.196633	0.754171	0.450747	0.821641
C17G10.6	C17G10.6	12.3314	11.4866	8.48225	6.87114	9.73948	6.97996	4.76581	0.957323	5.73249	4.96691	5.38555	5.54579	22.0919	11.8862	13.684	14.9224	19.561	26.3844	4.08568	3.3969	5.42939	6.42142	6.77012	12.541		9.6008	-0.449014	0.732543	0.475688	-0.943924	0.345208	0.461373		9.6008	0.481068	1.39578	0.65657	0.732698	0.463743	0.528375		9.6008	0.348483	1.27322	0.414832	0.840058	0.400876	0.790807
C17H11.2	C17H11.2	443.051	485.72	535.153	666.5	723.378	724.171	662.447	717.035	679.3	331.127	468.543	435.899	1157.42	1224.28	1036.07	1028.71	1108.8	1047.56	656.774	793.742	776.402	877.594	825.955	812.027		759.069	0.529226	1.44315	0.125616	4.21306	2.51936e-05	0.000131704		759.069	-0.727007	0.604156	0.12976	-5.60272	2.11017e-08	2.46358e-07		759.069	-0.10186	0.931831	0.122412	-0.832105	0.405349	0.79474
C17H11.6	C17H11.6	1192.63	1749.25	2115.16	2286.37	2202.01	2104.46	1618.47	1648.51	1523.89	986.759	1236.52	1367.59	1555.08	1607.61	1385.99	1520.22	1657.54	1613.36	1330.91	1162.87	1291.11	1377.39	1387.88	1382.64		1554.34	0.382137	1.30327	0.158375	2.41287	0.0158276	0.0369791		1554.34	-0.413889	0.750597	0.160071	-2.58566	0.00971915	0.0180138		1554.34	0.0748513	1.05325	0.159187	0.47021	0.638205	0.902415
C17H12.10	C17H12.10	22.0204	39.3827	26.2179	26.6257	22.1352	20.0674	8.57845	10.5306	14.3312	6.62254	9.694	7.76411	32.6576	24.763	34.2099	40.1039	26.7677	45.9284	34.7283	22.646	27.1469	32.1071	21.4387	32.3975		24.536	-0.349814	0.784685	0.316555	-1.10507	0.26913	0.379025		24.536	-0.445913	0.734119	0.468006	-0.952794	0.340694	0.404228		24.536	0.302548	1.23332	0.307418	0.984159	0.325038	0.738341
C17H12.14	vha-8	10239.5	8746.25	9047.47	14960.2	15658.4	15681.4	10548.6	10625.3	9808.29	11077.9	11124.4	9718.45	5850.51	6461.17	6594.7	6550.93	7076.98	7699.36	12217.2	11162.2	10404.9	11688.1	11461.8	11454.1		10244.1	0.723925	1.65167	0.0988869	7.32073	2.46621e-13	7.94205e-12		10244.1	0.0429167	1.03019	0.0991254	0.432954	0.665048	0.719093		10244.1	0.173812	1.12804	0.0994048	1.74853	0.0803724	0.451025
C17H12.9	ceh-48	899.314	937.801	1046.4	1613.86	1498.11	1652.51	2515.39	2618.28	2359.88	1192.06	1870.94	1958.77	632.98	805.293	748.709	627.673	835.977	760.262	1641.42	1311.2	1444.22	1235.05	1244.57	1310.53		1365.05	0.724284	1.65208	0.161222	4.49247	7.04033e-06	4.21343e-05		1365.05	-0.57501	0.671282	0.160658	-3.57908	0.0003448	0.00105916		1365.05	0.0238272	1.01665	0.1639	0.145377	0.884413	0.979283
C18A11.1	C18A11.1	60.7763	45.9465	30.8445	30.0612	27.4476	33.1548	2.85948	2.87197	1.91083	3.31127	8.61689	2.21832	26.8945	17.8294	21.5034	53.161	37.063	48.86	9.19279	3.3969	6.51526	14.9833	11.2835	17.7664		21.6029	-0.595523	0.661804	0.312939	-1.903	0.0570403	0.108163		21.6029	0.943484	1.92317	0.707845	1.3329	0.182566	0.234357		21.6029	1.07155	2.1017	0.332678	3.22099	0.00127749	0.0448717
C18A11.3	C18A11.3	267.768	212.503	252.925	365.029	302.809	329.803	147.74	167.531	157.644	59.6029	144.333	86.5144	221.879	197.114	233.605	316.168	259.441	257.004	374.861	280.81	244.322	234.382	273.062	312.479		237.472	0.444698	1.36103	0.205406	2.16497	0.0303903	0.0635573		237.472	-0.677297	0.625336	0.226123	-2.99526	0.00274214	0.0060771		237.472	0.351882	1.27622	0.208791	1.68533	0.0919251	0.475416
C18A11.5	xol-1	133.884	154.249	129.547	206.993	230.206	191.076	97.2225	88.0737	94.5861	129.14	93.7086	88.7327	534.047	542.805	454.503	667.777	667.134	639.089	51.071	86.0548	121.618	126.288	111.707	135.86		240.641	0.589021	1.50423	0.192341	3.06238	0.00219584	0.00684375		240.641	0.136896	1.09954	0.213627	0.640821	0.521639	0.582907		240.641	0.366312	1.28905	0.17989	2.03632	0.0417183	0.341811
C18A11.7	dim-1	6085.56	6637.63	9933.48	10181.3	10251.2	9932.48	15689	17317	15558.9	6549.69	11312.9	10487.1	10441.8	11320.7	11183.7	8298.71	9370.76	9471.02	27604.9	21225	23117.2	18378.1	16268.6	18685		13137.6	0.422403	1.34016	0.183726	2.29909	0.0214997	0.0477422		13137.6	-0.776221	0.583894	0.183725	-4.22492	2.3903e-05	0.000109479		13137.6	-0.279672	0.823778	0.18373	-1.52219	0.12796	0.539054
C18A3.1	damt-1	888.744	680.173	405.606	249.079	228.435	237.319	120.098	102.434	133.758	243.378	164.798	177.465	23.0524	27.7346	19.5485	23.3162	13.3839	31.2704	58.221	62.2765	40.1775	62.0737	97.0384	68.9753		173.265	-1.46512	0.362206	0.251404	-5.82773	5.61855e-09	6.92833e-08		173.265	0.71009	1.63591	0.26443	2.68536	0.00724516	0.0139834		173.265	-0.0432537	0.970464	0.344322	-0.12562	0.900033	0.982817
C18A3.3	C18A3.3	2518.25	2059.39	1501.36	737.788	787.127	766.051	1358.26	1254.09	1261.15	1721.86	1212.83	1390.88	509.074	511.109	459.39	505.496	510.646	533.551	744.616	868.474	829.61	865.821	1103.53	874.732		1036.88	-1.40756	0.376948	0.163772	-8.59465	8.35211e-18	6.90348e-16		1036.88	0.157352	1.11524	0.163938	0.959825	0.337143	0.400747		1036.88	0.066782	1.04738	0.168628	0.396031	0.692082	0.922781
C18A3.4	osta-2	876.412	863.138	1169.01	1448.95	1378.58	1372.43	724.403	716.077	687.899	769.87	638.727	633.33	249.734	243.668	230.673	214.509	234.732	261.89	644.517	482.36	533.166	404.549	353.175	409.671		647.561	0.529523	1.44345	0.138623	3.81986	0.000133525	0.000574613		647.561	-0.0632426	0.957111	0.142935	-0.442456	0.658159	0.712615		647.561	-0.026522	0.981784	0.154493	-0.171672	0.863696	0.973685
C18A3.6	rab-3	867.604	946.826	1276.96	1485.02	1409.57	1348	1056.1	1006.15	1028.03	418.876	703.353	596.727	919.214	899.393	1012.61	862.7	845.242	944.953	2258.36	1417.64	1668.99	1307.83	1005.36	1497.6		1115.96	0.45633	1.37205	0.193034	2.36399	0.0180793	0.0412173		1115.96	-0.841711	0.557981	0.196121	-4.29179	1.77236e-05	8.53338e-05		1115.96	-0.0938353	0.937028	0.194334	-0.482856	0.629198	0.897996
C18A3.8	hlh-14	1664.74	1379.22	1172.86	1446.37	1511.39	1496.33	2102.67	2017.08	2116.24	1465.24	1415.32	2054.16	1983.47	1966.18	1537.49	2262.61	2374.09	2043.33	1070.45	1860.37	1769.98	1553.98	1958.82	1279.18		1729.23	0.0791971	1.05643	0.200426	0.395143	0.692737	0.781642		1729.23	-0.337102	0.79163	0.200535	-1.68101	0.0927615	0.129525		1729.23	0.283774	1.21738	0.20008	1.4183	0.156102	0.580138
C18B12.2	seb-3	136.527	167.377	241.358	301.471	290.414	300.138	244.009	246.989	227.389	110.928	190.649	156.391	280.471	302.109	256.086	270.468	277.973	279.479	486.196	384.982	395.259	367.091	266.291	424.302		275.181	0.7074	1.63286	0.200777	3.52332	0.000426181	0.00161506		275.181	-0.63546	0.643736	0.20883	-3.04295	0.00234274	0.00532239		275.181	-0.0186207	0.987176	0.200058	-0.0930767	0.925843	0.989208
C18B12.3	dsc-1	22.9012	19.6914	22.3623	26.6257	35.4163	32.2823	45.7517	45.9515	48.7262	13.2451	44.1615	34.3839	27.855	21.7915	25.4131	20.5183	17.502	15.6352	29.6212	15.8522	20.6317	21.4047	33.8506	27.1721		27.8644	0.537805	1.45176	0.309059	1.74014	0.0818349	0.144774		27.8644	-0.554747	0.680777	0.302216	-1.83559	0.0664177	0.0963758		27.8644	-0.482911	0.715532	0.33888	-1.42502	0.154152	0.576133
C18B12.6	C18B12.6	698.488	635.046	590.673	480.98	480.776	498.195	897.878	971.683	907.644	715.235	764.749	864.035	603.204	545.777	533.675	649.124	611.54	583.389	606.724	723.539	770.973	693.513	825.955	744.097		683.204	-0.397663	0.759087	0.120441	-3.30172	0.000960935	0.00331558		683.204	-0.242059	0.845538	0.119225	-2.03026	0.0423301	0.0646257		683.204	0.132215	1.09597	0.121177	1.09109	0.275233	0.699857
C18B2.1	C18B2.1	3.52327	4.10237	9.25336	3.43557	4.42704	1.74499	5.71897	8.61591	4.77708	0	1.07711	0	12.4867	11.8862	10.7517	16.7877	9.26575	12.7036	4.08568	1.1323	0	1.07024	0	0		5.28523	-0.831868	0.561801	0.674891	-1.2326	0.217727	0.319974		5.28523	-3.82405	0.0706069	1.28751	-2.9701	0.00297701	NA		5.28523	0.147118	1.10736	0.525658	0.279875	0.779573	0.952307
C18B2.3	C18B2.3	376.989	382.341	576.793	617.543	579.056	484.235	655.775	682.571	725.16	259.935	539.632	435.899	535.968	521.014	626.53	497.102	416.959	467.102	928.471	576.34	668.9	490.168	245.981	429.528		530	0.330563	1.2575	0.247556	1.33531	0.181775	0.27576		530	-0.7347	0.600943	0.249053	-2.94998	0.00317799	0.00690174		530	-0.285396	0.820516	0.248201	-1.14986	0.250202	0.6782
C18B2.4	C18B2.4	894.91	814.73	885.238	1387.11	1369.72	1361.09	929.332	922.859	949.683	1400.67	1143.89	1120.25	525.402	539.834	548.336	857.105	1046	1165.8	1408.54	1323.66	1563.66	2006.69	1767	1886.37		1159.08	0.666306	1.587	0.120107	5.54758	2.89644e-08	3.07808e-07		1159.08	0.384344	1.30527	0.121488	3.16363	0.00155817	0.00378936		1159.08	0.927125	1.90148	0.123482	7.50819	5.99515e-14	2.6756e-11
C18B2.5	C18B2.5	1025.27	1308.66	2243.94	2590.42	2660.65	2433.39	2872.83	3185.97	3060.19	1309.61	2322.25	1857.84	2665.43	2831.9	3032.95	2250.48	2447.19	2567.11	4741.44	3506.73	3410.74	3464.36	2823.14	3653.6		2677.75	0.746889	1.67817	0.223087	3.34798	0.000814029	0.00286858		2677.75	-0.730958	0.602504	0.223293	-3.27355	0.00106207	0.00274846		2677.75	-0.231692	0.851636	0.22288	-1.03953	0.298557	0.718552
C18C4.2	cft-1	68.7037	69.7402	89.4491	103.067	99.1656	90.7395	307.871	294.855	281.847	87.7487	134.639	105.37	350.588	337.768	313.754	413.164	427.254	418.242	103.163	64.5411	74.9255	71.7059	50.7759	72.1105		184.633	0.35898	1.28252	0.186666	1.92312	0.0544652	0.104022		184.633	-1.4148	0.375062	0.176891	-7.99815	1.26305e-15	2.65427e-13		184.633	0.328685	1.25587	0.157468	2.08732	0.0368594	0.321326
C18C4.9	glb-6	58.1339	50.0489	87.1358	69.5703	88.5407	68.9271	89.5972	88.0737	68.7899	51.3247	62.4724	65.4404	283.352	317.957	239.469	263.94	212.083	252.118	101.121	79.261	89.0419	78.1273	44.0058	81.5162		120.419	0.212217	1.15847	0.232757	0.91175	0.3619	0.478779		120.419	-0.447369	0.733379	0.24491	-1.82666	0.0677502	0.0980533		120.419	-0.206752	0.866486	0.206506	-1.00119	0.316733	0.730885
C18D1.3	flp-4	49.3257	31.9985	42.4112	54.1102	54.0098	47.1147	98.1756	81.3724	99.3632	44.7022	84.0146	54.3488	93.1701	60.4218	57.6682	85.8037	71.0374	99.6744	187.941	166.448	171.569	165.887	104.937	175.573		90.8782	0.329495	1.25657	0.263224	1.25177	0.210655	0.311419		90.8782	-0.585215	0.66655	0.25487	-2.29613	0.0216682	0.0360885		90.8782	0.280087	1.21427	0.247534	1.13151	0.257842	0.68979
C18D11.1	C18D11.1	1744.02	1576.95	1637.07	3301.58	3317.62	3245.68	1323.94	1367.06	1381.53	637.42	1090.04	1048.15	1379.3	1397.62	1447.57	1171.41	1248.82	1395.44	1208.34	959.058	1091.31	1025.29	930.892	1053.44		1499.15	0.992602	1.98977	0.147249	6.74096	1.57343e-11	3.45272e-10		1499.15	-0.54772	0.6841	0.150313	-3.64387	0.000268573	0.000853247		1499.15	-0.146899	0.90319	0.148888	-0.98664	0.323819	0.737596
C18D11.2	maa-1	349.684	240.399	205.887	182.085	178.852	167.519	94.363	89.9883	91.7199	71.1923	86.1689	92.0602	65.3151	59.4312	43.9842	53.161	45.2992	57.6548	61.2852	54.3504	92.2995	81.338	111.707	76.2908		110.501	-0.589155	0.664732	0.211381	-2.78718	0.00531696	0.0146818		110.501	-0.136509	0.909718	0.238227	-0.57302	0.566631	0.625843		110.501	-0.11099	0.925953	0.253313	-0.438152	0.661276	0.911868
C18D11.3	C18D11.3	1842.67	1701.66	1358.7	2017.54	2206.43	2128.89	3502.87	3468.38	3755.74	9165.6	4731.75	5083.27	1550.27	1763.13	1770.12	1822.4	2030.23	1972.97	1180.76	1554.65	1602.75	1190.1	1572.93	1198.71		2507.19	0.373887	1.29584	0.199131	1.8776	0.0604362	0.113018		2507.19	0.822602	1.76859	0.198351	4.1472	3.36565e-05	0.00014717		2507.19	0.196552	1.14596	0.199417	0.985635	0.324312	0.73824
C18D11.4	rsp-8	2871.46	3466.5	4837.19	2985.51	3471.68	3105.21	1897.74	1801.68	2107.65	7605.99	3413.36	3920.88	1910.47	1826.52	1672.38	1883.02	1956.1	1959.29	2391.15	4019.66	3349.93	3635.59	4428.79	3452.94		3082.11	-0.224948	0.855626	0.237996	-0.945175	0.34457	0.460851		3082.11	1.36261	2.57151	0.238369	5.7164	1.08801e-08	1.40069e-07		3082.11	0.100182	1.07191	0.238802	0.419519	0.674837	0.916486
C18D11.7	C18D11.7	7.04653	13.1276	13.88	10.3067	10.6249	4.36248	0.953161	0.957323	0.955415	0	0	0	2.88155	3.96208	1.95485	1.8653	4.11811	0.9772	0	0	0	0	0	0		3.24888	-0.434265	0.740071	0.634074	-0.684882	0.493419	0.6062		3.24888	-2.04868	0.241706	1.5367	-1.33317	0.182478	NA		3.24888	-0.352733	0.783099	0.89845	-0.392602	0.694614	0.922781
C18E3.1	C18E3.1	14.9739	23.7937	6.94002	8.58892	7.96866	8.72495	12.3911	10.5306	20.0637	44.7022	17.2338	18.8557	37.4601	25.7535	31.2776	41.0366	42.2106	29.316	8.17137	13.5876	19.5458	22.475	21.4387	12.541		20.8159	-0.847467	0.55576	0.462856	-1.83095	0.0671076	0.12308		20.8159	0.857107	1.8114	0.429805	1.99418	0.0461329	0.0697838		20.8159	0.251399	1.19036	0.379998	0.66158	0.50824	0.85125
C18E3.3	C18E3.3	933.666	1067.44	963.892	1340.73	1228.06	1267.74	437.501	403.99	413.695	968.547	552.558	659.949	72.9992	96.0805	98.7201	65.2854	97.8052	76.2216	280.891	380.453	285.586	308.228	301.27	322.93		526.009	0.371746	1.29392	0.176207	2.10971	0.0348832	0.0711727		526.009	0.79179	1.73122	0.181119	4.37166	1.23303e-05	6.22174e-05		526.009	-0.165126	0.891851	0.214766	-0.768863	0.441975	0.816902
C18E3.8	hop-1	610.406	477.516	381.701	319.508	336.455	312.353	526.145	397.289	542.676	4644.06	1861.25	1456.33	256.458	250.602	464.278	261.142	354.158	313.681	102.142	195.888	134.649	125.218	187.307	112.869		609.336	-0.601581	0.659031	0.328146	-1.83327	0.0667618	0.122476		609.336	2.44006	5.42664	0.32608	7.483	7.26436e-14	6.62492e-12		609.336	-0.0645996	0.956211	0.330037	-0.195734	0.844818	0.967784
C18E9.10	sftd-3	1824.17	1202.81	872.129	820.242	822.543	768.668	642.431	633.748	710.829	2379.15	1102.96	1002.68	381.325	345.692	322.551	459.796	448.874	426.059	624.088	914.898	749.255	743.814	798.874	671.986		819.566	-0.692924	0.618599	0.256	-2.70673	0.00679488	0.0181819		819.566	1.17218	2.25353	0.256785	4.56484	4.99874e-06	2.90374e-05		819.566	0.346729	1.27167	0.260397	1.33154	0.183012	0.611793
C18E9.11	ooc-5	3808.65	2952.88	1959.4	1196.44	1195.3	1186.59	553.787	523.656	558.918	1753.32	887.539	905.073	1147.82	1064.81	1207.12	1299.18	1247.79	1150.16	480.068	679.38	558.141	572.577	608.183	541.351		1168.26	-1.28503	0.410361	0.22308	-5.76041	8.39096e-09	9.98726e-08		1168.26	1.11264	2.1624	0.225894	4.92548	8.41556e-07	6.06141e-06		1168.26	0.112524	1.08112	0.224068	0.502188	0.615535	0.894306
C18E9.2	C18E9.2	3739.07	3219.54	2030.34	1613.86	1611.44	1585.32	4103.36	4047.56	3903.83	6781.48	4304.13	4362.32	1621.35	1418.43	1450.5	2008.93	1577.24	1482.41	857.993	726.936	883.904	739.533	974.898	813.072		2327.39	-0.901753	0.535236	0.198927	-4.53308	5.81304e-06	3.59697e-05		2327.39	0.357225	1.28096	0.198347	1.80101	0.0717007	0.103183		2327.39	0.17487	1.12886	0.199646	0.875901	0.381084	0.780067
C18E9.3	szy-20	2091.94	2426.14	2532.34	2921.09	3073.25	2807.69	2963.38	2824.1	3162.42	5708.63	3278.72	3773.36	2363.83	2442.62	2523.72	2382.92	2399.83	2197.72	1981.56	2709.59	2607.19	2435.86	2933.72	2471.61		2792.22	0.320016	1.24834	0.166586	1.92102	0.0547289	0.104419		2792.22	0.510665	1.42471	0.166531	3.06649	0.00216586	0.00497751		2792.22	-0.0705225	0.952293	0.166945	-0.422429	0.672712	0.91582
C18E9.4	C18E9.4	4006.83	3202.31	1575.38	906.99	911.084	881.22	569.991	652.894	581.848	802.983	566.56	607.819	670.44	587.379	552.246	1190.99	699.049	807.167	1356.45	1367.82	1253.1	1220.07	1488.3	1230.06		1153.71	-1.7022	0.307317	0.237599	-7.16418	7.82536e-13	2.26509e-11		1153.71	0.129657	1.09403	0.240903	0.538212	0.590431	0.64902		1153.71	0.575723	1.49042	0.239716	2.40169	0.0163195	0.223898
C18E9.5	C18E9.5	313.571	252.706	227.478	306.624	308.122	301.883	439.407	412.606	377.389	225.166	347.907	285.054	313.128	316.967	293.228	369.329	328.419	323.453	367.711	268.355	276.899	258.997	253.88	277.991		310.261	0.209397	1.1562	0.160548	1.30426	0.192144	0.288643		310.261	-0.508763	0.702825	0.162192	-3.1368	0.00170802	0.00408975		310.261	0.1458	1.10634	0.160713	0.907207	0.364297	0.770539
C18E9.6	tomm-40	1658.58	1734.48	1421.16	1543.43	1577.8	1477.13	3577.21	3619.64	3596.18	8743.41	4645.58	4543.11	3008.34	2726.9	2693.79	2607.69	2897.09	2803.59	2593.39	3361.8	2631.08	2395.19	2822.01	2405.77		2961.85	-0.0660963	0.955219	0.188122	-0.351348	0.725327	0.806654		2961.85	0.731613	1.66049	0.187007	3.91223	9.14493e-05	0.00034426		2961.85	-0.0208465	0.985654	0.187417	-0.11123	0.911434	0.983733
C18E9.7	C18E9.7	350.565	455.363	713.28	685.396	644.576	650.009	908.363	961.152	867.517	312.915	570.869	485.811	1441.74	1496.68	1472.98	1177	1215.87	1299.68	1086.79	750.714	801.377	794.116	564.177	736.781		851.822	0.381125	1.30236	0.218799	1.74189	0.0815273	0.144381		851.822	-0.993655	0.502204	0.220198	-4.51255	6.40539e-06	3.58391e-05		851.822	-0.256626	0.837043	0.216428	-1.18574	0.235727	0.667576
C18E9.8	C18E9.8	0.880817	0	0	0	0	0	20.0164	31.5917	26.7516	41.3909	25.8507	31.0564	0.960516	0	0.977426	0	5.14764	8.7948	3.06426	3.3969	2.17175	2.14047	4.51341	1.04508		8.73961	-0.877887	0.544164	1.71115	-0.513038	0.607925	0.709055		8.73961	0.312697	1.24203	0.453175	0.690014	0.490185	NA		8.73961	2.82039	7.06355	1.15841	2.43471	0.0149038	0.216205
C18E9.9	C18E9.9	727.554	505.412	491.97	558.28	540.098	515.645	283.089	276.666	261.784	140.729	193.88	190.775	659.875	622.047	543.449	774.099	718.611	800.327	973.414	808.462	765.543	861.54	697.323	850.695		573.386	-0.0947846	0.936412	0.158416	-0.598328	0.549621	0.657548		573.386	-0.632878	0.644889	0.174253	-3.63195	0.000281287	0.00088772		573.386	0.32915	1.25627	0.158044	2.08264	0.0372836	0.32317
C18F10.2	C18F10.2	3.52327	3.28189	3.85557	5.15335	7.08326	5.23497	0.953161	1.91465	0.955415	8.27818	1.07711	4.43663	15.3683	7.92416	8.79684	20.5183	20.5906	15.6352	6.12852	3.3969	9.77289	2.14047	6.77012	4.18032		6.95708	0.709167	1.63486	0.625424	1.1339	0.256837	0.365247		6.95708	1.72515	3.30615	0.922942	1.86919	0.0615968	NA		6.95708	0.819597	1.76491	0.475317	1.72432	0.0846509	0.460062
C18F10.6	srg-3	0	0	1.54223	0.858892	1.77081	0	2.85948	3.82929	3.82166	4.96691	2.15422	2.21832	12.4867	7.92416	12.7065	8.39384	10.2953	14.658	0	2.2646	1.08588	0	2.25671	3.13524		4.13453	0.679565	1.60166	1.39167	0.488309	0.625331	0.72515		4.13453	-0.258532	0.835938	0.824953	-0.313391	0.753984	NA		4.13453	0.00747581	1.0052	0.56505	0.0132303	0.989444	1
C18F10.7	C18F10.7	1974.79	1937.14	1373.35	1771.89	1846.07	1906.4	494.691	412.606	484.395	2528.16	1017.87	1043.72	501.39	510.118	519.991	494.304	528.148	571.662	615.917	810.726	660.213	692.443	767.281	740.962		1008.51	0.0639474	1.04532	0.23847	0.268157	0.788578	0.853965		1008.51	1.71877	3.29156	0.241298	7.12303	1.05577e-12	6.18317e-11		1008.51	0.0577576	1.04085	0.242529	0.238147	0.811767	0.962325
C18F3.2	sax-7	4674.49	6607.27	8799.94	10625.4	10906.4	10260.5	18470.4	17695.2	18089.8	48033.3	26131.8	26838.3	8386.27	8743.32	9540.66	6635.8	8173.42	7035.84	8715.78	9737.77	8831.44	9189.05	8963.64	9015.9		12920.9	0.662715	1.58306	0.203242	3.26073	0.00111128	0.00375763		12920.9	0.89645	1.86148	0.203046	4.41501	1.01005e-05	5.26133e-05		12920.9	-0.287946	0.819067	0.203308	-1.4163	0.156687	0.58125
C18F3.4	nsy-7	2831.83	2154.56	1603.14	1630.18	1532.64	1571.36	781.592	804.151	770.065	476.823	550.404	611.146	2042.06	1898.83	1699.74	2253.28	1994.2	1975.9	1016.31	1071.16	1094.56	1008.16	1149.79	949.977		1394.66	-0.47667	0.718635	0.157727	-3.02211	0.00251018	0.00765923		1394.66	-0.520928	0.696923	0.163381	-3.18842	0.00143053	0.00352332		1394.66	0.141898	1.10336	0.157867	0.898845	0.368735	0.772603
C18G1.1	C18G1.1	155.905	114.046	135.716	171.778	144.321	171.009	75.2998	82.3298	85.9874	41.3909	48.47	69.877	48.0258	53.4881	51.8036	65.2854	50.4469	69.3812	241.055	187.962	195.458	138.061	117.349	172.438		111.953	0.265417	1.20198	0.189491	1.40069	0.161308	0.251461		111.953	-0.587005	0.665724	0.228462	-2.56938	0.0101882	0.0187518		111.953	0.274868	1.20988	0.228462	1.20313	0.228928	0.662423
C18H7.1	C18H7.1	15.8547	15.589	31.6156	24.049	15.0519	13.9599	21.9227	39.2502	21.9745	13.2451	47.3929	35.4931	65.3151	52.4976	118.269	166.944	119.425	85.9936	29.6212	21.5137	20.6317	46.0202	27.0805	31.3524		45.0026	-0.255062	0.837951	0.421077	-0.605738	0.544688	0.653433		45.0026	0.247401	1.18707	0.408241	0.606017	0.544504	0.604863		45.0026	0.658069	1.57797	0.360786	1.82399	0.0681539	0.41867
C18H9.1	C18H9.1	10.5698	5.74331	9.25336	4.29446	6.19785	5.23497	30.5012	40.2076	17.1975	4.96691	17.2338	17.7465	32.6576	14.8578	29.3228	27.9795	16.4724	26.3844	10.2142	6.7938	5.42939	3.21071	7.89848	7.31556		14.9035	-0.699699	0.615701	0.540844	-1.29372	0.195763	0.293133		14.9035	-1.07337	0.475207	0.441453	-2.43146	0.0150382	0.0263224		14.9035	-0.114926	0.92343	0.406103	-0.282996	0.77718	0.951042
C18H9.3	gyf-1	690.56	1044.46	1483.62	1273.74	1384.78	1308.74	3310.33	2990.68	3182.49	9104.34	4496.94	4864.77	3052.52	3193.44	3763.09	2420.22	3103	2535.83	3104.1	4472.58	3546.47	3674.12	3761.93	3552.23		3138.12	0.301242	1.2322	0.239625	1.25714	0.208704	0.30878		3138.12	0.960866	1.94648	0.238293	4.03228	5.52378e-05	0.000224502		3138.12	-0.312674	0.805148	0.238507	-1.31096	0.189871	0.617467
C18H9.5	C18H9.5	10.5698	12.3071	7.71113	2.57668	4.42704	10.4699	11.4379	5.74394	9.55415	11.5894	14.0024	14.4191	12.4867	19.8104	12.7065	21.4509	21.6201	11.7264	26.5569	9.05839	9.77289	12.8428	18.0537	12.541		12.6431	-0.80515	0.572303	0.521023	-1.54533	0.122268	0.201094		12.6431	0.594959	1.51043	0.500205	1.18943	0.234271	0.291665		12.6431	0.285322	1.21868	0.440097	0.648316	0.516781	0.855093
C18H9.7	rpy-1	317.975	336.394	593.757	668.218	669.368	563.632	654.822	688.315	659.236	291.392	466.389	401.515	849.096	886.516	866	696.689	646.544	817.917	1067.38	625.029	806.807	513.714	449.085	517.314		627.213	0.605957	1.52199	0.215895	2.80672	0.0050049	0.0139548		627.213	-0.783564	0.58093	0.218078	-3.59304	0.000326839	0.00101117		627.213	-0.267519	0.830747	0.214493	-1.24721	0.212319	0.645638
C18H9.8	ift-74	121.553	118.148	159.62	109.079	146.092	154.432	142.021	177.105	126.115	46.3578	101.248	99.8243	181.538	222.867	207.214	160.416	188.404	207.166	57.1996	27.1752	65.1526	59.9332	60.9311	59.5695		124.965	0.0350705	1.02461	0.24147	0.145238	0.884523	0.924929		124.965	-0.821226	0.565961	0.253965	-3.23362	0.00122231	0.00308602		124.965	-0.137843	0.908877	0.237855	-0.579524	0.562236	0.873863
C23F12.1	fln-2	3063.48	5470.1	11493.4	13825.6	12467.4	13510.6	19272	21185.6	18494.9	8149.04	13202.1	14297.1	12536.7	14580.5	12822.9	8738.92	9671.39	7908.48	5056.03	4663.94	5030.87	4854.59	4288.87	4127.02		10363	0.990864	1.98738	0.279751	3.54196	0.000397173	0.00151361		10363	-0.725596	0.604747	0.27971	-2.5941	0.00948386	0.0176479		10363	-0.601744	0.658957	0.279746	-2.15104	0.0314729	0.298792
C23F12.4	C23F12.4	1009.42	738.426	528.984	481.838	433.849	423.16	285.948	310.173	301.911	248.345	228.347	259.543	543.652	502.194	463.3	553.061	474.612	504.235	463.725	370.262	401.775	493.379	590.129	490.142		462.517	-0.764949	0.588474	0.175679	-4.35423	1.33533e-05	7.39101e-05		462.517	-0.287245	0.819466	0.185901	-1.54515	0.122311	0.164857		462.517	0.0218465	1.01526	0.177286	0.123227	0.901927	0.982817
C23G10.10	C23G10.10	8.80817	9.02521	8.48225	4.29446	4.42704	5.23497	0	0.957323	0.955415	3.31127	0	0	4.80258	2.97156	1.95485	8.39384	1.02953	2.9316	3.06426	0	1.08588	1.07024	3.38506	1.04508		3.21794	-0.914747	0.530437	0.689775	-1.32615	0.184789	0.279627		3.21794	0.418525	1.33656	1.52633	0.274204	0.783928	NA		3.21794	0.364413	1.28736	0.807068	0.451528	0.651609	0.908312
C23G10.2	C23G10.2	1896.4	1359.52	749.522	384.784	412.6	415.308	222.087	193.379	234.077	380.796	275.74	263.98	790.505	661.668	681.266	876.69	785.53	867.754	717.037	592.193	616.778	509.433	556.278	512.089		623.142	-1.72328	0.302859	0.219824	-7.83936	4.52832e-15	2.09231e-13		623.142	0.497441	1.41171	0.228804	2.17409	0.0296985	0.0473665		623.142	0.245975	1.18589	0.219444	1.1209	0.262329	0.692044
C23G10.3	rps-3	21894.5	16429.2	10182.6	12266.7	13606.9	12829.2	12907.7	13291.5	13776.1	8759.97	10334.9	10645.7	10483.1	11481.1	9754.72	10111.8	10180	11054.1	19830.9	16883.7	18712.9	15731.4	18187.9	17476.9		13617.2	-0.325682	0.797921	0.18049	-1.80443	0.0711633	0.129181		13617.2	-0.426545	0.744042	0.180648	-2.36119	0.0182163	0.0310391		13617.2	-0.017067	0.98824	0.18062	-0.0944914	0.924719	0.988425
C23G10.4	rpn-2	5033.87	5444.66	4908.14	5893.72	6021.65	6206.93	6937.11	6298.23	6909.56	19816.3	10387.7	10693.4	4744.95	4665.35	5436.45	3130.9	4089.29	3687.95	6156.1	9485.27	7732.53	8390.65	9732.05	8337.65		7089.18	0.236088	1.17779	0.197485	1.19547	0.231903	0.336559		7089.18	1.02127	2.02971	0.197364	5.17454	2.28468e-07	1.9265e-06		7089.18	-0.444801	0.734685	0.197769	-2.24909	0.0245065	0.271862
C23G10.7	C23G10.7	1132.73	1076.46	819.693	862.328	850.876	776.521	642.431	537.058	610.51	2048.02	1078.19	1070.34	746.321	705.251	978.404	789.954	886.424	719.219	489.261	658.998	676.501	622.878	739.072	575.839		837.22	-0.282557	0.822133	0.214558	-1.31692	0.187864	0.283358		837.22	1.22653	2.34004	0.215606	5.68876	1.27968e-08	1.62115e-07		837.22	-0.0206753	0.985771	0.21547	-0.0959547	0.923557	0.988239
C23G10.8	C23G10.8	4517.71	4969.61	4753.91	4934.34	4992.81	4972.35	3550.53	3390.84	3725.16	10677.2	5498.65	6159.16	2705.77	2923.03	2832.58	2481.78	2976.37	2599.35	1748.67	2701.67	2542.04	2504.35	2955.16	2475.79		3899.53	0.0651778	1.04621	0.191609	0.34016	0.733736	0.812483		3899.53	1.06562	2.09306	0.191775	5.5566	2.75085e-08	3.09525e-07		3899.53	-0.0706149	0.952232	0.192263	-0.367283	0.713408	0.929782
C23H3.1	egl-26	1057.86	1085.49	1070.31	907.849	912.855	881.22	1418.3	1501.08	1350	2735.11	1859.09	1711.43	1599.26	1775.01	1510.12	1583.64	1703.87	1743.33	1703.73	1786.77	1899.2	1949.97	2097.61	1909.36		1573.02	-0.250252	0.840749	0.139056	-1.79965	0.0719154	0.130366		1573.02	0.559809	1.47407	0.137911	4.05921	4.92386e-05	0.000202707		1573.02	0.042579	1.02995	0.137667	0.309289	0.757102	0.942072
C23H3.2	C23H3.2	180.567	157.531	227.478	547.973	529.473	573.229	508.035	524.613	438.536	279.802	423.305	354.931	283.352	220.886	214.056	415.029	365.482	430.945	192.027	118.891	152.023	255.787	177.152	265.45		326.523	1.54414	2.91629	0.194462	7.94055	2.01292e-15	9.72347e-14		326.523	-0.469884	0.722022	0.193736	-2.42538	0.0152922	0.026682		326.523	0.754079	1.68655	0.195441	3.85834	0.00011416	0.00679516
C23H3.3	ascc-1	814.755	689.198	438.763	462.084	511.765	469.402	311.684	302.514	242.675	301.326	225.116	255.106	186.34	173.341	187.666	207.048	223.408	176.873	220.627	204.946	220.433	237.593	321.581	243.504		317.823	-0.427873	0.743357	0.18762	-2.28053	0.0225765	0.0496676		317.823	-0.138428	0.908509	0.196926	-0.702944	0.48209	0.54604		317.823	0.14957	1.10924	0.200323	0.746641	0.45528	0.82434
C23H4.1	cab-1	972.421	1007.54	1167.47	2696.06	2678.36	2747.49	784.452	746.712	844.587	420.531	813.219	570.108	587.836	626.009	652.921	499.9	560.063	622.477	1018.36	756.376	791.604	989.969	675.884	1067.03		1012.39	1.36747	2.58018	0.191793	7.12994	1.00416e-12	2.85111e-11		1012.39	-0.392373	0.761875	0.195758	-2.00438	0.0450293	0.0682363		1012.39	-0.150106	0.901184	0.195747	-0.766837	0.443178	0.817261
C23H4.8	C23H4.8	89.8433	55.7922	41.6401	65.2758	52.239	62.8197	52.4239	43.0795	38.2166	36.424	59.2411	52.1305	76.8413	88.1563	79.1715	181.867	133.839	136.808	241.055	182.3	168.311	247.225	239.211	295.758		113.319	-0.0463777	0.968365	0.247927	-0.187062	0.851612	0.90069		113.319	0.168119	1.12359	0.272921	0.615997	0.537896	0.59892		113.319	0.891664	1.85532	0.234581	3.80109	0.000144063	0.00809632
C23H5.15	C23H5.15	0.880817	0	0	0.858892	0	0	2.85948	0.957323	0.955415	0	3.23133	0	18.2498	12.8768	15.6388	16.7877	11.3248	21.4984	0	0	3.25763	3.21071	0	2.09016		4.77825	0.0839078	1.05989	1.73067	0.0484829	0.961331	0.975711		4.77825	-0.391283	0.762451	1.15938	-0.337495	0.735744	NA		4.77825	0.0867554	1.06198	0.551828	0.157215	0.875076	0.976793
C23H5.8	C23H5.8	268.649	299.473	245.214	420.857	410.829	516.517	8.57845	11.4879	10.5096	3.31127	3.23133	4.43663	69.1572	59.4312	45.939	55.9589	33.9744	60.5864	59.2424	67.938	68.4103	49.2309	39.4924	54.3441		119.45	0.729426	1.65798	0.183587	3.97318	7.09182e-05	0.000327068		119.45	-1.46322	0.362683	0.571957	-2.55827	0.0105195	0.0193069		119.45	-0.209097	0.865079	0.23532	-0.888564	0.374238	0.776205
C23H5.9	grl-20	17.6163	15.589	15.4223	11.1656	17.7081	17.4499	1.90632	1.91465	6.68791	1.65564	4.30844	2.21832	2.88155	0.990521	1.95485	0.932649	2.05906	3.9088	46.9854	23.7783	38.0057	18.194	5.64177	17.7664		11.5309	-0.0696125	0.952894	0.43478	-0.16011	0.872795	0.916225		11.5309	-0.295121	0.815004	0.777755	-0.379452	0.704352	0.753834		11.5309	0.228569	1.17167	0.871035	0.262411	0.793005	0.953842
C24A1.1	flp-24	245.748	183.786	128.776	273.128	275.362	257.386	219.227	214.44	235.988	104.305	196.034	163.046	111.42	93.1089	95.7878	193.991	115.307	136.808	206.327	165.316	136.821	197.994	124.119	216.331		178.773	0.531484	1.44542	0.247549	2.14698	0.0317946	0.0660636		178.773	-0.519685	0.697524	0.25414	-2.04487	0.0408672	0.0627005		178.773	0.572375	1.48697	0.259385	2.20666	0.0273379	0.281428
C24A1.2	elf-1	691.441	652.276	923.794	1291.77	1412.22	1293.91	1376.37	1742.33	1380.57	466.889	1025.41	936.13	971.082	1158.91	1030.21	942.908	951.284	855.05	1177.7	797.139	845.898	614.316	554.022	622.868		988.104	0.817814	1.76273	0.213935	3.82272	0.000131989	0.000569197		988.104	-0.88548	0.541308	0.214691	-4.12445	3.71629e-05	0.000159477		988.104	-0.200956	0.869974	0.214342	-0.937547	0.348477	0.758433
C24A1.3	sel-15	350.565	376.597	547.49	476.685	481.661	492.96	820.672	874.993	664.969	350.995	560.098	531.287	669.48	755.767	681.266	645.393	721.699	688.926	1162.38	886.59	966.431	747.025	719.89	696.023		661.243	0.186016	1.13762	0.177999	1.04504	0.296004	0.408245		661.243	-0.704392	0.613701	0.178219	-3.95241	7.73694e-05	0.000299785		661.243	-0.0351175	0.975952	0.176196	-0.19931	0.842021	0.967705
C24A11.8	frm-4	1390.81	1754.17	2065.81	2861.83	2595.13	2655.88	4079.53	3890.56	4351.92	12571.2	6482.05	6760.32	2742.27	2885.39	3497.23	2658.05	3344.94	2986.32	2276.75	2461.62	2316.18	2519.34	2577.16	2438.17		3506.78	0.6385	1.55671	0.197013	3.24091	0.00119149	0.00399438		3506.78	1.06637	2.09416	0.19628	5.43291	5.54413e-08	5.73268e-07		3506.78	-0.0216554	0.985102	0.19675	-0.110066	0.912357	0.983945
C24A11.9	coq-1	421.911	453.722	468.066	401.103	451.558	467.657	397.468	450.899	402.23	322.849	332.827	305.019	591.678	621.056	629.463	484.978	495.203	485.669	952.986	1072.29	811.15	924.684	1059.52	911.309		579.804	-0.0260622	0.982097	0.121488	-0.214525	0.830138	0.884981		579.804	-0.380779	0.768023	0.128211	-2.96994	0.00297858	0.00651475		579.804	-0.329728	0.795687	0.120841	-2.7286	0.00636034	0.131744
C24A3.1	C24A3.1	5.2849	6.56379	17.7356	17.1778	13.2811	11.3424	10.4848	13.4025	22.93	8.27818	14.0024	5.54579	21.1314	19.8104	21.5034	25.1815	24.7087	17.5896	26.5569	18.1168	27.1469	26.7559	21.4387	18.8114		17.2825	0.476794	1.39165	0.42598	1.11929	0.263018	0.371905		17.2825	-0.731493	0.60228	0.464249	-1.57565	0.115107	0.156805		17.2825	0.111754	1.08054	0.379244	0.294676	0.768242	0.9462
C24A3.4	C24A3.4	223.727	176.402	190.465	156.318	169.998	174.499	216.368	202.952	196.816	109.272	176.646	173.029	156.564	143.625	132.93	170.675	160.606	143.648	139.935	159.654	144.422	200.134	194.077	186.024		170.783	-0.236674	0.8487	0.156551	-1.5118	0.130586	0.212287		170.783	-0.40284	0.756368	0.163811	-2.45918	0.0139253	0.0246827		170.783	0.133137	1.09668	0.164189	0.810875	0.417437	0.801335
C24A3.6	twk-18	681.752	704.787	832.802	935.334	1010.25	1029.54	1627.05	1656.17	1472.29	579.472	1072.8	1090.3	846.215	874.63	812.241	975.551	792.737	775.897	2464.69	1739.21	1958.92	2132.98	1972.36	2314.85		1264.7	0.422513	1.34026	0.184923	2.2848	0.0223244	0.0492062		1264.7	-0.789802	0.578423	0.184928	-4.27086	1.94724e-05	9.20172e-05		1264.7	0.0065485	1.00455	0.185518	0.0352984	0.971842	1
C24B5.1	C24B5.1	96.8898	78.7655	105.643	147.729	113.332	155.304	191.585	201.995	198.726	94.3712	118.482	125.335	84.5254	87.1658	71.3521	113.783	105.012	97.72	277.826	178.903	203.059	173.378	118.477	173.483		138.035	0.565415	1.47981	0.201701	2.80324	0.00505924	0.0140589		138.035	-0.797514	0.57534	0.203234	-3.92412	8.70467e-05	0.000329771		138.035	0.38166	1.30284	0.212206	1.79854	0.0720916	0.429566
C24B5.2	spas-1	1855	1896.93	1418.08	1200.73	1266.13	1368.94	2196.08	2049.63	2329.3	9005	4196.42	4173.76	1346.64	1273.81	1330.28	1171.41	1303.38	1251.79	898.85	1084.74	1069.59	1068.1	1232.16	1029.4		1959.01	-0.430529	0.741989	0.211881	-2.03194	0.0421596	0.0834998		1959.01	1.40115	2.64112	0.211055	6.6388	3.16255e-11	9.782e-10		1959.01	-0.084336	0.943219	0.212485	-0.396903	0.691439	0.922751
C24B5.3	ptr-1	576.935	698.223	736.413	1166.38	1024.42	1188.34	734.887	788.834	708.918	438.743	591.334	588.963	1069.05	1032.12	886.526	988.608	1054.24	1044.63	748.701	542.371	599.404	780.202	660.087	782.765		809.629	0.747765	1.67919	0.145811	5.12831	2.92354e-07	2.48835e-06		809.629	-0.458128	0.72793	0.149641	-3.06152	0.00220216	0.00504632		809.629	0.0472722	1.03331	0.145643	0.324576	0.745502	0.938776
C24B5.4	C24B5.4	487.972	392.186	316.156	496.44	475.464	487.725	300.246	325.49	284.714	105.961	212.191	212.958	461.048	447.715	442.774	450.47	443.727	466.125	144.02	113.23	141.164	118.796	147.814	116.004		316.266	0.288196	1.22111	0.183782	1.56814	0.116848	0.193593		316.266	-0.757916	0.59135	0.195403	-3.87873	0.000105004	0.000385537		316.266	0.00936015	1.00651	0.18466	0.0506885	0.959574	0.998861
C24B9.3	C24B9.3	331.187	327.369	354.712	485.274	517.963	509.537	38.1265	28.7197	33.4395	19.8676	35.5447	23.2923	48.0258	63.3933	67.4424	92.3323	82.3622	87.948	870.251	721.275	624.379	1096.99	821.442	1073.3		348.091	0.577865	1.49264	0.161826	3.57091	0.000355737	0.00136903		348.091	-0.313475	0.804701	0.27422	-1.14315	0.252976	0.31207		348.091	0.556347	1.47054	0.20595	2.70137	0.00690548	0.137152
C24D10.4	C24D10.4	1752.82	1367.73	945.385	1076.19	1095.25	1145.59	738.7	734.267	856.052	3274.85	1604.89	1315.46	146.959	151.55	154.433	150.157	158.547	160.261	522.967	632.955	600.49	612.175	690.552	597.786		853.584	-0.293422	0.815964	0.240559	-1.21975	0.222558	0.325267		853.584	1.4096	2.65663	0.241212	5.84381	5.10204e-09	7.31999e-08		853.584	0.0500231	1.03528	0.256384	0.19511	0.845307	0.967903
C24F3.1	tram-1	5427.59	5296.98	4476.31	5038.26	5491.29	5263.76	7998.93	7787.82	7815.3	21890.8	11555.2	11236.9	5835.14	6107.55	6395.3	5320.76	6613.69	6106.52	8189.75	9467.15	9226.7	6979.01	8244.88	6764.8		7688.77	0.0551933	1.039	0.186675	0.295665	0.767486	0.838497		7688.77	0.920471	1.89273	0.18645	4.93682	7.94049e-07	5.78336e-06		7688.77	-0.0235886	0.983783	0.186664	-0.126369	0.89944	0.982817
C24F3.3	nas-12	106.579	72.2017	80.9669	70.4292	63.7493	88.122	96.2693	60.3113	96.4969	39.7353	62.4724	51.0213	301.602	283.289	282.476	437.412	379.896	364.496	105.206	58.8796	85.7843	48.1606	32.7223	31.3524		137.485	-0.221878	0.857448	0.230735	-0.961613	0.336244	0.452236		137.485	-0.702766	0.614393	0.251266	-2.7969	0.0051596	0.0104287		137.485	0.446497	1.36273	0.206229	2.16506	0.0303831	0.293949
C24F3.4	qns-1	870.247	932.058	707.111	637.298	615.358	670.076	378.405	375.271	343.949	754.97	428.69	464.737	281.431	282.298	291.273	235.96	293.415	249.186	932.557	1031.52	980.547	1061.67	1167.85	949.977		622.328	-0.38389	0.766368	0.168105	-2.28363	0.0223931	0.0493139		622.328	0.578142	1.49293	0.173384	3.33446	0.000854665	0.00227737		622.328	-0.135988	0.910047	0.177842	-0.764653	0.444478	0.818907
C24G6.1	syp-2	1152.99	744.99	421.028	156.318	154.946	157.049	64.815	51.6954	60.1912	360.929	138.947	120.898	258.379	226.829	306.912	346.013	357.246	330.294	313.576	523.122	307.303	358.529	517.914	353.237		324.34	-2.30752	0.202007	0.327148	-7.05344	1.74545e-12	4.73883e-11		324.34	1.80058	3.48361	0.343478	5.24221	1.58668e-07	1.42961e-06		324.34	0.383755	1.30473	0.327028	1.17346	0.240611	0.671138
C24G6.2	hir-1	342.638	472.593	654.675	628.709	548.952	610.747	729.169	880.737	700.319	261.59	511.628	450.318	688.69	729.023	735.025	817.001	685.666	862.868	783.43	588.796	614.606	728.831	459.24	837.109		638.432	0.282158	1.21601	0.238407	1.18351	0.236606	0.342294		638.432	-0.9114	0.531669	0.240168	-3.79484	0.000147738	0.000517697		638.432	0.136134	1.09896	0.237618	0.572911	0.566705	0.876037
C24G6.3	mms-19	933.666	1106	1032.52	1024.66	919.938	921.355	812.094	833.828	814.014	889.076	764.749	787.503	689.651	714.165	715.476	512.957	656.839	557.004	758.916	799.403	736.225	856.189	895.913	817.252		814.558	-0.100485	0.932719	0.107844	-0.931759	0.351461	0.468384		814.558	-0.0142897	0.990144	0.111057	-0.12867	0.897618	0.917654		814.558	-0.296547	0.814199	0.112157	-2.64404	0.00819225	0.14941
C24G6.4	nhr-47	864.962	887.752	813.525	668.218	572.858	624.707	1997.83	2006.55	2032.17	3745.05	2289.94	2444.59	2231.28	2233.62	2004.7	1797.21	1898.45	1767.76	1598.52	1990.58	1803.64	1875.05	2207.06	1960.57		1763.19	-0.459679	0.727148	0.153534	-2.99398	0.00275365	0.00828322		1763.19	0.48835	1.40284	0.150251	3.25024	0.00115309	0.00294346		1763.19	-0.24392	0.844448	0.150395	-1.62186	0.104834	0.501812
C24G6.6	hpo-15	123.314	145.224	175.814	167.484	126.613	118.659	652.916	566.735	688.854	5892.41	2398.73	1896.66	207.472	164.426	189.621	250.883	156.488	215.961	584.253	783.551	585.288	510.503	520.171	526.72		735.364	-0.107201	0.928387	0.294227	-0.364348	0.715598	0.79882		735.364	2.4153	5.33429	0.282168	8.55977	1.13093e-17	4.75325e-15		735.364	0.151362	1.11062	0.291895	0.518549	0.604075	0.889235
C24G6.7	grl-1	319.736	299.473	488.886	867.481	802.179	806.186	488.972	457.6	591.402	271.524	413.611	322.765	410.141	471.488	505.329	360.935	393.28	446.581	754.83	543.504	611.349	558.663	339.634	603.011		505.357	1.15893	2.23291	0.214146	5.41184	6.23789e-08	6.11379e-07		505.357	-0.605202	0.657379	0.217935	-2.77698	0.00548662	0.0109932		505.357	-0.20799	0.865743	0.216199	-0.962031	0.336034	0.745864
C24G6.8	C24G6.8	2145.67	1754.99	1327.09	1696.31	1714.15	1848.82	1750.96	1616.92	1683.44	3134.12	2000.19	2064.14	1094.03	1082.64	1112.31	1022.18	1087.18	1087.62	3279.78	4580.15	4153.48	3925.63	4692.82	3957.72		2242.18	0.00898853	1.00625	0.176809	0.0508376	0.959455	0.975186		2242.18	0.509496	1.42355	0.177065	2.87745	0.00400897	0.00843715		2242.18	-0.0409848	0.971991	0.178448	-0.229674	0.818345	0.963325
C24H10.1	clc-7	799.781	557.922	414.088	389.937	439.162	454.57	616.695	679.699	642.994	430.465	570.869	588.963	819.32	788.454	688.108	892.545	891.571	829.643	870.251	755.244	819.837	893.648	916.223	831.883		690.911	-0.463695	0.725127	0.177423	-2.61349	0.00896221	0.0228165		690.911	-0.282296	0.822281	0.178284	-1.5834	0.113329	0.154559		690.911	0.187052	1.13843	0.175388	1.0665	0.286197	0.706599
C24H10.2	C24H10.2	894.91	769.604	631.542	564.292	556.921	531.35	57.1897	63.1833	64.9682	208.61	101.248	74.3136	170.972	136.692	138.795	135.234	155.459	162.215	915.193	820.917	854.585	795.186	939.919	751.412		437.28	-0.474088	0.719922	0.214563	-2.20955	0.0271364	0.0579913		437.28	1.02043	2.02852	0.248873	4.10019	4.12812e-05	0.000174839		437.28	0.0198735	1.01387	0.230747	0.0861265	0.931366	0.991097
C24H10.3	C24H10.3	427.196	333.112	192.778	80.7359	75.2596	103.827	21.9227	30.6343	24.8408	6.62254	21.5422	24.4015	387.088	314.986	338.19	503.631	309.888	394.789	467.811	397.437	461.498	313.579	453.598	372.048		252.392	-1.87363	0.272887	0.258365	-7.25186	4.1109e-13	1.27954e-11		252.392	-0.485368	0.714315	0.361507	-1.34262	0.179394	0.230742		252.392	0.216567	1.16197	0.248202	0.872544	0.382911	0.781618
C24H10.5	cal-5	339.114	383.161	494.284	442.329	464.839	380.408	259.26	246.032	245.542	132.451	218.653	196.321	413.983	389.275	387.061	452.335	447.845	473.942	441.254	259.297	297.53	250.435	178.28	270.676		336.013	0.0809592	1.05772	0.198187	0.408499	0.682907	0.773029		336.013	-0.443956	0.735116	0.20951	-2.11902	0.0340886	0.0534013		336.013	0.207144	1.1544	0.199123	1.04028	0.29821	0.71826
C24H11.6	immp-1	662.374	443.876	230.563	197.545	216.925	180.606	391.749	441.326	450.956	379.141	344.675	366.022	143.117	130.749	120.223	207.048	177.079	155.375	321.748	407.628	423.492	465.553	491.962	414.897		323.526	-1.16628	0.445569	0.238819	-4.88353	1.04204e-06	7.7055e-06		323.526	-0.237365	0.848294	0.238089	-0.996959	0.318784	0.381782		323.526	0.453445	1.36931	0.248259	1.8265	0.0677744	0.41773
C24H11.8	twk-39	70.4653	98.4568	218.996	132.269	134.582	117.787	141.068	150.3	152.866	71.1923	96.94	96.4968	19.2103	33.6777	24.4357	29.8448	29.8563	39.088	232.884	131.347	155.28	144.482	117.349	152.582		107.977	-0.0159181	0.989027	0.295271	-0.05391	0.957007	0.973363		107.977	-0.739276	0.59904	0.304076	-2.43122	0.0150481	0.0263249		107.977	0.355187	1.27915	0.353539	1.00466	0.31506	0.730047
C24H11.9	mdt-21	276.576	294.55	271.432	290.306	288.643	275.708	264.026	254.648	308.599	539.737	290.82	361.586	65.3151	51.5071	43.0068	93.2649	48.3878	87.948	274.762	369.13	322.505	375.653	591.257	428.483		269.494	0.020608	1.01439	0.225059	0.091567	0.927042	0.955244		269.494	0.520424	1.43438	0.226127	2.30147	0.0213652	0.0356503		269.494	0.525759	1.43969	0.260865	2.01544	0.0438586	0.34807
C24H12.4	C24H12.4	1980.08	2109.44	1808.26	1519.38	1583.99	1674.32	2905.24	2763.79	2697.14	4248.36	2865.11	3208.8	353.47	338.758	321.573	331.09	355.187	383.062	2141.92	2859.06	2633.25	2827.57	3283.51	2854.11		2001.94	-0.303794	0.810119	0.141683	-2.14418	0.0320186	0.0664212		2001.94	0.301823	1.2327	0.141064	2.13961	0.0323859	0.0510585		2001.94	0.0766398	1.05456	0.152689	0.501933	0.615715	0.89434
C24H12.5	dnsn-1	1229.62	1256.14	1031.75	1207.6	1288.27	1232.84	931.239	828.084	930.574	4521.54	1861.25	1988.72	537.889	529.928	642.169	528.812	568.299	501.304	1057.17	2107.21	1511.54	1928.57	2358.26	1925.04		1354.33	0.0841899	1.06009	0.253367	0.332284	0.739675	0.816992		1354.33	1.63662	3.10937	0.253531	6.45531	1.07996e-10	2.71366e-09		1354.33	-0.097415	0.934706	0.25629	-0.380097	0.703873	0.926098
C25A1.1	C25A1.1	4186.52	3492.76	2518.46	3504.28	3520.38	3360.85	1212.42	1160.28	1194.27	2615.9	1470.26	1535.08	1142.05	1064.81	1228.63	1107.99	1250.88	1317.27	494.368	586.531	496.246	645.353	874.474	723.195		1695.97	0.0264618	1.01851	0.194829	0.135821	0.891963	0.929967		1695.97	0.654129	1.57367	0.196589	3.3274	0.000876613	0.002331		1695.97	0.0975838	1.06998	0.196879	0.495653	0.620139	0.89619
C25A1.10	dao-5	6804.31	8169.45	9762.29	9430.64	10116.7	9985.71	7149.66	7285.23	7336.63	15543.1	8988.49	10094.5	12653.8	12592.5	12425	10339.3	9131.91	5914.99	5958.97	8617.93	7993.14	7759.22	7658.14	7365.72		9128.22	0.255672	1.19389	0.201472	1.26902	0.204434	0.303429		9128.22	0.669135	1.59012	0.201565	3.3197	0.000901142	0.00238469		9128.22	-0.56941	0.673892	0.201481	-2.82613	0.00471142	0.10898
C25A1.11	aha-1	1484.18	1450.6	1227.61	1089.93	1044.78	1088.87	1024.65	1058.8	952.549	683.777	821.835	891.763	1411	1441.21	1249.15	1370.99	1369.27	1368.08	1866.14	1726.76	1915.49	1796.93	1993.8	1860.24		1341.18	-0.368317	0.774686	0.110065	-3.34635	0.000818838	0.00288415		1341.18	-0.335871	0.792306	0.113553	-2.95782	0.0030982	0.00674692		1341.18	0.0024656	1.00171	0.11014	0.0223861	0.98214	1
C25A1.12	lid-1	2084.01	1701.66	1216.05	1180.98	1259.05	1208.41	681.51	636.62	659.236	2084.45	1094.34	1024.86	542.692	555.682	677.357	725.601	696.99	649.838	232.884	327.235	345.309	297.526	412.977	312.479		858.656	-0.454937	0.729542	0.227907	-1.99615	0.0459171	0.0898651		858.656	1.08558	2.12222	0.229654	4.72701	2.27853e-06	1.46668e-05		858.656	0.222956	1.16712	0.230714	0.966373	0.333857	0.745516
C25A1.13	mrpl-34	2298.93	1593.36	1075.7	937.051	848.22	834.978	1457.38	1437.9	1481.85	1533.12	1330.23	1423.05	437.995	406.113	372.399	443.008	409.752	424.105	550.546	842.431	694.961	703.145	880.116	706.474		963.451	-0.922509	0.527591	0.197588	-4.66885	3.0289e-06	2.01718e-05		963.451	-0.0307189	0.978932	0.197682	-0.155396	0.876509	0.900325		963.451	0.0699505	1.04968	0.203149	0.34433	0.730598	0.933603
C25A1.3	tag-72	1455.11	1158.51	866.731	505.029	567.546	526.115	650.056	633.748	684.077	1142.39	650.575	864.035	802.031	748.834	851.338	911.198	949.225	799.35	249.227	387.246	360.511	381.004	445.7	428.483		709.086	-1.12197	0.459466	0.19638	-5.71327	1.10826e-08	1.26253e-07		709.086	0.429935	1.34717	0.197357	2.17846	0.0293717	0.0469277		709.086	0.146878	1.10717	0.196338	0.748086	0.454408	0.824303
C25A1.4	sup-46	4502.73	4625.01	3372.85	3995.57	4307.51	3973.34	2876.64	2770.49	2753.51	7008.3	3800.05	4128.29	4280.06	4403.85	4602.7	4098.99	4983.94	4354.4	1377.9	2086.83	1920.92	2151.18	2586.19	2106.88		3627.84	-0.026051	0.982105	0.194355	-0.134038	0.893372	0.931175		3627.84	0.829468	1.77703	0.194689	4.26048	2.03992e-05	9.53875e-05		3627.84	0.0162379	1.01132	0.194405	0.0835259	0.933433	0.991732
C25A1.7	iars-2	3560.26	2929.91	2406.64	2013.24	1905.4	1997.14	784.452	839.572	768.154	1051.33	785.214	870.689	493.705	531.91	470.142	317.101	345.921	314.658	670.052	805.065	749.255	757.727	762.767	759.773		1120.42	-0.588443	0.66506	0.135423	-4.34522	1.39138e-05	7.65566e-05		1120.42	0.175014	1.12898	0.140192	1.24839	0.211888	0.267103		1120.42	-0.613783	0.653481	0.14589	-4.20716	2.58601e-05	0.00202268
C25A1.9	rsa-1	4305.43	3709.36	2693.5	2443.55	2426.02	2597.42	946.489	883.609	1016.56	4420.55	2027.12	1791.29	930.74	900.383	950.058	1155.55	1123.22	993.813	1121.52	1806.02	1490.91	1783.01	2068.27	1696.16		1886.69	-0.520053	0.697346	0.243872	-2.13248	0.032967	0.0680093		1886.69	1.5318	2.89146	0.245137	6.24874	4.13774e-10	8.56933e-09		1886.69	0.234736	1.17669	0.245813	0.954939	0.339609	0.749451
C25A11.2	C25A11.2	565.484	680.173	713.28	548.832	572.858	561.014	1112.34	1112.41	1144.59	1084.44	890.771	958.313	605.125	582.426	516.081	385.184	539.473	429.968	817.137	1168.53	1263.96	1252.18	1433.01	1098.38		834.831	-0.219797	0.858686	0.163984	-1.34036	0.18013	0.274504		834.831	-0.201409	0.869701	0.162585	-1.2388	0.215421	0.270983		834.831	-0.331639	0.794633	0.166239	-1.99496	0.0460475	0.352762
C25A11.4	ajm-1	7275.54	10441.3	17454.1	16343.9	21768.6	21358.7	18953.6	20927.1	18434.7	8857.65	14367.6	14639.8	18446.7	20745.5	18510.5	14708.8	15010.5	12363.5	3222.58	2539.75	2975.3	2838.27	2193.52	2363.97		12780.9	0.757751	1.69085	0.232835	3.25445	0.00113614	0.00383646		12780.9	-0.62285	0.649387	0.23289	-2.67444	0.00748538	0.014381		12780.9	-0.455406	0.729305	0.232845	-1.95583	0.0504849	0.362717
C25A8.4	cht-3	0	0.820473	1.54223	1.71778	0.885407	0	4.76581	1.91465	0.955415	1.65564	5.38555	3.32748	878.873	926.137	933.442	851.509	876.128	916.614	14.2999	18.1168	22.8034	28.8964	28.2088	35.5327		231.397	0.0866502	1.0619	1.18645	0.0730332	0.94178	0.964576		231.397	0.534288	1.44823	0.715465	0.746771	0.455202	0.52072		231.397	-0.050516	0.965591	0.145333	-0.347587	0.72815	0.932698
C25B8.1	kqt-1	400.772	488.182	669.326	828.831	738.429	829.743	2511.58	2622.11	2519.43	2500.01	2673.39	2581.01	609.928	627.99	480.894	717.207	740.231	706.516	109.292	104.172	98.8148	123.077	103.809	136.905		996.735	0.619856	1.53672	0.155104	3.99638	6.43188e-05	0.00030207		996.735	0.0191839	1.01339	0.151009	0.127038	0.89891	0.918712		996.735	0.332203	1.25893	0.155965	2.12999	0.0331725	0.306508
C25B8.3	cpr-6	977.706	1014.11	896.805	1361.34	1423.73	1469.28	1404.01	1568.09	1529.62	859.275	1350.7	1286.62	1104.59	1368.9	1185.62	1200.32	1121.16	1203.91	909.064	829.975	877.389	1438.4	1452.19	1510.14		1222.62	0.558709	1.47295	0.136088	4.10551	4.03423e-05	0.000198878		1222.62	-0.360116	0.779102	0.136742	-2.63354	0.00845001	0.0159723		1222.62	-0.053516	0.963585	0.136503	-0.392051	0.69502	0.922781
C25B8.6	nhr-120	117.149	126.353	154.223	158.036	145.207	181.479	140.115	184.763	160.51	109.272	142.179	151.955	276.629	267.441	289.318	290.987	254.293	271.662	158.32	151.728	159.624	129.499	130.889	137.951		178.732	0.282581	1.21637	0.157825	1.79047	0.0733787	0.132363		178.732	-0.250873	0.840388	0.16547	-1.51612	0.129489	0.173616		178.732	-0.0280704	0.980731	0.147635	-0.190133	0.849205	0.968714
C25D7.15	C25D7.15	119.791	77.945	81.738	75.5825	68.1763	55.8397	81.0187	89.9883	90.7644	115.894	114.174	86.5144	88.3675	97.071	80.149	118.446	93.687	99.6744	88.8636	39.6305	66.2385	48.1606	48.5192	45.9835		82.1758	-0.482057	0.715956	0.231492	-2.08239	0.0373067	0.0753939		82.1758	0.268744	1.20476	0.233	1.15341	0.248743	0.307456		82.1758	0.233073	1.17534	0.229193	1.01693	0.309188	0.727078
C25D7.3	sdc-3	948.639	1428.44	1879.2	1458.4	1576.02	1765.93	5897.21	6005.29	5628.35	3346.04	3388.59	4106.11	2279.31	2410.93	2009.59	1522.08	1548.41	1314.33	912.129	1187.78	1366.03	1177.26	1319.05	1167.35		2318.44	0.173058	1.12745	0.188648	0.917361	0.358954	0.475982		2318.44	-0.693233	0.618466	0.187526	-3.69673	0.000218398	0.000715727		2318.44	-0.611613	0.654465	0.188614	-3.24267	0.00118417	0.0423787
C25D7.5	C25D7.5	69.5845	69.7402	97.1603	86.7481	77.0304	82.887	153.459	149.342	122.293	62.9141	107.711	109.807	92.2096	74.289	79.1715	89.5343	67.9488	115.31	228.798	191.359	180.256	145.552	95.9101	135.86		111.87	0.0580527	1.04106	0.229473	0.252982	0.800282	0.862797		111.87	-0.578624	0.669602	0.227995	-2.53788	0.0111526	0.020302		111.87	0.152291	1.11133	0.231942	0.656589	0.511446	0.852821
C25D7.6	mcm-3	6365.66	7196.37	6495.09	6327.46	7008.88	6528.01	4168.17	3462.64	4141.72	13675.5	6651.16	6892.31	5296.29	5088.3	5792.23	4331.22	5088.96	4471.67	2227.72	4209.89	2816.77	3299.54	4085.77	3156.14		5365.73	-0.0139385	0.990385	0.227791	-0.0611899	0.951208	0.97025		5365.73	1.20878	2.31143	0.227988	5.30196	1.14568e-07	1.07427e-06		5365.73	-0.219713	0.858736	0.228	-0.963652	0.335221	0.745623
C25D7.7	rap-2	2435.46	1857.55	1499.04	2459.01	2451.69	2307.75	1858.66	1884.97	1928.03	2281.47	1639.36	1834.55	1762.55	1491.72	1534.56	2247.68	1972.58	1985.67	2499.42	3544.1	2927.52	3158.27	3636.68	3101.8		2262.5	0.317952	1.24656	0.16572	1.9186	0.0550344	0.104921		2262.5	0.0197935	1.01381	0.16652	0.118866	0.905382	0.923872		2262.5	0.374008	1.29595	0.166338	2.24848	0.0245453	0.271862
C25D7.8	otub-1	1121.28	909.085	528.984	506.746	575.515	506.047	1288.67	1144.96	1369.11	6615.92	3042.84	2731.86	1874.93	1781.95	2494.39	1727.27	2120.83	1964.17	1911.08	3043.62	2376.98	2297.8	2845.71	2234.38		1958.92	-0.687921	0.620748	0.274985	-2.50167	0.012361	0.03006		1958.92	1.7034	3.25667	0.273023	6.23904	4.40256e-10	9.03917e-09		1958.92	-0.0818291	0.944859	0.272918	-0.29983	0.764307	0.945072
C25E10.12	C25E10.12	370.824	296.191	276.83	395.09	353.277	360.34	655.775	656.723	671.657	264.902	413.611	417.044	566.705	543.796	555.178	547.465	467.406	443.649	642.474	446.126	461.498	312.509	275.318	312.479		446.119	0.233554	1.17573	0.171134	1.36474	0.172334	0.264822		446.119	-0.847958	0.555571	0.170984	-4.95929	7.07503e-07	5.21793e-06		446.119	-0.191265	0.875838	0.168667	-1.13398	0.256804	0.688681
C25E10.2	cyp-33B1	14.9739	11.4866	10.7956	16.319	14.1665	9.59745	0	1.91465	1.91083	0	1.07711	0	2.88155	0.990521	2.93228	3.7306	5.14764	4.886	2.04284	1.1323	2.17175	2.14047	2.25671	2.09016		4.77685	0.110198	1.07938	0.488823	0.225436	0.82164	0.877683		4.77685	-1.50212	0.353035	1.43365	-1.04776	0.294751	NA		4.77685	1.00684	2.00951	0.770475	1.30678	0.191287	0.619947
C25E10.7	C25E10.7	0	0	0	0.858892	3.54163	0	44.7986	43.0795	47.7708	4.96691	36.6218	26.6198	0.960516	2.97156	1.95485	2.79795	1.02953	1.9544	9.19279	5.6615	5.42939	3.21071	1.12835	3.13524		10.3202	3.26572	9.61786	1.40619	2.32239	0.020212	0.0454251		10.3202	-0.943938	0.519812	0.475551	-1.98493	0.0471518	0.0711058		10.3202	-0.00257617	0.998216	0.932061	-0.00276395	0.997795	1
C25F6.1	C25F6.1	1567.85	1208.56	727.931	872.634	849.991	852.428	307.871	242.203	283.758	635.764	394.223	418.153	129.67	125.796	163.23	219.173	181.197	165.147	368.733	480.095	535.337	517.995	649.932	527.765		517.726	-0.444099	0.735043	0.226889	-1.95734	0.0503074	0.0970029		517.726	0.791785	1.73122	0.233473	3.39134	0.000695515	0.00190986		517.726	0.434231	1.35119	0.242364	1.79165	0.0731888	0.43243
C25F6.2	dlg-1	5993.08	8460.72	12272.3	17705.2	18693.6	18491.7	22530.8	24606.1	21505.4	13935.5	18257	18498.5	15734.2	16964.6	15652.5	14795.5	16569.2	14625.8	17066.9	14922.6	16703	19873.2	19133.5	19685.1		16778.2	1.03822	2.05369	0.176896	5.86906	4.38277e-09	5.526e-08		16778.2	-0.437244	0.738544	0.176852	-2.47237	0.0134221	0.0239213		16778.2	-0.0722267	0.951169	0.176866	-0.408371	0.683002	0.919435
C25F6.3	dpyd-1	2208.21	2755.97	2661.11	2452.14	2565.02	2370.57	1819.59	1997.93	1887.9	1506.63	1670.6	1710.32	3180.27	3167.68	2891.23	2616.08	2768.4	2551.47	2429.96	2110.61	2078.37	2076.26	1980.26	2056.72		2313.05	-0.0459304	0.968665	0.102801	-0.446787	0.655029	0.751389		2313.05	-0.221705	0.857552	0.104826	-2.11497	0.0344323	0.0538688		2313.05	-0.219435	0.858902	0.102832	-2.13392	0.0328491	0.304841
C25F6.4	ddr-1	655.328	785.193	1071.08	1015.21	1035.93	1001.62	2786.09	3294.15	2651.28	1488.42	2127.29	2246.05	1331.28	1404.56	1279.45	1347.68	1424.87	1331.92	1970.32	1652.02	1692.88	1503.68	1506.35	1610.47		1592.21	0.280722	1.2148	0.165322	1.69803	0.0895012	0.155961		1592.21	-0.573223	0.672114	0.163509	-3.50575	0.000455326	0.00133551		1592.21	0.0316555	1.02218	0.16449	0.192447	0.847392	0.968244
C25F6.7	C25F6.7	827.087	749.092	734.1	1095.95	1159.88	1149.95	3666.81	3991.08	3457.65	1711.93	2948.05	2582.12	1395.63	1353.05	1381.1	1406.43	1286.91	1347.56	3359.45	2651.85	2779.85	2446.56	2415.81	2650.32		2022.84	0.560149	1.47442	0.152127	3.68213	0.000231296	0.000938174		2022.84	-0.616079	0.652442	0.149709	-4.11517	3.86888e-05	0.000165429		2022.84	-0.0313052	0.978535	0.151207	-0.207035	0.835982	0.966843
C25F6.8	C25F6.8	15.8547	20.5118	18.5067	11.1656	4.42704	6.10747	7.62529	9.57323	7.64332	4.96691	2.15422	1.10916	22.0919	14.8578	7.81941	8.39384	11.3248	12.7036	24.5141	11.323	14.1164	9.63213	2.25671	9.40572		10.7535	-1.33609	0.396093	0.479659	-2.7855	0.00534461	0.0147434		10.7535	-1.72803	0.301864	0.734371	-2.35307	0.018619	0.0316143		10.7535	-0.470548	0.72169	0.473045	-0.994722	0.319871	0.734745
C25G4.2	C25G4.2	1005.89	818.012	440.306	472.391	452.443	492.96	335.513	338.892	349.682	518.214	358.678	427.026	205.551	160.464	155.411	287.256	211.053	184.691	77.628	110.965	114.017	135.92	179.408	137.951		332.097	-0.674686	0.626469	0.234409	-2.87824	0.00399896	0.0114681		332.097	0.345554	1.27064	0.238522	1.44873	0.147413	0.194581		332.097	0.389937	1.31034	0.244517	1.59472	0.110774	0.514002
C25G4.3	C25G4.3	613.929	431.569	280.685	149.447	157.602	155.304	233.525	196.251	249.363	399.008	254.198	301.691	374.601	299.137	271.725	393.578	357.246	382.085	83.7565	138.141	112.931	140.201	230.184	148.401		264.773	-1.51918	0.348884	0.246645	-6.1594	7.30231e-10	1.12468e-08		264.773	0.486693	1.40123	0.24765	1.96525	0.0493855	0.0740369		264.773	0.260943	1.19826	0.244051	1.06921	0.284973	0.706565
C25G4.4	spe-44	133.884	105.021	67.0869	67.8525	62.8639	60.2022	690.089	485.363	750.001	4610.94	1790.16	1570.57	97.0122	73.2985	116.314	95.1302	84.4213	77.1988	96.0136	137.008	107.502	115.586	132.017	95.1023		484.193	-0.678132	0.624974	0.325222	-2.08513	0.0370573	0.0749508		484.193	2.04854	4.13688	0.30334	6.75328	1.44544e-11	5.10745e-10		484.193	-0.158597	0.895896	0.325076	-0.487879	0.625636	0.896368
C25G4.5	dpy-26	3521.5	4105.65	4179.43	4417.28	4759.06	4951.41	5664.64	5585.02	5518.48	9764.94	6167.54	6710.41	4487.53	4694.08	4580.22	3572.05	3943.09	3274.6	3044.86	4626.58	4239.26	4920.95	5168.99	4861.71		4864.97	0.258873	1.19654	0.160809	1.60982	0.107438	0.181313		4864.97	0.432765	1.34982	0.160692	2.69313	0.00707848	0.0137136		4864.97	-0.351047	0.784015	0.161004	-2.18036	0.0292309	0.290299
C25G6.2	tsp-9	1035.84	916.469	710.966	496.44	511.765	500.812	849.267	843.401	838.855	475.167	582.717	608.928	734.795	725.061	643.147	951.302	729.935	881.435	1543.37	1954.35	2025.16	1705.96	2120.18	1742.15		1005.31	-0.818984	0.566841	0.155924	-5.25245	1.5009e-07	1.34683e-06		1005.31	-0.599221	0.66011	0.157598	-3.80221	0.000143409	0.000505006		1005.31	0.285595	1.21891	0.155649	1.83487	0.0665253	0.412985
C25G6.3	C25G6.3	28.1861	46.767	80.9669	60.1224	54.0098	44.4973	42.8923	48.8235	60.1912	14.9007	32.3133	24.4015	24.0129	18.8199	30.3002	15.855	15.4429	17.5896	75.5851	61.1442	58.6374	38.5285	34.979	62.7048		41.3196	0.0177988	1.01241	0.311957	0.0570552	0.954501	0.97216		41.3196	-1.04773	0.48373	0.351544	-2.98035	0.00287917	0.00633168		41.3196	-0.581253	0.668383	0.379963	-1.52976	0.126075	0.538631
C25G6.5	npr-11	81.9159	73.0221	74.798	166.625	139.894	132.619	4.76581	3.82929	3.82166	0	3.23133	3.32748	24.0129	11.8862	10.7517	21.4509	17.502	27.3616	9.19279	4.5292	4.34351	10.7024	0	7.31556		34.8708	0.93555	1.91262	0.25623	3.65122	0.000260999	0.00103994		34.8708	-0.757804	0.591396	0.751197	-1.00879	0.313073	0.375698		34.8708	0.506095	1.4202	0.357999	1.41367	0.157457	0.581894
C25H3.11	C25H3.11	569.007	1121.59	2170.68	1474.72	1470.66	1566.13	1706.16	1664.78	1815.29	3399.02	2153.14	2134.02	1148.78	1220.32	1297.04	675.238	862.744	678.177	1760.93	2205.72	1806.9	2125.49	2003.96	2101.66		1630.51	0.224081	1.16803	0.278686	0.804062	0.421361	0.537521		1630.51	0.566963	1.4814	0.278477	2.03594	0.0417561	0.0638859		1630.51	-0.72634	0.604436	0.27981	-2.59583	0.00943628	0.165583
C25H3.4	eif-2D	753.098	758.938	589.131	408.833	376.298	413.563	267.838	298.685	255.096	839.407	426.536	440.336	203.629	213.952	285.409	161.348	249.146	190.554	929.493	1350.83	1076.1	1045.62	1137.38	1098.38		573.734	-0.809445	0.570601	0.220347	-3.6735	0.000239249	0.000967269		573.734	1.04797	2.06762	0.224068	4.677	2.91106e-06	1.79616e-05		573.734	-0.227311	0.854225	0.229145	-0.991998	0.321199	0.735209
C25H3.7	C25H3.7	1648.01	1293.07	777.282	660.488	671.139	622.962	316.45	312.087	330.574	831.129	464.235	502.449	186.34	200.085	220.898	191.193	207.965	213.03	563.824	545.768	462.584	526.556	608.183	534.036		537.097	-0.927355	0.525821	0.215292	-4.30742	1.65168e-05	8.94893e-05		537.097	0.901412	1.86789	0.220267	4.09236	4.27004e-05	0.000180103		537.097	0.0113417	1.00789	0.227238	0.0499112	0.960193	0.998861
C25H3.9	C25H3.9	6503.07	4821.92	2947.2	2425.51	2511.01	2511.04	2240.88	2188.44	2231.85	3465.24	2463.35	2335.89	2711.54	2692.23	2588.23	2826.86	2560.44	2800.66	1532.13	1567.1	1527.83	1441.61	1501.84	1554.03		2581.25	-0.938211	0.52188	0.191107	-4.90934	9.13819e-07	6.84582e-06		2581.25	0.3102	1.23988	0.191778	1.61749	0.105772	0.145168		2581.25	0.0349775	1.02454	0.191471	0.182677	0.855051	0.969679
C26B2.3	nhr-31	1549.36	1613.87	1900.79	3530.05	3204.29	3442.87	3829.8	3730.69	3167.2	2066.23	3165.63	3072.37	3946.76	4287.96	4286.01	5323.56	5698.44	6078.19	1581.16	1323.66	1398.61	1671.71	1421.73	1654.36		3039.39	1.00679	2.00944	0.146366	6.87861	6.04414e-12	1.44573e-10		3039.39	-0.36783	0.774947	0.146327	-2.51376	0.0119452	0.0215853		3039.39	0.449685	1.36574	0.145559	3.08937	0.00200582	0.0626263
C26B2.4	nhr-258	19.378	20.5118	16.9645	19.7545	23.906	21.8124	22.8759	21.0611	13.3758	18.212	16.1567	14.4191	40.3417	38.6303	43.9842	49.4304	35.004	38.1108	62.3067	27.1752	46.6927	43.8797	54.161	63.7499		32.1623	0.205067	1.15274	0.324462	0.632021	0.527373	0.637803		32.1623	-0.248029	0.842046	0.368482	-0.67311	0.500877	0.563674		32.1623	-0.00151435	0.998951	0.283691	-0.00533803	0.995741	1
C26B2.6	elpc-4	681.752	523.462	362.423	272.269	262.08	266.984	135.349	129.239	155.733	167.219	131.408	167.483	340.023	296.166	254.131	296.582	234.732	247.232	304.383	392.908	321.42	352.108	399.437	318.749		292.22	-0.966902	0.511604	0.193269	-5.00287	5.64817e-07	4.47939e-06		292.22	0.144867	1.10563	0.21071	0.687519	0.491756	0.555071		292.22	-0.19294	0.874821	0.19721	-0.97835	0.327901	0.7412
C26B2.7	C26B2.7	690.56	480.797	249.07	104.785	100.051	83.7595	122.958	96.6896	132.803	137.418	109.865	109.807	165.209	143.625	129.998	240.623	179.138	178.828	171.599	186.829	152.023	175.519	238.083	169.303		189.556	-2.298	0.203345	0.261073	-8.80212	1.34256e-18	1.31104e-16		189.556	0.012534	1.00873	0.271545	0.0461583	0.963184	0.97093		189.556	0.448459	1.36458	0.262096	1.71105	0.087072	0.465821
C26B2.8	C26B2.8	126.838	139.48	171.187	183.803	177.967	142.217	141.068	126.367	115.605	99.3381	115.251	75.4228	156.564	150.559	146.614	133.369	81.3327	118.241	253.312	137.008	182.427	113.445	82.3698	166.168		138.998	0.202854	1.15097	0.243085	0.834498	0.404001	0.52086		138.998	-0.402177	0.756715	0.25663	-1.56715	0.117081	0.158994		138.998	-0.444475	0.734852	0.249327	-1.7827	0.0746357	0.434836
C26B9.3	C26B9.3	3067	2052	1879.2	1726.37	1761.07	1781.64	3030.1	3069.18	2842.36	1021.53	2046.51	2122.93	3940.04	3886.8	3473.77	3686.76	3411.86	3482.74	3248.12	2421.99	3052.4	2244.29	2357.13	2445.49		2668.8	-0.409244	0.753018	0.206431	-1.98248	0.0474258	0.092332		2668.8	-0.78249	0.581363	0.206781	-3.78414	0.000154241	0.000534716		2668.8	-0.0948611	0.936362	0.205904	-0.460706	0.64501	0.905066
C26B9.5	C26B9.5	576.054	586.639	687.062	735.212	757.023	753.836	483.253	469.088	506.37	193.709	339.29	249.561	453.364	479.412	476.984	497.102	359.305	445.603	998.95	579.737	662.385	896.858	521.299	956.248		569.348	0.279846	1.21407	0.219281	1.2762	0.201884	0.300364		569.348	-0.891355	0.539107	0.226015	-3.94378	8.02065e-05	0.000308437		569.348	-0.114203	0.923893	0.222161	-0.514054	0.607214	0.889286
C26C6.1	pbrm-1	9337.54	12494.2	16305.2	18734.2	18588.2	18567.6	19984	19430.8	20352.3	37735.2	22118.5	27642.5	15355.8	15753.2	15441.4	12524.5	15040.4	11202.6	7738.28	12596.8	12855.7	13355.5	13345	11713.3		16592.2	0.551365	1.46547	0.20657	2.66915	0.00760445	0.0198978		16592.2	0.549779	1.46386	0.206537	2.6619	0.00777014	0.0148522		16592.2	-0.263956	0.832801	0.206615	-1.27752	0.201418	0.631436
C26C6.2	goa-1	6178.05	7341.6	8119.82	13471.7	14717.2	13964.3	11764.9	12310.2	11688.5	17867.6	12561.3	14054.1	6786.05	6968.31	6825.37	5930.72	7181.99	7029.98	13203.9	13271.7	13382.3	11712.7	12325	11507.4		10840.2	0.961889	1.94786	0.126032	7.6321	2.30956e-14	8.90197e-13		10840.2	0.314431	1.24352	0.126005	2.49539	0.012582	0.0225763		10840.2	-0.0310209	0.978727	0.12634	-0.245536	0.806041	0.960016
C26C6.3	nas-36	29.0669	26.2552	50.8935	30.0612	37.1871	39.2623	59.096	74.6712	52.5478	34.7683	38.776	45.4755	65.3151	51.5071	55.7133	74.6119	82.3622	96.7428	19.407	13.5876	24.9752	41.7392	31.5939	41.8032		46.5591	-0.00505914	0.996499	0.271996	-0.0186	0.98516	0.992095		46.5591	-0.634483	0.644171	0.270768	-2.34328	0.0191152	0.0323646		46.5591	0.555117	1.46929	0.246377	2.25312	0.0242515	0.271862
C26C6.5	dcp-66	4730.87	5949.25	7031.78	9059.59	8969.17	9045.16	12150.9	11522.3	12149.1	20723.6	12062.6	14664.2	8501.53	9283.16	8860.37	7946.17	8219.75	6548.22	5856.83	7508.28	7780.31	7369.65	7169.56	6401.11		9145.97	0.612105	1.52849	0.173773	3.52244	0.000427597	0.0016196		9145.97	0.405312	1.32438	0.173623	2.33444	0.0195727	0.0330062		9145.97	-0.230281	0.852469	0.173779	-1.32513	0.185127	0.613472
C26C6.9	C26C6.9	413.984	300.293	252.925	185.521	170.884	220.741	112.473	131.153	129.936	49.6691	74.3206	65.4404	374.601	306.071	338.19	411.298	296.504	360.587	464.746	346.484	385.486	318.931	327.223	350.102		266.148	-0.743101	0.597454	0.18808	-3.95099	7.78271e-05	0.000355723		266.148	-0.959235	0.514329	0.222224	-4.31652	1.58511e-05	7.74136e-05		266.148	0.069161	1.04911	0.18535	0.373137	0.709046	0.927221
C26D10.2	hel-1	21750	20300.2	15135.4	19084.6	19804.8	19085.8	31889	31830	31978.7	71703.9	42149.5	47809.2	15378.8	15349.1	15306.5	15392.4	17211.6	15991.9	19664.4	37399.8	31152.7	31533.5	38757.8	30416		27336.5	0.0198004	1.01382	0.201974	0.0980345	0.921905	0.951785		27336.5	0.756372	1.68924	0.201914	3.74601	0.000179668	0.000607825		27336.5	0.0781178	1.05564	0.202035	0.386655	0.699012	0.924098
C26D10.3	C26D10.3	95.1282	80.4064	62.4602	66.1347	45.1558	68.9271	169.663	161.788	145.223	221.855	140.024	166.374	506.192	526.957	530.743	641.663	641.396	581.434	37.7926	50.9535	60.8091	73.8463	62.0595	81.5162		217.438	-0.395607	0.760169	0.21186	-1.8673	0.0618595	0.115173		217.438	0.133629	1.09705	0.191853	0.696516	0.486106	0.550082		217.438	0.253662	1.19223	0.173174	1.46478	0.14298	0.562077
C26D10.4	C26D10.4	103.056	116.507	131.089	131.41	140.78	142.217	601.445	659.595	539.81	346.028	496.548	461.41	186.34	181.265	186.688	188.395	173.99	159.284	104.185	107.568	112.931	110.234	116.22	110.778		233.657	0.238065	1.17941	0.162568	1.4644	0.143085	0.228413		233.657	-0.457642	0.728175	0.142444	-3.21278	0.00131458	0.00327728		233.657	-0.0869992	0.941479	0.157292	-0.553107	0.58019	0.881314
C26D10.6	C26D10.6	246.629	322.446	427.197	374.477	353.277	383.025	295.48	321.66	310.51	152.318	257.429	217.395	1317.83	1414.46	1728.09	1124.77	1295.15	1522.48	1024.49	709.952	748.169	665.687	513.401	696.023		684.264	0.15561	1.11389	0.207186	0.751063	0.452615	0.567695		684.264	-0.554774	0.680764	0.214255	-2.58932	0.00961653	0.0178468		684.264	-0.17815	0.883836	0.201357	-0.884747	0.376293	0.777163
C26E1.3	ceh-79	28.1861	31.178	44.7246	64.4169	50.4682	56.7122	64.815	71.7992	37.2612	19.8676	47.3929	75.4228	48.0258	56.4597	55.7133	55.0263	57.6536	55.7004	131.763	146.067	130.305	143.412	127.504	129.59		72.061	0.715923	1.64253	0.280554	2.55182	0.0107161	0.0265634		72.061	-0.239806	0.846859	0.284562	-0.84272	0.399385	0.465743		72.061	0.0718997	1.0511	0.276647	0.259897	0.794943	0.954484
C26E6.11	mmab-1	1433.09	1015.75	521.273	426.869	521.505	485.98	354.576	322.618	381.211	564.572	412.533	379.332	475.456	442.763	553.223	628.606	671.252	592.183	205.306	207.211	251.923	286.823	314.811	299.938		489.533	-1.04956	0.483117	0.234973	-4.46671	7.94328e-06	4.6601e-05		489.533	0.354377	1.27843	0.239189	1.48157	0.138454	0.18439		489.533	0.362628	1.28577	0.236278	1.53475	0.124845	0.536811
C26E6.12	C26E6.12	1033.2	811.448	461.126	344.416	273.591	331.548	246.869	235.501	247.453	672.188	343.598	395.97	183.459	187.208	255.108	232.23	246.057	206.189	164.449	203.814	199.801	247.225	236.954	206.926		331.93	-1.27922	0.412019	0.243517	-5.2531	1.49562e-07	1.34457e-06		331.93	0.946189	1.92678	0.247506	3.82289	0.000131896	0.000470259		331.93	0.129237	1.09372	0.25074	0.515423	0.606257	0.889286
C26E6.2	flh-2	2099.87	2490.96	2613.3	3897.65	4007.35	4058.85	2916.67	3199.37	2700.96	1915.57	2555.98	2667.53	3301.29	3660.96	2890.25	3160.75	3808.22	3789.58	2127.62	1758.46	2016.47	1814.05	1860.66	1979.38		2803.82	0.731613	1.66049	0.139058	5.2612	1.4312e-07	1.29051e-06		2803.82	-0.303008	0.81056	0.139804	-2.16737	0.0302063	0.0480784		2803.82	0.126854	1.09191	0.13908	0.912096	0.361718	0.768978
C26E6.3	ntl-9	1494.75	1622.9	1697.22	1972.88	2098.41	1849.69	1312.5	1314.4	1256.37	2470.21	1497.18	1569.46	2343.66	2455.5	2498.3	2161.88	2589.26	2489.91	1349.3	1836.59	1601.67	1511.17	1645.14	1315.76		1831.42	0.298221	1.22963	0.162257	1.83795	0.0660691	0.121475		1831.42	0.509204	1.42326	0.163273	3.11873	0.00181632	0.00431293		1831.42	-0.0112774	0.992214	0.16194	-0.0696393	0.944481	0.995326
C26E6.4	rpb-2	2361.47	3047.24	3533.24	3011.28	3049.34	2988.3	3374.19	2972.49	3258.92	10236.8	4840.54	5252.98	3753.7	3863.03	4054.36	3060.95	3637.32	3070.36	2488.18	3318.77	3075.2	3370.17	3482.1	3207.35		3679.51	0.0170424	1.01188	0.208085	0.0819009	0.934726	0.960152		3679.51	1.08103	2.11554	0.207955	5.19837	2.01043e-07	1.73275e-06		3679.51	-0.25675	0.836971	0.208062	-1.234	0.217201	0.649486
C26E6.5	fsn-1	2278.67	2164.41	1409.6	1826.86	1861.13	1878.48	936.005	946.792	965.925	1988.42	1078.19	1142.43	692.532	656.715	761.415	653.787	773.176	740.718	577.103	858.283	764.457	814.45	930.892	792.17		1145.53	-0.0721393	0.951226	0.203873	-0.353845	0.723455	0.805131		1145.53	0.560528	1.47481	0.205612	2.72614	0.00640796	0.0125757		1145.53	0.0382721	1.02688	0.206998	0.184891	0.853315	0.96954
C26E6.6	mrps-18C	1160.04	1083.02	746.438	681.101	717.18	649.136	831.157	848.188	848.409	877.487	757.209	796.376	1196.8	1230.23	1226.67	1443.74	1349.71	1302.61	703.759	686.173	774.23	552.242	679.269	587.335		905.355	-0.545339	0.68523	0.138399	-3.94033	8.13691e-05	0.000369313		905.355	-0.0581974	0.960463	0.139903	-0.415982	0.677423	0.730264		905.355	0.164974	1.12115	0.136921	1.20488	0.22825	0.66122
C26E6.8	ula-1	1639.2	1716.43	1093.44	1104.54	1131.55	1081.89	1542.22	1404.39	1647.14	5139.09	2753.09	2771.79	651.23	667.611	716.454	609.02	738.172	664.496	1153.18	1988.32	1740.66	1954.25	2272.5	1907.27		1587	-0.423024	0.74586	0.221056	-1.91365	0.0556652	0.10596		1587	1.21403	2.31985	0.22049	5.50605	3.66982e-08	3.96748e-07		1587	-0.0170086	0.98828	0.223484	-0.0761064	0.939334	0.994243
C26E6.9	set-2	1692.93	2566.44	4234.95	3805.75	3919.7	3859.92	3064.41	2745.6	3111.79	6970.23	3830.21	4242.53	4569.18	4788.18	4295.79	3556.19	4027.51	3256.03	869.229	1221.75	1187.95	1189.03	1218.62	1080.61		3137.69	0.447532	1.36371	0.23975	1.86666	0.0619494	0.115268		3137.69	0.753169	1.68549	0.239837	3.14034	0.00168751	0.00404877		3137.69	-0.332923	0.793926	0.239705	-1.38889	0.164867	0.592481
C26F1.4	rps-30	12327.9	10308.4	7300.13	6505.25	7068.2	7185	7455.63	7681.56	8063.7	5105.98	6109.37	6115.9	9932.7	10016.1	9395.02	11706.6	10559.9	12376.2	9240.79	7649.81	8763.03	7882.29	8229.08	7728.36		8529.46	-0.528124	0.693456	0.146474	-3.60559	0.000311448	0.00121684		8529.46	-0.420456	0.747188	0.146796	-2.86421	0.0041805	0.00872106		8529.46	0.239507	1.18059	0.146417	1.63579	0.101884	0.494415
C26F1.6	frpr-3	16.7355	13.948	17.7356	18.8956	11.5103	20.0674	13.3443	12.4452	9.55415	13.2451	10.7711	6.65495	1299.58	1294.61	1224.72	1140.63	888.483	877.526	56.1781	41.8951	30.4046	38.5285	19.182	28.2172		296.036	0.060924	1.04313	0.321694	0.189385	0.849791	0.899231		296.036	-0.249824	0.840999	0.418645	-0.596745	0.550678	0.610772		296.036	-0.393559	0.76125	0.182984	-2.15078	0.0314938	0.298792
C26F1.7	hint-3	532.894	370.034	246.756	366.747	311.663	337.656	471.815	386.758	483.44	1617.56	934.932	718.735	416.864	359.559	522.923	636.999	644.485	641.043	391.204	401.966	401.775	367.091	428.774	323.975		513.152	-0.177023	0.884527	0.24997	-0.708175	0.478837	0.592493		513.152	1.28272	2.43297	0.247997	5.17233	2.31195e-07	1.94552e-06		513.152	0.565169	1.47956	0.248656	2.2729	0.0230324	0.264459
C26G2.1	syg-2	1293.92	1709.05	2738.22	2644.53	2459.66	2473.52	3718.28	4128.93	3504.46	1870.87	2802.64	2933.72	2777.81	3107.26	2642.96	2545.2	2838.41	2544.63	2617.9	2059.65	2480.14	2659.54	2395.49	2458.03		2641.87	0.400073	1.31957	0.202419	1.97646	0.0481025	0.093405		2641.87	-0.576526	0.670577	0.202386	-2.84865	0.00439056	0.00908765		2641.87	-0.105238	0.929651	0.202313	-0.520176	0.602941	0.888891
C26H9A.1	vha-7	549.63	649.815	537.466	499.875	457.755	472.892	447.033	529.4	492.994	415.564	409.302	445.882	662.756	715.156	640.214	739.591	723.758	648.861	1321.72	1212.69	1189.04	1049.9	895.913	1022.09		697.054	-0.279813	0.823698	0.116066	-2.41081	0.0159172	0.0371068		697.054	-0.208647	0.865348	0.121	-1.72435	0.0846438	0.119451		697.054	0.0658757	1.04672	0.114836	0.573653	0.566203	0.875796
C26H9A.2	wdfy-3	709.938	1382.5	2772.92	2292.38	1954.98	2125.4	2675.52	2850.91	2535.67	1630.8	1946.34	1990.94	4175.36	4287.96	4297.74	3208.31	3651.74	3298.05	1052.06	1092.67	1250.93	1319.6	1184.77	1323.07		2292.11	0.38898	1.30947	0.265798	1.46345	0.143346	0.228781		2292.11	-0.533633	0.690813	0.265962	-2.00642	0.044811	0.0679488		2292.11	-0.329136	0.796013	0.265275	-1.24073	0.214704	0.648849
C27A2.1	smc-5	2097.22	2440.91	1906.19	1726.37	1862.01	1907.27	1631.81	1475.23	1550.64	5091.08	2712.16	2822.81	1640.56	1592.76	1821.92	1445.61	1489.73	1392.51	327.876	579.737	510.362	557.593	560.792	535.081		1653.26	-0.229714	0.852804	0.201503	-1.14	0.254286	0.362798		1653.26	1.18877	2.27959	0.201705	5.89362	3.77815e-09	5.6593e-08		1653.26	-0.224153	0.856098	0.202188	-1.10863	0.267588	0.696389
C27A2.4	pho-12	29.0669	18.0504	16.1934	16.319	19.479	20.0674	44.7986	44.0369	36.3058	31.4571	25.8507	35.4931	24.9734	32.6872	38.1196	41.0366	24.7087	43.974	0	2.2646	1.08588	9.63213	4.51341	14.6311		23.9477	-0.171578	0.887871	0.343967	-0.498823	0.617904	0.718329		23.9477	-0.434084	0.740163	0.320407	-1.35479	0.175485	0.22657		23.9477	0.201066	1.14955	0.313546	0.641265	0.521351	0.85613
C27A2.6	dsh-2	3314.51	3380.35	2574.75	2572.38	2764.24	2732.65	3690.64	3225.22	3641.09	9571.23	5071.04	5545.79	4043.77	4023.49	3766.02	3820.13	4442.41	3981.11	2153.15	4134.02	3282.61	3601.35	4201.99	3668.23		3883.42	-0.200014	0.870542	0.212356	-0.94188	0.346254	0.462273		3883.42	0.934781	1.9116	0.212145	4.40634	1.05134e-05	5.44335e-05		3883.42	0.0491553	1.03466	0.212187	0.23166	0.816802	0.963319
C27A7.4	che-11	182.329	224.81	319.241	217.3	250.57	266.984	450.845	506.424	423.249	134.106	288.666	313.892	298.721	391.256	335.257	207.048	221.349	220.847	271.698	166.448	218.261	170.168	148.943	194.385		267.616	0.0152017	1.01059	0.241706	0.0628934	0.949851	0.969531		267.616	-0.895106	0.537708	0.242086	-3.69747	0.000217758	0.000714036		267.616	-0.659144	0.633254	0.242313	-2.72022	0.00652376	0.133053
C27A7.5	C27A7.5	339.114	370.854	296.879	153.742	159.373	149.197	422.251	407.82	394.586	1948.68	742.129	755.337	399.575	397.199	497.51	368.396	467.406	493.486	658.816	833.372	636.324	595.052	671.37	590.47		531.206	-1.12274	0.45922	0.259392	-4.32836	1.50223e-05	8.22302e-05		531.206	1.489	2.80695	0.253084	5.88342	4.01865e-09	5.9571e-08		531.206	0.0382633	1.02688	0.254475	0.150362	0.880479	0.978783
C27A7.6	C27A7.6	213.158	205.939	160.392	140.858	138.124	117.787	264.979	215.398	300	1855.97	734.589	615.583	42.2627	46.5545	52.781	25.1815	38.0925	41.0424	193.049	391.776	228.034	214.047	336.249	235.143		283.624	-0.545966	0.684932	0.320787	-1.70196	0.0887631	0.155068		283.624	2.03593	4.10086	0.314242	6.47885	9.24266e-11	2.39271e-09		283.624	-0.443142	0.735531	0.359572	-1.23242	0.217793	0.649528
C27B7.6	C27B7.6	0	2.46142	2.31334	1.71778	3.54163	6.97996	21.9227	15.3172	27.707	69.5367	32.3133	34.3839	12.4867	14.8578	10.7517	8.39384	13.3839	11.7264	10.2142	1.1323	6.51526	5.35118	2.25671	7.31556		13.4409	1.31612	2.48996	0.78878	1.66856	0.095205	0.164208		13.4409	1.04212	2.05926	0.41865	2.48925	0.0128013	0.0229294		13.4409	-0.189966	0.876626	0.489198	-0.388322	0.697777	0.923608
C27B7.7	C27B7.7	140.931	225.63	332.35	236.195	226.664	260.876	416.532	441.326	365.924	187.087	270.355	262.871	208.432	205.038	209.169	129.638	164.724	149.512	397.333	292.133	340.965	312.509	321.581	295.758		266.397	0.0476304	1.03357	0.21591	0.220603	0.825401	0.881068		266.397	-0.757778	0.591407	0.216666	-3.49745	0.000469723	0.00136763		266.397	-0.489276	0.712382	0.222528	-2.19871	0.0278983	0.284495
C27B7.8	rap-1	3883.52	4057.24	4113.12	7462.91	7478.15	7431.04	3489.52	3687.61	3286.63	8140.76	4300.9	4815.97	1667.46	1563.04	1777.94	1760.84	1845.94	1793.16	2873.26	3903.04	3165.33	3221.41	3561.08	2934.58		3842.27	0.892186	1.85599	0.174923	5.10044	3.38868e-07	2.8103e-06		3842.27	0.720946	1.64826	0.175269	4.11336	3.89934e-05	0.000166251		3842.27	0.108547	1.07814	0.176516	0.614941	0.538594	0.862272
C27C12.4	C27C12.4	904.599	772.066	608.408	687.114	651.66	655.244	748.232	751.498	672.612	784.771	683.965	676.587	882.715	972.691	767.28	959.696	986.288	989.904	1049	1187.78	1237.9	1103.41	1295.35	1086.88		879.819	-0.195561	0.873233	0.139556	-1.40131	0.161121	0.251275		879.819	-0.0205293	0.985871	0.141307	-0.145281	0.884489	0.906696		879.819	0.162758	1.11943	0.138865	1.17206	0.241174	0.671138
C27C12.6	dmd-4	293.312	193.632	175.043	141.717	139.894	136.109	543.302	484.405	490.128	264.902	351.138	342.73	149.841	162.445	122.178	156.685	109.13	131.922	283.955	255.9	297.53	234.382	292.244	267.54		250.836	-0.661586	0.632183	0.189778	-3.4861	0.000490109	0.00183304		250.836	-0.657103	0.634151	0.182031	-3.60983	0.000306398	0.000957891		250.836	-0.125087	0.916949	0.197152	-0.63447	0.525774	0.856752
C27C12.7	dpf-2	144.454	192.811	242.901	177.791	178.852	151.814	166.803	182.849	158.599	59.6029	122.791	113.134	267.984	227.82	262.928	256.479	201.787	294.137	467.811	307.985	330.107	249.365	187.307	272.766		217.453	-0.192205	0.875267	0.228487	-0.841207	0.400232	0.517795		217.453	-0.759793	0.590581	0.241606	-3.14476	0.00166223	0.00399752		217.453	-0.0116204	0.991978	0.225987	-0.0514205	0.95899	0.998861
C27D11.1	egl-45	5186.25	6151.09	6472.73	7531.63	8163.45	8058.37	5243.34	5250.92	5485.99	11462	6064.13	7063.12	4515.39	4753.51	4802.1	3511.42	4202.53	3925.41	4620.91	6293.32	5777.95	5906.64	6889.73	5659.11		5957.96	0.415399	1.33367	0.179106	2.3193	0.0203789	0.045745		5957.96	0.621163	1.53811	0.179273	3.46489	0.00053044	0.0015166		5957.96	-0.273753	0.827165	0.179515	-1.52496	0.127269	0.538631
C27D6.1	C27D6.1	28.1861	36.9213	33.929	24.9079	35.4163	34.0273	60.0492	63.1833	64.9682	43.0465	56.0098	62.1129	43.2232	39.6208	34.2099	31.7101	33.9744	25.4072	54.1353	37.3659	46.6927	40.669	28.2088	57.4794		42.3106	-0.0740201	0.949987	0.269727	-0.274426	0.783758	0.849717		42.3106	-0.205548	0.867209	0.250639	-0.820098	0.412161	0.478454		42.3106	-0.36327	0.777401	0.275626	-1.31798	0.18751	0.614532
C27D8.4	C27D8.4	1104.54	704.787	465.752	447.483	418.798	428.395	74.3466	66.0553	64.9682	223.511	109.865	104.261	212.274	179.284	190.598	240.623	257.382	229.642	268.634	389.511	269.298	362.81	521.299	381.454		321.482	-0.812702	0.569315	0.261256	-3.11075	0.0018661	0.0059477		321.482	1.07414	2.10547	0.286187	3.75328	0.000174538	0.000592998		321.482	0.321575	1.24969	0.269054	1.19521	0.232007	0.662763
C27F2.1	wdr-60	179.687	200.196	232.876	200.122	173.54	209.399	90.5503	109.135	107.962	51.3247	85.0917	61.0037	170.011	203.057	201.35	180.934	178.108	164.17	88.8636	81.5256	110.759	100.602	88.0116	100.328		140.359	-0.0731763	0.950543	0.16458	-0.444623	0.656592	0.752834		140.359	-0.614808	0.653017	0.201538	-3.05058	0.00228398	0.0052071		140.359	-0.134295	0.911115	0.169153	-0.793926	0.427239	0.807496
C27F2.10	C27F2.10	2443.39	1910.06	1240.72	894.966	871.241	867.26	814.953	768.73	876.116	2784.78	1365.78	1354.28	1019.11	954.862	1095.7	1014.72	1229.26	1080.78	495.389	661.263	616.778	629.299	762.767	553.892		1096.09	-1.08673	0.470827	0.237813	-4.56969	4.8845e-06	3.08453e-05		1096.09	1.16029	2.23502	0.238436	4.86624	1.13744e-06	7.92877e-06		1096.09	0.11506	1.08302	0.238399	0.482637	0.629353	0.898045
C27F2.4	C27F2.4	1639.2	1236.45	825.091	459.507	422.339	423.16	594.773	644.278	652.549	478.479	496.548	499.121	1848.99	1661.1	1615.69	2334.42	1940.66	1915.31	385.076	415.554	468.013	398.128	469.395	406.536		926.266	-1.50306	0.352804	0.177181	-8.48319	2.19097e-17	1.66312e-15		926.266	-0.359128	0.779636	0.179968	-1.99551	0.0459874	0.069585		926.266	0.272332	1.20776	0.173966	1.56543	0.117481	0.525091
C27F2.8	tmem-131	4575.84	6157.65	8486.87	8675.67	8898.34	9098.38	6070.69	6595	5843.32	3834.45	4562.64	4895.83	6841.76	7493.29	8830.07	5776.83	7280.82	5331.6	3433	4037.78	4451.01	4500.34	4497.62	4302.59		6019.64	0.472603	1.38761	0.179378	2.63467	0.00842189	0.0216559		6019.64	-0.477223	0.718359	0.179797	-2.65423	0.00794895	0.0151454		6019.64	-0.333129	0.793813	0.179493	-1.85594	0.0634624	0.404517
C27H5.1	pdl-1	579.577	405.314	353.17	330.673	308.122	306.246	360.295	337.935	367.835	170.53	285.434	232.923	369.799	392.246	360.67	357.205	320.183	329.316	258.419	183.432	220.433	210.837	159.098	203.791		308.479	-0.500374	0.706924	0.184973	-2.70511	0.00682814	0.0182321		308.479	-0.619223	0.651021	0.191534	-3.23297	0.0012251	0.00309196		308.479	-0.15701	0.896882	0.186671	-0.841108	0.400288	0.790058
C27H5.4	mfsd-13.2	48.4449	50.0489	47.809	30.0612	32.7601	27.0473	135.349	116.793	78.344	34.7683	64.6266	61.0037	97.9727	145.607	97.7426	100.726	86.4804	95.7656	85.7993	62.2765	49.9503	54.5821	51.9043	81.5162		72.3908	-0.703241	0.614191	0.284545	-2.47146	0.0134562	0.0322488		72.3908	-1.01518	0.494765	0.266645	-3.80724	0.000140525	0.000496809		72.3908	-0.269074	0.829852	0.249403	-1.07887	0.280644	0.703978
C27H5.6	C27H5.6	23.782	16.4095	19.2778	8.58892	7.08326	8.72495	3.81265	6.70126	5.73249	4.96691	4.30844	7.76411	4.80258	0	0	0	1.02953	2.9316	1.02142	3.3969	1.08588	2.14047	0	2.09016		5.65212	-1.28273	0.411016	0.512287	-2.50393	0.0122821	0.0299171		5.65212	0.0821038	1.05856	0.65774	0.124827	0.90066	NA		5.65212	-0.312466	0.805264	1.04694	-0.298455	0.765356	0.94511
C27H5.8	glc-4	209.634	187.888	250.612	198.404	200.102	212.016	189.679	217.312	211.147	82.7818	115.251	124.226	430.311	384.322	362.625	439.278	328.419	405.538	280.891	140.405	217.175	168.027	116.22	194.385		236.11	-0.0869178	0.941532	0.214218	-0.405745	0.68493	0.775052		236.11	-0.926464	0.526146	0.227125	-4.07909	4.52126e-05	0.000188804		236.11	-0.00447241	0.996905	0.209127	-0.021386	0.982938	1
C27H6.1	unc-41	657.97	916.469	1614.71	1222.2	1290.92	1288.68	1679.47	1818.91	1697.77	645.698	1180.51	994.915	1777.92	1864.16	1775.98	1263.74	1286.91	1279.16	2769.07	1799.22	2009.96	1907.16	1329.2	1952.21		1500.96	0.253002	1.19168	0.246066	1.02819	0.303862	0.416516		1500.96	-0.879113	0.543702	0.246695	-3.56357	0.00036585	0.00111187		1500.96	-0.500509	0.706858	0.245847	-2.03585	0.0417652	0.341826
C27H6.2	ruvb-1	2817.73	2824.89	2054.25	1660.24	1830.14	1673.45	2035.95	1791.15	2087.58	6849.36	3207.64	3533.78	1842.27	1840.39	2026.2	1818.67	2187.75	2000.33	1595.46	2825.09	2279.26	2461.54	3106.36	2425.63		2448.96	-0.575764	0.670931	0.229877	-2.50467	0.0122567	0.0298748		2448.96	1.19944	2.29651	0.229785	5.21985	1.79067e-07	1.5776e-06		2448.96	0.0733238	1.05214	0.23014	0.318606	0.750026	0.939828
C27H6.3	tofu-1	698.488	640.79	362.423	255.091	264.737	243.426	208.742	164.66	251.274	1009.94	490.085	449.209	91.2491	90.1374	72.3296	107.255	118.396	101.629	291.105	503.873	367.026	414.182	592.386	455.655		343.504	-1.15626	0.448675	0.275703	-4.19386	2.74252e-05	0.00014158		343.504	1.63748	3.11121	0.277808	5.89428	3.76328e-09	5.64888e-08		343.504	0.366892	1.28957	0.294727	1.24485	0.213185	0.646974
C27H6.8	C27H6.8	2625.71	2120.92	1304.72	1290.91	1154.57	1190.96	897.878	789.791	884.714	3153.99	1697.53	1591.64	395.733	383.331	438.864	442.076	422.106	408.47	467.811	603.516	607.005	569.366	682.654	574.794		1029.13	-0.734487	0.601032	0.227148	-3.23352	0.00122274	0.00408993		1029.13	1.32308	2.50199	0.228035	5.80207	6.55018e-09	9.08758e-08		1029.13	0.0634613	1.04497	0.232559	0.272883	0.784943	0.952307
C27H6.9	C27H6.9	1018.22	678.532	430.281	252.514	285.986	294.031	95.3161	61.2687	106.051	423.843	190.649	179.684	141.196	126.787	199.395	240.623	290.327	211.075	60.2638	130.214	98.8148	100.602	125.247	94.0572		243.124	-1.35287	0.391514	0.314403	-4.30296	1.68532e-05	9.11787e-05		243.124	1.58806	3.00644	0.326801	4.85941	1.17735e-06	8.14343e-06		243.124	0.666572	1.5873	0.32087	2.07739	0.0377657	0.325231
C28A5.3	nex-3	270.411	174.761	148.054	139.141	139.009	126.512	170.616	168.489	171.019	61.2585	143.256	168.592	140.235	146.597	137.817	234.095	157.518	164.17	96.0136	81.5256	90.1278	146.622	124.119	169.303		148.719	-0.549938	0.683049	0.249507	-2.2041	0.0275176	0.0586587		148.719	-0.430422	0.742045	0.256422	-1.67857	0.0932362	0.130112		148.719	0.389427	1.30987	0.251641	1.54755	0.121731	0.530535
C28C12.10	tag-77	670.301	754.015	882.925	807.359	844.678	882.093	672.932	604.071	587.58	745.036	567.637	593.4	721.348	697.326	755.551	624.875	830.829	756.353	787.515	1007.75	912.137	1267.16	1212.98	1172.58		806.601	0.134634	1.09781	0.140211	0.960224	0.336942	0.452802		806.601	0.0269179	1.01883	0.14374	0.187267	0.851451	0.879517		806.601	0.0242615	1.01696	0.141621	0.171313	0.863977	0.973685
C28C12.13	sru-7	4.40408	0.820473	4.62668	1.71778	1.77081	1.74499	0.953161	0	0.955415	1.65564	2.15422	0	1.92103	0	0.977426	1.8653	3.08858	0	3.06426	2.2646	2.17175	0	0	1.04508		1.55005	-0.912798	0.531154	1.01513	-0.899191	0.368551	NA		1.55005	0.962166	1.94823	1.49877	0.641972	0.520891	NA		1.55005	0.750878	1.68282	1.27279	0.589948	0.555226	0.870615
C28D4.1	nhr-100	501.185	436.492	398.666	294.6	288.643	314.098	349.81	370.484	328.663	188.742	256.352	244.015	273.747	276.355	264.883	253.681	197.669	254.072	329.919	252.503	262.782	233.312	207.617	240.368		292.444	-0.573597	0.671939	0.145088	-3.95343	7.70373e-05	0.000352448		292.444	-0.59518	0.661962	0.153069	-3.88832	0.000100942	0.0003736		292.444	-0.206855	0.866424	0.152064	-1.36032	0.173729	0.602094
C28D4.2	cka-1	748.694	807.346	715.593	645.887	624.212	677.929	383.171	411.649	339.172	596.029	425.459	413.716	604.165	629.971	660.74	559.589	625.953	600.978	8400.16	5874.37	7349.22	5701.15	4024.84	5520.11		1972.5	-0.221631	0.857595	0.163011	-1.35961	0.173954	0.266649		1972.5	0.333213	1.25982	0.168803	1.97397	0.0483852	0.0727356		1972.5	-0.0851448	0.94269	0.164619	-0.517223	0.605	0.889286
C28D4.9	nhr-138	471.237	493.105	441.077	622.697	618.9	591.552	549.974	562.906	508.281	508.28	480.391	422.589	259.339	239.706	264.883	263.007	269.736	233.551	346.262	202.682	284.5	189.432	169.253	161.987		381.472	0.383549	1.30455	0.144355	2.65699	0.00788412	0.0205142		381.472	-0.202713	0.868915	0.147421	-1.37506	0.169112	0.219333		381.472	0.00417338	1.0029	0.15475	0.0269685	0.978485	1
C28F5.2	glb-9	29.9478	30.3575	31.6156	43.8035	39.8433	41.8798	42.8923	52.6528	34.3949	38.0796	47.3929	24.4015	413.022	343.711	385.106	362.801	416.959	311.727	41.8783	40.7628	43.4351	35.3178	34.979	49.1187		122.337	0.448885	1.36498	0.244516	1.83581	0.0663855	0.121966		122.337	-0.243905	0.844457	0.256309	-0.951606	0.341297	0.404809		122.337	-0.0656872	0.95549	0.174246	-0.37698	0.706188	0.926098
C28G1.3	sec-15	747.813	863.138	810.44	655.335	657.857	664.841	895.019	900.841	823.568	1168.88	822.913	945.003	1067.13	1153.96	1069.3	941.043	1064.53	949.839	654.731	724.672	731.881	765.219	825.955	734.691		859.942	-0.292038	0.816748	0.120919	-2.41515	0.0157286	0.0367594		859.942	0.159937	1.11724	0.121081	1.32091	0.186533	0.238935		859.942	-0.155144	0.898043	0.119595	-1.29724	0.194547	0.623274
C28H8.1	bcl-7	6840.42	5281.39	2900.16	1620.73	1546.81	1525.12	721.543	604.071	755.733	2662.26	1273.14	1241.15	2700.01	2360.41	2772.96	4708.95	3417	3172.97	2119.45	3131.94	2806.99	3447.23	4374.63	3300.36		2720.23	-1.67851	0.312404	0.270872	-6.19671	5.76563e-10	9.1451e-09		2720.23	1.31287	2.48436	0.272656	4.81514	1.47098e-06	9.8983e-06		2720.23	0.52851	1.44244	0.270759	1.95196	0.0509433	0.364629
C28H8.11	tdo-2	746.052	590.741	532.068	505.887	446.245	421.415	868.33	815.639	707.963	379.141	597.796	499.121	1272.68	1260.93	1211.03	1262.81	1039.82	989.904	486.196	424.612	479.958	495.52	461.497	464.015		706.641	-0.443342	0.735429	0.160164	-2.76806	0.00563911	0.0154339		706.641	-0.689951	0.619875	0.161343	-4.27631	1.90016e-05	9.03301e-05		706.641	-0.185403	0.879404	0.156762	-1.1827	0.236928	0.668739
C28H8.12	dnc-2	2779.86	1998.67	1275.42	915.579	801.293	870.75	589.054	575.351	607.644	1165.57	765.826	791.939	845.254	771.615	836.677	972.753	986.288	841.369	632.259	709.952	709.078	806.958	983.924	789.035		959.255	-1.22589	0.427535	0.203501	-6.02399	1.70166e-09	2.43e-08		959.255	0.617186	1.53388	0.206224	2.99279	0.00276436	0.00611119		959.255	0.190726	1.14134	0.2049	0.930825	0.351944	0.761609
C28H8.2	C28H8.2	270.411	164.095	117.98	79.877	85.8845	94.2295	11.4379	16.2745	10.5096	44.7022	14.0024	13.3099	15.3683	20.8009	22.4808	41.0366	21.6201	31.2704	9.19279	22.646	10.8588	20.3345	13.5402	11.4959		48.4733	-1.08605	0.471051	0.340261	-3.1918	0.00141388	0.00463544		48.4733	0.839465	1.78939	0.442743	1.89605	0.0579531	0.0854115		48.4733	0.684557	1.60721	0.402473	1.70088	0.0889662	0.468415
C28H8.3	C28H8.3	1920.18	2303.07	2441.34	2478.76	2471.17	2414.19	3449.49	3322.87	3429.94	6673.87	3933.61	4500.97	5245.38	5478.57	5225.32	4235.16	4940.7	4285.02	4042.78	4813.4	4723.57	4599.88	4692.82	4395.61		4000.74	0.14383	1.10483	0.152484	0.943243	0.345557	0.461629		4000.74	0.565401	1.4798	0.152049	3.71855	0.000200373	0.000666822		4000.74	-0.244764	0.843954	0.151745	-1.613	0.106745	0.505856
C28H8.4	erd-2.2	6203.59	5289.59	4217.99	4822.68	5150.41	5061.34	3539.09	3328.61	3600	12195.4	5681.76	5581.29	3347.4	3112.22	3185.43	3988.01	3829.84	3814.01	4104.07	5363.7	4794.15	4387.97	5240.07	4147.92		4749.44	-0.063466	0.956962	0.216265	-0.293464	0.769168	0.839605		4749.44	1.16359	2.24014	0.216436	5.37614	7.60999e-08	7.57289e-07		4749.44	0.270224	1.206	0.216626	1.24742	0.212242	0.645638
C28H8.5	C28H8.5	16.7355	18.0504	3.08445	27.4845	20.3644	22.6849	27.6417	32.549	34.3949	18.212	24.7735	23.2923	3.84207	2.97156	8.79684	7.46119	6.17717	7.8176	12.257	9.05839	2.17175	7.49166	9.02683	10.4508		14.8663	0.913344	1.88341	0.425219	2.14793	0.0317189	0.0659466		14.8663	-0.498207	0.707986	0.411722	-1.21006	0.226257	0.28298		14.8663	0.461259	1.37674	0.578132	0.797844	0.424961	0.805425
C28H8.6	pxl-1	1490.34	1658.18	1688.74	2715.82	2704.92	2558.16	1180.01	1200.48	1131.21	644.042	848.763	901.746	578.231	632.943	556.156	584.771	563.152	596.092	765.044	712.216	745.998	604.684	535.968	566.433		1090.17	0.721768	1.6492	0.110158	6.5521	5.67348e-11	1.11066e-09		1090.17	-0.546082	0.684878	0.114977	-4.74947	2.03947e-06	1.32473e-05		1090.17	-0.0188972	0.986987	0.117777	-0.160449	0.872527	0.976793
C28H8.8	C28H8.8	7.92735	7.38426	11.5667	3.43557	3.54163	6.10747	5.71897	1.91465	3.82166	0	4.30844	4.43663	77.8018	81.2227	58.6456	78.3425	64.8603	64.4952	3.06426	4.5292	6.51526	4.28095	0	7.31556		21.3015	-1.04732	0.483865	0.512983	-2.04163	0.0411878	0.0819022		21.3015	-0.231761	0.851595	0.705882	-0.328328	0.742664	0.785193		21.3015	-0.06652	0.954939	0.283233	-0.23486	0.814318	0.962617
C28H8.9	dpff-1	3332.13	3283.53	3193.95	4038.51	4102.98	4076.3	1705.21	1724.14	1574.52	2337.76	1698.6	1794.62	3372.37	3459.89	3272.42	3258.68	3639.38	3226.72	2078.59	2420.86	2504.03	2303.15	2634.71	2200.94		2801.42	0.316745	1.24552	0.118023	2.68376	0.00727985	0.0192106		2801.42	0.217996	1.16312	0.12025	1.81286	0.0698533	0.100869		2801.42	0.00279042	1.00194	0.118357	0.0235763	0.981191	1
C29A12.1	C29A12.1	1390.81	919.751	559.057	396.808	346.194	346.381	187.773	140.726	212.102	860.93	389.914	397.079	361.154	310.033	511.194	452.335	464.317	430.945	205.306	318.176	233.464	264.348	371.228	256.045		430.253	-1.39692	0.379738	0.2964	-4.71296	2.44145e-06	1.65109e-05		430.253	1.60363	3.03907	0.301474	5.31929	1.04174e-07	9.9243e-07		430.253	0.188644	1.13969	0.298028	0.632974	0.52675	0.856752
C29A12.3	lig-1	4080.82	4030.17	3119.92	2860.11	2906.79	2977.83	2255.18	1934.75	2234.72	6074.53	3159.17	3689.06	2440.67	2455.5	2554.02	2309.24	2529.55	2222.15	964.221	1809.41	1490.91	1869.7	2115.66	1859.2		2664.3	-0.360934	0.77866	0.207792	-1.737	0.0823877	0.145678		2664.3	1.00739	2.01027	0.208166	4.83935	1.30261e-06	8.88088e-06		2664.3	-0.0774461	0.947734	0.208276	-0.371844	0.710009	0.927793
C29A12.4	nrx-1	599.836	726.939	1266.17	1482.45	1483.06	1343.64	1547.93	1516.4	1443.63	657.287	1087.88	992.697	743.44	812.227	731.115	507.361	571.388	566.776	1731.31	1272.7	1304.14	1186.89	932.02	1210.2		1071.56	0.732132	1.66109	0.216308	3.38468	0.000712607	0.00256587		1071.56	-0.717005	0.608359	0.217066	-3.30316	0.00095601	0.00251406		1071.56	-0.474886	0.719523	0.21871	-2.1713	0.0299084	0.293366
C29E4.12	C29E4.12	2375.56	1949.44	906.829	432.023	391.35	422.288	253.541	245.075	246.497	271.524	234.81	259.543	292.958	252.583	246.311	468.19	338.715	354.724	294.169	247.974	292.101	301.807	346.405	294.712		488.297	-2.07002	0.238156	0.226589	-9.13556	6.50712e-20	8.64401e-18		488.297	0.0379493	1.02665	0.235992	0.160808	0.872245	0.896718		488.297	0.55325	1.46739	0.232116	2.38351	0.0171485	0.227856
C29E4.13	C29E4.13	1135.37	838.524	618.433	435.458	468.38	401.348	1100.9	1088.48	1270.7	3496.7	1802.01	1886.68	305.444	335.786	392.925	392.645	459.169	388.926	514.796	617.103	590.717	588.63	697.323	581.064		850.313	-0.989501	0.503652	0.222579	-4.44561	8.76435e-06	5.08962e-05		850.313	1.05276	2.0745	0.220078	4.78359	1.72196e-06	1.14026e-05		850.313	0.262553	1.1996	0.226047	1.1615	0.24544	0.675918
C29E4.15	C29E4.15	645.639	487.361	286.854	262.821	239.945	245.171	364.108	344.636	354.459	259.935	291.897	319.438	547.494	539.834	460.368	824.462	621.835	668.405	522.967	572.943	616.778	545.821	680.397	525.675		467.885	-0.923255	0.527318	0.2057	-4.48835	7.17757e-06	4.28179e-05		467.885	-0.284351	0.821111	0.208763	-1.36207	0.173175	0.223952		467.885	0.450639	1.36665	0.202369	2.22682	0.0259593	0.276111
C29E4.2	kle-2	3595.49	4054.78	3938.85	3373.73	3502.67	3358.23	1841.51	1734.67	1870.7	4438.76	2450.43	2659.76	2755.72	2849.73	3269.49	2298.98	2675.74	2444.95	1658.79	2568.05	2280.34	2867.16	3149.24	2657.64		2845.64	-0.179341	0.883106	0.182439	-0.983023	0.325596	0.441025		2845.64	0.808517	1.75141	0.18331	4.41064	1.03064e-05	5.35169e-05		2845.64	-0.258436	0.835994	0.182927	-1.41278	0.15772	0.582296
C29E4.3	ran-2	1514.12	1794.38	1624.74	1408.58	1428.16	1463.17	2308.56	1919.43	2345.54	9130.83	4374.15	4654.03	851.018	906.326	991.11	814.203	998.642	949.839	2184.82	3437.66	2504.03	3009.51	3568.98	2838.44		2375.84	-0.198263	0.8716	0.216606	-0.915313	0.360027	0.477065		2375.84	1.46526	2.76113	0.215865	6.78786	1.13812e-11	4.23533e-10		2375.84	0.00732028	1.00509	0.218233	0.0335433	0.973241	1
C29E4.5	tag-250	569.007	686.736	723.304	805.641	850.876	817.528	1598.45	1761.47	1468.47	812.917	1138.51	1193.45	1214.09	1312.44	1228.63	1003.53	1209.7	1200	1847.75	1646.36	1957.84	1446.96	1630.47	1418.17		1230.93	0.321401	1.24954	0.143526	2.23932	0.0251348	0.054354		1230.93	-0.614739	0.653048	0.142316	-4.31953	1.56362e-05	7.65208e-05		1230.93	-0.137955	0.908806	0.141909	-0.972138	0.330982	0.743537
C29E6.1	let-653	1037.6	1360.35	1774.33	2763.91	2685.44	2708.22	2878.55	3006.95	2806.05	1596.03	1887.1	2373.6	2274.5	2643.7	2062.37	2176.8	2410.13	2014.99	1045.93	1113.05	1478.96	1230.77	1300.99	1123.46		1989.74	0.966881	1.95461	0.179634	5.38251	7.34554e-08	7.11504e-07		1989.74	-0.568488	0.674323	0.179772	-3.16228	0.0015654	0.00380434		1989.74	-0.0804928	0.945735	0.17954	-0.448327	0.653918	0.909658
C29E6.2	trpa-1	166.474	251.065	325.41	419.998	355.048	370.81	809.234	959.237	820.702	430.465	567.637	612.256	1100.75	1136.13	1112.31	1239.49	1197.34	1206.84	412.654	330.631	360.511	356.389	384.769	384.589		637.948	0.622342	1.53937	0.179478	3.46751	0.000525299	0.00194413		637.948	-0.68086	0.623793	0.175316	-3.88361	0.000102918	0.000379436		637.948	0.121622	1.08796	0.17173	0.708218	0.47881	0.837807
C29E6.4	cutl-27	52.849	59.8946	88.678	125.398	121.301	132.619	144.881	161.788	139.491	54.636	68.9351	77.6411	180.577	171.36	151.501	137.099	156.488	171.987	178.749	109.833	145.508	133.78	108.322	143.176		125.687	0.907187	1.87538	0.207867	4.36427	1.27547e-05	7.10198e-05		125.687	-1.13222	0.456213	0.217388	-5.20829	1.90587e-07	1.65662e-06		125.687	-0.113539	0.924318	0.195875	-0.579652	0.56215	0.873863
C29E6.5	nhr-43	442.17	525.923	690.146	848.585	816.345	892.563	1369.69	1399.61	1059.56	422.187	624.724	662.168	565.744	684.45	546.381	303.111	334.597	347.883	329.919	266.09	299.702	240.803	214.387	246.639		588.891	0.624175	1.54133	0.1782	3.50266	0.000460639	0.0017324		588.891	-1.15868	0.447923	0.179107	-6.4692	9.85209e-11	2.50804e-09		588.891	-0.866355	0.548531	0.182241	-4.75389	1.99542e-06	0.000222636
C29F4.3	C29F4.3	14.0931	4.92284	14.6512	11.1656	12.3957	6.97996	4.76581	10.5306	9.55415	0	6.46266	4.43663	24.9734	25.7535	22.4808	31.7101	25.7382	26.3844	5.1071	4.5292	5.42939	18.194	9.02683	28.2172		13.6459	-0.141214	0.906756	0.458182	-0.308206	0.757926	0.83184		13.6459	-1.03917	0.486608	0.627074	-1.65717	0.0974855	0.135249		13.6459	0.197209	1.14648	0.389416	0.506422	0.61256	0.89323
C29F5.1	C29F5.1	1225.22	1160.97	1165.15	1040.98	1044.78	1114.18	1263.89	1356.53	1193.31	508.28	892.925	807.467	835.649	754.777	787.806	766.638	705.227	795.441	1508.64	1056.44	1269.39	1080.94	985.053	1170.49		1020.42	-0.150259	0.901089	0.1604	-0.936774	0.348875	0.465521		1020.42	-0.782238	0.581464	0.162471	-4.81465	1.4746e-06	9.91162e-06		1020.42	-0.0688221	0.953416	0.162577	-0.423319	0.672063	0.915582
C29F5.3	C29F5.3	1.76163	0.820473	2.31334	6.87114	0.885407	4.36248	1.90632	0.957323	0	0	0	0	31.697	30.7061	30.3002	34.508	23.6791	35.1792	0	3.3969	0	5.35118	2.25671	2.09016		9.12678	1.30687	2.47403	0.784532	1.66579	0.0957551	0.164889		9.12678	-2.04857	0.241723	1.48339	-1.38101	0.167276	NA		9.12678	0.0124823	1.00869	0.403457	0.0309383	0.975319	1
C29F5.7	glb-10	44.0408	32.8189	30.8445	28.3434	19.479	17.4499	74.3466	86.1591	62.102	51.3247	51.7013	62.1129	32.6576	29.7156	47.8939	47.5651	31.9154	45.9284	33.7069	22.646	33.6622	19.2643	23.6954	41.8032		40.4657	-0.716283	0.608663	0.306416	-2.33762	0.0194071	0.0438014		40.4657	-0.426009	0.744318	0.273704	-1.55646	0.119599	0.161905		40.4657	0.189058	1.14002	0.291176	0.649292	0.51615	0.855093
C29F5.8	C29F5.8	0	0	0.771113	0	0	0	0	0.957323	0	0	0	1.10916	0	0	0	0	0	0	0	1.1323	1.08588	3.21071	0	0		0.344437	-0.877885	0.544165	3.04499	-0.288305	0.773113	NA		0.344437	0.393971	1.31401	3.04492	0.129386	0.897052	NA		0.344437	0	1	3.04499	0	1	1
C29F9.7	pat-4	1809.2	1907.6	1808.26	1552.88	1734.51	1586.2	3005.32	3386.05	3092.68	2019.88	2463.35	2585.45	3866.08	3967.03	3609.64	3731.53	3382	3572.64	5081.57	4913.05	4970.06	4620.21	4907.21	4843.94		3267.35	-0.181073	0.882046	0.099039	-1.82831	0.0675037	0.123685		3267.35	-0.421811	0.746487	0.0985429	-4.28048	1.86495e-05	8.89522e-05		3267.35	-0.0985892	0.933946	0.0974379	-1.01182	0.311626	0.727497
C29G2.3	C29G2.3	303.882	279.781	331.579	320.367	316.09	308.863	183.96	179.019	227.389	99.3381	172.338	112.025	877.912	751.805	725.25	708.813	517.853	740.718	779.344	458.581	535.337	367.091	236.954	418.032		414.68	0.0464593	1.03273	0.223657	0.207726	0.835443	0.889063		414.68	-0.610497	0.654971	0.237537	-2.57011	0.0101665	0.0187203		414.68	-0.259167	0.83557	0.21938	-1.18136	0.237459	0.669043
C29G2.6	C29G2.6	472.998	346.24	222.852	261.103	228.435	236.446	93.4098	107.22	143.312	34.7683	68.9351	49.9121	268.945	226.829	204.282	277.929	179.138	220.847	413.675	286.472	296.444	252.576	203.104	270.676		223.606	-0.520122	0.697313	0.246666	-2.10861	0.034978	0.0713467		223.606	-1.13795	0.454404	0.281551	-4.04172	5.30608e-05	0.000216516		223.606	-0.0455095	0.968948	0.250207	-0.181887	0.855671	0.969851
C29H12.1	rars-2	965.375	982.927	543.635	560.857	547.182	543.564	299.293	254.648	257.007	367.551	289.743	318.329	218.037	204.047	200.372	184.665	179.138	182.736	277.826	408.76	326.849	367.091	471.652	454.61		391.912	-0.592771	0.663068	0.187928	-3.15424	0.00160918	0.00520691		391.912	0.262824	1.19983	0.196734	1.33594	0.18157	0.233163		391.912	-0.187604	0.878063	0.201303	-0.931949	0.351363	0.76122
C29H12.2	C29H12.2	3753.16	3902.17	3324.27	4317.65	4467.76	4328.45	11152.9	8844.71	10960.5	53707.2	23334.5	23719.4	4184.97	4148.3	4762.02	3916.19	5154.85	4613.36	2642.42	4242.73	3209.85	3843.22	4302.41	3613.89		8518.62	0.256286	1.1944	0.23543	1.08859	0.276336	0.386766		8518.62	1.70242	3.25447	0.234996	7.24447	4.34118e-13	2.9262e-11		8518.62	0.0634498	1.04496	0.23545	0.269483	0.787558	0.952307
[truncated: 6,582 more rows]

## Sheet: >2x elegans alone
	Alternate gene name	CELEG:NONE_1	CELEG:NONE_2	CELEG:NONE_3	CELEG:NACL_1	CELEG:NACL_2	CELEG:NACL_3	CBRIG:NONE_1	CBRIG:NONE_2	CBRIG:NONE_3	CBRIG:NACL_1	CBRIG:NACL_2	CBRIG:NACL_3	CKAMA:NONE_1	CKAMA:NONE_2	CKAMA:NONE_3	CKAMA:NACL_1	CKAMA:NACL_2	CKAMA:NACL_3	CTROP:NONE_1	CTROP:NONE_2	CTROP:NONE_3	CTROP:NACL_1	CTROP:NACL_2	CTROP:NACL_3		baseMeanCELEG	log2FoldChangeCELEG	Fold Change	lfcSECELEG	statCELEG	pvalueCELEG	padjCELEG		baseMeanCBRIG	log2FoldChangeCBRIG	Fold Change	lfcSECBRIG	statCBRIG	pvalueCBRIG	padjCBRIG		baseMeanCKAMA	log2FoldChangeCKAMA	Fold Change	lfcSECKAMA	statCKAMA	pvalueCKAMA	padjCKAMA
[truncated: 1,050 more rows]

[truncated: 5 more sheets: >2x elegans and brig, >2x elegans and kama, >2x ele, brig, kama, >2x elegans and trop, >2x all 4]
