# Supplementary material for: Intergenerational adaptations to stress are evolutionarily conserved, stress-specific, and have deleterious trade-offs
Source: eLife. 2021 Oct 8;10:e73425. doi: 10.7554/eLife.73425 (PMC8570697; doi:10.7554/eLife.73425)
Supplement: Supplementary file 4. [file elife-73425-supp4.xlsx]

## Sheet: Sheet1
Gene	Alternate gene name	CELEG:HB101_1	CELEG:HB101_2	CELEG:HB101_3	CELEG:BB446_1	CELEG:BB446_2	CELEG:BB446_3	CELEG:NACL_2	CELEG:NACL_3	CKAMA:HB101_1	CKAMA:HB101_2	CKAMA:HB10_3	CKAMA:BB446_1	CKAMA:BB446_2	CKAMA:BB446_3	CKAMA:NACL_1	CKAMA:NACL_2	CKAMA:NACL_3		baseMean:CELEG:BB446	log2FoldChange:CELEG:BB446	Fold change	lfcSE:CELEG:BB446	stat:CELEG:BB446	pvalue:CELEG:BB446	padj:CELEG:BB446		baseMean:CELEG:NACL	log2FoldChange:CELEG:NACL	Fold change	lfcSE:CELEG:NACL	stat:CELEG:NACL	pvalue:CELEG:NACL	padj:CELEG:NACL		baseMean:CKAMA:BB446	log2FoldChange:CKAMA:BB446	Fold change	lfcSE:CKAMA:BB446	stat:CKAMA:BB446	pvalue:CKAMA:BB446	padj:CKAMA:BB446		baseMean:CKAMA:NACL	log2FoldChange:CKAMA:NACL	Fold change	lfcSE:CKAMA:NACL	stat:CKAMA:NACL	pvalue:CKAMA:NACL
C16C10.2	rga-9	1235	1151.81	1491.08	681.513	756.104	729.178	805.144	872.538	626.32	549.344	574.111	474.983	501.631	481.66	698.986	583.917	817.709		766.532	-0.839939	0.558667	0.149957	-5.60119	2.12884e-08	9.60058e-05		766.532	-0.624121	0.648815	0.167616	-3.72351	0.00019647	0.0769616		766.532	-0.263144	0.83327	0.153587	-1.71332	0.086653	0.973655		766.532	0.263261	1.20019	0.152306	1.7285	0.083898
C16C2.4	nas-6	2706.77	2278.28	2817.7	1460.67	1550.38	1660.55	1790.23	1766.94	1268.47	1149.86	1151.87	1083.91	1168.99	1101.2	1269.26	1227.84	1610.12		1591.94	-0.73994	0.598764	0.136444	-5.42302	5.85997e-08	9.60058e-05		1591.94	-0.548265	0.683842	0.152547	-3.59408	0.000325535	0.0769616		1591.94	-0.09028	0.93934	0.138223	-0.653146	0.513662	0.973655		1591.94	0.202029	1.15031	0.137862	1.46544	0.1428
T01B7.5	4R79.2	3211.22	2657.48	3425.7	1754.58	2081.67	1763.93	2150.1	2356.29	966.69	842.815	937.796	836.92	950.693	849.34	1021.75	1021.85	1100.52		1642.9	-0.731135	0.60243	0.133547	-5.47475	4.38132e-08	9.60058e-05		1642.9	-0.459513	0.727232	0.149213	-3.07957	0.00207299	0.104704		1642.9	-0.0589511	0.959962	0.137056	-0.430123	0.667106	0.974801		1642.9	0.194748	1.14452	0.136652	1.42514	0.154116
C13F10.2	sri-20	633.499	542.447	731.587	301.799	370.099	365.962	337.51	344.423	382.916	343.601	364.901	272.64	311.849	334.588	492.062	385.098	543.934		415.23	-0.878262	0.544023	0.171021	-5.13542	2.81521e-07	0.000125789		415.23	-0.899222	0.536176	0.192422	-4.67317	2.96579e-06	0.0105656		415.23	-0.247815	0.842171	0.174059	-1.42374	0.154523	0.973655		415.23	0.380416	1.30172	0.171975	2.21204	0.0269637
T23G11.2	spe-10	2158.59	2000.46	2855.58	1216.07	1252.4	1085.99	1370.37	1485.94	264.182	277.805	287.056	253.641	238.787	296.901	281.179	274.047	438.22		943.366	-0.980956	0.506644	0.19078	-5.14181	2.721e-07	0.000125789		943.366	-0.711373	0.610738	0.213229	-3.3362	0.000849317	0.0968071		943.366	-0.0703823	0.952386	0.20164	-0.349049	0.727052	0.975883		943.366	0.26212	1.19924	0.200448	1.30767	0.190985
ZK1248.11	AC3.5	1237.14	1039.27	1361.51	617.406	662.784	767.604	817.343	810.214	417.547	354.045	431.8	370.487	330.56	378.71	514.834	382.412	496.95		646.506	-0.828652	0.563055	0.161012	-5.14653	2.65349e-07	0.000125789		646.506	-0.575447	0.671079	0.179874	-3.19916	0.00137829	0.0983518		646.506	-0.155979	0.897523	0.167276	-0.932464	0.351097	0.973655		646.506	0.212394	1.15861	0.16612	1.27855	0.201054
C49H3.3	col-151	3214.42	2483.09	3388.82	1361.05	1404.04	1953.32	1768.88	1850.04	940.965	789.552	943.878	798.921	730.617	997.331	1045.51	946.626	1151.12		1515.78	-0.945073	0.519403	0.184011	-5.13596	2.8071e-07	0.000125789		1515.78	-0.743196	0.597414	0.20574	-3.61231	0.000303486	0.0769616		1515.78	-0.0817605	0.944904	0.186522	-0.438342	0.661139	0.974801		1515.78	0.233185	1.17543	0.186141	1.25274	0.210302
T25D3.2	AH9.1	1378.98	1258.27	1436.26	857.07	906.689	928.627	981.015	1045.3	421.505	373.888	434.232	363.837	381.346	410.882	462.36	415.548	459.001		736.165	-0.597302	0.660989	0.116138	-5.14302	2.70361e-07	0.000125789		736.165	-0.422639	0.746059	0.129843	-3.25499	0.00113395	0.0983518		736.165	-0.0879749	0.940842	0.125255	-0.702365	0.482452	0.973655		736.165	0.121173	1.08762	0.124419	0.97391	0.330101
F43G9.10	AH9.4	4026.02	3184.72	4013.76	1950.84	2255.59	2194.85	2462.2	2482.03	2059.04	1571.79	1639.62	1505.7	1538.75	1373.28	2126.66	1603.08	1957.98		2232.11	-0.810226	0.570293	0.155656	-5.20524	1.93748e-07	0.000125789		2232.11	-0.597857	0.660735	0.174015	-3.43566	0.000591117	0.085295		2232.11	-0.254935	0.838025	0.156776	-1.62611	0.103925	0.973655		2232.11	0.109432	1.0788	0.156478	0.699341	0.484339
F10E7.5	lin-24	5310.09	4858.7	5984.26	3515.07	3233.33	3563.55	3547.92	3659.63	1361.48	1236.55	1328.24	1168.46	1165.42	1367.77	1474.21	1217.99	1355.32		2667.53	-0.647424	0.638419	0.125144	-5.17343	2.2984e-07	0.000125789		2667.53	-0.579305	0.669286	0.139996	-4.13801	3.50338e-05	0.0492646		2667.53	-0.0849786	0.942799	0.128144	-0.663147	0.507236	0.973655		2667.53	0.0436199	1.0307	0.127991	0.340803	0.733252
T04A8.10	B0001.2	1239.27	949.029	1212	628.255	623.547	647.752	672.987	761.011	313.655	302.87	325.978	302.089	240.569	241.749	299.99	258.822	359.611		551.717	-0.839801	0.55872	0.159697	-5.25873	1.45052e-07	0.000125789		551.717	-0.660824	0.632517	0.17861	-3.69982	0.000215755	0.0769616		551.717	-0.26504	0.832176	0.169192	-1.5665	0.117231	0.973655		551.717	-0.0368213	0.9748	0.168197	-0.218918	0.826714
ZK1236.7	asps-1	1628.54	1396.17	1663.51	1006	1004.25	1053.05	1096.91	1127.3	2637.87	2621.4	2641.88	2397.71	2468.95	2320.06	3249.39	2810.32	3672.01		2046.78	-0.613776	0.653484	0.123597	-4.96593	6.83733e-07	0.000200209		2046.78	-0.490815	0.711623	0.138313	-3.54857	0.000387329	0.0775035		2046.78	-0.136705	0.909594	0.121253	-1.12744	0.259558	0.973655		2046.78	0.300624	1.23168	0.120974	2.48504	0.0129537
F23C8.6	B0024.11	3114.17	2401.97	3096.78	1708.22	1819.74	1784.06	1971.18	2041.39	1095.32	922.188	1013.21	882.518	921.29	991.815	1150.46	1097.98	1383.33		1611.51	-0.697234	0.616753	0.140473	-4.96346	6.92484e-07	0.000200209		1611.51	-0.517012	0.698818	0.15706	-3.29182	0.000995426	0.0983518		1611.51	-0.116576	0.922374	0.143271	-0.813675	0.415831	0.973655		1611.51	0.260975	1.19829	0.142739	1.82834	0.0674992
T23B12.7	gna-1	2019.94	1544.2	2202.73	928.081	1060.45	1058.54	1164	1223.52	635.225	485.637	547.352	455.034	482.029	394.336	735.618	513.166	768.014		953.994	-0.920366	0.528375	0.184617	-4.98527	6.18741e-07	0.000200209		953.994	-0.687358	0.62099	0.20637	-3.3307	0.000866274	0.0968071		953.994	-0.325647	0.79794	0.189282	-1.72043	0.085354	0.973655		953.994	0.273123	1.20842	0.188014	1.45267	0.146314
C01A2.5	B0024.15	3943.9	3564.94	4266.92	2384.8	2329.82	2700.8	2592.32	2587	1953.17	1803.65	1937.63	1759.34	1692	1868.73	2134.58	1857.43	2521.8		2464.64	-0.66707	0.629784	0.133935	-4.98057	6.33985e-07	0.000200209		2464.64	-0.600034	0.659738	0.149851	-4.0042	6.22289e-05	0.0492646		2464.64	-0.0980929	0.934267	0.135041	-0.726396	0.467596	0.973655		2464.64	0.193989	1.14392	0.134808	1.43901	0.150148
F10E9.11	vps-34	2026.34	1281.59	1871.82	710.115	880.177	965.224	934.252	1052.95	124.67	93.9943	104.605	75.9973	94.4456	100.193	129.699	111.052	154.506		630.097	-1.01907	0.493436	0.202588	-5.03023	4.89886e-07	0.000200209		630.097	-0.797224	0.575456	0.226494	-3.51984	0.000431802	0.0787477		630.097	-0.257135	0.836748	0.232056	-1.10807	0.267831	0.973655		630.097	0.288469	1.22134	0.227317	1.26902	0.204435
C16C10.10	B0034.1	1080.36	902.388	1176.12	644.035	562.041	644.092	611.991	750.077	311.676	301.826	304.084	261.241	277.991	260.133	310.88	331.364	413.824		537.89	-0.771334	0.585875	0.154001	-5.00862	5.48206e-07	0.000200209		537.89	-0.629141	0.646561	0.172342	-3.65054	0.000261689	0.0769616		537.89	-0.198986	0.871163	0.163644	-1.21597	0.223998	0.973655		537.89	0.20333	1.15135	0.161911	1.25581	0.209185
Y51H4A.15	casy-1	1793.85	1583.74	1870.83	1008.96	1072.12	1071.35	1092.84	1167.76	1162.6	905.478	928.065	848.319	863.375	1033.18	1250.45	1026.33	1314.66		1176.11	-0.73542	0.600643	0.148854	-4.94056	7.78986e-07	0.000212706		1176.11	-0.630313	0.646036	0.166589	-3.78365	0.000154546	0.0734093		1176.11	-0.126972	0.915752	0.150161	-0.845569	0.397793	0.973655		1176.11	0.260706	1.19806	0.149632	1.74232	0.0814533
F26H9.7	B0034.5	901.19	783.76	909.001	535.545	538.711	615.73	625.207	637.456	547.164	518.013	532.756	489.232	548.854	518.428	524.735	523.913	447.255		599.821	-0.617344	0.65187	0.125423	-4.9221	8.56199e-07	0.000221485		599.821	-0.453726	0.730155	0.14028	-3.23443	0.00121886	0.0983518		599.821	-0.037732	0.974185	0.127798	-0.295246	0.767806	0.979046		599.821	-0.0956406	0.935857	0.128047	-0.746919	0.455112
F53F4.14	znf-207	2987.26	2591.58	3052.93	1845.31	1892.91	2024.68	2157.22	2179.16	2291.56	2069.96	2047.1	1931.28	1968.21	1777.73	2361.31	2018.63	2442.28		2214.07	-0.582722	0.667703	0.118924	-4.89994	9.58681e-07	0.000224377		2214.07	-0.4082	0.753563	0.132958	-3.07015	0.00213953	0.104704		2214.07	-0.175061	0.88573	0.119282	-1.46762	0.142207	0.973655		2214.07	0.0898958	1.06429	0.119057	0.755066	0.450209
Y41D4B.11	sart-3	1765.05	1536.09	1918.67	933.012	1042.43	1141.8	1131.47	1130.58	489.776	420.886	428.151	429.384	408.967	321.72	439.589	433.46	520.442		852.44	-0.743557	0.597265	0.151734	-4.90039	9.56452e-07	0.000224377		852.44	-0.621417	0.650032	0.169776	-3.66023	0.000251993	0.0769616		852.44	-0.207589	0.865983	0.159021	-1.30542	0.191751	0.973655		852.44	0.0572582	1.04049	0.158193	0.361951	0.717389
C27H6.3	B0035.15	764.678	656.006	926.942	397.467	428.424	434.579	526.597	541.236	75.198	55.3522	54.7352	59.8478	61.4788	39.5255	67.3244	61.7949	80.4156		307.741	-0.897307	0.536888	0.183489	-4.89026	1.00704e-06	0.000224982		307.741	-0.551726	0.682204	0.204639	-2.69609	0.00701583	0.156976		307.741	-0.209959	0.864562	0.234749	-0.894397	0.37111	0.973655		307.741	0.171757	1.12643	0.228981	0.750096	0.453197
ZK1307.9	pfd-4	1839.71	1499.59	1846.91	1157.88	992.585	1109.78	1155.87	1206.03	310.687	275.717	289.488	256.491	249.479	257.376	374.245	320.617	421.956		797.906	-0.669402	0.628767	0.138577	-4.83054	1.36164e-06	0.000290977		797.906	-0.549796	0.683117	0.155061	-3.54568	0.000391597	0.0775035		797.906	-0.199001	0.871153	0.152445	-1.3054	0.191758	0.973655		797.906	0.349944	1.27451	0.149878	2.33486	0.0195506
Y40B1B.7	ain-2	1817.31	1415.43	2061.2	775.209	872.754	1151.86	1055.23	1069.35	399.737	314.359	408.689	310.639	376.891	322.639	451.47	377.038	484.3		803.771	-0.918599	0.529022	0.190805	-4.81433	1.47693e-06	0.000302464		803.771	-0.73223	0.601973	0.213364	-3.43184	0.000599492	0.085295		803.771	-0.151653	0.900218	0.19792	-0.766233	0.443538	0.973655		803.771	0.225962	1.16956	0.196853	1.14787	0.251023
W10D5.2	lmd-2	3274.14	3330.73	3601.12	2465.68	2339.36	2574.54	2390.02	2629.64	4089.39	3583.27	3904.44	3482.57	3482.01	3601.42	3988.97	3773.07	3785.86		3311.54	-0.467674	0.72313	0.0988949	-4.729	2.25629e-06	0.000443587		3311.54	-0.439	0.737646	0.110736	-3.96438	7.35867e-05	0.0524306		3311.54	-0.131866	0.91265	0.0983293	-1.34106	0.1799	0.973655		3311.54	-0.00372572	0.997421	0.0982598	-0.037917	0.969754
C16A3.4	rpl-4	2693.97	2604.76	2933.32	2005.09	1794.29	1817	1984.4	2170.41	2721.97	2292.42	2448.49	2211.52	2370.05	2294.32	2737.53	2381.34	2779.31		2367.07	-0.551626	0.682251	0.116913	-4.71827	2.37854e-06	0.000449635		2367.07	-0.401667	0.756983	0.130737	-3.07233	0.00212396	0.104704		2367.07	-0.118296	0.921275	0.116722	-1.01349	0.310827	0.973655		2367.07	0.0815549	1.05816	0.116578	0.699572	0.484195
T23G11.4	B0041.5	1512.29	1185.27	1626.63	756.47	845.182	949.67	921.036	953.45	841.03	734.2	774.807	593.729	671.811	668.258	975.214	799.751	1104.13		936.055	-0.760923	0.590119	0.162823	-4.6733	2.96395e-06	0.000520279		936.055	-0.621021	0.650211	0.182156	-3.40927	0.000651364	0.0888987		936.055	-0.281296	0.822852	0.164808	-1.70681	0.0878577	0.973655		936.055	0.292675	1.22491	0.16384	1.78635	0.0740434
ZK1320.12	ptps-1	2590.52	2211.36	2714.05	1450.8	1624.62	1451.04	1819.71	1912.37	919.197	667.359	750.48	648.827	648.645	689.399	989.075	732.583	965.89		1340.35	-0.731715	0.602188	0.156542	-4.67423	2.95054e-06	0.000520279		1340.35	-0.425048	0.744814	0.174877	-2.43056	0.0150755	0.200411		1340.35	-0.234721	0.849849	0.160297	-1.46429	0.143116	0.973655		1340.35	0.200761	1.1493	0.159535	1.25841	0.208243
K10D2.4	xnp-1	1062.23	887.179	1152.2	549.353	539.771	607.496	625.207	689.939	229.552	182.767	201.912	164.344	175.526	216.931	276.228	221.208	367.743		479.387	-0.870079	0.547117	0.188439	-4.61729	3.88783e-06	0.000658921		479.387	-0.653002	0.635956	0.210645	-3.10002	0.0019351	0.104274		479.387	-0.14217	0.906155	0.201775	-0.704599	0.48106	0.973655		479.387	0.493598	1.40795	0.198773	2.48323	0.0130196
F46F11.4	B0041.8	878.793	709.744	982.758	442.836	418.88	512.346	527.614	520.461	499.671	465.794	497.482	395.186	430.351	526.701	662.354	524.809	886.378		581.303	-0.903526	0.534579	0.196884	-4.58912	4.45113e-06	0.000729243		581.303	-0.70979	0.611409	0.220167	-3.22387	0.00126472	0.0983518		581.303	-0.113362	0.924431	0.198482	-0.571144	0.567902	0.973655		581.303	0.503333	1.41748	0.197262	2.55159	0.0107231
Y108G3AL.2	tsp-20	1438.7	1207.58	1363.5	818.605	811.248	839.882	898.671	949.077	814.315	582.765	678.716	607.028	589.84	546.004	830.665	615.262	737.293		842.891	-0.699003	0.615998	0.152878	-4.57231	4.82387e-06	0.000764817		842.891	-0.532811	0.691207	0.170968	-3.11644	0.0018305	0.104274		842.891	-0.252765	0.839287	0.155535	-1.62513	0.104136	0.973655		842.891	0.0717528	1.05099	0.154852	0.463365	0.643103
C56A3.5	B0198.2	1420.57	1327.22	1670.49	900.465	847.303	970.713	988.132	1031.08	321.57	289.294	283.407	261.241	273.536	319.881	385.135	269.569	315.337		698.526	-0.700463	0.615375	0.154404	-4.53657	5.71774e-06	0.000878209		698.526	-0.544877	0.68545	0.172693	-3.15518	0.001604	0.0989731		698.526	-0.0662752	0.955101	0.165403	-0.400689	0.688649	0.974801		698.526	0.114921	1.08292	0.164664	0.697917	0.485229
C30B5.1	B0205.4	1592.28	1489.45	1936.61	948.793	1202.56	932.287	1348.01	1442.2	422.494	357.178	385.579	392.336	364.418	395.255	394.046	331.364	422.859		844.571	-0.703177	0.614218	0.155352	-4.52635	6.00101e-06	0.000893787		844.571	-0.262038	0.833909	0.173249	-1.51249	0.130408	0.434839		844.571	-0.0170205	0.988272	0.163209	-0.104287	0.916942	0.994499		844.571	-0.0218113	0.984995	0.163278	-0.133584	0.893732
C03D6.8	kin-3	3224.02	2942.39	3466.56	1948.87	1919.42	2254.32	2160.27	2305.99	1568.27	1399.47	1486.36	1275.8	1290.16	1553.45	1896.96	1499.2	2005.87		2011.61	-0.65366	0.635666	0.144707	-4.51714	6.26797e-06	0.000906091		2011.61	-0.524017	0.695433	0.161839	-3.23789	0.00120417	0.0983518		2011.61	-0.112749	0.924824	0.146129	-0.771568	0.44037	0.973655		2011.61	0.2782	1.21268	0.145764	1.90856	0.0563183
F53A2.4	B0205.8	1060.1	931.792	1297.72	702.225	697.779	643.177	780.746	813.494	541.228	579.631	561.948	627.927	518.56	539.57	605.92	521.226	672.238		711.487	-0.68747	0.620942	0.15241	-4.51066	6.46273e-06	0.000907551		711.487	-0.4603	0.726835	0.170277	-2.70324	0.00686675	0.15697		711.487	0.00260643	1.00181	0.155078	0.0168071	0.98659	1		711.487	0.096654	1.06929	0.154883	0.624046	0.532597
F54D5.11	B0207.10	2961.66	2540.88	3187.48	1763.45	1660.67	1935.94	1921.37	1914.55	83.1136	55.3522	65.6822	45.5984	55.2418	52.3943	67.3244	51.0479	69.573		1084.2	-0.696944	0.616878	0.155021	-4.49579	6.93119e-06	0.0009463		1084.2	-0.594827	0.662124	0.173411	-3.43015	0.00060324	0.085295		1084.2	-0.416373	0.749306	0.216462	-1.92354	0.054412	0.973655		1084.2	-0.125214	0.916868	0.211367	-0.592403	0.553581
B0513.2	avr-14	2349.49	2015.67	2325.33	1312.73	1310.72	1488.55	1438.48	1588.72	513.523	411.486	429.367	381.886	388.474	384.225	588.099	443.311	669.527		1061.15	-0.702064	0.614692	0.157247	-4.46473	8.0171e-06	0.0010281		1061.15	-0.55924	0.678659	0.175868	-3.1799	0.00147328	0.0983518		1061.15	-0.231088	0.851992	0.165011	-1.40044	0.161381	0.973655		1061.15	0.327611	1.25493	0.163425	2.00465	0.0450004
T09B4.9	B0207.2	1782.12	1503.64	1772.15	1013.89	1023.34	1144.54	1244.31	1247.58	784.632	731.067	701.827	619.378	729.726	557.954	916.8	755.868	1029.14		1032.82	-0.668445	0.629185	0.149673	-4.46603	7.9685e-06	0.0010281		1032.82	-0.436305	0.739025	0.167246	-2.60876	0.00908715	0.173539		1032.82	-0.217844	0.85985	0.152821	-1.42548	0.154018	0.973655		1032.82	0.284417	1.21792	0.151876	1.87269	0.0611119
F37A4.2	gpa-14	1510.16	1169.05	1638.59	843.262	828.215	936.862	921.036	925.022	333.444	246.474	288.272	222.292	250.37	238.992	328.702	291.958	376.779		667.616	-0.726904	0.604199	0.162946	-4.461	8.15787e-06	0.0010281		667.616	-0.64089	0.641317	0.182403	-3.51359	0.000442093	0.0787477		667.616	-0.28721	0.819486	0.174792	-1.64315	0.100351	0.973655		667.616	0.199522	1.14832	0.172632	1.15577	0.247776
C02F5.6	B0207.6	1049.43	1057.52	1177.12	739.703	818.671	742.902	775.663	888.939	689.645	750.91	744.398	721.024	708.342	659.066	706.907	674.37	636.096		796.512	-0.513671	0.700438	0.115654	-4.44146	8.93485e-06	0.00109787		796.512	-0.395967	0.75998	0.129463	-3.05854	0.00222419	0.106358		796.512	-0.0647813	0.95609	0.117393	-0.551834	0.581062	0.973655		796.512	-0.114998	0.923383	0.117573	-0.978102	0.328024
Y18D10A.16	B0207.7	859.596	735.092	790.393	433.959	457.056	480.325	547.945	525.928	156.333	135.77	186.1	131.095	165.725	216.012	207.914	204.192	264.739		382.245	-0.798177	0.575075	0.180573	-4.42024	9.85907e-06	0.00112691		382.245	-0.566047	0.675465	0.201759	-2.80556	0.00502299	0.143577		382.245	0.104618	1.07521	0.196628	0.532062	0.594683	0.973655		382.245	0.504799	1.41893	0.19439	2.59683	0.00940881
F10E9.4	B0207.9	1563.48	1235.97	1790.09	818.605	768.83	1017.37	906.804	985.159	32.6518	21.932	26.7594	24.6991	23.1659	25.7376	34.6523	30.4496	27.1064		549.028	-0.816735	0.567725	0.184695	-4.42208	9.77556e-06	0.00112691		549.028	-0.693626	0.618298	0.206637	-3.35673	0.000788696	0.0956441		549.028	-0.148802	0.901999	0.293917	-0.506271	0.612666	0.973655		549.028	0.173756	1.12799	0.285268	0.609097	0.54246
C18A3.1	otpl-1	628.166	491.751	685.738	318.566	345.708	347.663	401.556	414.401	10.8839	9.39943	8.51436	8.54969	7.12797	16.5456	12.8708	8.0602	10.8425		219.197	-0.835386	0.560433	0.188968	-4.42079	9.83423e-06	0.00112691		219.197	-0.561082	0.677794	0.210937	-2.65995	0.00781519	0.165461		219.197	0.151073	1.1104	0.411394	0.367223	0.713452	0.974801		219.197	0.124043	1.08978	0.413448	0.300022	0.764161
T24H10.4	sre-5	1162.48	1103.14	1673.48	762.388	843.061	653.241	889.522	958.917	225.594	231.853	248.133	239.391	245.024	255.537	199.003	277.629	263.835		601.896	-0.803031	0.573144	0.182338	-4.40409	1.0623e-05	0.00118664		601.896	-0.506858	0.703754	0.203652	-2.48885	0.0128159	0.186892		601.896	0.0695402	1.04938	0.193847	0.358739	0.719791	0.974801		601.896	0.0717811	1.05101	0.193905	0.370187	0.711243
ZC434.4	osm-9	2857.14	2689.93	3225.36	1914.35	1803.83	1977.11	2052.51	2191.19	524.407	444.906	487.751	455.984	415.204	455.923	605.92	516.748	735.486		1373.75	-0.623126	0.649263	0.142269	-4.37993	1.1872e-05	0.00120035		1373.75	-0.462786	0.725584	0.159079	-2.90915	0.00362408	0.129482		1373.75	-0.135182	0.910555	0.150416	-0.898718	0.368803	0.973655		1373.75	0.350607	1.2751	0.149074	2.35189	0.0186781
F42H10.2	faah-1	575.908	541.433	634.905	344.209	335.104	331.195	363.941	399.093	200.858	184.855	206.777	161.494	196.019	199.466	221.775	224.79	354.19		322.118	-0.794255	0.576641	0.181024	-4.38756	1.14627e-05	0.00120035		322.118	-0.614781	0.653029	0.202472	-3.03638	0.00239438	0.110064		322.118	-0.0879834	0.940837	0.19172	-0.458915	0.646295	0.973655		322.118	0.436169	1.35301	0.189036	2.30734	0.0210361
F10C2.2	faah-2	3594.09	2883.59	3636	2116.54	2103.94	2192.11	2433.73	2495.15	1082.46	854.304	913.469	843.57	962.276	865.885	1215.8	899.16	1153.83		1779.17	-0.65727	0.634077	0.150124	-4.37819	1.19669e-05	0.00120035		1779.17	-0.452012	0.731023	0.16782	-2.69343	0.00707216	0.156976		1779.17	-0.0936041	0.937179	0.153339	-0.610439	0.541571	0.973655		1779.17	0.196951	1.14627	0.152932	1.28784	0.197803
C15H11.9	B0218.7	3075.78	2601.72	2933.32	1808.82	1857.92	2031.09	2182.63	2215.24	2010.56	1658.48	1774.64	1558.89	1661.71	1527.71	2165.27	1675.63	2166.7		2053.3	-0.595572	0.661782	0.135848	-4.38411	1.16461e-05	0.00120035		2053.3	-0.384353	0.766123	0.151838	-2.53133	0.0113632	0.185416		2053.3	-0.197315	0.872172	0.136614	-1.44432	0.148649	0.973655		2053.3	0.141868	1.10333	0.136317	1.04072	0.298006
W02B12.10	B0228.1	2304.7	2152.55	2449.92	1517.87	1492.06	1453.78	1534.04	1664.16	0.989447	0	0	1.89993	0	0	0	0	2.71064		857.335	-0.629905	0.646219	0.143552	-4.388	1.14397e-05	0.00120035		857.335	-0.525977	0.694489	0.160602	-3.27504	0.00105646	0.0983518		857.335	0.665218	1.58581	1.56454	0.425186	0.670701	0.974801		857.335	1.26234	2.39884	1.44964	0.870794	0.383867
D2005.3	cpna-2	1551.75	1524.93	1763.18	983.312	904.568	990.841	1009.48	1104.34	592.679	612.007	668.985	554.78	585.385	818.087	727.698	705.715	979.443		945.717	-0.74944	0.594835	0.172895	-4.33464	1.45997e-05	0.0013464		945.717	-0.610312	0.655055	0.193397	-3.15574	0.00160093	0.0989731		945.717	0.0642684	1.04555	0.175838	0.365497	0.714741	0.974801		945.717	0.365586	1.28841	0.175337	2.08505	0.0370651
R03A10.1	trx-1	519.384	427.874	524.27	284.046	277.839	277.216	291.763	321.461	173.153	146.213	141.095	130.145	139.886	184.759	201.973	154.935	242.15		261.069	-0.810333	0.57025	0.186837	-4.33712	1.44362e-05	0.0013464		261.069	-0.678129	0.624975	0.20927	-3.24045	0.0011934	0.0983518		261.069	-0.0198575	0.98633	0.200248	-0.0991645	0.921008	0.994499		261.069	0.37715	1.29877	0.197787	1.90685	0.0565399
F25H8.1	B0228.7	1089.96	954.098	1256.85	646.994	624.608	720.944	756.348	792.719	369.064	347.779	379.497	331.538	338.579	343.78	498.993	339.424	528.574		607.044	-0.727945	0.603763	0.1678	-4.33816	1.43679e-05	0.0013464		607.044	-0.506649	0.703856	0.18752	-2.70184	0.00689568	0.15697		607.044	-0.112386	0.925057	0.174422	-0.64433	0.519362	0.973655		607.044	0.318154	1.24673	0.173062	1.83838	0.0660067
B0280.3	natc-2	1478.16	1291.73	1542.91	879.754	978.8	827.073	1013.55	1106.53	12.8628	14.6213	17.0287	11.3996	10.692	16.5456	14.851	22.3894	25.2993		544.953	-0.68373	0.622554	0.157989	-4.32771	1.50666e-05	0.0013464		544.953	-0.439673	0.737302	0.176511	-2.49091	0.0127417	0.186799		544.953	-0.193379	0.874555	0.352139	-0.549155	0.582899	0.973655		544.953	0.511276	1.42531	0.324258	1.57675	0.114852
C25A1.1	B0238.11	5021.07	4235.14	5837.74	2834.54	3279.99	2834.37	3544.87	3781	462.072	407.309	474.371	381.886	389.365	423.751	514.834	405.697	656.878		2087.35	-0.754281	0.592842	0.17419	-4.33022	1.48958e-05	0.0013464		2087.35	-0.457971	0.72801	0.194692	-2.35228	0.0186587	0.206379		2087.35	-0.16885	0.889551	0.182347	-0.925981	0.354456	0.973655		2087.35	0.23166	1.17418	0.181314	1.27767	0.201366
ZK669.4	B0238.12	1455.77	1392.11	1621.65	960.628	1101.81	919.478	1128.42	1168.85	710.423	797.907	790.619	761.872	787.641	754.662	735.618	809.602	973.119		992.364	-0.584437	0.666909	0.135029	-4.32823	1.5031e-05	0.0013464		992.364	-0.37537	0.770908	0.150884	-2.4878	0.0128536	0.186892		992.364	0.00375392	1.00261	0.137395	0.027322	0.978203	1		992.364	0.132375	1.0961	0.137166	0.96507	0.33451
T03F6.2	B0238.9	1882.37	1618.22	1840.93	1176.62	1273.61	1198.52	1301.24	1413.77	369.064	339.424	294.354	342.938	348.38	305.174	416.817	351.067	378.586		873.593	-0.549939	0.683049	0.127542	-4.31182	1.61915e-05	0.00139616		873.593	-0.39141	0.762384	0.142614	-2.74454	0.00605961	0.151962		873.593	-0.0117396	0.991896	0.139521	-0.0841418	0.932944	0.994546		873.593	0.189698	1.14052	0.138683	1.36785	0.171358
Y80D3A.7	spe-42	103.45	111.531	74.7534	183.446	144.222	184.811	153.506	139.956	185.027	185.9	215.292	209.942	204.929	205.901	188.112	204.192	160.831		167.988	0.826104	1.77289	0.191541	4.31295	1.61093e-05	0.00139616		167.988	0.60541	1.52141	0.215621	2.80775	0.00498884	0.143577		167.988	0.0846409	1.06042	0.179567	0.471362	0.637382	0.973655		167.988	-0.0818142	0.944869	0.180712	-0.452734	0.650741
C48E7.11	ida-1	957.714	736.105	1036.58	478.341	538.711	630.369	661.804	666.978	221.636	183.811	214.075	156.744	175.526	181.082	262.367	207.774	249.379		444.647	-0.728392	0.603576	0.169253	-4.30357	1.68071e-05	0.0013962		444.647	-0.454052	0.72999	0.188963	-2.40286	0.0162676	0.203503		444.647	-0.270633	0.828956	0.18434	-1.46812	0.142072	0.973655		444.647	0.215277	1.16093	0.181501	1.1861	0.235584
C06H2.3	rpl-2	643.097	561.711	660.82	410.289	378.582	411.707	450.352	478.912	462.072	500.259	493.833	435.084	528.361	531.297	450.48	573.17	597.244		503.957	-0.635448	0.643741	0.14773	-4.30141	1.69718e-05	0.0013962		503.957	-0.420733	0.747045	0.164984	-2.55015	0.0107678	0.182712		503.957	0.0384238	1.02699	0.147641	0.260251	0.79467	0.98466		503.957	0.155824	1.11406	0.147343	1.05756	0.290257
D2007.4	calf-1	1233.94	1141.67	1463.17	815.646	740.197	881.967	851.908	880.192	185.027	174.412	184.883	135.845	171.962	195.789	188.112	180.907	208.719		566.726	-0.654718	0.6352	0.152244	-4.30046	1.70441e-05	0.0013962		566.726	-0.563325	0.676741	0.170436	-3.30521	0.000949055	0.0983518		566.726	-0.111057	0.925909	0.172376	-0.644271	0.519399	0.973655		566.726	0.0863914	1.06171	0.17106	0.505037	0.613533
F54C1.2	dhcr-7	868.128	752.328	1030.6	485.245	514.32	523.325	648.588	606.84	793.537	669.448	774.807	613.678	621.915	806.137	945.512	618.844	903.546		716.282	-0.799792	0.574432	0.186575	-4.2867	1.81347e-05	0.00146118		716.282	-0.493392	0.710353	0.208265	-2.36906	0.0178336	0.205487		716.282	-0.132187	0.912447	0.186015	-0.710627	0.477315	0.973655		716.282	0.140936	1.10262	0.185601	0.759351	0.447643
R07E5.7	B0252.1	2687.57	2498.3	3049.94	1737.81	1727.48	1733.74	1909.17	1906.9	1025.07	983.807	1025.37	873.018	925.745	1075.46	1245.5	1055.89	1608.31		1592.3	-0.663693	0.63126	0.155023	-4.28125	1.85847e-05	0.00146264		1592.3	-0.52489	0.695012	0.173369	-3.02758	0.00246516	0.111817		1592.3	-0.0780719	0.947323	0.157438	-0.495889	0.619973	0.973655		1592.3	0.365811	1.28861	0.156893	2.33159	0.0197224
D2096.4	asm-1	1037.7	903.402	1201.04	691.376	699.9	718.2	801.078	727.115	1187.34	1145.69	1160.39	1103.86	1145.82	966.078	1311.84	1237.69	1446.58		1028.53	-0.574875	0.671345	0.134338	-4.2793	1.8748e-05	0.00146264		1028.53	-0.454801	0.729611	0.15036	-3.02475	0.00248838	0.111817		1028.53	-0.119494	0.92051	0.132795	-0.899841	0.368205	0.973655		1028.53	0.193925	1.14387	0.132375	1.46497	0.14293
Y67D2.4	B0252.3	271.957	233.201	296.023	166.68	153.766	154.619	188.07	206.654	199.868	149.346	169.071	144.395	155.924	176.486	168.311	152.248	198.78		187.376	-0.754034	0.592943	0.1764	-4.27456	1.91515e-05	0.00147078		187.376	-0.436982	0.738678	0.19594	-2.23018	0.0257358	0.229761		187.376	-0.121521	0.919218	0.180233	-0.674242	0.500157	0.973655		187.376	0.00163356	1.00113	0.179424	0.00910446	0.992736
B0024.10	cyn-10	738.016	669.187	788.399	417.193	458.116	462.026	518.464	557.637	243.404	195.299	240.835	203.293	220.967	227.961	299.99	219.417	346.962		400.421	-0.715254	0.609098	0.167776	-4.26315	2.01567e-05	0.00152416		400.421	-0.444053	0.735067	0.187253	-2.3714	0.0177206	0.205487		400.421	-0.0583631	0.960353	0.178578	-0.32682	0.743804	0.975947		400.421	0.350612	1.2751	0.176603	1.98532	0.0471092
C47E8.4	B0252.5	2531.86	2107.94	2662.22	1396.56	1563.11	1487.63	1811.57	1756.01	643.141	496.081	631.279	452.184	514.996	490.852	747.499	664.519	1005.65		1233.12	-0.715419	0.609028	0.168651	-4.242	2.21539e-05	0.00164979		1233.12	-0.448357	0.732877	0.188465	-2.37899	0.0173601	0.205487		1233.12	-0.279704	0.82376	0.173997	-1.60752	0.107941	0.973655		1233.12	0.449852	1.3659	0.172517	2.60758	0.00911855
R08D7.5	B0252.8	571.642	458.292	658.827	306.73	317.076	365.962	343.61	345.516	920.186	746.732	875.763	745.723	818.826	897.138	1062.34	816.767	1182.74		672.581	-0.770241	0.586319	0.181973	-4.23271	2.30888e-05	0.00169375		672.581	-0.708259	0.612058	0.204133	-3.4696	0.000521235	0.0821654		672.581	-0.0466085	0.96821	0.177315	-0.262858	0.79266	0.983921		672.581	0.267968	1.20411	0.176903	1.51477	0.129829
F40E10.1	B0261.7	3695.41	4213.85	3311.08	6516.29	5616.17	5821.53	5832.21	5926.26	2920.85	2568.13	2590.8	3220.38	2343.32	2510.33	2966.24	2221.93	2380.84		3803.27	0.678209	1.60015	0.16077	4.2185	2.45935e-05	0.0017776		3803.27	0.652553	1.57195	0.179736	3.63062	0.000282741	0.0769616		3803.27	-0.00122452	0.999152	0.161427	-0.00758563	0.993948	1		3803.27	-0.094482	0.936608	0.161484	-0.585086	0.55849
Y110A7A.13	memb-1	1674.4	1526.96	1807.04	1141.12	1129.38	1130.82	1180.27	1226.8	804.421	838.638	900.089	691.575	785.859	811.653	925.711	944.835	1196.29		1100.93	-0.558281	0.679111	0.132698	-4.20714	2.5862e-05	0.00179031		1100.93	-0.472208	0.720861	0.148532	-3.17916	0.001477	0.0983518		1100.93	-0.151092	0.900569	0.135283	-1.11686	0.264055	0.973655		1100.93	0.270987	1.20663	0.13452	2.01447	0.0439604
C16C10.6	unc-5	3673.01	2771.04	3288.15	1842.35	1925.79	2080.49	2227.36	2114.65	637.204	500.259	548.568	545.28	504.304	421.912	781.161	509.584	640.614		1471.28	-0.734559	0.601002	0.174503	-4.20943	2.56013e-05	0.00179031		1471.28	-0.579366	0.669258	0.195131	-2.96912	0.00298654	0.121595		1471.28	-0.196876	0.872437	0.180328	-1.09177	0.274935	0.973655		1471.28	0.194913	1.14465	0.179497	1.08588	0.27753
C43E11.12	ggtb-1	1160.35	856.762	1175.12	605.57	642.635	617.56	724.833	708.527	1.97889	1.04438	2.43267	0	3.56399	0	1.98013	0	0.903546		382.545	-0.774836	0.584455	0.183926	-4.21275	2.52277e-05	0.00179031		382.545	-0.570111	0.673565	0.205607	-2.77282	0.00555735	0.150138		382.545	-0.549715	0.683155	0.984416	-0.558417	0.57656	0.973655		382.545	-0.94915	0.517938	1.06841	-0.888373	0.37434
C18E9.2	glr-2	3935.37	3427.05	4115.42	2535.7	2590.69	2825.22	2738.71	2837.39	2164.91	2025.05	2116.43	2036.73	2088.5	2054.41	2542.49	2089.38	2769.37		2640.75	-0.529429	0.692829	0.126135	-4.19732	2.70092e-05	0.00184376		2640.75	-0.456589	0.728707	0.141109	-3.23571	0.00121341	0.0983518		2640.75	-0.0292889	0.979903	0.127016	-0.230593	0.817631	0.988417		2640.75	0.230877	1.17355	0.126825	1.82044	0.0686925
Y50D4A.2	rpia-1	1586.95	1431.65	1874.82	1024.74	1086.97	978.947	1215.85	1308.81	466.03	402.087	419.636	422.735	390.256	329.992	523.745	409.279	565.62		849.3	-0.663194	0.631479	0.158238	-4.19112	2.77578e-05	0.0018689		849.3	-0.369948	0.773811	0.176717	-2.09345	0.0363088	0.257413		849.3	-0.172709	0.887175	0.165416	-1.04409	0.296444	0.973655		849.3	0.218031	1.16315	0.16425	1.32744	0.184365
C01B10.8	B0280.7	1245.67	1290.72	1457.19	892.575	979.86	787.732	956.617	1155.73	501.65	424.019	400.175	421.785	384.019	398.932	435.629	405.697	427.377		739.14	-0.58689	0.665777	0.140364	-4.1812	2.8998e-05	0.00192601		739.14	-0.334349	0.793142	0.156742	-2.13312	0.0329151	0.248695		739.14	-0.140039	0.907494	0.147246	-0.951056	0.341576	0.973655		739.14	-0.0654035	0.955678	0.147027	-0.444841	0.656434
B0334.4	nhr-10	3178.16	2781.18	3333	2041.58	1881.25	2093.3	2011.84	2187.91	188.984	133.681	180.018	131.095	147.014	159.941	217.814	171.055	220.465		1238.72	-0.627094	0.647479	0.150554	-4.16524	3.1103e-05	0.00201146		1238.72	-0.560844	0.677906	0.168439	-3.32965	0.000869566	0.0968071		1238.72	-0.197397	0.872123	0.175904	-1.12218	0.261785	0.973655		1238.72	0.277387	1.212	0.17248	1.60823	0.107786
ZK265.6	lcmt-1	1599.74	1353.58	1672.48	960.628	861.089	1163.76	1002.36	1014.68	539.249	456.395	467.073	432.234	446.389	483.499	562.357	517.644	646.035		834.071	-0.631097	0.645685	0.151466	-4.16658	3.09204e-05	0.00201146		834.071	-0.61251	0.654058	0.169679	-3.60981	0.000306417	0.0769616		834.071	-0.103453	0.930802	0.157283	-0.657754	0.510696	0.973655		834.071	0.238149	1.17948	0.156374	1.52294	0.127773
C29H12.1	hse-5	1402.44	1154.85	1568.82	812.687	832.457	757.54	914.937	939.236	225.594	218.276	248.133	171.944	191.564	148.91	272.268	199.714	352.383		612.457	-0.780318	0.582239	0.187626	-4.1589	3.19777e-05	0.00204118		612.457	-0.569098	0.674038	0.209739	-2.71337	0.00666028	0.1561		612.457	-0.432139	0.741162	0.202048	-2.13879	0.0324526	0.973655		612.457	0.253427	1.19204	0.198581	1.27619	0.20189
C56A3.4	mnp-1	1226.47	1187.3	1536.93	782.113	810.187	688.008	835.642	886.752	380.937	377.022	446.396	333.438	307.394	397.094	413.847	375.247	619.832		682.624	-0.793247	0.577044	0.191547	-4.14126	3.45409e-05	0.00217652		682.624	-0.612892	0.653884	0.214188	-2.86147	0.00421679	0.134729		682.624	-0.213723	0.862309	0.197398	-1.0827	0.278943	0.973655		682.624	0.227595	1.17088	0.196199	1.16002	0.24604
T05G5.9	B0286.1	1291.53	1094.02	1359.52	746.607	863.21	833.477	944.418	979.692	227.573	193.21	192.181	208.992	206.711	214.173	244.546	229.268	316.241		596.786	-0.616254	0.652362	0.149177	-4.13103	3.61142e-05	0.002231		596.786	-0.375894	0.770628	0.166628	-2.25589	0.0240776	0.224707		596.786	0.0373297	1.02621	0.165979	0.224906	0.822052	0.989045		596.786	0.364749	1.28766	0.164185	2.22157	0.0263124
Y62E10A.10	lat-2	3769	3678.5	3981.86	2685.62	2513.28	2827.05	2714.31	2743.36	1875	1656.39	1902.35	1800.18	1650.13	1918.37	2018.74	1859.22	2374.52		2468.7	-0.509878	0.702282	0.123464	-4.12977	3.63134e-05	0.002231		2468.7	-0.481451	0.716257	0.138166	-3.48458	0.000492917	0.0821654		2468.7	-0.0172795	0.988094	0.124789	-0.13847	0.889869	0.993187		2468.7	0.202678	1.15083	0.124599	1.62664	0.103814
K08D10.2	paic-1	1098.49	926.722	1112.33	572.037	522.804	723.689	683.153	697.593	44.5251	29.2427	24.3267	27.549	24.0569	40.4447	37.6225	38.5098	45.1773		391.075	-0.78612	0.579902	0.191103	-4.11359	3.89554e-05	0.00233495		391.075	-0.59923	0.660106	0.21368	-2.80433	0.00504219	0.143577		391.075	-0.108452	0.927583	0.279564	-0.387934	0.698065	0.974801		391.075	0.291996	1.22433	0.270681	1.07874	0.280702
R10E11.4	ntl-2	858.53	826.344	1007.68	573.023	601.278	549.857	662.821	705.247	326.518	315.403	341.791	291.639	318.086	326.316	336.622	274.047	421.052		513.897	-0.643521	0.640149	0.156338	-4.11623	3.85125e-05	0.00233495		513.897	-0.392148	0.761994	0.174554	-2.24657	0.0246675	0.226149		513.897	-0.0709003	0.952044	0.163684	-0.433153	0.664904	0.974801		513.897	0.0693183	1.04922	0.163163	0.42484	0.670953
T04G9.2	try-9	53.3248	52.7238	50.8323	83.833	91.1991	90.5755	82.3443	71.0714	1480.21	1531.06	1525.29	1537.04	1668.84	1615.03	1424.7	1571.74	1343.57		839.611	0.759992	1.69348	0.185242	4.1027	4.08361e-05	0.00241819		839.611	0.555511	1.46969	0.210046	2.64471	0.00817598	0.168364		839.611	0.0878635	1.0628	0.117822	0.745731	0.45583	0.973655		839.611	-0.0637492	0.956774	0.118028	-0.540119	0.589115
T23D8.3	B0302.5	4055.89	3712.97	4122.4	2655.04	2774.15	2926.78	3087.4	3135.89	2910.95	2582.75	2673.51	2468.96	2542.9	2177.58	3200.88	2479.86	2729.61		2955.15	-0.508956	0.702731	0.124182	-4.09847	4.15899e-05	0.0024335		2955.15	-0.349196	0.785022	0.138842	-2.51506	0.0119013	0.185416		2955.15	-0.184059	0.880223	0.124652	-1.47658	0.139789	0.973655		2955.15	0.042009	1.02955	0.124507	0.337404	0.735813
R11A8.5	B0303.11	1719.19	1579.69	1841.92	1262.43	1092.27	1267.14	1299.21	1297.87	566.953	581.72	514.511	546.23	505.195	500.044	594.039	523.017	634.289		960.337	-0.50492	0.704699	0.123295	-4.09521	4.21791e-05	0.00243895		960.337	-0.400166	0.757771	0.137967	-2.90044	0.00372644	0.129482		960.337	-0.101453	0.932094	0.129642	-0.782567	0.433882	0.973655		960.337	0.0733957	1.05219	0.129141	0.568338	0.569806
Y75B8A.18	mrpl-11	1101.69	937.875	1272.8	531.6	554.618	634.028	632.323	648.39	697.56	469.971	651.957	407.535	450.844	568.065	832.645	595.559	1161.06		714.619	-0.945064	0.519407	0.231156	-4.08842	4.34328e-05	0.00248223		714.619	-0.786013	0.579945	0.258558	-3.03998	0.00236592	0.110064		714.619	-0.350942	0.784072	0.232757	-1.50776	0.131617	0.973655		714.619	0.509108	1.42317	0.231476	2.1994	0.0278495
Y49A3A.3	B0303.16	702.821	720.897	830.261	506.943	482.507	490.389	519.481	534.676	621.373	642.294	633.712	637.427	624.588	820.845	633.642	782.735	812.288		646.875	-0.607176	0.65648	0.148691	-4.08348	4.43653e-05	0.00250639		646.875	-0.511729	0.701381	0.166576	-3.07205	0.00212595	0.104704		646.875	0.134606	1.09779	0.147922	0.909978	0.362834	0.973655		646.875	0.232781	1.1751	0.147748	1.57553	0.115134
C30B5.4	anmt-1	2038.07	1627.34	2346.26	1023.75	1148.47	1169.25	1291.08	1373.32	1024.08	709.135	894.008	670.676	719.034	682.965	1235.6	794.378	1430.31		1186.93	-0.847283	0.55583	0.208593	-4.0619	4.86752e-05	0.0026582		1186.93	-0.589053	0.664779	0.233143	-2.52658	0.0115181	0.185416		1186.93	-0.342099	0.788893	0.21053	-1.62494	0.104175	0.973655		1186.93	0.397142	1.3169	0.209662	1.8942	0.0581984
Y54H5A.1	B0303.3	2424.15	2312.75	2706.07	1688.5	1633.1	1717.27	1777.01	1915.65	395.779	357.178	392.877	395.186	373.327	382.387	452.46	337.633	489.722		1161.83	-0.562742	0.677014	0.138484	-4.06357	4.83272e-05	0.0026582		1161.83	-0.426376	0.744129	0.154873	-2.75306	0.00590405	0.151962		1161.83	0.00644917	1.00448	0.148704	0.0433693	0.965407	0.999826		1161.83	0.159254	1.11671	0.148193	1.07464	0.282535
F45G2.8	B0303.4	417	386.303	434.566	235.719	208.91	296.429	278.547	272.258	280.014	297.649	305.301	232.742	241.46	263.81	284.149	279.42	412.92		301.6	-0.738178	0.599496	0.181499	-4.06713	4.75961e-05	0.0026582		301.6	-0.583206	0.667479	0.203157	-2.87072	0.00409538	0.131792		301.6	-0.258006	0.836243	0.183293	-1.40762	0.159244	0.973655		301.6	0.146483	1.10687	0.18161	0.80658	0.419909
T25G3.1	B0303.7	887.325	721.911	1000.7	431.987	461.298	506.857	521.514	594.813	298.813	226.631	300.435	238.441	288.683	273.002	384.145	272.256	545.742		467.915	-0.898265	0.536532	0.22198	-4.0466	5.19679e-05	0.00271726		467.915	-0.640498	0.641491	0.248038	-2.58226	0.0098157	0.178466		467.915	-0.0449335	0.969335	0.228281	-0.196834	0.843957	0.991268		467.915	0.542139	1.45613	0.226559	2.39293	0.0167145
C34E10.10	vps-33.1	1132.62	929.764	1129.27	591.763	667.026	748.391	706.534	788.346	772.758	672.581	733.451	678.275	641.517	739.955	1007.89	719.149	1027.33		805.096	-0.668767	0.629044	0.165227	-4.04757	5.17527e-05	0.00271726		805.096	-0.509464	0.702484	0.184791	-2.75697	0.00583392	0.151962		805.096	-0.0811743	0.945288	0.166048	-0.488862	0.62494	0.973655		805.096	0.337857	1.26388	0.165362	2.04313	0.0410394
F26A3.7	B0304.2	1192.34	837.497	1183.1	601.625	635.212	584.624	749.232	743.516	337.402	252.74	300.435	230.842	251.261	276.679	389.096	274.942	483.397		548.467	-0.818894	0.566876	0.202127	-4.05139	5.09135e-05	0.00271726		548.467	-0.520886	0.696943	0.225752	-2.30734	0.0210357	0.213325		548.467	-0.23119	0.851932	0.210036	-1.10072	0.27102	0.973655		548.467	0.365163	1.28803	0.208034	1.7553	0.0792077
R01H2.6	cyp-23A1	10535.9	8869.77	10868.1	5816.04	5881.28	5724.55	6275.45	6713.51	4990.77	4053.24	5270.39	4025.95	3629.03	5454.53	5774.06	4301.46	7137.11		6195.37	-0.797176	0.575475	0.196658	-4.05362	5.0432e-05	0.00271726		6195.37	-0.635831	0.64357	0.219879	-2.89173	0.00383131	0.129482		6195.37	-0.126808	0.915856	0.19695	-0.643856	0.519669	0.973655		6195.37	0.266048	1.20251	0.196865	1.35142	0.17656
C33H5.10	sra-35	1731.99	1531.02	1867.84	1049.39	1070	1135.4	1170.1	1198.37	788.59	735.244	754.129	622.228	715.47	750.066	971.254	815.871	1291.17		1070.48	-0.656547	0.634395	0.162578	-4.03834	5.38305e-05	0.0027672		1070.48	-0.530318	0.692402	0.181862	-2.91605	0.00354497	0.129482		1070.48	-0.125749	0.916528	0.1652	-0.761197	0.446539	0.973655		1070.48	0.434352	1.3513	0.164324	2.64327	0.00821092
F33D4.5	B0310.1	1984.75	1639.51	1932.62	1271.3	1209.98	1364.12	1350.04	1296.78	1104.22	999.473	1005.91	882.518	1025.54	1109.47	1268.27	1157.98	1366.16		1292.27	-0.530816	0.692163	0.131475	-4.03739	5.4049e-05	0.0027672		1292.27	-0.484923	0.714535	0.147217	-3.29393	0.000987983	0.0983518		1292.27	-0.0435158	0.970288	0.133141	-0.326841	0.743788	0.975947		1292.27	0.286043	1.21929	0.132673	2.156	0.0310835
F33G12.2	ttr-18	709.22	606.324	728.596	422.124	421	423.601	430.02	498.593	3428.44	3982.22	4000.53	3700.12	3943.55	5316.65	3624.63	4734.92	4463.52		2437.3	-0.690335	0.61971	0.171301	-4.02995	5.57883e-05	0.0028268		2437.3	-0.553759	0.681243	0.191722	-2.88835	0.00387267	0.129482		2437.3	0.183755	1.13584	0.164389	1.11781	0.263649	0.973655		2437.3	0.168465	1.12386	0.164398	1.02474	0.305486
DY3.4	ooc-3	995.041	939.903	1092.4	654.884	706.263	724.604	788.879	827.708	120.713	106.527	115.552	88.3468	77.5167	78.1319	146.53	111.052	130.111		453.186	-0.537467	0.68898	0.1341	-4.00796	6.12461e-05	0.00307168		453.186	-0.320344	0.800879	0.149765	-2.13897	0.0324377	0.247192		453.186	-0.491772	0.711151	0.175209	-2.80677	0.00500407	0.973655		453.186	0.174825	1.12883	0.166862	1.04772	0.294766
C14B1.9	emc-5	1516.56	1368.79	1939.6	796.907	874.875	760.285	955.601	1045.3	13.8523	24.0208	25.5431	18.9993	23.1659	18.384	27.7218	26.8673	66.8624		559.019	-0.988514	0.503996	0.247182	-3.99913	6.35759e-05	0.00315632		559.019	-0.685006	0.622003	0.276233	-2.47981	0.0131452	0.187061		559.019	-0.0518962	0.964668	0.356547	-0.145552	0.884275	0.993187		559.019	0.955025	1.93861	0.333795	2.86111	0.00422158
Y65B4BL.3	B0334.4	300.752	285.925	381.741	177.529	180.277	147.3	222.635	227.428	466.03	381.199	468.29	416.085	394.711	539.57	516.814	471.97	875.536		379.635	-0.940289	0.521128	0.23542	-3.9941	6.49403e-05	0.00316517		379.635	-0.520865	0.696954	0.261762	-1.98984	0.0466086	0.281367		379.635	0.0379215	1.02663	0.228651	0.165849	0.868276	0.993187		379.635	0.503517	1.41767	0.227818	2.21018	0.027093
ZC262.8	B0334.5	903.323	816.205	1048.54	545.408	542.953	696.242	595.725	645.11	286.94	259.006	245.7	259.341	263.735	295.063	288.109	274.942	347.865		489.071	-0.632556	0.645032	0.158387	-3.99373	6.50421e-05	0.00316517		489.071	-0.5729	0.672264	0.177474	-3.22807	0.00124627	0.0983518		489.071	0.0460892	1.03246	0.168364	0.273747	0.784279	0.982663		489.071	0.201305	1.14974	0.167718	1.20026	0.23004
F26F4.13	B0334.6	1344.85	1191.36	1567.83	643.049	680.812	862.754	830.559	779.599	570.911	368.667	441.53	326.788	345.707	398.932	725.718	462.118	882.764		730.82	-0.90806	0.532901	0.227548	-3.99064	6.58964e-05	0.0031753		730.82	-0.764853	0.588513	0.254523	-3.00505	0.00265541	0.117514		730.82	-0.366782	0.77551	0.231812	-1.58224	0.113595	0.973655		730.82	0.583543	1.49852	0.229966	2.53752	0.0111641
C17G10.2	wrm-1	1002.51	894.277	1340.58	639.104	664.905	615.73	831.576	845.203	222.626	151.435	193.398	191.893	177.308	227.961	257.417	199.714	189.745		508.551	-0.754207	0.592872	0.189418	-3.98171	6.84205e-05	0.00326492		508.551	-0.364322	0.776834	0.211319	-1.72404	0.084701	0.357002		508.551	0.0729287	1.05185	0.20328	0.35876	0.719774	0.974801		508.551	0.187124	1.13849	0.202754	0.922912	0.356053
T04H1.5	hpo-28	1179.55	929.764	1213	565.133	579.008	677.944	669.937	663.698	254.288	206.787	233.537	194.743	213.839	219.689	287.119	255.24	505.082		520.491	-0.866303	0.548551	0.217839	-3.97681	6.9847e-05	0.00330094		520.491	-0.731826	0.602141	0.243709	-3.00287	0.00267444	0.117626		520.491	-0.144874	0.904458	0.227978	-0.635475	0.525119	0.973655		520.491	0.592877	1.50825	0.225329	2.63116	0.00850928
Y54G11A.2	B0336.13	1206.21	1144.71	1455.2	792.962	792.16	822.499	908.837	908.621	441.294	385.377	408.689	370.487	316.304	418.235	445.529	383.307	576.462		692.758	-0.660731	0.632558	0.166672	-3.96426	7.36249e-05	0.00344635		692.758	-0.481535	0.716215	0.186349	-2.58405	0.00976469	0.178466		692.758	-0.161389	0.894164	0.172979	-0.932997	0.350821	0.973655		692.758	0.185796	1.13744	0.171946	1.08055	0.279897
F57B10.8	abi-1	1066.5	848.65	1278.78	575.982	571.585	673.369	689.252	647.296	216.689	191.122	215.292	158.644	150.578	158.102	237.616	195.236	355.997		484.158	-0.810388	0.570229	0.204835	-3.95629	7.61236e-05	0.00352969		484.158	-0.671823	0.627713	0.229156	-2.93172	0.00337089	0.127077		484.158	-0.414921	0.750061	0.218801	-1.89634	0.0579156	0.973655		484.158	0.340886	1.26653	0.215008	1.58546	0.112862
C15F1.5	B0336.7	55.4578	47.6542	46.8455	25.643	21.2091	23.7875	28.4647	40.456	2937.67	2270.48	2565.26	2349.27	2173.14	2081.07	3465.23	2444.03	2407.95		1351.98	-1.08204	0.472359	0.273691	-3.95353	7.70081e-05	0.00353734		1351.98	-0.540326	0.687615	0.292936	-1.84452	0.0651077	0.325379		1351.98	-0.235418	0.849439	0.179641	-1.31049	0.190029	0.973655		1351.98	0.0973109	1.06978	0.179481	0.542179	0.587695
F43C1.3	lgg-3	347.678	304.176	403.668	203.172	183.459	227.811	239.917	213.214	146.438	153.524	158.124	138.695	110.484	166.375	173.261	149.562	224.983		208.502	-0.779496	0.58257	0.197411	-3.9486	7.8608e-05	0.00357739		208.502	-0.634655	0.644095	0.221082	-2.87067	0.00409602	0.131792		208.502	-0.1404	0.907268	0.207692	-0.676	0.499041	0.973655		208.502	0.259146	1.19677	0.205077	1.26365	0.206356
C46A5.6	swp-1	549.246	482.626	731.587	335.332	300.109	311.067	358.859	414.401	386.874	268.406	315.031	270.74	259.28	342.861	469.291	300.019	533.092		389.931	-0.897788	0.536709	0.227665	-3.94346	8.03132e-05	0.00362146		389.931	-0.604865	0.657533	0.254193	-2.37955	0.0173337	0.205487		389.931	-0.153298	0.899192	0.230143	-0.666099	0.505348	0.973655		389.931	0.423777	1.34143	0.2286	1.85379	0.0637692
B0303.15	wrt-9	1217.94	1059.55	1295.73	801.838	726.411	863.669	803.111	857.23	548.154	500.259	574.111	507.282	503.413	537.731	618.791	576.752	789.699		751.862	-0.578581	0.669622	0.146923	-3.93798	8.21697e-05	0.00365867		751.862	-0.520925	0.696925	0.164569	-3.16538	0.0015488	0.0989731		751.862	-0.0669235	0.954672	0.150851	-0.443639	0.657303	0.974688		751.862	0.291807	1.22417	0.14998	1.94565	0.0516971
F11A10.7	B0348.5	1898.36	1644.58	1888.77	1103.64	1093.33	1394.31	1304.29	1250.86	819.263	689.291	728.586	607.978	679.83	656.308	1011.85	740.643	870.114		1081.29	-0.596441	0.661384	0.15151	-3.93665	8.26271e-05	0.00365867		1081.29	-0.502953	0.705661	0.169529	-2.96676	0.00300959	0.121804		1081.29	-0.20275	0.868893	0.154862	-1.30923	0.190456	0.973655		1081.29	0.228512	1.17163	0.154063	1.48324	0.13801
K10D2.5	ife-3	413.801	375.15	555.169	242.623	240.723	270.812	261.265	288.659	181.069	129.503	165.422	127.295	128.303	151.668	226.725	142.397	230.404		242.999	-0.8335	0.561166	0.21198	-3.93197	8.42518e-05	0.00367925		242.999	-0.704973	0.613454	0.237408	-2.96945	0.0029833	0.121595		242.999	-0.224997	0.855597	0.223733	-1.00565	0.314585	0.973655		242.999	0.331831	1.25861	0.220418	1.50546	0.132206
Y39G10AR.32	B0353.1	887.325	622.546	927.939	450.726	451.754	505.027	475.767	511.714	119.723	90.8611	115.552	91.1967	89.0996	137.88	108.907	117.321	144.567		343.994	-0.792112	0.577498	0.201503	-3.93101	8.45891e-05	0.00367925		343.994	-0.718887	0.607566	0.225688	-3.18531	0.001446	0.0983518		343.994	-0.0351138	0.975955	0.226249	-0.155199	0.876664	0.993187		343.994	0.186801	1.13824	0.224463	0.832212	0.405289
Y67D2.3	B0361.3	1446.17	1379.94	1729.3	892.575	975.618	967.968	1061.33	1191.81	1379.29	1210.44	1387.84	1146.61	1177.9	1588.38	1386.09	1442.78	1937.2		1311.84	-0.683727	0.622555	0.174172	-3.92558	8.65205e-05	0.00373025		1311.84	-0.430883	0.741808	0.194607	-2.21412	0.0268208	0.231918		1311.84	-0.0235424	0.983814	0.173779	-0.135473	0.892238	0.993187		1311.84	0.261154	1.19844	0.173539	1.50487	0.132357
ZK632.13	B0361.4	1881.3	1638.49	2120.01	965.559	1005.31	1122.59	1175.19	1249.76	2064.98	2056.39	2304.96	1646.29	1961.97	2348.55	2418.73	2323.13	4362.32		1920.32	-0.866332	0.54854	0.221079	-3.91865	8.90454e-05	0.00377291		1920.32	-0.632783	0.644931	0.247135	-2.56048	0.0104529	0.182581		1920.32	-0.109321	0.927024	0.22024	-0.496372	0.619632	0.973655		1920.32	0.502703	1.41687	0.219993	2.28509	0.0223074
T21B10.5	psd-1	2462.54	2220.48	2642.28	1603.68	1541.9	1569.06	1792.26	1871.91	492.745	484.593	504.78	408.485	446.389	474.307	541.566	497.941	798.734		1197.27	-0.635732	0.643614	0.162224	-3.91884	8.89751e-05	0.00377291		1197.27	-0.414485	0.750287	0.181322	-2.2859	0.0222598	0.216078		1197.27	-0.156803	0.897011	0.168969	-0.928	0.353408	0.973655		1197.27	0.311183	1.24072	0.167816	1.85431	0.0636947
B0336.8	B0361.6	1583.75	1391.1	1706.37	1006.98	907.749	926.798	1046.08	1143.7	355.212	338.379	357.603	292.589	275.318	347.457	398.006	334.946	587.305		764.667	-0.720194	0.607016	0.183887	-3.91649	8.98457e-05	0.00377429		764.667	-0.511237	0.701621	0.205556	-2.48709	0.0128792	0.186892		764.667	-0.199559	0.870816	0.192018	-1.03927	0.298677	0.973655		764.667	0.329201	1.25632	0.190379	1.72919	0.0837757
C30G12.7	pho-5	1322.46	1202.51	1542.91	825.509	853.666	693.497	966.783	1057.32	121.702	154.568	162.989	145.345	153.251	159.941	211.874	165.682	306.302		590.959	-0.77812	0.583126	0.198798	-3.91412	9.07328e-05	0.00377925		590.959	-0.422159	0.746307	0.221973	-1.90185	0.0571906	0.308384		590.959	0.0648131	1.04595	0.217806	0.297572	0.76603	0.979046		590.959	0.641583	1.56004	0.214692	2.98839	0.00280452
T12D8.3	algn-11	1191.28	1115.31	1363.5	842.275	915.172	736.498	950.518	1043.11	335.423	280.938	282.19	267.89	280.664	317.124	369.294	325.095	369.55		646.225	-0.558085	0.679203	0.142788	-3.90849	9.28744e-05	0.00381665		646.225	-0.295723	0.814664	0.15941	-1.85511	0.0635801	0.322361		646.225	-0.0551629	0.962486	0.153938	-0.358344	0.720086	0.974801		646.225	0.24186	1.18252	0.152657	1.58434	0.113117
C35D10.6	B0361.9	1260.6	1042.31	1349.55	744.635	765.648	869.159	820.393	859.417	156.333	124.281	125.283	107.346	105.138	116.738	161.381	128.068	177.998		524.369	-0.61793	0.651605	0.158132	-3.90769	9.31838e-05	0.00381665		524.369	-0.53569	0.689829	0.177029	-3.026	0.00247811	0.111817		524.369	-0.305161	0.809352	0.186825	-1.6334	0.102384	0.973655		524.369	0.200066	1.14875	0.182283	1.09755	0.272399
ZK783.2	eat-6	1078.23	1123.42	1278.78	738.717	779.434	753.881	863.09	832.082	90.0397	105.482	91.2253	100.696	95.3366	109.385	58.4138	88.6622	104.811		487.746	-0.615498	0.652704	0.157722	-3.90242	9.52343e-05	0.0038684		487.746	-0.452934	0.730556	0.176372	-2.56807	0.0102268	0.181258		487.746	0.0899778	1.06435	0.193555	0.46487	0.642025	0.973655		487.746	-0.182359	0.881261	0.197082	-0.925299	0.354811
T07D4.5	dhc-3	1663.73	1222.79	1650.55	735.758	692.477	880.138	932.219	870.351	426.452	328.98	451.261	284.99	352.835	382.387	581.168	430.773	980.347		756.895	-0.974618	0.508875	0.250454	-3.89141	9.96621e-05	0.00399685		756.895	-0.746672	0.595977	0.279994	-2.66674	0.00765906	0.164589		756.895	-0.241563	0.845829	0.25517	-0.946673	0.343805	0.973655		756.895	0.723941	1.65169	0.253389	2.85703	0.00427622
F48C1.5	B0379.1	1087.83	749.286	1049.54	511.875	493.111	545.283	578.443	622.148	232.52	271.539	255.431	218.492	228.095	276.679	314.841	283.003	567.427		487.385	-0.896633	0.537139	0.230912	-3.88301	0.00010317	0.00399685		487.385	-0.680706	0.62386	0.258144	-2.63693	0.00836607	0.169236		487.385	-0.0701591	0.952533	0.238475	-0.294199	0.768606	0.979046		487.385	0.618287	1.53505	0.236395	2.61548	0.0089102
Y69A2AR.21	scpl-1	3502.37	2685.87	3485.5	1723.02	1694.61	1943.26	1947.8	1988.91	680.74	533.679	679.932	492.082	493.612	614.944	876.208	608.993	1252.31		1482.58	-0.851514	0.554203	0.218949	-3.8891	0.000100618	0.00399685		1482.58	-0.712119	0.610423	0.244841	-2.9085	0.00363167	0.129482		1482.58	-0.242862	0.845067	0.222982	-1.08915	0.276087	0.973655		1482.58	0.531363	1.44529	0.221882	2.3948	0.0166296
B0361.6	rps-0	2178.85	1862.57	2431.98	1316.67	1303.3	1259.82	1398.84	1622.61	258.246	214.098	255.431	223.242	196.91	254.618	326.722	217.625	388.525		924.121	-0.738593	0.599324	0.190201	-3.88322	0.00010308	0.00399685		924.121	-0.514438	0.700066	0.21261	-2.41963	0.0155361	0.201664		924.121	-0.108978	0.927244	0.203103	-0.536567	0.591566	0.973655		924.121	0.358174	1.2818	0.201214	1.78007	0.0750649
Y66D12A.10	rbg-3	924.652	744.217	932.922	513.847	593.855	574.56	615.041	650.577	204.816	219.32	218.941	160.544	160.379	182.001	230.685	194.34	294.556		436.191	-0.629154	0.646555	0.162038	-3.88276	0.000103276	0.00399685		436.191	-0.454766	0.729629	0.181173	-2.51012	0.0120692	0.185416		436.191	-0.354029	0.782396	0.177548	-1.99399	0.0461533	0.973655		436.191	0.162943	1.11957	0.174368	0.93448	0.350056
T20B12.1	B0393.7	806.271	845.609	972.791	635.159	611.882	617.56	682.136	696.5	411.61	404.175	390.444	441.734	423.223	390.659	440.579	371.665	355.997		558.706	-0.493516	0.710292	0.127032	-3.88498	0.000102339	0.00399685		558.706	-0.344294	0.787693	0.14207	-2.42341	0.0153754	0.201664		558.706	0.0571896	1.04044	0.132715	0.430921	0.666526	0.974801		558.706	-0.047882	0.967355	0.133211	-0.359445	0.719263
ZK686.4	B0393.9	1947.42	1340.4	2041.27	942.875	1188.77	982.607	1273.8	1335.05	1030.01	897.123	1036.32	913.867	768.93	838.309	1284.11	945.73	1567.65		1196.13	-0.775213	0.584302	0.200135	-3.87346	0.000107303	0.00409745		1196.13	-0.445527	0.734316	0.223571	-1.99277	0.0462862	0.280417		1196.13	-0.233223	0.850732	0.20128	-1.1587	0.246579	0.973655		1196.13	0.357825	1.28149	0.200658	1.78326	0.0745445
B0238.11	nhx-1	8915.91	7629.74	8904.62	5165.1	5504.82	5703.51	5709.21	6060.75	3072.23	2363.43	2849.88	2377.76	2153.54	2812.75	3653.34	2615.09	3671.11		4656.64	-0.636308	0.643357	0.164393	-3.87066	0.000108543	0.00409745		4656.64	-0.527619	0.693699	0.183821	-2.8703	0.00410089	0.131792		4656.64	-0.174052	0.88635	0.165374	-1.05248	0.29258	0.973655		4656.64	0.262497	1.19955	0.165174	1.58921	0.112012
W06E11.4	mboa-1	863.862	768.551	1035.58	536.531	557.799	582.794	517.448	583.879	746.043	708.09	671.418	534.831	627.261	689.399	724.728	708.402	1011.97		698.152	-0.669751	0.628615	0.173113	-3.86886	0.000109343	0.00409745		698.152	-0.691938	0.619022	0.194225	-3.56256	0.000367255	0.0769616		698.152	-0.199358	0.870938	0.173313	-1.15027	0.250031	0.973655		698.152	0.201921	1.15023	0.172611	1.1698	0.242081
K01C8.9	B0395.3	7173.26	6440.42	7398.59	4674.92	4949.14	4690.71	5152.11	5285.53	3536.29	2992.15	2845.01	2886.95	2804.86	2663.84	3497.9	2823.76	2439.57		4250.29	-0.553752	0.681246	0.143099	-3.86971	0.000108963	0.00409745		4250.29	-0.424482	0.745106	0.160007	-2.6529	0.0079804	0.167016		4250.29	-0.166073	0.891265	0.143881	-1.15424	0.248402	0.973655		4250.29	-0.0978715	0.934411	0.143853	-0.68036	0.496277
Y62F5A.1	kcnl-1	1896.23	1601.99	1680.46	1129.28	1132.57	1177.48	1285.99	1427.99	48.4829	34.4646	37.7065	33.2488	26.7299	29.4144	40.5927	25.9718	45.1773		685.516	-0.590294	0.664208	0.152637	-3.86731	0.000110043	0.00409745		685.516	-0.347243	0.786085	0.170534	-2.03621	0.0417297	0.271332		685.516	-0.441054	0.736596	0.249505	-1.76771	0.0771092	0.973655		685.516	-0.120085	0.920133	0.241126	-0.49802	0.61847
Y106G6H.16	ubc-17	477.79	353.858	529.254	217.966	244.965	245.194	258.215	326.928	228.562	207.832	215.292	151.995	176.417	185.678	292.069	222.999	487.011		283.649	-0.942489	0.520334	0.245125	-3.84493	0.000120585	0.00445619		283.649	-0.633249	0.644723	0.273575	-2.31472	0.0206285	0.212396		283.649	-0.342108	0.788888	0.250594	-1.36519	0.172195	0.973655		283.649	0.620805	1.53773	0.24699	2.51349	0.0119545
Y106G6H.8	B0403.3	848.931	822.289	980.765	535.545	574.766	496.793	573.36	673.538	613.457	592.164	728.586	721.974	514.996	717.894	667.304	621.531	927.941		683.049	-0.723062	0.60581	0.188298	-3.83999	0.000123041	0.00447962		683.049	-0.504129	0.705086	0.210433	-2.39567	0.0165898	0.204031		683.049	0.0157809	1.011	0.188463	0.0837348	0.933267	0.994546		683.049	0.197626	1.14681	0.188179	1.05021	0.293624
C17G10.1	B0403.5	1843.97	1705.41	1871.82	1200.29	1229.07	1261.65	1306.33	1460.79	0	1.04438	0	0	0	0	0	0	0		698.846	-0.554542	0.680873	0.144365	-3.84126	0.000122404	0.00447962		698.846	-0.385409	0.765562	0.161403	-2.38787	0.0169464	0.204649		698.846	-1.19246	0.437556	1.67184	-0.713264	0.475683	0.973655		698.846	-1.17837	0.44185	1.67184	-0.704836	0.480912
F39H2.3	B0403.6	1424.84	1387.04	1782.12	892.575	890.782	909.415	946.451	961.104	487.798	516.969	572.895	420.835	464.209	503.721	659.383	583.917	1082.45		852.147	-0.770703	0.586132	0.201021	-3.83394	0.000126105	0.00455741		852.147	-0.68315	0.622804	0.224929	-3.03718	0.00238802	0.110064		852.147	-0.183304	0.880684	0.204914	-0.894541	0.371033	0.973655		852.147	0.560721	1.47501	0.203575	2.75437	0.00588051
R07H5.1	vang-1	1528.29	1432.67	1649.56	962.601	1020.16	1039.33	1071.49	1150.26	520.449	430.285	524.241	394.236	410.749	482.579	630.672	496.15	750.846		852.622	-0.609375	0.655481	0.159378	-3.82347	0.000131589	0.00472088		852.622	-0.468388	0.722772	0.178254	-2.62765	0.00859773	0.169966		852.622	-0.195575	0.873225	0.165147	-1.18425	0.236315	0.973655		852.622	0.348556	1.27329	0.163758	2.12848	0.0332975
B0207.6	dac-1	815.87	822.289	978.771	614.447	558.86	561.751	589.626	644.016	186.016	151.435	198.263	150.095	171.071	190.274	276.228	209.565	255.703		433.781	-0.593049	0.66294	0.155275	-3.81934	0.000133811	0.00476582		433.781	-0.50039	0.706915	0.17388	-2.87778	0.0040048	0.131494		433.781	-0.0644238	0.956327	0.173376	-0.371585	0.710202	0.974801		433.781	0.469836	1.38495	0.170081	2.76242	0.0057374
C02B10.2	daf-7	1713.86	1390.08	1708.36	937.944	940.623	930.457	970.85	1083.57	367.085	359.267	408.689	322.038	310.067	432.023	464.341	395.845	721.029		791.537	-0.776648	0.583721	0.203444	-3.8175	0.00013481	0.00476685		791.537	-0.643112	0.64033	0.227554	-2.8262	0.00471037	0.140289		791.537	-0.0924914	0.937902	0.209762	-0.440935	0.65926	0.974801		791.537	0.479147	1.39392	0.208384	2.29934	0.0214854
F45E4.9	rnt-1	2014.61	1646.61	2143.93	1044.46	1039.25	1304.65	1220.93	1285.85	940.965	793.73	958.474	731.474	760.02	744.551	1156.4	875.875	1667.04		1195.81	-0.776502	0.583781	0.203758	-3.81091	0.000138457	0.00484363		1195.81	-0.626571	0.647714	0.227866	-2.74974	0.00596428	0.151962		1195.81	-0.268174	0.83037	0.205516	-1.30488	0.191933	0.973655		1195.81	0.458151	1.37378	0.204703	2.23812	0.0252131
F35G12.2	cpb-3	4604.07	4732.98	5070.27	3446.03	3822.94	3207.65	3887.46	3994.21	1432.72	1360.83	1432.85	1238.76	1177.01	1280.44	1095.01	1098.87	1371.58		2603.16	-0.459826	0.727074	0.120688	-3.81003	0.000138953	0.00484363		2603.16	-0.285312	0.820564	0.13492	-2.11467	0.0344577	0.252639		2603.16	-0.193372	0.874559	0.123583	-1.56471	0.11765	0.973655		2603.16	-0.245047	0.843788	0.123682	-1.98127	0.0475607
F59G1.7	mtk-1	379.673	402.526	483.405	270.238	225.877	285.45	263.298	297.406	217.678	230.808	295.57	270.74	281.555	293.224	290.089	301.81	403.885		305.484	-0.694523	0.617914	0.182498	-3.80565	0.000141433	0.00489538		305.484	-0.590417	0.664151	0.204562	-2.88625	0.00389857	0.129482		305.484	0.187537	1.13882	0.185179	1.01273	0.311188	0.973655		305.484	0.424067	1.3417	0.184306	2.30088	0.0213982
R11A8.2	vps-51	1835.44	1447.88	1916.68	970.491	1107.11	1006.39	1255.5	1263.98	1315.97	885.635	1154.3	916.717	956.039	932.068	1553.41	1024.54	1739.33		1251.85	-0.753813	0.593034	0.198427	-3.79893	0.000145319	0.00499472		1251.85	-0.460418	0.726776	0.221705	-2.07672	0.0378277	0.260636		1251.85	-0.258833	0.835763	0.199126	-1.29985	0.193653	0.973655		1251.85	0.363248	1.28632	0.198536	1.82963	0.0673051
F39H11.1	tmc-2	2872.08	2180.94	3022.03	1435.02	1493.12	1616.64	1605.21	1733.05	1157.65	807.307	1009.56	769.472	809.916	832.794	1323.72	977.971	1948.04		1505.56	-0.829199	0.562842	0.218851	-3.78888	0.000151331	0.00516521		1505.56	-0.689443	0.620093	0.244737	-2.81708	0.00484631	0.141516		1505.56	-0.302377	0.810915	0.220751	-1.36976	0.170761	0.973655		1505.56	0.514662	1.42866	0.219983	2.33955	0.0193068
C14A4.10	B0416.3	1440.84	1312.01	1461.18	826.495	872.754	951.5	861.057	922.835	866.756	774.931	994.964	682.075	752.892	910.007	1115.8	919.758	1448.38		1006.72	-0.668636	0.629101	0.176973	-3.77818	0.000157979	0.00531828		1006.72	-0.655293	0.634946	0.198204	-3.30615	0.000945879	0.0983518		1006.72	-0.168498	0.889769	0.178072	-0.946232	0.34403	0.973655		1006.72	0.402607	1.32189	0.177337	2.27029	0.0231902
C42C1.15	B0416.7	550.312	479.584	578.093	370.838	346.769	324.791	405.622	411.121	327.507	267.362	284.623	219.442	254.825	253.699	330.682	300.914	438.22		361.435	-0.625662	0.648122	0.165578	-3.77866	0.000157674	0.00531828		361.435	-0.392385	0.761869	0.184832	-2.12292	0.0337602	0.250602		361.435	-0.273287	0.827432	0.17119	-1.59639	0.110401	0.973655		361.435	0.282063	1.21593	0.168774	1.67125	0.094672
T06A10.4	B0432.10	2846.48	2384.74	3101.77	1521.82	1762.48	1476.65	1951.86	2027.17	1161.61	957.697	1151.87	850.219	901.688	1003.77	1543.51	1082.75	2238.99		1645	-0.807709	0.571288	0.213889	-3.7763	0.000159178	0.00532217		1645	-0.48147	0.716247	0.239027	-2.01429	0.0439793	0.276509		1645	-0.247299	0.842472	0.215511	-1.1475	0.251175	0.973655		1645	0.572797	1.4874	0.21482	2.6664	0.00766687
F45G2.10	trul-1	635.632	577.934	829.264	371.824	392.368	460.197	446.286	401.28	783.642	589.031	649.524	515.831	514.105	631.49	835.615	657.354	981.251		604.272	-0.738192	0.59949	0.195649	-3.77304	0.00016127	0.0053557		604.272	-0.684151	0.622372	0.219273	-3.12009	0.00180797	0.104274		604.272	-0.283898	0.821369	0.194482	-1.45976	0.144356	0.973655		604.272	0.290591	1.22314	0.193528	1.50155	0.133214
F32B6.3	mrpl-41	1307.52	1029.13	1358.52	738.717	761.406	798.711	885.455	812.401	575.858	413.575	533.972	404.685	457.081	432.023	729.678	524.809	814.095		739.861	-0.684624	0.622168	0.182048	-3.76068	0.000169453	0.00558967		739.861	-0.536824	0.689287	0.203614	-2.63648	0.00837703	0.169236		739.861	-0.235485	0.8494	0.186089	-1.26544	0.205714	0.973655		739.861	0.441193	1.35773	0.184621	2.38973	0.0168609
C34B2.2	misc-1	3360.53	2660.52	3639	1621.43	1635.22	1915.81	1846.14	1952.82	1087.4	752.999	968.204	644.077	722.598	847.501	1325.7	881.249	1954.37		1636.21	-0.901101	0.535478	0.239825	-3.75733	0.000171737	0.00558997		1636.21	-0.761482	0.58989	0.268181	-2.83943	0.00451944	0.137026		1636.21	-0.34307	0.788362	0.242003	-1.41763	0.156299	0.973655		1636.21	0.567156	1.4816	0.241175	2.35163	0.0186912
Y54E10BR.4	cat-2	1758.65	1623.28	2054.22	1324.56	1257.7	1301.91	1290.06	1414.87	845.978	763.443	803.999	702.975	748.437	764.773	915.81	787.213	983.961		1137.76	-0.484991	0.714502	0.129073	-3.75749	0.000171626	0.00558997		1137.76	-0.422277	0.746246	0.14449	-2.92253	0.00347199	0.129482		1137.76	-0.123044	0.918248	0.132423	-0.929177	0.352797	0.973655		1137.76	0.154643	1.11315	0.131878	1.17262	0.240948
F01F1.4	B0432.7	632.432	592.129	709.659	382.673	408.275	401.643	469.668	473.445	595.647	590.075	615.467	501.582	518.56	606.671	734.628	591.081	1047.21		580.638	-0.697795	0.616514	0.186138	-3.7488	0.000177681	0.00560367		580.638	-0.45139	0.731338	0.207866	-2.17154	0.0298905	0.242569		580.638	-0.14671	0.903308	0.185067	-0.792739	0.42793	0.973655		580.638	0.39797	1.31765	0.184087	2.16186	0.0306291
F30A10.9	B0454.5	965.179	913.541	1031.6	629.241	607.64	727.349	606.908	686.659	1062.67	807.307	889.142	857.819	800.115	908.168	1205.9	980.658	1253.22		878.418	-0.56667	0.675173	0.151099	-3.75031	0.000176613	0.00560367		878.418	-0.585215	0.66655	0.169548	-3.45162	0.000557224	0.0844728		878.418	-0.10515	0.929708	0.150383	-0.699218	0.484416	0.973655		878.418	0.317504	1.24617	0.149771	2.11993	0.034012
F58B3.7	lat-1	1128.35	969.307	1236.92	636.145	721.109	673.369	799.045	821.148	1369.4	953.52	1196.88	942.366	976.532	1072.7	1648.46	1071.11	1725.77		1055.42	-0.715741	0.608892	0.191003	-3.74727	0.000178769	0.00560367		1055.42	-0.456431	0.728787	0.213385	-2.139	0.0324355	0.247192		1055.42	-0.234641	0.849896	0.190028	-1.23477	0.216916	0.973655		1055.42	0.336563	1.26274	0.189489	1.77616	0.0757059
F59E10.2	B0457.2	2649.18	2431.38	2746.94	1755.56	1827.16	1675.19	1843.09	2044.67	1494.07	1283.54	1408.52	1125.71	1109.29	1228.97	1674.2	1283.36	1986.9		1739.28	-0.574163	0.671676	0.153003	-3.75263	0.000174986	0.00560367		1739.28	-0.424738	0.744974	0.171086	-2.4826	0.0130429	0.186983		1739.28	-0.273245	0.827456	0.154394	-1.76979	0.0767626	0.973655		1739.28	0.240097	1.18107	0.15387	1.56038	0.11867
F53F4.3	B0457.6	1816.24	1493.5	1930.63	1054.32	1111.36	1076.84	1141.64	1288.03	650.067	720.623	701.827	600.378	513.214	651.712	703.936	677.057	1097.81		1013.48	-0.692594	0.61874	0.184515	-3.75358	0.000174325	0.00560367		1013.48	-0.524056	0.695414	0.206319	-2.54003	0.0110842	0.183662		1013.48	-0.231439	0.851785	0.187556	-1.23397	0.217214	0.973655		1013.48	0.258688	1.19639	0.186743	1.38526	0.165972
R04F11.3	ctr-9	3985.5	3278	3776.54	2226.01	2373.3	2405.28	2603.5	2707.27	232.52	202.61	229.888	148.195	188	146.153	316.821	184.489	284.617		1487.57	-0.656341	0.634486	0.175167	-3.74695	0.000178998	0.00560367		1487.57	-0.470783	0.721573	0.195838	-2.40394	0.0162195	0.203503		1487.57	-0.46225	0.725853	0.19378	-2.38544	0.0170586	0.973655		1487.57	0.239807	1.18084	0.189861	1.26307	0.206565
H35B03.2	nlp-36	1407.78	1311	1561.85	918.218	966.074	894.776	1099.96	1185.25	75.198	53.2634	57.1678	58.8979	50.7868	53.3135	92.0761	52.8391	61.4411		582.346	-0.623403	0.649138	0.16672	-3.73922	0.000184595	0.0056804		582.346	-0.320661	0.800703	0.186163	-1.72248	0.0849835	0.357653		582.346	-0.193953	0.874207	0.224431	-0.864198	0.387479	0.973655		582.346	0.140797	1.10251	0.219153	0.642458	0.520576
T21D12.3	bre-3	2586.25	2258	3025.02	1638.2	1813.38	1684.34	1935.6	2110.27	93.0081	56.3966	69.3312	67.4476	59.6968	74.4551	89.1059	77.0197	72.2837		1041.75	-0.615721	0.652603	0.164656	-3.73945	0.000184425	0.0056804		1041.75	-0.374909	0.771154	0.184022	-2.0373	0.0416199	0.271062		1041.75	-0.123091	0.918218	0.214899	-0.572784	0.566791	0.973655		1041.75	0.117491	1.08485	0.211667	0.555078	0.578842
M01D7.7	spk-1	3087.51	3417.92	2704.08	4053.57	4608.74	3947.81	5012.84	4714.77	17820.9	18876.1	20010	18950.9	18620	21060.7	18746.9	19377.6	20197.9		12071.1	0.453296	1.36916	0.121242	3.73878	0.000184916	0.0056804		12071.1	0.663991	1.58446	0.13542	4.9032	9.42868e-07	0.00671794		12071.1	0.0481817	1.03396	0.119905	0.401833	0.687807	0.974801		12071.1	0.040561	1.02851	0.119907	0.33827	0.73516
C18A3.3	B0464.6	1967.69	1607.06	2404.07	1275.25	1412.53	1286.35	1554.38	1608.4	347.296	326.891	311.382	363.837	294.029	360.326	406.917	340.32	375.875		955.447	-0.589419	0.664611	0.157887	-3.73317	0.000189084	0.00577235		955.447	-0.333796	0.793446	0.176406	-1.89221	0.0584637	0.311558		955.447	0.0457014	1.03218	0.167985	0.272056	0.785579	0.982663		955.447	0.187084	1.13846	0.167514	1.11682	0.26407
ZK688.7	baf-1	855.33	666.145	896.044	533.573	490.99	476.665	550.995	599.187	2.96834	0	0	0.949966	0.890996	3.6768	1.98013	3.58231	0.903546		299.052	-0.687431	0.620959	0.184395	-3.72803	0.000192985	0.00585506		299.052	-0.486834	0.713589	0.206107	-2.36205	0.0181742	0.206017		299.052	0.776855	1.71339	1.03623	0.749692	0.45344	0.973655		299.052	1.012	2.01671	1.01208	0.999919	0.31735
C29E4.12	tag-342	1316.06	1139.65	1344.56	679.541	693.537	819.754	771.597	745.703	371.043	274.672	341.791	246.991	277.991	365.841	422.758	350.171	633.385		635.002	-0.793046	0.577124	0.213252	-3.71882	0.000200153	0.0059985		635.002	-0.739583	0.598913	0.238707	-3.09828	0.00194645	0.104274		635.002	-0.148516	0.902178	0.22002	-0.675012	0.499668	0.973655		635.002	0.510232	1.42428	0.218255	2.33778	0.0193986
D2030.3	B0464.9	1512.29	1380.96	1743.25	1095.75	1170.74	1029.27	1119.27	1283.66	690.634	589.031	606.952	577.579	576.475	612.186	703.936	601.828	656.878		938.276	-0.492831	0.710629	0.132512	-3.71913	0.000199906	0.0059985		938.276	-0.363608	0.777218	0.148219	-2.45318	0.0141598	0.193124		938.276	-0.0957621	0.935778	0.136943	-0.699287	0.484373	0.973655		938.276	0.0559563	1.03955	0.136584	0.409685	0.682037
F56A6.2	jnk-1	321.015	326.482	330.908	502.012	548.255	432.75	482.883	457.044	825.199	774.931	768.725	734.323	858.03	783.157	933.632	864.233	637.903		622.44	0.599039	1.51471	0.161386	3.71185	0.000205753	0.00612894		622.44	0.527172	1.4411	0.180595	2.91909	0.00351057	0.129482		622.44	0.00396504	1.00275	0.155676	0.0254698	0.97968	1		622.44	0.0395189	1.02777	0.155639	0.253913	0.799563
F32A7.4	B0478.3	904.389	813.163	940.896	658.829	660.663	581.879	743.132	768.665	82.1241	87.728	83.9273	75.0473	76.6257	89.1623	84.1555	81.4976	86.7404		401.096	-0.484091	0.714947	0.13067	-3.70468	0.000211655	0.00626676		401.096	-0.229458	0.852955	0.145754	-1.57428	0.115422	0.410986		401.096	-0.0752494	0.949178	0.178851	-0.420739	0.673946	0.974801		401.096	-0.00787312	0.994558	0.178043	-0.0442203	0.964729
C08H9.16	sqt-1	1080.36	808.094	1222.97	563.161	648.998	626.709	773.63	785.066	381.927	315.403	390.444	312.539	310.067	266.568	491.072	337.633	600.858		583.264	-0.758839	0.590972	0.205224	-3.69761	0.000217636	0.00640528		583.264	-0.412303	0.751423	0.2291	-1.79966	0.0719139	0.336317		583.264	-0.290441	0.817652	0.211043	-1.37622	0.168754	0.973655		583.264	0.394454	1.31444	0.209139	1.88608	0.0592841
Y97E10AL.2	lgc-20	3557.83	3169.51	3901.13	2254.62	2239.68	2051.21	2424.58	2550.92	734.17	715.401	794.268	638.377	692.304	814.41	855.416	762.137	1348.09		1735.53	-0.699418	0.61582	0.189297	-3.69482	0.000220038	0.00643743		1735.53	-0.510089	0.702179	0.211637	-2.4102	0.0159436	0.203019		1735.53	-0.0645923	0.956216	0.192914	-0.334824	0.737758	0.975883		1735.53	0.402834	1.3221	0.19229	2.09493	0.0361775
M03E7.5	nduf-11	871.328	748.272	1063.49	423.11	451.754	513.261	579.46	539.049	292.876	265.273	317.464	170.994	249.479	239.911	365.334	264.195	635.193		470.026	-0.950606	0.517415	0.257656	-3.68944	0.000224745	0.00653623		470.026	-0.677335	0.625319	0.287919	-2.35252	0.0186468	0.206379		470.026	-0.406041	0.754692	0.263788	-1.53927	0.123739	0.973655		470.026	0.531144	1.44508	0.261181	2.03363	0.0419891
K11D12.12	clh-2	394.604	317.357	424.599	243.609	235.421	250.684	227.718	270.071	91.0292	107.571	98.5233	75.0473	102.465	96.5159	110.887	100.305	126.496		192.524	-0.638862	0.642219	0.173294	-3.68658	0.000227284	0.00657118		192.524	-0.606942	0.656587	0.194846	-3.11498	0.00183957	0.104274		192.524	-0.114461	0.923727	0.19972	-0.573108	0.566572	0.973655		192.524	0.18532	1.13707	0.196561	0.942815	0.345776
C31E10.7	sre-1	2303.63	2346.21	2365.2	1772.33	1541.9	1894.77	1726.18	1758.2	1360.49	1421.4	1424.33	1316.65	1331.15	1574.59	1497.97	1542.19	1654.39		1695.97	-0.42905	0.742751	0.116507	-3.68263	0.000230843	0.00663504		1695.97	-0.424638	0.745026	0.130493	-3.2541	0.00113752	0.0983518		1695.97	0.00569788	1.00396	0.117748	0.0483906	0.961405	0.99925		1695.97	0.15872	1.1163	0.117572	1.34998	0.177022
T12A2.7	cpna-5	1884.5	1606.05	1991.43	1168.73	1155.9	1241.52	1190.43	1237.74	1002.31	779.108	834.407	710.574	852.684	728.925	1228.67	803.333	1078.83		1146.77	-0.620225	0.650569	0.168498	-3.6809	0.000232412	0.00664131		1146.77	-0.589906	0.664386	0.188617	-3.12753	0.0017628	0.104274		1146.77	-0.190792	0.876125	0.170654	-1.118	0.263565	0.973655		1146.77	0.249227	1.18857	0.170029	1.4658	0.142704
C45G9.2	B0495.5	953.448	841.553	1148.21	612.474	617.185	566.326	618.091	719.461	66.293	57.441	55.9515	59.8478	46.3318	63.4247	72.2748	59.1081	107.522		392.056	-0.712879	0.610101	0.193865	-3.6772	0.000235813	0.00669953		392.056	-0.553145	0.681533	0.216818	-2.5512	0.0107353	0.182712		392.056	-0.0878301	0.940937	0.243916	-0.360083	0.718785	0.974801		392.056	0.408775	1.32756	0.237246	1.723	0.0848879
F54F2.9	moa-2	1045.17	903.402	1085.42	673.623	742.318	686.178	815.31	852.857	1867.09	1461.09	1578.81	1429.7	1522.71	1374.2	1950.43	1517.11	1854.08		1256.44	-0.529621	0.692737	0.144112	-3.67505	0.000237803	0.00671725		1256.44	-0.278073	0.824692	0.16087	-1.72855	0.083889	0.357002		1256.44	-0.181836	0.88158	0.141384	-1.28612	0.198402	0.973655		1256.44	0.116562	1.08415	0.141104	0.826068	0.408766
Y71F9B.8	B0495.7	1595.48	1809.85	1166.15	2593.89	2626.75	2196.68	2315.81	2513.74	2211.42	2020.88	2335.37	2616.21	1991.38	2125.19	2586.05	1792.95	1913.71		2141.85	0.698222	1.6225	0.190067	3.67355	0.000239199	0.00671808		2141.85	0.664232	1.58472	0.212482	3.12607	0.00177161	0.104274		2141.85	0.0358445	1.02516	0.189761	0.188893	0.850177	0.991268		2141.85	-0.0617947	0.958072	0.189822	-0.325541	0.744772
F20B6.3	luc-7L	168.506	204.812	155.487	274.183	284.202	255.258	232.801	202.28	456.135	478.327	512.078	546.23	573.802	521.186	458.4	537.347	380.393		367.143	0.620925	1.53786	0.169283	3.66798	0.000244478	0.00682734		367.143	0.304338	1.23485	0.191567	1.58867	0.112135	0.404537		367.143	0.182977	1.13522	0.157545	1.16143	0.245468	0.973655		367.143	-0.0711505	0.951879	0.158302	-0.449461	0.653099
C29E4.13	unc-82	794.54	705.688	879.1	481.3	527.046	497.708	564.211	598.093	290.898	202.61	231.104	283.09	258.389	237.153	294.049	233.746	366.84		437.974	-0.66	0.632878	0.180274	-3.6611	0.000251138	0.0069737		437.974	-0.448768	0.732668	0.201453	-2.22766	0.0259031	0.229761		437.974	0.1021	1.07333	0.189213	0.539604	0.58947	0.973655		437.974	0.302635	1.2334	0.188427	1.60612	0.108248
F53B7.3	srtx-1	2415.61	2075.49	2801.76	1330.48	1426.31	1532.46	1567.59	1642.3	846.967	648.561	788.186	608.928	698.541	669.177	1153.43	726.314	1439.35		1315.97	-0.765721	0.588159	0.209578	-3.65364	0.000258548	0.00709923		1315.97	-0.599044	0.660191	0.234341	-2.55629	0.0105793	0.182712		1315.97	-0.20824	0.865592	0.212384	-0.980491	0.326844	0.973655		1315.97	0.539314	1.45328	0.211474	2.55027	0.010764
K08H10.9	B0496.6	883.059	784.774	1039.57	585.845	513.26	718.2	585.559	612.307	202.837	205.743	184.883	175.744	200.474	194.87	238.606	236.433	252.993		447.95	-0.574142	0.671685	0.157107	-3.65447	0.000257714	0.00709923		447.95	-0.591707	0.663557	0.176288	-3.35649	0.0007894	0.0956441		447.95	-0.0563673	0.961683	0.17293	-0.325954	0.744459	0.975947		447.95	0.293582	1.22568	0.170909	1.71777	0.0858391
C13F10.7	tes-1	3951.37	3189.79	4287.85	2128.37	2166.51	2365.03	2345.29	2683.22	672.824	524.279	638.577	465.483	536.38	577.257	840.565	583.917	1176.42		1713.71	-0.779085	0.582736	0.21353	-3.6486	0.000263669	0.00719964		1713.71	-0.599582	0.659945	0.238743	-2.51142	0.0120248	0.185416		1713.71	-0.21704	0.860329	0.218037	-0.995429	0.319528	0.973655		1713.71	0.50274	1.4169	0.21696	2.31721	0.0204925
Y39G10AL.3	B0507.1	2931.8	2732.51	3312.07	1943.94	2081.67	1905.74	2054.54	2250.23	84.103	101.305	82.7109	70.2975	69.4977	75.3743	76.235	82.3932	129.207		1175.51	-0.597878	0.660725	0.164075	-3.64394	0.000268499	0.00729102		1175.51	-0.47532	0.719307	0.183489	-2.59045	0.00958501	0.177385		1175.51	-0.319014	0.801618	0.208829	-1.52763	0.126604	0.973655		1175.51	0.103677	1.07451	0.203511	0.509441	0.610443
PAR2.1	B0507.2	1797.05	1647.62	1856.87	1131.25	1031.82	1332.1	1183.32	1190.72	1297.17	1133.15	1246.75	1083.91	1152.06	1285.96	1450.45	1345.16	2017.62		1363.7	-0.600657	0.659454	0.165318	-3.63334	0.000279775	0.00754165		1363.7	-0.574113	0.671699	0.185074	-3.10208	0.00192166	0.104274		1363.7	-0.0621566	0.957831	0.165821	-0.374842	0.707778	0.974801		1363.7	0.38855	1.30908	0.165393	2.34926	0.018811
T07A9.8	fkb-7	1565.62	1364.74	1865.84	959.642	1038.18	998.16	1124.36	1132.77	163.259	128.459	158.124	122.546	125.63	160.86	141.579	120.007	201.491		668.898	-0.678964	0.624614	0.186919	-3.6324	0.000280798	0.00754165		668.898	-0.502497	0.705884	0.208992	-2.40439	0.0161996	0.203503		668.898	-0.136668	0.909618	0.208551	-0.655319	0.512262	0.973655		668.898	0.0428056	1.03012	0.207337	0.206455	0.836436
C01G10.12	B0511.11	132.246	128.768	136.55	65.0939	78.4736	95.15	97.5932	92.9395	194.921	169.19	171.504	156.744	181.763	185.678	239.596	194.34	277.389		152.82	-0.733047	0.601632	0.202073	-3.62764	0.000286023	0.00764022		152.82	-0.4758	0.719068	0.224706	-2.11744	0.0342228	0.252156		152.82	-0.0318884	0.978139	0.186379	-0.171094	0.86415	0.992369		152.82	0.407858	1.32671	0.183862	2.21828	0.026536
T10C6.5	B0511.12	5625.77	4552.5	5579.59	3189.6	3106.07	3159.16	3418.81	3832.39	2268.8	1737.85	2157.78	1592.14	1805.16	1981.79	2869.21	1982.81	3820.19		3098.8	-0.736933	0.600014	0.203287	-3.62509	0.00028886	0.00765307		3098.8	-0.534838	0.690236	0.227276	-2.35326	0.0186098	0.206379		3098.8	-0.196551	0.872634	0.204192	-0.962577	0.33576	0.973655		3098.8	0.492443	1.40682	0.203867	2.41551	0.015713
F39C12.3	cutl-14	847.865	945.987	719.626	1297.93	1282.09	1177.48	1276.85	1209.31	1406	1744.12	1638.41	1972.13	1837.23	1713.39	1473.22	1574.43	1112.26		1366.37	0.580057	1.49491	0.160042	3.62441	0.000289618	0.00765307		1366.37	0.569353	1.48386	0.178896	3.18258	0.00145967	0.0983518		1366.37	0.205957	1.15345	0.158223	1.30168	0.193025	0.973655		1366.37	-0.202928	0.868785	0.158597	-1.27952	0.200714
C29A12.1	B0511.6	981.177	812.149	1169.14	527.655	499.474	455.622	581.493	626.522	297.824	257.962	357.603	197.593	245.915	239.911	412.857	280.316	777.049		512.957	-0.998668	0.500462	0.275708	-3.6222	0.000292112	0.00767772		512.957	-0.709293	0.61162	0.308097	-2.30217	0.0213255	0.213521		512.957	-0.417363	0.748792	0.281388	-1.48323	0.138013	0.973655		512.957	0.687778	1.6108	0.278735	2.4675	0.0136062
Y53C12B.2	B0511.7	3644.22	3384.46	3830.36	2387.76	2496.31	2669.69	2647.22	2794.75	1691.96	1433.94	1562.99	1405.95	1235.81	1624.22	1586.08	1411.43	1895.64		2217.81	-0.523573	0.695647	0.144662	-3.61928	0.000295419	0.00772331		2217.81	-0.411778	0.751696	0.161782	-2.54527	0.0109193	0.183491		2217.81	-0.13653	0.909705	0.146247	-0.933557	0.350533	0.973655		2217.81	0.0614546	1.04352	0.146064	0.420737	0.673947
C50D2.5	mrps-30	2841.15	2365.47	2984.16	1515.9	1465.55	1729.17	1767.86	1834.74	1030.01	827.15	1025.37	745.723	840.21	1104.88	1335.6	913.489	1813.42		1537.64	-0.797977	0.575155	0.220866	-3.61295	0.000302731	0.00787261		1537.64	-0.600014	0.659748	0.246934	-2.42986	0.0151046	0.200411		1537.64	-0.0991421	0.933588	0.222662	-0.445257	0.656134	0.973949		1537.64	0.495121	1.40944	0.222133	2.22894	0.0258181
F25B4.7	thoc-7	858.53	693.521	1034.59	495.108	499.474	564.496	538.796	545.61	225.594	212.009	183.667	170.044	190.673	233.476	239.596	198.818	330.698		424.394	-0.730175	0.602831	0.202306	-3.60926	0.000307071	0.00794344		424.394	-0.669302	0.628811	0.226564	-2.95414	0.00313542	0.122747		424.394	-0.0657342	0.955459	0.213607	-0.307735	0.758284	0.979046		424.394	0.30651	1.23671	0.211945	1.44617	0.148128
F27D4.4	B0513.4	3429.85	2748.74	3155.59	1968.6	2168.63	2106.11	2181.62	2428.46	1426.78	1229.24	1339.19	1255.85	1297.29	1151.76	1827.66	1304.86	2018.52		1943.45	-0.580191	0.668875	0.161274	-3.59755	0.000321227	0.00816475		1943.45	-0.432798	0.740824	0.180331	-2.40001	0.0163945	0.203503		1943.45	-0.108873	0.927312	0.162888	-0.66839	0.503885	0.973655		1943.45	0.366426	1.28916	0.162454	2.25556	0.024098
Y37E3.3	prdh-1	2915.8	2896.77	3075.85	1971.56	1811.26	1935.02	1831.91	2144.17	3297.83	3263.69	3745.1	3230.83	3138.98	4213.61	4357.28	3519.62	5711.31		3121.21	-0.636416	0.643309	0.176968	-3.59622	0.000322875	0.00816475		3121.21	-0.575727	0.670948	0.197965	-2.90822	0.00363492	0.129482		3121.21	0.0383416	1.02693	0.176403	0.217353	0.827933	0.990964		3121.21	0.398901	1.3185	0.176294	2.26271	0.0236535
W04C9.4	vamp-8	1062.23	878.054	996.712	537.518	639.454	771.264	751.265	724.928	592.679	523.235	609.385	525.331	554.2	529.459	740.569	610.784	850.236		699.841	-0.591521	0.663643	0.164574	-3.59425	0.000325329	0.00816475		699.841	-0.407324	0.754021	0.183967	-2.21411	0.0268211	0.231918		699.841	-0.100269	0.932859	0.166734	-0.601371	0.547593	0.973655		699.841	0.35198	1.27631	0.165798	2.12294	0.0337587
W05B10.2	fli-1	926.785	785.787	1009.67	479.328	478.265	492.218	588.609	609.027	366.096	295.56	361.252	250.791	316.304	337.346	416.817	298.227	748.136		515.307	-0.908895	0.532593	0.252618	-3.5979	0.000320792	0.00816475		515.307	-0.599686	0.659897	0.282199	-2.12505	0.0335823	0.250221		515.307	-0.177177	0.884432	0.256778	-0.690001	0.490193	0.973655		515.307	0.516814	1.43079	0.255226	2.02492	0.0428752
F35G12.1	B0524.6	602.571	471.472	644.873	349.14	387.066	337.6	406.639	419.868	136.544	111.749	135.013	122.546	105.138	110.304	143.559	116.425	196.069		282.151	-0.679265	0.624483	0.188944	-3.59507	0.00032431	0.00816475		282.151	-0.471503	0.721213	0.211137	-2.23316	0.0255386	0.229751		282.151	-0.181483	0.881796	0.209964	-0.864352	0.387395	0.973655		282.151	0.251681	1.19059	0.206538	1.21857	0.223007
F49B2.5	tpa-1	201.568	220.02	198.346	336.318	292.685	246.109	284.647	264.604	2294.53	2377.01	2225.9	2521.21	2439.55	2461.61	2364.28	2221.93	2314.88		1368.54	0.495778	1.41008	0.137945	3.59404	0.000325593	0.00816475		1368.54	0.410771	1.3294	0.154871	2.65235	0.00799335	0.167016		1368.54	0.105689	1.07601	0.11757	0.898942	0.368684	0.973655		1368.54	0.000595703	1.00041	0.117666	0.00506268	0.995961
F59E10.3	scl-23	5771.88	5610.02	6251.38	4316.91	3735.98	4363.18	4089.77	4277.4	2193.61	2272.57	2416.86	2280.87	2029.69	2837.57	2551.4	2506.72	2978.09		3557.88	-0.506014	0.704165	0.141312	-3.58084	0.000342488	0.00854482		3557.88	-0.490558	0.71175	0.158071	-3.1034	0.00191313	0.104274		3557.88	0.0546446	1.0386	0.1424	0.383739	0.701172	0.974801		3557.88	0.223679	1.16771	0.142305	1.57183	0.115991
C47E12.2	mai-2	1496.29	1440.78	1774.15	1032.63	997.888	1019.2	1060.31	1105.43	509.565	585.898	542.486	448.384	481.138	506.479	597.999	549.885	912.581		885.947	-0.627459	0.647316	0.175649	-3.57223	0.000353961	0.0087384		885.947	-0.536389	0.689494	0.196531	-2.72929	0.00634717	0.153252		885.947	-0.189647	0.87682	0.180098	-1.05302	0.292331	0.973655		885.947	0.331472	1.2583	0.178999	1.85181	0.0640536
R144.9	otub-4	1006.77	890.221	1247.88	647.98	603.399	814.265	687.219	675.725	407.652	365.533	377.065	340.088	340.361	353.892	485.132	401.219	549.356		599.633	-0.605793	0.65711	0.169668	-3.57047	0.000356343	0.0087384		599.633	-0.621402	0.650039	0.190217	-3.2668	0.00108771	0.0983518		599.633	-0.15359	0.899011	0.175851	-0.873408	0.382441	0.973655		599.633	0.319342	1.24776	0.174413	1.83095	0.0671085
Y54E10BR.8	B0546.3	955.581	771.593	1004.69	569.078	609.761	530.644	675.02	730.395	247.362	225.586	267.594	226.092	199.583	212.335	258.407	225.686	393.042		476.614	-0.676632	0.625624	0.189448	-3.57159	0.000354815	0.0087384		476.614	-0.374027	0.771626	0.21149	-1.76854	0.0769712	0.346881		476.614	-0.214336	0.861943	0.199881	-1.07232	0.283577	0.973655		476.614	0.245661	1.18564	0.197877	1.24148	0.214429
K04G7.1	B0546.4	3213.35	2808.56	3596.14	1956.76	2277.86	1989	2520.14	2627.45	73.2191	42.8196	63.2495	53.1981	49.8958	48.7175	85.1456	51.0479	64.1517		1265.92	-0.62811	0.647024	0.175955	-3.56972	0.000357359	0.0087384		1265.92	-0.316916	0.802784	0.196618	-1.61184	0.106997	0.394798		1265.92	-0.241151	0.84607	0.235688	-1.02318	0.306223	0.973655		1265.92	0.154401	1.11296	0.229391	0.67309	0.50089
C03C10.4	csn-5	1885.57	1564.48	1935.61	1071.09	1076.36	1144.54	1179.25	1226.8	1500.99	999.473	1375.68	936.666	1163.64	1177.49	1943.5	1257.39	2046.53		1381.47	-0.710079	0.611287	0.1993	-3.56287	0.000366816	0.00888702		1381.47	-0.577511	0.670119	0.222899	-2.59091	0.00957222	0.177385		1381.47	-0.241769	0.845707	0.199664	-1.21088	0.225941	0.973655		1381.47	0.436901	1.35369	0.199124	2.19412	0.0282271
Y54F10AM.5	B0563.10	2727.03	2631.12	2739.96	1890.68	1741.27	1978.94	1780.06	1959.38	1796.84	1738.89	1914.51	1638.69	1629.63	2180.34	1875.18	1906.69	2426.02		2032.66	-0.529205	0.692936	0.14854	-3.56271	0.000367053	0.00888702		2032.66	-0.529885	0.69261	0.166265	-3.187	0.00143758	0.0983518		2032.66	-0.000255165	0.999823	0.148995	-0.00171257	0.998634	1		2032.66	0.188053	1.13923	0.148862	1.26327	0.206491
T04A8.6	tsp-11	2395.35	2170.8	2403.07	1590.86	1668.09	1572.72	1680.43	1901.43	1093.34	963.964	1037.54	944.266	920.399	1137.05	1315.8	922.445	1217.98		1466.8	-0.528544	0.693254	0.148432	-3.56084	0.000369675	0.00890663		1466.8	-0.37543	0.770876	0.165967	-2.26207	0.023693	0.223593		1466.8	-0.0441598	0.969855	0.150555	-0.293313	0.769283	0.979046		1466.8	0.158907	1.11644	0.150296	1.05729	0.290377
C33H5.6	tmbi-4	1375.78	1149.78	1655.54	850.166	715.807	844.456	880.372	957.824	661.94	497.125	633.712	455.984	547.072	628.732	840.565	593.768	1140.27		848.759	-0.794438	0.576568	0.22353	-3.55406	0.000379329	0.00897083		848.759	-0.600738	0.659416	0.249917	-2.40375	0.0162278	0.203503		848.759	-0.135524	0.910339	0.225906	-0.599912	0.548565	0.973655		848.759	0.522242	1.43619	0.22497	2.32138	0.0202663
T20G5.10	B0563.5	787.074	733.064	848.202	431.987	458.116	537.049	472.717	493.126	282.982	260.051	271.243	217.542	222.749	271.164	336.622	276.734	533.092		437.266	-0.730374	0.602748	0.205514	-3.55388	0.000379587	0.00897083		437.266	-0.70916	0.611676	0.230314	-3.0791	0.00207626	0.104704		437.266	-0.19483	0.873676	0.212963	-0.91485	0.36027	0.973655		437.266	0.493772	1.40812	0.210593	2.34467	0.0190438
F09E5.17	B0563.6	1824.78	1640.52	2107.05	1048.41	1090.15	1268.06	1257.53	1220.24	250.33	208.876	259.08	178.594	155.924	221.527	303.95	257.031	448.159		808.247	-0.709812	0.6114	0.199731	-3.55385	0.00037964	0.00897083		808.247	-0.584286	0.66698	0.223388	-2.61557	0.0089079	0.171537		808.247	-0.36892	0.774362	0.213279	-1.72976	0.0836738	0.973655		808.247	0.491497	1.4059	0.209667	2.34417	0.0190693
Y66D12A.9	B0563.8	1247.8	1280.58	1475.13	919.205	951.228	867.329	916.97	990.626	26.7151	24.0208	32.8411	9.49966	18.7109	23.8992	34.6523	28.6585	36.1418		522.589	-0.548585	0.68369	0.154292	-3.55549	0.00037727	0.00897083		522.589	-0.484789	0.714601	0.172735	-2.80655	0.00500751	0.143577		522.589	-0.665354	0.630534	0.293444	-2.2674	0.0233659	0.973655		522.589	0.25916	1.19678	0.262667	0.986648	0.323815
M110.3	B0563.9	1622.14	1417.46	1782.12	1015.86	1016.98	933.202	1139.6	1137.14	750.001	795.818	895.224	754.273	776.949	903.572	913.83	779.153	1441.16		1063.2	-0.701132	0.615089	0.197485	-3.5503	0.000384793	0.00903675		1063.2	-0.497625	0.708272	0.220768	-2.25406	0.0241921	0.224731		1063.2	-0.00323436	0.997761	0.198935	-0.0162584	0.987028	1		1063.2	0.361158	1.28446	0.198509	1.81935	0.068858
T20H4.4	unc-30	4549.67	4185.46	4895.85	3118.59	3189.85	3024.67	3321.22	3588.56	744.064	613.052	699.394	635.527	591.622	633.328	865.317	548.989	727.354		2113.68	-0.546503	0.684678	0.15397	-3.5494	0.000386107	0.00903675		2113.68	-0.39526	0.760353	0.172154	-2.29596	0.021678	0.214103		2113.68	-0.144662	0.904591	0.159547	-0.906708	0.364561	0.973655		2113.68	0.0577328	1.04083	0.159153	0.36275	0.716792
F13G3.10	BE0003N10.1	1425.91	1252.19	1497.06	828.468	878.056	963.394	849.875	933.769	476.914	407.309	443.963	341.988	377.782	516.59	533.645	483.612	713.801		760.254	-0.644881	0.639545	0.182242	-3.53861	0.000402244	0.00906895		760.254	-0.642162	0.640752	0.204099	-3.14632	0.00165339	0.0998339		760.254	-0.103388	0.930844	0.187553	-0.551247	0.581464	0.973655		760.254	0.382211	1.30334	0.1864	2.05048	0.0403175
C48B6.2	BE0003N10.3	826.535	718.869	887.074	508.916	443.27	610.241	514.398	528.115	419.526	392.687	440.314	331.538	347.489	459.599	535.625	429.877	603.568		529.273	-0.637745	0.642717	0.179986	-3.5433	0.000395157	0.00906895		529.273	-0.637473	0.642838	0.201837	-3.15835	0.00158663	0.0989731		529.273	-0.137042	0.909382	0.183533	-0.746689	0.455251	0.973655		529.273	0.32536	1.25298	0.182308	1.78467	0.0743143
K07A12.7	agmo-1	1070.76	1023.04	1216.99	775.209	716.867	905.755	833.609	758.824	270.119	314.359	300.435	297.339	309.176	306.093	351.473	349.275	352.383		597.159	-0.464743	0.7246	0.131199	-3.54228	0.00039669	0.00906895		597.159	-0.470842	0.721544	0.147186	-3.19896	0.00137922	0.0983518		597.159	0.045445	1.032	0.142671	0.31853	0.750083	0.978281		597.159	0.251921	1.19079	0.141753	1.77719	0.0755375
K07A12.1	BE10.4	2256.71	1987.28	2518.69	1387.68	1661.73	1359.55	1661.12	1848.95	1243.74	1116.44	1258.91	1030.71	977.423	957.805	1395.99	1038.87	1710.41		1494.82	-0.617399	0.651845	0.174181	-3.54457	0.00039325	0.00906895		1494.82	-0.36123	0.778501	0.194649	-1.8558	0.0634815	0.322219		1494.82	-0.287069	0.819566	0.175573	-1.63503	0.102042	0.973655		1494.82	0.195899	1.14544	0.175063	1.11902	0.263132
B0228.7	C01A2.2	957.714	930.778	1058.51	686.445	673.389	757.54	666.887	825.522	518.47	458.483	484.102	454.084	478.465	537.731	540.576	497.046	580.076		653.283	-0.476627	0.718656	0.134691	-3.53867	0.000402147	0.00906895		653.283	-0.397338	0.759258	0.150849	-2.634	0.00843853	0.169843		653.283	0.00886745	1.00617	0.138892	0.0638443	0.949094	0.996321		653.283	0.14655	1.10692	0.138509	1.05806	0.290028
Y37E11AL.6	tads-1	326.348	387.317	320.941	605.57	544.013	504.112	532.696	502.967	1072.56	1431.85	1302.7	1674.79	1535.19	1324.57	1163.33	1355.9	841.201		907.414	0.676352	1.59809	0.190845	3.54399	0.000394121	0.00906895		907.414	0.58647	1.50157	0.213491	2.74705	0.00601335	0.151962		907.414	0.252426	1.19121	0.184745	1.36635	0.17183	0.973655		907.414	-0.179875	0.882779	0.18516	-0.971458	0.33132
F37D6.2	nlp-38	4896.29	4550.47	4539.03	3434.2	3502.68	3308.29	3598.75	3761.32	998.352	885.635	934.147	936.666	900.797	833.713	1107.88	807.811	1038.17		2354.95	-0.44904	0.73253	0.126892	-3.53876	0.000402006	0.00906895		2354.95	-0.341208	0.78938	0.141903	-2.40452	0.0161936	0.203503		2354.95	-0.0775018	0.947697	0.131395	-0.589838	0.555299	0.973655		2354.95	0.0671968	1.04768	0.13116	0.512327	0.608423
F26F4.10	C01B10.11	3831.92	3652.14	4550.99	2734.93	2950.18	2526.96	3205.33	3286.78	1984.83	1618.79	1918.16	1655.79	1533.4	1677.54	2092.01	1448.15	1940.82		2506.4	-0.551567	0.682279	0.155826	-3.53963	0.000400682	0.00906895		2506.4	-0.305565	0.809125	0.174165	-1.75446	0.0793518	0.350703		2506.4	-0.182175	0.881373	0.157022	-1.16019	0.245972	0.973655		2506.4	-0.0108713	0.992493	0.156893	-0.0692908	0.944758
Y87G2A.10	C01B10.3	1852.5	1770.3	2215.69	1260.45	1120.9	1368.7	1276.85	1315.37	83.1136	55.3522	79.0619	63.6477	41.8768	71.6975	80.1953	74.333	98.4865		754.619	-0.638505	0.642378	0.180706	-3.53338	0.000410279	0.00920787		754.619	-0.586529	0.665943	0.202211	-2.90058	0.00372478	0.129482		754.619	-0.296748	0.814085	0.230007	-1.29017	0.196992	0.973655		754.619	0.219722	1.16451	0.222989	0.985352	0.324451
F59E12.13	C01B10.6	1658.4	1590.84	1708.36	1232.84	1143.17	1212.25	1241.26	1406.12	128.628	121.148	117.985	115.896	123.848	138.799	137.619	131.65	177.998		728.636	-0.466236	0.723851	0.132174	-3.52744	0.000419592	0.00937406		728.636	-0.320328	0.800888	0.147796	-2.16737	0.0302068	0.243791		728.636	0.0403607	1.02837	0.166213	0.242825	0.808141	0.988		728.636	0.281653	1.21559	0.163985	1.71755	0.0858783
Y73B6BL.3	C01B10.8	1079.29	968.293	1237.92	602.612	687.175	655.986	800.061	838.643	322.56	276.761	360.036	272.64	277.1	319.881	452.46	335.842	690.309		598.68	-0.755891	0.592181	0.214952	-3.51656	0.000437171	0.00963542		598.68	-0.418685	0.748106	0.240027	-1.74432	0.0811026	0.353862		598.68	-0.140762	0.90704	0.221474	-0.635571	0.525056	0.973655		598.68	0.625124	1.54234	0.219447	2.84863	0.00439083
F59C6.4	C01B10.9	1311.79	1245.09	1510.02	829.454	792.16	888.372	851.908	900.967	671.835	522.191	614.25	480.683	532.816	638.843	796.012	605.411	1096		840.459	-0.696129	0.617226	0.197875	-3.51803	0.000434771	0.00963542		840.459	-0.629354	0.646466	0.221453	-2.84192	0.00448421	0.137026		840.459	-0.130097	0.91377	0.20054	-0.648734	0.516511	0.973655		840.459	0.465774	1.38106	0.19958	2.33377	0.0196078
F52B5.5	sup-37	1655.2	1479.31	1906.71	946.82	1038.18	982.607	1248.38	1198.37	599.605	377.022	473.155	322.038	334.124	440.296	666.314	419.13	741.811		872.299	-0.764556	0.588635	0.217364	-3.5174	0.000435805	0.00963542		872.299	-0.457941	0.728025	0.242869	-1.88555	0.0593555	0.313033		872.299	-0.403414	0.756067	0.222333	-1.81446	0.069607	0.973655		872.299	0.333128	1.25974	0.220782	1.50885	0.131336
F41E6.9	C01C10.2	820.136	714.813	1048.54	442.836	470.842	594.688	510.331	539.049	1082.46	1079.89	1215.12	870.169	989.897	1156.35	1401.93	1099.77	2026.65		944.91	-0.775957	0.584001	0.220784	-3.51455	0.000440499	0.00966541		944.91	-0.715002	0.609204	0.247217	-2.89221	0.00382543	0.129482		944.91	-0.162859	0.893253	0.21877	-0.744431	0.456616	0.973655		944.91	0.423278	1.34097	0.218295	1.93901	0.0524995
T23G7.5	acl-12	3435.19	2895.75	3613.08	1894.63	2039.25	2078.66	2218.21	2241.48	840.041	677.803	898.873	594.679	637.062	720.652	1079.17	771.988	1533.32		1657.05	-0.725842	0.604644	0.206707	-3.51146	0.000445656	0.00973511		1657.05	-0.571924	0.672719	0.23113	-2.47447	0.0133435	0.188263		1657.05	-0.307429	0.808081	0.209964	-1.4642	0.14314	0.973655		1657.05	0.48623	1.40078	0.208988	2.32659	0.019987
T22C1.6	clc-5	3092.84	2573.33	2961.23	2155	2186.66	2268.96	2313.77	2348.64	1461.41	1491.38	1385.41	1317.6	1456.78	1317.21	1629.65	1452.63	1447.48		1932.94	-0.384005	0.766307	0.109444	-3.5087	0.000450299	0.00979301		1932.94	-0.30284	0.810655	0.122446	-2.47326	0.0133887	0.188527		1932.94	-0.0846026	0.943044	0.111387	-0.75954	0.44753	0.973655		1932.94	0.0617927	1.04376	0.111204	0.555672	0.578435
C50B8.3	nlp-1	792.407	730.022	842.222	550.339	514.32	551.687	557.095	579.505	250.33	209.921	218.941	180.493	213.839	231.638	257.417	265.987	361.418		429.858	-0.54867	0.68365	0.156686	-3.50172	0.000462265	0.00992154		429.858	-0.472078	0.720925	0.175517	-2.68965	0.00715268	0.15827		429.858	-0.118351	0.92124	0.169547	-0.698041	0.485151	0.973655		429.858	0.381257	1.30248	0.166954	2.28361	0.0223944
ZK742.2	C01C4.2	925.719	755.37	883.087	510.888	591.734	557.176	631.306	642.923	664.909	578.587	592.356	531.981	602.314	482.579	725.718	575.857	954.144		659.215	-0.627565	0.647268	0.179145	-3.50312	0.000459846	0.00992154		659.215	-0.423849	0.745433	0.20021	-2.11702	0.0342578	0.252156		659.215	-0.183445	0.880598	0.180094	-1.01861	0.30839	0.973655		659.215	0.296824	1.22844	0.179186	1.65652	0.0976168
H14E04.5	C01C4.3	1076.09	988.571	1174.13	725.895	782.615	721.859	812.26	820.055	601.584	461.616	519.376	445.534	420.55	558.873	597.999	499.732	623.446		695.894	-0.538442	0.688514	0.153741	-3.50226	0.000461331	0.00992154		695.894	-0.403637	0.75595	0.171972	-2.34711	0.0189197	0.20768		695.894	-0.151963	0.900025	0.157553	-0.964521	0.334785	0.973655		695.894	0.120367	1.08701	0.156855	0.767377	0.442857
K04G7.11	ark-1	4841.89	4214.86	4938.71	2816.79	2542.97	3118.91	3023.36	3213.52	725.265	493.992	633.712	489.232	498.067	534.974	786.112	494.359	958.662		2019.14	-0.722965	0.605851	0.206802	-3.49594	0.000472399	0.010095		2019.14	-0.581115	0.668447	0.231235	-2.51309	0.0119678	0.185416		2019.14	-0.28372	0.82147	0.211769	-1.33976	0.180324	0.973655		2019.14	0.272828	1.20817	0.210838	1.29402	0.195658
C47B2.2	rml-4	1092.09	1042.31	1152.2	780.14	727.472	777.668	733.983	827.708	386.874	307.048	370.983	316.339	282.446	320.8	465.331	343.902	480.686		612.234	-0.524068	0.695408	0.150037	-3.49292	0.000477773	0.0101656		612.234	-0.488812	0.712612	0.168105	-2.90777	0.00364011	0.129482		612.234	-0.211753	0.863487	0.158621	-1.33497	0.181887	0.973655		612.234	0.276187	1.21099	0.156775	1.76168	0.078123
B0205.8	C01F1.6	1134.75	832.428	1074.46	568.092	637.333	626.709	756.348	768.665	269.13	168.145	257.863	168.144	162.161	189.355	264.347	240.91	394.849		500.805	-0.731276	0.602371	0.209565	-3.48949	0.000483944	0.0102427		500.805	-0.411003	0.7521	0.234008	-1.75636	0.0790262	0.350703		500.805	-0.4192	0.747839	0.221407	-1.89335	0.0583119	0.973655		500.805	0.373815	1.29577	0.217911	1.71545	0.0862623
F58G11.6	rga-6	1602.94	1490.46	1827.97	1158.87	1235.43	1054.88	1332.76	1367.85	468.009	456.395	469.506	430.334	465.991	477.983	519.784	385.098	554.777		899.944	-0.513171	0.70068	0.1471	-3.4886	0.000485563	0.0102427		899.944	-0.280908	0.823073	0.164341	-1.70931	0.0873943	0.363293		899.944	-0.0202015	0.986095	0.153682	-0.13145	0.895419	0.993187		899.944	0.0661325	1.04691	0.153462	0.430936	0.666515
C44B7.1	C01F6.2	759.345	792.885	980.765	520.751	481.446	571.815	557.095	584.972	492.745	413.575	487.751	417.035	428.569	527.62	625.721	464.805	817.709		583.8	-0.686158	0.621507	0.196871	-3.48532	0.000491545	0.0103245		583.8	-0.564485	0.676197	0.220292	-2.56244	0.0103941	0.182581		583.8	-0.0215176	0.985196	0.199052	-0.1081	0.913916	0.994499		583.8	0.453099	1.36898	0.198094	2.28729	0.0221788
Y43F4B.10	fem-3	2432.68	2153.56	2685.14	1364.01	1353.14	1634.02	1600.12	1633.55	577.837	413.575	497.482	407.535	443.716	566.226	733.638	511.375	958.662		1174.49	-0.740695	0.598451	0.212764	-3.4813	0.000498977	0.0104294		1174.49	-0.584116	0.667058	0.237909	-2.4552	0.0140806	0.192931		1174.49	-0.0710857	0.951921	0.217639	-0.326622	0.743954	0.975947		1174.49	0.565379	1.47978	0.216551	2.61084	0.009032
F29B9.10	znf-706	686.824	679.326	745.54	521.737	375.401	563.581	479.833	450.483	330.475	383.288	345.44	324.888	328.778	330.912	411.867	421.817	387.621		456.93	-0.530181	0.692468	0.152336	-3.48034	0.000500782	0.0104294		456.93	-0.597519	0.660889	0.171345	-3.48723	0.000488057	0.0821654		456.93	-0.105378	0.929561	0.157676	-0.668322	0.503928	0.973655		456.93	0.20539	1.153	0.156528	1.31216	0.189466
F25H2.11	C01G10.10	15650.8	14647.1	17784.3	10836.2	9359.57	11214.9	10467.9	11079.5	7448.56	7204.14	7540.07	6463.57	6725.24	8815.12	8168.04	7962.58	11962.9		10195.9	-0.61423	0.653279	0.17661	-3.47788	0.000505398	0.0104387		10195.9	-0.57304	0.672199	0.197479	-2.90177	0.00371058	0.129482		10195.9	-0.012317	0.991499	0.176833	-0.0696532	0.94447	0.996321		10195.9	0.340181	1.26592	0.176782	1.92429	0.0543178
K04F10.3	unc-76	1611.48	1397.18	1735.28	976.408	993.646	995.415	1010.5	1196.19	523.418	510.702	552.217	382.836	436.588	488.095	655.423	442.415	838.49		867.428	-0.677829	0.625105	0.194962	-3.47671	0.000507599	0.0104387		867.428	-0.519403	0.697661	0.218013	-2.38244	0.0171983	0.205487		867.428	-0.278463	0.824469	0.199381	-1.39664	0.162522	0.973655		867.428	0.287781	1.22076	0.198211	1.45189	0.146533
M176.2	dnj-3	1393.91	1327.22	1492.08	1141.12	1100.75	1041.16	1122.32	1171.04	894.461	850.126	813.73	766.622	844.665	801.541	894.029	883.935	944.205		1028.41	-0.360179	0.779068	0.103575	-3.47748	0.000506146	0.0104387		1028.41	-0.292691	0.816378	0.11601	-2.52298	0.0116364	0.185416		1028.41	-0.0849807	0.942797	0.106154	-0.800539	0.423398	0.973655		1028.41	0.0889099	1.06357	0.105763	0.840648	0.400545
T10F2.5	txt-12	491.655	478.57	650.853	330.401	343.587	354.983	350.726	333.489	39.5779	34.4646	35.2738	35.1487	24.0569	37.6872	28.7119	31.3452	47.8879		214.613	-0.655915	0.634673	0.189135	-3.46797	0.000524413	0.0107395		214.613	-0.659606	0.633051	0.212367	-3.10598	0.0018965	0.104274		214.613	-0.179475	0.883024	0.269735	-0.665376	0.50581	0.973655		214.613	-0.0164114	0.988689	0.26611	-0.0616714	0.950824
D2096.8	ahsa-1	10298.1	10028.7	11539.9	6955.18	7675.57	6917.59	8075.84	8529.66	10294.2	9167.58	10941	8624.74	8183.8	10579.1	11172.9	8947.72	13686.9		9506.96	-0.564507	0.676186	0.163193	-3.45913	0.000541924	0.0110521		9506.96	-0.355442	0.78163	0.182446	-1.94821	0.0513898	0.294098		9506.96	-0.15065	0.900844	0.163137	-0.923456	0.35577	0.973655		9506.96	0.153172	1.11201	0.163099	0.939139	0.347659
C41G7.1	C01G10.9	2015.68	1597.94	1973.49	1061.23	1095.45	1063.12	1169.09	1242.11	689.645	561.877	705.476	466.433	546.181	591.045	806.903	636.756	1404.11		1036.85	-0.795135	0.576289	0.230383	-3.45137	0.000557754	0.0113279		1036.85	-0.627404	0.64734	0.25761	-2.43548	0.014872	0.198805		1036.85	-0.286968	0.819623	0.233242	-1.23034	0.21857	0.973655		1036.85	0.541529	1.45551	0.232137	2.3328	0.0196584
Y37E11B.3	madf-5	595.105	581.99	688.728	411.275	426.303	416.281	400.539	459.231	237.467	195.299	205.561	170.044	188.891	212.335	304.94	230.164	344.251		356.965	-0.573699	0.671892	0.166428	-3.44712	0.000566594	0.0114132		356.965	-0.533421	0.690914	0.186665	-2.85765	0.00426797	0.135603		356.965	-0.160989	0.894412	0.178299	-0.902915	0.366571	0.973655		356.965	0.460542	1.37606	0.175044	2.63101	0.00851303
F25H5.6	C01G12.16	567.376	492.765	644.873	393.522	317.076	378.77	365.975	410.027	2300.47	1626.1	1940.06	1649.14	1781.1	1641.69	2552.39	1695.33	2154.05		1230.04	-0.645734	0.639167	0.187284	-3.44788	0.000564997	0.0114132		1230.04	-0.551086	0.682506	0.209775	-2.62704	0.00861317	0.169966		1230.04	-0.210084	0.864487	0.180833	-1.16175	0.245335	0.973655		1230.04	0.125646	1.091	0.180625	0.695618	0.486668
F38E9.5	C01G12.3	2234.31	2218.46	1929.63	3017	3244.99	2451.94	3047.76	2966.41	3540.24	3805.72	3468.99	3934.76	3693.18	3965.42	3120.69	3298.41	2794.67		3101.92	0.449034	1.36513	0.130366	3.4444	0.000572328	0.0114341		3101.92	0.499327	1.41355	0.145708	3.42689	0.000610533	0.085295		3101.92	0.100192	1.07192	0.12961	0.773025	0.439508	0.973655		3101.92	-0.231236	0.851905	0.129783	-1.78172	0.0747949
R08D7.2	C01G12.7	788.141	709.744	928.935	488.204	519.623	510.516	567.261	640.736	321.57	255.873	250.565	244.141	232.55	247.264	351.473	241.806	444.544		455.468	-0.676699	0.625595	0.196455	-3.44455	0.000572002	0.0114341		455.468	-0.421772	0.746507	0.219431	-1.92212	0.0545907	0.302927		455.468	-0.195275	0.873407	0.204266	-0.95598	0.339082	0.973655		455.468	0.324223	1.25199	0.202347	1.60231	0.109086
Y59A8A.1	catp-4	3642.09	3399.67	3929.04	2576.14	2737.03	2451.94	2898.32	3068.1	0	0	0	0	0.890996	0	0.990065	0	0		1453.19	-0.498701	0.707744	0.144831	-3.44332	0.000574615	0.0114341		1453.19	-0.293818	0.815741	0.161891	-1.81491	0.069538	0.332998		1453.19	0.731129	1.65994	1.67203	0.437272	0.661914	0.974801		1453.19	0.745219	1.67623	1.67203	0.445698	0.655815
R04F11.2	aqp-2	5155.44	4300.03	5722.12	3412.5	3320.28	3472.06	3251.08	3718.67	1878.96	1900.77	2123.72	1753.64	1764.17	2235.49	2096.96	2290.89	3008.81		3023.86	-0.572673	0.67237	0.166496	-3.43956	0.000582668	0.0115325		3023.86	-0.537862	0.688791	0.186224	-2.88825	0.00387395	0.129482		3023.86	-0.0369722	0.974698	0.167612	-0.220582	0.825418	0.990418		3023.86	0.325626	1.25321	0.167399	1.9452	0.0517504
Y71G12A.3	C01G6.3	2222.58	2390.82	1755.21	3160.01	3360.58	2644.99	3186.01	3379.72	2720.98	2748.81	2647.97	2948.69	2898.41	2482.76	3195.93	2602.55	2593.18		2761.13	0.525161	1.43909	0.152715	3.43882	0.000584249	0.0115325		2761.13	0.628983	1.54647	0.170654	3.68572	0.000228058	0.0769616		2761.13	0.0371621	1.02609	0.152545	0.243613	0.80753	0.988		2761.13	0.0476999	1.03362	0.152548	0.312688	0.754518
T23B12.1	C01G6.4	1000.37	942.945	1142.23	662.774	571.585	623.964	667.904	691.033	79.1558	77.2842	92.4416	73.1474	67.7157	91.9199	97.0264	84.1843	174.384		420.004	-0.731428	0.602307	0.213376	-3.42789	0.000608287	0.0119589		420.004	-0.598177	0.660588	0.238689	-2.50609	0.0122073	0.185416		420.004	-0.0939044	0.936984	0.247013	-0.38016	0.703827	0.974801		420.004	0.518977	1.43294	0.241296	2.15079	0.0314926
T14B4.3	C01G6.5	1055.83	953.084	1210.01	611.488	646.877	749.306	689.252	719.461	205.805	197.388	204.345	170.994	187.109	203.143	287.119	226.581	432.798		514.741	-0.680828	0.623807	0.199035	-3.42065	0.000624721	0.0121364		514.741	-0.607344	0.656404	0.222784	-2.72616	0.00640763	0.153718		514.741	-0.114085	0.923968	0.212242	-0.537525	0.590905	0.973655		514.741	0.639948	1.55827	0.208996	3.06201	0.00219853
Y39A1A.9	mtrr-1	63.9898	80.0996	37.8751	115.394	110.287	117.108	58.9626	65.6044	230.541	319.581	261.512	369.537	267.299	228.88	205.934	205.983	146.374		169.704	0.915389	1.88608	0.267465	3.42246	0.000620566	0.0121364		169.704	0.038716	1.0272	0.310857	0.124546	0.900883	0.969569		169.704	0.0927439	1.0664	0.242482	0.382478	0.702107	0.974801		169.704	-0.5402	0.687676	0.245054	-2.20441	0.0274954
C42C1.13	acs-7	318.882	240.299	317.951	184.433	154.826	156.449	158.589	168.385	103.892	103.394	108.254	59.8478	103.356	111.223	116.828	105.678	185.227		158.677	-0.82312	0.565218	0.240586	-3.42131	0.000623211	0.0121364		158.677	-0.83876	0.559124	0.270704	-3.09844	0.00194543	0.104274		158.677	-0.199267	0.870993	0.255756	-0.779129	0.435904	0.973655		158.677	0.371176	1.29341	0.251363	1.47665	0.139768
T04A8.8	cam-1	3572.76	3367.23	4285.86	2097.8	1968.2	2158.26	2317.84	2463.44	369.064	318.536	368.55	300.189	288.683	327.235	369.294	325.095	798.734		1511.58	-0.850831	0.554465	0.249634	-3.40831	0.00065366	0.0126486		1511.58	-0.646422	0.638863	0.279098	-2.31611	0.020552	0.212396		1511.58	-0.205108	0.867474	0.256946	-0.798254	0.424723	0.973655		1511.58	0.500078	1.41429	0.255395	1.95806	0.0502234
H27M09.2	C01G6.9	4845.09	4248.32	5031.4	2950.92	2833.53	2870.97	3016.24	3404.87	1832.46	1526.89	1947.36	1306.2	1445.2	1902.74	2401.9	1722.2	3239.21		2736.79	-0.706549	0.612784	0.207737	-3.40117	0.000670981	0.0128823		2736.79	-0.552408	0.681881	0.232273	-2.37827	0.0173942	0.205487		2736.79	-0.189138	0.87713	0.208812	-0.90578	0.365052	0.973655		2736.79	0.472669	1.38767	0.208456	2.26747	0.0233613
B0361.8	cln-3.2	1606.14	1457	1761.19	1113.5	1174.98	1055.8	1228.05	1327.4	2428.1	2147.25	2461.87	2178.27	2144.63	2684.06	2744.46	2284.62	3248.25		1943.86	-0.528854	0.693105	0.155462	-3.40183	0.000669357	0.0128823		1943.86	-0.33192	0.794478	0.173756	-1.91027	0.0560989	0.306522		1943.86	-0.00614082	0.995753	0.153965	-0.0398846	0.968185	1		1943.86	0.234229	1.17628	0.153836	1.52259	0.127863
Y119C1B.4	erm-1	788.141	746.245	892.057	615.433	614.003	632.199	672.987	687.752	545.186	508.614	490.184	533.881	555.982	536.812	603.94	572.274	565.62		621.253	-0.382302	0.767213	0.11256	-3.39641	0.000682754	0.0130573		621.253	-0.249792	0.841018	0.125906	-1.98396	0.0472603	0.282966		621.253	0.0742987	1.05285	0.115418	0.643737	0.519746	0.973655		621.253	0.17255	1.12705	0.115131	1.49873	0.133944
C01G6.1	hpo-32	21392.9	21682.7	18089.3	31229.3	29558	27440.7	28335.6	27467.5	32988.2	38833.2	40263.2	47525.8	32741.4	39055.8	30498	29614.1	25059.8		30692.7	0.528536	1.44246	0.155824	3.39189	0.000694129	0.0131961		30692.7	0.452612	1.36852	0.17422	2.59793	0.00937886	0.176318		30692.7	0.0902926	1.06459	0.155753	0.579717	0.562106	0.973655		30692.7	-0.39613	0.759894	0.155774	-2.54298	0.0109913
Y102E9.2	let-526	3470.38	3211.08	3394.8	2308.86	2465.56	2154.6	2586.22	2851.6	59.3668	55.3522	64.4659	50.3482	56.1328	74.4551	64.3542	53.7347	91.2581		1353.68	-0.540337	0.68761	0.159326	-3.39139	0.000695379	0.0131961		1353.68	-0.304939	0.809477	0.178076	-1.71241	0.086822	0.361762		1353.68	0.0177574	1.01238	0.219118	0.0810403	0.93541	0.994546		1353.68	0.228492	1.17161	0.216024	1.05772	0.290184
Y56A3A.19	col-61	2227.91	2223.53	2339.28	1488.28	1339.35	1592.85	1406.97	1523.11	488.787	457.439	520.592	456.933	457.972	636.086	417.808	537.347	698.441		1106.63	-0.619203	0.65103	0.182713	-3.38895	0.000701614	0.0132632		1106.63	-0.627734	0.647192	0.204499	-3.06962	0.0021433	0.104704		1106.63	0.0809363	1.0577	0.188085	0.430317	0.666965	0.974801		1106.63	0.174055	1.12823	0.187912	0.926259	0.354311
F29G9.3	nhr-23	1418.44	1452.95	1582.78	1052.35	900.326	1161.93	995.248	1001.56	851.914	867.881	1010.78	797.971	835.755	1065.35	1060.36	1046.93	1240.57		1079	-0.515669	0.699468	0.152211	-3.38785	0.000704433	0.0132655		1079	-0.572575	0.672415	0.170634	-3.35558	0.000792001	0.0956441		1079	-0.0159951	0.988974	0.153509	-0.104197	0.917013	0.994499		1079	0.294829	1.22674	0.15308	1.92599	0.0541062
ZK1010.10	gst-33	236.762	225.09	262.135	168.652	159.068	181.151	193.153	202.28	361.148	347.779	332.06	337.238	330.56	403.528	351.473	318.826	345.154		279.768	-0.507406	0.703486	0.149915	-3.38463	0.000712746	0.0133708		279.768	-0.288281	0.818877	0.166951	-1.72674	0.0842153	0.357002		279.768	0.0404782	1.02845	0.139452	0.290266	0.771613	0.979448		279.768	-0.0371396	0.974585	0.139875	-0.265521	0.790608
C08B11.7	snpn-1	2683.31	2494.24	3156.59	1780.22	1728.54	1788.64	1958.98	2103.71	1798.82	1394.25	1727.2	1267.25	1444.31	1719.82	2408.83	1661.3	2862.43		1998.73	-0.65375	0.635626	0.193438	-3.37965	0.000725793	0.0134108		1998.73	-0.451695	0.731183	0.21625	-2.08876	0.0367293	0.258593		1998.73	-0.150894	0.900692	0.194073	-0.777508	0.436859	0.973655		1998.73	0.494648	1.40898	0.193679	2.55396	0.0106506
Y24D9A.4	adt-1	4660.59	4630.57	3955.95	5986.67	6334.09	5852.64	5601.45	5707.58	11383.6	13104.9	13477	14009.1	11836	13910.2	10095.7	11982.8	9281.22		8930.01	0.456155	1.37188	0.134949	3.38021	0.000724313	0.0134108		8930.01	0.356792	1.28057	0.150919	2.36413	0.0180725	0.205487		8930.01	0.0664963	1.04717	0.13433	0.495022	0.620584	0.973655		8930.01	-0.275712	0.826043	0.13438	-2.05173	0.0401959
C44E4.6	nhr-17	2438.01	2285.37	2660.22	1583.95	1552.51	1700.81	1591.99	1550.45	438.325	633.939	664.12	619.378	643.299	826.36	575.228	783.631	783.374		1254.76	-0.610067	0.655166	0.180437	-3.38105	0.000722101	0.0134108		1254.76	-0.647475	0.638397	0.201972	-3.20577	0.00134702	0.0983518		1254.76	0.268082	1.20421	0.184552	1.45261	0.146332	0.973655		1254.76	0.304811	1.23526	0.184515	1.65196	0.0985424
ZK637.2	C02B8.12	714.553	703.66	910.995	476.369	503.716	555.347	517.448	572.945	375.99	426.107	409.906	319.188	318.977	399.851	385.135	384.203	552.066		501.556	-0.601097	0.659253	0.177816	-3.38044	0.000723696	0.0134108		501.556	-0.510451	0.702003	0.199088	-2.56394	0.010349	0.182517		501.556	-0.223237	0.856641	0.181848	-1.22761	0.219595	0.973655		501.556	0.125456	1.09085	0.180797	0.693905	0.487742
Y43F8C.3	hlh-8	835.067	794.913	655.836	1161.83	1219.52	934.117	1142.65	1056.23	277.045	344.646	317.464	342.938	332.342	324.477	288.109	261.509	216.851		617.973	0.536303	1.45025	0.158833	3.37652	0.000734092	0.0135133		617.973	0.52939	1.44332	0.177553	2.98159	0.0028676	0.120716		617.973	0.0908049	1.06496	0.167297	0.542776	0.587284	0.973655		617.973	-0.293456	0.815945	0.169111	-1.73529	0.0826899
T24B8.2	frpr-1	2894.47	2383.72	2852.59	1683.56	1740.21	1813.34	1952.88	1956.1	965.701	755.087	884.277	752.373	771.603	739.955	1213.82	826.618	1535.12		1513.03	-0.634573	0.644131	0.188024	-3.37495	0.00073828	0.0135397		1513.03	-0.47162	0.721154	0.210231	-2.24334	0.0248747	0.226487		1513.03	-0.202536	0.869021	0.190812	-1.06144	0.288488	0.973655		1513.03	0.456723	1.37242	0.190012	2.40365	0.0162323
F11A10.5	tyr-1	3591.96	3447.33	3901.13	2964.73	2679.77	2535.2	2994.89	3116.21	1287.27	1249.08	1384.19	1395.5	1273.23	1285.04	1505.89	1161.56	1371.58		2184.97	-0.419631	0.747616	0.124385	-3.37366	0.000741765	0.0135531		2184.97	-0.255257	0.837838	0.139054	-1.83567	0.0664065	0.32721		2184.97	0.0124349	1.00866	0.126825	0.0980477	0.921894	0.994499		2184.97	0.0429519	1.03022	0.126804	0.338726	0.734816
C30A5.3	cup-4	5657.76	5174.03	5345.37	3669.91	3778.4	3510.49	3675	4244.6	2158.97	1723.23	2060.48	1679.54	1679.53	1774.05	2528.63	1584.28	2438.67		3099	-0.561891	0.677413	0.166834	-3.36797	0.000757232	0.0137844		3099	-0.445535	0.734312	0.186552	-2.38825	0.0169286	0.204649		3099	-0.211253	0.863787	0.168126	-1.25651	0.208929	0.973655		3099	0.140579	1.10235	0.167895	0.837302	0.402423
C14B1.8	sup-18	982.243	787.815	1053.52	579.927	560.98	656.901	660.788	727.115	359.169	368.667	417.204	291.639	349.271	354.811	514.834	368.082	646.035		569.353	-0.650941	0.636865	0.193371	-3.36628	0.000761893	0.0138181		569.353	-0.439794	0.73724	0.216115	-2.035	0.0418505	0.271332		569.353	-0.200469	0.870268	0.198458	-1.01013	0.312431	0.973655		569.353	0.417888	1.33597	0.196795	2.12347	0.0337148
T26A5.8	olrn-1	1825.84	1697.3	2105.06	1200.29	1066.82	1116.18	1168.07	1351.45	410.621	344.646	478.02	353.387	407.185	503.721	541.566	432.564	829.455		931.304	-0.734232	0.601138	0.218204	-3.36489	0.000765749	0.013837		931.304	-0.574682	0.671434	0.243996	-2.35529	0.0185081	0.206379		931.304	0.0368514	1.02587	0.223538	0.164855	0.869058	0.993187		931.304	0.549403	1.46348	0.222548	2.4687	0.0135606
C29F9.7	lron-3	1409.91	1445.85	1328.62	2065.25	1939.57	1607.49	1901.04	1913.46	2153.04	2407.3	2274.55	2402.46	2518.85	2639.94	2225.67	2434.18	2018.52		2040.33	0.423334	1.34102	0.126	3.35979	0.000780009	0.014043		2040.33	0.451476	1.36744	0.140838	3.20564	0.00134764	0.0983518		2040.33	0.145783	1.10633	0.124831	1.16784	0.24287	0.973655		2040.33	-0.0333555	0.977145	0.124977	-0.266894	0.789551
Y65B4BR.3	jud-4	679.358	771.593	595.037	1002.05	1011.67	851.776	962.717	881.285	1461.41	1610.44	1727.2	1893.28	1912.08	1729.01	1651.43	1741.9	1400.5		1287.22	0.485671	1.40024	0.1449	3.35176	0.000803002	0.0144042		1287.22	0.435274	1.35217	0.162106	2.68511	0.00725056	0.159445		1287.22	0.206057	1.15353	0.141603	1.45517	0.145622	0.973655		1287.22	-0.00123564	0.999144	0.141806	-0.00871359	0.993048
T12G3.5	ser-2	1511.23	1381.97	1538.92	1014.87	822.913	1093.31	944.418	1001.56	712.402	613.052	620.332	602.278	576.475	813.491	736.609	668.997	952.337		917.951	-0.596118	0.661532	0.177945	-3.35002	0.000808057	0.0144422		917.951	-0.602605	0.658564	0.19928	-3.02391	0.00249529	0.111817		917.951	0.0336099	1.02357	0.180558	0.186145	0.852331	0.991329		917.951	0.276883	1.21157	0.180168	1.53681	0.12434
R04F11.5	C02D5.2	653.762	681.354	860.162	542.449	507.958	494.048	496.099	559.824	224.605	246.474	245.7	230.842	261.062	289.548	326.722	296.436	362.322		428.198	-0.507759	0.703314	0.151849	-3.34383	0.00082629	0.0147145		428.198	-0.471657	0.721136	0.170285	-2.7698	0.00560899	0.150241		428.198	0.125826	1.09113	0.16232	0.775172	0.438238	0.973655		428.198	0.460116	1.37565	0.160814	2.86117	0.0042208
F54E7.8	nra-4	2222.58	1805.79	2307.39	1195.36	1213.16	1285.44	1435.43	1480.47	1129.95	726.889	1059.43	690.625	741.309	910.007	1522.72	982.449	2043.82		1338.4	-0.7783	0.583053	0.23313	-3.33849	0.00084236	0.0149404		1338.4	-0.534618	0.690341	0.260596	-2.05152	0.0402162	0.266964		1338.4	-0.316305	0.803124	0.234621	-1.34815	0.177609	0.973655		1338.4	0.641478	1.55993	0.233784	2.7439	0.00607147
F23F1.10	tsp-17	508.719	319.385	507.326	224.87	252.388	258.003	236.867	254.764	81.1347	64.7516	82.7109	65.5476	70.3887	90.0815	100.987	87.7666	187.034		199.572	-0.860796	0.550649	0.257909	-3.3376	0.000845052	0.0149404		199.572	-0.856745	0.552197	0.289345	-2.96098	0.00306664	0.121995		199.572	-0.0149869	0.989666	0.283633	-0.0528388	0.95786	0.99909		199.572	0.719306	1.64639	0.277709	2.59015	0.00959353
ZK546.13	snet-1	1701.06	1481.34	1962.53	1068.13	1209.98	1069.52	1159.94	1286.94	615.436	466.838	554.65	455.034	476.683	519.347	700.966	482.716	805.963		942.18	-0.6202	0.650581	0.185979	-3.33478	0.00085368	0.0150388		942.18	-0.487373	0.713323	0.207995	-2.3432	0.0191193	0.207846		942.18	-0.173967	0.886402	0.19041	-0.913645	0.360904	0.973655		942.18	0.281179	1.21519	0.189496	1.48382	0.137856
F21D5.6	tag-52	2544.66	2276.25	2868.54	1679.62	1568.41	1615.72	1713.98	1847.86	865.767	717.49	940.229	717.224	729.726	914.603	1060.36	793.482	1452.9		1429.81	-0.660804	0.632526	0.198627	-3.32686	0.000878306	0.0151424		1429.81	-0.525352	0.694789	0.222115	-2.36523	0.0180188	0.205487		1429.81	-0.0953042	0.936075	0.201139	-0.473822	0.635627	0.973655		1429.81	0.390373	1.31073	0.200577	1.94625	0.0516252
B0495.8	tag-278	2921.13	2430.36	2802.75	1721.04	1939.57	1830.72	1970.16	2059.98	1944.26	1512.26	1791.66	1481	1608.25	1496.46	2265.27	1600.4	2611.25		1999.21	-0.570421	0.67342	0.171424	-3.32755	0.000876138	0.0151424		1999.21	-0.43176	0.741357	0.191688	-2.25241	0.0242965	0.225079		1999.21	-0.194668	0.873774	0.172039	-1.13154	0.257829	0.973655		1999.21	0.303394	1.23404	0.171693	1.76707	0.0772166
F25H8.5	tax-6	50.1253	67.9326	71.7633	111.449	162.25	166.513	80.3111	63.4176	394.79	435.507	332.06	453.134	532.816	280.356	206.924	464.805	133.725		235.757	1.21262	2.31758	0.364388	3.32783	0.000875253	0.0151424		235.757	0.183587	1.1357	0.415447	0.441902	0.65856	0.871516		235.757	0.123276	1.08921	0.346881	0.355384	0.722302	0.974949		235.757	-0.52902	0.693025	0.34816	-1.51947	0.128643
C43E11.2	C02F4.4	714.553	636.741	781.422	492.149	494.172	451.048	567.261	554.357	0	0	6.08169	4.74983	2.67299	1.8384	2.9702	1.79116	7.22837		277.59	-0.569615	0.673797	0.171263	-3.32597	0.000881123	0.0151424		277.59	-0.342142	0.788869	0.19127	-1.78879	0.0736488	0.33952		277.59	0.769298	1.70444	0.806048	0.954408	0.339877	0.973655		277.59	1.15967	2.23407	0.775795	1.49482	0.134962
D1054.15	C02F5.13	6788.25	6078.45	7250.08	4360.3	4535.56	4198.49	4999.62	5180.56	2625.99	1881.97	2584.72	2062.38	1831.89	2358.66	3276.13	2067.89	3144.34		3836.78	-0.619481	0.650905	0.186137	-3.32808	0.000874453	0.0151424		3836.78	-0.397684	0.759076	0.208091	-1.9111	0.0559912	0.306522		3836.78	-0.181748	0.881634	0.187105	-0.971371	0.331363	0.973655		3836.78	0.259126	1.19675	0.186896	1.38648	0.165602
Y71F9B.5	C02F5.2	1137.95	1257.26	1029.6	1761.48	1730.66	1419.93	1639.77	1721.02	159.301	169.19	165.422	187.143	156.815	159.941	184.152	129.859	131.014		772.972	0.520111	1.43407	0.156212	3.32952	0.000869969	0.0151424		772.972	0.557728	1.47195	0.174578	3.19472	0.00139964	0.0983518		772.972	0.0285192	1.01996	0.178097	0.160133	0.872776	0.993187		772.972	-0.153091	0.899322	0.179644	-0.852191	0.394108
K10C3.2	henn-1	7695.84	7038.63	7972.7	5365.31	6323.49	4751.1	6100.59	6669.78	1006.27	891.901	1036.32	960.415	989.897	925.633	1131.64	876.771	1030.04		3574.49	-0.466076	0.723931	0.140111	-3.32648	0.000879498	0.0151424		3574.49	-0.245412	0.843575	0.156624	-1.56689	0.117141	0.413178		3574.49	-0.0287648	0.980259	0.144381	-0.199228	0.842084	0.991268		3574.49	0.050152	1.03537	0.144281	0.347599	0.728142
K03B4.3	tsp-1	2241.78	1874.74	2375.16	1306.81	1309.66	1351.31	1498.46	1582.16	987.469	789.552	911.037	713.424	719.925	776.723	1198.97	698.551	1503.5		1284.66	-0.710232	0.611222	0.213684	-3.32374	0.000888183	0.0151818		1284.66	-0.490435	0.71181	0.238871	-2.05314	0.0400595	0.266964		1284.66	-0.282508	0.82216	0.215684	-1.30983	0.190254	0.973655		1284.66	0.339256	1.2651	0.214993	1.57799	0.114568
C48E7.2	pbs-6	1080.36	1029.13	1236.92	789.017	766.709	779.498	891.555	904.247	1023.09	895.035	947.527	806.521	809.916	807.976	1177.19	824.827	1269.48		943.47	-0.519098	0.697808	0.1562	-3.3233	0.000889598	0.0151818		943.47	-0.313135	0.804891	0.174533	-1.79414	0.0727916	0.337709		943.47	-0.241375	0.845939	0.156388	-1.54344	0.122724	0.973655		943.47	0.190712	1.14133	0.155752	1.22446	0.220778
F46H6.1	C02G6.3	1462.17	1351.55	1605.7	1118.43	1035	962.479	1154.85	1256.32	465.04	363.445	424.502	349.587	380.455	462.357	553.446	494.359	624.35		827.297	-0.504379	0.704964	0.152148	-3.31506	0.000916219	0.0153413		827.297	-0.289312	0.818292	0.170005	-1.70178	0.0887963	0.365738		827.297	-0.0715598	0.951609	0.159404	-0.448922	0.653488	0.973655		827.297	0.416101	1.33432	0.15799	2.63372	0.00844556
C07A9.2	dyf-11	3101.37	2663.57	3200.44	1788.11	1845.19	1810.59	1938.65	2076.38	984.5	730.022	966.988	638.377	681.612	908.168	1205.9	931.401	1806.19		1604.56	-0.719733	0.60721	0.21716	-3.3143	0.000918729	0.0153413		1604.56	-0.574016	0.671744	0.242824	-2.36392	0.0180829	0.205487		1604.56	-0.267027	0.83103	0.219643	-1.21573	0.224087	0.973655		1604.56	0.556608	1.47081	0.218802	2.54389	0.0109625
ZK1010.3	npr-19	3125.9	2467.88	3069.87	1779.23	1727.48	1795.04	2008.79	2108.09	1390.17	952.475	1244.31	935.716	1074.54	1054.32	1634.6	1123.05	2238.08		1748.8	-0.708466	0.61197	0.213552	-3.31754	0.000908132	0.0153413		1748.8	-0.488464	0.712783	0.238731	-2.04608	0.0407482	0.268271		1748.8	-0.22704	0.854386	0.214997	-1.05602	0.29096	0.973655		1748.8	0.477902	1.39272	0.214444	2.22856	0.025843
T24H10.3	aex-3	3461.85	2745.69	3757.6	1903.5	2161.21	1959.72	2212.11	2510.46	1209.1	902.345	1116.6	784.672	949.802	980.785	1528.66	944.835	1893.83		1824.87	-0.726117	0.604529	0.219127	-3.31367	0.000920793	0.0153413		1824.87	-0.492398	0.710843	0.244961	-2.0101	0.0444203	0.276578		1824.87	-0.249494	0.841192	0.221055	-1.12865	0.259045	0.973655		1824.87	0.436017	1.35286	0.220461	1.97775	0.0479568
W04D2.4	C03A3.1	3666.61	3376.35	3989.84	2629.4	2836.72	2413.52	2872.9	2957.66	3020.78	2449.07	2688.11	2292.27	2445.79	2639.02	3335.53	2586.43	3555.45		2926.79	-0.485752	0.714125	0.146528	-3.31509	0.000916149	0.0153413		2926.79	-0.335161	0.792696	0.16383	-2.04579	0.0407772	0.268271		2926.79	-0.145228	0.904236	0.146806	-0.989251	0.32254	0.973655		2926.79	0.21613	1.16161	0.146617	1.47411	0.140451
F44G4.1	C03A3.2	3224.02	2779.15	3047.94	2048.48	1858.98	2245.17	2174.5	2257.88	2272.76	2090.85	2352.4	1962.63	1875.55	2442.31	2163.29	2043.71	3046.76		2346.26	-0.556707	0.679852	0.167859	-3.31651	0.000911497	0.0153413		2346.26	-0.445047	0.734561	0.187723	-2.37076	0.0177515	0.205487		2346.26	-0.0966557	0.935198	0.16807	-0.575092	0.565229	0.973655		2346.26	0.111285	1.08019	0.167957	0.662581	0.507599
Y110A7A.8	C03A3.3	6209.14	5428.52	6228.45	4029.9	4253.48	3551.66	4543.17	4795.68	2276.72	1750.38	2240.49	1795.44	1682.2	1951.46	2805.84	1672.94	2328.44		3384.94	-0.594224	0.662401	0.179302	-3.3141	0.000919377	0.0153413		3384.94	-0.350956	0.784064	0.200436	-1.75096	0.0799524	0.351308		3384.94	-0.207146	0.866249	0.180467	-1.14783	0.251037	0.973655		3384.94	0.119023	1.086	0.180278	0.660221	0.509112
Y119D3B.15	C03B1.13	2982.99	2784.22	3464.57	1722.03	1931.09	1655.98	1996.6	1986.72	708.444	624.54	774.807	549.08	577.366	716.975	930.661	729	1704.99		1520	-0.798232	0.575054	0.241234	-3.30895	0.000936471	0.0154975		1520	-0.62769	0.647212	0.269726	-2.32714	0.0199579	0.21083		1520	-0.193045	0.874758	0.244303	-0.790185	0.42942	0.973655		1520	0.675119	1.59673	0.243353	2.77424	0.00553303
C26B2.7	C03B1.2	324.215	287.953	334.895	174.57	165.431	216.832	199.253	180.412	231.531	197.388	248.133	177.644	207.602	256.456	260.387	254.344	454.483		245.384	-0.764885	0.5885	0.231151	-3.30902	0.00093622	0.0154975		245.384	-0.733393	0.601488	0.259615	-2.82492	0.00472923	0.140289		245.384	-0.0762613	0.948513	0.231958	-0.328772	0.742328	0.975883		245.384	0.518999	1.43296	0.229819	2.2583	0.023927
F10E9.7	C03B1.5	1595.48	1336.35	1675.47	800.852	803.825	894.776	1008.46	993.906	113.786	67.8848	100.956	59.8478	46.3318	91.0007	143.559	77.9153	189.745		588.244	-0.882218	0.542533	0.266743	-3.30737	0.000941778	0.015533		588.244	-0.617239	0.651917	0.29815	-2.07023	0.0384307	0.26253		588.244	-0.519991	0.697376	0.295886	-1.75741	0.0788488	0.973655		588.244	0.540581	1.45456	0.287297	1.88161	0.0598894
C39E9.11	C03B1.7	3719.94	3179.65	3860.27	2383.82	2474.04	2214.98	2678.73	2838.48	2490.44	1856.91	2298.88	1798.28	1982.47	1795.2	2821.69	1854.74	3139.82		2552.25	-0.605361	0.657307	0.183139	-3.30547	0.000948166	0.0155861		2552.25	-0.378705	0.769128	0.20472	-1.84987	0.0643322	0.324623		2552.25	-0.253291	0.83898	0.183667	-1.37908	0.167871	0.973655		2552.25	0.233865	1.17598	0.183406	1.27512	0.202266
T27A3.6	C03B8.3	463.926	411.651	526.264	331.387	286.323	315.642	331.41	345.516	454.156	403.131	469.506	337.238	373.327	432.943	506.913	414.653	631.578		413.857	-0.586489	0.665961	0.177607	-3.30217	0.000959404	0.0157182		413.857	-0.465554	0.724193	0.198856	-2.34116	0.0192239	0.207846		413.857	-0.213877	0.862217	0.176621	-1.21094	0.225919	0.973655		413.857	0.227692	1.17096	0.175403	1.2981	0.194252
C36F7.2	lin-13	532.182	469.445	592.047	284.046	293.746	265.322	351.742	389.253	129.618	91.9055	111.903	116.846	103.356	137.88	162.371	147.77	379.489		268.172	-0.918809	0.528946	0.278743	-3.29626	0.000979809	0.0158828		268.172	-0.520024	0.69736	0.310973	-1.67225	0.0944759	0.375745		268.172	0.102152	1.07337	0.293294	0.348293	0.72762	0.975883		268.172	1.04872	2.06869	0.288924	3.62973	0.000283716
T01B7.4	rnr-2	1863.17	1738.87	2102.07	1214.1	1166.5	1199.44	1235.16	1408.31	580.806	489.815	588.707	478.783	472.228	610.348	767.301	597.35	1145.7		1038.74	-0.672023	0.627626	0.20392	-3.29553	0.000982375	0.0158828		1038.74	-0.52472	0.695094	0.228033	-2.30107	0.0213874	0.213687		1038.74	-0.0875721	0.941105	0.207894	-0.421234	0.673584	0.974801		1038.74	0.59761	1.51321	0.206796	2.88986	0.00385416
H20J04.8	rei-1	3198.42	2919.07	3121.7	2027.77	2000.02	2047.56	2071.82	2240.39	1110.16	921.144	1185.93	751.423	783.186	974.351	1474.21	1015.59	1752.88		1740.92	-0.604773	0.657575	0.183412	-3.29735	0.000976008	0.0158828		1740.92	-0.514407	0.700081	0.205131	-2.5077	0.0121519	0.185416		1740.92	-0.358408	0.780025	0.185835	-1.92864	0.0537759	0.973655		1740.92	0.399363	1.31893	0.185007	2.15864	0.0308783
Y6D11A.1	fog-3	1243.53	1182.23	1625.64	828.468	832.457	867.329	892.572	1019.05	405.673	366.578	423.285	302.089	294.92	410.882	385.135	376.143	623.446		710.555	-0.680315	0.624029	0.206427	-3.29567	0.000981856	0.0158828		710.555	-0.498872	0.70766	0.230795	-2.16154	0.0306536	0.245125		710.555	-0.245977	0.843244	0.212268	-1.15881	0.246535	0.973655		710.555	0.212719	1.15887	0.21108	1.00776	0.313568
F26F4.12	lab-1	926.785	858.79	984.751	597.68	541.892	629.454	655.705	662.604	275.066	176.5	200.696	151.995	175.526	222.446	292.069	215.834	331.601		464.67	-0.646804	0.638693	0.196376	-3.29371	0.000988751	0.0159335		464.67	-0.486439	0.713785	0.219604	-2.21507	0.0267551	0.23191		464.67	-0.247734	0.842218	0.208712	-1.18697	0.235241	0.973655		464.67	0.361799	1.28503	0.205876	1.75736	0.0788556
C23G10.2	rpl-24.2	983.31	885.152	1051.53	644.035	594.915	734.668	652.655	684.472	744.064	822.972	772.374	776.122	695.868	995.492	627.701	736.165	894.51		782.118	-0.564616	0.676135	0.171576	-3.29076	0.000999172	0.0160488		782.118	-0.541977	0.686829	0.192241	-2.81925	0.00481358	0.141139		782.118	0.0768482	1.05471	0.171483	0.448139	0.654053	0.973655		782.118	-0.0504056	0.965665	0.171717	-0.293539	0.76911
ZC395.10	gly-20	5578.84	4643.75	5781.93	3447.02	3355.28	3281.76	3515.39	3849.88	2096.64	2126.36	2487.41	1939.83	1933.46	2590.3	2788.02	2663.45	4627.96		3335.72	-0.666408	0.630073	0.202566	-3.28983	0.00100246	0.0160492		3335.72	-0.534726	0.69029	0.226498	-2.36084	0.0182334	0.206017		3335.72	-0.053899	0.963329	0.203293	-0.26513	0.79091	0.983921		3335.72	0.587169	1.5023	0.203036	2.89194	0.00382873
F56H1.7	kcnl-3	1922.89	1649.65	1990.43	1228.89	1144.23	1171.99	1181.28	1280.38	527.376	554.566	547.352	487.332	532.816	531.297	532.655	531.078	968.601		987.225	-0.649992	0.637284	0.197773	-3.28656	0.00101421	0.0161845		987.225	-0.591318	0.663736	0.221279	-2.67227	0.00753395	0.164142		987.225	-0.0704621	0.952333	0.201912	-0.348974	0.727109	0.975883		987.225	0.31939	1.2478	0.201211	1.58734	0.112436
F32H2.2	C03F11.2	822.269	687.437	929.932	514.833	494.172	590.113	499.149	558.731	555.08	454.306	541.27	397.086	417.877	493.61	705.917	517.644	813.191		587.801	-0.608969	0.655665	0.186073	-3.27274	0.00106509	0.0168325		587.801	-0.620807	0.650307	0.20864	-2.97549	0.00292522	0.120716		587.801	-0.244672	0.844007	0.188097	-1.30078	0.193335	0.973655		587.801	0.393383	1.31347	0.186728	2.10671	0.0351423
E02H1.8	scav-1	800.939	807.08	919.965	568.092	524.925	653.241	544.896	582.785	369.064	354.045	352.738	299.239	325.214	398.932	413.847	401.219	551.163		521.611	-0.533164	0.691038	0.162909	-3.27276	0.00106502	0.0168325		521.611	-0.579961	0.668982	0.182868	-3.17147	0.0015167	0.0989731		521.611	-0.0722405	0.95116	0.16877	-0.428041	0.668621	0.974801		521.611	0.344811	1.26998	0.167416	2.0596	0.0394366
F38H4.8	flp-5	490.588	526.224	609.988	431	374.34	376.026	387.323	448.297	784.632	674.67	718.855	735.273	711.906	744.551	826.704	690.491	802.349		607.836	-0.462002	0.725978	0.141117	-3.2739	0.00106076	0.0168325		607.836	-0.377267	0.769895	0.158178	-2.38508	0.0170753	0.205487		607.836	0.00861729	1.00599	0.137011	0.0628951	0.94985	0.996321		607.836	0.0901149	1.06445	0.136867	0.658414	0.510272
T24H10.6	C03H12.1	1453.63	1272.47	1589.76	884.685	777.313	1003.65	916.97	885.659	248.351	284.072	295.57	228.942	222.749	363.084	315.831	348.38	506.889		682.235	-0.694869	0.617766	0.212514	-3.26976	0.00107638	0.0168942		682.235	-0.674563	0.626522	0.237873	-2.83581	0.00457098	0.137317		682.235	-0.0223657	0.984617	0.221291	-0.101069	0.919495	0.994499		682.235	0.501605	1.41579	0.219706	2.28307	0.0224264
B0336.6	nstp-4	3161.1	2825.79	3488.49	2249.68	2433.74	2190.28	2570.97	2678.85	1597.96	1327.41	1441.36	1221.66	1324.91	1517.6	1854.39	1491.14	1871.24		2073.33	-0.463226	0.725362	0.141703	-3.26899	0.0010793	0.0168942		2073.33	-0.267003	0.831044	0.158392	-1.68571	0.0918516	0.371841		2073.33	-0.103693	0.930648	0.143328	-0.723469	0.469392	0.973655		2073.33	0.256318	1.19443	0.142978	1.79272	0.0730185
C47G2.3	C03H5.6	615.368	634.714	707.665	429.028	410.396	490.389	463.568	446.11	104.881	102.349	109.47	94.0466	91.7726	125.93	117.818	112.843	167.156		307.265	-0.557464	0.679496	0.170517	-3.26925	0.00107833	0.0168942		307.265	-0.520854	0.696959	0.191197	-2.72418	0.00644608	0.153886		307.265	-0.0217903	0.98501	0.199221	-0.109377	0.912903	0.994499		307.265	0.331158	1.25802	0.195972	1.68982	0.0910625
C56C10.3	C04A11.1	5082.92	4616.37	4809.13	3785.31	3709.47	3785.87	3866.12	3671.66	377.969	324.802	361.252	354.337	388.474	304.255	376.225	370.769	378.586		2150.8	-0.362989	0.777552	0.111191	-3.26456	0.00109636	0.0171067		2150.8	-0.359645	0.779356	0.124423	-2.8905	0.0038463	0.129482		2150.8	-0.0229127	0.984244	0.126401	-0.18127	0.856156	0.991517		2150.8	0.0810298	1.05777	0.125966	0.643268	0.52005
Y47G6A.9	C04A11.2	746.548	769.565	769.462	492.149	510.079	597.432	575.394	572.945	355.212	318.536	357.603	290.689	302.939	273.921	458.4	366.291	563.812		489.469	-0.514247	0.700159	0.157621	-3.26256	0.00110412	0.0171263		489.469	-0.408079	0.753626	0.176435	-2.31291	0.0207277	0.21279		489.469	-0.24906	0.841445	0.164371	-1.51523	0.129715	0.973655		489.469	0.429304	1.34658	0.161877	2.65203	0.00800093
Y47G6A.25	adm-2	624.967	553.6	883.087	354.071	436.907	324.791	470.684	529.209	2219.33	1564.48	2360.91	1474.35	1509.35	1566.31	2656.34	1650.55	4006.32		1363.84	-0.886421	0.540955	0.271705	-3.26244	0.00110459	0.0171263		1363.84	-0.459245	0.727367	0.303174	-1.51479	0.129826	0.433665		1363.84	-0.433376	0.740527	0.267832	-1.61809	0.105644	0.973655		1363.84	0.436158	1.353	0.267481	1.63061	0.102972
R11.1	tbc-6	1370.45	1199.47	1530.95	908.356	958.651	865.499	1001.35	1045.3	487.798	346.735	401.391	361.937	322.541	451.327	537.605	386.89	523.153		747.023	-0.585901	0.666233	0.17966	-3.26117	0.00110953	0.0171338		747.023	-0.417785	0.748573	0.200873	-2.07985	0.0375394	0.259965		747.023	-0.122703	0.918465	0.185777	-0.660487	0.508942	0.973655		747.023	0.226969	1.17037	0.184835	1.22795	0.219465
C30H6.7	egl-27	2936.06	2582.45	3032.99	2118.51	2101.82	2076.83	2116.55	2330.05	692.613	711.223	746.831	626.027	627.261	709.621	736.609	712.88	964.083		1518.97	-0.441486	0.736376	0.135403	-3.26053	0.00111204	0.0171338		1518.97	-0.358598	0.779922	0.151463	-2.36755	0.0179061	0.205487		1518.97	-0.13136	0.91297	0.140647	-0.933971	0.350319	0.973655		1518.97	0.16708	1.12278	0.140027	1.1932	0.232791
C46F11.3	dnj-5	342.345	328.51	398.685	215.007	237.542	197.619	249.066	272.258	85.0925	74.1511	98.5233	85.4969	62.3697	70.7783	113.858	78.8109	161.735		180.697	-0.719097	0.607478	0.220735	-3.25774	0.00112304	0.0172492		180.697	-0.452204	0.730925	0.246307	-1.83594	0.0663672	0.32721		180.697	-0.235678	0.849286	0.247144	-0.953603	0.340285	0.973655		180.697	0.462575	1.378	0.24036	1.92451	0.0542907
C06A8.2	C04C11.1	2204.45	1950.78	2389.12	1460.67	1581.14	1472.08	1617.4	1716.65	809.368	603.652	615.467	512.981	574.693	460.519	868.287	609.889	749.039		1188.01	-0.535978	0.689691	0.164691	-3.25445	0.00113612	0.0173958		1188.01	-0.388073	0.76415	0.184152	-2.10735	0.0350872	0.253113		1188.01	-0.390573	0.762827	0.169377	-2.30593	0.0211144	0.973655		1188.01	0.133416	1.09689	0.168288	0.792782	0.427905
Y49E10.15	lgc-9	5073.32	4265.56	4842.03	2743.81	2687.19	2988.99	2919.66	3284.59	1878.96	1449.6	1854.91	1395.5	1360.55	2299.84	2432.59	1894.15	3497.63		2756.99	-0.752016	0.593773	0.231539	-3.24791	0.00116258	0.0177378		2756.99	-0.607675	0.656253	0.25889	-2.34723	0.0189135	0.20768		2756.99	-0.035901	0.975422	0.232442	-0.154451	0.877254	0.993187		2756.99	0.594127	1.50956	0.232159	2.55913	0.0104934
D1054.3	pdhb-1	2467.87	2128.22	2832.66	1330.48	1392.38	1419.93	1467.97	1607.31	285.95	285.116	353.954	258.391	248.588	282.194	350.483	308.974	777.049		1046.91	-0.842518	0.557669	0.259464	-3.24715	0.00116568	0.0177378		1046.91	-0.687486	0.620935	0.290128	-2.3696	0.0178075	0.205487		1046.91	-0.228291	0.853645	0.267213	-0.854342	0.392915	0.973655		1046.91	0.636305	1.55434	0.265184	2.39948	0.0164182
T07C12.14	dyf-3	1344.85	1021.02	1397.39	674.609	804.885	820.669	847.841	801.467	484.829	484.593	525.458	375.236	501.631	429.266	695.026	471.074	953.241		743.123	-0.710202	0.611235	0.218832	-3.24541	0.0011728	0.0177911		743.123	-0.605084	0.657433	0.244811	-2.47164	0.0134496	0.189011		743.123	-0.194169	0.874076	0.222263	-0.873599	0.382337	0.973655		743.123	0.503854	1.418	0.221016	2.27972	0.0226246
Y51H1A.3	C04C3.6	4355.57	4173.29	4423.41	3086.04	3014.87	3014.61	3096.55	3315.21	2670.52	2425.05	2817.04	2367.31	2365.6	3248.45	2788.02	2747.63	3684.66		3152.58	-0.506808	0.703778	0.156217	-3.24424	0.00117763	0.0178093		3152.58	-0.429483	0.742528	0.174712	-2.45823	0.0139623	0.19242		3152.58	0.0125967	1.00877	0.156648	0.0804144	0.935908	0.994546		3152.58	0.22084	1.16541	0.156552	1.41065	0.158348
T28D9.2	pac-1	5000.8	4161.13	5134.06	3048.56	3022.3	2886.52	3335.45	3629.02	6821.25	6412.5	7723.74	6321.07	5525.07	8359.19	7525.49	6614.74	11751.5		5721.91	-0.674475	0.62656	0.208143	-3.24044	0.00119344	0.0179931		5721.91	-0.45258	0.730735	0.232692	-1.94498	0.0517776	0.294857		5721.91	-0.0526941	0.964134	0.207719	-0.25368	0.799743	0.987023		5721.91	0.305085	1.23549	0.20767	1.46908	0.14181
H21P03.2	C04E6.11	1832.24	1619.23	2093.09	1111.53	1258.76	1030.18	1317.51	1448.76	1051.78	701.824	850.22	658.326	795.66	760.177	1253.42	836.47	1613.73		1190.17	-0.705543	0.613212	0.217949	-3.23719	0.00120713	0.0181438		1190.17	-0.418245	0.748334	0.243556	-1.71724	0.0859345	0.3594		1190.17	-0.23401	0.850268	0.219643	-1.06541	0.28669	0.973655		1190.17	0.508018	1.4221	0.218862	2.32118	0.0202771
F21C3.5	C04E6.12	1997.55	1703.38	2118.01	1109.55	1076.36	1301.91	1211.78	1244.3	586.742	551.433	616.683	438.884	415.204	564.388	606.91	608.097	1189.07		1020.02	-0.738276	0.599455	0.228252	-3.23447	0.00121868	0.0182616		1020.02	-0.659454	0.633118	0.255323	-2.58282	0.00979969	0.178466		1020.02	-0.306851	0.808404	0.231901	-1.3232	0.185769	0.973655		1020.02	0.454621	1.37042	0.230722	1.97042	0.0487897
ZK809.3	grd-9	4510.21	3996.87	5322.44	3119.58	3224.84	3007.29	3250.06	3685.87	2596.31	2402.08	2702.7	2527.86	2208.78	3057.26	2774.16	2673.3	3868.08		3231.04	-0.564504	0.676188	0.174705	-3.23118	0.00123279	0.0184169		3231.04	-0.410691	0.752263	0.195335	-2.1025	0.0355095	0.254757		3231.04	0.017325	1.01208	0.175175	0.0989013	0.921217	0.994499		3231.04	0.274706	1.20975	0.175066	1.56915	0.116613
ZC477.5	C04E6.7	1641.34	1433.68	1783.12	1001.07	984.102	971.628	1087.76	1164.48	867.745	774.931	884.277	686.825	685.176	718.813	1089.07	680.639	1587.53		1061.3	-0.71639	0.608618	0.221923	-3.2281	0.00124616	0.0184484		1061.3	-0.524139	0.695374	0.248111	-2.11252	0.0346419	0.252639		1061.3	-0.273225	0.827468	0.223436	-1.22283	0.221393	0.973655		1061.3	0.409976	1.32866	0.222675	1.84114	0.0656008
F01G10.7	lim-7	2015.68	1974.1	2094.09	1587.9	1464.49	1666.95	1615.37	1701.34	391.821	362.4	352.738	293.539	315.413	352.053	355.433	323.304	366.84		1013.73	-0.36612	0.775866	0.113369	-3.22945	0.00124028	0.0184484		1013.73	-0.290389	0.817682	0.12687	-2.28887	0.0220871	0.215627		1013.73	-0.204933	0.867579	0.126845	-1.61561	0.106178	0.973655		1013.73	-0.0838025	0.943567	0.126285	-0.663596	0.506949
Y106G6E.6	fce-1	1923.96	2015.67	1770.16	2526.83	2926.85	2136.3	2953.21	2849.42	2227.25	2314.35	2362.13	2487.96	2389.65	2310.87	2469.22	2235.36	2249.83		2361.71	0.410323	1.32898	0.127105	3.22822	0.00124563	0.0184484		2361.71	0.608299	1.52446	0.141919	4.28623	1.81729e-05	0.0323704		2361.71	0.0584036	1.04131	0.126901	0.460228	0.645353	0.973655		2361.71	0.0105618	1.00735	0.126948	0.0831979	0.933694
F35H10.5	C04F12.5	559.911	500.876	634.905	295.881	285.262	325.706	322.261	365.198	96.9659	93.9943	124.066	65.5476	92.6636	115.819	145.54	115.53	297.267		261.023	-0.90271	0.534881	0.280152	-3.22221	0.00127205	0.0186944		261.023	-0.717783	0.608031	0.313297	-2.29106	0.0219599	0.215515		261.023	-0.197893	0.871823	0.298507	-0.662941	0.507368	0.973655		261.023	0.828851	1.77627	0.292551	2.83318	0.00460875
C06E2.5	C04F12.8	1679.73	1536.09	1812.02	1006.98	1007.43	1137.23	1100.97	1165.57	1178.43	740.466	960.906	740.023	752.892	1078.22	1330.65	900.056	1370.68		1146.96	-0.673719	0.626889	0.209022	-3.2232	0.00126765	0.0186944		1146.96	-0.564538	0.676172	0.233796	-2.41466	0.0157497	0.202923		1146.96	-0.163747	0.892704	0.210098	-0.779383	0.435754	0.973655		1146.96	0.32224	1.25027	0.209603	1.53738	0.1242
R119.5	sid-1	525.783	473.5	466.461	724.909	755.044	588.283	858.007	769.758	710.423	605.741	613.034	680.175	586.276	640.682	729.678	549.885	654.167		643.047	0.496306	1.4106	0.15405	3.22173	0.00127419	0.0186944		643.047	0.736713	1.66637	0.171483	4.29613	1.73809e-05	0.0323704		643.047	-0.0173974	0.988013	0.153142	-0.113603	0.909553	0.994499		643.047	0.00222067	1.00154	0.153132	0.0145017	0.98843
E02H1.5	C04F5.9	1153.95	1065.63	1246.89	729.841	696.719	832.563	729.916	829.895	300.792	240.208	254.214	172.894	174.635	262.891	262.367	255.24	371.357		563.529	-0.617413	0.651839	0.191715	-3.22047	0.00127979	0.0187207		563.529	-0.567324	0.674867	0.214618	-2.64342	0.00820736	0.168523		563.529	-0.382386	0.767168	0.202971	-1.88395	0.0595721	0.973655		563.529	0.160389	1.11759	0.200589	0.799591	0.423948
B0511.7	cht-1	3122.7	2826.81	3486.5	2043.55	1815.5	1857.25	2155.18	2167.13	1537.6	1185.37	1586.1	1133.31	1136.02	1409.13	2003.89	1373.82	2975.38		1989.13	-0.723091	0.605798	0.224662	-3.21858	0.00128827	0.0187333		1989.13	-0.541421	0.687094	0.251184	-2.15548	0.0311244	0.245441		1989.13	-0.228146	0.853731	0.225679	-1.01093	0.312049	0.973655		1989.13	0.560217	1.47449	0.2252	2.48764	0.0128592
ZK652.9	dhs-27	1028.1	1002.77	1192.07	681.513	681.872	722.774	725.85	809.121	86.0819	73.1067	96.0906	67.4476	61.4788	78.1319	62.3741	62.6904	117.461		444.055	-0.627488	0.647302	0.194947	-3.21876	0.00128745	0.0187333		444.055	-0.485413	0.714293	0.218036	-2.2263	0.0259941	0.229761		444.055	-0.29942	0.812579	0.233314	-1.28333	0.199375	0.973655		444.055	-0.0681035	0.953891	0.230532	-0.295419	0.767674
W10G11.20	C04F6.7	1615.74	1483.36	1762.19	947.806	956.53	1237.87	1096.91	1096.69	461.083	383.288	456.126	379.036	354.617	490.852	523.745	410.175	689.405		843.848	-0.629261	0.646507	0.195757	-3.21449	0.00130674	0.0188347		843.848	-0.563099	0.676847	0.219033	-2.57084	0.0101451	0.181163		843.848	-0.0867222	0.94166	0.201308	-0.430793	0.666619	0.974801		843.848	0.320118	1.24843	0.200382	1.59754	0.110146
K09A9.2	dis-3	3976.97	3637.94	4138.35	3180.72	3166.52	2856.33	3113.83	3608.24	1070.58	1056.91	1037.54	1019.31	1002.37	1140.73	1052.44	997.674	1049.92		2182.73	-0.352929	0.782993	0.109789	-3.2146	0.00130624	0.0188347		2182.73	-0.221261	0.857815	0.122757	-1.80243	0.0714776	0.335935		2182.73	-0.00139018	0.999037	0.113869	-0.0122086	0.990259	1		2182.73	-0.030206	0.97928	0.11395	-0.265081	0.790947
F30F8.10	pld-1	1217.94	1160.94	1418.32	975.422	1000.01	826.158	1030.83	1159.01	746.043	766.576	762.643	815.071	733.29	861.289	684.135	736.165	829.455		924.9	-0.439318	0.737483	0.136622	-3.21558	0.00130182	0.0188347		924.9	-0.209483	0.864847	0.152569	-1.37304	0.16974	0.486876		924.9	0.0827472	1.05903	0.138401	0.597879	0.549921	0.973655		924.9	-0.0158351	0.989084	0.138636	-0.11422	0.909063
C52E4.3	gcy-29	7525.2	6553.97	7722.52	4533.89	4257.72	4759.33	4826.8	5393.77	1415.9	1094.51	1593.4	1018.36	1079.89	1474.39	1786.08	1335.31	2435.06		3459.18	-0.68602	0.621566	0.213493	-3.21331	0.00131214	0.0188572		3459.18	-0.508019	0.703187	0.238694	-2.12832	0.0333103	0.249706		3459.18	-0.199673	0.870748	0.215442	-0.926806	0.354027	0.973655		3459.18	0.43748	1.35424	0.215006	2.03473	0.0418776
R12C12.5	mog-4	1763.99	1507.7	1912.69	1226.92	1133.63	1171.08	1179.25	1269.44	447.23	503.392	529.107	448.384	440.152	502.802	477.211	506.897	756.268		928.008	-0.553803	0.681222	0.172396	-3.2124	0.00131632	0.0188621		928.008	-0.49728	0.708441	0.192917	-2.57769	0.00994626	0.180323		928.008	-0.08813	0.940741	0.177838	-0.495562	0.620204	0.973655		928.008	0.235347	1.17719	0.177092	1.32895	0.183863
T19B10.7	nlp-41	1973.02	1827.08	2355.23	1343.3	1408.28	1268.97	1459.83	1553.73	908.313	792.685	993.747	777.072	754.674	807.976	1104.91	746.912	1382.42		1262.25	-0.614584	0.653118	0.191431	-3.21048	0.00132516	0.0189335		1262.25	-0.445488	0.734336	0.214034	-2.08139	0.0373981	0.259456		1262.25	-0.203481	0.868452	0.193502	-1.05157	0.292996	0.973655		1262.25	0.263554	1.20043	0.192933	1.36604	0.171926
C50F4.16	pph-1	811.604	787.815	937.906	543.435	568.404	548.027	633.34	642.923	349.275	335.246	374.632	333.438	365.309	378.71	399.986	356.44	648.746		530.308	-0.612417	0.6541	0.190939	-3.2074	0.0013394	0.0190265		530.308	-0.406533	0.754434	0.213389	-1.90512	0.056764	0.30774		530.308	0.0253883	1.01775	0.195662	0.129756	0.896759	0.993415		530.308	0.408784	1.32757	0.194636	2.10025	0.0357067
W03F9.2	C05A9.2	578.041	520.141	702.682	378.728	412.517	372.366	434.087	508.434	394.79	279.894	335.709	249.841	315.413	279.436	428.698	305.392	482.493		410.509	-0.630555	0.645928	0.196592	-3.20743	0.00133926	0.0190265		410.509	-0.349605	0.784799	0.219402	-1.59345	0.11106	0.401471		410.509	-0.258518	0.835946	0.200481	-1.28949	0.197228	0.973655		410.509	0.267127	1.20341	0.198789	1.34377	0.179022
Y62E10A.12	lip-1	1877.03	1684.12	2085.12	1175.64	1094.39	1245.18	1269.73	1292.41	1319.92	1050.65	1389.06	1015.51	972.077	1410.05	1610.84	1224.25	2257.96		1410.23	-0.683588	0.622615	0.213342	-3.20419	0.00135445	0.0190748		1410.23	-0.555018	0.680649	0.238591	-2.32623	0.0200062	0.21083		1410.23	-0.145884	0.903825	0.213812	-0.682301	0.495049	0.973655		1410.23	0.438142	1.35486	0.213382	2.05332	0.0400417
T14B4.2	C05B5.12	885.192	847.637	1024.62	655.87	530.227	677.944	562.178	640.736	106.86	127.414	120.417	105.446	98.9006	156.264	137.619	142.397	158.12		410.461	-0.564399	0.676237	0.176112	-3.20476	0.00135173	0.0190748		410.461	-0.612195	0.6542	0.197546	-3.099	0.00194178	0.104274		410.461	0.0248512	1.01737	0.201983	0.123036	0.902079	0.994499		410.461	0.306542	1.23674	0.19975	1.53463	0.124875
C24H10.2	pqn-8	693.223	576.92	660.82	437.904	452.814	474.835	480.85	488.753	107.85	108.616	75.4129	90.2467	83.7537	100.193	89.1059	113.738	88.5475		301.387	-0.499472	0.707366	0.15584	-3.20503	0.00135048	0.0190748		301.387	-0.408789	0.753255	0.174545	-2.34203	0.019179	0.207846		301.387	-0.0985869	0.933947	0.190575	-0.517313	0.604938	0.973655		301.387	-0.00875045	0.993953	0.189638	-0.0461428	0.963196
B0035.15	C05B5.4	777.476	679.326	842.222	525.682	512.2	548.942	542.862	600.28	121.702	133.681	128.932	86.4469	100.683	81.8087	137.619	132.546	202.394		362.047	-0.534683	0.69031	0.166932	-3.20299	0.00136007	0.0190993		362.047	-0.423323	0.745705	0.186826	-2.26586	0.0234597	0.22276		362.047	-0.513607	0.700469	0.196503	-2.61374	0.00895571	0.973655		362.047	0.299949	1.2311	0.188649	1.58999	0.111837
R09B3.5	C05B5.8	10798.3	9262.15	10261.1	6394.98	6108.22	6587.31	6513.33	7181.49	4262.54	2981.71	4022.43	2930.64	3038.3	4345.97	5436.45	3665.6	6232.66		5883.72	-0.667471	0.629609	0.208447	-3.20211	0.00136423	0.0191031		5883.72	-0.561759	0.677476	0.233069	-2.41027	0.0159405	0.203019		5883.72	-0.127305	0.91554	0.208945	-0.609275	0.542342	0.973655		5883.72	0.444735	1.36106	0.208803	2.12993	0.0331773
C26E6.12	C05C10.3	912.921	724.952	1049.54	502.012	565.222	569.07	642.489	669.165	131.597	108.616	145.96	96.8965	117.612	109.385	177.222	132.546	275.581		407.693	-0.715795	0.608869	0.223879	-3.19724	0.00138751	0.0193031		407.693	-0.449945	0.732071	0.250117	-1.79894	0.0720288	0.336317		407.693	-0.251287	0.840147	0.244579	-1.02743	0.30422	0.973655		407.693	0.602241	1.51807	0.239195	2.51779	0.0118094
F10B5.2	ufd-3	735.883	710.757	888.07	471.438	493.111	492.218	600.808	606.84	232.52	200.521	248.133	198.543	192.455	232.557	296.03	220.312	455.387		427.976	-0.68058	0.623915	0.212903	-3.19666	0.0013903	0.0193031		427.976	-0.366195	0.775826	0.237669	-1.54078	0.123371	0.421455		427.976	-0.126698	0.915925	0.222223	-0.570138	0.568584	0.973655		427.976	0.513599	1.42761	0.219779	2.33688	0.0194453
M01E11.2	gtl-1	2986.19	2572.31	3193.46	1752.6	1942.75	1837.13	2112.49	2084.03	606.531	481.46	620.332	429.384	429.46	490.852	757.4	488.09	999.321		1399.05	-0.661718	0.632125	0.206931	-3.19777	0.00138495	0.0193031		1399.05	-0.475448	0.719243	0.231352	-2.05509	0.0398707	0.266867		1399.05	-0.339636	0.790241	0.211999	-1.60206	0.109142	0.973655		1399.05	0.394241	1.31425	0.210682	1.87126	0.0613088
Y42H9AR.1	C05C8.1	1580.55	1621.26	1357.52	2198.4	2661.74	1806.94	2359.52	2543.26	2525.07	2440.72	2784.2	2794.8	2241.75	2013.05	2684.07	2291.78	2194.71		2241.14	0.548004	1.46206	0.171592	3.19365	0.00140485	0.0194503		2241.14	0.689761	1.61302	0.191703	3.59807	0.000320593	0.0769616		2241.14	-0.136594	0.909664	0.170967	-0.798949	0.42432	0.973655		2241.14	-0.112083	0.925251	0.170962	-0.655601	0.512081
F10D11.2	fkb-3	3043.78	2577.38	3182.5	1901.53	2049.86	1975.28	2098.25	2444.86	1288.26	907.567	1157.95	940.466	944.456	976.189	1638.56	1024.54	1412.24		1739.04	-0.570909	0.673192	0.179016	-3.18916	0.00142687	0.0196444		1739.04	-0.369538	0.77403	0.200119	-1.84659	0.0648063	0.325114		1739.04	-0.229251	0.853078	0.181104	-1.26585	0.205567	0.973655		1739.04	0.280791	1.21486	0.180567	1.55505	0.119934
Y54E10BL.5	C05C8.7	1737.32	1571.57	1893.75	1170.7	1004.25	1368.7	1181.28	1214.77	1696.9	1747.25	1856.13	1615.89	1568.15	2109.56	1741.52	1775.04	2387.17		1625.88	-0.553611	0.681313	0.173549	-3.18995	0.00142299	0.0196444		1625.88	-0.533669	0.690796	0.194264	-2.74714	0.00601172	0.151962		1625.88	-0.00168846	0.99883	0.172964	-0.00976196	0.992211	1		1625.88	0.155798	1.11404	0.172865	0.901269	0.367445
C32D5.9	C05C9.1	31357.1	29153.2	32971.2	22186.2	19864.4	24335.5	21233.6	23726.9	15516.5	12414.6	14480.5	11837.5	11963.4	14277.9	18449.9	13191.9	16722.8		19628.4	-0.493783	0.710161	0.155113	-3.18338	0.00145567	0.0199849		19628.4	-0.471068	0.72143	0.173434	-2.71612	0.00660517	0.15532		19628.4	-0.155469	0.89784	0.155273	-1.00127	0.316698	0.973655		19628.4	0.189466	1.14034	0.15524	1.22047	0.222285
C25F6.4	C05C9.2	434.064	460.319	352.836	611.488	634.152	570.9	627.24	631.989	1236.81	1332.63	1133.63	1572.19	1413.12	1222.53	1230.65	1133.8	847.526		908.581	0.542451	1.45644	0.170506	3.18142	0.00146557	0.0200091		908.581	0.599038	1.51471	0.190374	3.14664	0.00165159	0.0998339		908.581	0.184024	1.13605	0.165206	1.1139	0.265321	0.973655		908.581	-0.205818	0.867047	0.165652	-1.24247	0.214062
D2013.1	mapk-15	387.138	329.524	387.721	265.307	240.723	261.663	268.381	241.643	304.75	284.072	277.325	263.14	355.508	295.063	249.496	324.199	327.987		297.861	-0.523959	0.695461	0.164653	-3.18221	0.00146158	0.0200091		297.861	-0.528959	0.693055	0.185379	-2.85339	0.00432558	0.13637		297.861	0.0770408	1.05485	0.164914	0.467159	0.640386	0.973655		297.861	0.0584543	1.04135	0.165062	0.354135	0.723237
C42C1.11	wht-1	791.34	793.899	928.935	599.653	624.608	547.113	636.389	653.857	858.84	711.223	791.835	736.223	659.337	810.733	928.681	786.317	1134.85		764.343	-0.50579	0.704275	0.159174	-3.1776	0.001485	0.0202112		764.343	-0.377692	0.769668	0.178073	-2.121	0.033922	0.251503		764.343	-0.0985656	0.933961	0.158585	-0.62153	0.534251	0.973655		764.343	0.270819	1.20649	0.157988	1.71417	0.086497
ZK546.5	C05D10.4	1590.15	1370.82	1635.6	1031.64	1029.7	1075.93	1222.97	1260.7	487.798	422.974	412.338	357.187	378.673	413.639	627.701	371.665	575.559		839.12	-0.55097	0.682561	0.17343	-3.1769	0.0014886	0.0202112		839.12	-0.303145	0.810484	0.19377	-1.56445	0.117711	0.413178		839.12	-0.203626	0.868365	0.179795	-1.13254	0.257406	0.973655		839.12	0.249778	1.18902	0.178577	1.39871	0.1619
C01F6.9	C05D11.1	4391.83	3703.85	4272.9	2469.62	2244.98	2733.73	2323.94	2768.5	1176.45	1179.11	1516.77	1082.96	993.461	1565.4	1558.36	1295.9	2464.87		2220.16	-0.731609	0.602232	0.230528	-3.17363	0.00150545	0.0203146		2220.16	-0.695329	0.617569	0.257822	-2.69694	0.00699804	0.156976		2220.16	-0.088227	0.940678	0.231954	-0.380364	0.703675	0.974801		2220.16	0.458383	1.374	0.231605	1.97916	0.0477975
Y55D9A.2	let-756	1682.93	1427.6	1742.25	1037.56	1314.96	1008.22	1339.87	1344.89	54.4196	40.7309	35.2738	47.4983	57.9148	45.0407	64.3542	51.9435	51.5021		667.469	-0.530444	0.692342	0.167122	-3.17399	0.00150361	0.0203146		667.469	-0.269047	0.829868	0.186697	-1.44108	0.149561	0.461907		667.469	0.196312	1.14577	0.238051	0.824666	0.409561	0.973655		667.469	0.348993	1.27367	0.235594	1.48133	0.138518
F35D2.5	nas-4	453.261	436.999	378.751	563.161	568.404	544.368	451.369	403.467	2167.88	1996.86	2241.71	2266.62	2370.94	1972.6	2144.48	2145.8	2230.85		1372.8	0.401552	1.32093	0.126552	3.17302	0.00150861	0.0203146		1372.8	0.0161187	1.01124	0.143644	0.112213	0.910655	0.97283		1372.8	0.0453629	1.03194	0.117255	0.386874	0.69885	0.974801		1372.8	0.0257976	1.01804	0.117285	0.219956	0.825905
F53A2.5	atgl-1	607.903	538.391	681.751	384.646	353.131	354.983	380.207	395.813	435.357	322.714	424.502	308.739	329.669	394.336	579.188	329.573	729.161		444.121	-0.742355	0.597763	0.234076	-3.17143	0.00151689	0.0203703		444.121	-0.651289	0.636711	0.262063	-2.48524	0.0129465	0.186904		444.121	-0.195153	0.87348	0.235593	-0.828348	0.407473	0.973655		444.121	0.469972	1.38508	0.234161	2.00705	0.0447446
W04C9.3	C05D11.8	217.565	228.132	204.326	352.099	312.834	258.918	270.415	268.978	845.978	1099.73	901.306	1166.56	1043.36	1132.45	736.609	814.08	730.065		622.553	0.506185	1.42029	0.159848	3.16668	0.00154192	0.0205939		622.553	0.315976	1.24485	0.18002	1.75523	0.0792206	0.350703		622.553	0.231244	1.17385	0.146313	1.58048	0.113997	0.973655		622.553	-0.319893	0.801129	0.14725	-2.17244	0.0298225
F08F8.4	C05D12.1	1826.91	1504.66	1953.56	1002.05	1044.55	967.053	1173.15	1223.52	896.439	601.563	970.637	645.977	682.503	680.207	1272.23	623.322	1541.45		1094.69	-0.81048	0.570192	0.255911	-3.16703	0.00154004	0.0205939		1094.69	-0.55596	0.680204	0.286053	-1.94356	0.0519489	0.2954		1094.69	-0.297122	0.813874	0.257433	-1.15417	0.248429	0.973655		1094.69	0.477635	1.39246	0.256674	1.86086	0.0627634
B0041.5	daf-4	1576.28	1582.73	1706.37	1259.47	1293.75	1187.55	1300.23	1345.98	794.526	754.043	831.975	911.017	842.883	887.946	870.267	805.124	1044.5		1117.33	-0.379515	0.768696	0.11994	-3.1642	0.00155511	0.0207138		1117.33	-0.2938	0.81575	0.134223	-2.18891	0.0286037	0.239759		1117.33	0.150589	1.11002	0.122757	1.22672	0.219926	0.973655		1117.33	0.192834	1.14301	0.122701	1.57157	0.116049
F25H9.7	wdr-37	243.161	261.591	317.951	161.748	135.738	223.237	214.502	167.291	205.805	181.722	198.263	187.143	187.109	210.497	251.477	221.208	311.723		216.48	-0.657208	0.634104	0.207848	-3.16197	0.00156705	0.0208163		216.48	-0.522003	0.696404	0.232765	-2.24262	0.0249215	0.226487		216.48	-0.00259297	0.998204	0.209262	-0.012391	0.990114	1		216.48	0.421312	1.33915	0.207322	2.03217	0.0421366
R06C7.9	madf-11	916.12	813.163	1085.42	499.053	585.371	494.963	622.157	651.67	292.876	202.61	274.892	207.093	180.872	169.133	316.821	181.802	493.336		469.844	-0.833886	0.561016	0.263996	-3.1587	0.00158472	0.0209379		469.844	-0.558931	0.678805	0.295001	-1.89468	0.058135	0.310271		469.844	-0.467694	0.72312	0.272025	-1.7193	0.085559	0.973655		469.844	0.364863	1.28776	0.269278	1.35497	0.175427
ZK863.3	C05D2.8	1205.14	1226.84	1285.76	965.559	915.172	903.925	955.601	1032.18	742.086	662.138	727.37	704.875	614.788	637.924	811.853	599.142	654.167		861.442	-0.417027	0.748967	0.132017	-3.15889	0.00158371	0.0209379		861.442	-0.318544	0.801879	0.147732	-2.15623	0.0310656	0.245441		861.442	-0.123008	0.918271	0.134729	-0.913002	0.361242	0.973655		861.442	-0.0464862	0.968292	0.134577	-0.345424	0.729775
M88.7	C05D9.3	1146.48	1034.2	1308.68	727.868	693.537	843.541	752.281	776.318	481.861	473.105	504.78	476.883	424.114	600.237	549.486	505.106	847.526		714.471	-0.623206	0.649227	0.19741	-3.15691	0.0015945	0.0210106		714.471	-0.605874	0.657073	0.221051	-2.74089	0.00612738	0.151962		714.471	0.0405708	1.02852	0.200678	0.202168	0.839785	0.991268		714.471	0.382388	1.3035	0.200033	1.91162	0.0559245
F47G9.1	ife-4	6139.82	5795.56	6580.29	4678.87	4839.91	4550.73	4966.07	5346.76	2496.38	2599.46	2821.9	2596.26	2487.66	2872.5	3127.62	2748.53	3624.12		4016.03	-0.396225	0.759844	0.125593	-3.15484	0.00160587	0.0210556		4016.03	-0.259389	0.835442	0.140422	-1.84721	0.0647174	0.325114		4016.03	0.00724543	1.00503	0.12664	0.0572129	0.954376	0.997095		4016.03	0.263112	1.20006	0.126494	2.08005	0.0375213
Y71H2AM.3	C05D9.7	811.604	678.312	800.36	544.422	557.799	531.559	634.356	658.231	1033.97	895.035	954.825	728.624	719.925	839.228	936.602	821.245	1188.16		784.368	-0.487393	0.713313	0.154496	-3.15473	0.00160648	0.0210556		784.368	-0.240298	0.846571	0.172425	-1.39364	0.163427	0.479585		784.368	-0.334208	0.79322	0.152637	-2.18956	0.028556	0.973655		784.368	0.0306948	1.0215	0.152045	0.201879	0.840011
T06G6.9	C05D9.9	1618.94	1438.75	1731.29	1072.08	1077.42	1023.78	1240.25	1300.06	1043.87	1038.11	1095.92	843.57	851.793	1257.46	1239.56	1206.34	1828.78		1229.88	-0.593819	0.662586	0.18859	-3.14874	0.00163977	0.0210765		1229.88	-0.329802	0.795646	0.210716	-1.56515	0.117548	0.413178		1229.88	-0.105849	0.929258	0.18929	-0.559188	0.576033	0.973655		1229.88	0.427993	1.34536	0.188772	2.26725	0.023375
K05C4.7	lnp-1	3891.65	3391.56	4287.85	2442.99	2706.28	2375.09	2705.16	3005.77	1344.66	985.896	1190.79	900.567	972.077	1099.36	1739.54	1109.62	1971.54		2124.73	-0.620952	0.650242	0.197056	-3.15114	0.00162634	0.0210765		2124.73	-0.433802	0.740308	0.220309	-1.96906	0.0489458	0.287206		2124.73	-0.244732	0.843973	0.199143	-1.22892	0.2191	0.973655		2124.73	0.452934	1.36882	0.198533	2.28141	0.0225243
B0035.4	C05E11.3	1784.25	1493.5	1799.06	958.655	1032.88	1180.23	1061.33	1093.41	661.94	548.3	678.716	460.733	565.783	728.005	766.31	668.101	1184.55		980.338	-0.678488	0.62482	0.215307	-3.15126	0.00162566	0.0210765		980.338	-0.65146	0.636636	0.240937	-2.70387	0.00685381	0.15697		980.338	-0.106144	0.929068	0.218114	-0.486644	0.62651	0.973655		980.338	0.47178	1.38682	0.217304	2.17106	0.0299265
Y51H7C.7	C05E11.7	1253.13	1177.16	1424.3	796.907	738.076	812.435	826.493	826.615	192.942	148.302	184.883	155.794	143.45	185.678	261.377	135.232	313.53		563.312	-0.715423	0.609027	0.227243	-3.14827	0.00164238	0.0210765		563.312	-0.636468	0.643286	0.254254	-2.50328	0.0123049	0.185416		563.312	-0.117572	0.921738	0.241746	-0.486344	0.626723	0.973655		563.312	0.432294	1.34938	0.239202	1.80723	0.0707258
T19B10.11	flp-12	964.113	671.215	1007.68	502.998	408.275	544.368	497.116	547.796	1225.93	886.679	1302.7	932.866	883.868	945.856	1486.09	901.847	2342.89		944.252	-0.860124	0.550905	0.273178	-3.14859	0.00164061	0.0210765		944.252	-0.753904	0.592997	0.305644	-2.4666	0.0136401	0.189851		944.252	-0.305843	0.808969	0.271589	-1.12612	0.260113	0.973655		944.252	0.470252	1.38535	0.271066	1.73483	0.0827715
C30C11.1	srp-1	744.415	691.493	862.156	467.492	502.655	649.582	496.099	562.011	481.861	452.217	509.645	437.934	425.005	534.974	542.556	558.841	580.076		558.765	-0.503853	0.705221	0.159823	-3.15257	0.00161839	0.0210765		558.765	-0.534439	0.690427	0.179411	-2.97886	0.00289325	0.120716		558.765	-0.046032	0.968597	0.162105	-0.283964	0.776438	0.980517		558.765	0.220581	1.1652	0.161427	1.36644	0.1718
T10F2.2	sri-4	533.248	607.338	657.83	428.042	426.303	395.239	425.954	415.494	14.8417	25.0651	14.596	18.0493	14.2559	22.0608	18.8112	15.2248	11.7461		237.888	-0.525891	0.69453	0.166805	-3.15273	0.00161752	0.0210765		237.888	-0.511042	0.701715	0.187182	-2.73018	0.00632989	0.153252		237.888	-0.0129588	0.991058	0.318097	-0.0407386	0.967504	1		237.888	-0.266398	0.831393	0.329171	-0.809299	0.418343
B0035.12	icl-1	1362.98	1273.48	1560.85	1016.85	1147.41	965.224	1219.92	1257.42	546.175	510.702	543.703	568.079	521.233	504.64	554.437	501.524	430.991		852.095	-0.424078	0.745315	0.134667	-3.14909	0.00163781	0.0210765		852.095	-0.175858	0.885241	0.150358	-1.16959	0.242164	0.56609		852.095	-0.00603751	0.995824	0.139924	-0.0431484	0.965583	0.999826		852.095	-0.106813	0.928637	0.140282	-0.761414	0.44641
ZK20.4	C05E7.1	413.801	345.746	453.504	231.774	250.267	275.386	278.547	283.192	18.7995	12.5326	20.6777	12.3496	20.4929	21.1416	23.7616	25.0762	47.8879		160.879	-0.679095	0.624557	0.216019	-3.14369	0.00166835	0.0212985		160.879	-0.525784	0.694582	0.241682	-2.17552	0.0295912	0.241858		160.879	0.0660165	1.04682	0.34772	0.189855	0.849423	0.991268		160.879	0.908133	1.87661	0.324768	2.79625	0.00516998
Y45F10D.4	C05E7.2	1342.72	1160.94	1424.3	874.822	772.011	1006.39	879.356	898.78	631.267	590.075	615.467	494.932	546.181	733.521	654.433	661.832	895.414		834.261	-0.565588	0.67568	0.179879	-3.14426	0.00166507	0.0212985		834.261	-0.558483	0.679016	0.201438	-2.77249	0.005563	0.150138		834.261	-0.049611	0.966197	0.182606	-0.271683	0.785866	0.982743		834.261	0.268158	1.20427	0.182046	1.47303	0.140744
ZC395.6	frpr-2	540.714	525.21	625.935	379.714	392.368	404.388	441.203	451.577	0	0	0	0	0	0	0	0	0		221.242	-0.524188	0.69535	0.166821	-3.14221	0.00167677	0.0213506		221.242	-0.337518	0.791402	0.18641	-1.81062	0.0701996	0.334039		221.242	0	1	1.67331	0	1	1		221.242	0	1	1.67331	0	1
T16G1.11	C05G5.2	3347.73	2958.62	3479.52	2219.11	2219.53	2170.15	2301.57	2408.77	1594	1472.58	1539.88	1275.8	1174.33	1751.07	1696.97	1406.95	2229.05		2073.27	-0.566327	0.675334	0.180353	-3.1401	0.00168888	0.0214493		2073.27	-0.469925	0.722002	0.201698	-2.32985	0.0198142	0.210636		2073.27	-0.132901	0.911996	0.181503	-0.732224	0.464032	0.973655		2073.27	0.211286	1.15772	0.181247	1.16574	0.243721
DY3.1	C05G5.3	818.003	719.883	938.903	529.628	510.079	563.581	557.095	547.796	719.328	636.028	677.5	558.58	580.93	778.561	741.559	746.912	1199.01		695.492	-0.627271	0.6474	0.199891	-3.13807	0.00170064	0.0214787		695.492	-0.579633	0.669134	0.223865	-2.5892	0.00961985	0.177568		695.492	-0.0839025	0.943502	0.199801	-0.419931	0.674536	0.974801		695.492	0.402916	1.32218	0.199103	2.02366	0.0430051
R53.4	C05G5.5	16282.2	14825.5	18605.6	11200.1	10908.9	10391.5	11419.4	12225.4	5328.17	5652.19	6430.77	5102.27	4633.18	6811.26	5628.52	5887.53	9084.25		9436.28	-0.613182	0.653753	0.195415	-3.13784	0.00170198	0.0214787		9436.28	-0.487157	0.71343	0.218488	-2.22967	0.0257692	0.229761		9436.28	-0.073404	0.950393	0.195771	-0.374948	0.707699	0.974801		9436.28	0.24276	1.18325	0.195715	1.24038	0.214836
Y55B1BM.1	nhr-76	963.046	916.583	1046.55	726.882	722.17	732.838	789.895	896.593	774.737	634.984	636.144	643.127	682.503	591.045	779.181	630.487	718.319		757.946	-0.423459	0.745635	0.13497	-3.13744	0.00170431	0.0214787		757.946	-0.210421	0.864285	0.150712	-1.39618	0.162661	0.478513		757.946	-0.0949997	0.936272	0.136548	-0.695724	0.486602	0.973655		757.946	0.0553059	1.03908	0.13622	0.406005	0.684739
C36B1.7	ckk-1	2134.06	1785.51	2367.19	1156.9	1274.67	1195.78	1310.39	1348.17	541.228	385.377	554.65	351.487	418.768	524.863	667.304	478.239	1113.17		1035.75	-0.793452	0.576962	0.253115	-3.13476	0.00171998	0.0216207		1035.75	-0.656727	0.634316	0.283049	-2.32019	0.0203307	0.211824		1035.75	-0.193299	0.874604	0.257219	-0.751496	0.452354	0.973655		1035.75	0.609098	1.5253	0.256007	2.37922	0.0173493
B0001.2	txt-13	856.397	836.483	945.88	579.927	737.016	584.624	729.916	798.186	1554.42	1342.03	1423.11	1464.85	1380.15	1372.36	1764.3	1311.13	1386.04		1121.58	-0.473563	0.720184	0.151122	-3.13365	0.00172645	0.0216467		1121.58	-0.203443	0.868476	0.168615	-1.20655	0.227604	0.549345		1121.58	-0.0347186	0.976222	0.148067	-0.234479	0.814613	0.988417		1121.58	0.0461446	1.0325	0.147999	0.311791	0.7552
F35H10.6	rpb-6	762.545	709.744	845.212	434.946	440.089	516.006	456.452	520.461	271.109	232.897	301.652	215.642	231.659	254.618	350.483	308.079	664.106		442.1	-0.736137	0.600345	0.235284	-3.12871	0.00175573	0.0217871		442.1	-0.661525	0.632209	0.263382	-2.51165	0.0120167	0.185416		442.1	-0.197887	0.871827	0.241841	-0.818251	0.413214	0.973655		442.1	0.716497	1.64319	0.239211	2.99525	0.00274219
F58A4.6	C06A12.3	608.969	520.141	674.774	369.852	338.285	353.153	370.041	447.203	314.644	196.344	263.945	201.393	217.403	238.992	309.89	283.003	573.751		369.517	-0.765219	0.588364	0.244458	-3.13027	0.00174648	0.0217871		369.517	-0.557627	0.679419	0.273261	-2.04064	0.0412868	0.269385		369.517	-0.236687	0.848692	0.249917	-0.947062	0.343607	0.973655		369.517	0.590314	1.50557	0.247398	2.38609	0.0170287
R06F6.12	lact-6	1063.3	932.806	1224.96	732.799	843.061	677.944	910.87	932.675	904.355	727.934	789.403	663.076	743.091	709.621	1084.12	763.032	972.215		863.251	-0.515761	0.699424	0.164789	-3.12984	0.00174904	0.0217871		863.251	-0.220195	0.85845	0.183929	-1.19718	0.231238	0.554365		863.251	-0.195018	0.873562	0.165578	-1.1778	0.238876	0.973655		863.251	0.218654	1.16365	0.164917	1.32584	0.184893
Y34D9A.6	ints-1	1361.92	1182.23	1432.27	727.868	821.852	943.266	848.858	858.324	529.354	477.282	583.842	399.936	441.934	591.045	528.695	486.299	863.79		769.339	-0.673415	0.627021	0.215189	-3.12941	0.00175155	0.0217871		769.339	-0.634901	0.643985	0.240842	-2.63618	0.00838458	0.169236		769.339	-0.149965	0.901272	0.218401	-0.686648	0.492305	0.973655		769.339	0.241061	1.18186	0.217698	1.10732	0.268157
F08G12.4	sir-2.4	537.514	541.433	584.073	405.357	344.648	427.26	389.356	442.829	505.608	486.682	515.727	438.884	465.991	526.701	452.46	447.789	618.025		478.255	-0.497477	0.708345	0.159038	-3.12803	0.00175982	0.0217871		478.255	-0.414448	0.750306	0.178201	-2.32574	0.0200325	0.21083		478.255	-0.0747315	0.949519	0.158423	-0.47172	0.637127	0.973655		478.255	0.0104315	1.00726	0.158223	0.0659293	0.947434
C26B2.6	C06A5.2	579.108	570.837	642.879	406.344	391.308	433.664	468.651	475.632	284.961	247.518	262.729	234.642	198.692	274.84	279.198	243.597	377.682		374.84	-0.541744	0.68694	0.173292	-3.12618	0.00177092	0.0218417		374.84	-0.340131	0.78997	0.1936	-1.75688	0.0789388	0.350703		374.84	-0.168039	0.890052	0.180852	-0.929151	0.352811	0.973655		374.84	0.179239	1.13229	0.179307	0.99962	0.317494
Y94H6A.8	C06A5.3	2804.89	2452.67	3045.95	1844.33	1918.36	1887.45	1921.37	2019.52	289.908	287.205	270.027	269.79	242.351	400.771	251.477	332.259	341.54		1210.58	-0.555457	0.680441	0.1777	-3.12582	0.00177311	0.0218417		1210.58	-0.490276	0.711889	0.198771	-2.46654	0.0136426	0.189851		1210.58	0.107152	1.0771	0.188976	0.567017	0.570703	0.973655		1210.58	0.12772	1.09257	0.188954	0.675933	0.499083
D1007.4	unc-94	551.379	440.041	614.971	301.799	287.383	313.812	320.228	325.835	220.647	174.412	240.835	144.395	172.853	173.729	309.89	206.878	545.742		314.402	-0.830855	0.562196	0.266166	-3.12156	0.00179893	0.0221044		314.402	-0.729161	0.603255	0.297958	-2.4472	0.0143973	0.19465		314.402	-0.371959	0.772732	0.273287	-1.36106	0.173495	0.973655		314.402	0.741707	1.67215	0.269458	2.75259	0.0059125
C28H8.12	C06A6.2	2400.68	2215.41	2423.01	1586.91	1472.97	1688.91	1548.28	1687.13	1021.11	813.573	1075.24	812.221	794.769	896.219	1187.09	917.072	1599.28		1419.99	-0.5677	0.674692	0.182184	-3.11608	0.0018327	0.0224073		1419.99	-0.53654	0.689422	0.20384	-2.63216	0.00848432	0.169966		1419.99	-0.216899	0.860413	0.184377	-1.17639	0.23944	0.973655		1419.99	0.34822	1.27299	0.183718	1.89541	0.0580385
C25A1.13	mvb-12	1115.56	1025.07	1170.14	701.239	691.416	858.18	798.028	816.774	404.684	391.643	437.881	342.938	384.019	503.721	441.569	443.311	624.35		655.913	-0.556269	0.680059	0.178512	-3.11615	0.00183231	0.0224073		655.913	-0.450889	0.731592	0.199728	-2.25752	0.0239757	0.224548		655.913	-0.00340827	0.99764	0.183552	-0.0185684	0.985185	1		655.913	0.291181	1.22364	0.182803	1.59287	0.11119
C49H3.8	erp-44.2	1428.04	1287.68	1395.4	998.106	957.59	971.628	1029.81	1081.38	1006.27	854.304	879.412	842.62	852.684	879.673	1248.47	930.505	1492.66		1066.84	-0.489879	0.712085	0.15733	-3.1137	0.00184757	0.0224773		1066.84	-0.376543	0.770281	0.175995	-2.13952	0.0323938	0.247192		1066.84	-0.089944	0.939559	0.158423	-0.567747	0.570207	0.973655		1066.84	0.421827	1.33962	0.157738	2.67423	0.00749008
C53C11.3	snpc-1.1	382.872	330.538	313.964	552.312	524.925	495.878	489.999	412.214	558.048	796.863	628.846	870.169	873.176	859.451	483.152	662.728	385.814		565.938	0.614903	1.53146	0.197463	3.11402	0.00184555	0.0224773		565.938	0.398293	1.31795	0.221405	1.79893	0.0720291	0.336317		565.938	0.391835	1.31206	0.193595	2.02399	0.0429708	0.973655		565.938	-0.372861	0.77225	0.194952	-1.91258	0.0558024
T22B7.3	spdl-1	778.542	634.714	806.34	515.82	468.721	522.41	512.365	562.011	213.721	134.725	225.022	189.993	216.512	188.436	286.129	234.641	242.15		396.015	-0.558313	0.679096	0.17946	-3.11107	0.0018641	0.0225111		396.015	-0.462005	0.725976	0.200891	-2.29978	0.0214608	0.213687		396.015	0.0555491	1.03925	0.192433	0.288668	0.772836	0.979448		396.015	0.413119	1.33156	0.190657	2.16682	0.0302484
Y71H2AM.24	glr-4	678.292	559.683	662.813	404.371	442.21	443.728	462.551	472.351	550.133	476.238	558.299	521.531	504.304	543.246	635.622	483.612	831.262		542.956	-0.558776	0.678878	0.179541	-3.11224	0.00185675	0.0225111		542.956	-0.438704	0.737797	0.200927	-2.1834	0.0290067	0.239759		542.956	-0.0140089	0.990337	0.17934	-0.0781137	0.937738	0.994741		542.956	0.299945	1.2311	0.178702	1.67847	0.0932562
R07A4.2	C06B3.7	54.3913	55.7656	63.7896	102.572	91.1991	118.938	74.2115	54.6703	196.9	316.447	278.541	265.04	322.541	370.437	191.083	353.753	242.15		185.437	0.847267	1.79909	0.272295	3.11158	0.00186091	0.0225111		185.437	0.153966	1.11262	0.313721	0.490772	0.623588	0.852304		185.437	0.275925	1.21077	0.245293	1.12488	0.260639	0.973655		185.437	-0.00687759	0.995244	0.246225	-0.0279322	0.977716
C49H3.9	C06B8.7	3346.67	3200.94	3594.14	2525.84	2681.89	2282.69	2706.18	2968.6	1690.97	1268.92	1301.48	1162.76	1174.33	1297.91	1514.8	1288.74	1523.38		2090.01	-0.437362	0.738484	0.140669	-3.10915	0.00187628	0.0226027		2090.01	-0.252788	0.839273	0.157246	-1.6076	0.107923	0.396036		2090.01	-0.229925	0.852679	0.142684	-1.61143	0.107085	0.973655		2090.01	0.0213291	1.01489	0.142404	0.149778	0.88094
Y95B8A.1	rpl-38	23.4629	35.4872	33.8882	42.4097	67.8691	53.9793	23.3817	25.1483	829.157	970.23	869.681	1072.51	1004.15	927.472	707.897	1021.85	728.258		496.285	0.815521	1.75993	0.262569	3.10593	0.00189684	0.0227945		496.285	-0.355947	0.781357	0.331724	-1.07302	0.283262	0.607325		496.285	0.170572	1.1255	0.187024	0.91203	0.361753	0.973655		496.285	-0.118529	0.921126	0.187424	-0.632414	0.527116
T20G5.11	C06E1.1	2835.81	2393.86	3559.26	1606.64	1864.28	1592.85	2074.87	2219.61	1505.94	1031.85	1526.5	924.317	1082.56	1171.06	1814.79	1209.03	2846.17		1838.79	-0.795569	0.576116	0.256236	-3.10482	0.00190393	0.0228239		1838.79	-0.448277	0.732918	0.286382	-1.56531	0.11751	0.413178		1838.79	-0.354754	0.782003	0.257227	-1.37915	0.16785	0.973655		1838.79	0.530487	1.44442	0.256696	2.0666	0.0387721
K08D10.4	rha-2	3121.64	2886.63	3234.33	2200.37	1917.3	2164.66	2098.25	2314.74	2044.2	1579.1	1791.66	1421.15	1491.53	1951.46	2450.41	1732.94	2652.81		2179.6	-0.556913	0.679755	0.179493	-3.10271	0.0019176	0.0228957		2179.6	-0.481631	0.716168	0.200756	-2.39908	0.0164361	0.203665		2179.6	-0.154847	0.898228	0.180193	-0.85934	0.390153	0.973655		2179.6	0.33606	1.2623	0.179886	1.86819	0.0617361
R03C1.3	doxa-1	164.24	183.519	139.54	219.938	221.635	233.301	211.452	195.72	301.781	360.311	349.089	401.835	384.91	391.579	340.582	337.633	309.916		279.234	0.470837	1.38591	0.151763	3.10245	0.00191924	0.0228957		279.234	0.326943	1.25435	0.171121	1.9106	0.0560564	0.306522		279.234	0.221758	1.16615	0.139511	1.58954	0.111939	0.973655		279.234	-0.0323719	0.977811	0.140699	-0.23008	0.81803
W01G7.3	glr-1	3310.41	2788.28	3287.16	1819.67	1800.65	1870.98	1912.22	2029.36	1023.09	713.312	986.449	663.076	645.972	921.956	1251.44	846.321	1999.55		1639.4	-0.773314	0.585072	0.249327	-3.1016	0.00192475	0.0229032		1639.4	-0.66676	0.62992	0.278815	-2.39141	0.0167838	0.204649		1639.4	-0.287338	0.819413	0.251493	-1.14253	0.253235	0.973655		1639.4	0.589684	1.50492	0.250724	2.35192	0.0186768
C50F4.6	C06E2.1	3447.98	2859.25	3435.67	1641.16	1926.85	2077.75	1943.73	2183.53	4265.51	2514.87	3481.16	2083.27	2649.82	4043.56	5783.96	3418.42	5081.54		3108.12	-0.787149	0.579488	0.253843	-3.10092	0.00192918	0.0229032		3108.12	-0.654229	0.635415	0.283845	-2.30488	0.0211731	0.213325		3108.12	-0.225514	0.85529	0.253557	-0.889399	0.373789	0.973655		3108.12	0.477068	1.39191	0.253394	1.88271	0.0597394
T09A5.5	C06E2.5	640.964	578.948	701.685	454.671	363.736	446.473	459.502	470.165	1166.56	1033.94	1162.82	912.917	987.224	1154.51	1462.33	1145.44	2003.16		890.885	-0.602758	0.658494	0.194478	-3.09937	0.00193931	0.022968		890.885	-0.462654	0.72565	0.217559	-2.12657	0.0334561	0.249868		890.885	-0.138765	0.908297	0.190747	-0.72748	0.466932	0.973655		890.885	0.455268	1.37104	0.190203	2.39359	0.0166844
T21C9.4	ubc-22	3764.73	3105.63	4150.31	2178.67	2150.6	2264.39	2244.64	2539.98	476.914	401.042	582.625	382.836	402.73	513.832	708.887	510.479	1135.76		1618.47	-0.741044	0.598306	0.239418	-3.09519	0.00196689	0.0231513		1618.47	-0.618809	0.651208	0.267717	-2.31143	0.0208091	0.21279		1618.47	-0.167861	0.890162	0.244609	-0.686242	0.49256	0.973655		1618.47	0.690138	1.61344	0.243272	2.83689	0.00455549
F23C8.9	glb-2	1541.09	1354.6	1558.86	789.017	997.888	813.35	1025.75	1097.78	531.333	362.4	524.241	301.139	410.749	420.074	670.274	427.191	997.514		813.132	-0.776806	0.583657	0.250997	-3.09488	0.00196892	0.0231513		813.132	-0.483884	0.71505	0.280492	-1.72512	0.0845053	0.357002		813.132	-0.324512	0.798568	0.254973	-1.27273	0.203114	0.973655		813.132	0.563367	1.47771	0.253463	2.22268	0.0262376
T02C12.2	C06E7.2	1449.37	1332.29	1585.77	1053.34	1033.94	898.436	1105.04	1225.71	34.6307	31.3314	42.5718	22.7992	16.0379	38.6063	31.6821	33.1364	43.3702		586.945	-0.548942	0.683521	0.177304	-3.09604	0.00196121	0.0231513		586.945	-0.321162	0.800425	0.19813	-1.62096	0.105025	0.392194		586.945	-0.481213	0.716375	0.275349	-1.74765	0.0805255	0.973655		586.945	0.00621067	1.00431	0.262473	0.0236621	0.981122
Y57A10A.29	prk-1	663.361	537.377	732.583	413.248	458.116	416.281	467.634	467.978	166.227	150.391	188.532	164.344	158.597	164.537	200.983	214.043	331.601		346.814	-0.586674	0.665876	0.189656	-3.09337	0.00197898	0.0231655		346.814	-0.462162	0.725898	0.212221	-2.17774	0.0294254	0.241666		346.814	-0.0495098	0.966265	0.204108	-0.242567	0.808341	0.988		346.814	0.56672	1.48115	0.200801	2.8223	0.00476813
Y64G10A.7	C06E8.5	642.031	680.34	559.155	1030.65	895.024	882.882	993.215	899.873	1720.65	2256.91	1856.13	2574.41	2291.64	1973.52	1993.99	1981.02	1306.53		1443.41	0.578004	1.49278	0.186858	3.09328	0.00197956	0.0231655		1443.41	0.59401	1.50944	0.208822	2.84458	0.00444698	0.137026		1443.41	0.229449	1.17239	0.183619	1.24959	0.211448	0.973655		1443.41	-0.143583	0.905268	0.183855	-0.780957	0.434828
F57C9.7	C06G1.1	405.269	344.733	428.586	201.199	222.695	221.407	273.464	277.725	109.829	67.8848	92.4416	46.5483	79.2987	65.2631	108.907	79.7064	207.815		190.163	-0.869031	0.547514	0.28132	-3.08912	0.00200749	0.0234366		190.163	-0.511501	0.701492	0.313812	-1.62996	0.10311	0.389944		190.163	-0.498337	0.707922	0.304112	-1.63866	0.101284	0.973655		190.163	0.553355	1.46749	0.295559	1.87223	0.0611743
F25H9.5	cpg-19	704.954	669.187	800.36	558.229	548.255	548.942	618.091	552.17	623.352	613.052	617.899	591.829	662.901	525.782	680.175	665.414	627.061		623.98	-0.39366	0.761196	0.127493	-3.08771	0.00201706	0.0234925		623.98	-0.308631	0.807408	0.142819	-2.16099	0.0306963	0.245186		623.98	-0.0583838	0.960339	0.127758	-0.456987	0.647681	0.973655		623.98	0.0890412	1.06366	0.127388	0.698976	0.484567
C27H6.9	ain-1	699.622	537.377	790.393	369.852	386.005	371.451	412.738	453.764	104.881	78.3286	97.307	69.3475	66.8247	87.3239	136.629	93.1401	261.125		295.065	-0.846824	0.556008	0.274477	-3.08522	0.002034	0.0235781		295.065	-0.641513	0.64104	0.306863	-2.09055	0.0365686	0.257972		295.065	-0.327915	0.796687	0.298424	-1.09882	0.271845	0.973655		295.065	0.807873	1.75063	0.290567	2.78033	0.00543029
ZK546.14	tin-9.1	2575.59	2133.29	2522.68	1455.74	1612.95	1773.08	1762.78	1683.85	1028.04	711.223	717.639	769.472	771.603	587.368	1017.79	763.032	729.161		1330.31	-0.578666	0.669583	0.187546	-3.08546	0.00203236	0.0235781		1330.31	-0.484108	0.714939	0.209761	-2.3079	0.0210045	0.213325		1330.31	-0.207835	0.865836	0.190448	-1.09129	0.275144	0.973655		1330.31	0.0296162	1.02074	0.19011	0.155784	0.876203
R10H10.1	npr-17	1013.17	984.516	1250.87	713.074	712.625	834.392	705.518	799.28	293.866	289.294	300.435	268.84	303.83	315.285	368.304	375.247	541.224		592.34	-0.523194	0.69583	0.169907	-3.07929	0.00207492	0.0238825		592.34	-0.525617	0.694662	0.19038	-2.76088	0.00576466	0.151962		592.34	0.00760257	1.00528	0.178908	0.0424944	0.966105	1		592.34	0.540875	1.45485	0.17708	3.05442	0.00225498
ZC168.3	swt-3	2928.6	2670.66	3069.87	1804.88	1978.81	1647.74	1927.47	2210.87	1071.57	713.312	936.58	600.378	650.427	780.4	1333.62	772.884	1484.53		1563.68	-0.674661	0.626479	0.219103	-3.07919	0.00207564	0.0238825		1563.68	-0.48193	0.716019	0.244957	-1.96741	0.0491364	0.287206		1563.68	-0.422066	0.746355	0.221704	-1.90373	0.056945	0.973655		1563.68	0.399801	1.31933	0.220792	1.81076	0.0701776
R13A5.12	pept-2	6156.88	5530.93	6129.78	4468.79	4986.26	4333.9	5197.86	5274.59	4322.9	3573.87	3572.38	3514.87	3380.44	3403.79	3823.63	3230.35	3356.67		4368.11	-0.369883	0.773845	0.120146	-3.07861	0.00207969	0.0238825		4368.11	-0.181738	0.88164	0.134303	-1.35319	0.175994	0.495577		4368.11	-0.155476	0.897836	0.120618	-1.28899	0.1974	0.973655		4368.11	-0.140043	0.907492	0.120618	-1.16104	0.245624
Y47D3A.21	zipt-2.1	1268.06	1116.33	1363.5	840.303	906.689	880.138	932.219	964.384	39.5779	43.864	52.3025	27.549	42.7678	56.0711	47.5231	42.0922	56.0198		510.552	-0.512669	0.700924	0.16645	-3.08002	0.00206988	0.0238825		510.552	-0.397763	0.759034	0.186198	-2.13623	0.0326603	0.247558		510.552	-0.0918026	0.93835	0.241043	-0.380855	0.703311	0.974801		510.552	0.109835	1.0791	0.237191	0.463065	0.643318
T24H7.1	C06H2.2	5730.29	5441.71	6586.27	4501.34	4326.65	4378.73	4444.56	4649.16	3544.2	3866.3	3415.47	3090.24	3261.94	3827.54	2898.91	3319.91	3883.44		4186.27	-0.427232	0.743687	0.138815	-3.0777	0.00208607	0.0238998		4186.27	-0.380626	0.768104	0.155255	-2.45162	0.0142215	0.193124		4186.27	-0.0888603	0.940265	0.139249	-0.63814	0.523383	0.973655		4186.27	-0.0997755	0.933178	0.139261	-0.716462	0.473706
R12C12.2	jmjd-5	2200.18	1880.82	2268.52	1365	1482.52	1525.14	1601.14	1702.43	1125.99	1070.49	1334.32	982.264	1038.9	1095.68	1329.66	1215.3	1963.4		1481.28	-0.538097	0.688679	0.175114	-3.07283	0.00212038	0.0241802		1481.28	-0.357695	0.78041	0.195767	-1.82715	0.0676772	0.329147		1481.28	-0.179412	0.883063	0.176386	-1.01715	0.30908	0.973655		1481.28	0.353189	1.27738	0.17586	2.00835	0.0446058
F42F12.4	lmtr-3	237.829	230.16	255.158	149.913	139.98	177.491	142.323	180.412	173.153	127.414	110.687	92.1467	98.9006	121.334	170.291	126.276	163.542		158.648	-0.628063	0.647044	0.204367	-3.07321	0.00211772	0.0241802		158.648	-0.580385	0.668785	0.229767	-2.52597	0.011538	0.185416		158.648	-0.401488	0.757077	0.214495	-1.87178	0.061237	0.973655		158.648	0.155786	1.11403	0.20997	0.741943	0.458122
F21C3.3	C06H2.7	1190.21	1219.74	1410.35	839.317	744.439	833.477	864.107	916.274	1141.82	996.339	1368.38	1006.01	990.788	1225.29	1526.68	1091.71	2192.91		1150.46	-0.660247	0.63277	0.215058	-3.07009	0.00213996	0.0241844		1150.46	-0.516653	0.698992	0.240507	-2.14818	0.0316995	0.24612		1150.46	-0.121675	0.91912	0.214659	-0.566829	0.570831	0.973655		1150.46	0.45677	1.37247	0.214211	2.13233	0.0329797
B0495.6	C06H5.6	531.115	404.554	535.234	280.101	300.109	311.982	311.078	348.797	679.75	512.791	677.5	478.783	490.048	750.066	817.794	631.382	1140.27		541.256	-0.721093	0.606638	0.234934	-3.06934	0.00214535	0.0241844		541.256	-0.571644	0.67285	0.262831	-2.17495	0.0296339	0.241858		541.256	-0.12137	0.919314	0.231862	-0.523455	0.600657	0.973655		541.256	0.469808	1.38492	0.23107	2.03318	0.0420342
F57B10.7	C06H5.8	2047.67	1982.21	2303.4	1692.44	1770.96	1498.61	1908.15	2002.03	1259.57	1325.32	1181.06	1363.2	1299.96	1413.73	1408.86	1361.28	1526.99		1608.56	-0.352469	0.783243	0.114833	-3.06941	0.0021448	0.0241844		1608.56	-0.110905	0.926007	0.12823	-0.864895	0.387096	0.701262		1608.56	0.114007	1.08223	0.116204	0.981096	0.326545	0.973655		1608.56	0.189996	1.14076	0.11612	1.6362	0.101797
T24D1.2	ham-2	2037.01	1715.55	1909.7	1271.3	1447.52	1178.4	1459.83	1602.93	967.68	703.913	738.317	752.373	745.764	737.197	1148.48	766.615	814.998		1176.33	-0.539138	0.688182	0.17557	-3.07079	0.00213497	0.0241844		1176.33	-0.301611	0.811346	0.1962	-1.53726	0.12423	0.423198		1176.33	-0.109153	0.927132	0.178079	-0.612948	0.539911	0.973655		1176.33	0.178753	1.1319	0.177664	1.00613	0.314353
C09H6.3	C07A12.2	2032.74	2010.6	2056.22	1528.72	1657.49	1421.76	1692.63	1836.92	795.516	661.093	729.802	626.977	620.133	697.672	874.228	664.519	802.349		1218.2	-0.404856	0.755312	0.131798	-3.07178	0.00212783	0.0241844		1218.2	-0.204363	0.867922	0.147278	-1.3876	0.165258	0.481449		1218.2	-0.169207	0.889331	0.136344	-1.24103	0.214595	0.973655		1218.2	0.0978371	1.07017	0.135764	0.720641	0.47113
B0511.6	nhr-35	7203.12	7263.72	7455.4	5989.62	5484.67	5441.85	5558.75	6169	3985.49	3134.19	3273.16	3292.58	3130.96	3242.93	3774.13	3173.93	3288		4756.56	-0.374005	0.771637	0.121891	-3.06836	0.00215238	0.0242081		4756.56	-0.31756	0.802426	0.136319	-2.32954	0.0198307	0.210636		4756.56	-0.104776	0.929949	0.122693	-0.853969	0.393122	0.973655		4756.56	-0.0222839	0.984673	0.122656	-0.181678	0.855836
ZK1307.8	pdi-2	5476.46	4541.34	5313.47	3675.83	4012.76	3564.47	4069.44	4303.65	2459.77	1977.01	2324.42	2189.67	2092.06	2174.82	2802.87	2080.43	2819.97		3286.97	-0.446215	0.733966	0.145544	-3.06583	0.00217065	0.0243578		3286.97	-0.28769	0.819213	0.162721	-1.76799	0.0770621	0.347072		3286.97	-0.0665293	0.954933	0.146599	-0.453817	0.64996	0.973655		3286.97	0.188081	1.13925	0.146444	1.28432	0.199031
F36F2.4	C07A12.7	1984.75	1776.39	1914.68	1317.66	1239.67	1490.38	1348.01	1388.63	930.081	731.067	903.738	703.925	825.954	866.804	1118.77	888.413	1274.9		1217.87	-0.487428	0.713295	0.159056	-3.06451	0.0021803	0.0244104		1217.87	-0.467464	0.723235	0.178038	-2.62564	0.00864856	0.169966		1217.87	-0.097562	0.934611	0.161533	-0.603976	0.54586	0.973655		1217.87	0.355784	1.27968	0.160884	2.21143	0.0270059
Y55F3AM.9	C07A4.2	877.727	848.65	827.271	654.884	673.389	614.815	725.85	739.143	269.13	252.74	251.782	210.892	217.403	202.224	303.95	226.581	235.825		478.368	-0.39451	0.760748	0.128826	-3.06234	0.00219614	0.0245318		478.368	-0.21666	0.860556	0.143921	-1.5054	0.132221	0.437766		478.368	-0.295822	0.814608	0.143686	-2.05881	0.0395124	0.973655		478.368	-0.016758	0.988451	0.141905	-0.118093	0.905994
Y73E7A.1	clec-162	874.527	758.412	914.982	511.875	595.975	535.219	679.086	615.588	328.497	285.116	324.762	253.641	288.683	298.74	339.592	316.139	593.629		500.851	-0.633153	0.644766	0.206879	-3.0605	0.00220966	0.0246269		500.851	-0.391629	0.762268	0.231131	-1.6944	0.0901893	0.367619		500.851	-0.157577	0.896529	0.213045	-0.739643	0.459517	0.973655		500.851	0.413641	1.33204	0.211329	1.95733	0.0503083
F08C6.1	ncx-7	86.3862	98.3502	78.7402	143.009	124.073	138.15	112.842	127.929	587.732	650.649	442.747	642.177	645.972	509.236	547.506	523.913	458.098		348.089	0.622216	1.53924	0.203359	3.05969	0.00221567	0.024638		348.089	0.454118	1.36995	0.229049	1.98263	0.0474092	0.28316		348.089	0.0949864	1.06806	0.174917	0.543037	0.587104	0.973655		348.089	-0.1381	0.908715	0.175487	-0.78695	0.431311
W03C9.5	bud-31	1492.03	1325.19	1508.03	962.601	831.396	930.457	989.148	1060.6	534.302	390.599	527.89	386.636	387.583	580.014	648.493	523.017	940.591		824.622	-0.666682	0.629954	0.218074	-3.05714	0.00223462	0.0247368		824.622	-0.492415	0.710834	0.243825	-2.01954	0.043431	0.274864		824.622	-0.101067	0.932343	0.221978	-0.455302	0.648892	0.973655		824.622	0.540216	1.45419	0.220854	2.44604	0.0144436
K04G2.10	tlk-1	2139.39	1484.38	2451.91	1024.74	1148.47	1178.4	1311.41	1222.43	1557.39	781.197	1115.38	620.328	887.432	1101.2	1945.48	1040.66	1718.54		1336.98	-0.858184	0.551647	0.2807	-3.0573	0.00223339	0.0247368		1336.98	-0.676736	0.625579	0.313852	-2.15623	0.0310659	0.245441		1336.98	-0.404871	0.755304	0.281451	-1.43851	0.150289	0.973655		1336.98	0.445534	1.36182	0.280877	1.58622	0.112688
F35G2.3	ncx-6	204.767	137.893	261.139	89.7507	114.529	100.639	118.942	158.544	144.459	78.3286	147.177	97.8465	122.958	115.819	230.685	131.65	337.926		152.533	-0.986392	0.504739	0.323185	-3.05209	0.00227252	0.0249317		152.533	-0.537586	0.688923	0.359403	-1.49578	0.134712	0.441394		152.533	-0.134689	0.910866	0.32551	-0.413779	0.679036	0.974801		152.533	0.921626	1.89425	0.320987	2.87122	0.00408889
F57B10.11	C07B5.3	2021.01	1726.7	2359.22	1226.92	1209.98	1249.76	1337.84	1379.88	538.259	467.883	553.433	343.888	394.711	438.458	627.701	487.194	1132.14		1029.12	-0.72813	0.603686	0.238465	-3.0534	0.00226263	0.0249317		1029.12	-0.583122	0.667518	0.266657	-2.18679	0.0287581	0.239759		1029.12	-0.405657	0.754892	0.242963	-1.66962	0.0949936	0.973655		1029.12	0.527243	1.44117	0.241382	2.18427	0.0289426
F09E5.11	C07B5.6	1030.24	904.416	1188.08	667.705	664.905	748.391	703.485	722.741	29.6834	12.5326	20.6777	28.499	21.3839	38.6063	26.7318	25.0762	37.9489		404.182	-0.585357	0.666484	0.191766	-3.05246	0.00226976	0.0249317		404.182	-0.545735	0.685042	0.214715	-2.54167	0.0110324	0.183658		404.182	0.482593	1.39725	0.303704	1.58903	0.112055	0.973655		404.182	0.507292	1.42138	0.30344	1.6718	0.0945634
ZC376.5	C07C7.1	2429.48	2239.75	2550.59	1707.24	1850.49	1755.7	1891.89	1965.94	824.21	632.895	743.182	657.376	630.825	711.46	902.939	644.816	811.384		1350.01	-0.442396	0.735912	0.144887	-3.05339	0.00226268	0.0249317		1350.01	-0.319253	0.801485	0.162025	-1.97039	0.0487933	0.287206		1350.01	-0.138172	0.90867	0.149303	-0.925451	0.354732	0.973655		1350.01	0.0998314	1.07165	0.148843	0.670718	0.5024
T03E6.7	bath-44	2502	2352.29	2410.05	3303.02	3636.3	2809.67	3557.07	3331.61	9606.55	9343.03	9471.62	9726.7	7438.93	9534.85	9503.64	8044.98	8449.06		6177.73	0.424249	1.34187	0.139156	3.04874	0.00229805	0.0251557		6177.73	0.508421	1.42249	0.155522	3.26912	0.00107882	0.0983518		6177.73	-0.0901343	0.939435	0.137879	-0.653719	0.513293	0.973655		6177.73	-0.128624	0.914703	0.137889	-0.932809	0.350919
T09F3.5	nas-7	662.294	630.658	758.498	476.369	517.502	444.643	595.725	548.89	212.731	206.787	225.022	184.293	183.545	180.163	213.854	206.878	321.662		386.442	-0.512725	0.700897	0.168225	-3.04786	0.00230475	0.025173		386.442	-0.256749	0.836972	0.187741	-1.36757	0.171447	0.489016		386.442	-0.233298	0.850688	0.181161	-1.2878	0.197817	0.973655		386.442	0.205623	1.15318	0.178687	1.15074	0.249839
C01G6.6	C07D10.5	1598.68	1562.45	1888.77	1246.65	1312.84	1182.06	1319.54	1325.21	1326.85	1358.74	1003.48	956.615	1053.16	910.926	998.976	979.762	889.992		1230.28	-0.432914	0.740764	0.142272	-3.04286	0.00234337	0.0251898		1230.28	-0.34826	0.785531	0.159184	-2.18777	0.0286861	0.239759		1230.28	-0.337796	0.791249	0.143302	-2.35722	0.0184121	0.973655		1230.28	-0.363916	0.777053	0.143368	-2.53833	0.0111384
F18A1.8	stip-1	660.161	542.447	782.419	306.73	343.587	309.238	430.02	412.214	132.586	131.592	181.234	101.646	87.3176	140.637	187.122	151.353	542.127		320.143	-1.04889	0.483341	0.344608	-3.04371	0.00233678	0.0251898		320.143	-0.651898	0.636442	0.384844	-1.69393	0.0902787	0.367773		320.143	-0.433024	0.740708	0.355546	-1.21791	0.223257	0.973655		320.143	0.985432	1.97991	0.350427	2.81209	0.00492208
F55A11.1	pro-2	4697.92	4378.1	4912.79	3705.42	3457.08	3682.49	3631.28	3772.25	1903.7	1946.73	1885.32	1715.64	1804.27	1913.77	2266.26	2047.29	2726		2967.43	-0.367192	0.77529	0.120546	-3.04608	0.00231848	0.0251898		2967.43	-0.333058	0.793852	0.134855	-2.46975	0.0135207	0.189471		2967.43	-0.0780646	0.947328	0.122207	-0.638789	0.522961	0.973655		2967.43	0.295489	1.2273	0.12189	2.42423	0.0153407
W02B12.15	C07E3.3	1187.01	1041.3	1257.85	726.882	700.96	757.54	734.999	785.066	135.554	134.725	195.83	146.295	147.905	237.153	171.281	183.593	283.713		519.274	-0.67365	0.626919	0.221208	-3.04533	0.00232428	0.0251898		519.274	-0.612613	0.654011	0.247553	-2.47467	0.0133359	0.188263		519.274	0.192921	1.14308	0.23628	0.816494	0.414218	0.973655		519.274	0.459011	1.3746	0.235058	1.95276	0.0508486
R12E2.3	ceh-58	3972.7	3550.75	4767.27	2528.8	2612.96	2441.88	2850.54	3130.42	1825.53	1503.91	1850.05	1391.7	1341.84	1740.96	2281.11	1458.9	3248.25		2499.86	-0.696646	0.617005	0.228917	-3.04323	0.00234057	0.0251898		2499.86	-0.454195	0.729917	0.255908	-1.77484	0.0759246	0.344895		2499.86	-0.211022	0.863925	0.22983	-0.918167	0.358532	0.973655		2499.86	0.432183	1.34927	0.229501	1.88314	0.059681
Y53F4B.3	C07E3.9	1319.26	1054.48	1227.95	571.051	712.625	752.966	736.016	820.055	330.475	233.941	322.329	175.744	210.275	225.204	389.096	233.746	645.132		585.902	-0.822386	0.565506	0.270312	-3.04236	0.00234729	0.0251898		585.902	-0.625837	0.648044	0.302221	-2.07079	0.0383784	0.262424		585.902	-0.536344	0.689516	0.277743	-1.93108	0.0534734	0.973655		585.902	0.516264	1.43025	0.274836	1.87844	0.0603206
R10F2.1	tol-1	1140.08	1276.52	733.58	1940.98	1724.3	1679.76	1724.15	1708.99	2618.08	3150.9	2594.45	3995.56	3329.65	2480.92	2591.99	2607.03	1399.59		2158.62	0.762851	1.69684	0.250564	3.04453	0.00233045	0.0251898		2158.62	0.709154	1.63485	0.280121	2.5316	0.0113544	0.185416		2158.62	0.229536	1.17246	0.24937	0.920465	0.35733	0.973655		2158.62	-0.342032	0.788929	0.249566	-1.37051	0.170529
F56H11.4	C07F11.2	2947.8	2734.54	3416.73	1836.44	2027.59	1485.8	2072.84	2349.73	492.745	424.019	608.169	455.984	350.162	492.691	497.013	413.757	913.485		1383.5	-0.766369	0.587895	0.251626	-3.04566	0.00232168	0.0251898		1383.5	-0.455918	0.729046	0.281252	-1.62103	0.105011	0.392194		1383.5	-0.230984	0.852053	0.256223	-0.901495	0.367325	0.973655		1383.5	0.259493	1.19706	0.255414	1.01597	0.309644
C08B6.8	svh-1	1511.23	1506.68	1854.88	1013.89	965.014	1052.14	1013.55	1116.37	303.76	311.226	336.925	243.191	259.28	331.831	330.682	295.541	611.7		768.111	-0.684904	0.622047	0.225392	-3.03873	0.00237578	0.0253847		768.111	-0.609108	0.655602	0.252143	-2.41573	0.0157038	0.202698		768.111	-0.189672	0.876805	0.233128	-0.813598	0.415875	0.973655		768.111	0.379977	1.30132	0.231551	1.64101	0.100796
T19H5.4	wsp-1	3984.43	3737.31	4242.01	2945.99	3046.69	2857.24	3022.34	3290.06	383.906	474.149	509.645	479.733	406.294	501.883	513.844	420.922	549.356		1845.05	-0.434993	0.739697	0.14313	-3.03914	0.00237257	0.0253847		1845.05	-0.337505	0.791409	0.160066	-2.10855	0.0349838	0.253113		1845.05	0.0226822	1.01585	0.152002	0.149223	0.881377	0.993187		1845.05	0.119398	1.08628	0.151751	0.786797	0.4314
T19D2.2	hgrs-1	403.136	352.844	351.839	505.957	544.013	483.984	503.215	371.758	1207.13	1434.98	1442.58	1586.44	1397.08	1463.36	1179.17	1289.63	1040.88		915.177	0.469469	1.3846	0.154814	3.03247	0.00242564	0.0257994		915.177	0.246062	1.18597	0.174099	1.41334	0.157555	0.471277		915.177	0.122864	1.08889	0.147253	0.834376	0.404069	0.973655		915.177	-0.218509	0.859453	0.147662	-1.47979	0.138929
Y49E10.2	cpg-1	539.647	512.029	612.978	381.687	322.378	451.963	359.875	408.934	492.745	553.522	518.16	427.485	514.105	538.65	528.695	599.142	728.258		499.427	-0.52479	0.69506	0.173058	-3.03245	0.00242577	0.0257994		499.427	-0.530111	0.692501	0.194303	-2.72827	0.0063667	0.153252		499.427	-0.0794753	0.946402	0.172121	-0.461741	0.644267	0.973655		499.427	0.247179	1.18688	0.171389	1.44221	0.149244
T06D10.2	atf-7	4438.76	3680.53	4338.69	2680.68	2936.4	2567.22	3149.42	3392.84	539.249	356.134	476.804	349.587	421.441	353.892	724.728	403.906	556.584		1845.11	-0.606187	0.656931	0.199937	-3.03188	0.00243034	0.0257994		1845.11	-0.344257	0.787713	0.22349	-1.54037	0.12347	0.421455		1845.11	-0.286514	0.819881	0.207115	-1.38336	0.166556	0.973655		1845.11	0.295591	1.22739	0.205776	1.43647	0.150868
C18F3.4	cct-5	2424.15	2105.91	2331.31	1697.37	1532.36	1989	1534.04	1653.23	1799.8	1880.93	1971.68	1914.18	1874.66	1918.37	2045.47	1908.48	2349.22		1937.07	-0.394319	0.760849	0.130172	-3.02921	0.00245192	0.0259724		1937.07	-0.521267	0.69676	0.145946	-3.57165	0.000354746	0.0769616		1937.07	0.0141207	1.00984	0.130286	0.108382	0.913692	0.994499		1937.07	0.157456	1.11532	0.130176	1.20956	0.22645
Y17G9B.5	clh-5	2056.21	1649.65	2117.02	1212.13	1268.3	1285.44	1363.26	1419.24	461.083	418.797	484.102	379.036	392.038	452.246	625.721	503.315	1008.36		1005.64	-0.628723	0.646749	0.207786	-3.02581	0.00247965	0.0261765		1005.64	-0.480401	0.716779	0.232346	-2.06761	0.0386765	0.263515		1005.64	-0.156652	0.897105	0.213262	-0.734549	0.462614	0.973655		1005.64	0.648533	1.56757	0.211709	3.06332	0.00218895
Y59E9AL.7	cls-1	1775.72	1843.31	1872.82	1329.49	1178.16	1340.33	1254.48	1391.91	353.233	299.737	356.387	293.539	293.138	426.508	379.195	388.681	515.021		899.509	-0.513043	0.700743	0.169571	-3.02555	0.00248184	0.0261765		899.509	-0.468434	0.722749	0.189758	-2.46859	0.0135646	0.189506		899.509	0.00592612	1.00412	0.178756	0.033152	0.973553	1		899.509	0.346873	1.2718	0.177684	1.95219	0.0509153
T06A10.3	sap-140	1144.35	1047.38	1218.98	699.266	579.008	684.348	695.352	774.132	220.647	160.835	193.398	131.095	152.36	213.254	310.88	174.638	454.483		520.847	-0.797124	0.575495	0.263613	-3.02385	0.00249584	0.0262268		520.847	-0.629888	0.646227	0.294778	-2.13682	0.0326127	0.24746		520.847	-0.21095	0.863968	0.27494	-0.76726	0.442927	0.973655		520.847	0.709005	1.63468	0.271654	2.60995	0.00905545
ZK822.2	clk-2	2132.99	2005.53	2509.72	1391.63	1241.79	1772.17	1512.7	1571.22	951.848	640.206	703.043	607.978	632.607	788.673	1071.25	766.615	934.266		1249.07	-0.593364	0.662796	0.19624	-3.02367	0.00249728	0.0262268		1249.07	-0.523304	0.695777	0.219514	-2.38392	0.0171294	0.205487		1249.07	-0.178172	0.883822	0.199118	-0.894806	0.370891	0.973655		1249.07	0.27156	1.20711	0.198501	1.36806	0.171294
CD4.7	cux-7	681.491	601.254	769.462	335.332	383.885	365.047	444.253	472.351	269.13	246.474	323.546	184.293	192.455	267.487	419.788	263.3	870.114		417.039	-0.920563	0.528303	0.304714	-3.02107	0.00251885	0.0262504		417.039	-0.577923	0.669927	0.340339	-1.69808	0.0894922	0.366624		417.039	-0.380569	0.768134	0.309152	-1.23101	0.21832	0.973655		417.039	0.889143	1.85208	0.306347	2.9024	0.00370311
R12C12.6	zyg-11	1329.92	1290.72	1586.77	924.136	821.852	1024.69	943.401	1013.59	813.326	838.638	940.229	661.176	670.029	819.006	1031.65	916.176	1624.58		1014.7	-0.602462	0.658629	0.199541	-3.01924	0.00253408	0.0262504		1014.7	-0.519463	0.697631	0.223247	-2.32685	0.0199731	0.21083		1014.7	-0.26933	0.829705	0.200819	-1.34116	0.179869	0.973655		1014.7	0.463209	1.37861	0.199948	2.31665	0.0205229
B0261.7	hda-2	2809.15	2571.3	3367.89	1634.25	1713.69	1460.19	1928.48	2132.14	246.372	231.853	311.382	239.391	219.185	306.093	279.198	270.465	710.187		1201.84	-0.863605	0.549578	0.286048	-3.01909	0.00253531	0.0262504		1201.84	-0.522381	0.696222	0.319726	-1.63384	0.102292	0.389065		1201.84	-0.0453444	0.969058	0.29413	-0.154164	0.87748	0.993187		1201.84	0.675555	1.59721	0.292478	2.30976	0.0209014
ZK1098.11	swsn-7	291.154	209.881	288.05	150.899	141.04	214.088	199.253	171.665	157.322	194.255	189.749	163.394	178.199	190.274	214.844	216.73	294.556		203.844	-0.63803	0.64259	0.21116	-3.02155	0.00251481	0.0262504		203.844	-0.503212	0.705534	0.236457	-2.12813	0.0333262	0.249706		203.844	-0.0239397	0.983543	0.21353	-0.112114	0.910733	0.994499		203.844	0.425573	1.34311	0.211327	2.01381	0.0440291
C33H5.14	nrf-6	1569.88	1518.85	1831.96	1157.88	1136.81	1202.18	1178.24	1303.34	1545.52	1236.55	1449.87	1123.81	1261.65	1423.84	1779.15	1356.8	1984.19		1415.32	-0.492774	0.710657	0.163229	-3.0189	0.00253692	0.0262504		1415.32	-0.402824	0.756376	0.182611	-2.20591	0.0273903	0.235935		1415.32	-0.151736	0.900167	0.163272	-0.929341	0.352712	0.973655		1415.32	0.274775	1.20981	0.16289	1.68688	0.0916271
F53F4.10	ubh-4	4072.95	3870.13	4566.93	2838.49	2512.22	2971.61	2858.67	3065.91	2444.92	2443.85	2770.82	2298.92	2100.08	3209.84	2546.45	2566.73	3922.29		3003.58	-0.587963	0.665282	0.194756	-3.01897	0.00253632	0.0262504		3003.58	-0.493372	0.710363	0.217788	-2.26538	0.0234896	0.22276		3003.58	-0.00948878	0.993444	0.195086	-0.0486391	0.961207	0.99925		3003.58	0.238519	1.17978	0.194989	1.22324	0.221239
K02B12.7	srxa-19	1919.69	1869.67	1909.7	1570.14	1509.03	1485.8	1582.84	1544.98	303.76	327.936	369.766	366.687	342.143	328.154	344.543	325.99	359.611		968.262	-0.320145	0.800989	0.105958	-3.02143	0.00251582	0.0262504		968.262	-0.280536	0.823285	0.118658	-2.36424	0.018067	0.205487		968.262	0.0531055	1.0375	0.120418	0.441011	0.659205	0.974801		968.262	0.0437569	1.03079	0.120546	0.362991	0.716612
C47E12.7	wdr-20	1925.03	1617.2	1945.58	1384.72	1313.9	1351.31	1425.27	1349.26	737.138	602.608	728.586	567.129	624.588	670.096	830.665	673.475	910.774		1097.49	-0.438253	0.738028	0.145207	-3.01813	0.00254339	0.0262621		1097.49	-0.398924	0.758424	0.162531	-2.45445	0.0141101	0.192965		1097.49	-0.15137	0.900395	0.149354	-1.0135	0.310823	0.973655		1097.49	0.223601	1.16764	0.148592	1.5048	0.132375
C15H11.4	C08B6.8	3532.24	3261.78	4096.49	2402.56	2226.95	2195.77	2588.25	2802.4	747.033	603.652	789.403	512.031	564.892	655.389	875.218	695.864	1470.07		1765.88	-0.674129	0.62671	0.223409	-3.01747	0.00254893	0.0262642		1765.88	-0.429612	0.742462	0.249743	-1.72022	0.0853929	0.358318		1765.88	-0.304623	0.809654	0.227098	-1.34137	0.179799	0.973655		1765.88	0.507352	1.42144	0.226062	2.2443	0.0248129
F45H11.5	egl-5	387.138	346.76	419.616	269.252	202.547	272.641	246.016	275.538	340.37	292.427	310.166	267.89	267.299	346.538	383.155	327.781	560.198		324.431	-0.630618	0.6459	0.209214	-3.01423	0.00257632	0.026271		324.431	-0.560605	0.678018	0.234553	-2.3901	0.0168439	0.204649		324.431	-0.0971917	0.934851	0.209102	-0.464805	0.642071	0.973655		324.431	0.430754	1.34794	0.207542	2.0755	0.0379404
C44E4.5	cyk-7	917.187	885.152	1156.19	668.692	653.24	561.751	792.945	764.291	1866.1	1356.65	1627.46	1214.06	1373.92	1507.49	2060.33	1532.33	2941.04		1286.99	-0.651656	0.636549	0.216192	-3.01425	0.00257617	0.026271		1286.99	-0.340986	0.789502	0.241433	-1.41234	0.157849	0.47176		1286.99	-0.24405	0.844372	0.214147	-1.13963	0.254439	0.973655		1286.99	0.429803	1.34705	0.213747	2.01081	0.044346
Y46G5A.35	tmd-2	383.939	351.83	463.471	255.444	270.416	260.748	299.896	324.742	25.7256	21.932	21.8941	19.9493	15.1469	21.1416	27.7218	15.2248	38.8525		165.769	-0.608771	0.655755	0.20194	-3.01461	0.0025731	0.026271		165.769	-0.356507	0.781054	0.225347	-1.58203	0.113642	0.407246		165.769	-0.313504	0.804685	0.320386	-0.97852	0.327817	0.973655		165.769	0.228105	1.1713	0.303652	0.751208	0.452528
Y37E11C.1	C08E8.4	2388.95	2465.85	1896.74	3233.98	3567.37	2691.65	3357.82	3376.44	2313.33	2411.48	2320.77	2474.66	2363.81	2505.74	2680.11	2057.14	1834.2		2584.71	0.491552	1.40596	0.163041	3.01489	0.0025707	0.026271		2584.71	0.581327	1.49622	0.182221	3.19023	0.0014216	0.0983518		2584.71	0.0598636	1.04237	0.163188	0.366837	0.71374	0.974801		2584.71	-0.100746	0.932551	0.163292	-0.616968	0.537256
C10F3.5	C08F8.2	699.622	741.175	824.281	560.202	521.744	590.113	535.746	605.747	145.449	179.634	161.773	165.294	159.488	167.294	145.54	198.818	176.191		386.948	-0.437665	0.738328	0.1451	-3.01629	0.00255886	0.026271		386.948	-0.404292	0.755607	0.162699	-2.4849	0.0129587	0.186904		386.948	0.016024	1.01117	0.165522	0.0968094	0.922878	0.994499		386.948	0.0995183	1.07142	0.164972	0.603244	0.546347
T06D8.7	mboa-4	1800.25	1710.48	2135.95	1184.51	1090.15	1321.12	1177.22	1365.66	96.9659	75.1954	119.201	73.1474	90.8816	101.112	141.579	99.4091	196.973		751.753	-0.650968	0.636853	0.216151	-3.01164	0.00259839	0.0264412		751.753	-0.566106	0.675437	0.241777	-2.34144	0.0192096	0.207846		751.753	-0.130979	0.913212	0.246447	-0.531468	0.595094	0.973655		751.753	0.592308	1.50766	0.240698	2.46079	0.0138631
Y47D3A.14	rap-3	506.586	475.528	574.106	371.824	398.731	343.089	423.921	464.698	59.3668	53.2634	60.8169	43.6984	49.8958	66.1823	64.3542	63.586	77.7049		241.021	-0.48366	0.715161	0.160671	-3.01025	0.00261031	0.0265076		241.021	-0.223911	0.856241	0.179139	-1.24992	0.211327	0.530625		241.021	-0.115814	0.922861	0.218021	-0.531208	0.595274	0.973655		241.021	0.248397	1.18789	0.212024	1.17155	0.241377
F25G6.8	nhr-67	1976.22	1732.79	1970.5	1151.96	1070	1505.02	1257.53	1310.99	879.619	794.774	700.61	759.973	583.603	821.764	1042.54	828.41	1386.94		1163.13	-0.607411	0.656373	0.201841	-3.00936	0.00261801	0.026531		1163.13	-0.55988	0.678359	0.225824	-2.47927	0.0131651	0.187061		1163.13	-0.134015	0.911292	0.204073	-0.656699	0.511375	0.973655		1163.13	0.45551	1.37127	0.20336	2.23992	0.0250962
T02C1.1	snt-6	715.619	647.894	824.281	436.918	457.056	540.708	512.365	499.687	198.879	147.258	164.206	113.046	140.777	200.385	206.924	175.533	243.054		366.152	-0.608395	0.655926	0.202743	-3.00082	0.00269251	0.0271793		366.152	-0.527259	0.693872	0.226973	-2.323	0.0201791	0.211125		366.152	-0.168839	0.889558	0.21753	-0.776162	0.437653	0.973655		366.152	0.292258	1.22456	0.214938	1.35973	0.173915
F15A4.11	C08G5.6	260.225	226.104	285.06	161.748	156.947	162.853	192.137	194.626	125.66	120.104	116.768	115.896	137.213	170.971	128.708	107.469	211.43		169.054	-0.679631	0.624325	0.226486	-3.00076	0.00269304	0.0271793		169.054	-0.41116	0.752018	0.252537	-1.62812	0.1035	0.390347		169.054	0.225871	1.16948	0.234488	0.963251	0.335421	0.973655		169.054	0.304161	1.2347	0.234073	1.29943	0.193797
C47D12.7	C08G9.2	155.708	153.102	135.553	248.54	223.756	189.385	227.718	179.319	192.942	183.811	181.234	242.241	197.801	174.648	204.944	180.011	149.085		189.4	0.573907	1.48855	0.191339	2.99942	0.00270492	0.0272432		189.4	0.460119	1.37565	0.214637	2.14371	0.0320562	0.246387		189.4	0.138388	1.10067	0.189338	0.730905	0.464837	0.973655		189.4	-0.0652595	0.955773	0.190678	-0.34225	0.732163
E02H1.1	ctsa-3.2	1052.63	975.39	1256.85	752.525	886.54	780.413	829.543	928.302	477.903	407.309	415.987	388.536	401.839	470.63	466.321	395.845	448.159		666.749	-0.441637	0.736298	0.14733	-2.9976	0.00272113	0.0273505		666.749	-0.317424	0.802502	0.164797	-1.92615	0.0540856	0.301677		666.749	-0.0460153	0.968608	0.153152	-0.300455	0.76383	0.979046		666.749	0.00882774	1.00614	0.153016	0.0576915	0.953994
Y55F3BL.1	C08H9.15	437.264	442.069	489.386	339.277	307.532	345.834	333.444	353.17	203.826	214.098	187.316	208.042	232.55	168.213	211.874	209.565	261.125		290.858	-0.462997	0.725478	0.154545	-2.99587	0.00273664	0.0274406		290.858	-0.410769	0.752222	0.173432	-2.36847	0.0178616	0.205487		290.858	0.00739054	1.00514	0.164667	0.0448818	0.964201	0.999523		290.858	0.172549	1.12705	0.163718	1.05394	0.291911
F09E5.15	C08H9.16	17345.5	15407.5	19965.1	11842.2	12613	9866.32	12097.5	13246.6	2182.72	2613.04	2581.07	2134.57	2062.66	2783.33	1942.51	2639.27	3570.81		7934.93	-0.619213	0.651026	0.206724	-2.99535	0.00274127	0.0274406		7934.93	-0.471696	0.721116	0.231129	-2.04084	0.0412671	0.269385		7934.93	-0.0795695	0.94634	0.207881	-0.382764	0.701895	0.974801		7934.93	0.144489	1.10534	0.207792	0.695351	0.486835
F29F11.3	vgln-1	968.379	931.792	1041.56	623.323	571.585	692.582	660.788	820.055	268.14	217.231	282.19	213.742	213.839	266.568	335.632	248.971	494.239		520.625	-0.639902	0.641757	0.213711	-2.99424	0.00275126	0.0274847		520.625	-0.405556	0.754945	0.238813	-1.69822	0.0894669	0.366624		520.625	-0.144247	0.904851	0.222606	-0.647993	0.51699	0.973655		520.625	0.492037	1.40643	0.220427	2.23219	0.0256021
B0464.9	algn-8	1091.03	1050.42	1388.42	764.36	775.192	619.39	884.439	938.142	730.212	529.501	695.745	530.081	504.304	626.894	836.605	540.033	1184.55		805.254	-0.709616	0.611483	0.23725	-2.991	0.00278064	0.0277218		805.254	-0.368782	0.774436	0.264997	-1.39165	0.16403	0.480521		805.254	-0.23515	0.849596	0.238824	-0.98462	0.324811	0.973655		805.254	0.389377	1.30983	0.237991	1.6361	0.101818
ZK1127.5	ser-7	1578.41	1610.1	1806.04	1221.99	1184.53	1192.12	1200.6	1386.44	993.405	783.286	975.502	789.421	890.996	958.724	1277.18	915.281	1259.54		1177.86	-0.472964	0.720483	0.158182	-2.99001	0.00278973	0.0277561		1177.86	-0.364331	0.776829	0.176933	-2.05915	0.0394801	0.265624		1177.86	-0.0602311	0.95911	0.159899	-0.376682	0.70641	0.974801		1177.86	0.326774	1.25421	0.159382	2.05025	0.0403401
Y38C1AA.2	ipp-5	4318.24	3978.62	4323.74	2875.97	3009.57	2904.82	3076.22	3499.99	1529.69	1167.62	1486.36	1100.06	1105.73	1270.33	1834.59	1244.85	2050.15		2398.62	-0.521802	0.696501	0.174759	-2.98583	0.0028281	0.0280811		2398.62	-0.355533	0.781581	0.195386	-1.81965	0.0688123	0.331409		2398.62	-0.267195	0.830934	0.176714	-1.51202	0.130529	0.973655		2398.62	0.294059	1.22608	0.176222	1.66869	0.0951794
B0024.11	C09B8.3	1646.67	1560.42	1775.14	1241.72	1228.01	1234.21	1346.99	1395.19	961.743	740.466	805.215	787.522	762.693	800.622	1135.6	811.394	933.363		1127.47	-0.42776	0.743415	0.14332	-2.98465	0.00283904	0.0280916		1127.47	-0.276589	0.82554	0.160238	-1.72612	0.084326	0.357002		1127.47	-0.0936143	0.937172	0.145844	-0.641879	0.520952	0.973655		1127.47	0.198931	1.14785	0.145354	1.3686	0.171126
F35H10.7	C09B8.4	920.386	878.054	1093.39	653.898	739.137	600.177	750.248	762.104	580.806	497.125	561.948	469.283	480.247	556.115	659.383	457.64	751.75		671.276	-0.537459	0.688983	0.180084	-2.98448	0.00284059	0.0280916		671.276	-0.350353	0.784392	0.201287	-1.74056	0.0817603	0.354992		671.276	-0.123128	0.918195	0.182503	-0.674664	0.499889	0.973655		671.276	0.188316	1.13943	0.181854	1.03553	0.300421
F42G8.6	hsp-25	815.87	733.064	957.84	564.147	500.535	548.942	589.626	640.736	171.174	109.66	154.475	117.796	131.867	153.506	236.626	164.786	304.495		405.597	-0.635416	0.643755	0.213058	-2.98236	0.00286034	0.0282301		405.597	-0.441967	0.73613	0.238165	-1.85572	0.0634942	0.322219		405.597	-0.110279	0.926409	0.230629	-0.478167	0.632531	0.973655		405.597	0.697339	1.62151	0.226236	3.08236	0.00205368
M18.7	pak-1	14221.7	12531	15160	9157.53	10140.1	8936.78	10192.4	11290.5	3675.8	2399.99	2903.4	2394.86	2532.21	2438.63	4086	2498.66	3857.24		6965.7	-0.569956	0.673638	0.191225	-2.98055	0.00287732	0.0283408		6965.7	-0.379248	0.768838	0.213793	-1.77391	0.0760787	0.344895		6965.7	-0.285854	0.820256	0.192235	-1.487	0.137014	0.973655		6965.7	0.217531	1.16274	0.192041	1.13273	0.257326
F35G12.9	C09B8.8	1600.81	1481.34	1753.22	921.177	922.595	985.352	910.87	1103.25	456.135	346.735	480.453	303.039	365.309	546.923	650.473	429.877	976.733		837.311	-0.773231	0.585106	0.259637	-2.97812	0.00290024	0.0283484		837.311	-0.678634	0.624757	0.290408	-2.33683	0.019448	0.209546		837.311	-0.0780989	0.947305	0.263773	-0.296083	0.767166	0.979046		837.311	0.681126	1.60339	0.262567	2.59411	0.00948371
T01D3.3	C09B9.1	504.453	564.753	455.497	806.77	647.938	720.029	674.003	642.923	434.367	482.504	414.771	596.578	411.64	401.69	366.324	322.408	321.662		515.783	0.512605	1.42662	0.172117	2.97824	0.00289908	0.0283484		515.783	0.373763	1.29573	0.192787	1.93874	0.0525334	0.297357		515.783	0.0813484	1.05801	0.174154	0.467107	0.640424	0.973655		515.783	-0.39928	0.758237	0.175745	-2.27193	0.0230908
C48E7.6	hot-9	412.734	434.971	377.754	569.078	517.502	572.73	443.236	438.456	2352.91	2305.99	2171.16	2411.01	1950.39	2117.83	2116.76	2058.04	1595.66		1343.9	0.437814	1.35455	0.147001	2.9783	0.0028985	0.0283484		1343.9	0.110166	1.07935	0.165889	0.664093	0.506631	0.787125		1343.9	-0.0763246	0.948471	0.138764	-0.550032	0.582297	0.973655		1343.9	-0.243507	0.844689	0.138907	-1.75302	0.0795985
T13F2.8	unc-89	59493.4	51770.7	57474.4	36585.7	37894.3	39303.4	38344	43028.8	31096.4	21691.8	29626.3	22400.2	19334.6	30030.2	32131.6	24390.2	34497.4		35829	-0.568498	0.674318	0.190898	-2.97802	0.00290116	0.0283484		35829	-0.467211	0.723362	0.213433	-2.18902	0.0285951	0.239759		35829	-0.199615	0.870783	0.190959	-1.04533	0.295871	0.973655		35829	0.143272	1.10441	0.190945	0.750332	0.453055
T19B10.6	C09D4.1	2205.51	1878.79	2612.38	1294.97	1545.08	1151.86	1639.77	1850.04	309.697	291.382	329.627	259.341	253.934	293.224	407.907	287.48	720.126		1019.48	-0.746554	0.596026	0.250944	-2.97498	0.00293006	0.0285739		1019.48	-0.355395	0.781656	0.280396	-1.26747	0.204986	0.525559		1019.48	-0.206326	0.866742	0.258719	-0.797488	0.425168	0.973655		1019.48	0.60546	1.52146	0.256765	2.35803	0.018372
T23H2.5	C09D4.3	5419.94	4696.47	5332.41	3543.67	3391.33	3679.74	3605.87	3783.19	1167.55	1126.89	1160.39	979.415	1038.9	1232.65	1471.24	1052.3	1930.88		2624.28	-0.541384	0.687111	0.182043	-2.97394	0.00294006	0.0286146		2624.28	-0.479079	0.717435	0.203581	-2.35326	0.0186096	0.206379		2624.28	-0.0877025	0.94102	0.184525	-0.475288	0.634581	0.973655		2624.28	0.366615	1.28932	0.184105	1.99133	0.0464446
C39E9.13	C09D4.4	5482.86	4845.52	6274.3	3605.81	3764.61	3074.99	3830.54	4356.13	1573.22	1023.49	1368.38	991.764	1074.54	1251.95	1972.21	1133.8	2182.97		2812.18	-0.668608	0.629113	0.225326	-2.96729	0.00300441	0.0291256		2812.18	-0.435136	0.739624	0.251903	-1.7274	0.0840967	0.357002		2812.18	-0.256946	0.836858	0.22714	-1.13123	0.25796	0.973655		2812.18	0.415494	1.33375	0.226674	1.833	0.0668027
T22H9.1	dgk-1	1249.93	1029.13	1147.22	804.797	885.48	787.732	963.733	926.115	442.283	426.107	363.685	434.134	454.408	347.457	539.586	403.906	412.92		683.448	-0.467624	0.723155	0.157563	-2.96784	0.00299897	0.0291256		683.448	-0.273228	0.827466	0.176075	-1.55177	0.120717	0.417122		683.448	0.00324004	1.00225	0.163553	0.0198104	0.984195	1		683.448	0.136292	1.09908	0.16318	0.835227	0.40359
Y25C1A.8	C09E8.1	883.059	750.3	845.212	523.71	674.449	500.452	694.335	752.263	520.449	385.377	574.111	420.835	429.46	416.397	571.268	436.146	625.254		588.416	-0.545848	0.684989	0.184143	-2.96426	0.0030341	0.0293555		588.416	-0.19193	0.875434	0.205368	-0.934566	0.350012	0.669161		588.416	-0.223477	0.856499	0.186742	-1.19672	0.231417	0.973655		588.416	0.142451	1.10378	0.185866	0.766417	0.443429
Y54G2A.75	lips-7	4075.08	3759.61	4232.04	2761.56	2556.76	2786.8	2594.35	2743.36	1650.4	1281.46	1527.72	1263.45	1221.56	1724.42	1911.82	1664.88	2808.22		2386.09	-0.574092	0.671709	0.194245	-2.95551	0.00312157	0.0300245		2386.09	-0.591802	0.663514	0.217288	-2.72358	0.0064578	0.153886		2386.09	-0.0833046	0.943893	0.195604	-0.425883	0.670193	0.974801		2386.09	0.517805	1.43177	0.195216	2.65247	0.00799047
ZK742.5	C09E9.1	980.11	824.316	1117.31	617.406	536.59	726.434	650.622	617.774	267.151	270.495	277.325	184.293	223.64	249.103	304.94	303.601	528.574		510.57	-0.635296	0.643809	0.214887	-2.95642	0.00311233	0.0300245		510.57	-0.618826	0.651201	0.240632	-2.57167	0.0101209	0.181163		510.57	-0.310223	0.806517	0.223679	-1.38691	0.165468	0.973655		510.57	0.481342	1.39604	0.220951	2.1785	0.0293686
W09D6.5	clc-1	610.036	618.491	456.494	823.536	698.84	855.435	680.103	628.709	367.085	459.528	431.8	458.833	375.109	474.307	357.414	417.339	337.926		532.411	0.497622	1.41188	0.168339	2.95607	0.00311589	0.0300245		532.411	0.220936	1.16549	0.188954	1.16926	0.2423	0.566214		532.411	0.0563803	1.03985	0.171646	0.328469	0.742557	0.975883		532.411	-0.176678	0.884738	0.172443	-1.02456	0.305573
K06H7.4	C09F12.2	4524.08	4147.94	4533.05	3045.6	3184.54	3021.93	3582.49	3701.18	2549.81	2278.84	2692.97	2170.67	2049.29	2676.71	2857.33	2385.82	3953.92		3138.6	-0.513265	0.700635	0.173711	-2.95471	0.00312959	0.0300428		3138.6	-0.273399	0.827368	0.194172	-1.40803	0.159123	0.473736		3138.6	-0.125052	0.916971	0.174267	-0.71759	0.47301	0.973655		3138.6	0.290263	1.22286	0.174074	1.66747	0.095421
C12D8.11	C09F12.3	900.123	908.472	995.715	718.005	790.039	620.305	897.655	894.406	626.32	568.143	637.361	496.832	433.024	541.408	512.854	458.536	458.098		673.959	-0.398919	0.758426	0.135194	-2.95071	0.00317048	0.0303761		673.959	-0.0611764	0.958482	0.150581	-0.406268	0.684545	0.882146		673.959	-0.316143	0.803214	0.138139	-2.28858	0.0221036	0.973655		673.959	-0.357937	0.780279	0.138327	-2.58761	0.00966447
C30H6.9	C09F5.1	569.509	555.628	735.573	404.371	445.391	395.239	422.904	466.884	329.486	300.782	350.305	280.24	275.318	372.276	383.155	357.336	564.716		424.065	-0.58028	0.668834	0.196739	-2.9495	0.00318289	0.0304356		424.065	-0.479786	0.717084	0.220229	-2.17858	0.0293632	0.241627		424.065	-0.0791782	0.946597	0.200676	-0.394557	0.69317	0.974801		424.065	0.413525	1.33194	0.199221	2.07571	0.0379212
Y55D5A.3	orai-1	153.575	154.116	120.602	231.774	180.277	210.428	186.037	156.357	345.317	412.531	426.934	426.535	449.062	436.619	313.851	428.982	347.865		292.992	0.541369	1.45535	0.183592	2.94876	0.0031905	0.0304492		292.992	0.264045	1.20084	0.207778	1.2708	0.203799	0.52516		292.992	0.148669	1.10855	0.169663	0.876258	0.38089	0.973655		292.992	-0.11733	0.921892	0.170584	-0.687814	0.49157
C34H3.1	C09F9.2	237.829	251.452	241.204	378.728	359.494	338.514	400.539	308.341	2393.47	3060.04	2767.17	2997.14	3081.07	3392.76	2079.14	3219.6	2149.54		1626.82	0.559438	1.4737	0.190116	2.94262	0.00325446	0.0309994		1626.82	0.542366	1.45636	0.212509	2.5522	0.0107044	0.182712		1626.82	0.204327	1.15215	0.178299	1.14598	0.251804	0.973655		1626.82	-0.142146	0.90617	0.17846	-0.796513	0.425734
F26H9.5	glna-1	1840.77	1728.73	2057.21	1281.17	1427.37	1187.55	1426.28	1593.09	2019.46	1557.17	1971.68	1336.6	1871.98	1719.82	2311.8	2246.11	3166.93		1808.46	-0.53051	0.69231	0.18055	-2.9383	0.00330021	0.0313138		1808.46	-0.313195	0.804857	0.201795	-1.55205	0.12065	0.417095		1808.46	-0.170738	0.888388	0.18024	-0.947285	0.343494	0.973655		1808.46	0.477587	1.39241	0.179857	2.65538	0.00792193
ZK512.4	C09G1.4	638.831	675.27	813.317	477.355	409.335	598.347	448.319	502.967	654.025	700.78	706.692	647.877	660.228	900.815	814.824	786.317	781.567		659.816	-0.517652	0.698508	0.176149	-2.93871	0.00329576	0.0313138		659.816	-0.576721	0.670486	0.197777	-2.91602	0.00354533	0.129482		659.816	0.0999092	1.07171	0.174939	0.571111	0.567925	0.973655		659.816	0.209083	1.15595	0.174782	1.19625	0.231598
F26F4.5	C09G1.5	1263.8	1245.09	1376.46	859.042	981.981	837.137	954.584	1116.37	1490.11	1086.16	1426.76	1071.56	1122.66	1156.35	1695.98	1251.12	2065.51		1235.33	-0.537102	0.689154	0.182874	-2.937	0.00331402	0.0313842		1235.33	-0.322998	0.799407	0.204372	-1.58044	0.114005	0.407246		1235.33	-0.256579	0.837071	0.182376	-1.40687	0.159467	0.973655		1235.33	0.324512	1.25224	0.181867	1.78434	0.0743689
C38D4.9	ceh-53	362.609	298.092	377.754	226.842	227.998	262.577	233.817	262.417	70.2508	79.373	80.2783	56.048	68.6067	69.8591	95.0463	66.2728	103.004		172.991	-0.532631	0.691293	0.181421	-2.93589	0.0033259	0.0314362		172.991	-0.480854	0.716553	0.203661	-2.36105	0.0182231	0.206017		172.991	-0.237574	0.848171	0.218227	-1.08865	0.276307	0.973655		172.991	0.202056	1.15034	0.212399	0.951303	0.341451
C06H2.2	hyl-1	896.924	817.219	934.916	581.9	608.701	720.029	632.323	718.368	637.204	575.454	662.904	591.829	581.821	616.782	708.887	602.724	904.449		693.673	-0.470929	0.7215	0.160542	-2.93336	0.00335312	0.0316326		693.673	-0.387104	0.764663	0.179717	-2.15396	0.0312432	0.245704		693.673	-0.0666604	0.954846	0.161754	-0.412109	0.680259	0.974801		693.673	0.241119	1.18191	0.161146	1.49628	0.134581
T27A10.3	pkg-2	445.796	393.401	485.399	318.566	330.862	332.11	339.543	344.423	241.425	263.184	243.267	265.99	233.441	267.487	203.953	209.565	267.45		305.051	-0.432498	0.740978	0.147587	-2.93046	0.0033846	0.0318684		305.051	-0.36875	0.774453	0.165588	-2.22691	0.0259533	0.229761		305.051	0.0356004	1.02498	0.153573	0.231815	0.816682	0.988417		305.051	-0.134467	0.911006	0.154679	-0.86933	0.384667
F14B8.1	cks-1	196.235	187.575	165.454	303.771	290.565	239.705	288.713	300.687	357.191	373.888	333.276	445.534	351.053	286.79	287.119	317.93	201.491		289.822	0.602291	1.51813	0.205617	2.92919	0.00339842	0.0318873		289.822	0.687031	1.60997	0.229175	2.99784	0.00271898	0.118126		289.822	0.0246808	1.01725	0.199527	0.123697	0.901555	0.994499		289.822	-0.400931	0.757369	0.201102	-1.99367	0.0461882
F52H3.5	C09G4.4	309.284	290.995	347.852	207.117	238.602	215.002	188.07	205.56	558.048	437.596	450.045	306.839	430.351	457.761	577.208	540.033	517.732		369.3	-0.521966	0.696422	0.178237	-2.9285	0.00340607	0.0318873		369.3	-0.68399	0.622441	0.202089	-3.3846	0.00071283	0.0906949		369.3	-0.275218	0.826325	0.171952	-1.60055	0.109476	0.973655		369.3	0.17635	1.13002	0.170731	1.03291	0.301645
R05D7.3	lgc-57	97.0512	103.42	71.7633	132.16	136.799	126.257	110.809	95.1263	237.467	289.294	285.839	284.99	267.299	279.436	274.248	315.243	274.678		198.934	0.538313	1.45227	0.183787	2.92901	0.00340042	0.0318873		198.934	0.1854	1.13713	0.210737	0.879771	0.378983	0.69491		198.934	0.0349114	1.02449	0.160654	0.217308	0.827969	0.990964		198.934	0.0907449	1.06492	0.160453	0.565555	0.571696
T13C2.4	C09G5.13	1834.37	1689.19	2193.76	1084.9	986.223	1107.95	1182.3	1268.35	347.296	314.359	443.963	284.99	301.157	375.952	532.655	348.38	1080.64		904.497	-0.846693	0.556058	0.289674	-2.92292	0.00346764	0.0323405		904.497	-0.637257	0.642934	0.323857	-1.96771	0.0491011	0.287206		904.497	-0.199758	0.870696	0.294824	-0.677551	0.498056	0.973655		904.497	0.828178	1.77544	0.293117	2.82542	0.00472183
F25H9.2	col-79	364.742	272.744	371.774	230.787	247.086	225.981	267.365	261.324	376.979	371.8	395.31	327.738	296.702	366.76	398.006	368.082	529.478		333.686	-0.520356	0.6972	0.178003	-2.9233	0.00346341	0.0323405		333.686	-0.347574	0.785904	0.198951	-1.74704	0.0806308	0.352667		333.686	-0.206733	0.866497	0.174793	-1.18273	0.236917	0.973655		333.686	0.180067	1.13294	0.173533	1.03765	0.299431
F53B1.8	bli-1	382.872	386.303	323.931	510.888	570.525	432.75	557.095	641.829	559.038	634.984	631.279	689.675	634.389	640.682	661.364	586.603	486.108		548.842	0.469361	1.3845	0.160639	2.92185	0.00347964	0.0323909		548.842	0.718223	1.64515	0.178613	4.02112	5.79229e-05	0.0492646		548.842	0.106584	1.07668	0.157174	0.678128	0.497691	0.973655		548.842	-0.0740635	0.949959	0.157623	-0.469877	0.638443
W01A8.5	npp-23	2885.94	2433.41	3022.03	1621.43	1647.95	1540.7	1853.26	1988.91	294.855	222.453	345.44	222.292	236.114	266.568	386.125	276.734	772.532		1177.45	-0.794253	0.576642	0.271914	-2.92097	0.00348945	0.0324209		1177.45	-0.533422	0.690914	0.303966	-1.75488	0.0792804	0.350703		1177.45	-0.249971	0.840913	0.280195	-0.892131	0.372323	0.973655		1177.45	0.735652	1.66515	0.277878	2.6474	0.00811144
C32E8.5	hdl-2	2457.21	1862.57	2480.82	1372.89	1434.79	1364.12	1577.76	1613.87	683.708	466.838	686.014	482.583	494.503	501.883	874.228	504.21	1185.45		1179.03	-0.705005	0.61344	0.241465	-2.9197	0.00350372	0.0324921		1179.03	-0.506402	0.703976	0.269955	-1.87588	0.0606723	0.317281		1179.03	-0.312141	0.805446	0.244993	-1.27408	0.202635	0.973655		1179.03	0.481517	1.39621	0.243888	1.97433	0.0483438
Y57G11C.13	nbs-1	3853.25	3582.18	4599.83	2749.72	3277.86	2597.41	3130.1	3339.26	1762.21	1562.39	1702.87	1651.04	1478.16	1826.45	2035.57	1748.17	2538.06		2554.97	-0.480846	0.716557	0.16487	-2.91652	0.00353963	0.0327632		2554.97	-0.310665	0.80627	0.184323	-1.68544	0.0919034	0.371841		2554.97	-0.0208028	0.985684	0.166136	-0.125216	0.900353	0.994499		2554.97	0.33052	1.25747	0.165894	1.99235	0.0463325
Y48B6A.14	C09H10.20	37019.2	38782.4	32472.9	49074.9	59307	45344.5	53871.5	62025.7	30337.4	23721	29024.2	23280.8	23120.5	29757.2	37815.5	28128.3	37692.3		37692.7	0.505664	1.41978	0.17348	2.91483	0.00355887	0.0328362		37692.7	0.683113	1.6056	0.19395	3.52211	0.000428119	0.0787477		37692.7	-0.125541	0.91666	0.173535	-0.723431	0.469415	0.973655		37692.7	0.318903	1.24738	0.173517	1.83788	0.0660798
W02D7.7	nuo-1	4311.85	4272.66	4802.16	3150.15	2811.26	3442.78	3044.71	3307.55	2556.73	2340.46	2908.26	2326.47	2213.24	2853.19	2903.86	2598.07	4017.16		3168.27	-0.509332	0.702547	0.174749	-2.91465	0.00356087	0.0328362		3168.27	-0.49054	0.711759	0.195459	-2.50968	0.0120841	0.185416		3168.27	-0.0781765	0.947254	0.175235	-0.446124	0.655507	0.973827		3168.27	0.28656	1.21973	0.175076	1.63678	0.101677
F40F8.9	glb-4	1888.77	1709.47	1952.56	1145.06	1094.39	1297.33	1167.05	1222.43	617.415	500.259	668.985	446.484	503.413	700.429	854.426	660.041	1274		1041.32	-0.650114	0.63723	0.223547	-2.90817	0.00363546	0.0332743		1041.32	-0.631063	0.645701	0.250127	-2.52297	0.0116368	0.185416		1041.32	-0.114018	0.924011	0.226782	-0.502764	0.61513	0.973655		1041.32	0.642689	1.56124	0.225752	2.84689	0.00441491
D1046.2	lin-10	2010.35	1933.54	2081.13	1358.1	1418.89	1322.04	1500.5	1610.59	52.4407	43.864	54.7352	37.9986	40.0948	52.3943	82.1754	45.6745	103.004		808.677	-0.555763	0.680297	0.191085	-2.90846	0.00363219	0.0332743		808.677	-0.368641	0.774512	0.213618	-1.7257	0.0844013	0.357002		808.677	-0.208208	0.865612	0.255395	-0.815239	0.414935	0.973655		808.677	0.612973	1.52941	0.242786	2.52475	0.0115781
F39B2.2	mau-2	2459.34	2210.34	2650.26	1601.7	1579.02	1583.7	1559.46	1784.44	2248.02	1844.38	2504.44	1865.73	1850.6	2427.6	2703.87	2312.38	4353.28		2208.15	-0.619536	0.65088	0.213026	-2.90827	0.00363435	0.0332743		2208.15	-0.545413	0.685195	0.238264	-2.28911	0.0220727	0.215627		2208.15	-0.10246	0.931443	0.212863	-0.481344	0.630272	0.973655		2208.15	0.506399	1.4205	0.212616	2.38176	0.0172303
Y38F2AL.1	C10A4.2	1882.37	2031.89	1597.73	2954.87	2398.75	2754.78	2265.99	2301.62	2279.69	2938.89	3340.06	3657.37	2397.67	3549.03	2321.7	2198.64	2729.61		2564.74	0.556943	1.47115	0.191492	2.90844	0.00363237	0.0332743		2564.74	0.313857	1.24303	0.214251	1.4649	0.142947	0.455094		2564.74	0.166457	1.1223	0.191027	0.871379	0.383547	0.973655		2564.74	-0.23913	0.847256	0.191204	-1.25065	0.211061
F53E10.6	C10A4.3	1017.44	871.971	909.998	645.021	658.542	691.667	688.236	721.648	470.977	491.903	551.001	417.985	463.318	500.963	682.155	545.407	884.571		659.577	-0.488306	0.712861	0.167975	-2.90702	0.00364886	0.0333128		659.577	-0.40454	0.755477	0.188014	-2.15165	0.0314249	0.245876		659.577	-0.130195	0.913708	0.171166	-0.760638	0.446873	0.973655		659.577	0.48135	1.39605	0.16979	2.83497	0.00458293
K03B4.2	C10A4.6	2141.52	1805.79	2321.34	1339.36	1477.21	1227.8	1519.81	1771.32	709.434	604.697	849.003	570.929	601.423	659.985	896.009	725.418	1422.18		1214.31	-0.632386	0.645109	0.217761	-2.90404	0.00368379	0.0333128		1214.31	-0.34469	0.787477	0.243355	-1.41641	0.156655	0.470796		1214.31	-0.238807	0.847446	0.220587	-1.0826	0.278986	0.973655		1214.31	0.493363	1.40772	0.219657	2.24606	0.0247003
Y49F6B.2	C10B5.3	784.941	745.231	831.258	523.71	538.711	612.986	600.808	614.494	60.3563	40.7309	59.6005	32.2988	47.2228	58.8287	68.3145	63.586	83.1262		339.188	-0.494791	0.709664	0.170362	-2.90435	0.00368014	0.0333128		339.188	-0.373464	0.771927	0.190598	-1.95943	0.050062	0.290702		339.188	-0.210822	0.864045	0.233896	-0.901352	0.367401	0.973655		339.188	0.423422	1.3411	0.223345	1.89582	0.0579843
F09E8.2	pezo-1	1353.38	1239.01	1320.64	1007.97	1093.33	1060.37	1188.4	1139.33	1253.63	1145.69	1168.9	1281.5	1264.32	1195.88	1386.09	1252.91	1461.94		1224.31	-0.30765	0.807957	0.105942	-2.90394	0.00368493	0.0333128		1224.31	-0.164198	0.892424	0.118424	-1.38653	0.165586	0.481449		1224.31	0.0681758	1.04839	0.105695	0.645022	0.518913	0.973655		1224.31	0.200374	1.149	0.105506	1.89917	0.0575424
F33A8.4	daf-15	1646.67	1433.68	1606.7	1097.72	1209.98	1118.93	1249.4	1315.37	498.682	408.353	488.968	461.683	388.474	484.418	544.536	456.745	667.72		886.942	-0.451991	0.731033	0.155607	-2.9047	0.00367602	0.0333128		886.942	-0.284914	0.820791	0.173953	-1.63788	0.101447	0.388189		886.942	-0.0649413	0.955984	0.161887	-0.401152	0.688308	0.974801		886.942	0.257955	1.19578	0.161033	1.60188	0.109183
T26A5.9	C10C5.7	16593.6	14591.3	17716.6	11204	10078.6	10466.5	10476	11574.8	5244.07	6256.89	7083.95	5563	5405.68	7071.4	5773.07	6432.94	10904		9555.08	-0.62316	0.649247	0.214571	-2.90421	0.00368177	0.0333128		9555.08	-0.564091	0.676381	0.239914	-2.35123	0.0187117	0.206379		9555.08	-0.0428505	0.970735	0.214848	-0.199445	0.841914	0.991268		9555.08	0.314501	1.24358	0.214796	1.46418	0.143144
C50C3.8	kin-4	7667.04	7002.13	8332.51	5446.19	6052.01	4947.8	6185.99	6888.46	893.471	713.312	885.493	827.42	691.413	873.239	1117.78	763.032	860.175		3538.09	-0.484071	0.714957	0.166705	-2.90376	0.00368712	0.0333128		3538.09	-0.230054	0.852603	0.186351	-1.23452	0.217009	0.537059		3538.09	-0.0591504	0.959829	0.171108	-0.345691	0.729575	0.975883		3538.09	0.136908	1.09955	0.170832	0.801419	0.422889
Y105E8A.8	npr-3	1002.51	957.14	1213	768.305	812.308	674.284	962.717	960.011	609.5	507.569	644.659	498.732	515.887	491.771	694.036	456.745	632.482		729.509	-0.493148	0.710473	0.169886	-2.90282	0.00369817	0.0333514		729.509	-0.137682	0.908979	0.189502	-0.726544	0.467506	0.759803		729.509	-0.225296	0.85542	0.172707	-1.3045	0.192064	0.973655		729.509	0.0174617	1.01218	0.172169	0.101422	0.919216
T10E9.2	catp-8	2035.94	1935.57	2235.62	1469.54	1565.23	1420.85	1618.42	1747.26	708.444	544.123	611.818	550.98	564.892	644.358	827.695	525.704	662.299		1156.99	-0.478445	0.717751	0.165068	-2.89847	0.00374984	0.0337554		1156.99	-0.298156	0.813291	0.184525	-1.61581	0.106135	0.393248		1156.99	-0.0832902	0.943903	0.169524	-0.491317	0.623202	0.973655		1156.99	0.11143	1.0803	0.169148	0.658773	0.510042
Y110A7A.16	C10C6.7	1430.17	1447.88	1699.39	1111.53	1244.97	1051.22	1319.54	1465.16	616.426	519.057	513.294	539.58	489.157	500.044	615.821	496.15	459.001		912.847	-0.426175	0.744232	0.147118	-2.89682	0.00376961	0.0337965		912.847	-0.132294	0.912379	0.164234	-0.805523	0.420518	0.726526		912.847	-0.110119	0.926512	0.152291	-0.723082	0.46963	0.973655		912.847	-0.07154	0.951622	0.152224	-0.469965	0.63838
R10E11.3	hda-4	982.243	921.653	1041.56	735.758	715.807	731.923	760.414	835.362	555.08	472.06	578.976	445.534	428.569	454.084	561.367	453.162	669.527		667.24	-0.431824	0.741324	0.149081	-2.89657	0.00377266	0.0337965		667.24	-0.299506	0.812531	0.166735	-1.7963	0.0724466	0.336714		667.24	-0.273559	0.827276	0.152986	-1.78813	0.0737551	0.973655		667.24	0.0689136	1.04893	0.152026	0.453302	0.650331
Y45G5AM.7	C10E2.5	3402.12	2924.14	3729.7	1991.28	2162.27	2036.58	2477.45	2444.86	843.999	467.883	513.294	445.534	533.707	415.478	928.681	528.391	511.407		1550.4	-0.70004	0.615555	0.241695	-2.89637	0.00377503	0.0337965		1550.4	-0.445684	0.734236	0.270183	-1.64956	0.0990323	0.384107		1550.4	-0.388807	0.763761	0.245926	-1.58099	0.11388	0.973655		1550.4	0.107535	1.07739	0.245133	0.438678	0.660895
Y57E12AL.6	cpg-4	4488.88	3945.16	5192.87	2489.35	2561	2378.75	2746.84	3057.16	1506.93	1229.24	1924.25	1110.51	1112.85	1797.03	1928.65	1421.28	4065.05		2526.81	-0.875221	0.54517	0.302424	-2.89402	0.00380343	0.0339601		2526.81	-0.646396	0.638875	0.338111	-1.91179	0.0559036	0.306522		2526.81	-0.212917	0.862791	0.303294	-0.702015	0.48267	0.973655		2526.81	0.670231	1.59133	0.302939	2.21243	0.0269369
ZK856.10	acy-2	556.711	500.876	641.882	373.797	349.95	393.409	427.987	451.577	136.544	123.237	142.311	95.9465	91.7726	134.203	124.748	123.59	214.14		287.217	-0.604999	0.657472	0.209073	-2.89372	0.00380712	0.0339601		287.217	-0.365456	0.776223	0.233504	-1.5651	0.117561	0.413178		287.217	-0.320018	0.80106	0.228402	-1.40112	0.161179	0.973655		287.217	0.204067	1.15194	0.224495	0.909002	0.363349
Y73B6BL.30	mcp-1	1113.42	1063.6	1164.16	850.166	718.988	835.307	778.713	806.934	796.505	797.907	867.248	662.126	684.285	883.35	944.522	911.698	1295.68		892.625	-0.474338	0.719797	0.164213	-2.88856	0.00387011	0.0343971		892.625	-0.490406	0.711825	0.184023	-2.66491	0.00770079	0.164769		892.625	-0.142368	0.906031	0.165067	-0.862483	0.388422	0.973655		892.625	0.357113	1.28086	0.164324	2.17323	0.0297632
T18H9.1	pcm-1	56.5243	54.7516	38.8718	71.0115	106.045	81.4265	57.946	45.9231	1118.08	1445.42	1127.54	1284.35	1635.87	1303.42	867.297	1487.55	904.449		687.441	0.783065	1.72078	0.271067	2.88883	0.00386678	0.0343971		687.441	0.0572785	1.0405	0.315346	0.181637	0.855868	0.955509		687.441	0.19443	1.14427	0.228809	0.849748	0.395465	0.973655		687.441	-0.179324	0.883117	0.229116	-0.782678	0.433816
C17E4.11	fut-8	241.028	241.313	305.991	180.488	138.92	187.555	184.004	218.681	2929.75	2482.49	2964.21	2224.82	2353.12	2865.14	4048.38	2830.03	5009.26		1729.72	-0.635651	0.64365	0.220243	-2.88614	0.00390001	0.0345379		1729.72	-0.385245	0.765649	0.24567	-1.56814	0.116848	0.413173		1729.72	-0.170385	0.888606	0.205621	-0.828634	0.407311	0.973655		1729.72	0.50508	1.4192	0.205392	2.45911	0.0139283
C27H6.8	pnk-1	2986.19	2736.57	3332.01	2026.79	1775.2	1935.94	2055.56	2208.68	383.906	367.622	424.502	320.138	338.579	387.902	405.927	322.408	738.197		1338.01	-0.658117	0.633705	0.228003	-2.88645	0.00389618	0.0345379		1338.01	-0.501462	0.706391	0.254931	-1.96705	0.0491777	0.287206		1338.01	-0.167657	0.890288	0.234814	-0.713997	0.475229	0.973655		1338.01	0.319257	1.24769	0.233725	1.36595	0.171954
B0041.8	C10G11.6	2740.9	2452.67	3375.86	1725.97	1615.07	1652.32	1724.15	1934.24	1086.41	851.171	1061.86	721.974	833.973	953.209	1477.18	936.774	2641.97		1634.45	-0.779195	0.582692	0.270248	-2.88326	0.00393587	0.0347304		1634.45	-0.64308	0.640344	0.302186	-2.12809	0.0333292	0.249706		1634.45	-0.257396	0.836596	0.271824	-0.946922	0.343678	0.973655		1634.45	0.753369	1.68572	0.271124	2.77869	0.00545784
H38K22.3	C10G11.8	1351.25	1232.93	1347.55	995.147	1018.04	929.542	1110.12	1133.86	1248.68	1335.76	1431.63	1269.15	1237.59	1295.15	1464.31	1395.31	2012.2		1282.84	-0.418194	0.748361	0.14504	-2.8833	0.0039353	0.0347304		1282.84	-0.224145	0.856102	0.162067	-1.38304	0.166652	0.482682		1282.84	-0.0787119	0.946903	0.144432	-0.544977	0.585769	0.973655		1282.84	0.279191	1.21351	0.144062	1.93799	0.0526243
F13G3.9	egal-1	1307.52	1220.76	1366.49	947.806	781.555	855.435	817.343	998.28	382.916	394.776	453.694	359.087	336.797	453.165	502.953	465.7	825.841		733.537	-0.59138	0.663708	0.205223	-2.88165	0.003956	0.0348454		733.537	-0.516318	0.699154	0.229618	-2.2486	0.0245382	0.226149		733.537	-0.0991074	0.93361	0.210407	-0.471027	0.637621	0.973655		733.537	0.5444	1.45841	0.209004	2.60474	0.0091944
C50F4.12	ncx-2	867.062	806.066	1018.64	546.394	627.789	568.155	665.871	699.78	302.771	307.048	372.199	267.89	267.299	299.659	467.311	351.962	740.004		539.759	-0.627774	0.647174	0.217973	-2.88006	0.00397597	0.0349587		539.759	-0.394126	0.76095	0.243568	-1.61813	0.105634	0.39282		539.759	-0.233113	0.850797	0.223897	-1.04116	0.297799	0.973655		539.759	0.668341	1.58924	0.221533	3.01689	0.00255381
F26H11.5	ceh-34	439.397	388.331	508.323	298.84	270.416	299.174	310.062	325.835	16.8206	27.1539	24.3267	28.499	30.2939	27.576	12.8708	38.5098	18.0709		180.265	-0.621244	0.65011	0.215769	-2.87921	0.00398677	0.034991		180.265	-0.486377	0.713815	0.24144	-2.01449	0.0439585	0.276509		180.265	0.346293	1.27129	0.312689	1.10747	0.268092	0.973655		180.265	0.0438478	1.03086	0.321258	0.136488	0.891436
C34G6.7	ceh-33	3313.6	3068.12	3087.81	2492.31	2600.23	2251.58	2478.46	2682.13	1730.54	1608.35	1702.87	1437.3	1407.77	1463.36	1958.35	1629.06	2235.37		2185.13	-0.366838	0.77548	0.127606	-2.87477	0.00404323	0.0354233		2185.13	-0.290829	0.817432	0.142736	-2.03753	0.0415967	0.271062		2185.13	-0.226765	0.854549	0.129111	-1.75636	0.0790273	0.973655		2185.13	0.207751	1.15489	0.128676	1.61453	0.106412
Y73E7A.6	viln-1	1003.57	1004.79	1014.65	631.213	620.366	613.901	633.34	788.346	251.32	200.521	274.892	199.493	196.019	290.467	306.92	275.838	575.559		522.424	-0.696461	0.617084	0.24275	-2.86905	0.00411709	0.0355532		522.424	-0.503629	0.70533	0.271387	-1.85576	0.0634879	0.322219		522.424	-0.0823574	0.944513	0.251026	-0.328084	0.742848	0.975883		522.424	0.673883	1.59536	0.248782	2.70873	0.00675408
VF39H2L.1	kca-1	925.719	781.732	952.857	600.639	588.552	670.625	678.07	666.978	613.457	449.084	516.943	414.185	484.702	457.761	734.628	549.885	878.246		644.945	-0.516093	0.699263	0.179854	-2.86951	0.00411108	0.0355532		644.945	-0.39892	0.758426	0.201211	-1.9826	0.0474119	0.28316		644.945	-0.219669	0.858762	0.182423	-1.20418	0.228521	0.973655		644.945	0.452851	1.36874	0.181002	2.50192	0.0123523
Y51F10.10	mlst-8	1085.69	906.444	1019.64	575.982	644.756	669.71	756.348	773.038	541.228	510.702	541.27	416.085	409.858	502.802	634.632	493.463	1143.89		683.855	-0.671783	0.62773	0.234186	-2.86858	0.00412316	0.0355532		683.855	-0.392669	0.761719	0.261638	-1.50081	0.133404	0.439843		683.855	-0.26182	0.834035	0.23644	-1.10734	0.268146	0.973655		683.855	0.512256	1.42628	0.235189	2.17806	0.0294019
H10E21.5	let-502	215.432	215.965	219.277	359.003	317.076	274.471	290.747	270.071	267.151	315.403	261.512	341.038	265.517	278.517	193.063	270.465	171.674		266.258	0.546201	1.46024	0.190207	2.87161	0.0040838	0.0355532		266.258	0.370797	1.29307	0.213577	1.73613	0.0825415	0.355674		266.258	0.0673458	1.04779	0.188595	0.357092	0.721023	0.974801		266.258	-0.409905	0.752673	0.190912	-2.14708	0.0317865
D1081.6	asp-9	951.315	738.133	1011.66	573.023	582.19	529.729	556.078	673.538	212.731	123.237	175.153	123.496	142.559	141.557	272.268	151.353	302.688		427.101	-0.680985	0.623739	0.237255	-2.87027	0.00410124	0.0355532		427.101	-0.550582	0.682745	0.26538	-2.07469	0.0380149	0.26094		427.101	-0.326713	0.797351	0.251757	-1.29773	0.19438	0.973655		427.101	0.505716	1.41983	0.24769	2.04173	0.0411781
T01G9.3	C11D2.4	1052.63	1094.02	916.975	1495.19	1325.57	1330.27	1149.77	1145.89	1531.66	1907.04	1996.01	2421.46	1927.23	2186.77	1451.44	1670.25	1295.68		1523.4	0.438328	1.35503	0.1527	2.87052	0.004098	0.0355532		1523.4	0.16873	1.12407	0.171202	0.985559	0.32435	0.649702		1523.4	0.266412	1.20281	0.151108	1.76306	0.0778901	0.973655		1523.4	-0.298553	0.813067	0.151587	-1.96952	0.0488932
C53A5.17	del-8	536.448	457.278	614.971	352.099	324.499	385.175	412.738	379.412	365.106	356.134	391.661	303.039	305.612	392.498	435.629	330.468	613.507		409.193	-0.598959	0.66023	0.208707	-2.86986	0.00410655	0.0355532		409.193	-0.436971	0.738684	0.233389	-1.87229	0.0611666	0.318176		409.193	-0.152227	0.89986	0.210323	-0.723778	0.469202	0.973655		409.193	0.310429	1.24008	0.209106	1.48455	0.137662
Y34D9B.1	C11E4.6	840.399	968.293	830.261	1319.63	1409.34	1003.65	1328.69	1399.56	1541.56	1453.78	1862.21	1940.78	1510.24	1814.5	1744.49	1457.11	1314.66		1396.42	0.499767	1.41399	0.173954	2.87299	0.00406609	0.0355532		1396.42	0.63289	1.55067	0.194266	3.25785	0.00112259	0.0983518		1396.42	0.116646	1.08421	0.172419	0.676529	0.498705	0.973655		1396.42	-0.104917	0.929859	0.172607	-0.607835	0.543297
D2030.8	C11G10.1	2327.1	2214.4	2386.13	1664.83	1849.43	1580.95	1813.61	2123.39	0.989447	0	0	0	0	0	0	0	0.903546		938.925	-0.44341	0.735394	0.154401	-2.87181	0.00408132	0.0355532		938.925	-0.230431	0.85238	0.172558	-1.33538	0.181751	0.502317		938.925	-1.19246	0.437556	1.67281	-0.712851	0.475938	0.973655		938.925	-0.216577	0.860605	1.67281	-0.129469	0.896986
K08D12.3	C11H1.3	7596.65	6800.36	8139.15	5382.08	5666.01	4657.78	5843.4	6413.92	2057.06	1973.88	2486.19	2124.12	1953.96	2480.92	2649.41	2216.56	3616.89		4238.73	-0.520995	0.696891	0.181929	-2.86373	0.00418689	0.0360395		4238.73	-0.293656	0.815832	0.203383	-1.44386	0.148779	0.46183		4238.73	0.00947154	1.00659	0.183059	0.0517404	0.958736	0.999121		4238.73	0.380594	1.30188	0.182884	2.08106	0.0374282
F26D10.9	C11H1.7	2087.13	2235.69	1633.61	2952.9	2293.76	2691.65	2282.26	2100.43	7359.51	8716.4	8127.56	9450.26	8475.16	8502.59	7463.11	7255.97	7266.31		5346.72	0.414607	1.33294	0.144839	2.86254	0.00420256	0.0361111		5346.72	0.142491	1.10381	0.162206	0.878459	0.379695	0.695634		5346.72	0.126865	1.09192	0.143271	0.885491	0.375892	0.973655		5346.72	-0.138652	0.908368	0.143326	-0.96739	0.333349
F18H3.1	C11H1.9	855.33	674.256	917.972	555.271	552.497	615.73	708.568	679.005	298.813	198.432	223.806	205.193	215.621	232.557	331.672	261.509	344.251		462.97	-0.5057	0.704318	0.176739	-2.86128	0.00421928	0.0361916		462.97	-0.233732	0.850432	0.197283	-1.18475	0.236115	0.560399		462.97	-0.14405	0.904975	0.187675	-0.76755	0.442754	0.973655		462.97	0.376208	1.29793	0.185353	2.02968	0.0423891
F10G2.4	lin-41	937.45	862.845	1063.49	548.367	542.953	490.389	575.394	617.774	12.8628	13.577	14.596	7.59973	1.78199	11.0304	5.94039	8.0602	33.4312		338.091	-0.856566	0.552265	0.299425	-2.86071	0.00422698	0.0361944		338.091	-0.678238	0.624928	0.334812	-2.02573	0.0427927	0.273696		338.091	-1.01275	0.4956	0.486632	-2.08115	0.0374205	0.973655		338.091	0.224687	1.16852	0.427639	0.525413	0.599296
K05F1.5	C12D12.1	2306.83	2195.14	2410.05	1889.7	1686.12	1937.77	1835.97	1900.34	1371.37	1423.49	1365.95	1339.45	1192.15	1481.75	1364.31	1238.58	1308.33		1661.61	-0.325854	0.797826	0.113941	-2.85985	0.00423838	0.0362289		1661.61	-0.302599	0.81079	0.127566	-2.37211	0.017687	0.205487		1661.61	-0.0522448	0.964435	0.115412	-0.452681	0.650779	0.973655		1661.61	-0.0894838	0.939859	0.115488	-0.774832	0.438439
W03B1.4	glt-1	1193.41	1024.06	1252.87	846.221	918.354	806.945	957.634	1097.78	439.315	413.575	405.04	379.986	376	420.074	472.261	429.877	612.604		708.588	-0.432766	0.74084	0.151672	-2.8533	0.00432678	0.0368198		708.588	-0.1709	0.888289	0.169326	-1.00929	0.312835	0.637571		708.588	-0.0976376	0.934562	0.15814	-0.617411	0.536963	0.973655		708.588	0.267727	1.20391	0.157026	1.70498	0.0881973
ZK430.7	sox-4	1935.69	1713.52	2134.96	1403.46	1602.35	1320.21	1722.11	1843.48	1540.57	1295.03	1353.78	1202.66	1217.1	1472.56	1708.85	1376.5	1507.11		1550	-0.419402	0.747735	0.147	-2.85306	0.00432998	0.0368198		1550	-0.113099	0.9246	0.164138	-0.689047	0.490794	0.775607		1550	-0.106338	0.928943	0.147631	-0.720295	0.471344	0.973655		1550	0.132073	1.09587	0.147392	0.896069	0.370216
Y110A7A.6	fubl-1	3033.12	2957.6	3074.86	2332.53	2374.36	2268.05	2394.08	2483.13	729.223	645.427	782.105	649.777	568.456	602.075	848.486	608.993	686.695		1590.53	-0.378274	0.769357	0.13258	-2.85317	0.00432857	0.0368198		1590.53	-0.309414	0.80697	0.148307	-2.0863	0.0369513	0.259319		1590.53	-0.24422	0.844272	0.138364	-1.76505	0.0775557	0.973655		1590.53	-0.00861135	0.994049	0.137824	-0.0624808	0.95018
F46F11.5	rop-1	5362.34	4681.27	5330.42	3741.91	3759.31	4274.43	3859	3671.66	5197.57	5843.31	5789.76	4953.12	5324.59	6120.94	5330.51	6733.85	6559.74		5090.22	-0.384587	0.765998	0.134848	-2.852	0.00434451	0.0368796		5090.22	-0.444644	0.734765	0.150893	-2.94675	0.00321135	0.124307		5090.22	-0.0374353	0.974386	0.134616	-0.27809	0.780943	0.98217		5090.22	0.14622	1.10667	0.134568	1.08659	0.277219
T16G12.4	daf-36	3973.77	3422.99	4318.75	2604.74	2662.8	2334.83	2674.67	2999.21	1492.09	1071.53	1504.61	1135.21	1099.49	1558.96	1834.59	1243.06	2313.98		2249.72	-0.623952	0.648891	0.218979	-2.84936	0.00438067	0.0369314		2249.72	-0.461086	0.726439	0.244834	-1.88326	0.0596651	0.314201		2249.72	-0.100683	0.932592	0.22036	-0.456901	0.647742	0.973655		2249.72	0.406422	1.3254	0.220029	1.84713	0.0647277
C55A6.9	C12D8.9	4124.14	3515.26	4344.67	2730	2994.72	2687.99	3190.08	3074.66	817.284	624.54	705.476	639.327	682.503	566.226	1018.78	606.306	858.368		1951.78	-0.510534	0.701963	0.179103	-2.8505	0.004365	0.0369314		1951.78	-0.350814	0.784141	0.200245	-1.75193	0.0797866	0.351308		1951.78	-0.185846	0.879133	0.183627	-1.01208	0.311499	0.973655		1951.78	0.209003	1.15589	0.182987	1.14217	0.253382
Y42G9A.6	C13A10.1	652.696	564.753	748.531	415.22	492.051	384.26	503.215	555.45	569.922	547.256	650.74	532.931	455.299	516.59	576.218	516.748	950.53		566.612	-0.606845	0.656631	0.212951	-2.84969	0.00437621	0.0369314		566.612	-0.308257	0.807617	0.237695	-1.29686	0.19468	0.517714		566.612	-0.232101	0.851394	0.212648	-1.09148	0.275061	0.973655		566.612	0.209731	1.15647	0.21188	0.989857	0.322244
Y47D3B.1	C13A10.2	582.307	588.073	439.55	767.319	652.18	760.285	651.638	556.544	636.215	796.863	738.317	816.97	732.399	806.137	682.155	612.575	667.72		675.72	0.43801	1.35473	0.153673	2.85028	0.00436811	0.0369314		675.72	0.171617	1.12632	0.172704	0.993704	0.320367	0.645482		675.72	0.117699	1.085	0.152309	0.772766	0.439661	0.973655		675.72	-0.14575	0.903909	0.152876	-0.953389	0.340393
F42A10.5	C13B4.1	4037.76	3645.04	4203.13	2719.15	3407.24	2317.45	3175.85	3485.78	1870.06	1595.81	1867.08	1481	1582.41	1704.19	2313.78	1638.01	2334.76		2551.68	-0.493505	0.710297	0.17365	-2.84195	0.00448389	0.0377368		2551.68	-0.250382	0.840674	0.194097	-1.28998	0.197056	0.520009		2551.68	-0.161572	0.89405	0.174802	-0.924311	0.355324	0.973655		2551.68	0.237295	1.17878	0.174534	1.35959	0.173959
ZC308.4	usp-14	3826.59	3364.18	4265.93	2339.43	2481.46	2187.54	2608.59	2830.83	193.932	128.459	207.994	121.596	142.559	167.294	236.626	137.919	340.637		1504.8	-0.709076	0.611712	0.249683	-2.83991	0.00451267	0.0377434		1504.8	-0.48973	0.712159	0.279137	-1.75444	0.0793547	0.350703		1504.8	-0.29623	0.814378	0.265613	-1.11527	0.264735	0.973655		1504.8	0.43248	1.34955	0.262333	1.64859	0.0992319
Y92H12BR.2	copd-1	3218.69	2700.07	2911.4	1904.49	1798.53	1976.19	1933.57	2093.87	1831.47	1305.48	1708.95	1176.06	1290.16	1516.68	1865.28	1324.56	2819.97		1963.26	-0.636676	0.643193	0.224145	-2.84046	0.00450479	0.0377434		1963.26	-0.54762	0.684148	0.250667	-2.18465	0.0289144	0.239759		1963.26	-0.282897	0.821939	0.224908	-1.25784	0.208451	0.973655		1963.26	0.310598	1.24022	0.224555	1.38317	0.166612
Y34B4A.2	cal-1	985.443	848.65	967.807	694.335	686.114	643.177	698.402	763.197	283.971	181.722	231.104	189.043	184.436	229.8	285.139	231.059	285.52		493.466	-0.469568	0.722181	0.165357	-2.83971	0.00451539	0.0377434		493.466	-0.354005	0.782409	0.184991	-1.91363	0.0556674	0.306042		493.466	-0.209167	0.865037	0.178797	-1.16986	0.242058	0.973655		493.466	0.200594	1.14917	0.176658	1.13549	0.256169
F18C12.3	C13C12.2	1117.69	989.585	1206.02	684.472	779.434	849.031	850.891	875.818	356.201	300.782	277.325	317.289	329.669	228.88	407.907	340.32	274.678		599.176	-0.518392	0.698149	0.182537	-2.83993	0.00451228	0.0377434		599.176	-0.355335	0.781688	0.204083	-1.74113	0.0816616	0.35478		599.176	-0.094728	0.936449	0.19074	-0.496634	0.619447	0.973655		599.176	0.128212	1.09294	0.189969	0.674912	0.499732
C55B7.5	nhr-136	2044.47	1798.69	2158.88	1122.38	1338.29	1128.99	1421.2	1541.7	301.781	223.498	276.109	199.493	212.057	246.345	327.712	223.894	615.315		892.989	-0.741712	0.598029	0.261837	-2.83272	0.00461542	0.03781		892.989	-0.433511	0.740457	0.292635	-1.48141	0.138499	0.447529		892.989	-0.284616	0.82096	0.270838	-1.05087	0.293318	0.973655		892.989	0.542332	1.45632	0.268516	2.01974	0.0434103
Y32H12A.2	C13C4.4	2667.31	2444.56	2693.12	1791.07	1882.31	1631.27	1904.08	2063.26	1225.93	835.505	1127.54	894.868	918.617	943.098	1592.02	931.401	1611.93		1597.52	-0.557234	0.679604	0.196799	-2.83149	0.00463317	0.03781		1597.52	-0.391295	0.762445	0.22003	-1.77837	0.0753425	0.343892		1597.52	-0.210166	0.864438	0.198672	-1.05786	0.290121	0.973655		1597.52	0.37475	1.29661	0.1981	1.89172	0.0585288
ZC328.4	spin-1	1863.17	1654.72	1991.43	1223.96	1215.28	1185.72	1292.09	1417.05	519.46	346.735	474.371	303.039	351.053	417.316	702.946	391.368	685.791		943.265	-0.603936	0.657957	0.213286	-2.83158	0.00463186	0.03781		943.265	-0.439134	0.737577	0.238472	-1.84145	0.0655552	0.32585		943.265	-0.323125	0.799337	0.2191	-1.47478	0.140271	0.973655		943.265	0.408718	1.32751	0.217497	1.87919	0.060219
Y66H1A.3	C13C4.6	458.593	425.846	534.238	335.332	312.834	397.983	348.693	314.901	227.573	215.142	225.022	225.142	227.204	281.275	264.347	261.509	287.328		314.292	-0.438294	0.738007	0.154486	-2.83711	0.00455241	0.03781		314.292	-0.510967	0.701752	0.174104	-2.93484	0.00333718	0.126476		314.292	0.13586	1.09875	0.162422	0.836466	0.402893	0.973655		314.292	0.284544	1.21802	0.161708	1.75962	0.078473
R186.8	srr-6	557.778	534.335	606.998	365.907	335.104	490.389	394.439	394.72	254.288	225.586	279.758	222.292	240.569	304.255	268.308	294.645	344.251		359.625	-0.510755	0.701855	0.180322	-2.83245	0.00461925	0.03781		359.625	-0.521506	0.696644	0.202387	-2.57678	0.00997252	0.180341		359.625	0.0156234	1.01089	0.187084	0.0835101	0.933446	0.994546		359.625	0.25805	1.19586	0.186108	1.38656	0.165577
W01A8.4	kxd-1	2605.45	2601.72	2902.43	1728.93	1639.46	1997.24	1693.65	1900.34	1842.35	1914.35	2124.94	1735.59	1643.89	2509.41	1874.19	2039.23	3239.21		2117.2	-0.595778	0.661688	0.21044	-2.83111	0.00463874	0.03781		2117.2	-0.589154	0.664733	0.23542	-2.50256	0.0123298	0.185416		2117.2	0.00190413	1.00132	0.210588	0.00904198	0.992786	1		2117.2	0.282501	1.2163	0.210458	1.34232	0.179494
ZK809.2	soap-1	305.018	271.73	359.813	211.062	188.761	220.492	197.22	228.522	219.657	248.563	262.729	229.892	269.972	369.518	227.715	310.766	340.637		262.474	-0.593761	0.662613	0.209338	-2.83638	0.00456277	0.03781		262.474	-0.553214	0.6815	0.235012	-2.35398	0.0185737	0.206379		262.474	0.251618	1.19054	0.208616	1.20613	0.227767	0.973655		262.474	0.268497	1.20455	0.208609	1.28709	0.198064
F40E10.6	C13F10.6	2280.17	2154.58	2193.76	2931.2	3199.39	2417.18	2979.64	3143.54	3580.81	4019.82	4005.4	4196	3903.46	4241.18	3240.48	3859.04	3306.07		3273.63	0.366614	1.28932	0.1293	2.83536	0.00457734	0.03781		3273.63	0.470552	1.38564	0.144485	3.25676	0.00112691	0.0983518		3273.63	0.0886278	1.06336	0.128474	0.68985	0.490288	0.973655		3273.63	-0.157332	0.896682	0.128594	-1.22348	0.221149
T13H5.5	C13F10.7	1107.02	983.502	1125.29	719.978	753.983	876.478	783.796	880.192	624.341	675.715	644.659	608.928	564.001	725.248	774.231	583.021	823.13		779.618	-0.451857	0.731101	0.159411	-2.83453	0.00458929	0.03781		779.618	-0.365764	0.776058	0.1784	-2.05025	0.0403405	0.266964		779.618	-0.0349789	0.976046	0.161375	-0.216755	0.828399	0.991158		779.618	0.164808	1.12102	0.160999	1.02366	0.305997
ZK470.2	hot-6	480.99	486.681	444.534	706.17	814.429	530.644	680.103	649.483	1110.16	1283.54	1247.96	1351.8	1303.53	1274.01	984.125	1387.25	867.404		917.813	0.537802	1.45176	0.18983	2.83307	0.00461039	0.03781		917.813	0.498147	1.4124	0.212286	2.34659	0.0189462	0.20768		917.813	0.109822	1.07909	0.186086	0.590166	0.55508	0.973655		917.813	-0.168822	0.889569	0.186382	-0.905784	0.36505
F26A3.1	ceh-16	728.417	669.187	789.396	569.078	517.502	625.794	596.742	575.132	491.755	458.483	468.29	425.585	454.408	429.266	549.486	491.672	487.915		548.712	-0.352016	0.783489	0.124338	-2.83113	0.00463843	0.03781		548.712	-0.315109	0.80379	0.139485	-2.25909	0.0238777	0.224444		548.712	-0.115795	0.922873	0.127807	-0.90602	0.364925	0.973655		548.712	0.10735	1.07725	0.127035	0.845045	0.398086
ZK1236.1	tsp-6	386.072	328.51	378.751	293.909	273.597	268.982	316.161	295.22	255.277	231.853	229.888	249.841	220.967	215.093	219.794	218.521	229.501		271.29	-0.386221	0.765131	0.136384	-2.83187	0.00462773	0.03781		271.29	-0.252927	0.839192	0.152591	-1.65755	0.0974083	0.380819		271.29	-0.0659661	0.955305	0.141846	-0.465054	0.641893	0.973655		271.29	-0.103817	0.930568	0.142209	-0.730026	0.465374
ZK563.5	C14A11.2	1636.01	1410.36	1731.29	1240.73	1220.58	1206.76	1146.72	1250.86	355.212	313.314	287.056	270.74	258.389	299.659	293.059	279.42	343.347		796.676	-0.381308	0.767741	0.134467	-2.8357	0.00457249	0.03781		796.676	-0.409917	0.752667	0.150684	-2.72037	0.00652084	0.154355		796.676	-0.207735	0.865895	0.147435	-1.409	0.158835	0.973655		796.676	-0.0632442	0.957109	0.146759	-0.430939	0.666512
Y92H12A.2	C14A11.5	299.686	326.482	294.03	466.506	436.907	387.004	422.904	402.373	590.7	666.315	578.976	679.225	762.693	577.257	604.93	686.908	465.326		508.719	0.487336	1.40185	0.171824	2.83626	0.00456453	0.03781		508.719	0.428022	1.34539	0.192338	2.22536	0.0260571	0.229761		508.719	0.13705	1.09965	0.166694	0.822162	0.410985	0.973655		508.719	-0.0636524	0.956839	0.167152	-0.380806	0.703347
K03H1.5	C14A11.6	271.957	267.675	212.3	355.058	331.922	322.046	368.008	277.725	1457.46	1437.07	1498.53	1481.95	1455	1378.8	1633.61	1402.47	1409.53		915.359	0.424909	1.34249	0.149999	2.83276	0.00461484	0.03781		915.359	0.367612	1.29022	0.168126	2.18652	0.0287772	0.239759		915.359	-0.0255261	0.982462	0.136312	-0.187263	0.851455	0.991329		915.359	0.0170373	1.01188	0.136281	0.125016	0.900511
C17D12.2	ssr-2	187.703	265.647	190.372	340.264	330.862	329.365	375.124	306.154	470.977	614.096	641.01	825.52	611.224	605.752	477.211	525.704	312.627		435.86	0.635908	1.55392	0.224687	2.83019	0.00465203	0.0378555		435.86	0.666953	1.58772	0.250862	2.65864	0.00784571	0.165461		435.86	0.243354	1.18374	0.217623	1.11823	0.263467	0.973655		435.86	-0.391316	0.762434	0.218845	-1.78809	0.0737609
B0393.2	taf-13	2937.13	2727.44	3312.07	2188.54	2312.85	1986.26	2587.24	2524.67	610.489	579.631	572.895	625.077	597.859	441.215	631.662	456.745	452.676		1502.61	-0.468629	0.722651	0.165623	-2.82949	0.00466218	0.0378754		1502.61	-0.227361	0.854196	0.185102	-1.2283	0.219335	0.540374		1502.61	-0.0835768	0.943715	0.171187	-0.488219	0.625395	0.973655		1502.61	-0.195265	0.873412	0.171495	-1.1386	0.254868
C05C8.1	C14A4.12	478.857	433.957	522.277	296.868	267.235	290.025	303.962	302.874	174.143	160.835	161.773	101.646	128.303	175.567	232.665	173.742	429.184		272.583	-0.748458	0.595239	0.264594	-2.8287	0.00467377	0.0379069		272.583	-0.656826	0.634272	0.296232	-2.21727	0.0266044	0.231809		272.583	-0.292721	0.816361	0.27454	-1.06622	0.286323	0.973655		272.583	0.750292	1.68213	0.270124	2.77759	0.00547639
ZK688.9	C14A4.13	1217.94	1084.89	1468.16	794.934	766.709	722.774	798.028	865.978	198.879	190.077	209.21	179.544	155.033	214.173	202.963	210.461	472.554		573.665	-0.723209	0.605748	0.256186	-2.82299	0.00475784	0.0382506		573.665	-0.595414	0.661854	0.286518	-2.0781	0.0377001	0.260636		573.665	-0.124191	0.917519	0.267251	-0.464696	0.642149	0.973655		573.665	0.567937	1.4824	0.264794	2.14483	0.0319668
F42H10.7	srv-2	2078.6	1827.08	1874.82	1380.78	1479.33	1290.93	1474.06	1610.59	679.75	555.611	604.52	562.38	538.162	541.408	828.685	563.318	939.687		1107.63	-0.477831	0.718057	0.169284	-2.82265	0.00476284	0.0382506		1107.63	-0.321145	0.800434	0.189268	-1.69677	0.0897393	0.366624		1107.63	-0.16456	0.892201	0.173735	-0.947191	0.343541	0.973655		1107.63	0.341229	1.26684	0.172764	1.97512	0.0482547
B0546.1	dap-3	4869.62	4270.63	5032.4	2808.9	2948.06	3310.12	3181.95	3270.38	2206.47	2059.52	2339.02	1716.59	1733.88	2625.23	2384.08	2238.05	4269.25		3015.54	-0.644361	0.639776	0.22809	-2.82503	0.00472768	0.0382506		3015.54	-0.550261	0.682897	0.255051	-2.15746	0.0309701	0.245441		3015.54	-0.120444	0.919905	0.228702	-0.526641	0.598443	0.973655		3015.54	0.428974	1.34628	0.228488	1.87744	0.0604575
E01A2.5	crn-5	398.87	370.081	499.353	262.348	257.69	268.067	282.614	348.797	307.718	264.228	325.978	269.79	245.024	356.649	324.741	274.942	562.005		330.523	-0.686483	0.621367	0.243105	-2.82381	0.00474565	0.0382506		330.523	-0.421882	0.74645	0.271431	-1.55428	0.120117	0.416511		330.523	-0.0427327	0.970814	0.243965	-0.175159	0.860955	0.992004		330.523	0.37241	1.29451	0.242872	1.53336	0.125186
B0432.3	C14A4.6	853.197	813.163	936.909	644.035	574.766	702.646	658.754	651.67	378.958	432.374	453.694	378.086	372.436	511.994	446.519	440.624	510.503		574.137	-0.437581	0.738372	0.154988	-2.82331	0.004753	0.0382506		574.137	-0.405375	0.75504	0.173671	-2.33416	0.0195873	0.209864		574.137	-0.00172939	0.998802	0.159473	-0.0108444	0.991348	1		574.137	0.145158	1.10585	0.159056	0.912623	0.361441
Y47D3B.9	C14A4.8	3042.71	3507.15	2446.93	4352.41	4705.24	3714.51	4512.67	4849.26	347.296	295.56	319.897	329.638	303.83	284.952	402.957	322.408	255.703		1999.6	0.505464	1.41958	0.179007	2.82372	0.00474704	0.0382506		1999.6	0.642367	1.56089	0.200071	3.21069	0.00132416	0.0983518		1999.6	-0.0684614	0.953654	0.18992	-0.360475	0.718492	0.974801		1999.6	0.0257399	1.018	0.189626	0.13574	0.892027
F01F1.11	alkb-8	3266.68	2856.21	3633.01	1988.32	2060.46	1992.66	2210.08	2404.4	962.732	704.957	1003.48	788.471	737.745	840.148	1260.35	821.245	2034.78		1739.16	-0.691402	0.619252	0.245029	-2.82171	0.00477683	0.0382522		1739.16	-0.495174	0.709476	0.273944	-1.80758	0.0706726	0.335038		1739.16	-0.174611	0.886006	0.247253	-0.706207	0.48006	0.973655		1739.16	0.62415	1.5413	0.246566	2.53137	0.0113617
F42A8.3	C14B1.2	1454.7	1341.42	1746.24	974.436	954.409	1009.14	960.684	1111.99	5762.54	5798.4	4915.22	6489.22	6020.46	4250.38	6352.26	4914.93	3234.69		3370.07	-0.628601	0.646803	0.222782	-2.82159	0.0047786	0.0382522		3370.07	-0.547133	0.684379	0.249214	-2.19543	0.0281327	0.239759		3370.07	0.0245878	1.01719	0.220712	0.111402	0.911298	0.994499		3370.07	-0.184268	0.880095	0.220756	-0.834717	0.403877
F02E9.1	C14B1.8	970.512	730.022	1011.66	494.122	499.474	589.198	558.111	629.802	461.083	375.977	512.078	337.238	331.451	434.781	555.427	420.922	1101.42		589.017	-0.776767	0.583673	0.275538	-2.8191	0.00481591	0.0384211		589.017	-0.606154	0.656946	0.308108	-1.96734	0.0491439	0.287206		589.017	-0.289566	0.818148	0.277926	-1.04188	0.297466	0.973655		589.017	0.623607	1.54072	0.276475	2.25556	0.0240981
B0546.2	C14B1.9	3107.77	2789.29	3136.65	2368.04	2513.28	1997.24	2697.03	2852.7	1128.96	1006.78	1252.83	1027.86	947.129	1064.43	1358.37	1067.53	1245.09		1856.53	-0.393447	0.761308	0.139607	-2.81825	0.00482866	0.0384211		1856.53	-0.117969	0.921484	0.155967	-0.75637	0.449428	0.745211		1856.53	-0.156408	0.897256	0.142304	-1.09911	0.271719	0.973655		1856.53	0.115748	1.08354	0.141942	0.815457	0.414811
F32D8.14	C14B4.2	1911.16	1765.23	2145.92	1421.22	1287.39	1501.36	1452.72	1609.49	245.383	242.296	234.753	261.241	205.82	286.79	240.586	223.894	329.794		903.826	-0.467627	0.723153	0.165928	-2.81826	0.00482851	0.0384211		903.826	-0.342183	0.788847	0.185555	-1.84411	0.0651668	0.325379		903.826	0.0604378	1.04278	0.179816	0.336109	0.736789	0.975883		903.826	0.136855	1.09951	0.179521	0.762336	0.44586
Y71F9AL.14	hsp-12.2	671.893	619.505	785.409	478.341	450.693	530.644	500.165	492.033	1687.01	1509.13	1643.27	1442.05	1255.41	1929.4	1579.15	1405.16	1903.77		1110.77	-0.508334	0.703034	0.180382	-2.81809	0.00483098	0.0384211		1110.77	-0.480782	0.716589	0.202162	-2.37819	0.0173977	0.205487		1110.77	-0.0648342	0.956055	0.17602	-0.368334	0.712624	0.974801		1110.77	0.0144684	1.01008	0.175969	0.0822215	0.934471
R03D7.4	C14B9.2	3613.29	3265.83	3239.31	2606.71	2800.66	2430.9	2713.3	2860.35	1074.54	1115.4	1075.24	894.868	1027.32	944.017	1335.6	1076.48	1466.45		1972.96	-0.368481	0.774598	0.130789	-2.81736	0.00484205	0.038447		1972.96	-0.275322	0.826266	0.146273	-1.88224	0.0598032	0.314695		1972.96	-0.18791	0.877877	0.13413	-1.40095	0.161229	0.973655		1972.96	0.248181	1.18771	0.133498	1.85905	0.0630195
Y38C1AA.5	C14B9.3	268.757	304.176	228.247	433.959	343.587	384.26	329.377	356.45	320.581	448.039	350.305	461.683	403.621	339.184	277.218	275.838	214.14		337.613	0.536739	1.45069	0.190601	2.81604	0.00486195	0.0385427		337.613	0.360629	1.28399	0.213862	1.68627	0.0917443	0.371619		337.613	0.105971	1.07622	0.188414	0.562436	0.573819	0.973655		337.613	-0.545038	0.685373	0.190872	-2.85552	0.00429667
F26D2.2	gei-8	1070.76	862.845	1061.5	514.833	659.603	563.581	713.651	688.846	165.238	192.166	245.7	132.045	146.123	151.668	255.437	201.505	552.97		481.087	-0.785321	0.580223	0.279056	-2.81421	0.00488979	0.0386498		481.087	-0.509599	0.702418	0.311849	-1.63412	0.102234	0.389065		481.087	-0.486552	0.713729	0.290125	-1.67704	0.0935349	0.973655		481.087	0.746093	1.67724	0.285716	2.61131	0.00901969
C07F11.1	rpl-21	2475.34	3068.12	2257.55	3531.84	3783.7	3172.89	3690.24	3779.91	5033.32	4924.26	5179.16	6179.53	5236.39	4944.37	5605.75	4330.12	4852.04		4237.91	0.426956	1.34439	0.15172	2.81411	0.00489119	0.0386498		4237.91	0.522425	1.43637	0.169571	3.08087	0.00206398	0.104704		4237.91	0.112142	1.08083	0.151047	0.742431	0.457826	0.973655		4237.91	-0.0336856	0.976921	0.151093	-0.222946	0.823578
C13F10.6	C14B9.8	2933.93	2764.96	3086.82	2098.78	2076.37	1934.11	2219.23	2350.82	800.463	671.537	838.056	669.726	692.304	800.622	919.771	768.406	1384.23		1588.83	-0.524213	0.695338	0.186493	-2.8109	0.00494037	0.038931		1588.83	-0.358018	0.780236	0.208504	-1.71708	0.0859648	0.3594		1588.83	-0.0947889	0.936409	0.189899	-0.499153	0.617671	0.973655		1588.83	0.411877	1.33042	0.189225	2.17665	0.0295064
T21B10.3	C14C10.2	3442.65	3222.24	3673.88	2468.64	2848.38	2299.15	2999.98	3023.27	926.123	930.543	964.555	892.968	975.641	705.025	1034.62	988.718	1345.38		1925.99	-0.441104	0.736571	0.156957	-2.81034	0.00494886	0.038931		1925.99	-0.194502	0.873874	0.175414	-1.10882	0.267509	0.591045		1925.99	-0.132289	0.912383	0.160319	-0.825162	0.40928	0.973655		1925.99	0.25616	1.1943	0.159789	1.60311	0.10891
T23B12.3	ril-2	1524.02	1541.16	1522.98	1104.62	979.86	1302.82	1111.14	1175.41	330.475	284.072	364.901	296.389	334.124	374.114	319.791	325.095	411.113		782.476	-0.437274	0.738529	0.1556	-2.81024	0.00495053	0.038931		782.476	-0.419858	0.747498	0.174214	-2.41001	0.0159519	0.203019		782.476	0.0382947	1.0269	0.165369	0.231571	0.816871	0.988417		782.476	0.110501	1.0796	0.165145	0.669119	0.503419
Y110A7A.4	mma-1	4016.43	3551.76	4452.31	2512.03	2630.99	2324.77	2762.09	3095.43	1233.84	779.108	1065.51	713.424	792.096	1050.64	1538.56	879.457	1889.31		2075.75	-0.686789	0.621235	0.24449	-2.80907	0.0049685	0.0390099		2075.75	-0.452201	0.730927	0.273323	-1.65445	0.0980352	0.381486		2075.75	-0.268239	0.830333	0.246585	-1.08782	0.276676	0.973655		2075.75	0.484465	1.39907	0.245976	1.96956	0.0488883
C18E9.4	C14C10.5	1863.17	1928.47	2087.11	1247.63	1168.62	1456.53	1213.82	1329.58	975.595	994.251	1148.22	858.769	881.195	1334.68	1085.11	1148.13	1837.81		1326.98	-0.601988	0.658845	0.214398	-2.80781	0.00498799	0.0391004		1326.98	-0.623879	0.648924	0.239932	-2.60023	0.00931619	0.176069		1326.98	-0.0199254	0.986284	0.21545	-0.0924826	0.926315	0.994499		1326.98	0.385217	1.30606	0.215108	1.79081	0.073324
W08E3.1	erg-28	13218.2	11014.2	13664.9	7215.56	8143.23	7143.57	8503.83	9384.7	4685.03	3495.54	5130.51	3251.73	3421.43	5017.91	6371.07	4271.91	10785.6		7336.41	-0.75203	0.593768	0.268551	-2.80032	0.00510519	0.0395724		7336.41	-0.498102	0.708038	0.30024	-1.65901	0.0971138	0.380812		7336.41	-0.187169	0.878328	0.268897	-0.696062	0.48639	0.973655		7336.41	0.686967	1.6099	0.26876	2.55606	0.0105865
C10H11.10	hex-2	219.698	190.617	257.152	107.504	127.255	98.8096	179.938	153.077	319.592	312.27	475.588	247.941	254.825	330.912	481.172	334.051	1271.29		315.393	-1.00165	0.499428	0.357913	-2.79859	0.00513261	0.0395724		315.393	-0.417937	0.748494	0.397766	-1.05071	0.293391	0.617739		315.393	-0.408823	0.753238	0.350821	-1.16533	0.243885	0.973655		315.393	0.914868	1.8854	0.348864	2.62242	0.00873073
C35D10.13	C14C11.4	5820.94	4670.11	5752.02	3229.05	3226.96	3086.89	3321.22	3802.87	847.956	650.649	1044.83	555.73	588.949	785.915	1262.33	798.855	2157.67		2447.23	-0.76733	0.587504	0.27421	-2.79833	0.00513676	0.0395724		2447.23	-0.6041	0.657882	0.306586	-1.97041	0.0487916	0.287206		2447.23	-0.397302	0.759277	0.276989	-1.43436	0.151469	0.973655		2447.23	0.730515	1.65923	0.276025	2.64655	0.00813164
B0432.10	pqn-13	952.381	848.65	917.972	579.927	633.091	566.326	641.472	721.648	113.786	103.394	135.013	85.4969	105.138	129.607	164.351	98.5136	212.333		412.3	-0.611887	0.65434	0.218463	-2.80088	0.00509639	0.0395724		412.3	-0.411303	0.751944	0.24419	-1.68436	0.0921125	0.372053		412.3	-0.133966	0.911323	0.241175	-0.555471	0.578573	0.973655		412.3	0.434299	1.35125	0.237195	1.83098	0.0671037
W06E11.1	C14C6.13	1592.28	1587.8	1842.92	1191.42	1265.12	1153.69	1292.09	1490.31	1261.55	979.629	1170.12	1059.21	1015.74	1230.81	1532.62	1071.11	1614.64		1314.77	-0.476645	0.718647	0.170192	-2.80063	0.00510023	0.0395724		1314.77	-0.267448	0.830788	0.190206	-1.4061	0.159695	0.47421		1314.77	-0.0453809	0.969034	0.170913	-0.26552	0.790609	0.983921		1314.77	0.306187	1.23644	0.17056	1.79518	0.0726244
R07E5.8	lrch-1	2075.4	1823.03	2047.25	1318.64	1465.55	1284.53	1542.18	1583.25	527.376	334.202	468.29	358.137	388.474	354.811	656.413	398.532	650.553		1016.27	-0.547375	0.684264	0.195346	-2.80208	0.00507736	0.0395724		1016.27	-0.342824	0.788496	0.218361	-1.56999	0.116418	0.412675		1016.27	-0.271841	0.828262	0.201814	-1.34699	0.177983	0.973655		1016.27	0.358411	1.28201	0.200313	1.78925	0.0735738
C01G6.4	lite-1	1880.23	1737.86	1968.51	1375.85	1412.53	1294.59	1421.2	1516.55	1129.95	1059	1181.06	905.317	914.162	1070.87	1119.76	1203.66	1734.81		1348.58	-0.452478	0.730787	0.161512	-2.80151	0.00508634	0.0395724		1348.58	-0.342364	0.788748	0.180639	-1.89529	0.0580537	0.310079		1348.58	-0.221312	0.857785	0.162887	-1.35869	0.174246	0.973655		1348.58	0.268549	1.2046	0.162316	1.65448	0.0980293
ZK637.10	C14F11.4	235.696	234.215	263.132	170.625	163.31	195.789	200.269	221.961	103.892	98.1718	99.7396	89.2968	87.3176	104.789	118.808	102.991	139.146		154.656	-0.467228	0.723353	0.166902	-2.79942	0.00511949	0.0395724		154.656	-0.211895	0.863403	0.185622	-1.14154	0.253647	0.57776		154.656	-0.101686	0.931943	0.187943	-0.541048	0.588474	0.973655		154.656	0.257544	1.19544	0.184055	1.39928	0.16173
F52A8.1	hsp-43	8210.96	7802.11	8572.72	5792.37	5579.05	5782.19	5561.8	6224.76	2949.54	2969.18	4039.46	3296.38	2872.57	4143.75	3551.36	3291.25	4894.51		5031.41	-0.519305	0.697708	0.18538	-2.80131	0.00508961	0.0395724		5031.41	-0.475742	0.719097	0.207296	-2.29498	0.021734	0.214103		5031.41	0.0507023	1.03577	0.185933	0.272691	0.785091	0.982663		5031.41	0.237411	1.17887	0.185877	1.27724	0.201516
Y45G12B.1	rml-3	1565.62	1683.11	1500.05	2205.3	2499.49	1655.98	2329.02	2236.02	3952.84	3948.8	4058.92	4287.2	3571.11	4395.61	3763.24	3508.87	3768.69		2995.87	0.421248	1.33909	0.150499	2.79901	0.00512602	0.0395724		2995.87	0.528071	1.442	0.168158	3.14032	0.00168765	0.101046		2995.87	0.0349471	1.02452	0.149071	0.234432	0.814649	0.988417		2995.87	-0.115433	0.923105	0.149135	-0.774017	0.438921
F30A10.6	dct-1	2829.42	2643.29	3033.99	2212.21	2347.85	2331.18	2427.63	2330.05	836.083	837.594	705.476	757.123	800.115	773.965	821.754	764.823	743.618		1599.77	-0.303878	0.810072	0.108542	-2.79964	0.00511595	0.0395724		1599.77	-0.253348	0.838947	0.121461	-2.08584	0.0369931	0.259319		1599.77	-0.0306592	0.978973	0.114015	-0.268905	0.788003	0.983415		1599.77	-0.0317319	0.978245	0.114055	-0.278217	0.780846
T27D1.1	tnt-3	809.471	661.075	881.093	412.261	396.61	390.664	458.485	481.099	73.2191	59.5297	70.5476	43.6984	40.9858	72.6167	94.0562	72.5418	281.003		311.703	-0.97121	0.510078	0.347208	-2.7972	0.00515474	0.0395961		311.703	-0.738646	0.599301	0.38815	-1.90299	0.0570416	0.308384		311.703	-0.369982	0.773792	0.375746	-0.98466	0.324791	0.973655		311.703	1.13978	2.20348	0.365146	3.12144	0.00179969
T22C1.5	sfxn-2	1109.16	971.335	1129.27	670.664	672.328	661.476	740.082	793.813	288.919	215.142	276.109	147.245	175.526	248.184	389.096	247.179	551.163		546.276	-0.679258	0.624486	0.242924	-2.79617	0.00517116	0.0395961		546.276	-0.480355	0.716801	0.271568	-1.76882	0.0769243	0.346881		546.276	-0.449975	0.732056	0.252119	-1.78477	0.074298	0.973655		546.276	0.606127	1.52217	0.248677	2.43741	0.014793
Y57G11C.43	zipt-13	860.663	808.094	1029.6	676.582	661.724	579.134	683.153	755.544	260.225	220.364	254.214	226.092	212.948	264.729	291.079	280.316	421.052		499.148	-0.493326	0.710386	0.176598	-2.7935	0.00521414	0.0395961		499.148	-0.322644	0.799603	0.197415	-1.63434	0.102187	0.389065		499.148	-0.0621554	0.957832	0.187377	-0.331713	0.740106	0.975883		499.148	0.434409	1.35136	0.185305	2.3443	0.0190629
B0336.13	C14H10.2	1962.35	1737.86	2299.41	1264.4	1154.83	1151.86	1273.8	1321.93	1646.44	1266.83	1854.91	1185.56	1187.7	1699.6	2046.46	1481.29	3711.77		1661.59	-0.748522	0.595213	0.267963	-2.79338	0.0052161	0.0395961		1661.59	-0.623805	0.648957	0.299655	-2.08174	0.0373659	0.259456		1661.59	-0.227243	0.854266	0.267986	-0.847966	0.396457	0.973655		1661.59	0.602647	1.5185	0.267607	2.25199	0.0243231
C09G9.2	C14H10.3	2520.13	2487.14	2939.3	1816.71	1856.86	1688	1893.92	2006.4	1934.37	1519.57	1964.38	1443	1476.38	1723.5	2402.89	1646.97	3222.04		2031.86	-0.567769	0.674659	0.203079	-2.7958	0.00517707	0.0395961		2031.86	-0.441834	0.736198	0.227086	-1.94567	0.0516948	0.294857		2031.86	-0.222722	0.856947	0.203514	-1.09438	0.273787	0.973655		2031.86	0.424572	1.34217	0.203154	2.0899	0.0366265
ZC477.3	col-35	1151.82	1010.88	1191.07	757.456	753.983	736.498	811.244	759.917	558.048	522.191	597.222	429.384	491.83	458.68	645.523	501.524	1035.46		730.16	-0.577208	0.670259	0.206654	-2.79311	0.0052204	0.0395961		730.16	-0.508907	0.702755	0.231254	-2.20064	0.0277615	0.237989		730.16	-0.281268	0.822867	0.209492	-1.34262	0.179395	0.973655		730.16	0.380184	1.30151	0.208293	1.82524	0.0679651
Y73B6BL.27	sol-1	1923.96	1938.61	2143.93	1472.5	1290.57	1709.96	1407.99	1373.32	1119.07	1022.45	1070.38	999.364	1030.88	1183.01	1156.4	1166.94	1554.1		1386.08	-0.424926	0.744877	0.152079	-2.79412	0.00520413	0.0395961		1386.08	-0.525819	0.694565	0.170401	-3.08577	0.00203023	0.104704		1386.08	0.000572447	1.0004	0.153658	0.00372545	0.997028	1		1386.08	0.271796	1.20731	0.153343	1.77248	0.0763154
F36H1.1	C15A7.2	7277.77	6979.82	8089.31	5421.53	4652.21	6107.9	5394.06	5762.25	2397.43	2341.5	2555.52	2444.26	2043.95	3107.81	2893.96	2648.22	3372.94		4322.97	-0.465638	0.724151	0.166621	-2.79459	0.00519651	0.0395961		4322.97	-0.417278	0.748836	0.186326	-2.2395	0.0251235	0.227452		4322.97	0.0584944	1.04138	0.167634	0.34894	0.727134	0.975883		4322.97	0.289558	1.22227	0.16753	1.72839	0.0839177
C06A1.5	C15B12.4	5025.33	4646.79	5919.47	3381.92	3292.71	3144.52	3468.63	3965.78	1437.67	1133.15	1492.45	1015.51	931.982	1639.85	1566.28	1324.56	2450.42		2696.3	-0.667118	0.629763	0.238664	-2.79522	0.00518643	0.0395961		2696.3	-0.483549	0.715216	0.266834	-1.81218	0.0699591	0.334034		2696.3	-0.179618	0.882937	0.240215	-0.747739	0.454618	0.973655		2696.3	0.394715	1.31468	0.239857	1.64562	0.0998412
ZK632.6	gar-1	10764.1	10063.1	10766.5	8121.94	8820.86	8131.67	9009.08	9285.21	6937.02	5947.75	6005.06	5934.44	6294.89	5516.11	7267.08	5801.55	6902.19		7739.33	-0.333452	0.793635	0.119232	-2.79668	0.00516313	0.0395961		7739.33	-0.203291	0.868567	0.133308	-1.52498	0.127265	0.429339		7739.33	-0.0902479	0.939361	0.119557	-0.754852	0.450338	0.973655		7739.33	0.0801209	1.05711	0.119511	0.670406	0.502599
C49H3.4	actl-1	355.143	281.87	369.78	184.433	189.821	237.875	211.452	204.467	111.808	89.8168	137.446	87.3968	93.5546	111.223	172.271	113.738	264.739		189.226	-0.716991	0.608365	0.256847	-2.79151	0.00524632	0.0396093		189.226	-0.690298	0.619726	0.288131	-2.39578	0.016585	0.204031		189.226	-0.211583	0.863589	0.271484	-0.779359	0.435768	0.973655		189.226	0.702913	1.62779	0.265826	2.64426	0.00818699
F43D9.1	cdf-1	4819.5	4894.19	3359.92	7106.08	5762.51	6570.84	5691.92	5097.46	8214.39	10741.5	8968.05	13392.6	9263.69	8767.32	8024.48	6699.82	5783.6		7244.58	0.572386	1.48698	0.204977	2.79244	0.00523122	0.0396093		7244.58	0.307971	1.23797	0.229238	1.34346	0.179124	0.500035		7244.58	0.170331	1.12532	0.204666	0.832238	0.405275	0.973655		7244.58	-0.445357	0.734403	0.204748	-2.17514	0.0296193
Y44F5A.1	C15C6.1	623.9	563.739	787.402	436.918	451.754	526.985	467.634	510.621	60.3563	54.3078	47.4371	63.6477	60.5878	57.9095	71.2847	56.4214	53.3092		287.895	-0.480081	0.716938	0.171958	-2.79184	0.00524087	0.0396093		287.895	-0.429081	0.742735	0.192675	-2.22697	0.0259494	0.229761		287.895	0.161807	1.11869	0.226604	0.714051	0.475196	0.973655		287.895	0.149521	1.1092	0.227033	0.658588	0.510161
T02H6.11	C15C6.2	7973.13	7067.02	8829.87	5363.34	5316.06	5236.91	5475.39	6001.71	2127.31	2013.57	2516.6	1802.08	1873.77	2977.28	2496.94	2458.36	3760.56		4311.17	-0.5847	0.666788	0.209691	-2.78839	0.00529702	0.0397478		4311.17	-0.471497	0.721216	0.234458	-2.01101	0.0443242	0.276578		4311.17	-0.00076125	0.999472	0.210661	-0.00361362	0.997117	1		4311.17	0.388895	1.30939	0.210505	1.84744	0.0646836
F19B6.2	popl-4	2851.81	2604.76	3320.05	2027.77	2153.78	1862.74	2172.47	2366.13	1128.96	1036.03	1235.8	977.515	929.309	1249.19	1356.39	1039.77	1814.32		1772.16	-0.538205	0.688627	0.192996	-2.78869	0.00529221	0.0397478		1772.16	-0.366517	0.775653	0.215772	-1.69864	0.0893879	0.366624		1772.16	-0.107539	0.92817	0.194767	-0.552143	0.58085	0.973655		1772.16	0.308369	1.23831	0.194388	1.58636	0.112658
C34E10.2	C15C7.4	1614.68	1539.13	2015.35	1177.61	1173.92	1228.72	1193.48	1310.99	79.1558	53.2634	86.3599	62.6977	62.3697	79.9703	96.0363	68.0639	116.557		703.433	-0.529886	0.692609	0.189938	-2.78978	0.00527441	0.0397478		703.433	-0.460603	0.726682	0.21249	-2.16765	0.0301857	0.243791		703.433	-0.0893354	0.939956	0.233954	-0.38185	0.702572	0.974801		703.433	0.362928	1.28603	0.228672	1.58711	0.112488
Y34B4A.3	bbln-1	1329.92	1321.14	1365.5	1024.74	1081.66	1031.1	1103.01	1144.8	561.017	503.392	560.731	447.434	465.991	557.954	645.523	507.793	605.376		838.651	-0.356503	0.781056	0.12785	-2.78844	0.00529626	0.0397478		838.651	-0.252578	0.839395	0.14303	-1.76591	0.077411	0.347764		838.651	-0.143026	0.905618	0.133592	-1.07062	0.284342	0.973655		838.651	0.113568	1.0819	0.132838	0.854935	0.392587
T27D12.2	pfut-1	191.969	168.311	149.507	259.389	284.202	234.215	227.718	173.852	283.971	346.735	352.738	383.786	425.896	413.639	210.884	375.247	229.501		277.151	0.609442	1.52567	0.218882	2.78434	0.00536361	0.0401862		277.151	0.242483	1.18303	0.246981	0.981785	0.326206	0.651406		277.151	0.315913	1.2448	0.21198	1.49029	0.136147	0.973655		277.151	-0.267817	0.830575	0.21387	-1.25224	0.210482
T20G5.14	xbx-9	1887.7	1907.18	2277.49	1458.69	1332.99	1490.38	1339.87	1450.95	494.724	536.812	606.952	491.132	490.939	637.005	542.556	561.527	841.201		1079.3	-0.503896	0.7052	0.181264	-2.77991	0.00543745	0.0406156		1079.3	-0.536729	0.689332	0.202904	-2.64524	0.00816324	0.168364		1079.3	-0.0163347	0.988742	0.185968	-0.087836	0.930007	0.994499		1079.3	0.248862	1.18827	0.185461	1.34186	0.179643
T09E8.3	cky-1	2473.21	2579.41	2449.92	1709.21	1723.24	1909.4	1742.45	1942.98	792.547	822.972	974.286	801.771	646.863	754.662	789.082	719.149	1177.32		1412.26	-0.48995	0.71205	0.176218	-2.78036	0.00542981	0.0406156		1412.26	-0.440658	0.736799	0.197129	-2.23538	0.0253926	0.229235		1412.26	-0.232716	0.851031	0.17923	-1.29842	0.194143	0.973655		1412.26	0.0532162	1.03758	0.178815	0.297605	0.766004
Y39A3CR.1	C15C8.4	653.762	502.904	732.583	435.932	466.6	368.706	485.933	528.115	654.025	533.679	689.663	541.48	553.309	575.418	733.638	626.009	1067.09		596.991	-0.572215	0.672583	0.206104	-2.77634	0.00549752	0.0409967		596.991	-0.312893	0.805026	0.230133	-1.35962	0.17395	0.492409		596.991	-0.168285	0.8899	0.205134	-0.820367	0.412007	0.973655		596.991	0.370809	1.29308	0.204281	1.81519	0.0694941
ZK287.4	C15F1.1	418.067	389.345	297.02	529.628	516.441	459.282	474.75	392.533	1577.18	1511.22	1666.38	1677.64	1844.36	1778.65	1662.32	1761.6	2151.34		1123.99	0.447078	1.36328	0.161058	2.77589	0.00550516	0.0409967		1123.99	0.237594	1.17902	0.181012	1.31259	0.189322	0.511111		1123.99	0.156998	1.11496	0.15322	1.02466	0.305525	0.973655		1123.99	0.229957	1.1728	0.153174	1.50128	0.133282
F32H2.4	C15F1.2	2056.21	1876.76	2422.01	1391.63	1362.68	1376.93	1434.42	1598.56	673.814	515.924	737.1	472.133	530.143	615.863	935.612	608.993	1271.29		1169.42	-0.62133	0.650071	0.223938	-2.77456	0.00552765	0.0411019		1169.42	-0.48227	0.71585	0.250407	-1.92594	0.0541113	0.301677		1169.42	-0.251366	0.840101	0.227307	-1.10584	0.268796	0.973655		1169.42	0.547776	1.46183	0.226213	2.4215	0.0154565
ZK973.11	C15F1.5	3064.04	3036.69	3286.16	2588.96	2672.35	2442.79	2735.66	2866.91	611.479	565.01	599.654	638.377	555.091	609.429	573.248	514.062	558.391		1642.25	-0.28522	0.820617	0.102847	-2.77326	0.00554984	0.0412046		1642.25	-0.159696	0.895214	0.114993	-1.38874	0.164911	0.481241		1642.25	0.0212275	1.01482	0.111414	0.190527	0.848896	0.991268		1642.25	-0.110445	0.926302	0.111922	-0.986798	0.323742
F13D12.7	art-1	5124.52	5473.14	5124.1	6965.05	8607.71	5572.68	8150.05	8394.08	8661.62	9908.04	10121.1	11345.4	10131.5	10388.8	8588.82	8923.54	7435.28		8171.5	0.427455	1.34486	0.15419	2.77226	0.0055669	0.041269		8171.5	0.65851	1.57845	0.172324	3.82135	0.000132725	0.0675476		8171.5	0.151454	1.11069	0.153884	0.984204	0.325015	0.973655		8171.5	-0.201649	0.869556	0.153941	-1.30991	0.190227
F38A5.13	C15H11.10	7625.45	6611.77	7373.67	4593.06	5526.03	4522.37	5639.06	5921.89	1878.96	1333.67	1424.33	1428.75	1459.45	1082.82	2284.08	1336.2	1596.57		3625.77	-0.561743	0.677483	0.20267	-2.77171	0.00557626	0.0412761		3625.77	-0.317538	0.802438	0.22657	-1.4015	0.161063	0.475976		3625.77	-0.223929	0.85623	0.204461	-1.09521	0.273423	0.973655		3625.77	0.169468	1.12464	0.204189	0.829957	0.406563
C27D8.4	C15H11.11	743.348	683.382	873.12	528.641	501.595	451.963	537.779	553.264	274.077	225.586	271.243	207.093	227.204	235.315	342.563	289.272	620.736		445.069	-0.634052	0.644364	0.228831	-2.77084	0.00559126	0.0413249		445.069	-0.490974	0.711545	0.255934	-1.91836	0.0550652	0.304672		445.069	-0.202818	0.868852	0.236287	-0.858354	0.390697	0.973655		445.069	0.700923	1.62554	0.233488	3.00197	0.00268239
C40H1.6	gnrr-2	1192.34	1120.38	1148.21	862.001	693.537	1031.1	798.028	812.401	1352.57	1271.01	1329.46	1246.35	1319.57	1532.3	1463.32	1459.79	1704.99		1196.32	-0.419086	0.747899	0.151397	-2.76813	0.00563792	0.0416072		1196.32	-0.518744	0.697979	0.169907	-3.05311	0.00226482	0.107579		1196.32	0.0520747	1.03675	0.15016	0.346796	0.728745	0.975883		1196.32	0.227535	1.17083	0.149996	1.51694	0.129281
R11A8.4	nxf-1	3753	3574.07	3857.28	2801.01	2787.93	2771.24	2951.18	3062.63	777.706	623.495	656.822	624.127	555.982	671.015	813.834	564.214	572.848		1848.14	-0.41988	0.747487	0.151757	-2.76679	0.00566113	0.0417158		1848.14	-0.310189	0.806536	0.169699	-1.82787	0.0675686	0.328843		1848.14	-0.153572	0.899022	0.157234	-0.976707	0.328714	0.973655		1848.14	-0.0786494	0.946944	0.1571	-0.500633	0.61663
R02F2.9	dhs-22	615.368	538.391	637.896	386.618	357.373	466.601	446.286	417.681	557.059	469.971	614.25	436.034	456.19	557.034	724.728	525.704	929.748		537.467	-0.564799	0.676049	0.204237	-2.76541	0.00568508	0.0417671		537.467	-0.467132	0.723401	0.228614	-2.04332	0.0410204	0.268863		537.467	-0.178873	0.883393	0.203765	-0.877839	0.380031	0.973655		537.467	0.410167	1.32884	0.202698	2.02354	0.0430177
ZK1058.3	rrbs-1	229.297	200.756	293.033	145.968	191.942	149.129	174.855	167.291	2075.86	2053.25	2377.94	2203.92	1750.81	2431.28	2572.19	1923.7	2776.6		1277.52	-0.572341	0.672524	0.206955	-2.76553	0.00568306	0.0417671		1277.52	-0.494788	0.709666	0.232248	-2.13043	0.0331363	0.249706		1277.52	-0.0269824	0.981471	0.190538	-0.141612	0.887386	0.993187		1277.52	0.160552	1.11771	0.190449	0.843017	0.399219
R107.5	C15H9.3	5786.81	6064.25	5988.25	3958.89	3346.79	4394.28	3822.4	3777.72	1498.02	1824.53	2146.84	1348.95	1405.99	1813.58	2713.77	2445.82	4562		3346.99	-0.60849	0.655883	0.220285	-2.76229	0.0057398	0.0421061		3346.99	-0.646004	0.639048	0.246366	-2.62213	0.00873819	0.170934		3346.99	-0.25934	0.83547	0.221498	-1.17084	0.241662	0.973655		3346.99	0.830164	1.77789	0.221001	3.75638	0.000172387
Y25C1A.5	C15H9.4	2615.05	2778.14	2498.76	3492.39	4054.12	2861.82	4076.55	3993.12	537.27	504.436	493.833	562.38	483.811	515.671	546.516	440.624	462.615		1818.65	0.39906	1.31865	0.144512	2.76144	0.00575475	0.0421529		1818.65	0.617108	1.5338	0.161438	3.82257	0.00013207	0.0675476		1818.65	0.0237825	1.01662	0.152015	0.156449	0.875679	0.993187		1818.65	-0.0841414	0.943346	0.152372	-0.552209	0.580806
K03D10.1	C15H9.5	1492.03	1838.24	1333.6	2327.6	2288.46	2207.66	2211.1	2305.99	2495.39	2601.55	2527.55	3093.09	2589.24	2498.38	3546.41	2290.89	1931.78		2328.17	0.549018	1.46309	0.198898	2.76029	0.00577496	0.042238		2328.17	0.538816	1.45278	0.222365	2.42312	0.0153879	0.201664		2328.17	0.101551	1.07293	0.198322	0.51205	0.608616	0.973655		2328.17	0.0268885	1.01881	0.19836	0.135554	0.892174
C35D10.10	clec-135	2064.74	2088.67	2371.18	1618.47	1392.38	1702.64	1506.6	1572.32	697.56	633.939	780.888	644.077	616.569	751.905	766.31	646.607	1014.68		1227.62	-0.468927	0.722502	0.169914	-2.7598	0.00578369	0.042239		1227.62	-0.498585	0.707801	0.190197	-2.62141	0.00875663	0.170934		1227.62	-0.0692846	0.953111	0.17357	-0.399174	0.689765	0.974801		1227.62	0.201338	1.14976	0.173124	1.16297	0.244841
C28D4.2	smrc-1	997.174	981.474	1244.89	776.195	858.968	713.625	795.995	887.846	291.887	354.045	321.113	307.789	285.119	361.245	257.417	333.155	357.804		595.632	-0.457294	0.728351	0.16584	-2.75744	0.00582557	0.0424817		595.632	-0.352256	0.783358	0.185536	-1.89859	0.0576188	0.30937		595.632	-0.0191854	0.98679	0.174076	-0.110213	0.91224	0.994499		595.632	-0.0266583	0.981692	0.174165	-0.153063	0.878348
Y54E10A.7	let-716	643.097	541.433	742.55	492.149	431.605	516.921	527.614	509.527	245.383	245.43	217.724	233.692	220.076	268.406	237.616	262.404	237.633		386.662	-0.419025	0.74793	0.152058	-2.75569	0.0058568	0.0426462		386.662	-0.308852	0.807284	0.170179	-1.81487	0.0695439	0.332998		386.662	0.0257293	1.01799	0.162523	0.158311	0.874211	0.993187		386.662	0.05685	1.04019	0.162431	0.349995	0.726342
F42A9.8	znf-622	405.269	365.011	450.514	228.815	206.789	217.747	240.933	297.406	182.058	168.145	249.349	125.395	130.085	250.941	275.238	208.67	593.629		270.353	-0.901817	0.535212	0.327407	-2.75442	0.00587961	0.042749		270.353	-0.596578	0.661321	0.365659	-1.63151	0.102782	0.389192		270.353	-0.242056	0.845539	0.331431	-0.730337	0.465185	0.973655		270.353	0.847514	1.7994	0.328422	2.58056	0.00986388
C55C2.5	nfx-1	73.5883	68.9465	86.7139	131.174	133.617	103.384	80.3111	88.5659	418.536	507.569	513.294	469.283	537.271	533.135	258.407	529.287	416.535		291.154	0.681213	1.60349	0.2476	2.75126	0.00593664	0.0430998		291.154	0.14275	1.10401	0.283427	0.503656	0.614503	0.84844		291.154	0.0978107	1.07015	0.221869	0.440849	0.659322	0.974801		291.154	-0.255711	0.837574	0.222683	-1.14832	0.250837
Y53G8AR.5	thoc-2	383.939	324.454	377.754	246.568	211.03	253.428	279.564	278.819	2604.23	1888.24	2480.11	1779.29	1716.06	2504.82	3103.85	2181.63	3798.51		1436.02	-0.61042	0.655006	0.222056	-2.74895	0.00597873	0.0433414		1436.02	-0.374831	0.771196	0.247927	-1.51186	0.130569	0.434942		1436.02	-0.216664	0.860553	0.212365	-1.02025	0.307612	0.973655		1436.02	0.381643	1.30282	0.212115	1.79923	0.0719822
F31E8.3	rps-13	392.471	354.872	374.764	254.458	234.36	308.323	242.967	275.538	186.016	130.548	138.662	134.895	144.341	173.729	207.914	167.473	174.384		229.16	-0.491609	0.711231	0.179103	-2.74483	0.0060542	0.0437129		229.16	-0.529233	0.692923	0.201596	-2.62522	0.00865931	0.169966		229.16	-0.0101299	0.993003	0.19173	-0.0528342	0.957864	0.99909		229.16	0.267766	1.20394	0.189884	1.41016	0.158492
F44G4.4	lin-18	3737	3348.98	3984.85	2728.03	3035.02	2465.67	2982.69	3291.15	1615.77	1471.53	1716.25	1563.64	1465.69	1587.46	2124.68	1432.03	1957.08		2382.8	-0.428181	0.743198	0.155996	-2.74482	0.00605434	0.0437129		2382.8	-0.234434	0.850018	0.174379	-1.34439	0.178821	0.499648		2382.8	-0.0570458	0.96123	0.157405	-0.362414	0.717042	0.974801		2382.8	0.198916	1.14784	0.157202	1.26535	0.205747
C02F5.13	C16B8.4	827.601	688.451	906.011	548.367	493.111	513.261	555.062	604.654	4.94724	9.39943	8.51436	16.1494	4.45498	7.35359	11.8808	0.895578	15.3603		306.793	-0.639509	0.641931	0.232998	-2.7447	0.00605666	0.0437129		306.793	-0.47762	0.718162	0.260541	-1.83319	0.066775	0.32753		306.793	0.290367	1.22295	0.46928	0.618749	0.536082	0.973655		306.793	0.302381	1.23318	0.469363	0.644237	0.519422
Y105C5B.28	glod-4	4093.21	4091.16	3829.37	5572.43	5939.61	4443.69	5857.63	5768.81	10031	10062.6	8140.94	7535.13	6084.61	7508.93	7840.33	7395.68	6545.28		6514.14	0.409287	1.32803	0.149432	2.73895	0.00616358	0.0442248		6514.14	0.537705	1.45166	0.167021	3.21939	0.00128465	0.0983518		6514.14	-0.418372	0.748269	0.148977	-2.80831	0.00498029	0.973655		6514.14	-0.374487	0.77138	0.148971	-2.51383	0.0119427
D1037.3	har-1	5039.2	4513.97	4895.85	3705.42	3609.79	3775.81	3768.52	4159.32	2048.16	1974.92	2435.11	2040.53	1958.41	2414.74	2493.97	2375.97	3053.08		3191.93	-0.381534	0.767621	0.139269	-2.73955	0.00615232	0.0442248		3191.93	-0.281043	0.822996	0.155734	-1.80463	0.0711331	0.335935		3191.93	-0.00959939	0.993368	0.140394	-0.0683746	0.945487	0.996321		3191.93	0.295368	1.2272	0.1402	2.10676	0.0351386
K08E4.6	C16C10.13	2090.33	1906.17	2200.74	1392.61	1404.04	1375.1	1493.38	1538.42	698.55	668.404	729.802	608.928	560.437	780.4	766.31	650.19	1274.9		1184.63	-0.570992	0.673154	0.208466	-2.73902	0.00616229	0.0442248		1184.63	-0.446509	0.733816	0.23312	-1.91536	0.0554466	0.305772		1184.63	-0.104742	0.929971	0.211372	-0.495533	0.620224	0.973655		1184.63	0.360537	1.2839	0.210749	1.71074	0.0871284
E02H1.6	C16C10.2	601.504	588.073	619.955	442.836	370.099	474.835	456.452	512.807	290.898	226.631	270.027	189.043	206.711	281.275	351.473	272.256	352.383		382.78	-0.489912	0.712069	0.178847	-2.73928	0.00615738	0.0442248		382.78	-0.316008	0.80329	0.199902	-1.58081	0.113921	0.407246		382.78	-0.218032	0.859738	0.186814	-1.1671	0.243168	0.973655		382.78	0.309069	1.23891	0.184538	1.67482	0.0939694
C27F2.10	C16C10.4	2765.43	2632.13	3024.02	1951.83	1798.53	1803.28	2035.23	2093.87	759.896	579.631	784.537	546.23	542.617	682.965	807.893	625.113	1303.82		1455.12	-0.600668	0.659449	0.219357	-2.73831	0.00617563	0.0442467		1455.12	-0.443324	0.735438	0.245261	-1.80756	0.0706753	0.335038		1455.12	-0.261327	0.83432	0.222792	-1.17296	0.240811	0.973655		1455.12	0.36606	1.28883	0.221952	1.64928	0.0990911
Y69A2AR.28	rnf-121	2909.4	2423.27	2708.07	1612.55	1698.85	1859.08	1876.64	1942.98	1636.55	1229.24	1711.39	1080.11	1041.57	1623.31	2165.27	1408.74	2806.41		1866.67	-0.63696	0.643066	0.232774	-2.73639	0.00621181	0.0444411		1866.67	-0.488929	0.712554	0.260272	-1.87853	0.0603088	0.316233		1866.67	-0.289363	0.818263	0.233506	-1.23921	0.215267	0.973655		1866.67	0.479309	1.39408	0.23306	2.05659	0.0397256
R07E5.2	ccdc-55	2127.66	1997.42	2597.43	1539.57	1536.6	1455.61	1538.11	1691.5	4583.12	3703.38	4934.68	3640.27	3600.52	5121.78	5531.49	4269.22	7419.92		3369.9	-0.568999	0.674084	0.208216	-2.73273	0.00628112	0.0447181		3369.9	-0.472767	0.720581	0.232865	-2.03022	0.0423344	0.272373		3369.9	-0.096808	0.9351	0.207144	-0.467347	0.640252	0.973655		3369.9	0.381355	1.30256	0.207041	1.84193	0.0654852
F39B2.10	eat-16	10029.3	9027.94	9888.38	7937.51	8396.68	7042.02	8784.41	9176.96	4326.85	3919.56	4314.35	3978.46	3890.09	4034.36	4633.51	4000.55	4778.85		6362.34	-0.308382	0.807547	0.112806	-2.73374	0.00626198	0.0447181		6362.34	-0.103493	0.930777	0.126097	-0.820739	0.411795	0.719546		6362.34	-0.0775765	0.947648	0.113595	-0.68292	0.494657	0.973655		6362.34	0.0946929	1.06784	0.113522	0.834136	0.404204
C27C12.4	ocrl-1	1091.03	1100.1	1213	907.369	903.507	825.243	858.007	963.291	921.176	795.818	908.604	871.119	819.717	976.189	944.522	786.317	1002.03		934.532	-0.369239	0.774191	0.135132	-2.73243	0.00628692	0.0447181		934.532	-0.317724	0.802335	0.15133	-2.09955	0.0357686	0.255362		934.532	0.0226674	1.01584	0.135759	0.166968	0.867395	0.993187		934.532	0.0577479	1.04084	0.135723	0.425485	0.670483
F08C6.6	C16C2.4	1538.95	1378.93	1850.89	1214.1	1380.71	1038.42	1490.33	1511.09	1665.24	1639.68	1598.27	1463.9	1512.91	1740.96	1638.56	1646.97	1693.24		1529.6	-0.393005	0.761541	0.14379	-2.73319	0.00627247	0.0447181		1529.6	-0.0831225	0.944012	0.16049	-0.517928	0.604508	0.842141		1529.6	-0.0556877	0.962136	0.143276	-0.388675	0.697516	0.974801		1529.6	0.0219947	1.01536	0.143215	0.153578	0.877943
T13C5.5	C16C8.18	214.366	194.673	242.201	150.899	154.826	143.64	197.22	164.011	402.705	436.551	537.621	424.635	424.114	505.559	441.569	481.821	654.167		339.446	-0.536125	0.689621	0.196254	-2.73179	0.00629914	0.0447403		339.446	-0.264516	0.832478	0.218369	-1.21133	0.22577	0.548925		339.446	-0.0222931	0.984666	0.18363	-0.121402	0.903372	0.994499		339.446	0.198342	1.14738	0.183118	1.08314	0.278747
F01G4.2	npr-4	4114.54	3949.22	5133.07	2993.33	2973.51	2644.07	3055.89	3385.19	671.835	602.608	751.696	545.28	493.612	741.793	697.996	589.29	1150.21		2029.01	-0.616009	0.652474	0.22554	-2.73126	0.00630926	0.0447475		2029.01	-0.449898	0.732095	0.252166	-1.78413	0.0744018	0.340908		2029.01	-0.18598	0.879052	0.229469	-0.810478	0.417666	0.973655		2029.01	0.267195	1.20347	0.228855	1.16753	0.242996
R53.6	C16D9.1	1448.3	1343.44	1713.35	877.781	842.001	844.456	921.036	1048.58	445.251	318.536	513.294	284.04	267.299	446.731	566.317	384.203	1084.25		785.228	-0.813046	0.569179	0.297771	-2.73045	0.00632487	0.0447936		785.228	-0.608761	0.65576	0.33291	-1.82861	0.0674587	0.328533		785.228	-0.355098	0.781817	0.301789	-1.17664	0.239338	0.973655		785.228	0.672702	1.59406	0.300182	2.24098	0.0250271
T21C9.5	C16D9.6	2534	2155.59	3181.5	1878.85	1766.72	1794.13	1924.42	2096.06	1019.13	981.718	1160.39	943.316	923.072	1259.3	1063.33	1131.11	1639.03		1614.8	-0.533065	0.691085	0.19528	-2.72975	0.00633825	0.0448238		1614.8	-0.384314	0.766143	0.218344	-1.76013	0.0783853	0.350374		1614.8	-0.0160065	0.988966	0.197006	-0.0812488	0.935244	0.994546		1614.8	0.278662	1.21307	0.196731	1.41646	0.156642
F10G8.3	C16D9.8	4447.29	3945.16	4835.05	2764.52	3250.29	2644.99	3273.44	3533.89	1796.84	1290.85	1834.24	1272.95	1316	1463.36	2428.63	1323.66	2713.35		2596.15	-0.611209	0.654648	0.224115	-2.72721	0.00638722	0.0450404		2596.15	-0.373438	0.771941	0.25054	-1.49053	0.136084	0.443549		2596.15	-0.280345	0.823394	0.225299	-1.24432	0.21338	0.973655		2596.15	0.393604	1.31367	0.224914	1.75002	0.080115
E04A4.7	C16E9.1	9739.25	9285.47	11066.5	7283.61	7057.32	7747.41	7352.02	7998.27	6563.01	7005.71	6917.31	5350.21	6334.09	7193.65	6581.95	7940.19	10116.1		7737.18	-0.446042	0.734054	0.163527	-2.72763	0.00637907	0.0450404		7737.18	-0.386138	0.765175	0.182854	-2.11173	0.0347097	0.252639		7737.18	-0.117903	0.921526	0.163673	-0.720358	0.471304	0.973655		7737.18	0.266327	1.20274	0.163603	1.62789	0.103548
T12D8.10	C16E9.2	557.778	598.212	663.81	392.536	358.434	365.047	388.34	447.203	332.454	241.252	339.358	231.792	220.967	344.7	326.722	296.436	631.578		396.272	-0.705484	0.613237	0.258818	-2.72579	0.00641473	0.0451697		396.272	-0.538321	0.688572	0.289426	-1.85996	0.062891	0.321149		396.272	-0.194876	0.873648	0.26238	-0.742723	0.457649	0.973655		396.272	0.459452	1.37502	0.260737	1.76213	0.078047
Y116A8C.42	ncs-7	7525.2	6857.14	8561.76	4966.86	4917.33	4828.86	5012.84	5810.36	3087.08	2309.13	3262.22	2262.82	2171.36	3254.88	3888.98	2864.95	5873.95		4556.22	-0.641034	0.641253	0.235225	-2.7252	0.00642627	0.0451861		4556.22	-0.499057	0.707569	0.262999	-1.89756	0.0577537	0.309627		4556.22	-0.171223	0.88809	0.235812	-0.726097	0.467779	0.973655		4556.22	0.544526	1.45854	0.235609	2.31114	0.0208251
ZK370.8	lec-9	1015.3	972.349	1145.22	738.717	871.694	720.944	879.356	909.714	437.336	341.513	340.574	320.138	342.143	258.295	360.384	317.035	299.074		604.105	-0.426892	0.743862	0.156737	-2.72362	0.00645708	0.0452732		604.105	-0.223456	0.856511	0.175109	-1.2761	0.201922	0.524242		604.105	-0.283606	0.821535	0.1646	-1.723	0.0848887	0.973655		604.105	-0.199407	0.870909	0.164303	-1.21365	0.224881
ZK355.2	C16H3.3	290.087	331.552	317.951	457.63	585.371	339.429	530.663	551.077	120.713	104.438	144.744	112.096	92.6636	131.445	107.917	116.425	127.4		262.447	0.555515	1.46969	0.203958	2.72367	0.00645602	0.0452732		262.447	0.78794	1.72661	0.227159	3.46866	0.000523054	0.0821654		262.447	-0.135065	0.910629	0.222791	-0.606241	0.544355	0.973655		262.447	-0.0685029	0.953627	0.222338	-0.308102	0.758005
F55A11.8	C17C3.1	508.719	445.111	568.126	249.527	264.053	234.215	283.63	324.742	198.879	212.009	321.113	156.744	149.687	214.173	322.761	236.433	1034.56		336.734	-1.02539	0.491277	0.376749	-2.72168	0.00649503	0.0453999		336.734	-0.738075	0.599539	0.42101	-1.75311	0.0795835	0.350996		336.734	-0.490457	0.7118	0.380197	-1.29001	0.197048	0.973655		336.734	1.124	2.1795	0.376942	2.98188	0.0028648
B0280.1	ins-11	1205.14	1205.55	1405.36	936.957	872.754	924.968	860.041	984.066	88.0608	79.373	96.0906	71.2474	83.7537	123.173	84.1555	83.2887	113.847		542.225	-0.48069	0.716635	0.176598	-2.72194	0.00648994	0.0453999		542.225	-0.464453	0.724746	0.197726	-2.34897	0.0188252	0.20731		542.225	0.0812691	1.05795	0.212845	0.381824	0.702592	0.974801		542.225	0.0979179	1.07023	0.21282	0.460098	0.645446
C10G11.5	dhhc-7	1608.28	1444.84	1690.42	1246.65	1296.94	1182.06	1311.41	1271.63	1167.55	1008.87	1059.43	1037.36	1063.85	1093.85	1290.05	1008.42	1030.04		1224.21	-0.348701	0.785291	0.128138	-2.72129	0.00650285	0.0453999		1224.21	-0.291882	0.816836	0.143431	-2.035	0.0418512	0.271332		1224.21	-0.0185533	0.987222	0.129281	-0.143512	0.885886	0.993187		1224.21	0.0399191	1.02806	0.129212	0.308942	0.757365
T24H7.4	unc-75	460.726	340.677	483.405	239.664	222.695	249.769	239.917	226.335	230.541	232.897	319.897	185.243	188	275.76	354.443	254.344	776.146		310.615	-0.851081	0.554369	0.312898	-2.72	0.00652829	0.0454826		310.615	-0.877285	0.544391	0.350813	-2.50072	0.0123941	0.185416		310.615	-0.27022	0.829193	0.314943	-0.857995	0.390895	0.973655		310.615	0.823524	1.76972	0.312467	2.63555	0.00840002
K02B2.1	C17D12.5	3669.81	3179.65	3819.4	2396.64	2645.83	2245.17	2718.38	2913.93	100.924	88.7724	108.254	78.8471	92.6636	130.526	129.699	97.618	183.42		1447.03	-0.549961	0.683039	0.202232	-2.71946	0.00653896	0.0454826		1447.03	-0.336668	0.791868	0.226074	-1.48919	0.136437	0.444091		1447.03	0.0219179	1.01531	0.233052	0.094047	0.925072	0.994499		1447.03	0.465077	1.38039	0.229533	2.02619	0.0427454
D2085.6	spe-9	485.256	499.862	553.175	379.714	380.703	393.409	484.916	474.538	346.307	307.048	335.709	257.441	283.337	269.325	367.314	266.882	394.849		381.164	-0.414966	0.750037	0.152602	-2.71928	0.00654246	0.0454826		381.164	-0.0962438	0.935465	0.169782	-0.566868	0.570804	0.829066		381.164	-0.287656	0.819232	0.157353	-1.8281	0.0675345	0.973655		381.164	0.0565509	1.03998	0.155812	0.362942	0.716648
Y54E10BR.3	C17E4.11	1590.15	1462.07	1948.57	1122.38	1294.81	1117.1	1455.77	1507.81	426.452	332.113	423.285	284.99	286.01	380.548	401.966	381.516	552.066		880.447	-0.500982	0.706625	0.184289	-2.71845	0.00655876	0.0455315		880.447	-0.169946	0.888876	0.205817	-0.825712	0.408967	0.717747		880.447	-0.312307	0.805353	0.192025	-1.62639	0.103867	0.973655		880.447	0.177061	1.13058	0.190551	0.929206	0.352782
F37B12.3	2003-03-01	2286.57	2158.63	2368.19	1585.92	1529.18	1586.44	1492.36	1668.54	442.283	382.243	457.343	351.487	392.929	432.943	510.874	422.713	818.612		1111.02	-0.535213	0.690057	0.197181	-2.71432	0.00664121	0.0460312		1111.02	-0.523147	0.695852	0.220614	-2.37132	0.0177247	0.205487		1111.02	-0.122184	0.918796	0.203752	-0.599672	0.548725	0.973655		1111.02	0.451538	1.3675	0.202466	2.23019	0.0257347
Y73B6A.4	C17E4.6	758.279	739.147	899.034	572.037	558.86	516.921	593.692	591.533	127.639	108.616	166.638	133.945	114.939	150.749	151.48	133.441	228.597		385.032	-0.540619	0.687476	0.199203	-2.71391	0.00664947	0.0460312		385.032	-0.430878	0.74181	0.222876	-1.93327	0.0532035	0.299501		385.032	-0.00771282	0.994668	0.218954	-0.0352258	0.9719	1		385.032	0.355163	1.27913	0.216595	1.63975	0.101056
T12D8.7	nhr-157	2080.73	1922.39	2229.64	1375.85	1290.57	1473.91	1421.2	1547.17	567.943	425.063	520.592	390.436	476.683	577.257	743.539	500.628	1002.94		1090.97	-0.590037	0.664326	0.217507	-2.71272	0.00667325	0.0460889		1090.97	-0.485294	0.714352	0.24325	-1.99504	0.0460384	0.279894		1090.97	-0.0674206	0.954343	0.222003	-0.303693	0.761362	0.979046		1090.97	0.570006	1.48453	0.220954	2.57975	0.00988729
F43G9.13	C17G1.2	591.906	533.322	673.777	391.55	363.736	407.132	389.356	376.132	299.803	280.938	352.738	257.441	256.607	342.861	348.503	279.42	590.919		396.244	-0.629871	0.646234	0.232205	-2.71256	0.00667656	0.0460889		396.244	-0.64778	0.638262	0.260311	-2.48848	0.0128291	0.186892		396.244	-0.122514	0.918586	0.23583	-0.5195	0.603412	0.973655		396.244	0.386074	1.30683	0.234454	1.6467	0.0996206
Y75B8A.31	nra-3	1012.11	920.639	1101.37	647.98	715.807	653.241	751.265	709.621	308.708	286.16	340.574	218.492	248.588	284.032	402.957	292.854	627.964		560.138	-0.589206	0.664709	0.217323	-2.7112	0.00670393	0.0462129		560.138	-0.469426	0.722252	0.243085	-1.93112	0.0534679	0.299914		560.138	-0.315732	0.803443	0.224646	-1.40547	0.159883	0.973655		560.138	0.50178	1.41596	0.222212	2.25811	0.0239387
Y41C4A.14	nas-37	617.501	581.99	707.665	435.932	522.804	384.26	502.199	506.247	0.989447	2.08876	3.64901	0.949966	0.890996	3.6768	3.96026	2.68673	4.51773		251.883	-0.507022	0.703673	0.187256	-2.70765	0.00677618	0.0466124		251.883	-0.33445	0.793087	0.209321	-1.59779	0.110091	0.399794		251.883	-0.228351	0.85361	0.851869	-0.268058	0.788654	0.983575		251.883	0.785068	1.72317	0.743116	1.05645	0.29076
ZK829.6	cysl-1	924.652	881.096	1150.21	744.635	743.379	733.753	833.609	792.719	347.296	293.471	288.272	256.491	279.773	331.831	380.185	306.288	347.865		566.795	-0.412133	0.751511	0.152224	-2.70742	0.00678085	0.0466124		566.795	-0.277121	0.825236	0.170232	-1.62791	0.103545	0.390347		566.795	-0.0991728	0.933568	0.161715	-0.613256	0.539707	0.973655		566.795	0.152639	1.1116	0.160679	0.949963	0.342131
EEED8.3	C17G10.1	6047.04	5138.54	6913.19	3471.67	3283.17	3388.8	3561.14	4053.26	342.349	242.296	364.901	231.792	253.934	309.77	399.986	257.926	889.992		2302.93	-0.835315	0.560461	0.308754	-2.70543	0.00682152	0.0467475		2302.93	-0.664145	0.631063	0.345206	-1.92391	0.0543662	0.302152		2302.93	-0.254859	0.838069	0.315896	-0.806781	0.419793	0.973655		2302.93	0.70567	1.6309	0.314059	2.24693	0.0246445
Y57G7A.10	ttc-4	2848.61	2799.43	2954.25	2311.82	2117.73	2128.98	2205	2355.2	990.437	946.209	1074.03	910.067	966.731	1046.97	1147.49	1062.16	1555.91		1730.65	-0.391353	0.762414	0.144677	-2.70501	0.00683021	0.0467475		1730.65	-0.330727	0.795136	0.16184	-2.04354	0.0409991	0.268863		1730.65	-0.0418137	0.971433	0.147559	-0.283369	0.776894	0.980517		1730.65	0.323314	1.2512	0.14708	2.19822	0.0279336
B0250.1	C17G10.6	8401.86	8964.06	7937.81	11661.7	10480.5	11474.7	10146.6	10167.6	12697.6	15736.7	16381.6	13571.2	12662.8	16016.1	11666.9	14305.1	10508.2		11928.3	0.409854	1.32855	0.151539	2.70461	0.00683854	0.0467475		11928.3	0.268105	1.20423	0.169458	1.58214	0.113618	0.407246		11928.3	-0.08501	0.942778	0.151375	-0.561586	0.574398	0.973655		11928.3	-0.296837	0.814035	0.1514	-1.96061	0.0499246
D2023.6	C17H11.2	632.432	574.892	841.225	463.547	518.562	414.451	611.991	595.906	407.652	334.202	329.627	264.09	322.541	314.366	389.096	343.006	563.812		465.965	-0.553462	0.681383	0.204586	-2.70528	0.00682464	0.0467475		465.965	-0.177288	0.884364	0.228116	-0.777181	0.437052	0.739492		465.965	-0.250618	0.840536	0.20873	-1.20068	0.229876	0.973655		465.965	0.273715	1.20892	0.207211	1.32095	0.186517
T05E11.4	C17H11.6	852.131	752.328	1019.64	495.108	531.288	457.452	605.891	637.456	164.248	155.613	155.691	122.546	106.92	119.496	166.331	148.666	467.133		409.29	-0.82267	0.565395	0.304342	-2.70311	0.00686949	0.0468447		409.29	-0.492697	0.710695	0.340018	-1.44903	0.147328	0.460327		409.29	-0.446973	0.73358	0.317256	-1.40887	0.158874	0.973655		409.29	0.718338	1.64529	0.312468	2.29892	0.0215095
F22D6.4	C17H12.10	1644.54	1524.93	1858.87	1100.68	1108.17	1244.27	1185.35	1186.35	931.07	923.233	1126.33	971.815	935.546	1286.88	1102.93	986.031	1704.09		1224.77	-0.542087	0.686777	0.20056	-2.70286	0.00687451	0.0468447		1224.77	-0.499229	0.707485	0.224402	-2.2247	0.0261011	0.229761		1224.77	0.100278	1.07198	0.201397	0.497913	0.618545	0.973655		1224.77	0.348298	1.27306	0.201175	1.73132	0.0833956
C15C6.4	ceh-48	711.353	605.31	815.31	417.193	425.242	426.345	424.937	495.313	2200.53	1534.2	1297.83	1659.59	1666.16	995.492	2199.92	1471.43	980.347		1078.03	-0.748774	0.595109	0.277064	-2.70253	0.00688136	0.0468447		1078.03	-0.627325	0.647376	0.309948	-2.02397	0.0429733	0.274137		1078.03	-0.220143	0.85848	0.273925	-0.803662	0.421592	0.973655		1078.03	-0.114039	0.923997	0.273876	-0.41639	0.677124
D2030.4	C18A11.1	2009.28	1956.86	2165.85	1457.71	1273.61	1546.19	1371.39	1505.62	1518.8	1495.55	1757.61	1469.6	1440.74	2106.8	1749.45	1769.66	2657.33		1720.71	-0.51943	0.697647	0.192286	-2.70134	0.00690601	0.0469065		1720.71	-0.506909	0.703728	0.215159	-2.35598	0.0184739	0.206379		1720.71	0.0725129	1.05155	0.192353	0.376978	0.70619	0.974801		1720.71	0.372528	1.29462	0.192175	1.93848	0.0525644
C56C10.8	C18A11.3	23986.6	20817.8	25656.4	14906.5	15680.9	15047.4	17258.8	18266.4	364.117	205.743	304.084	168.144	211.166	147.072	356.423	185.385	209.623		9045.44	-0.626686	0.647662	0.232045	-2.70071	0.00691907	0.0469065		9045.44	-0.403017	0.756275	0.25943	-1.55347	0.120311	0.416712		9045.44	-0.731241	0.602385	0.244916	-2.98568	0.00282949	0.973655		9045.44	-0.219896	0.858627	0.242745	-0.905871	0.365004
Y71G12B.24	xol-1	295.42	313.301	302.004	413.248	441.149	354.983	399.522	400.187	694.592	711.223	530.323	600.378	578.257	656.308	660.374	628.696	707.476		511.026	0.407895	1.32675	0.151018	2.70096	0.0069139	0.0469065		511.026	0.397293	1.31703	0.168948	2.35158	0.0186941	0.206379		511.026	-0.079192	0.946588	0.144808	-0.546875	0.584465	0.973655		511.026	0.0426407	1.03	0.144551	0.294988	0.768003
C56G7.1	damt-1	6978.09	6350.18	6893.26	5108.88	4594.95	5036.55	4983.36	5271.31	3578.83	3494.5	3820.51	3552.87	3083.74	3985.65	4140.45	3396.03	5617.34		4699.21	-0.456082	0.728963	0.168906	-2.7002	0.00692969	0.0469138		4699.21	-0.394658	0.76067	0.188879	-2.08948	0.0366646	0.258393		4699.21	-0.0363853	0.975095	0.169327	-0.214882	0.829859	0.991268		4699.21	0.272048	1.20752	0.169229	1.60757	0.107929
C30A5.7	C18A3.3	560.977	564.753	462.474	728.854	655.361	787.732	651.638	568.571	603.563	727.934	733.451	938.566	714.579	688.48	568.297	608.993	487.915		650.126	0.452268	1.36819	0.16788	2.694	0.00706002	0.0475342		650.126	0.205232	1.15287	0.188442	1.0891	0.276111	0.600853		650.126	0.18176	1.13427	0.166744	1.09006	0.275688	0.973655		650.126	-0.309837	0.806733	0.167772	-1.84677	0.06478
C53A5.1	osta-2	11955.4	10542.7	12662.2	8274.81	7926.9	7866.34	7827.79	9067.62	5385.56	5154.02	6341.98	4778.33	4690.2	6675.22	5975.04	5758.57	9653.48		7678.6	-0.546833	0.684521	0.202975	-2.69409	0.00705805	0.0475342		7678.6	-0.472374	0.720778	0.226951	-2.08139	0.0373978	0.259456		7678.6	-0.0644036	0.956341	0.203236	-0.316891	0.751326	0.978281		7678.6	0.341389	1.26698	0.203167	1.68034	0.0928912
F53G2.4	rab-3	369.008	338.649	208.313	537.518	551.436	402.558	455.435	425.335	314.644	443.862	325.978	436.034	469.555	364.922	271.278	400.323	196.973		383.048	0.70349	1.62844	0.261079	2.69454	0.00704854	0.0475342		383.048	0.529036	1.44296	0.292217	1.81042	0.0702303	0.334039		383.048	0.228191	1.17137	0.260841	0.874826	0.381668	0.973655		383.048	-0.320263	0.800924	0.262218	-1.22136	0.221948
Y37E11AR.6	hlh-14	872.394	972.349	836.241	1157.88	1168.62	1110.69	1194.5	1231.18	40.5673	48.0415	42.5718	65.5476	61.4788	50.5559	57.4238	48.3612	46.0808		529.676	0.358342	1.28195	0.133009	2.69412	0.00705749	0.0475342		529.676	0.440526	1.3571	0.14857	2.9651	0.00302586	0.121804		529.676	0.436304	1.35313	0.210193	2.07573	0.0379189	0.973655		529.676	0.207537	1.15472	0.214839	0.966012	0.334038
D2007.5	seb-3	2164.99	2074.48	2212.7	1649.05	1572.65	1673.36	1632.65	1677.29	1010.23	833.416	921.984	826.47	767.148	907.249	1106.89	794.378	1157.44		1351.9	-0.398376	0.758712	0.147913	-2.69332	0.0070744	0.0475659		1351.9	-0.378047	0.769478	0.165541	-2.28371	0.0223885	0.216354		1351.9	-0.145416	0.904119	0.150692	-0.964987	0.334551	0.973655		1351.9	0.144883	1.10564	0.15025	0.964277	0.334907
C30H6.8	dsc-1	354.077	308.231	410.645	208.103	207.849	256.173	223.651	255.857	255.277	262.14	317.464	208.042	258.389	297.82	328.702	275.838	584.594		294.874	-0.674149	0.626702	0.250364	-2.69268	0.00708807	0.0475927		294.874	-0.577429	0.670157	0.280387	-2.0594	0.039456	0.265624		294.874	-0.126181	0.916254	0.250688	-0.503339	0.614726	0.973655		294.874	0.511698	1.42573	0.24893	2.05559	0.0398217
F09F7.7	C18B12.6	919.32	843.581	1015.65	736.744	634.152	752.966	764.48	778.505	934.038	765.531	796.701	648.827	724.38	772.127	975.214	806.02	982.154		814.729	-0.387163	0.764632	0.143924	-2.69006	0.00714401	0.0479029		814.729	-0.263761	0.832914	0.160981	-1.63846	0.101327	0.388189		814.729	-0.21897	0.859178	0.144131	-1.51924	0.128702	0.973655		814.729	0.145906	1.10643	0.143463	1.01703	0.309139
C24G6.1	C18B2.1	638.831	566.781	749.527	349.14	339.345	320.216	386.307	382.692	116.755	132.636	166.638	84.5469	102.465	149.829	173.261	142.397	534.899		313.898	-0.954866	0.515889	0.355062	-2.68929	0.00716033	0.0479469		313.898	-0.761278	0.589973	0.397017	-1.91749	0.0551751	0.304746		313.898	-0.302836	0.810657	0.366124	-0.827141	0.408157	0.973655		313.898	1.03383	2.04745	0.361437	2.86032	0.00423215
C14B1.2	C18B2.3	921.453	857.776	1185.09	507.93	463.419	506.857	561.161	613.401	279.024	300.782	439.098	236.541	212.948	355.73	423.748	386.89	1480.01		572.462	-1.00383	0.498676	0.373543	-2.68731	0.007203	0.048167		572.462	-0.750691	0.594319	0.417577	-1.79773	0.0722196	0.336317		572.462	-0.338769	0.790716	0.376851	-0.898947	0.368681	0.973655		572.462	1.16979	2.24978	0.374811	3.12101	0.00180235
C34C12.3	C18B2.4	2660.91	2505.39	2858.57	1927.17	2026.53	1818.83	2155.18	2432.83	1815.64	1803.65	1802.61	1511.4	1674.18	1678.46	1818.75	1682.79	2875.99		2061.7	-0.475373	0.719281	0.177119	-2.68392	0.00727651	0.0485925		2061.7	-0.221723	0.857541	0.197942	-1.12014	0.262654	0.585941		2061.7	-0.156612	0.897129	0.177648	-0.88159	0.377999	0.973655		2061.7	0.2343	1.17634	0.177393	1.3208	0.18657
T09A5.7	C18B2.5	1060.1	928.75	1082.43	672.637	576.887	692.582	620.124	752.263	656.993	597.386	762.643	516.781	474.01	665.5	796.012	670.788	1484.53		765.318	-0.660987	0.632446	0.246423	-2.68232	0.00731129	0.0487172		765.318	-0.577356	0.670191	0.275699	-2.09415	0.0362463	0.257226		765.318	-0.283917	0.821358	0.247479	-1.14724	0.251284	0.973655		765.318	0.549687	1.46377	0.246465	2.23028	0.0257288
ZK1236.5	cft-1	180.238	157.157	187.382	114.407	114.529	136.321	130.124	109.341	285.95	253.785	308.95	262.191	286.901	384.225	320.781	371.665	392.139		235.064	-0.520941	0.696917	0.194225	-2.68215	0.00731501	0.0487172		235.064	-0.545509	0.68515	0.219724	-2.4827	0.0130393	0.186983		235.064	0.138375	1.10066	0.18097	0.76463	0.444492	0.973655		235.064	0.355485	1.27942	0.180227	1.97243	0.0485608
F22D6.3	glb-6	2371.89	2285.37	2746.94	1749.64	1995.78	1536.12	2054.54	2284.13	1211.08	1110.18	1361.08	1178.91	989.006	1319.97	1100.95	1070.22	1589.34		1644.42	-0.487634	0.713194	0.181855	-2.68144	0.00733052	0.0487177		1644.42	-0.186219	0.878906	0.203192	-0.916471	0.35942	0.679095		1644.42	-0.0780379	0.947345	0.183181	-0.426015	0.670097	0.974801		1644.42	0.0307654	1.02155	0.183087	0.168037	0.866554
C07H6.8	flp-4	1068.63	1075.77	1085.42	781.127	856.847	826.158	910.87	920.648	140.502	113.838	124.066	138.695	115.83	108.465	136.629	100.305	149.085		508.993	-0.390494	0.762868	0.145639	-2.68124	0.00733491	0.0487177		508.993	-0.233487	0.850577	0.162803	-1.43416	0.151526	0.464624		508.993	-0.0625869	0.957546	0.175867	-0.355876	0.721934	0.974801		508.993	0.0259526	1.01815	0.175114	0.148204	0.882182
Y57E12B.3	C18D11.1	274.09	251.452	146.517	390.563	296.927	362.302	239.917	206.654	313.655	417.752	291.921	425.585	357.29	310.689	263.357	256.135	183.42		293.425	0.6448	1.56352	0.240528	2.68077	0.0073454	0.0487215		293.425	-0.00341032	0.997639	0.272016	-0.0125372	0.989997	1		293.425	0.094892	1.06799	0.238059	0.398608	0.690182	0.974801		293.425	-0.543029	0.686328	0.240154	-2.26117	0.0237488
C16A3.7	maa-1	2342.03	2085.63	2396.1	1663.84	2014.86	1559.91	2105.37	2141.98	7767.16	6740.44	7300.46	6028.48	6769.79	6792.88	8067.05	7057.15	9250.5		4828.45	-0.381728	0.767518	0.142431	-2.6801	0.00736005	0.0487529		4828.45	-0.099045	0.933651	0.15908	-0.62261	0.533541	0.806252		4828.45	-0.154655	0.898347	0.14065	-1.09957	0.271518	0.973655		4828.45	0.160508	1.11768	0.140585	1.14171	0.253573
T12G3.8	C18D11.3	631.366	525.21	712.649	434.946	425.242	407.132	425.954	472.351	87.0714	65.796	75.4129	56.048	59.6968	70.7783	95.0463	60.0037	125.593		278.253	-0.560814	0.67792	0.209466	-2.67736	0.00742058	0.0490877		278.253	-0.472443	0.720743	0.234473	-2.01492	0.0439134	0.276509		278.253	-0.29253	0.816469	0.247423	-1.18231	0.237084	0.973655		278.253	0.295971	1.22771	0.240521	1.23054	0.218494
F36A2.9	rsp-8	2388.95	2174.86	2593.44	1695.4	1885.49	1638.59	1967.11	2035.92	1428.76	1447.51	1640.84	1401.2	1465.69	1473.48	1952.41	1408.74	2400.72		1823.48	-0.45565	0.729182	0.170371	-2.67445	0.00748514	0.049384		1823.48	-0.253385	0.838925	0.190433	-1.33057	0.18333	0.50351		1823.48	-0.0572887	0.961069	0.171099	-0.334828	0.737755	0.975883		1823.48	0.351369	1.27577	0.170791	2.05731	0.0396564
ZK973.10	C18D11.7	2461.47	2347.22	2780.83	1754.58	1518.57	1928.62	1706.87	1745.08	752.97	676.759	803.999	633.627	610.333	885.188	697.006	718.253	1154.73		1363.3	-0.544869	0.685454	0.203732	-2.67444	0.00748547	0.049384		1363.3	-0.551671	0.68223	0.227938	-2.42027	0.0155091	0.201664		1363.3	-0.0689184	0.953352	0.206735	-0.333366	0.738858	0.975883		1363.3	0.202855	1.15097	0.20638	0.982922	0.325646
T02G5.7	C18E3.1	3238.95	2865.34	3512.41	2351.27	2324.52	2150.02	2349.35	2672.28	1206.14	1211.48	1035.1	833.12	681.612	969.755	1084.12	866.919	1433.93		1810.96	-0.494595	0.709761	0.185194	-2.67069	0.00756954	0.0498717		1810.96	-0.352485	0.783234	0.207066	-1.70228	0.0887028	0.365738		1810.96	-0.475233	0.719351	0.187609	-2.5331	0.011306	0.973655		1810.96	-0.0288945	0.980171	0.187078	-0.154452	0.877253
F13B9.8	C18E3.3	1178.48	1074.75	1328.62	891.589	829.275	795.966	807.178	869.258	565.964	445.951	453.694	347.687	411.64	514.751	595.029	433.46	690.309		719.624	-0.509199	0.702613	0.190729	-2.66975	0.0075908	0.0499448		719.624	-0.510479	0.701989	0.213571	-2.39021	0.0168387	0.204649		719.624	-0.202603	0.868981	0.194948	-1.03927	0.298681	0.973655		719.624	0.228983	1.17201	0.193979	1.18045	0.237821
Y37D8A.18	hop-1	586.573	522.168	713.646	394.508	428.424	467.516	466.618	509.527	349.275	372.844	363.685	274.54	323.432	403.528	397.016	426.295	569.234		445.225	-0.497824	0.708174	0.186536	-2.66878	0.00761279	0.0500225		445.225	-0.316051	0.803265	0.208476	-1.51601	0.129517	0.433243		445.225	-0.116205	0.922611	0.189789	-0.612288	0.540347	0.973655		445.225	0.35959	1.28306	0.188407	1.90858	0.0563157
T20F10.2	sftd-3	1151.82	1029.13	1169.14	887.644	922.595	902.095	990.165	921.741	381.927	373.888	336.925	343.888	399.166	352.053	419.788	407.488	397.56		669.824	-0.304718	0.8096	0.114223	-2.66775	0.00763606	0.0501084		669.824	-0.223967	0.856208	0.12787	-1.75152	0.0798563	0.351308		669.824	0.00187418	1.0013	0.124326	0.0150747	0.987973	1		669.824	0.162588	1.11929	0.123647	1.31493	0.188532
Y6D11A.2	C18E9.2	2561.72	2560.15	2751.92	2010.02	1799.59	2182.05	1891.89	1996.56	1787.93	1665.79	1796.53	1569.34	1586.86	1869.65	2196.95	1765.18	2564.26		2032.73	-0.393915	0.761061	0.147723	-2.66657	0.00766286	0.0501837		2032.73	-0.432976	0.740732	0.165367	-2.61828	0.00883749	0.171106		2032.73	-0.0629498	0.957305	0.148387	-0.424228	0.6714	0.974801		2032.73	0.313927	1.24309	0.148102	2.11967	0.0340339
R144.5	szy-20	772.143	734.078	887.074	589.79	640.515	569.07	677.053	691.033	389.842	356.134	397.742	333.438	338.579	365.841	457.41	331.364	491.529		530.743	-0.412031	0.751565	0.15453	-2.66635	0.00766794	0.0501837		530.743	-0.222053	0.857345	0.172638	-1.28623	0.198363	0.521302		530.743	-0.139672	0.907725	0.160189	-0.871924	0.38325	0.973655		530.743	0.162664	1.11935	0.159145	1.02211	0.306727
F11D5.3	C18E9.4	1611.48	1834.18	1440.25	2250.67	1875.94	2108.85	1924.42	1906.9	2521.11	2636.02	2658.91	3222.28	2838.71	2876.17	2881.09	2579.26	2341.99		2324.01	0.352058	1.27638	0.132074	2.66561	0.00768493	0.050228		2324.01	0.234221	1.17627	0.14784	1.58429	0.113127	0.406536		2324.01	0.193408	1.14346	0.131072	1.47558	0.140055	0.973655		2324.01	-0.00259208	0.998205	0.131201	-0.0197566	0.984238
Y39A1A.1	C18E9.5	5987.31	5445.76	6310.18	4275.48	5052.01	3806.92	4901.01	5565.44	1868.08	1589.55	2041.01	1607.34	1563.7	1715.22	2168.24	1748.17	2517.28		3421.34	-0.434041	0.740186	0.162899	-2.66448	0.0077107	0.0503294		3421.34	-0.176574	0.884802	0.182083	-0.969742	0.332175	0.655665		3421.34	-0.170105	0.888778	0.164503	-1.03406	0.301109	0.973655		3421.34	0.226791	1.17023	0.164226	1.38097	0.167287
C42D8.8	tomm-40	7175.39	6934.19	4829.07	9941.61	9215.35	9001.74	9059.91	8425.79	13393.2	15626	12781.3	16253.9	15931.9	12116.9	12115.4	12848.9	7216.62		10756.9	0.57227	1.48686	0.214921	2.6627	0.00775171	0.0505		10756.9	0.469837	1.38495	0.240302	1.95519	0.0505605	0.291459		10756.9	0.0838623	1.05985	0.214715	0.390575	0.696112	0.974801		10756.9	-0.37734	0.769856	0.214755	-1.75707	0.0789052
T28F12.2	C18E9.7	4172.13	4335.52	3744.65	5928.48	6105.04	4645.88	6156.51	6334.1	5667.56	5010.94	5559.88	5498.4	4824.75	5519.79	6762.15	5001.8	4413.82		5275.38	0.444947	1.36126	0.167119	2.66245	0.00775738	0.0505		5275.38	0.612762	1.52918	0.186787	3.28054	0.00103608	0.0983518		5275.38	-0.035575	0.975643	0.167007	-0.213015	0.831315	0.991268		5275.38	-0.00548535	0.996205	0.167003	-0.0328459	0.973798
C44H4.5	C18E9.8	1013.17	999.724	994.718	782.113	759.285	886.542	842.758	813.494	387.863	363.445	377.065	321.088	373.327	381.467	392.066	411.966	382.2		616.606	-0.308158	0.807672	0.115796	-2.66122	0.00778585	0.0506183		616.606	-0.275579	0.826118	0.129815	-2.12286	0.0337654	0.250602		616.606	-0.0683462	0.953731	0.125006	-0.546742	0.584556	0.973655		616.606	0.0721101	1.05125	0.124411	0.579613	0.562175
M04B2.3	C18E9.9	2182.05	1811.87	2291.44	1241.72	1316.02	1489.46	1405.95	1586.53	1034.96	763.443	1016.86	683.975	739.527	851.178	1233.62	868.711	1982.38		1323.51	-0.634989	0.643946	0.238815	-2.65892	0.00783922	0.050898		1323.51	-0.485741	0.71413	0.26703	-1.81905	0.0689035	0.331409		1323.51	-0.307464	0.808061	0.240474	-1.27857	0.201048	0.973655		1323.51	0.537116	1.45107	0.239708	2.24071	0.0250447
Y63D3A.4	C18F10.2	627.1	596.185	701.685	432.973	470.842	387.919	469.668	511.714	837.073	616.185	814.946	612.728	589.84	663.662	1004.92	746.912	1490.85		680.894	-0.576047	0.670799	0.216858	-2.65633	0.0078996	0.0511649		680.894	-0.387192	0.764617	0.242396	-1.59735	0.110188	0.399944		680.894	-0.281306	0.822846	0.215285	-1.30667	0.191326	0.973655		680.894	0.515826	1.42981	0.214285	2.40719	0.0160756
R186.3	srg-3	2043.41	1868.65	1992.43	1445.87	1309.66	1602.91	1421.2	1532.96	1544.53	1362.92	1701.66	1420.2	1344.51	1733.61	1988.05	1586.07	2331.15		1660.58	-0.437728	0.738296	0.164791	-2.65627	0.00790115	0.0511649		1660.58	-0.414152	0.75046	0.184415	-2.24576	0.0247191	0.226149		1660.58	-0.0348309	0.976146	0.16504	-0.211046	0.832852	0.991268		1660.58	0.357776	1.28145	0.164742	2.17173	0.0298762
F39H2.2	C18F10.7	2267.37	2142.41	2292.44	1561.27	1422.07	1579.12	1561.49	1819.43	764.843	566.055	731.019	516.781	564.892	609.429	925.711	609.889	1246.89		1245.95	-0.554749	0.680775	0.208947	-2.65497	0.00793148	0.0512937		1245.95	-0.402338	0.756631	0.233625	-1.72215	0.0850421	0.357689		1245.95	-0.285853	0.820256	0.212405	-1.3458	0.178368	0.973655		1245.95	0.432451	1.34952	0.211374	2.04591	0.0407656
T13F2.7	nsy-7	4510.21	4062.77	4517.1	3029.82	3204.69	2917.63	3504.21	3623.55	622.362	428.196	491.4	449.334	410.749	428.347	783.142	421.817	683.984		2005.25	-0.516328	0.699149	0.194547	-2.654	0.00795449	0.051375		2005.25	-0.291997	0.816771	0.21748	-1.34264	0.179389	0.500035		2005.25	-0.259869	0.835164	0.201018	-1.29276	0.196093	0.973655		2005.25	0.291562	1.22396	0.199867	1.45878	0.144625
Y11D7A.10	C18G1.1	1550.69	1479.31	1609.69	1146.05	923.656	1169.25	1017.61	1140.42	422.494	351.956	388.012	278.34	286.901	391.579	402.957	432.564	658.685		802.95	-0.518239	0.698224	0.195339	-2.65302	0.0079776	0.0513891		802.95	-0.519457	0.697634	0.218647	-2.37578	0.0175121	0.205487		802.95	-0.281012	0.823013	0.202491	-1.38778	0.165204	0.973655		802.95	0.362515	1.28566	0.200738	1.80591	0.0709324
Y53F4B.20	C18H7.1	165.307	180.478	139.54	264.321	219.514	197.619	249.066	217.588	427.441	576.498	439.098	569.029	465.1	571.742	397.016	385.098	396.657		344.771	0.489453	1.40391	0.184462	2.6534	0.00796845	0.0513891		344.771	0.529453	1.44338	0.205833	2.57225	0.010104	0.181163		344.771	0.153602	1.11234	0.171365	0.896339	0.370072	0.973655		344.771	-0.292288	0.816606	0.17267	-1.69276	0.090501
C34D4.12	C18H9.1	2368.69	2246.85	2693.12	1606.64	1471.91	1628.53	1566.57	1754.92	1193.27	881.458	1155.52	715.324	790.314	1106.72	1580.14	1032.6	2245.31		1531.64	-0.634736	0.644059	0.239393	-2.65144	0.0080149	0.051404		1531.64	-0.552872	0.681662	0.267729	-2.06505	0.0389185	0.263886		1531.64	-0.306188	0.808776	0.240855	-1.27125	0.203639	0.973655		1531.64	0.588797	1.50399	0.24016	2.45169	0.0142186
C46F11.2	gyf-1	4909.08	4647.81	5094.19	3171.85	3699.93	2909.39	3438.13	3837.86	1624.67	1196.86	1732.06	1249.2	1201.95	1544.25	1975.18	1331.72	2664.56		2719.34	-0.583005	0.667572	0.219876	-2.65152	0.00801307	0.051404		2719.34	-0.424856	0.744913	0.245834	-1.72822	0.0839489	0.357002		2719.34	-0.188488	0.877525	0.221278	-0.851814	0.394317	0.973655		2719.34	0.391246	1.31153	0.220927	1.77093	0.0765729
Y48C3A.10	C18H9.5	945.982	884.138	1025.62	642.062	592.794	751.136	633.34	693.219	677.772	558.744	648.308	530.081	539.053	709.621	734.628	601.828	1032.75		717.71	-0.523587	0.69564	0.197398	-2.65245	0.00799102	0.051404		717.71	-0.521374	0.696708	0.221095	-2.35815	0.0183665	0.206379		717.71	-0.0835121	0.943757	0.198637	-0.420427	0.674174	0.974801		717.71	0.330096	1.2571	0.197981	1.66731	0.0954533
F55A4.1	rpy-1	1578.41	1502.63	1691.42	1143.09	1117.72	1268.97	1157.9	1261.79	746.043	591.12	643.442	577.579	625.479	758.339	852.446	620.635	890.896		1001.64	-0.434985	0.739702	0.164074	-2.65115	0.00802175	0.051404		1001.64	-0.395071	0.760452	0.183626	-2.1515	0.0314367	0.245876		1001.64	-0.0143874	0.990077	0.167346	-0.085974	0.931487	0.994499		1001.64	0.254591	1.193	0.166874	1.52565	0.127098
Y46H3A.7	ift-74	564.177	553.6	627.928	460.589	412.517	454.707	504.232	467.978	532.323	479.371	544.919	474.983	482.92	628.732	566.317	509.584	620.736		522.683	-0.394447	0.760781	0.14886	-2.64978	0.00805443	0.0515462		522.683	-0.2594	0.835435	0.166489	-1.55806	0.119219	0.415555		522.683	0.0280078	1.0196	0.148475	0.188636	0.850378	0.991268		522.683	0.124627	1.09023	0.148251	0.840651	0.400544
T22B11.4	fln-2	415.934	311.273	288.05	520.751	527.046	472.09	465.601	376.132	1433.71	1829.76	1592.19	1877.13	2082.26	1717.98	1020.76	1751.75	1030.04		1041.91	0.582488	1.49743	0.219967	2.64807	0.00809529	0.0516822		1041.91	0.315539	1.24448	0.246727	1.2789	0.200932	0.522878		1041.91	0.225614	1.16928	0.21385	1.05501	0.29142	0.973655		1041.91	-0.352438	0.783259	0.214251	-1.64498	0.0999735
T20H4.5	C23F12.4	3650.62	3476.73	4229.05	2543.59	2498.43	2736.48	2571.99	2732.42	1265.5	1215.66	1245.53	1029.76	996.134	1563.56	1157.39	1076.48	1807.99		2105.72	-0.545917	0.684956	0.206161	-2.64801	0.00809671	0.0516822		2105.72	-0.513315	0.700611	0.230575	-2.22624	0.0259983	0.229761		2105.72	-0.0541441	0.963166	0.207819	-0.260535	0.794451	0.98466		2105.72	0.11724	1.08466	0.207687	0.564505	0.572411
Y51H7C.11	C23G10.10	608.969	696.563	577.096	829.454	949.107	732.838	895.621	946.89	38.5885	40.7309	41.3555	37.0487	41.8768	41.3639	54.4536	42.9877	40.6596		389.153	0.415118	1.33341	0.156838	2.64679	0.00812605	0.0518022		389.153	0.553785	1.46793	0.175024	3.16406	0.00155585	0.0989731		389.153	-0.0015901	0.998898	0.239099	-0.0066504	0.994694	1		389.153	0.191925	1.14229	0.235176	0.816091	0.414448
B0252.4	C23G10.2	1582.68	1482.35	1899.73	1057.28	944.865	1026.52	1019.65	1178.69	427.441	337.335	446.396	289.74	338.579	451.327	593.049	380.621	1014.68		851.232	-0.713014	0.610044	0.269787	-2.64288	0.0082205	0.0522688		851.232	-0.590446	0.664138	0.301703	-1.95704	0.0503427	0.29135		851.232	-0.165415	0.891672	0.27443	-0.602759	0.546669	0.973655		851.232	0.715572	1.64213	0.272968	2.62145	0.00875556
W05H7.3	rps-3	359.409	334.593	403.668	241.636	227.998	276.301	271.431	288.659	407.652	273.628	392.877	281.19	272.645	394.336	428.698	346.589	519.539		336.521	-0.556599	0.679903	0.210591	-2.64304	0.00821663	0.0522688		336.521	-0.386053	0.76522	0.235436	-1.63974	0.10106	0.387959		336.521	-0.179632	0.882928	0.209213	-0.858611	0.390555	0.973655		336.521	0.269895	1.20572	0.207953	1.29786	0.194335
C25A1.12	C23G10.7	2358.02	2280.3	2516.7	1646.09	1691.42	1505.02	1793.28	1946.26	716.36	560.833	712.774	495.882	576.475	649.874	934.622	599.142	1255.02		1308.12	-0.563282	0.676761	0.21334	-2.64031	0.00828311	0.0525988		1308.12	-0.351181	0.783942	0.238484	-1.47256	0.140871	0.451476		1308.12	-0.208181	0.865628	0.216877	-0.959902	0.337105	0.973655		1308.12	0.487021	1.40155	0.215912	2.25565	0.0240925
C03C10.3	C23G10.8	28083	26551.5	29661.1	19471.9	19918.5	16729.9	20055.4	22459.7	4541.56	2849.07	3702.53	2548.76	2554.49	3549.03	5142.4	2854.21	4730.06		12670.8	-0.586943	0.665752	0.222362	-2.63958	0.00830087	0.0526436		12670.8	-0.402526	0.756533	0.248607	-1.61912	0.105421	0.392719		12670.8	-0.358563	0.779941	0.223176	-1.60664	0.108134	0.973655		12670.8	0.198072	1.14716	0.223021	0.888134	0.374468
ZC262.3	egl-26	4921.88	4983.41	5463.97	4168.97	4537.68	3818.81	4615.35	5059.19	325.528	334.202	328.411	322.988	305.612	346.538	328.702	303.601	315.337		2381.19	-0.295378	0.814859	0.111924	-2.63908	0.00831303	0.0526528		2381.19	-0.0829131	0.944149	0.125084	-0.662859	0.507421	0.787216		2381.19	-0.0192817	0.986724	0.128316	-0.150267	0.880554	0.993187		2381.19	-0.0608494	0.9587	0.128619	-0.473097	0.636144
C07D10.5	C23H3.2	7962.46	6949.4	8431.19	5633.58	5902.49	5881	6395.41	6942.04	4589.06	3209.38	3613.74	3143.44	3378.66	3812.84	5238.44	3907.41	4740		5278.27	-0.422493	0.746134	0.160151	-2.63809	0.00833745	0.0527395		5278.27	-0.222568	0.857039	0.179039	-1.24313	0.213821	0.533243		5278.27	-0.143165	0.905531	0.160692	-0.890927	0.372968	0.973655		5278.27	0.282834	1.21658	0.160549	1.76167	0.0781248
ZK20.5	ascc-1	3819.12	3497.01	4296.82	2248.7	2261.95	2118	2421.53	2733.52	288.919	304.959	377.065	246.991	205.82	392.498	423.748	283.898	883.668		1576.72	-0.808969	0.57079	0.306728	-2.63742	0.00835401	0.0527763		1576.72	-0.586739	0.665846	0.342921	-1.711	0.0870807	0.362478		1576.72	-0.199281	0.870985	0.313331	-0.636007	0.524772	0.973655		1576.72	0.713658	1.63996	0.311652	2.28992	0.0220258
M88.2	cab-1	687.89	698.59	834.248	550.339	533.409	590.113	619.107	583.879	439.315	461.616	394.093	425.585	441.934	501.883	409.887	493.463	585.498		544.168	-0.407713	0.753817	0.154617	-2.63692	0.00836626	0.0527859		544.168	-0.299521	0.812522	0.173015	-1.73118	0.0834194	0.357002		544.168	0.079669	1.05678	0.157655	0.505339	0.613321	0.973655		544.168	0.201076	1.14956	0.157339	1.27799	0.201255
C23G10.7	C23H4.8	1627.47	1484.38	1842.92	1178.59	1173.92	1047.57	1196.53	1328.49	898.418	725.845	857.518	723.874	740.418	786.834	1022.74	675.266	1380.62		1099.49	-0.543387	0.686158	0.206177	-2.63554	0.00840035	0.0528676		1099.49	-0.387661	0.764368	0.230527	-1.68163	0.0926404	0.372971		1099.49	-0.140686	0.907088	0.207925	-0.67662	0.498647	0.973655		1099.49	0.3109	1.24048	0.20739	1.49911	0.133846
R148.5	C23H5.15	3372.26	3441.24	2603.41	4932.34	4565.26	4314.69	4783.09	4965.16	3887.54	3955.07	4223.12	5454.7	3537.26	3270.51	4655.29	3345.88	2914.84		4013.04	0.552645	1.46677	0.209691	2.63552	0.00840074	0.0528676		4013.04	0.634876	1.5528	0.234405	2.70847	0.00675952	0.156878		4013.04	0.0233208	1.0163	0.209614	0.111256	0.911413	0.994499		4013.04	-0.144535	0.904671	0.209664	-0.689364	0.490594
K02B7.3	C23H5.8	1834.37	1779.43	2035.29	1314.7	1258.76	1588.27	1288.03	1332.86	1522.76	1335.76	1425.55	1249.2	1258.09	1562.64	1640.54	1405.16	2112.49		1526.11	-0.440574	0.736841	0.167195	-2.63509	0.0084116	0.0528683		1526.11	-0.523069	0.69589	0.187268	-2.79316	0.00521954	0.145601		1526.11	-0.0740372	0.949976	0.167569	-0.44183	0.658612	0.974801		1526.11	0.267852	1.20401	0.167285	1.60118	0.109338
T04F8.1	grl-20	493.788	444.097	590.053	348.154	399.791	305.578	426.97	462.511	497.692	454.306	513.294	417.035	386.692	584.61	430.678	509.584	663.202		466.355	-0.537383	0.68902	0.204055	-2.63352	0.00845061	0.0530058		466.355	-0.195892	0.873033	0.22744	-0.861288	0.389079	0.701998		466.355	-0.0776337	0.947611	0.202998	-0.382436	0.702138	0.974801		466.355	0.130759	1.09487	0.202571	0.645498	0.518605
B0334.11	flp-24	1441.9	1297.82	1720.32	1024.74	1159.08	860.925	1258.55	1313.18	25.7256	24.0208	17.0287	13.2995	18.7109	19.3032	17.8212	13.4337	35.2383		603.594	-0.551105	0.682497	0.20928	-2.63334	0.00845504	0.0530058		603.594	-0.209431	0.864878	0.233748	-0.89597	0.370269	0.687022		603.594	-0.389675	0.763302	0.33642	-1.1583	0.246742	0.973655		603.594	-0.0149629	0.989682	0.323951	-0.0461887	0.96316
F23H11.5	elf-1	7743.83	6740.54	7832.16	5101.98	5015.95	5160.97	5069.77	5738.2	3051.46	2839.67	3385.07	2620.96	2443.11	4014.14	2934.55	3110.34	4738.19		4561.23	-0.546563	0.684649	0.207636	-2.63232	0.00848047	0.0530975		4561.23	-0.461073	0.726446	0.232168	-1.98595	0.047039	0.282444		4561.23	-0.0310475	0.978709	0.208174	-0.149142	0.881442	0.993187		4561.23	0.217314	1.16257	0.208099	1.04428	0.296355
ZC410.2	sel-15	632.432	588.073	713.646	520.751	492.051	471.176	500.165	530.302	201.847	179.634	184.883	191.893	186.218	238.992	223.755	216.73	263.835		372.728	-0.382564	0.767073	0.145405	-2.63102	0.00851288	0.0532326		372.728	-0.323784	0.798972	0.162951	-1.987	0.0469225	0.282129		372.728	0.122715	1.08878	0.160397	0.765071	0.444229	0.973655		372.728	0.313919	1.24308	0.159279	1.97088	0.0487376
C03E10.4	frm-4	2686.5	2504.38	3019.04	1929.15	1913.06	1733.74	2062.67	2217.43	1328.83	1327.41	1671.25	1289.1	1280.36	1308.02	1613.81	1390.83	2795.57		1886.54	-0.558222	0.679138	0.21227	-2.62978	0.00854401	0.0533593		1886.54	-0.354805	0.781975	0.237298	-1.49519	0.134865	0.441394		1886.54	-0.158088	0.896212	0.213178	-0.741578	0.458343	0.973655		1886.54	0.42299	1.3407	0.212802	1.98772	0.0468427
F39H2.4	C24A3.1	161.041	127.754	159.474	65.0939	82.7155	86.001	78.2779	82.0055	150.396	154.568	207.994	96.8965	123.848	138.799	242.566	169.264	627.061		161.986	-0.938727	0.521693	0.357052	-2.62911	0.00856095	0.0533973		161.986	-0.89884	0.536318	0.401108	-2.24089	0.025033	0.227211		161.986	-0.510978	0.701747	0.351658	-1.45305	0.146209	0.973655		161.986	1.01988	2.02775	0.3467	2.94168	0.0032644
F13E6.5	twk-18	1164.61	1125.45	1338.58	879.754	905.628	884.712	885.455	969.851	786.611	580.676	654.389	590.879	494.503	661.823	783.142	600.037	840.297		832.142	-0.442661	0.735776	0.168437	-2.62805	0.00858756	0.0534954		832.142	-0.383018	0.766832	0.188517	-2.03175	0.0421793	0.272373		832.142	-0.211169	0.863837	0.17095	-1.23527	0.21673	0.973655		832.142	0.136583	1.0993	0.170288	0.802071	0.422512
C36B1.3	C24B5.1	3931.11	3443.27	4187.19	2729.01	2667.04	2521.48	2859.69	3111.83	1897.76	1385.89	1797.75	1294.8	1345.4	1790.6	2393.98	1694.43	3121.75		2480.76	-0.546239	0.684803	0.207904	-2.62736	0.00860501	0.0535241		2480.76	-0.368231	0.774732	0.232438	-1.58421	0.113146	0.406536		2480.76	-0.197608	0.871995	0.20894	-0.945766	0.344268	0.973655		2480.76	0.504828	1.41895	0.208548	2.42068	0.0154913
ZK632.14	spas-1	569.509	511.015	675.771	347.167	341.466	466.601	386.307	392.533	235.488	226.631	278.541	190.943	192.455	227.961	337.612	248.075	509.6		361.04	-0.603675	0.658075	0.229828	-2.62664	0.00862329	0.0535241		361.04	-0.588294	0.665129	0.257526	-2.2844	0.022348	0.216354		361.04	-0.275589	0.826113	0.236653	-1.16453	0.24421	0.973655		361.04	0.565741	1.48015	0.23375	2.42029	0.0155083
C01G10.8	ptr-1	6743.46	6112.92	6837.44	4826.81	4541.93	4328.41	4946.76	5217.73	1813.66	1474.67	1843.97	1281.5	1405.99	1480.83	2270.22	1542.19	3102.78		3515.96	-0.523878	0.6955	0.199465	-2.62642	0.00862892	0.0535241		3515.96	-0.369251	0.774184	0.223012	-1.65574	0.0977735	0.381323		3515.96	-0.300006	0.812249	0.201064	-1.49209	0.135675	0.973655		3515.96	0.430251	1.34747	0.200617	2.14465	0.0319812
C15C8.4	C24B5.4	1656.27	1403.26	1826.97	1077.99	1165.44	1075.01	1311.41	1378.79	903.366	592.164	919.551	568.079	673.593	798.784	1118.77	771.093	1284.84		1089.73	-0.558386	0.679061	0.212695	-2.62529	0.00865751	0.0535241		1089.73	-0.276173	0.825779	0.23766	-1.16205	0.245214	0.570591		1089.73	-0.24276	0.845127	0.214605	-1.1312	0.257973	0.973655		1089.73	0.394771	1.31473	0.213837	1.84613	0.064873
F13E6.1	C24B9.3	5573.51	5481.25	5747.04	4688.73	4650.09	4547.07	4682.44	4840.51	2988.13	2872.05	2896.1	2876.5	2595.47	3305.44	3233.55	3015.41	3186.81		3951.77	-0.275024	0.826437	0.104731	-2.626	0.00863938	0.0535241		3951.77	-0.234205	0.850154	0.117152	-1.99915	0.045592	0.279426		3951.77	0.0033685	1.00234	0.105684	0.0318732	0.974573	1		3951.77	0.107716	1.07752	0.105622	1.01982	0.307813
F36A2.7	C24D10.4	9771.24	8567.62	11510	7626.83	7780.55	7287.21	7534	8198.36	5802.12	5107.02	6014.79	5482.25	4953.94	6578.71	5780.99	5545.42	6739.55		7075.33	-0.395358	0.760301	0.150593	-2.62534	0.00865622	0.0535241		7075.33	-0.339009	0.790584	0.168393	-2.0132	0.0440937	0.276509		7075.33	0.00777156	1.0054	0.150871	0.0515114	0.958918	0.999165		7075.33	0.0942736	1.06753	0.150853	0.624939	0.532011
C06A6.3	tram-1	1820.51	1645.59	2080.14	1361.05	1364.8	1220.48	1395.79	1604.03	1032.98	851.171	1001.05	832.17	839.319	981.704	1206.89	902.742	1579.4		1277.64	-0.491139	0.711463	0.187169	-2.62405	0.00868916	0.0536523		1277.64	-0.301806	0.811236	0.209225	-1.4425	0.149162	0.461907		1277.64	-0.120877	0.919629	0.188758	-0.64038	0.521926	0.973655		1277.64	0.354619	1.27865	0.188235	1.88392	0.059576
M142.6	nas-12	1128.35	1368.79	971.794	1616.5	1854.73	1307.4	1890.87	1923.3	3037.6	2561.87	2917.99	2831.85	2670.32	2452.42	3633.54	2700.17	2831.71		2217.6	0.46179	1.37725	0.176032	2.62333	0.00870761	0.0536988		2217.6	0.721854	1.6493	0.196516	3.67326	0.00023948	0.0769616		2217.6	-0.0986455	0.933909	0.174492	-0.56533	0.571849	0.973655		2217.6	0.10566	1.07599	0.174407	0.605822	0.544633
Y67D8C.9	syp-2	766.811	821.275	733.58	1073.06	1073.18	967.968	1023.71	979.692	1290.24	1580.15	1429.2	1707.09	1726.75	1592.05	1397.97	1457.11	948.723		1209.92	0.423538	1.34121	0.161532	2.622	0.00874146	0.0538399		1209.92	0.372335	1.29445	0.180713	2.06037	0.0393635	0.265428		1209.92	0.225279	1.169	0.159432	1.413	0.157655	0.973655		1209.92	-0.176822	0.884649	0.159832	-1.1063	0.268598
Y43C5A.5	hir-1	2887.01	2725.42	3094.79	2021.86	1967.14	2044.81	2067.76	2158.38	940.965	811.484	1005.91	664.026	752.001	990.896	1091.05	928.714	1662.52		1636.16	-0.529127	0.692974	0.201909	-2.62062	0.00877691	0.0539906		1636.16	-0.457935	0.728028	0.225813	-2.02793	0.0425669	0.273234		1636.16	-0.196293	0.87279	0.204437	-0.960163	0.336973	0.973655		1636.16	0.417151	1.33529	0.203775	2.04711	0.0406469
C25H3.9	mms-19	5236.5	5179.1	5753.02	3965.8	3821.88	3666.93	3837.65	4245.7	2082.79	2115.92	2380.37	2058.58	1740.12	2780.58	2091.02	2085.8	3138.92		3304.74	-0.497292	0.708435	0.189815	-2.61987	0.00879621	0.0540417		3304.74	-0.415245	0.749892	0.212254	-1.95636	0.0504226	0.29135		3304.74	0.000155064	1.00011	0.190662	0.00081329	0.999351	1		3304.74	0.153348	1.11215	0.190593	0.804587	0.421058
Y71H2B.2	nhr-47	3105.64	2522.63	3125.69	1939.01	2243.92	1779.49	2360.54	2473.28	925.133	769.709	918.335	703.925	763.584	795.107	1270.25	764.823	1578.49		1649.39	-0.554154	0.681056	0.211813	-2.61624	0.00889046	0.0545526		1649.39	-0.271814	0.828277	0.236735	-1.14818	0.250895	0.575564		1649.39	-0.207669	0.865935	0.214442	-0.968416	0.332837	0.973655		1649.39	0.467625	1.38283	0.213716	2.18807	0.0286648
F57B10.9	hpo-15	680.425	578.948	675.771	438.891	485.688	437.324	529.647	551.077	1024.08	895.035	1178.63	874.918	899.015	1178.41	1158.38	1129.32	1750.17		850.925	-0.50706	0.703655	0.194113	-2.61219	0.00899651	0.0550658		850.925	-0.255498	0.837698	0.216726	-1.1789	0.238438	0.562726		850.925	-0.0689004	0.953364	0.190905	-0.360915	0.718163	0.974801		850.925	0.382961	1.30402	0.190461	2.01071	0.044356
F49E8.7	grl-1	1199.81	1097.06	1361.51	926.109	1010.61	907.585	1095.89	1162.29	1232.85	1033.94	1164.03	1017.41	1017.52	1012.96	1449.46	1089.02	1292.07		1121.77	-0.363495	0.777279	0.139148	-2.61229	0.00899369	0.0550658		1121.77	-0.111265	0.925776	0.155326	-0.71633	0.473787	0.76358		1121.77	-0.170783	0.88836	0.139073	-1.22801	0.219444	0.973655		1121.77	0.158606	1.11621	0.13863	1.14409	0.252587
CD4.3	C24G6.8	977.977	893.263	962.824	718.005	608.701	741.987	627.24	692.126	1418.87	1281.46	1541.1	1285.3	1251.85	1619.63	1706.87	1513.53	2279.65		1183.55	-0.453668	0.730184	0.173719	-2.6115	0.0090145	0.0551073		1183.55	-0.518216	0.698235	0.194828	-2.65986	0.00781731	0.165461		1183.55	-0.0288455	0.980204	0.171536	-0.16816	0.866457	0.993004		1183.55	0.375196	1.29702	0.171218	2.19133	0.0284278
Y57G11C.12	clc-7	5146.91	5006.73	5404.17	3864.21	3433.75	3849	3564.19	3893.62	1535.62	1465.27	1777.07	1460.1	1284.82	1818.18	1826.67	1590.55	2619.38		2914.13	-0.48095	0.716506	0.184228	-2.61062	0.00903779	0.0551538		2914.13	-0.475885	0.719026	0.206046	-2.30961	0.0209098	0.213136		2914.13	-0.0661585	0.955178	0.185769	-0.356133	0.721741	0.974801		2914.13	0.337667	1.26371	0.185502	1.82029	0.0687154
F59C6.5	C24H10.2	4038.82	3752.52	4249.98	3175.79	3019.11	2951.48	3025.39	3238.67	2661.61	2460.56	2549.44	2333.12	2199.87	2864.22	2646.44	2556.87	3606.95		3019.46	-0.396739	0.759573	0.151986	-2.61037	0.00904454	0.0551538		3019.46	-0.357902	0.780299	0.17	-2.1053	0.0352652	0.253712		3019.46	-0.0525971	0.964199	0.152481	-0.344941	0.730139	0.975883		3019.46	0.199699	1.14846	0.152353	1.31077	0.189937
Y95D11A.1	C24H10.3	755.08	636.741	704.675	477.355	415.698	570.9	475.767	471.258	183.048	196.344	180.018	125.395	176.417	201.305	230.685	186.28	295.459		369.554	-0.517214	0.69872	0.198196	-2.60961	0.00906468	0.055208		369.554	-0.561424	0.677633	0.22229	-2.52563	0.0115491	0.185416		369.554	-0.152572	0.899645	0.211397	-0.721732	0.470459	0.973655		369.554	0.348498	1.27323	0.208807	1.66899	0.0951194
C39E9.10	cal-5	132.246	132.823	128.576	215.007	170.733	172.917	186.037	160.731	238.457	322.714	323.546	402.785	297.593	409.043	229.695	237.328	259.318		236.444	0.505257	1.41938	0.193715	2.60825	0.00910074	0.0553591		236.444	0.403013	1.32227	0.217449	1.85337	0.0638295	0.32323		236.444	0.327892	1.25518	0.180841	1.81315	0.069809	0.973655		236.444	-0.282383	0.822232	0.183411	-1.53961	0.123654
K12C11.4	immp-1	903.323	1003.78	686.734	1386.7	1323.45	1224.14	1132.49	957.824	828.168	1132.11	1008.34	1214.06	1042.47	853.936	840.565	977.075	502.371		1001.03	0.601046	1.51682	0.230515	2.6074	0.00912315	0.0554268		1001.03	0.273794	1.20898	0.258096	1.06082	0.288771	0.612415		1001.03	0.0674274	1.04785	0.23058	0.292425	0.769961	0.979046		1001.03	-0.355592	0.781549	0.231053	-1.53901	0.123802
C25G4.3	twk-39	435.131	414.693	473.438	296.868	272.537	338.514	349.709	276.632	399.737	290.338	398.959	276.44	302.939	295.063	457.41	382.412	666.817		372.214	-0.54274	0.686466	0.20826	-2.60607	0.00915882	0.0555063		372.214	-0.493538	0.710281	0.23343	-2.11429	0.0344907	0.252639		372.214	-0.315999	0.803295	0.209183	-1.51064	0.130881	0.973655		372.214	0.468943	1.3841	0.207007	2.26535	0.0234912
R07E4.6	mdt-21	1306.46	1184.26	1079.44	1585.92	1799.59	1469.34	1738.38	1477.19	3660.96	4469.95	3906.87	4829.63	4537.84	4286.22	3346.42	4088.31	2631.12		2788.11	0.443357	1.35976	0.170119	2.60616	0.00915637	0.0555063		2788.11	0.434315	1.35127	0.19021	2.28335	0.0224097	0.216354		2788.11	0.181713	1.13423	0.168067	1.08119	0.279611	0.973655		2788.11	-0.258084	0.836198	0.168222	-1.53418	0.124984
H43I07.2	C24H12.4	1262.73	1319.11	1506.03	1000.08	1079.54	963.394	1095.89	1266.16	1104.22	955.609	1076.46	929.066	786.75	1049.73	1216.79	898.265	1272.19		1104.82	-0.426157	0.744242	0.163701	-2.60327	0.00923402	0.0558931		1104.82	-0.206624	0.866563	0.1829	-1.12971	0.258599	0.582527		1104.82	-0.181568	0.881744	0.164352	-1.10475	0.269268	0.973655		1104.82	0.110916	1.07991	0.163983	0.676387	0.498795
T07E3.3	dnsn-1	967.312	863.859	1285.76	586.831	601.278	468.431	719.75	708.527	296.834	343.601	456.126	282.14	284.228	395.255	422.758	387.785	1335.44		612.113	-0.912164	0.531387	0.350718	-2.60085	0.00929936	0.0561176		612.113	-0.540921	0.687332	0.391879	-1.38032	0.167487	0.484509		612.113	-0.188664	0.877418	0.353732	-0.533354	0.593788	0.973655		612.113	0.969664	1.95838	0.352188	2.75326	0.00590055
F54C9.2	C25A1.1	1951.69	1845.33	1999.4	1640.17	1464.49	1588.27	1566.57	1633.55	870.714	890.857	959.69	840.72	964.058	966.078	1078.18	1105.14	1298.4		1333.14	-0.304497	0.809725	0.11709	-2.60053	0.009308	0.0561176		1333.14	-0.272148	0.828086	0.13109	-2.07604	0.0378907	0.260636		1333.14	0.0268702	1.0188	0.120097	0.223737	0.822962	0.989351		1333.14	0.356372	1.2802	0.119532	2.98138	0.00286949
R13.4	dao-5	3373.33	3705.88	3229.35	4355.37	4759.32	4103.34	4620.43	4589.03	2592.35	2924.27	2915.56	3230.83	3069.48	2863.3	2789.01	2905.25	2116.1		3420.13	0.35858	1.28216	0.137909	2.60012	0.00931899	0.0561176		3420.13	0.422313	1.34007	0.154162	2.73941	0.00615501	0.151962		3420.13	0.120125	1.08683	0.138321	0.868454	0.385146	0.973655		3420.13	-0.110452	0.926298	0.138461	-0.797713	0.425037
Y106G6E.4	aha-1	407.402	377.178	454.501	306.73	252.388	367.791	308.029	295.22	166.227	166.057	167.855	150.095	143.45	160.86	175.242	169.264	196.069		250.845	-0.416689	0.749142	0.160278	-2.59979	0.0093282	0.0561176		250.845	-0.453437	0.730301	0.180429	-2.51311	0.0119672	0.185416		250.845	-0.138358	0.908553	0.174549	-0.792658	0.427977	0.973655		250.845	0.112578	1.08116	0.172716	0.651811	0.514523
K04G2.3	lid-1	781.742	757.398	853.185	653.898	661.724	583.709	732.966	704.154	375.001	347.779	375.848	378.086	349.271	343.78	430.678	352.858	343.347		530.907	-0.333604	0.793551	0.128309	-2.60001	0.00932216	0.0561176		530.907	-0.150256	0.90109	0.143288	-1.04863	0.294346	0.618284		530.907	-0.0365071	0.975013	0.135375	-0.269673	0.787411	0.983415		530.907	0.0356402	1.02501	0.135117	0.263773	0.791955
F23F1.8	mrpl-34	4650.99	4353.77	5259.65	3089	3205.75	2774.9	3095.54	3448.6	621.373	657.96	733.451	591.829	504.304	672.854	783.142	512.271	1357.13		2136.03	-0.653343	0.635805	0.251405	-2.59877	0.00935595	0.0562156		2136.03	-0.539209	0.688148	0.281106	-1.91817	0.0550896	0.304672		2136.03	-0.186036	0.879017	0.255012	-0.72952	0.465683	0.973655		2136.03	0.398564	1.31819	0.254319	1.56718	0.117072
F28F9.1	tag-72	1023.84	1102.13	857.172	1623.4	1503.72	1386.08	1481.18	1453.14	966.69	1210.44	1105.65	1613.99	1247.39	998.25	1092.04	1062.16	571.944		1194.07	0.597324	1.51291	0.229886	2.59835	0.00936736	0.0562156		1194.07	0.561215	1.47551	0.257021	2.18354	0.0289961	0.239759		1194.07	0.233557	1.17573	0.229912	1.01585	0.3097	0.973655		1194.07	-0.268185	0.830364	0.230377	-1.16412	0.244377
F40E3.2	sup-46	1182.74	1031.16	1547.89	767.319	728.532	688.008	803.111	887.846	177.111	136.814	223.806	143.445	115.83	181.082	210.884	154.935	449.062		554.681	-0.784623	0.580504	0.30213	-2.59697	0.0094049	0.0563531		554.681	-0.568709	0.67422	0.337763	-1.68375	0.0922291	0.372102		554.681	-0.286819	0.819707	0.313558	-0.914724	0.360336	0.973655		554.681	0.601754	1.51756	0.310392	1.93869	0.0525389
F08B6.3	rsa-1	1062.23	974.376	1150.21	710.115	671.268	896.606	753.298	798.186	782.653	617.229	777.239	626.027	705.669	756.501	926.701	712.88	1149.31		827.676	-0.483839	0.715072	0.186399	-2.59571	0.00943948	0.0563531		827.676	-0.45361	0.730213	0.208691	-2.1736	0.0297352	0.24213		827.676	-0.0598651	0.959354	0.187419	-0.319419	0.749409	0.978209		827.676	0.35744	1.28115	0.186822	1.91326	0.0557143
C35D10.1	C25A11.2	2042.34	2120.11	2293.43	1570.14	1437.98	1717.27	1561.49	1602.93	2607.19	2439.67	2748.92	2217.22	2228.38	2923.05	3086.03	2550.61	4038.85		2305.04	-0.450037	0.732024	0.173425	-2.595	0.00945906	0.0563531		2305.04	-0.443768	0.735212	0.19407	-2.28664	0.0222166	0.215953		2305.04	-0.081207	0.945267	0.1728	-0.469948	0.638392	0.973655		2305.04	0.311737	1.2412	0.172627	1.80585	0.0709423
C25D7.8	ajm-1	2488.14	2400.96	2861.56	1704.28	1769.9	1515.08	1749.56	2006.4	1252.64	980.674	1350.13	1014.56	882.977	1179.33	1436.58	1003.94	2385.36		1646	-0.635585	0.64368	0.244892	-2.59537	0.0094489	0.0563531		1646	-0.460236	0.726867	0.273799	-1.68093	0.0927771	0.37303		1646	-0.219741	0.85872	0.246041	-0.893105	0.371801	0.973655		1646	0.429671	1.34693	0.245591	1.74954	0.0801981
Y47D3B.6	cht-3	403.136	352.844	466.461	639.104	826.094	604.752	537.779	520.461	337.402	527.412	542.486	508.232	577.366	534.054	185.142	538.242	272.871		492.579	0.759505	1.69291	0.292668	2.59511	0.00945606	0.0563531		492.579	0.376836	1.29849	0.327819	1.14952	0.25034	0.575008		492.579	0.203507	1.15149	0.292746	0.695166	0.486951	0.973655		492.579	-0.496645	0.708753	0.294039	-1.68904	0.0912109
C44B7.10	kqt-1	1851.44	1872.71	2508.72	1507.02	1682.94	1322.95	1723.13	1747.26	1151.72	1125.84	1114.16	839.77	827.736	942.179	1006.9	1109.62	1564.94		1405.83	-0.466169	0.723884	0.179624	-2.59525	0.00945213	0.0563531		1405.83	-0.259937	0.835124	0.20077	-1.2947	0.195424	0.518198		1405.83	-0.378214	0.769389	0.181288	-2.08627	0.0369546	0.973655		1405.83	0.118442	1.08556	0.180712	0.655415	0.512201
T13H5.4	cpr-6	5380.47	4755.28	5023.43	3636.38	3760.37	3699.87	4116.2	4160.41	2644.79	1870.49	2079.94	1750.79	1916.53	1872.41	3153.36	1934.45	2433.25		3187.55	-0.450063	0.732011	0.173525	-2.59366	0.00949616	0.0565056		3187.55	-0.288106	0.818977	0.194003	-1.48506	0.137528	0.445607		3187.55	-0.251777	0.839861	0.174563	-1.44232	0.149211	0.973655		3187.55	0.1891	1.14005	0.17431	1.08485	0.277989
Y39B6A.39	nhr-120	997.174	1003.78	1025.62	725.895	848.364	772.179	864.107	883.472	116.755	101.305	90.0089	91.1967	101.574	125.93	120.788	111.947	96.6794		475.104	-0.367543	0.775101	0.141778	-2.59238	0.00953156	0.0566477		475.104	-0.207442	0.866072	0.158468	-1.30905	0.190518	0.512434		475.104	0.044038	1.031	0.178301	0.246987	0.804918	0.988		475.104	0.0894312	1.06395	0.177941	0.502588	0.615254
C56C10.9	C25D7.15	527.916	439.027	595.037	308.703	276.779	354.068	327.344	350.983	305.739	327.936	447.612	299.239	296.702	367.68	397.016	363.605	898.124		404.912	-0.732892	0.601697	0.28317	-2.58817	0.00964874	0.0572749		404.912	-0.618485	0.651354	0.316851	-1.95197	0.0509413	0.292248		404.912	-0.165072	0.891884	0.284088	-0.581058	0.561201	0.973655		404.912	0.618816	1.53561	0.28264	2.18942	0.0285666
T28D9.10	sdc-3	6178.21	5751.96	7040.77	3918.45	3990.49	4063.09	4219.89	4726.79	2471.64	1768.14	2567.69	1729.89	1672.4	2647.29	3089	2236.26	5083.35		3715.02	-0.664126	0.631071	0.256749	-2.58667	0.00969077	0.057455		3715.02	-0.499424	0.707389	0.287059	-1.73979	0.0818951	0.355361		3715.02	-0.170206	0.888716	0.257456	-0.661107	0.508544	0.973655		3715.02	0.612686	1.5291	0.257203	2.38211	0.0172136
C25B8.3	C25D7.5	619.634	630.658	581.083	910.328	779.434	734.668	851.908	764.291	1115.11	1424.54	1210.26	1583.59	1138.69	1331	1004.92	944.835	1046.31		980.661	0.404656	1.32377	0.156527	2.58522	0.00973156	0.0575579		980.661	0.404923	1.32402	0.175024	2.31353	0.0206935	0.212758		980.661	0.112047	1.08076	0.153496	0.729967	0.46541	0.973655		980.661	-0.323802	0.798962	0.15406	-2.1018	0.0355712
T08H4.3	mcm-3	568.443	603.282	489.386	815.646	672.328	724.604	702.468	660.417	1024.08	1173.88	1244.31	1370.8	1125.33	1107.63	1046.5	1054.1	809.577		893.693	0.413927	1.33231	0.160096	2.5855	0.00972391	0.0575579		893.693	0.299773	1.23095	0.179353	1.67141	0.09464	0.37587		893.693	0.0664828	1.04716	0.156855	0.423849	0.671676	0.974801		893.693	-0.241949	0.845602	0.15728	-1.53833	0.123968
Y48G8AL.14	rap-2	3212.29	3124.9	3645.97	2267.44	2218.47	2239.68	2351.39	2511.55	742.086	616.185	790.619	660.226	653.1	967.916	916.8	735.269	1440.25		1711.42	-0.569845	0.673689	0.220465	-2.58475	0.00974502	0.0575682		1711.42	-0.45274	0.730654	0.24652	-1.83653	0.0662796	0.327038		1711.42	0.086523	1.06181	0.223548	0.387044	0.698724	0.974801		1711.42	0.525488	1.43942	0.22307	2.35571	0.0184875
K03C7.2	otub-1	525.783	482.626	410.645	658.829	705.202	806.03	562.178	443.923	936.017	1291.9	1286.88	1366.05	1566.37	1268.49	831.655	1471.43	740.004		903.178	0.613174	1.52962	0.237269	2.5843	0.00975774	0.0575742		903.178	0.0893262	1.06387	0.266446	0.335251	0.737436	0.906371		903.178	0.257586	1.19548	0.234399	1.09892	0.271803	0.973655		903.178	-0.207387	0.866104	0.234782	-0.883315	0.377066
Y48G1A.3	C25E10.12	1163.55	1085.91	1158.18	955.697	949.107	918.564	906.804	960.011	549.143	576.498	549.784	507.282	576.475	555.196	491.072	553.467	522.249		763.47	-0.271453	0.828485	0.105111	-2.58255	0.00980743	0.057798		763.47	-0.283388	0.821659	0.117985	-2.40189	0.0163107	0.203503		763.47	-0.0315357	0.978378	0.110479	-0.285444	0.775304	0.980517		763.47	-0.0962906	0.935435	0.110778	-0.869221	0.384726
F21H12.1	cyp-33B1	2108.46	1905.15	2343.27	1454.75	1558.87	1440.97	1642.82	1714.46	1266.49	867.881	1099.57	841.67	792.096	1043.29	1519.75	979.762	1650.78		1425.3	-0.51311	0.70071	0.198983	-2.57866	0.00991852	0.0583129		1425.3	-0.336106	0.792176	0.222456	-1.51089	0.130816	0.435545		1425.3	-0.272769	0.827729	0.200524	-1.36028	0.17374	0.973655		1425.3	0.359691	1.28315	0.199902	1.79934	0.0719649
M02F4.8	C25E10.7	417	427.874	406.658	565.133	536.59	548.027	466.618	395.813	1285.29	1597.9	1665.17	1688.09	1402.43	1706.03	1139.57	1372.03	1458.32		1004.62	0.398659	1.31828	0.154585	2.57889	0.00991171	0.0583129		1004.62	0.0483754	1.0341	0.17445	0.277303	0.781548	0.925305		1004.62	0.0770578	1.05486	0.147787	0.521411	0.602081	0.973655		1004.62	-0.19545	0.873301	0.148085	-1.31985	0.186884
R12H7.5	C25F6.1	990.775	958.154	1000.7	788.031	686.114	778.583	728.9	793.813	725.265	621.407	728.586	614.628	666.465	688.48	1008.88	689.595	918.002		787.434	-0.388508	0.763919	0.15072	-2.57768	0.00994672	0.0584088		787.434	-0.369111	0.774259	0.168871	-2.18576	0.028833	0.239759		787.434	-0.0750371	0.949318	0.152116	-0.493289	0.621809	0.973655		787.434	0.334083	1.26058	0.15135	2.20735	0.0272898
Y71H2AM.20	dlg-1	2456.14	2345.2	2620.36	1836.44	1924.72	1659.64	2013.88	2175.88	1103.23	898.168	1066.73	865.419	801.897	1035.94	1136.59	978.867	1581.2		1558.84	-0.453382	0.730329	0.175951	-2.57675	0.00997327	0.0584948		1558.84	-0.239978	0.846758	0.196664	-1.22024	0.222374	0.544097		1558.84	-0.182645	0.881086	0.178144	-1.02527	0.305236	0.973655		1558.84	0.269015	1.20498	0.177624	1.51452	0.129893
F43G9.2	dpyd-1	1046.23	869.943	1098.38	681.513	678.691	724.604	743.132	701.967	603.563	626.629	671.418	568.079	571.129	694.914	543.546	665.414	1063.47		738.39	-0.531914	0.691637	0.20653	-2.57548	0.01001	0.0586067		738.39	-0.475734	0.719101	0.231147	-2.05815	0.0395759	0.265646		738.39	-0.0518126	0.964724	0.207823	-0.249311	0.803121	0.988		738.39	0.257811	1.19566	0.207359	1.24331	0.213754
ZK1128.2	ddr-1	1062.23	970.321	1175.12	795.921	731.714	681.603	801.078	855.044	216.689	158.746	249.349	174.794	182.654	178.325	281.179	154.039	282.81		526.566	-0.538109	0.688673	0.208953	-2.57527	0.0100162	0.0586067		526.566	-0.368855	0.774397	0.23361	-1.57894	0.11435	0.407984		526.566	-0.219604	0.858801	0.221922	-0.989556	0.322391	0.973655		526.566	0.201662	1.15002	0.219936	0.916912	0.359189
T26A5.6	C25F6.7	1514.43	1536.09	1676.47	1268.34	1211.04	1241.52	1233.13	1343.8	807.389	748.821	662.904	669.726	702.996	668.258	1033.63	762.137	833.069		1053.75	-0.345285	0.787152	0.134115	-2.57454	0.0100373	0.0586601		1053.75	-0.290521	0.817607	0.150109	-1.9354	0.0529414	0.298638		1053.75	-0.121728	0.919086	0.137608	-0.884601	0.376372	0.973655		1053.75	0.242677	1.18319	0.136872	1.77302	0.0762262
F11A10.2	C25F6.8	3206.95	2975.85	3403.77	2111.61	1973.51	2317.45	2126.72	2223.99	1748.35	1329.5	1766.12	1265.35	1196.61	1820.93	2146.46	1483.97	2968.15		2121.49	-0.582299	0.667899	0.226365	-2.57239	0.0100999	0.0589558		2121.49	-0.554823	0.680741	0.253178	-2.19143	0.0284206	0.239759		2121.49	-0.177521	0.884221	0.227179	-0.781418	0.434556	0.973655		2121.49	0.446055	1.36231	0.22684	1.96639	0.0492538
F09G2.8	C25G4.2	3307.21	2814.64	3180.51	2264.48	2400.87	1967.04	2659.42	2794.75	7802.78	5546.71	6377.26	5568.7	5314.79	5103.39	8797.72	5313.46	5787.21		4529.47	-0.488168	0.71293	0.189823	-2.57169	0.0101203	0.0590049		4529.47	-0.185277	0.87948	0.21213	-0.873411	0.382439	0.698288		4529.47	-0.303313	0.810389	0.189018	-1.60468	0.108564	0.973655		4529.47	0.012371	1.00861	0.188958	0.0654693	0.9478
R05D11.3	C25G4.3	3670.88	3413.87	3946.98	2283.22	2283.16	2153.68	2346.3	2630.74	2053.1	1864.22	2671.08	1596.89	1593.99	2516.77	2751.39	2280.14	5708.6		2692.06	-0.715132	0.609149	0.278227	-2.57032	0.0101604	0.0590667		2692.06	-0.563362	0.676723	0.311084	-1.81096	0.0701464	0.334039		2692.06	-0.20687	0.866415	0.278547	-0.742673	0.457679	0.973655		2692.06	0.705213	1.63039	0.278268	2.53429	0.0112676
F31A3.5	dpy-26	774.276	850.678	700.688	1067.15	1256.64	929.542	1198.57	1269.44	1507.92	1337.85	1312.43	1481	1328.48	1201.39	1701.92	1226.94	1019.2		1186.12	0.483939	1.39856	0.188263	2.57055	0.0101537	0.0590667		1186.12	0.670669	1.59181	0.210177	3.19098	0.00141792	0.0983518		1186.12	-0.0522871	0.964406	0.18685	-0.279835	0.779604	0.982086		1186.12	-0.0753819	0.949091	0.186884	-0.403362	0.686682
K02D10.5	tsp-9	2110.6	1974.1	2215.69	1564.23	1685.06	1648.66	1655.02	1759.29	972.627	873.103	895.224	835.02	776.058	990.896	874.228	799.751	1089.68		1336.42	-0.363309	0.777379	0.14136	-2.5701	0.0101669	0.0590667		1336.42	-0.298964	0.812836	0.158153	-1.89034	0.0587119	0.311845		1336.42	-0.0753852	0.949089	0.144161	-0.522924	0.601027	0.973655		1336.42	0.0117712	1.00819	0.144036	0.0817241	0.934866
F33H2.6	C25G6.3	998.241	939.903	1108.34	710.115	659.603	765.775	752.281	770.851	946.901	805.218	901.306	751.423	715.47	926.552	1074.22	817.663	1534.22		892.829	-0.512365	0.701072	0.199467	-2.56867	0.0102089	0.0592403		892.829	-0.415215	0.749908	0.223154	-1.86066	0.0627922	0.321149		892.829	-0.148803	0.901999	0.199434	-0.746123	0.455593	0.973655		892.829	0.368744	1.29123	0.198844	1.85444	0.063676
C54H2.1	npr-11	683.624	598.212	706.669	519.765	545.074	485.814	565.228	626.522	489.776	422.974	459.775	430.334	470.446	504.64	601.96	480.925	496.95		534.629	-0.359325	0.779529	0.140065	-2.56542	0.0103052	0.0596698		534.629	-0.153953	0.898785	0.156336	-0.984755	0.324744	0.65031		534.629	0.0341337	1.02394	0.142206	0.240029	0.810307	0.988417		534.629	0.20188	1.1502	0.141724	1.42446	0.154314
C33A12.1	C25H3.11	2386.82	2313.76	2768.87	1629.32	1538.72	1892.02	1658.07	1751.64	901.387	922.188	1033.89	850.219	791.205	1213.34	881.158	1007.53	1631.8		1480.7	-0.561745	0.677482	0.218974	-2.56535	0.0103072	0.0596698		1480.7	-0.546441	0.684707	0.244953	-2.2308	0.0256946	0.229761		1480.7	-0.00113008	0.999217	0.220721	-0.00511995	0.995915	1		1480.7	0.301533	1.23245	0.220446	1.36783	0.171364
Y32H12A.4	eif-2D	1688.26	1398.19	2037.28	1262.43	1225.89	1214.08	1443.57	1461.88	1395.12	1547.77	1581.24	1442.05	1490.64	1603.08	1677.17	1634.43	2566.97		1568.83	-0.468797	0.722567	0.182847	-2.56387	0.0103511	0.0598538		1568.83	-0.233528	0.850552	0.204326	-1.14292	0.253073	0.576986		1568.83	0.00388399	1.0027	0.182707	0.0212579	0.98304	1		1568.83	0.378104	1.29963	0.182453	2.07234	0.0382336
Y48G1A.2	C25H3.7	1159.28	845.609	1479.12	655.87	699.9	525.155	744.149	876.912	537.27	668.404	833.191	469.283	408.967	679.288	846.506	747.808	2337.47		853.776	-0.889508	0.539798	0.347106	-2.56264	0.010388	0.0599321		853.776	-0.518936	0.697886	0.387865	-1.33793	0.180919	0.501186		853.776	-0.388122	0.764124	0.348013	-1.11525	0.264743	0.973655		853.776	0.947943	1.92912	0.346952	2.7322	0.00629129
R102.5	C25H3.9	4219.06	3793.07	4053.63	3120.56	3258.78	2917.63	3145.35	3390.65	3729.23	3287.71	3796.19	3002.84	3269.07	3374.38	3964.22	3461.41	5130.33		3583.18	-0.376148	0.770492	0.146783	-2.5626	0.010389	0.0599321		3583.18	-0.299498	0.812535	0.164156	-1.82447	0.0680807	0.329817		3583.18	-0.164652	0.892144	0.146814	-1.1215	0.262075	0.973655		3583.18	0.215674	1.16125	0.146663	1.47054	0.141414
C42C1.12	nhr-31	196.235	209.881	198.346	107.504	126.194	150.044	147.406	158.544	241.425	228.719	271.243	184.293	178.199	272.083	307.91	302.705	574.655		226.788	-0.654527	0.635284	0.255545	-2.5613	0.0104281	0.0600736		226.788	-0.397727	0.759053	0.285024	-1.39541	0.162891	0.478976		226.788	-0.223688	0.856374	0.249965	-0.894875	0.370854	0.973655		226.788	0.678177	1.60012	0.247178	2.74368	0.0060755
Y54G11A.11	nhr-258	4648.86	4516	4737.37	3295.13	3178.18	3325.68	3242.94	3732.89	1385.23	1168.66	1589.75	1211.21	1063.85	1341.11	1727.66	1210.82	2289.58		2568.53	-0.504595	0.704858	0.197033	-2.56097	0.010438	0.0600736		2568.53	-0.409957	0.752646	0.220322	-1.86072	0.0627836	0.321149		2568.53	-0.196172	0.872864	0.198828	-0.986643	0.323817	0.973655		2568.53	0.335677	1.26197	0.198426	1.6917	0.0907035
F46F11.8	elpc-4	1781.05	1613.15	2071.17	1053.34	1046.67	979.862	1149.77	1298.97	494.724	464.75	676.283	384.736	376.891	556.115	694.036	518.54	1761.01		995.356	-0.827491	0.563509	0.323239	-2.55999	0.0104674	0.0601442		995.356	-0.573366	0.672047	0.361344	-1.58676	0.112568	0.405893		995.356	-0.311358	0.805883	0.325972	-0.955167	0.339493	0.973655		995.356	0.862922	1.81872	0.324739	2.65728	0.00787742
E01A2.1	C26B2.7	1541.09	1495.53	1743.25	1166.76	1096.51	1102.46	1122.32	1309.9	66.293	43.864	64.4659	50.3482	52.5688	72.6167	63.3642	63.586	111.136		656.827	-0.506082	0.704132	0.197708	-2.55975	0.0104748	0.0601442		656.827	-0.389893	0.763186	0.221108	-1.76336	0.0778392	0.348808		656.827	0.00952979	1.00663	0.248645	0.0383269	0.969427	1		656.827	0.451427	1.36739	0.242958	1.85805	0.063162
R05G6.4	C26B2.8	1498.43	1186.29	1566.83	913.287	911.991	1008.22	1033.88	1044.2	815.305	649.605	779.672	579.479	613.006	662.742	1010.86	689.595	1562.23		972.095	-0.585291	0.666515	0.22874	-2.55876	0.0105047	0.0601755		972.095	-0.447769	0.733176	0.255788	-1.75055	0.0800242	0.351308		972.095	-0.274779	0.826577	0.230503	-1.19209	0.233228	0.973655		972.095	0.539687	1.45366	0.229548	2.35108	0.0187189
ZK180.4	C26B9.3	5001.87	4988.48	5501.85	4219.27	4272.57	4190.26	4133.48	4238.04	2540.9	2458.47	2762.3	2640.9	2502.81	3064.61	2637.53	2594.49	2967.24		3571.48	-0.288795	0.818586	0.112851	-2.55907	0.0104953	0.0601755		3571.48	-0.303064	0.810529	0.126272	-2.40009	0.0163912	0.203503		3571.48	0.0809432	1.05771	0.113839	0.711031	0.477065	0.973655		3571.48	0.0794255	1.0566	0.113851	0.697626	0.485411
T28D9.7	C26B9.5	87.4527	71.9883	103.658	134.133	141.04	139.98	106.743	92.9395	325.528	402.087	338.142	391.386	527.47	335.508	275.238	444.207	234.922		244.26	0.657632	1.57749	0.257166	2.55723	0.010551	0.0603706		244.26	0.187484	1.13878	0.292309	0.64139	0.521269	0.798204		244.26	0.235225	1.17709	0.238155	0.987699	0.3233	0.973655		244.26	-0.158837	0.895747	0.239203	-0.664026	0.506673
F29B9.11	pbrm-1	5339.95	5044.25	5436.07	3594.96	3616.15	3799.6	3420.85	4034.67	2291.56	1890.33	2740.41	2164.02	2066.22	3283.38	2430.61	2532.69	3593.4		3369.36	-0.522851	0.695995	0.204508	-2.55663	0.0105691	0.0604037		3369.36	-0.500471	0.706876	0.228707	-2.18826	0.0286503	0.239759		3369.36	0.118476	1.08559	0.20514	0.577538	0.563576	0.973655		3369.36	0.306094	1.23636	0.20507	1.49263	0.135533
Y48C3A.4	goa-1	782.808	935.848	494.369	1052.35	1206.8	946.011	963.733	1040.92	803.431	816.706	822.244	911.967	758.238	720.652	796.012	687.804	564.716		841.448	0.534303	1.44824	0.20914	2.55476	0.0106262	0.0606323		841.448	0.442412	1.35887	0.233939	1.89115	0.058605	0.311845		841.448	-0.0308265	0.978859	0.209422	-0.147198	0.882976	0.993187		841.448	-0.253969	0.838586	0.209765	-1.21073	0.225999
Y39B6A.37	nas-36	877.727	751.314	1012.66	628.255	658.542	505.027	750.248	781.785	171.174	165.012	187.316	129.195	122.067	168.213	169.301	161.204	296.363		443.259	-0.560512	0.678062	0.219421	-2.55451	0.0106338	0.0606323		443.259	-0.201143	0.869861	0.244907	-0.821304	0.411473	0.719546		443.259	-0.318776	0.80175	0.234649	-1.35852	0.174298	0.973655		443.259	0.261794	1.19897	0.231473	1.131	0.258057
K01C8.3	dcp-66	789.207	697.577	887.074	533.573	551.436	457.452	641.472	675.725	711.413	771.798	566.813	436.984	475.792	522.105	436.619	503.315	968.601		625.115	-0.622318	0.649626	0.243963	-2.55087	0.0107455	0.0611982		625.115	-0.264882	0.832267	0.27235	-0.972579	0.330763	0.654816		625.115	-0.515168	0.699712	0.244378	-2.10808	0.035024	0.973655		625.115	-0.103242	0.930938	0.24372	-0.42361	0.67185
F54C9.9	C26C6.9	2429.48	2011.62	2482.81	1432.07	1636.28	1633.1	1807.51	1916.74	1209.1	1002.61	840.489	1106.71	1171.66	723.409	1054.42	1019.17	638.807		1418.59	-0.558474	0.67902	0.219065	-2.54935	0.0107924	0.0612693		1418.59	-0.30969	0.806815	0.244853	-1.2648	0.205944	0.526229		1418.59	-0.0245507	0.983127	0.2205	-0.111341	0.911346	0.994499		1418.59	-0.171026	0.888211	0.220672	-0.775025	0.438325
F25H2.6	hel-1	1970.89	1836.21	1949.57	1604.66	1636.28	1418.1	1664.17	1830.36	2022.43	1943.59	1929.11	1858.13	1843.47	2032.35	2234.58	1809.96	2212.78		1870.39	-0.305474	0.809176	0.119801	-2.54984	0.0107773	0.0612693		1870.39	-0.135289	0.910487	0.133884	-1.0105	0.312257	0.636982		1870.39	-0.0401109	0.97258	0.119402	-0.335933	0.736922	0.975883		1870.39	0.0857452	1.06124	0.119298	0.718747	0.472297
T12E12.1	C26D10.3	2056.21	1995.39	2213.7	1658.91	1721.12	1685.25	1742.45	1726.49	220.647	253.785	245.7	237.491	252.152	253.699	223.755	270.465	202.394		997.623	-0.306824	0.808419	0.120359	-2.54925	0.0107954	0.0612693		997.623	-0.267954	0.830496	0.134716	-1.98903	0.0466984	0.281494		997.623	0.0472084	1.03326	0.139432	0.338577	0.734929	0.975883		997.623	-0.0460491	0.968585	0.140146	-0.328579	0.742474
F59G1.8	C26D10.4	1028.1	824.316	1066.48	567.106	627.789	623.964	692.302	716.181	86.0819	91.9055	107.038	64.5977	65.0427	83.6471	113.858	113.738	281.003		420.774	-0.682387	0.623133	0.267788	-2.54824	0.0108269	0.0613776		420.774	-0.466333	0.723802	0.299336	-1.55789	0.119259	0.415555		420.774	-0.416056	0.749471	0.294514	-1.41269	0.157747	0.973655		420.774	0.838935	1.78873	0.28559	2.93754	0.00330823
F44F4.2	C26D10.6	1602.94	1474.24	2106.05	953.724	1092.27	785.902	1289.04	1442.2	109.829	159.79	176.369	97.8465	109.593	115.819	179.202	154.935	548.452		729.307	-0.872253	0.546293	0.342475	-2.54691	0.0108682	0.0614585		729.307	-0.339383	0.79038	0.38263	-0.886973	0.375093	0.6904		729.307	-0.462509	0.725723	0.356558	-1.29715	0.194579	0.973655		729.307	0.98695	1.98199	0.351286	2.80953	0.00496132
2RSSE.1	ceh-79	2002.88	2217.44	1736.27	2921.33	3022.3	2447.37	2837.32	2902.99	5114.45	6178.56	5295.93	6992.7	5974.13	5210.94	4948.35	5198.83	3126.27		4007.53	0.494283	1.40862	0.194098	2.54657	0.0108787	0.0614585		4007.53	0.53162	1.44555	0.216977	2.45012	0.0142811	0.193446		4007.53	0.131928	1.09576	0.193163	0.682986	0.494616	0.973655		4007.53	-0.321725	0.800113	0.193267	-1.66466	0.09598
F59B2.3	C26E6.12	1745.85	1753.07	1930.63	1401.49	1469.79	1212.25	1451.7	1691.5	425.462	299.737	409.906	284.04	311.849	337.346	444.539	334.946	396.657		935.339	-0.411317	0.751937	0.161505	-2.54677	0.0108725	0.0614585		935.339	-0.203823	0.868247	0.180489	-1.12928	0.258779	0.582527		935.339	-0.281878	0.822519	0.17095	-1.64889	0.0991702	0.973655		935.339	0.0509124	1.03592	0.16976	0.299909	0.764247
F20C5.3	flh-2	710.287	628.63	1045.55	428.042	470.842	324.791	544.896	506.247	183.048	166.057	306.517	150.095	165.725	199.466	255.437	216.73	814.998		418.668	-0.962809	0.513057	0.378175	-2.54593	0.0108985	0.0614998		418.668	-0.596774	0.661231	0.422536	-1.41236	0.157843	0.47176		418.668	-0.345796	0.786874	0.384187	-0.900072	0.368082	0.973655		418.668	0.975216	1.96594	0.381296	2.55763	0.0105387
T19B4.4	ntl-9	374.34	353.858	439.55	249.527	234.36	325.706	289.73	298.5	248.351	218.276	267.594	177.644	188	231.638	272.268	276.734	429.184		286.78	-0.527242	0.69388	0.207178	-2.54488	0.0109316	0.0616157		286.78	-0.404576	0.755458	0.231864	-1.74489	0.0810047	0.353862		286.78	-0.296756	0.814081	0.211744	-1.40148	0.16107	0.973655		286.78	0.415438	1.3337	0.208823	1.98942	0.0466545
F10B5.5	rpb-2	2051.94	1783.48	2439.95	1242.7	1371.17	1260.74	1427.3	1538.42	866.756	583.809	874.546	542.43	584.494	752.824	1133.62	679.744	1829.68		1233.15	-0.695712	0.617405	0.273461	-2.5441	0.010956	0.0616376		1233.15	-0.496397	0.708875	0.305726	-1.62367	0.104447	0.392194		1233.15	-0.306553	0.808571	0.275497	-1.11273	0.265826	0.973655		1233.15	0.648039	1.56704	0.274611	2.35984	0.0182827
K11D9.1	fsn-1	639.898	600.24	500.349	861.015	879.117	620.305	790.912	724.928	877.64	825.061	880.628	798.921	868.721	794.188	895.019	733.478	1039.08		784.088	0.439172	1.35583	0.172634	2.54395	0.0109606	0.0616376		784.088	0.386034	1.3068	0.193148	1.99864	0.0456468	0.279426		784.088	-0.0693574	0.953062	0.171334	-0.404809	0.685618	0.974801		784.088	0.0463208	1.03263	0.17118	0.270596	0.786702
Y39B6A.35	mrps-18C	1576.28	1394.14	1741.26	1121.39	1255.58	1007.31	1236.18	1309.9	542.217	451.173	527.89	452.184	461.536	588.287	592.059	469.283	782.471		912.302	-0.477681	0.718131	0.187804	-2.5435	0.0109747	0.0616463		912.302	-0.303069	0.810526	0.209948	-1.44354	0.148868	0.46183		912.302	-0.0182547	0.987427	0.192267	-0.0949447	0.924359	0.994499		912.302	0.277556	1.21214	0.191679	1.44802	0.147611
C45B11.1	ula-1	3316.8	3115.77	3451.61	2306.89	2556.76	2282.69	2696.01	2796.93	1654.36	1233.41	1522.85	1232.11	1217.99	1229.89	2207.85	1217.99	1747.46		2105.14	-0.467993	0.72297	0.184303	-2.53926	0.0111087	0.0623278		2105.14	-0.262598	0.833585	0.206024	-1.2746	0.20245	0.524242		2105.14	-0.261298	0.834337	0.18573	-1.40687	0.159465	0.973655		2105.14	0.229788	1.17266	0.185335	1.23985	0.215031
F59E12.10	set-2	655.895	567.795	741.554	415.22	476.144	484.899	474.75	523.742	702.508	501.303	587.491	575.679	452.626	671.015	772.251	532.869	797.831		584.328	-0.513962	0.700297	0.202467	-2.5385	0.0111329	0.0623925		584.328	-0.392161	0.761987	0.226502	-1.73138	0.0833835	0.357002		584.328	-0.076571	0.948309	0.201988	-0.379088	0.704623	0.974801		584.328	0.230812	1.1735	0.201475	1.14561	0.251957
T03F1.12	rps-30	527.916	476.542	647.863	342.236	365.857	346.749	337.51	378.319	264.182	238.119	271.243	230.842	187.109	301.497	328.702	265.987	599.954		359.449	-0.64768	0.638306	0.255509	-2.53486	0.0112491	0.062972		359.449	-0.622128	0.649712	0.28621	-2.17368	0.0297294	0.24213		359.449	-0.104517	0.930116	0.26004	-0.401926	0.687739	0.974801		359.449	0.627628	1.54502	0.258028	2.43241	0.0149989
T05H4.14	frpr-3	4962.41	4729.93	5263.64	3527.89	3901.41	3143.61	4079.6	4467.66	2197.56	1615.66	2128.59	1567.44	1569.04	1787.84	2708.82	1622.79	2884.12		3068.12	-0.500429	0.706896	0.197469	-2.53421	0.01127	0.0630055		3068.12	-0.222251	0.857227	0.220728	-1.0069	0.313983	0.638633		3068.12	-0.270916	0.828793	0.198558	-1.36441	0.172437	0.973655		3068.12	0.280204	1.21437	0.198254	1.41336	0.157551
Y71H2AM.11	hint-3	1935.69	1775.37	1820.99	1442.91	1550.38	1358.63	1549.29	1613.87	1168.54	1109.13	1166.47	1063.01	1053.16	1328.24	1121.74	1157.98	1438.44		1391.4	-0.346341	0.786576	0.136684	-2.53388	0.0112807	0.0630055		1391.4	-0.221485	0.857682	0.152842	-1.44911	0.147308	0.460327		1391.4	0.000166252	1.00012	0.137967	0.00120501	0.999039	1		1391.4	0.110722	1.07977	0.137838	0.803282	0.421812
B0464.8	syg-2	2113.8	1738.87	2162.86	1239.74	1237.55	1256.16	1405.95	1497.97	377.969	302.87	405.04	273.59	266.408	356.649	565.327	380.621	1080.64		980.119	-0.688167	0.620642	0.271701	-2.53281	0.0113153	0.0631267		980.119	-0.465745	0.724097	0.303737	-1.53338	0.125182	0.425131		980.119	-0.275837	0.825971	0.27772	-0.99322	0.320603	0.973655		980.119	0.900758	1.86705	0.275585	3.26853	0.00108109
T24H7.3	vha-7	1124.09	1071.71	1367.49	849.179	699.9	731.008	775.663	910.807	712.402	581.72	794.268	563.33	580.93	725.248	876.208	640.338	1544.16		855.791	-0.644125	0.639881	0.25436	-2.53234	0.0113304	0.0631393		855.791	-0.4944	0.709857	0.284429	-1.73822	0.0821718	0.355674		855.791	-0.159381	0.895409	0.255544	-0.623692	0.53283	0.973655		855.791	0.551902	1.46602	0.254776	2.16623	0.0302938
K07A12.3	wdfy-3	4257.45	4094.21	5050.34	3004.18	2832.47	2680.67	2909.5	3152.29	2371.71	2196.33	2734.33	2051.93	1924.55	3074.72	2427.64	2455.67	5207.13		3083.83	-0.654	0.635516	0.258603	-2.52897	0.0114398	0.0635327		3083.83	-0.559696	0.678445	0.289163	-1.93557	0.0529205	0.298638		3083.83	-0.0504081	0.965663	0.258951	-0.194663	0.845657	0.991268		3083.83	0.466712	1.38196	0.258797	1.80339	0.0713267
F30A10.3	pho-12	2026.34	1777.4	2428.99	1342.31	1347.84	1196.69	1490.33	1565.76	438.325	496.081	609.385	502.532	406.294	535.893	541.566	450.476	1148.41		1076.74	-0.681343	0.623585	0.269393	-2.52917	0.0114331	0.0635327		1076.74	-0.443252	0.735475	0.301145	-1.47189	0.141051	0.451476		1076.74	-0.0951046	0.936204	0.272925	-0.348464	0.727492	0.975883		1076.74	0.472354	1.38737	0.272151	1.73563	0.0826296
F53F4.11	dsh-2	4498.48	4223.99	4264.93	3232.01	3322.4	3279.93	3490.99	3683.69	2894.13	2178.58	2267.25	2283.72	2134.83	2082.9	2673.18	1977.44	1775.47		2956.7	-0.401206	0.757225	0.158614	-2.52945	0.011424	0.0635327		2956.7	-0.271173	0.828646	0.177346	-1.52906	0.126249	0.427531		2956.7	-0.17528	0.885595	0.159332	-1.1001	0.27129	0.973655		2956.7	-0.192348	0.87518	0.159353	-1.20706	0.227408
Y47G6A.24	che-11	3276.28	2833.9	3021.03	1837.42	1942.75	1996.32	2074.87	2178.07	537.27	386.421	592.356	379.036	360.854	511.994	764.33	486.299	1255.93		1437.36	-0.66059	0.63262	0.261317	-2.52792	0.011474	0.0636509		1437.36	-0.517384	0.698637	0.292184	-1.77075	0.076603	0.346138		1437.36	-0.275751	0.82602	0.265922	-1.03696	0.299753	0.973655		1437.36	0.725925	1.65396	0.264493	2.74459	0.00605862
Y62E10A.5	C27B7.6	392.471	331.552	404.665	249.527	217.393	276.301	287.697	284.286	109.829	118.015	128.932	81.697	123.848	113.981	136.629	117.321	243.054		212.776	-0.601944	0.658865	0.238193	-2.52713	0.0114999	0.0637227		212.776	-0.395582	0.760182	0.266144	-1.48635	0.137188	0.445231		212.776	-0.156326	0.897307	0.253747	-0.616071	0.537847	0.973655		212.776	0.480705	1.39543	0.24958	1.92606	0.0540972
F07A11.5	C27B7.7	441.53	405.568	504.336	331.387	364.796	298.259	361.908	365.198	30.6729	19.8432	20.6777	23.7491	23.1659	18.384	16.8311	18.8071	26.2028		192.43	-0.443617	0.735289	0.176065	-2.51963	0.0117479	0.0650235		192.43	-0.309472	0.806937	0.196951	-1.57131	0.11611	0.41245		192.43	-0.136806	0.909531	0.29651	-0.461386	0.644521	0.973655		192.43	-0.209692	0.864722	0.299552	-0.700019	0.483915
K11B4.2	rap-1	1096.36	999.724	1179.11	678.554	577.948	826.158	664.854	673.538	230.541	178.589	235.969	204.243	181.763	262.891	246.526	245.388	528.574		530.043	-0.652793	0.636048	0.25919	-2.51859	0.0117826	0.0651422		530.043	-0.706138	0.612959	0.290205	-2.43323	0.0149646	0.199668		530.043	0.00888446	1.00618	0.268303	0.0331135	0.973584	1		530.043	0.662814	1.58317	0.266328	2.48871	0.0128207
C06A5.3	C27C12.4	2641.71	2334.04	2693.12	2042.57	2113.49	1988.09	2453.05	2420.8	1937.34	1752.47	1740.58	1709.94	1728.53	1583.78	2168.24	1688.16	1676.08		2039.53	-0.319879	0.801137	0.127101	-2.51674	0.0118446	0.0654113		2039.53	-0.0689637	0.953323	0.141972	-0.485755	0.627141	0.854195		2039.53	-0.11295	0.924695	0.12782	-0.883664	0.376877	0.973655		2039.53	0.0262833	1.01839	0.127697	0.205825	0.836928
Y17G7B.9	dmd-4	1285.13	1196.42	1222.97	872.85	996.827	869.159	1114.19	1119.65	748.022	555.611	566.813	578.529	621.024	528.539	861.357	592.873	911.678		861.273	-0.435929	0.739217	0.173269	-2.51591	0.0118725	0.0654184		861.273	-0.144763	0.904528	0.193465	-0.748265	0.4543	0.748933		861.273	-0.115038	0.923358	0.17609	-0.653293	0.513568	0.973655		861.273	0.337819	1.26384	0.175264	1.92748	0.0539198
Y53G8AR.3	dpf-2	1146.48	1091.99	1194.06	852.138	883.359	886.542	845.808	900.967	1500	1565.53	1708.95	1548.44	1487.07	1994.66	1621.73	1796.53	2248.02		1368.96	-0.388594	0.763874	0.154442	-2.51612	0.0118654	0.0654184		1368.96	-0.38975	0.763262	0.173025	-2.25257	0.0242864	0.225079		1368.96	0.0755342	1.05375	0.152643	0.494844	0.620711	0.973655		1368.96	0.247521	1.18717	0.152514	1.62294	0.104602
T27E9.4	egl-45	1305.39	1303.9	1380.45	1055.31	930.019	1053.97	1065.39	1122.93	50.4618	60.5741	53.5188	74.0973	59.6968	46.8791	48.5132	52.8391	31.6241		570.327	-0.392349	0.761888	0.156147	-2.51269	0.0119816	0.0659457		570.327	-0.281616	0.822669	0.174649	-1.61246	0.106861	0.394704		570.327	0.133177	1.09671	0.217778	0.611526	0.540851	0.973655		570.327	-0.309079	0.807157	0.226655	-1.36366	0.172676
F01F1.7	C27D6.1	3126.97	2841	2874.52	2151.06	2308.61	2153.68	2434.75	2587	6743.08	6482.47	5998.97	7003.15	7062.93	5486.7	7668.06	6123.07	4764.4		4577.08	-0.419097	0.747893	0.166913	-2.51087	0.0120434	0.066212		4577.08	-0.231304	0.851865	0.186584	-1.23968	0.215095	0.534921		4577.08	0.0243726	1.01704	0.165901	0.146911	0.883202	0.993187		4577.08	-0.0512343	0.96511	0.16592	-0.308789	0.757482
F25H2.9	C27D8.4	4281.98	3908.66	4997.51	2658.99	2659.62	2544.35	2676.7	3047.32	1490.11	1445.42	2000.87	1180.81	1168.99	1841.16	1903.9	1515.32	4274.67		2564.49	-0.746115	0.596207	0.297263	-2.50995	0.0120749	0.0662688		2564.49	-0.619205	0.651029	0.332375	-1.86297	0.0624665	0.321149		2564.49	-0.23599	0.849102	0.298087	-0.79168	0.428547	0.973655		2564.49	0.640501	1.55887	0.297743	2.15119	0.0314612
EEED8.1	wdr-60	2490.27	2345.2	3144.63	1599.73	1748.69	1383.33	1830.89	2076.38	741.096	499.214	793.052	493.982	494.503	762.935	912.84	557.049	1628.19		1382.47	-0.754127	0.592905	0.300664	-2.5082	0.0121347	0.0662688		1382.47	-0.445328	0.734417	0.336082	-1.32506	0.185152	0.505444		1382.47	-0.215079	0.861499	0.303149	-0.709483	0.478025	0.973655		1382.47	0.607809	1.52394	0.302375	2.01012	0.0444188
Y38A8.2	C27F2.10	3776.46	3457.46	4516.1	2453.84	2390.26	2166.49	2400.18	2705.09	1031.99	1002.61	1357.43	917.667	757.347	1179.33	1240.55	890.204	2681.72		2054.4	-0.745086	0.596632	0.296981	-2.50887	0.0121118	0.0662688		2054.4	-0.617672	0.651722	0.332062	-1.86011	0.0628702	0.321149		2054.4	-0.248766	0.841616	0.298427	-0.833592	0.404511	0.973655		2054.4	0.504966	1.41909	0.297976	1.69465	0.0901411
Y106G6A.2	tmem-131	2857.14	2643.29	3034.99	2140.21	2015.92	2173.81	2257.86	2256.79	1682.06	1392.16	1524.07	1161.81	1162.75	1526.79	1802.91	1327.25	2105.26		1945	-0.431219	0.741635	0.171875	-2.50891	0.0121105	0.0662688		1945	-0.333892	0.793393	0.192209	-1.73713	0.0823645	0.355674		1945	-0.255822	0.83751	0.173072	-1.47813	0.139373	0.973655		1945	0.187053	1.13844	0.172703	1.08309	0.278767
F59F5.2	pdl-1	232.496	190.617	278.083	156.817	180.277	175.662	213.485	179.319	148.417	130.548	122.85	143.445	129.194	124.092	153.46	130.754	131.918		165.967	-0.452098	0.730979	0.180242	-2.50828	0.012132	0.0662688		165.967	-0.250334	0.840702	0.201065	-1.24504	0.213117	0.5326		165.967	-0.0215503	0.985173	0.189354	-0.11381	0.909388	0.994499		165.967	0.0464684	1.03273	0.188889	0.246008	0.805676
F55C5.8	mfsd-13.2	5631.1	5561.35	5876.61	4451.04	4974.59	4418.99	4999.62	5169.62	2287.6	2024.01	2354.83	2236.22	1984.25	2354.99	2447.44	1994.45	2294.1		3591.81	-0.302155	0.81104	0.120421	-2.50917	0.0121017	0.0662688		3591.81	-0.162235	0.89364	0.134631	-1.20503	0.22819	0.549888		3591.81	-0.0197206	0.986424	0.121889	-0.161791	0.871471	0.993187		3591.81	0.0149735	1.01043	0.121873	0.122861	0.902217
C54D1.6	C27H5.6	198.368	223.062	153.494	300.813	276.779	274.471	229.751	252.577	400.726	492.948	456.126	551.93	498.958	413.639	408.897	418.235	226.79		339.857	0.567912	1.48238	0.226484	2.50751	0.0121584	0.0663247		339.857	0.331659	1.25846	0.254421	1.30359	0.192374	0.514708		339.857	0.117849	1.08512	0.219427	0.537078	0.591213	0.973655		339.857	-0.357212	0.780672	0.220629	-1.61907	0.105433
F52F12.4	glc-4	856.397	718.869	1021.63	554.284	551.436	419.941	640.456	618.868	167.217	145.169	183.667	145.345	128.303	172.809	197.023	154.039	481.59		421.003	-0.767644	0.587376	0.306213	-2.50689	0.0121797	0.0663674		421.003	-0.459184	0.727397	0.342144	-1.34208	0.179571	0.500172		421.003	-0.151379	0.900389	0.31691	-0.477673	0.632883	0.973655		421.003	0.748491	1.68003	0.313792	2.38531	0.0170648
F33G12.3	unc-41	598.305	549.544	596.034	429.028	503.716	399.813	486.95	557.637	2000.66	1818.27	1991.14	1911.33	2003.85	1734.53	2447.44	1790.26	2394.4		1306.64	-0.389102	0.763605	0.155304	-2.50542	0.0122306	0.066571		1306.64	-0.154768	0.898277	0.173256	-0.893289	0.371702	0.687533		1306.64	-0.0403114	0.972445	0.148593	-0.271288	0.78617	0.982885		1306.64	0.190807	1.1414	0.148434	1.28547	0.198629
Y71F9B.4	ruvb-1	3642.09	3429.08	4053.63	2450.88	2111.36	2562.65	2367.65	2999.21	1766.16	1384.85	1792.88	1191.26	1387.28	2295.24	2492.98	1902.21	3775.92		2447.37	-0.642786	0.640475	0.25668	-2.50423	0.0122719	0.0666751		2447.37	-0.466722	0.723607	0.286979	-1.62633	0.10388	0.390989		2447.37	-0.0205139	0.985881	0.257397	-0.0796973	0.936478	0.994546		2447.37	0.72497	1.65287	0.257094	2.81986	0.0048044
F33H1.3	tofu-1	3518.37	3069.13	4230.05	2507.1	2807.02	2343.07	3034.54	3271.47	1778.04	1310.7	1576.37	1237.81	1292.84	1365.93	2209.83	1346.95	2308.56		2306.34	-0.498594	0.707796	0.199112	-2.50408	0.0122769	0.0666751		2306.34	-0.193655	0.874388	0.222532	-0.870233	0.384173	0.699212		2306.34	-0.259748	0.835234	0.200386	-1.29624	0.194894	0.973655		2306.34	0.330126	1.25712	0.199983	1.65077	0.0987859
H12C20.2	C27H6.8	805.205	712.785	856.176	539.49	573.706	517.836	658.754	665.884	360.159	248.563	294.354	227.992	241.46	241.749	366.324	251.657	526.767		475.815	-0.541839	0.686895	0.216591	-2.50167	0.0123607	0.0669824		475.815	-0.256881	0.836895	0.241863	-1.0621	0.288192	0.611844		475.815	-0.345148	0.787227	0.22347	-1.5445	0.122468	0.973655		475.815	0.341484	1.26706	0.221216	1.54367	0.122669
Y17G7B.15	C27H6.9	693.223	751.314	689.725	911.314	1030.76	783.158	1091.82	985.159	756.927	907.567	799.133	907.217	876.74	943.098	743.539	813.185	662.299		843.893	0.351858	1.2762	0.14063	2.50202	0.0123487	0.0669824		843.893	0.545873	1.4599	0.156797	3.48141	0.000498786	0.0821654		843.893	0.146514	1.10689	0.14014	1.04549	0.295798	0.973655		843.893	-0.150854	0.900717	0.140744	-1.07183	0.283796
W04B5.5	nex-3	1086.76	1109.23	1193.06	851.152	880.177	774.924	873.256	942.516	631.267	613.052	711.557	553.83	608.551	690.318	765.32	664.519	1091.48		825.94	-0.435647	0.739362	0.174198	-2.50087	0.0123888	0.0670358		825.94	-0.3155	0.803573	0.194829	-1.61937	0.105368	0.392719		825.94	-0.0775203	0.947685	0.176299	-0.439708	0.660149	0.974801		825.94	0.367093	1.28975	0.175543	2.09119	0.0365111
W05B2.2	tag-77	90.6522	90.2388	59.8027	132.16	129.375	107.959	151.473	129.022	548.154	697.647	546.135	749.523	674.484	507.398	498.993	531.078	326.18		351.193	0.618618	1.5354	0.247402	2.50045	0.0124035	0.0670358		351.193	0.807951	1.75072	0.274155	2.94706	0.00320815	0.124307		351.193	0.107824	1.0776	0.221402	0.487004	0.626255	0.973655		351.193	-0.40235	0.756625	0.222383	-1.80926	0.07041
C53B7.4	sru-7	1441.9	1396.17	1619.66	1077.01	997.888	1205.84	1081.66	1027.8	1048.81	976.496	997.396	916.717	981.878	1327.32	817.794	1189.33	1172.8		1133.91	-0.442064	0.736081	0.17681	-2.50022	0.0124115	0.0670358		1133.91	-0.494458	0.709828	0.198029	-2.49689	0.0125288	0.185587		1133.91	0.0938262	1.0672	0.177471	0.528685	0.597024	0.973655		1133.91	0.0734829	1.05225	0.177513	0.413959	0.678904
ZK546.2	cka-1	1708.53	1558.39	1871.82	1212.13	1277.85	1244.27	1256.51	1328.49	619.394	556.655	668.985	525.331	581.821	614.025	856.406	542.72	983.058		1023.91	-0.460652	0.726658	0.184319	-2.49921	0.0124472	0.0671104		1023.91	-0.406357	0.754526	0.206216	-1.97055	0.0487758	0.287206		1023.91	-0.099707	0.933222	0.187996	-0.530369	0.595856	0.973655		1023.91	0.368858	1.29133	0.187196	1.97044	0.0487877
M28.5	nhr-138	12119.7	12009.9	14089.5	8388.24	7847.36	8903.85	8093.12	8894.86	7416.9	5784.83	8586.12	5676.99	5222.13	8723.2	9016.52	6374.72	12768.9		8818.64	-0.604331	0.657776	0.241824	-2.49905	0.0124526	0.0671104		8818.64	-0.584826	0.66673	0.270392	-2.16288	0.0305502	0.244848		8818.64	-0.150984	0.900636	0.241956	-0.624013	0.532619	0.973655		8818.64	0.37018	1.29251	0.241896	1.53033	0.125936
K04G7.4	glb-9	5580.98	5410.27	5921.47	4714.38	4811.28	4448.26	4666.18	4935.64	1096.31	1037.07	1138.49	1177.96	1013.95	1212.42	1165.31	1153.5	1011.07		2970.27	-0.275452	0.826192	0.110249	-2.49844	0.0124741	0.0671527		2970.27	-0.231818	0.851561	0.123317	-1.87985	0.0601279	0.315705		2970.27	0.0574004	1.04059	0.114599	0.500879	0.616456	0.973655		2970.27	0.0255024	1.01783	0.11468	0.222378	0.82402
F41G4.2	tdo-2	2243.91	2569.27	2229.64	3343.46	3439.05	2529.71	3350.7	3469.38	3952.84	3354.55	3332.76	3618.42	3107.8	3246.61	3698.88	2928.54	2706.12		3124.8	0.402779	1.32205	0.161299	2.4971	0.0125213	0.0673328		3124.8	0.538566	1.45253	0.180255	2.98779	0.00280998	0.120684		3124.8	-0.0936018	0.93718	0.160927	-0.581642	0.560808	0.973655		3124.8	-0.189283	0.877041	0.160974	-1.17586	0.239651
ZK616.6	dnc-2	2665.17	2634.16	3132.67	2041.58	1985.17	2027.43	1966.1	2274.28	581.795	533.679	707.908	546.23	515.887	760.177	741.559	597.35	943.302		1450.26	-0.477961	0.717992	0.191473	-2.49623	0.0125522	0.0673671		1450.26	-0.406821	0.754284	0.214145	-1.89975	0.0574662	0.30908		1450.26	-2.36254e-05	0.999984	0.19585	-0.00012063	0.999904	1		1450.26	0.324697	1.2524	0.195331	1.66229	0.0964545
F40G9.11	C28H8.2	1264.86	1068.67	1495.07	933.012	1081.66	820.669	1156.89	1168.85	471.966	464.75	513.294	404.685	449.062	527.62	500.973	518.54	670.431		794.765	-0.433822	0.740298	0.173797	-2.49615	0.0125551	0.0673671		794.765	-0.134238	0.911151	0.19405	-0.691772	0.48908	0.774377		794.765	-0.0693158	0.95309	0.178503	-0.388317	0.697782	0.974801		794.765	0.221762	1.16616	0.177826	1.24708	0.21237
C23H3.3	erd-2.2	764.678	684.396	944.883	565.133	633.091	508.687	643.505	660.417	104.881	88.7724	83.9273	85.4969	89.0996	102.031	150.49	90.4534	155.41		373.844	-0.48861	0.712711	0.195847	-2.49486	0.0126008	0.0674707		373.844	-0.291734	0.81692	0.218863	-1.33295	0.182549	0.502573		373.844	-0.00795685	0.9945	0.226422	-0.0351417	0.971967	1		373.844	0.50911	1.42317	0.221883	2.2945	0.0217617
F54D5.1	C28H8.5	381.806	383.262	438.553	284.046	320.257	274.471	309.045	352.077	55.4091	42.8196	42.5718	42.7485	50.7868	39.5255	62.3741	47.4656	81.3191		188.737	-0.454795	0.729614	0.182295	-2.49483	0.0126019	0.0674707		188.737	-0.280092	0.823539	0.203704	-1.375	0.169133	0.486698		188.737	-0.0861869	0.942009	0.243675	-0.353697	0.723566	0.975508		188.737	0.435075	1.35198	0.234774	1.85316	0.0638588
E04F6.5	pxl-1	3620.76	3810.31	3848.3	3039.69	3123.04	2655.05	3070.12	3335.98	2657.66	2365.52	2601.75	2257.12	2056.42	2395.43	2904.85	2334.77	3349.44		2907.42	-0.355349	0.781681	0.142473	-2.49415	0.012626	0.0675262		2907.42	-0.231275	0.851882	0.159303	-1.45179	0.14656	0.459814		2907.42	-0.184649	0.879863	0.143029	-1.29099	0.196708	0.973655		2907.42	0.171767	1.12644	0.142819	1.20269	0.229097
F32A5.7	C28H8.8	1080.36	1049.41	1169.14	743.648	683.993	816.094	668.92	821.148	650.067	508.614	633.712	401.835	426.787	585.53	779.181	567.796	1119.49		747.396	-0.555883	0.680241	0.223136	-2.49123	0.0127303	0.0680104		747.396	-0.561883	0.677417	0.24981	-2.24925	0.0244969	0.226088		747.396	-0.341776	0.78907	0.225475	-1.5158	0.129569	0.973655		747.396	0.460717	1.37623	0.224208	2.05486	0.0398924
F32A11.2	dpff-1	931.051	892.249	1133.26	658.829	766.709	582.794	794.978	908.621	20.7784	15.6657	17.0287	15.1995	15.1469	16.5456	32.6722	17.016	50.5986		404.067	-0.558392	0.679058	0.224231	-2.49025	0.0127652	0.0680488		404.067	-0.210566	0.864198	0.250358	-0.841062	0.400313	0.711176		404.067	-0.194287	0.874005	0.362186	-0.536427	0.591663	0.973655		404.067	0.901969	1.86861	0.331123	2.72397	0.00645022
C56A3.8	C29A12.1	201.568	200.756	275.092	166.68	174.975	145.47	188.07	193.533	367.085	413.575	384.363	344.838	308.285	393.417	239.596	278.525	349.672		272.088	-0.477963	0.717991	0.191909	-2.49057	0.0127539	0.0680488		272.088	-0.243938	0.844437	0.213843	-1.14074	0.25398	0.577834		272.088	-0.154834	0.898236	0.182276	-0.849445	0.395634	0.973655		272.088	-0.423884	0.745415	0.183364	-2.3117	0.0207941
Y39A1A.7	lig-1	2047.67	1912.25	2142.93	1611.57	1383.89	1492.21	1415.1	1607.31	1267.48	1225.06	1323.37	1067.76	1128.89	1357.66	1283.12	1406.95	2109.78		1516.65	-0.443449	0.735374	0.178192	-2.48861	0.0128245	0.0682168		1516.65	-0.42893	0.742812	0.199392	-2.15119	0.0314613	0.245876		1516.65	-0.102313	0.931538	0.179093	-0.571287	0.567805	0.973655		1516.65	0.33129	1.25814	0.178714	1.85375	0.0637753
F25H2.12	nrx-1	346.611	314.315	337.885	214.021	208.91	277.216	255.166	273.352	217.678	154.568	195.83	193.793	188	189.355	259.397	145.084	214.14		234.431	-0.511053	0.70171	0.205351	-2.48868	0.0128219	0.0682168		234.431	-0.333443	0.79364	0.229497	-1.45293	0.146243	0.459428		234.431	0.00750213	1.00521	0.210754	0.0355966	0.971604	1		234.431	0.120927	1.08743	0.210228	0.575219	0.565143
C35D10.5	C29E4.12	646.297	710.757	728.596	559.216	446.451	572.73	555.062	588.253	235.488	256.918	206.777	166.244	186.218	188.436	236.626	217.625	306.302		400.47	-0.401363	0.757143	0.161402	-2.48673	0.0128925	0.0685044		400.47	-0.28263	0.822091	0.180561	-1.56529	0.117515	0.413178		400.47	-0.371776	0.772831	0.174588	-2.12944	0.0332176	0.973655		400.47	0.119937	1.08669	0.171712	0.698482	0.484876
C24G6.6	C29E4.13	95.9847	110.517	81.7304	140.05	131.496	142.725	127.075	123.555	266.161	231.853	270.027	245.091	297.593	248.184	256.427	284.794	173.481		189.808	0.524403	1.43834	0.210927	2.48618	0.0129122	0.0685351		189.808	0.383861	1.30483	0.237332	1.6174	0.105792	0.392887		189.808	0.0431354	1.03035	0.193608	0.222798	0.823693	0.989351		189.808	-0.103731	0.930623	0.194348	-0.533737	0.593523
F10G8.7	C29E4.15	899.057	716.841	1009.67	506.943	529.167	485.814	628.257	603.56	229.552	163.968	245.7	172.894	181.763	221.527	272.268	186.28	645.132		452.847	-0.786823	0.579619	0.316983	-2.48223	0.0130564	0.0691512		452.847	-0.506863	0.703751	0.354245	-1.43083	0.15248	0.464624		452.847	-0.14908	0.901825	0.324293	-0.459709	0.645725	0.973655		452.847	0.788919	1.72778	0.321862	2.45111	0.0142417
T22B2.4	kle-2	1422.71	1360.68	1463.17	1870.96	1865.34	1672.44	1887.82	1652.14	2081.8	2313.3	2221.03	2523.11	2454.7	2447.83	1958.35	2248.8	1545.97		1940.6	0.348845	1.27354	0.14052	2.48253	0.0130455	0.0691512		1940.6	0.322539	1.25053	0.157169	2.05218	0.040152	0.266964		1940.6	0.16658	1.12239	0.139506	1.19407	0.232449	0.973655		1940.6	-0.201587	0.869593	0.139787	-1.4421	0.149273
F39H12.4	ran-2	1687.2	1784.5	1516	2231.93	2261.95	1963.38	2245.66	2082.94	1767.15	1801.56	1687.06	2015.83	1977.12	1836.56	1983.1	1766.08	1315.56		1877.86	0.372452	1.29455	0.150178	2.48008	0.0131355	0.0694949		1877.86	0.38059	1.30187	0.167911	2.26662	0.0234137	0.222727		1877.86	0.149347	1.10907	0.150215	0.994224	0.320114	0.973655		1877.86	-0.0537858	0.963405	0.150393	-0.357635	0.720617
ZK1127.1	tag-250	2892.34	2756.85	3901.13	1751.62	1959.72	1490.38	2138.92	2527.96	1595.98	1342.03	2005.74	987.964	843.774	1490.94	1888.05	1393.52	5152.02		2124.64	-0.876636	0.544636	0.35363	-2.47896	0.0131765	0.0695123		2124.64	-0.448166	0.732974	0.395271	-1.13382	0.25687	0.58083		2124.64	-0.573149	0.672148	0.354215	-1.61808	0.105645	0.973655		2124.64	0.770714	1.70611	0.353725	2.17885	0.0293427
Y37D8A.13	let-653	2963.79	3616.65	2813.72	4386.93	5037.16	3438.21	4720.06	5011.08	5399.41	4597.37	5257.01	5124.11	4686.64	4789.94	6588.88	4391.02	6374.51		4658.62	0.453179	1.36905	0.182819	2.47884	0.0131812	0.0695123		4658.62	0.635786	1.55378	0.204323	3.11167	0.0018603	0.104274		4658.62	-0.0631315	0.957184	0.182524	-0.345882	0.729432	0.975883		4658.62	0.186096	1.13768	0.18247	1.01988	0.307788
R10E4.1	trpa-1	4461.15	4312.2	4613.78	3609.75	3551.46	3574.53	3543.85	3666.19	991.426	799.996	935.363	835.02	784.968	915.522	1099.96	835.574	917.099		2320.46	-0.318425	0.801945	0.128436	-2.47924	0.0131662	0.0695123		2320.46	-0.307832	0.807855	0.143685	-2.14241	0.0321608	0.246393		2320.46	-0.105002	0.929803	0.133142	-0.788653	0.430315	0.973655		2320.46	0.0645092	1.04573	0.132853	0.485568	0.627274
C32A3.3	cutl-27	1089.96	1065.63	1237.92	822.55	1002.13	718.2	1044.04	1084.66	590.7	707.046	665.336	748.573	669.138	526.701	562.357	663.623	679.466		816.355	-0.417062	0.748948	0.168326	-2.47771	0.0132229	0.0696576		816.355	-0.0879616	0.940851	0.187832	-0.468299	0.63957	0.862403		816.355	-0.0136352	0.990593	0.17038	-0.080028	0.936215	0.994546		816.355	-0.042331	0.971085	0.170469	-0.248321	0.803886
K06A1.5	nhr-43	2217.25	2187.02	2593.44	1696.39	1607.65	1847.19	1803.44	1890.5	1533.64	1322.19	1482.71	1196.96	1188.59	1485.43	1788.06	1347.84	2269.71		1732.82	-0.441885	0.736172	0.178387	-2.47711	0.013245	0.0696994		1732.82	-0.336832	0.791778	0.199492	-1.68845	0.0913258	0.370134		1732.82	-0.164501	0.892237	0.179255	-0.917694	0.358779	0.973655		1732.82	0.317245	1.24595	0.178874	1.77357	0.0761345
Y54E10BR.6	C29F4.3	3489.58	3343.91	3443.64	2355.22	2030.77	2327.52	2267.01	2419.71	1743.41	1339.94	1920.6	1321.4	1191.26	1946.86	2181.11	1565.47	3440.7		2254.59	-0.61425	0.65327	0.24806	-2.47621	0.0132786	0.0697421		2254.59	-0.547839	0.684044	0.277401	-1.97489	0.0482801	0.286186		2254.59	-0.166039	0.891287	0.248798	-0.667364	0.50454	0.973655		2254.59	0.522556	1.4365	0.248476	2.10305	0.0354616
K08E3.4	C29F5.1	951.315	995.669	703.679	1273.28	1527.05	918.564	1334.79	1356.92	1228.89	1436.02	1282.02	1420.2	1294.62	1017.55	1285.1	1320.98	1174.61		1207.13	0.488168	1.40266	0.19715	2.47613	0.0132815	0.0697421		1207.13	0.607265	1.52337	0.220247	2.7572	0.0058298	0.151962		1207.13	-0.0806961	0.945601	0.196454	-0.410764	0.681246	0.974801		1207.13	-0.0621114	0.957861	0.196451	-0.316168	0.751875
Y55F3AM.8	C29F5.3	404.202	395.429	467.458	257.417	257.69	308.323	296.846	329.115	429.42	288.249	406.257	246.991	277.1	432.023	467.311	291.958	549.356		359.126	-0.621395	0.650042	0.25105	-2.47518	0.0133168	0.0698526		359.126	-0.432713	0.740867	0.280629	-1.54194	0.123088	0.421227		359.126	-0.233005	0.850861	0.250711	-0.929378	0.352693	0.973655		359.126	0.219466	1.1643	0.249664	0.879046	0.379376
C44F1.5	glb-10	420.2	512.029	430.58	719.978	557.799	630.369	512.365	517.181	4677.12	3759.77	4067.43	4228.3	3837.52	3213.52	4840.43	3548.28	2902.19		2316.18	0.485707	1.40027	0.196337	2.47385	0.0133666	0.070039		2316.18	0.180255	1.13308	0.22041	0.817818	0.413461	0.720623		2316.18	-0.148808	0.901995	0.190408	-0.781521	0.434496	0.973655		2316.18	-0.147438	0.902852	0.190413	-0.774307	0.438749
C36B1.4	C29F5.8	2524.4	2339.11	3245.29	1590.86	1562.05	1446.46	1605.21	1922.21	1174.47	1139.42	1646.92	958.515	878.522	1409.13	1511.83	1286.05	4123.78		1786.13	-0.818091	0.567192	0.330818	-2.47293	0.013401	0.0701447		1786.13	-0.615967	0.652492	0.369864	-1.66539	0.0958354	0.378298		1786.13	-0.286845	0.819693	0.331497	-0.865303	0.386872	0.973655		1786.13	0.805614	1.74789	0.331028	2.43367	0.0149465
Y71F9AM.6	pat-4	7601.99	8460.14	7913.89	10944.6	11481.5	9266.15	11299.5	11963	9562.02	9014.05	11004.2	10259.6	7833.64	11328.2	10708.5	9238.78	12158.1		10002.2	0.402498	1.32179	0.162786	2.47255	0.0134153	0.0701447		10002.2	0.541357	1.45534	0.181976	2.97488	0.00293106	0.120716		10002.2	-0.00772893	0.994657	0.162748	-0.0474902	0.962123	0.99925		10002.2	0.118235	1.08541	0.162733	0.726556	0.467498
C37C3.1	C29G2.3	941.716	847.637	982.758	713.074	714.746	621.22	739.066	793.813	187.995	159.79	162.989	162.444	153.251	113.061	210.884	146.875	232.211		463.737	-0.436347	0.739003	0.176666	-2.46989	0.0135153	0.0705929		463.737	-0.269896	0.82938	0.197485	-1.36666	0.171731	0.489432		463.737	-0.254122	0.838497	0.195722	-1.29838	0.194156	0.973655		463.737	0.205838	1.15336	0.192669	1.06835	0.285363
Y42H9B.3	C29G2.6	2671.57	2217.44	2789.8	1690.47	1690.36	1540.7	1878.67	1868.63	307.718	239.163	310.166	182.393	242.351	271.164	471.271	264.195	714.705		1138.28	-0.641813	0.640907	0.260177	-2.46684	0.0136313	0.0711229		1138.28	-0.450064	0.73201	0.290877	-1.54727	0.121799	0.419034		1138.28	-0.299833	0.812347	0.269031	-1.11449	0.265068	0.973655		1138.28	0.759083	1.69241	0.266385	2.84957	0.00437781
C25A1.3	rars-2	1116.62	1029.13	1135.25	766.333	748.681	766.689	840.725	870.351	958.775	683.025	931.714	706.774	686.958	839.228	1189.07	757.659	1521.57		914.621	-0.523987	0.695447	0.21251	-2.46571	0.0136744	0.0711965		914.621	-0.354299	0.78225	0.237583	-1.49126	0.135892	0.44333		914.621	-0.204652	0.867748	0.212939	-0.961082	0.336511	0.973655		914.621	0.430563	1.34776	0.212234	2.02871	0.0424876
F55G1.9	C29H12.2	595.105	522.168	700.688	427.055	469.781	391.579	482.883	459.231	281.993	316.447	357.603	278.34	258.389	374.114	334.642	283.003	454.483		411.03	-0.497325	0.708419	0.201695	-2.46573	0.0136735	0.0711965		411.03	-0.363386	0.777338	0.225598	-1.61077	0.10723	0.394839		411.03	-0.0686219	0.953548	0.205847	-0.333364	0.738859	0.975883		411.03	0.16684	1.1226	0.205122	0.81337	0.416006
W01G7.4	rgs-3	1917.56	1727.72	1921.66	1193.39	1308.6	1085.08	1217.88	1532.96	813.326	662.138	917.118	563.33	567.565	841.986	1114.81	764.823	1814.32		1174.37	-0.634189	0.644303	0.257265	-2.46512	0.0136966	0.0712367		1174.37	-0.432141	0.741161	0.287607	-1.50254	0.132957	0.439185		1174.37	-0.277949	0.824763	0.259117	-1.07268	0.283416	0.973655		1174.37	0.626948	1.54429	0.258254	2.42764	0.0151973
Y39A1B.2	C29H12.6	285.821	262.605	228.247	356.044	365.857	342.174	351.742	322.555	666.888	935.765	774.807	1026.91	1014.84	955.048	598.989	757.659	487.011		572.528	0.454499	1.37031	0.18445	2.46407	0.0137368	0.071319		572.528	0.381887	1.30305	0.206597	1.84847	0.0645347	0.324954		572.528	0.334129	1.26062	0.175866	1.8999	0.057446	0.973655		572.528	-0.366575	0.775621	0.177029	-2.0707	0.0383864
R11A5.2	C30A5.10	2531.86	2266.11	2430.98	1903.5	2084.85	1936.85	1935.6	2032.64	526.386	497.125	487.751	509.182	470.446	471.549	568.297	458.536	458.098		1268.81	-0.287006	0.819601	0.116482	-2.46395	0.0137414	0.071319		1268.81	-0.280342	0.823396	0.130407	-2.14974	0.0315757	0.245876		1268.81	-0.0594003	0.959663	0.125438	-0.473542	0.635827	0.973655		1268.81	-0.0271741	0.981341	0.125375	-0.216742	0.828409
C04F12.5	mob-4	225.031	216.979	274.096	145.968	148.464	127.172	143.34	149.797	87.0714	137.858	148.393	102.596	94.4456	155.345	150.49	160.308	370.454		166.93	-0.76498	0.588462	0.310838	-2.46102	0.0138543	0.0714775		166.93	-0.703917	0.613903	0.348466	-2.02004	0.0433791	0.274864		166.93	-0.0807215	0.945585	0.316616	-0.25495	0.798761	0.986168		166.93	0.871236	1.82923	0.31249	2.78804	0.00530278
K07A1.11	unc-86	5714.29	4934.75	5825.78	3719.23	3878.08	3409.85	4166.01	4572.62	1089.38	892.946	1230.93	793.221	916.835	989.058	1479.16	943.939	2251.64		2753.4	-0.581849	0.668107	0.236288	-2.46245	0.0137991	0.0714775		2753.4	-0.329832	0.795629	0.264151	-1.24865	0.211794	0.531023		2753.4	-0.251227	0.840181	0.238594	-1.05295	0.292365	0.973655		2753.4	0.541125	1.45511	0.237974	2.27388	0.022973
T04B8.5	szy-4	2131.93	2388.79	2068.18	3133.38	3416.78	2281.77	3348.67	3396.12	1712.73	1933.15	1815.99	2146.92	1625.18	1901.82	1714.79	1551.14	1285.75		2226.65	0.422471	1.34022	0.171665	2.46102	0.0138541	0.0714775		2226.65	0.618687	1.53548	0.191807	3.22558	0.00125718	0.0983518		2226.65	0.0548882	1.03878	0.172228	0.318695	0.749958	0.978281		2226.65	-0.263126	0.83328	0.172482	-1.52553	0.127128
M03F8.3	C30B5.2	6172.88	5765.15	5615.47	4184.75	4908.84	4071.32	4946.76	5135.73	1600.93	1256.39	1385.41	1286.25	1318.67	1266.66	2071.22	1256.5	1583.01		3166.23	-0.415121	0.749957	0.168686	-2.4609	0.0138588	0.0714775		3166.23	-0.214941	0.861582	0.188577	-1.1398	0.254368	0.577917		3166.23	-0.132228	0.912421	0.17089	-0.773763	0.439071	0.973655		3166.23	0.210422	1.15703	0.170595	1.23346	0.217406
Y71H2AM.17	cpb-2	4124.14	3455.44	4057.61	2706.33	3161.21	2677.01	3463.54	3547.01	2034.3	1525.84	1633.54	1499.05	1806.05	1360.41	2533.58	1747.27	1734.81		2533.36	-0.445742	0.734207	0.181117	-2.46107	0.0138524	0.0714775		2533.36	-0.146175	0.903643	0.202413	-0.722162	0.470195	0.761265		2533.36	-0.154875	0.89821	0.182274	-0.849679	0.395504	0.973655		2533.36	0.2115	1.15789	0.182031	1.16189	0.245281
T07F12.2	rbmx-2	883.059	836.483	888.07	653.898	695.658	558.091	695.352	843.016	166.227	116.971	161.773	121.596	141.668	179.244	181.182	140.606	196.069		438.763	-0.451411	0.731327	0.183472	-2.46038	0.0138788	0.0714775		438.763	-0.176641	0.884761	0.204826	-0.862394	0.388471	0.701998		438.763	-0.0066259	0.995418	0.202861	-0.0326622	0.973944	1		438.763	0.219183	1.16407	0.201405	1.08827	0.276476
T26G10.1	daf-37	1887.7	1667.9	2045.25	1492.23	1515.39	1438.23	1534.04	1581.07	979.553	826.105	928.065	854.019	877.631	804.299	1111.84	841.843	892.703		1251.64	-0.333301	0.793719	0.135441	-2.46085	0.0138607	0.0714775		1251.64	-0.261461	0.834242	0.151533	-1.72544	0.0844481	0.357002		1251.64	-0.108348	0.92765	0.138132	-0.784384	0.432815	0.973655		1251.64	0.0576401	1.04076	0.13786	0.418107	0.675869
M02B7.5	C30B5.6	1172.08	1244.08	1064.49	1569.16	1923.66	1226.89	1855.29	1696.97	368.074	405.22	391.661	424.635	391.147	392.498	473.251	379.725	317.145		899.763	0.438945	1.35561	0.178423	2.46014	0.0138883	0.0714775		899.763	0.614438	1.53096	0.199283	3.08324	0.0020476	0.104704		899.763	0.0527763	1.03726	0.185216	0.284944	0.775687	0.980517		899.763	0.00566556	1.00393	0.185404	0.0305579	0.975622
Y71H2AR.1	C30B5.7	917.187	866.901	1095.39	675.596	628.85	761.2	618.091	717.274	203.826	214.098	203.128	170.044	190.673	299.659	193.063	229.268	248.475		484.278	-0.478947	0.717501	0.194722	-2.45964	0.0139076	0.071502		484.278	-0.52392	0.69548	0.218202	-2.40107	0.0163471	0.203503		484.278	0.0886294	1.06336	0.206654	0.428879	0.668012	0.974801		484.278	0.111858	1.08062	0.206613	0.541387	0.588241
C11D2.4	mrpl-32	936.384	939.903	1226.95	783.099	804.885	728.264	852.924	1024.52	437.336	404.175	445.179	363.837	343.925	454.084	527.705	405.697	566.523		661.494	-0.422375	0.746195	0.171984	-2.4559	0.0140533	0.0719498		661.494	-0.140474	0.907221	0.191995	-0.731657	0.464378	0.756893		661.494	-0.147054	0.903093	0.177209	-0.829833	0.406633	0.973655		661.494	0.221215	1.16572	0.176196	1.25551	0.209294
Y116A8C.36	rpn-3	2256.71	2269.15	2095.09	2810.87	3159.09	2384.24	3078.25	3161.04	5114.45	4620.34	4539.37	4687.13	4772.18	4220.96	5891.88	4648.05	5085.15		3811.41	0.335237	1.26158	0.136496	2.45602	0.0140485	0.0719498		3811.41	0.499323	1.41355	0.152489	3.27449	0.00105853	0.0983518		3811.41	-0.061398	0.958335	0.135502	-0.453116	0.650465	0.973655		3811.41	0.13028	1.09451	0.135442	0.961889	0.336105
C07A12.4	hsp-110	44818.4	46877.5	37903	61348	67067.4	48616.2	64253	69508.9	58342.8	50045.7	56153.4	59399.5	42106.7	54911.1	62014.7	45555.4	43979.2		53700	0.449947	1.36599	0.183182	2.45628	0.0140383	0.0719498		53700	0.630576	1.54818	0.204798	3.07901	0.0020769	0.104704		53700	-0.0730587	0.95062	0.183176	-0.398844	0.690008	0.974801		53700	-0.118676	0.921033	0.183178	-0.647874	0.517067
Y48C3A.7	unc-103	1035.57	1080.84	957.84	1494.2	1465.55	1139.06	1510.66	1523.11	4045.85	3594.76	3759.7	3874.91	3563.09	3652.9	4928.54	3592.16	3155.18		2610.23	0.41471	1.33303	0.168847	2.45614	0.014044	0.0719498		2610.23	0.565876	1.48029	0.188573	3.00082	0.00269251	0.117694		2610.23	-0.0397468	0.972826	0.166385	-0.238885	0.811195	0.988417		2610.23	0.0342787	1.02404	0.166364	0.206047	0.836754
R05D3.8	rege-1	1055.83	837.497	1153.2	649.953	696.719	623.964	677.053	781.785	322.56	243.341	298.003	177.644	209.384	280.356	365.334	248.075	586.401		541.594	-0.62863	0.64679	0.25621	-2.45358	0.0141443	0.0723001		541.594	-0.477499	0.718222	0.286498	-1.66668	0.095579	0.377914		541.594	-0.372183	0.772612	0.263396	-1.41302	0.157651	0.973655		541.594	0.473951	1.38891	0.261	1.8159	0.0693853
C07G2.3	C30F12.3	9858.69	9291.56	11059.5	7713.63	8565.29	6979.8	8772.21	8972.49	3786.62	3407.82	3927.55	3205.18	3149.67	4092.27	3727.6	3415.73	4564.71		6146.49	-0.377305	0.769874	0.153789	-2.4534	0.0141511	0.0723001		6146.49	-0.182676	0.881067	0.171928	-1.06251	0.288002	0.611629		6146.49	-0.0902415	0.939365	0.154525	-0.583994	0.559225	0.973655		6146.49	0.0741744	1.05276	0.154467	0.480197	0.631087
C16C10.4	C30F12.5	5980.91	5099	6403.87	3845.47	3520.71	3685.23	3745.14	4199.77	1115.11	795.818	1177.41	740.023	759.129	1215.18	1484.11	951.104	2339.28		2768.08	-0.66178	0.632098	0.270198	-2.44924	0.0143159	0.0729878		2768.08	-0.552967	0.681617	0.302113	-1.83033	0.0672004	0.328155		2768.08	-0.186048	0.87901	0.272277	-0.683303	0.494415	0.973655		2768.08	0.628706	1.54618	0.271725	2.31376	0.020681
F25B4.4	idhg-2	255.959	254.494	300.01	209.089	174.975	182.981	186.037	183.692	105.871	98.1718	117.985	78.8471	109.593	129.607	124.748	113.738	183.42		165.248	-0.515304	0.699645	0.210454	-2.44854	0.0143438	0.0729878		165.248	-0.547523	0.684194	0.236889	-2.3113	0.0208161	0.21279		165.248	-0.0147556	0.989824	0.225942	-0.0653071	0.947929	0.996321		165.248	0.392645	1.3128	0.222747	1.76274	0.0779444
R06A4.8	col-187	1046.23	1082.87	1076.45	1438.97	1860.04	1090.57	1755.66	1842.39	1232.85	989.029	1159.17	1067.76	1162.75	1086.49	1414.8	1117.68	1547.77		1292.44	0.452973	1.36886	0.184954	2.44911	0.014321	0.0729878		1292.44	0.751555	1.68361	0.206443	3.6405	0.00027211	0.0769616		1292.44	-0.027551	0.981084	0.185251	-0.148722	0.881773	0.993187		1292.44	0.271113	1.20674	0.184973	1.46569	0.142731
Y73B6BL.36	C30F2.2	237.829	211.909	298.017	154.845	144.222	214.088	188.07	155.264	263.193	199.477	215.292	166.244	174.635	198.547	315.831	202.401	242.15		210.707	-0.541189	0.687204	0.221028	-2.4485	0.0143451	0.0729878		210.707	-0.537468	0.688979	0.248495	-2.1629	0.0305492	0.244848		210.707	-0.33071	0.795145	0.221073	-1.49593	0.134673	0.973655		210.707	0.163198	1.11977	0.218794	0.745898	0.455729
T11G6.8	C30F2.3	6348.85	5707.35	6841.43	4564.46	5154.87	4245.15	5029.1	5542.48	2787.27	2113.83	2581.07	2044.33	2030.58	2435.88	3178.11	2126.1	3282.58		3883.14	-0.436511	0.738919	0.178437	-2.4463	0.0144331	0.0733595		3883.14	-0.253078	0.839104	0.199488	-1.26864	0.204569	0.525262		3883.14	-0.20063	0.870171	0.179375	-1.1185	0.263356	0.973655		3883.14	0.198575	1.14756	0.179183	1.10822	0.267765
Y106G6A.1	C30F2.4	868.128	775.648	844.215	642.062	659.603	687.093	666.887	641.829	1108.18	1028.72	1092.27	982.264	994.352	1022.15	1151.45	1041.56	1423.99		919.435	-0.322843	0.799493	0.132004	-2.4457	0.014457	0.0734051		919.435	-0.34164	0.789144	0.148167	-2.30577	0.0211233	0.213325		919.435	-0.106746	0.92868	0.129888	-0.821833	0.411172	0.973655		919.435	0.163753	1.1202	0.129488	1.26462	0.206008
M01F1.7	C30F2.5	504.453	506.96	427.589	769.291	637.333	596.517	682.136	633.082	598.616	745.688	670.202	804.621	804.57	753.743	531.665	700.342	384.91		632.454	0.477248	1.39209	0.195494	2.44124	0.0146369	0.0742418		632.454	0.455476	1.37124	0.218606	2.08355	0.0372014	0.259456		632.454	0.230301	1.17308	0.194005	1.18709	0.235193	0.973655		632.454	-0.316915	0.802784	0.194998	-1.62523	0.104114
F38G1.1	C30F8.3	93.8517	105.448	104.655	154.845	130.436	150.959	132.158	94.0329	288.919	320.625	263.945	312.539	326.105	282.194	291.079	242.702	172.577		203.945	0.521747	1.43569	0.21402	2.43785	0.014775	0.0748651		203.945	0.160475	1.11765	0.243537	0.658934	0.509938	0.790021		203.945	0.0753238	1.0536	0.196822	0.382699	0.701943	0.974801		203.945	-0.308733	0.807351	0.198497	-1.55535	0.119863
F44G4.8	kin-32	2148.99	2320.86	1818	2844.41	2582.21	2833.46	2667.55	2523.58	3689.65	4535.75	4055.27	5222.91	4315.1	3761.36	4227.58	3911.88	3202.17		3332.98	0.393692	1.31375	0.161575	2.43659	0.0148264	0.0749979		3332.98	0.308519	1.23844	0.180722	1.70715	0.0877942	0.364106		3332.98	0.114957	1.08294	0.160766	0.715055	0.474575	0.973655		3332.98	-0.114805	0.923507	0.160849	-0.713741	0.475387
F17C11.4	C30G12.1	419.133	373.122	465.464	332.373	317.076	291.854	314.128	391.439	418.536	406.264	488.968	419.885	450.844	502.802	329.692	470.178	426.474		401.073	-0.418596	0.748152	0.171805	-2.43646	0.0148317	0.0749979		401.073	-0.249899	0.840955	0.191982	-1.30168	0.193027	0.515939		401.073	0.0654573	1.04642	0.169551	0.386062	0.69945	0.974801		401.073	-0.0971643	0.934869	0.170088	-0.571257	0.567825
T23B3.1	C30G12.2	2663.04	2451.66	3043.96	1792.05	1817.62	1623.95	1982.36	2088.41	394.79	300.782	388.012	261.241	291.356	326.316	496.023	300.019	857.465		1239.94	-0.640576	0.641457	0.262989	-2.43575	0.0148609	0.075068		1239.94	-0.418093	0.748413	0.294002	-1.42207	0.155005	0.468495		1239.94	-0.301728	0.81128	0.269755	-1.11852	0.263344	0.973655		1239.94	0.609997	1.52626	0.26788	2.27713	0.0227785
ZK632.8	C30G12.4	782.808	693.521	856.176	538.504	452.814	559.006	495.082	560.917	286.94	277.805	345.44	218.492	247.697	270.244	326.722	276.734	621.639		459.444	-0.589002	0.664803	0.241986	-2.43404	0.0149314	0.075134		459.444	-0.558482	0.679016	0.270907	-2.06152	0.0392531	0.26535		459.444	-0.304486	0.809731	0.247779	-1.22886	0.219124	0.973655		459.444	0.430023	1.34726	0.24571	1.75013	0.0800967
K04G2.5	C30G12.6	2620.38	2779.15	2995.12	2238.84	2128.33	2086.9	2179.58	2174.78	1165.57	1156.13	1215.12	1040.21	1007.72	1254.71	1254.41	1164.25	1752.88		1777.3	-0.379325	0.768797	0.155848	-2.43395	0.0149351	0.075134		1777.3	-0.362088	0.778037	0.174366	-2.0766	0.0378381	0.260636		1777.3	-0.0987186	0.933862	0.157902	-0.625189	0.531847	0.973655		1777.3	0.238401	1.17968	0.157534	1.51333	0.130196
C25F6.1	puf-8	951.315	949.029	984.751	667.705	610.822	699.902	763.464	770.851	110.818	81.4617	104.605	88.3468	90.8816	100.193	113.858	77.9153	190.648		432.739	-0.544079	0.685829	0.223469	-2.43469	0.0149044	0.075134		432.739	-0.326085	0.797698	0.249743	-1.30568	0.191661	0.513483		432.739	-0.0870591	0.94144	0.250189	-0.347973	0.727861	0.975883		432.739	0.366102	1.28887	0.246575	1.48475	0.13761
R07H5.3	gcy-11	495.921	431.93	510.316	340.264	357.373	354.983	352.759	353.17	213.721	225.586	232.32	172.894	166.616	241.749	244.546	208.67	329.794		307.801	-0.450247	0.731917	0.184936	-2.43461	0.014908	0.075134		307.801	-0.441648	0.736293	0.207489	-2.12854	0.0332925	0.249706		307.801	-0.207831	0.865838	0.193428	-1.07446	0.282617	0.973655		307.801	0.222354	1.16664	0.191286	1.16241	0.245067
C14A4.12	hil-1	191.969	236.243	188.379	296.868	273.597	294.599	257.199	256.95	877.64	877.28	1036.32	1080.11	930.2	1063.51	1023.73	764.823	1365.26		647.922	0.488649	1.40313	0.200806	2.43344	0.0149563	0.0751637		647.922	0.322682	1.25065	0.22548	1.43109	0.152405	0.464624		647.922	0.139501	1.10152	0.189522	0.736065	0.461691	0.973655		647.922	0.176641	1.13025	0.189497	0.932153	0.351257
F43G9.12	trh-1	1632.81	1441.79	1734.28	1191.42	1317.08	1117.1	1361.22	1403.93	1143.8	837.594	903.738	838.82	828.627	743.632	1256.39	884.831	1245.09		1169.54	-0.407724	0.753812	0.167589	-2.43288	0.0149795	0.0752033		1169.54	-0.213414	0.862494	0.187303	-1.1394	0.254535	0.577917		1169.54	-0.259476	0.835391	0.169265	-1.53296	0.125286	0.973655		1169.54	0.230332	1.1731	0.168606	1.36609	0.17191
ZK1128.8	C30H6.12	2219.38	1951.79	2335.3	1474.48	1470.85	1410.78	1477.11	1654.32	738.128	641.25	811.297	550.03	613.897	813.491	901.949	736.165	1611.93		1259.54	-0.578861	0.669492	0.238033	-2.43185	0.0150218	0.0752878		1259.54	-0.470137	0.721896	0.266184	-1.76621	0.077361	0.347764		1259.54	-0.147412	0.902869	0.240536	-0.612847	0.539977	0.973655		1259.54	0.569502	1.48401	0.239759	2.37531	0.0175342
K09F5.6	C30H6.5	1493.1	1455.99	1124.29	2113.58	1998.96	1815.17	1822.76	1687.13	2829.82	3354.55	2782.98	3684.92	3790.3	2818.26	2771.19	3128.25	1556.81		2366.36	0.541284	1.45527	0.222592	2.43173	0.0150269	0.0752878		2366.36	0.370276	1.2926	0.248989	1.48712	0.136983	0.445123		2366.36	0.198939	1.14785	0.221617	0.897671	0.369361	0.973655		2366.36	-0.266314	0.831441	0.221783	-1.20079	0.229833
Y97E10AR.7	haf-1	1167.81	1142.69	1238.91	793.948	721.109	808.775	704.501	849.577	688.655	580.676	807.648	506.332	547.963	794.188	881.158	798.855	1678.79		865.387	-0.610976	0.654753	0.251451	-2.42981	0.0151069	0.0753585		865.387	-0.606718	0.656689	0.281411	-2.15599	0.0310845	0.245441		865.387	-0.16767	0.890279	0.252712	-0.663483	0.507021	0.973655		865.387	0.694048	1.61782	0.251801	2.75634	0.00584529
F39H11.5	dlat-2	6565.35	6382.62	7506.24	4292.25	4399.83	3876.45	4353.07	4877.68	1879.95	1543.6	2349.96	1422.1	1375.7	1960.65	2443.48	1621	4824.03		3627.88	-0.702605	0.614462	0.289141	-2.42997	0.0151001	0.0753585		3627.88	-0.562931	0.676925	0.323281	-1.7413	0.0816302	0.35478		3627.88	-0.278798	0.824277	0.290048	-0.961214	0.336445	0.973655		3627.88	0.622686	1.53974	0.289729	2.1492	0.0316188
F17A2.13	C30H6.8	1548.55	1437.74	1621.65	970.491	1094.39	1028.35	1138.59	1189.63	386.874	212.009	293.137	190.943	215.621	306.093	526.715	288.376	440.93		758.24	-0.575066	0.671255	0.236631	-2.43023	0.0150894	0.0753585		758.24	-0.399966	0.757876	0.264556	-1.51184	0.130574	0.434942		758.24	-0.324425	0.798617	0.245108	-1.3236	0.185636	0.973655		758.24	0.492314	1.4067	0.242761	2.02798	0.0425621
Y54E10BR.2	C30H6.9	1103.82	959.168	1186.09	674.609	749.741	677.944	782.779	881.285	280.014	297.649	344.223	240.341	224.531	273.002	278.208	319.721	696.634		586.457	-0.628178	0.646993	0.258523	-2.42988	0.015104	0.0753585		586.457	-0.380444	0.768201	0.288923	-1.31677	0.187916	0.509088		586.457	-0.320491	0.800797	0.26503	-1.20926	0.226562	0.973655		586.457	0.491244	1.40566	0.262944	1.86824	0.0617281
ZK637.5	erp-44.1	3201.62	3080.29	3286.16	2566.28	2395.57	2536.11	2423.57	2698.53	1088.39	1074.67	1102	1047.81	956.93	1155.43	1202.93	1003.05	1505.31		1901.45	-0.351681	0.78367	0.144752	-2.42955	0.0151177	0.0753585		1901.45	-0.316612	0.802953	0.161931	-1.95522	0.0505566	0.291459		1901.45	-0.0471165	0.967869	0.147486	-0.319464	0.749375	0.978209		1901.45	0.18489	1.13673	0.147199	1.25605	0.209096
Y40B1A.4	zmp-3	3733.8	3321.6	3012.06	2552.47	2604.48	2837.12	2588.25	2670.1	1356.53	1151.95	1264.99	1117.16	1135.13	1139.81	1641.53	1202.76	1459.23		2046.41	-0.332535	0.79414	0.137078	-2.42587	0.0152716	0.0760486		2046.41	-0.351998	0.783498	0.1534	-2.29465	0.0217533	0.214103		2046.41	-0.153794	0.898883	0.139582	-1.10182	0.270541	0.973655		2046.41	0.189197	1.14013	0.13917	1.35946	0.173999
F25G6.6	tag-10	92.7852	90.2388	114.622	144.982	163.31	158.278	145.373	106.06	421.505	543.078	497.482	656.426	691.413	604.833	253.457	589.29	323.469		329.212	0.647795	1.56677	0.267156	2.42478	0.0153176	0.0762002		329.212	0.342329	1.2678	0.301071	1.13704	0.255523	0.578531		329.212	0.417708	1.3358	0.249648	1.67319	0.0942903	0.973655		329.212	-0.325003	0.798297	0.251001	-1.29483	0.195379
T11F9.11	cytb-5.1	1735.19	1542.17	1944.58	1205.22	1281.03	1101.54	1320.56	1391.91	1359.5	803.129	1192.01	721.024	798.333	1168.3	1549.45	1116.79	1657.1		1287.52	-0.541628	0.686995	0.223771	-2.42046	0.0155009	0.0768787		1287.52	-0.360067	0.779128	0.250166	-1.43931	0.150062	0.462653		1287.52	-0.319772	0.801197	0.224669	-1.4233	0.154649	0.973655		1287.52	0.365905	1.28869	0.224079	1.63293	0.102484
Y45F10A.4	tbc-19	401.003	387.317	440.547	289.964	293.746	290.939	299.896	324.742	180.079	129.503	178.802	113.046	117.612	147.991	173.261	158.517	270.16		246.89	-0.490688	0.711686	0.202705	-2.42069	0.0154909	0.0768787		246.89	-0.391606	0.76228	0.226953	-1.7255	0.0844381	0.357002		246.89	-0.366073	0.775892	0.21604	-1.69447	0.0901757	0.973655		246.89	0.303314	1.23398	0.211729	1.43256	0.151984
Y69F12A.2	lntl-1	1001.44	926.722	1207.02	763.374	908.81	683.433	888.505	927.208	448.22	371.8	442.747	431.284	362.636	482.579	492.062	390.472	493.336		660.097	-0.413158	0.750978	0.170683	-2.42061	0.0154944	0.0768787		660.097	-0.203218	0.868611	0.190695	-1.06567	0.286571	0.609862		660.097	0.015635	1.0109	0.175682	0.0889961	0.929085	0.994499		660.097	0.123664	1.0895	0.175415	0.704982	0.480821
Y75B8A.17	oops-1	4343.84	3794.09	4416.43	2636.3	3018.05	2633.09	3154.5	3405.96	1360.49	963.964	1455.96	779.922	838.428	1262.98	1833.6	1153.5	2452.22		2323.73	-0.599226	0.660108	0.247805	-2.41814	0.0156002	0.0772933		2323.73	-0.351369	0.78384	0.277022	-1.26838	0.204663	0.525262		2323.73	-0.391594	0.762287	0.2495	-1.56951	0.116528	0.973655		2323.73	0.525053	1.43899	0.24888	2.10966	0.0348878
C05D11.1	tbc-7	2519.06	2640.25	2884.48	2117.52	2259.83	1901.17	2281.24	2562.94	2185.69	1751.43	2073.85	1725.14	1784.67	1818.18	2395.96	1717.72	2203.75		2166.05	-0.357683	0.780417	0.147973	-2.41722	0.0156396	0.0774103		2166.05	-0.146795	0.903255	0.165372	-0.887665	0.374721	0.690072		2166.05	-0.173977	0.886396	0.148451	-1.17195	0.241217	0.973655		2166.05	0.0715598	1.05085	0.148272	0.482624	0.629363
F30A10.1	dpy-8	647.363	679.326	735.573	512.861	434.786	601.092	482.883	490.939	287.929	367.622	351.521	370.487	385.801	463.276	321.771	419.13	319.855		463.072	-0.41225	0.751451	0.170725	-2.4147	0.015748	0.0778688		463.072	-0.497722	0.708224	0.191763	-2.59551	0.00944501	0.176629		463.072	0.277284	1.21191	0.174913	1.58526	0.112907	0.973655		463.072	0.0765144	1.05447	0.175635	0.435644	0.663095
F43D2.1	C31H2.3	2112.73	2026.82	2566.53	1498.15	1419.95	1429.99	1499.48	1602.93	602.574	479.371	631.279	458.833	463.318	590.126	673.244	459.431	1217.98		1160.75	-0.625111	0.64837	0.259063	-2.41297	0.0158233	0.0781622		1160.75	-0.527167	0.693916	0.289706	-1.81966	0.0688108	0.331409		1160.75	-0.179727	0.88287	0.262498	-0.68468	0.493546	0.973655		1160.75	0.456715	1.37241	0.261652	1.7455	0.0808971
F27C1.6	C31H2.4	1686.13	1392.11	1777.14	1048.41	1367.99	1164.67	1383.59	1360.2	656.993	486.682	510.862	607.978	520.342	420.074	699.976	539.138	652.36		957.331	-0.4394	0.737441	0.182198	-2.41166	0.0158803	0.0782865		957.331	-0.238433	0.847665	0.203638	-1.17087	0.241651	0.565997		957.331	-0.096653	0.9352	0.186496	-0.518257	0.604279	0.973655		957.331	0.191951	1.14231	0.185923	1.03242	0.301875
[truncated: 6,138 more rows]
[truncated: 1 more columns]

## Sheet: elegans alone 446 F3
Gene	CELEG:HB101_1	CELEG:HB101_2	CELEG:HB101_3	CELEG:BB446_1	CELEG:BB446_2	CELEG:BB446_3	CELEG:NACL_2	CELEG:NACL_3	CKAMA:HB101_1	CKAMA:HB101_2	CKAMA:HB10_3	CKAMA:BB446_1	CKAMA:BB446_2	CKAMA:BB446_3	CKAMA:NACL_1	CKAMA:NACL_2	CKAMA:NACL_3		baseMean:CELEG:BB446	log2FoldChange:CELEG:BB446	Fold change	lfcSE:CELEG:BB446	stat:CELEG:BB446	pvalue:CELEG:BB446	padj:CELEG:BB446		baseMean:CELEG:NACL	log2FoldChange:CELEG:NACL	Fold change	lfcSE:CELEG:NACL	stat:CELEG:NACL	pvalue:CELEG:NACL	padj:CELEG:NACL		baseMean:CKAMA:BB446	log2FoldChange:CKAMA:BB446	Fold change	lfcSE:CKAMA:BB446	stat:CKAMA:BB446	pvalue:CKAMA:BB446	padj:CKAMA:BB446		baseMean:CKAMA:NACL	log2FoldChange:CKAMA:NACL	Fold change	lfcSE:CKAMA:NACL	stat:CKAMA:NACL	pvalue:CKAMA:NACL	padj:CKAMA:NACL
[truncated: 2 more rows]

[truncated: 3 more sheets: kamaaina alone 446 F3, elegans alone NaCl F3, kamaaina alone NaCl F3]
