# Supplementary material for: Intergenerational adaptations to stress are evolutionarily conserved, stress-specific, and have deleterious trade-offs
Source: eLife. 2021 Oct 8;10:e73425. doi: 10.7554/eLife.73425 (PMC8570697; doi:10.7554/eLife.73425)
Supplement: Supplementary file 7. [file elife-73425-supp7.xlsx]

## Sheet: All data
	Alternate gene nam	CELEG:HB101_1	CELEG:HB101_2	CELEG:HB101_3	CELEG:15C5_1	CELEG:15C5_2	CELEG:15C5_3	CELEG:Aeromonas_1	CELEG:Aeromonas_2	CELEG:Aeromonas_3	CELEG:Serretia_1	CELEG:Serretia_2	CELEG:Serretia_3	CELEG:P. vranovensis 427_1	CELEG:P. vranovensis_2	CELEG:P. vranovensis_3		baseMeanAeromonas	log2FoldChangeAeromona	Fold Change	lfcSEAeromonas	statAeromonas	pvalueAeromonas	padjAeromonas		baseMeanI5C5	log2FoldChangeI5C5	Fold Change	lfcSE15C5	stat15C5	pvalue15C5	padj15C5		baseMeanB248	log2FoldChangeSerretia	Fold Change	lfcSESerretia	statSerretia	pvalueSerretia	padjSerretia		baseMeanB427	log2FoldChangeP. vranovensisB427	Fold Change	lfcSEP. vranovensisB427	statP. vranovensisB427	pvalueP. Vraonvensis	padjP. Vranovensis
2L52.1	2L52.1	1228.77	1392.67	1282.03	1327.34	1478.7	1388.8	1776.9	1362.92	1596.6	1841.57	1523.6	1592.79	1212.38	1234.24	1087.72		1345.53	0.278755	1.21315	0.121254	2.29893	0.0215088	0.0914348		1345.53	0.103821	1.07462	0.121865	0.851932	0.394252	0.519375		1345.53	0.344811	1.26998	0.121209	2.84475	0.00444458	0.0188536		1345.53	-0.14336	0.905408	0.121548	-1.17945	0.23822	0.339817
2RSSE.1	rga-9	3288.81	4214.94	5867.59	8303.6	8394.04	7228.49	4124.09	2581.44	3634.27	3879.43	2415.13	3070.26	3990.93	4604.59	4300.52		4890.18	-0.370994	0.77325	0.213102	-1.74092	0.0816976	0.211172		4890.18	0.839428	1.78934	0.21288	3.9432	8.04021e-05	0.000413768		4890.18	-0.513867	0.700343	0.21316	-2.41071	0.0159217	0.0491541		4890.18	-0.0522257	0.964447	0.212964	-0.245233	0.806276	0.860506
2RSSE.3	2RSSE.3	170.637	237.188	370.198	371.75	397.888	337.36	212.108	139.69	186.124	185.169	143.386	163.616	251.154	291.559	299.679		260.193	-0.533308	0.690968	0.229564	-2.32314	0.0201718	0.0876085		260.193	0.508529	1.4226	0.226099	2.24915	0.024503	0.0563374		260.193	-0.661111	0.632391	0.230502	-2.86813	0.00412905	0.0179061		260.193	0.114478	1.08258	0.225899	0.506766	0.612319	0.702734
2RSSE.4	2RSSE.4	1.90655	0.922911	0	0	2.32683	1.12453	0	0	0	0	0.975416	0	0	0.850026	0		0.565423	-2.39877	0.189626	2.22759	-1.07685	0.281549	NA		0.565423	0.292247	1.22455	2.06691	0.141393	0.887559	NA		0.565423	-1.40774	0.376902	2.22757	-0.631962	0.527412	NA		0.565423	-1.63571	0.321812	2.22759	-0.734296	0.462769	NA
2RSSE.6	2RSSE.6	32.4114	40.6081	43.3311	71.4903	65.1512	53.9775	44.0223	16.9894	43.6229	30.3555	25.3608	26.6122	25.8664	31.4509	24.7598		37.7388	-0.157687	0.896461	0.313024	-0.503752	0.614435	0.756625		37.7388	0.710587	1.63647	0.302135	2.35188	0.0186786	0.0450162		37.7388	-0.50028	0.70697	0.32199	-1.55371	0.120253	0.218681		37.7388	-0.504038	0.70513	0.316338	-1.59335	0.111081	0.184757
2RSSE.8	2RSSE.8	0	0	0	0	0	0	0	0.943854	0	0	0	0.985637	0	0	0		0.107194	1.00963	2.01339	5.2679	0.191656	0.848012	NA		0.107194	0	1	5.2679	0	1	NA		0.107194	1.03882	2.05455	5.26765	0.197208	0.843665	NA		0.107194	0	1	5.2679	0	1	NA
3R5.1	pot-3	347.946	284.257	193.106	122.725	86.0927	96.7097	296.15	380.373	375.157	251.951	293.6	323.289	191.912	179.355	145.143		215.964	0.350095	1.27464	0.217271	1.61133	0.107108	0.250858		215.964	-1.43437	0.370008	0.230629	-6.21939	4.99098e-10	1.06312e-08		215.964	0.0744475	1.05296	0.218309	0.34102	0.733089	0.813079		215.964	-0.676109	0.625851	0.220669	-3.06391	0.00218463	0.006737
3R5.2	3R5.2	139.178	126.439	137.529	312.174	304.815	318.243	155.079	122.701	130.869	204.394	149.239	123.205	110.141	120.704	112.7		185.516	0.0187384	1.01307	0.17737	0.105646	0.915864	0.954899		185.516	1.21432	2.32032	0.170562	7.11955	1.08279e-12	4.05543e-11		185.516	0.241314	1.18207	0.175611	1.37414	0.169398	0.281665		185.516	-0.230664	0.852242	0.177867	-1.29683	0.194688	0.290239
4R79.1	nas-6	125.833	145.82	185.57	95.3204	154.734	141.691	84.0427	134.971	98.8786	102.197	154.116	127.147	195.249	226.107	243.329		145.03	-0.522972	0.695937	0.234471	-2.23044	0.0257184	0.102113		145.03	-0.222095	0.85732	0.234055	-0.9489	0.342671	0.467062		145.03	-0.25322	0.839022	0.23238	-1.08968	0.275855	0.403486		145.03	0.539545	1.45351	0.226438	2.38275	0.0171838	0.0388626
4R79.2	4R79.2	32.4114	25.8415	61.2287	30.9791	22.1049	26.9888	16.0081	29.2595	18.4186	20.237	26.3362	28.5835	53.4015	59.5018	65.7415		35.01	-0.903074	0.534746	0.350118	-2.57934	0.00989887	0.0555649		35.01	-0.577425	0.670159	0.347981	-1.65936	0.0970437	0.173072		35.01	-0.666953	0.629836	0.344027	-1.93867	0.0525419	0.118417		35.01	0.580791	1.49567	0.317481	1.82937	0.0673436	0.122115
4R79.5	21ur-10202	0	0.922911	1.88396	0	0	0	0	0	0	0	0	0	0.834399	0	0.853785		0.30761	-2.38994	0.190791	3.31374	-0.72122	0.470774	NA		0.30761	-2.13396	0.227832	3.31374	-0.643972	0.519594	NA		0.30761	-2.36066	0.194702	3.31367	-0.712401	0.476216	NA		0.30761	-0.733643	0.601383	3.26128	-0.224955	0.822014	NA
AC3.1	sri-20	17.159	17.5353	14.1297	4.76602	10.4707	6.74719	5.00254	35.8664	16.4798	19.2252	15.6067	23.6553	10.0128	11.0503	12.8068		14.1132	0.238523	1.17978	0.49712	0.47981	0.631363	0.768781		14.1132	-1.14977	0.450698	0.567187	-2.02714	0.0426482	0.0883204		14.1132	0.260147	1.1976	0.497304	0.523114	0.600895	NA		14.1132	-0.528216	0.693412	0.513859	-1.02794	0.303978	0.410309
AC3.10	spe-10	8.57949	3.69164	0	4.76602	8.1439	2.24906	1.00051	18.8771	1.9388	6.0711	7.80333	6.89946	17.5224	11.9004	15.3681		7.72073	0.841644	1.79209	0.878712	0.957816	0.338156	NA		7.72073	0.304476	1.23497	0.916303	0.332287	0.739672	0.818495		7.72073	0.76287	1.69686	0.882771	0.864177	0.387491	NA		7.72073	1.87089	3.65759	0.848149	2.20585	0.0273943	0.0576155
AC3.13	AC3.13	0	1.84582	5.65188	1.1915	0	0	0	0.943854	0	0	0	0	0.834399	0	0		1.27928	-2.84567	0.139113	1.79147	-1.58846	0.112183	NA		1.27928	-2.58969	0.166121	1.79147	-1.44557	0.148298	NA		1.27928	-3.77821	0.0728863	1.79145	-2.10902	0.0349429	NA		1.27928	-3.0444	0.121211	1.79147	-1.69939	0.0892457	NA
AC3.14	AC3.14	0.953277	0.922911	0.94198	0	1.16341	0	2.00102	0.943854	0.969398	3.03555	2.92625	0	0.834399	0	0		0.9313	0.468665	1.38383	1.54739	0.302874	0.761986	NA		0.9313	-1.17706	0.442252	1.80658	-0.65154	0.514698	NA		0.9313	1.07953	2.11334	1.49079	0.724129	0.468987	NA		0.9313	-1.63177	0.322691	1.80658	-0.903239	0.366399	NA
AC3.15	AC3.15	0	0	0	0	1.16341	0	0	0	0	0	0	0	0	0	0		0.0646342	0	1	5.2679	0	1	NA		0.0646342	1.2656	2.40428	5.2679	0.240248	0.810138	NA		0.0646342	0	1	5.26765	0	1	NA		0.0646342	0	1	5.2679	0	1	NA
AC3.16	AC3.16	0.953277	2.76873	9.4198	3.57451	3.49024	1.12453	1.00051	0	0	1.01185	0	0.985637	1.6688	1.70005	3.41514		4.28122	-3.6549	0.0793898	1.38239	-2.6439	0.0081957	NA		4.28122	-0.690837	0.619494	0.905408	-0.763013	0.445456	NA		4.28122	-2.72812	0.150923	1.25014	-2.18226	0.0290906	NA		4.28122	-0.956334	0.515365	0.885072	-1.08052	0.279913	NA
AC3.2	ugt-49	725.444	612.813	435.195	452.772	410.685	431.82	960.488	1077.88	951.948	1083.69	1125.63	1131.51	569.06	577.167	490.927		690.526	0.753915	1.68636	0.155242	4.85639	1.19543e-06	9.24762e-05		690.526	-0.453293	0.730374	0.159021	-2.85052	0.00436473	0.0132108		690.526	0.913754	1.88394	0.155053	5.89318	3.78838e-09	7.30067e-07		690.526	-0.115232	0.923234	0.156524	-0.736193	0.461613	0.567641
AC3.3	abu-1	16.2057	23.0728	69.7065	22.6386	36.0659	31.4869	8.00406	7.55083	6.78578	7.08295	6.82791	12.8133	13.3504	19.5506	22.1984		43.7226	-2.28685	0.204922	0.492011	-4.64797	3.35219e-06	0.000191094		43.7226	-0.271953	0.828198	0.422286	-0.644003	0.519574	0.636125		43.7226	-2.02707	0.245352	0.478239	-4.23862	2.24896e-05	0.000436042		43.7226	-0.984872	0.505271	0.428443	-2.29872	0.0215206	0.0469525
AC3.4	pqn-2	9.53277	9.22911	30.1433	19.0641	18.6146	14.6189	6.00305	6.60698	2.90819	6.0711	3.90166	1.97127	10.0128	9.35028	17.0757		21.4235	-1.6545	0.317648	0.540939	-3.05857	0.00222397	0.0197877		21.4235	0.0959019	1.06873	0.456801	0.209943	0.833713	0.886862		21.4235	-2.03791	0.243516	0.579411	-3.51722	0.000436098	0.00341404		21.4235	-0.424845	0.744919	0.459161	-0.925264	0.354829	0.464024
AC3.5	AC3.5	11.4393	23.9957	26.3754	4.76602	16.2878	19.117	11.0056	9.43854	5.81639	11.1304	10.7296	13.7989	22.5288	20.4006	29.8825		20.9913	-1.23848	0.42382	0.447041	-2.77039	0.00559898	0.0375586		20.9913	-0.615277	0.652805	0.427238	-1.44013	0.149832	0.245716		20.9913	-0.795121	0.576295	0.424997	-1.87089	0.061361	0.133358		20.9913	0.234225	1.17627	0.383389	0.610933	0.541244	0.64103
AC3.6	col-151	3.81311	4.61456	6.59386	4.76602	5.81707	8.99626	8.00406	6.60698	3.87759	4.0474	2.92625	6.89946	5.84079	5.95018	1.70757		5.39797	0.29739	1.22892	0.66383	0.447991	0.654159	NA		5.39797	0.387063	1.30773	0.673826	0.574425	0.56568	0.677095		5.39797	-0.115237	0.923231	0.69274	-0.16635	0.867882	NA		5.39797	-0.152319	0.899803	0.679314	-0.224225	0.822582	0.872092
AC3.7	ugt-1	139.178	141.205	130.935	112.001	91.9098	92.2116	160.081	173.669	152.195	146.718	181.427	160.659	109.306	100.303	118.676		127.384	0.240795	1.18164	0.169757	1.41847	0.156053	0.318374		127.384	-0.47531	0.719312	0.181151	-2.62384	0.00869455	0.0236502		127.384	0.249477	1.18878	0.169931	1.4681	0.142076	0.247153		127.384	-0.32544	0.798055	0.173272	-1.8782	0.0603534	0.111643
AC3.8	ugt-2	51.477	56.2976	68.7645	39.3197	59.3342	83.2154	35.0178	45.305	25.2043	43.5096	39.9921	49.2819	50.064	44.2013	65.7415		54.0208	-0.740918	0.598359	0.291827	-2.5389	0.0111202	0.0598841		54.0208	0.0461142	1.03248	0.281552	0.163785	0.8699	0.912582		54.0208	-0.411093	0.752053	0.285594	-1.43943	0.150028	0.257578		54.0208	-0.142238	0.906113	0.277559	-0.51246	0.608329	0.699289
AC3.9	AC3.9	7.62622	4.61456	5.65188	5.95752	2.32683	4.49813	10.0051	13.214	11.6328	16.1896	16.5821	11.8276	12.516	11.0503	8.53785		8.48498	0.966304	1.95383	0.532157	1.81582	0.0693974	NA		8.48498	-0.485466	0.714266	0.643751	-0.75412	0.450777	0.573398		8.48498	1.31991	2.49651	0.521087	2.533	0.011309	NA		8.48498	0.84684	1.79856	0.52924	1.60011	0.109575	0.182736
AC7.1	tkr-3	18.1123	18.4582	24.4915	9.53204	8.1439	10.1208	9.00457	29.2595	16.4798	15.1778	27.3116	16.7558	28.3696	29.7509	24.7598		17.5678	-0.151615	0.900242	0.434106	-0.349258	0.726896	0.835729		17.5678	-1.13456	0.455474	0.488316	-2.32342	0.0201569	0.0479197		17.5678	-0.0416989	0.97151	0.431794	-0.0965711	0.923067	NA		17.5678	0.440973	1.35752	0.41584	1.06044	0.288946	0.394987
AC7.11	21ur-4118	0	0	0.94198	1.1915	0	1.12453	0	0	0	0	0.975416	0	0	0.850026	0		0.575755	-0.913951	0.53073	2.49332	-0.36656	0.713948	NA		0.575755	1.19837	2.2948	2.42298	0.494585	0.620893	NA		0.575755	0.0770828	1.05488	2.49329	0.030916	0.975337	NA		0.575755	-0.150888	0.900696	2.49332	-0.0605169	0.951744	NA
AC7.15	21ur-2269	0	0	0	0	0	0	0	0	0	0	0	0	0	0	0		0.0571906	0	1	5.2679	0	1	NA		0.0571906	0	1	5.2679	0	1	NA		0.0571906	0	1	5.26765	0	1	NA		0.0571906	0	1	5.2679	0	1	NA
AC7.17	21ur-3864	0	0.922911	0	0	0	0	0	0	0	0	0	0	0	0	0		0.0512728	-0.913941	0.530733	5.2679	-0.173492	0.862264	NA		0.0512728	-0.657962	0.633773	5.2679	-0.1249	0.900603	NA		0.0512728	-0.884666	0.541613	5.26765	-0.167943	0.866628	NA		0.0512728	-1.11267	0.462437	5.2679	-0.211217	0.832718	NA
AC7.18	21ur-2318	0	0.922911	0	1.1915	0	3.3736	1.00051	0	0.969398	0	0	0.985637	0	0.850026	1.70757		0.72625	0.953464	1.93652	2.07431	0.459653	0.645765	NA		0.72625	2.18489	4.54693	1.94803	1.12159	0.262037	NA		0.72625	0.077087	1.05489	2.1579	0.0357231	0.971503	NA		0.72625	1.33637	2.52515	1.98992	0.671569	0.501858	NA
AC7.2	soc-2	1113.43	1248.7	1578.76	2430.67	2817.79	2460.48	1114.57	903.268	1124.5	963.281	769.603	1003.38	1685.49	1689	1769.04		1692.14	-0.326863	0.797268	0.146774	-2.22698	0.0259483	0.102608		1692.14	0.967992	1.95612	0.145644	6.64627	3.00607e-11	8.39033e-10		1692.14	-0.526433	0.694269	0.147149	-3.57754	0.000346843	0.0028855		1692.14	0.384214	1.30515	0.145745	2.63621	0.00838372	0.0212158
AC7.21	21ur-6716	0	0.922911	0	0	0	0	0	0	0	0	0	0	0	0	0		0.0512728	-0.913941	0.530733	5.2679	-0.173492	0.862264	NA		0.0512728	-0.657962	0.633773	5.2679	-0.1249	0.900603	NA		0.0512728	-0.884666	0.541613	5.26765	-0.167943	0.866628	NA		0.0512728	-1.11267	0.462437	5.2679	-0.211217	0.832718	NA
AC7.22	21ur-12303	20.9721	25.8415	32.9693	23.8301	37.2293	29.2378	23.0117	16.9894	28.1125	21.2489	17.5575	21.684	39.2168	32.301	33.2976		27.817	-0.23047	0.852357	0.322753	-0.714075	0.475181	0.647682		27.817	0.179131	1.1322	0.318071	0.56318	0.573312	0.683636		27.817	-0.400603	0.757542	0.329503	-1.21578	0.224069	0.346625		27.817	0.393715	1.31377	0.302086	1.30332	0.192465	0.287429
AC7.24	21ur-8507	0	0	0	0	0	0	0	0	0	0	0	0	0	0	0.853785		0.163814	0	1	5.2679	0	1	NA		0.163814	0	1	5.2679	0	1	NA		0.163814	0	1	5.26765	0	1	NA		0.163814	0.810897	1.7543	5.2679	0.153932	0.877664	NA
AC7.27	21ur-7559	0	0	0	1.1915	0	1.12453	0	0	0	0	0	0	0	0	0		0.186553	0	1	5.21021	0	1	NA		0.186553	2.15978	4.46847	5.17696	0.417191	0.676539	NA		0.186553	0	1	5.20996	0	1	NA		0.186553	0	1	5.21021	0	1	NA
AC7.3	AC7.3	0.953277	0	0	0	0	0	0	0	0	0	0	0	0	0	0.853785		0.100392	-0.913941	0.530733	5.2679	-0.173492	0.862264	NA		0.100392	-0.657962	0.633773	5.2679	-0.1249	0.900603	NA		0.100392	-0.884652	0.541618	5.26765	-0.167941	0.86663	NA		0.100392	-0.150887	0.900697	5.2679	-0.0286426	0.97715	NA
AC7.5	21ur-4409	0	0	0	1.1915	0	0	0	0	0	0	0	0	0	0	0.853785		0.171512	0	1	5.2679	0	1	NA		0.171512	1.2656	2.40428	5.2679	0.240248	0.810138	NA		0.171512	0	1	5.26765	0	1	NA		0.171512	0.810897	1.7543	5.2679	0.153932	0.877664	NA
AC7.51	21ur-15344	0	0	0	0	0	0	0	0	0	0	0	0	0.834399	0	0		0.103546	0	1	5.2679	0	1	NA		0.103546	0	1	5.2679	0	1	NA		0.103546	0	1	5.26765	0	1	NA		0.103546	0.810897	1.7543	5.2679	0.153932	0.877664	NA
AC7.60	21ur-11568	0	0	0	0	0	1.12453	0	0	0	0	0	0	0	0	0		0.062474	0	1	5.2679	0	1	NA		0.062474	1.2656	2.40428	5.2679	0.240248	0.810138	NA		0.062474	0	1	5.26765	0	1	NA		0.062474	0	1	5.2679	0	1	NA
AC7.63	21ur-7649	0	0	0	0	0	0	0	0	0	0	0	0	0	0.850026	0		0.0472236	0	1	5.2679	0	1	NA		0.0472236	0	1	5.2679	0	1	NA		0.0472236	0	1	5.26765	0	1	NA		0.0472236	0.810897	1.7543	5.2679	0.153932	0.877664	NA
AC7.65	21ur-8784	20.9721	25.8415	32.0273	21.4471	31.4122	28.1133	23.0117	16.9894	28.1125	21.2489	16.5821	18.7271	39.2168	30.6009	31.5901		26.3747	-0.213293	0.862566	0.328508	-0.649279	0.516158	0.681673		26.3747	0.0396092	1.02784	0.328604	0.120538	0.904057	0.936052		26.3747	-0.480966	0.716498	0.338682	-1.42011	0.155575	0.264743		26.3747	0.36329	1.28636	0.30914	1.17516	0.239929	0.341767
AC7.77	21ur-9238	0	0	0.94198	0	0	0	0	0	0	0	0	0	0	0	0		0.0523322	-0.913941	0.530733	5.2679	-0.173492	0.862264	NA		0.0523322	-0.657962	0.633773	5.2679	-0.1249	0.900603	NA		0.0523322	-0.884666	0.541613	5.26765	-0.167943	0.866628	NA		0.0523322	-1.11267	0.462437	5.2679	-0.211217	0.832718	NA
AC7.78	21ur-13011	0	0	0	0	0	0	0	0	0	0	0	0	0	0	0		0.0591905	0	1	5.2679	0	1	NA		0.0591905	0	1	5.2679	0	1	NA		0.0591905	0	1	5.26765	0	1	NA		0.0591905	0	1	5.2679	0	1	NA
AC7.79	21ur-10994	0	0	0	0	0	0	0	0	0	0	0	0	0	0	0		0.0571906	0	1	5.2679	0	1	NA		0.0571906	0	1	5.2679	0	1	NA		0.0571906	0	1	5.26765	0	1	NA		0.0571906	0	1	5.2679	0	1	NA
AC7.80	21ur-7532	0	0	0	0	0	0	0	0	0	0	0	0	0	0	0.853785		0.0474325	0	1	5.2679	0	1	NA		0.0474325	0	1	5.2679	0	1	NA		0.0474325	0	1	5.26765	0	1	NA		0.0474325	0.810897	1.7543	5.2679	0.153932	0.877664	NA
AC7.83	21ur-9616	2.85983	3.69164	2.82594	3.57451	4.65366	3.3736	2.00102	0	0	0	0.975416	1.97127	0.834399	0	2.56136		1.91968	-2.26375	0.20823	1.34206	-1.68677	0.091648	NA		1.91968	0.305597	1.23593	0.98748	0.309471	0.756963	NA		1.91968	-1.66214	0.315971	1.20935	-1.3744	0.169317	NA		1.91968	-1.4697	0.361058	1.13435	-1.29563	0.195103	NA
AC8.1	AC8.1	49.5704	60.9121	49.9249	50.0432	50.0268	49.4794	56.0284	39.6419	43.6229	47.557	29.2625	33.5117	35.8792	39.1012	36.7128		49.8479	-0.206759	0.866481	0.243076	-0.850594	0.394995	0.578709		49.8479	-0.101968	0.931761	0.246357	-0.413905	0.678943	0.770972		49.8479	-0.543204	0.686245	0.251552	-2.15941	0.0308182	0.079814		49.8479	-0.523113	0.695869	0.245602	-2.12992	0.0331782	0.0676214
AC8.10	AC8.10	17.159	36.9164	99.8498	52.4262	59.3342	53.9775	35.0178	18.8771	26.1737	22.2607	15.6067	28.5835	44.2232	46.7514	37.5666		46.4456	-0.945261	0.519336	0.430116	-2.19769	0.0279713	0.107273		46.4456	0.106548	1.07665	0.41747	0.255224	0.79855	0.862371		46.4456	-1.21249	0.431524	0.436766	-2.77606	0.00550217	0.0221789		46.4456	-0.260075	0.835044	0.416433	-0.624531	0.532279	0.633192
AC8.11	AC8.11	22.8786	29.5332	77.2423	58.3837	57.0073	56.2266	36.0183	15.1017	24.2349	26.3081	12.6804	27.5978	33.376	47.6014	40.1279		43.3003	-0.786426	0.579779	0.403829	-1.94742	0.0514841	0.158125		43.3003	0.40451	1.32364	0.387626	1.04356	0.296691	0.41925		43.3003	-0.962812	0.513056	0.408894	-2.35467	0.018539	0.0550225		43.3003	-0.0986248	0.933923	0.388243	-0.254029	0.799473	0.855709
AC8.12	AC8.12	36.2245	33.2248	48.041	38.1282	41.8829	30.3624	40.0203	29.2595	31.9901	40.474	43.8937	43.368	41.72	45.0514	27.3211		38.4646	-0.216096	0.860892	0.278869	-0.774901	0.438398	0.616858		38.4646	-0.0913634	0.938635	0.282261	-0.323684	0.746177	0.823285		38.4646	0.121437	1.08782	0.271887	0.446647	0.65513	0.749481		38.4646	-0.0412373	0.971821	0.27057	-0.152409	0.878865	0.912971
AC8.13	mir-258.2	1.90655	7.38329	12.2457	7.14903	5.81707	8.99626	4.00203	0.943854	2.90819	3.03555	2.92625	2.95691	6.67519	3.4001	5.9765		5.86972	-1.4687	0.361309	0.754767	-1.94589	0.0516676	NA		5.86972	0.0282829	1.0198	0.648128	0.0436378	0.965193	0.977843		5.86972	-1.27408	0.413489	0.735934	-1.73124	0.0834093	NA		5.86972	-0.425039	0.744818	0.648047	-0.655878	0.511903	0.6145
AC8.2	AC8.2	0	0	1.88396	3.57451	0	0	0	0	0	2.0237	0	0	0	0	0		0.589942	-1.81281	0.284637	2.73746	-0.662222	0.507829	NA		0.589942	0.91681	1.88794	2.60486	0.351961	0.724867	NA		0.589942	0.0956371	1.06854	2.67045	0.0358132	0.971431	NA		0.589942	-2.01154	0.248009	2.73746	-0.734819	0.46245	NA
AC8.3	AC8.3	15.2524	28.6102	76.3003	34.5536	45.3732	43.8567	30.0152	16.9894	20.3573	16.1896	11.705	25.6266	36.7136	36.5511	29.0287		36.5777	-0.837578	0.559582	0.434736	-1.92664	0.0540251	0.162909		36.5777	0.0433057	1.03047	0.422411	0.10252	0.918344	0.946004		36.5777	-1.16715	0.445301	0.444386	-2.62643	0.00862866	0.0309584		36.5777	-0.23223	0.851318	0.419705	-0.553317	0.580046	0.67504
AC8.4	AC8.4	24.7852	34.1477	84.7782	65.5328	61.661	57.3511	38.0193	16.9894	26.1737	29.3437	13.6558	29.5691	33.376	47.6014	42.6893		46.4033	-0.82712	0.563653	0.399686	-2.06943	0.0385061	0.131577		46.4033	0.360476	1.28385	0.38455	0.937397	0.348554	0.47341		46.4033	-0.987306	0.504419	0.404039	-2.44359	0.0145418	0.0459202		46.4033	-0.217046	0.860325	0.386056	-0.562214	0.57397	0.669987
AC8.5	AC8.5	29.5516	35.0706	37.6792	41.7027	48.8634	39.3586	41.0208	21.7086	38.7759	36.4266	15.6067	26.6122	22.5288	26.3508	26.4673		35.5125	-0.015014	0.989647	0.305807	-0.0490963	0.960843	0.980596		35.5125	0.343989	1.26926	0.30355	1.13322	0.257122	0.37519		35.5125	-0.383237	0.766715	0.315985	-1.21283	0.225193	0.347943		35.5125	-0.442114	0.736055	0.311351	-1.41999	0.155612	0.242536
AC8.6	AC8.6	2.85983	1.84582	2.82594	1.1915	1.16341	1.12453	3.00152	1.88771	1.9388	5.05925	2.92625	3.94255	3.3376	2.55008	1.70757		2.42422	-0.14395	0.905038	0.935924	-0.153805	0.877764	NA		2.42422	-1.11264	0.462446	1.12821	-0.986206	0.324032	NA		2.42422	0.662959	1.58333	0.867324	0.764373	0.444645	NA		2.42422	0.0163423	1.01139	0.900313	0.0181518	0.985518	NA
AC8.7	AC8.7	40.9909	37.8394	55.5768	41.7027	47.7	35.985	44.0223	32.091	36.8371	46.5451	47.7954	50.2675	46.7264	47.6014	29.8825		43.4365	-0.252599	0.839383	0.268714	-0.940031	0.347202	0.533833		43.4365	-0.10088	0.932464	0.271201	-0.371977	0.70991	0.795665		43.4365	0.106141	1.07635	0.261817	0.405401	0.685183	0.774415		43.4365	-0.112662	0.92488	0.261645	-0.430593	0.666764	0.748887
AC8.8	mir-258.1	1.90655	11.0749	15.0717	15.4896	11.6341	14.6189	8.00406	1.88771	3.87759	6.0711	3.90166	3.94255	10.0128	5.95018	10.2454		9.83212	-1.04145	0.48584	0.62582	-1.66413	0.0960862	NA		9.83212	0.570337	1.48487	0.549088	1.0387	0.298945	0.421489		9.83212	-1.01728	0.494047	0.62624	-1.62442	0.104286	NA		9.83212	-0.100558	0.932672	0.557532	-0.180362	0.856868	0.896587
AC8.9	AC8.9	28.5983	25.8415	18.8396	20.2556	19.7781	21.3661	29.0147	17.9332	17.4492	21.2489	11.705	16.7558	18.3568	15.3005	16.2219		20.0227	-0.189928	0.876649	0.349389	-0.543602	0.586716	0.735014		20.0227	-0.254527	0.838262	0.360417	-0.706201	0.480063	0.600671		20.0227	-0.562543	0.677107	0.363562	-1.54731	0.121789	NA		20.0227	-0.554269	0.681002	0.354823	-1.5621	0.118264	0.194623
AH10.1	acs-10	0.953277	3.69164	1.88396	1.1915	1.16341	2.24906	4.00203	0.943854	0	4.0474	0	0.985637	2.5032	0	1.70757		1.9263	-0.41851	0.748197	1.23823	-0.337992	0.735369	NA		1.9263	-0.502496	0.705884	1.28172	-0.392049	0.695022	NA		1.9263	-0.391128	0.762533	1.23844	-0.315825	0.752136	NA		1.9263	-0.633695	0.644524	1.24013	-0.510989	0.609359	NA
AH10.10	AH10.10	0	0	1.88396	0	2.32683	0	0	0.943854	1.9388	0	0	0	2.5032	0	0		0.533146	0.616998	1.53368	2.98476	0.206716	0.836232	NA		0.533146	0.304457	1.23495	3.04087	0.100122	0.920248	NA		0.533146	-1.78379	0.290419	3.09774	-0.575837	0.564726	NA		0.533146	0.414168	1.33253	2.98508	0.138746	0.889651	NA
AH10.2	AH10.2	83.8884	62.758	54.6348	59.5752	44.2098	55.1021	57.029	79.2837	83.3682	96.1258	72.1808	100.535	46.7264	35.7011	23.906		60.3222	0.128021	1.09279	0.258845	0.494583	0.620894	0.761012		60.3222	-0.340915	0.78954	0.270187	-1.26177	0.20703	0.316366		60.3222	0.417683	1.33578	0.255895	1.63225	0.102627	0.193924		60.3222	-0.918582	0.529029	0.272675	-3.36878	0.000755023	0.00269746
AH10.4	AH10.4	2.85983	1.84582	0.94198	1.1915	0	0	0	2.83156	0.969398	0	0.975416	0.985637	2.5032	0	1.70757		1.10957	-0.555568	0.680389	1.43385	-0.387465	0.698412	NA		1.10957	-2.17891	0.220842	1.70796	-1.27574	0.202048	NA		1.10957	-1.51525	0.349836	1.60442	-0.944421	0.344954	NA		1.10957	-0.419693	0.747584	1.39534	-0.300782	0.763581	NA
AH10.8	AH10.8	0	0	0	0	0	0	0	0	0	0	0.975416	0	0.834399	0.850026	0		0.205654	0	1	4.34032	0	1	NA		0.205654	0	1	4.34032	0	1	NA		0.205654	1.03885	2.05459	4.34017	0.239358	0.810828	NA		0.205654	1.70105	3.25137	4.30066	0.395532	0.69245	NA
AH6.1	gcy-1	0	0.922911	0.94198	0	0	0	0	0	0.969398	0	0	0	0	0.850026	0.853785		0.369192	-0.840831	0.558322	2.63842	-0.318688	0.749963	NA		0.369192	-1.54664	0.342306	2.63842	-0.586201	0.55774	NA		0.369192	-1.77336	0.292526	2.63838	-0.67214	0.501494	NA		0.369192	-0.136777	0.909549	2.57088	-0.0532024	0.957571	NA
AH6.10	sra-6	2.85983	0	0.94198	0	0	2.24906	0	0	0	2.0237	0	0	3.3376	0.850026	0.853785		1.0752	-2.82022	0.141588	1.87397	-1.50494	0.132338	NA		1.0752	-0.725814	0.604656	1.78294	-0.407089	0.683942	NA		1.0752	-0.920099	0.528473	1.77634	-0.517976	0.604475	NA		1.0752	0.41679	1.33495	1.57251	0.265048	0.790973	NA
AH6.11	sra-7	2.85983	0	0.94198	0	0	0	0	0	0	1.01185	0	0	0	0	0		0.735644	-2.82315	0.141301	2.35828	-1.19713	0.231258	NA		0.735644	-2.56717	0.168735	2.35828	-1.08858	0.276339	NA		0.735644	-1.83212	0.280852	2.35825	-0.776899	0.437219	NA		0.735644	-3.02188	0.123118	2.35828	-1.28139	0.200055	NA
AH6.13	sra-16	0	0	0	1.1915	0	0	0	0.943854	0.969398	0	0	0	0.834399	0	0		0.218842	1.88667	3.69781	4.21439	0.447673	0.654389	NA		0.218842	1.26561	2.40429	4.25371	0.297531	0.766061	NA		0.218842	0	1	4.25357	0	1	NA		0.218842	0.810901	1.75431	4.25371	0.190634	0.848812	NA
AH6.17	AH6.17	0	0	0	0	0	0	0	0.943854	0.969398	0	0	0	0	0.850026	0		0.153515	1.88574	3.69542	5.23628	0.36013	0.71875	NA		0.153515	0	1	5.2679	0	1	NA		0.153515	0	1	5.26765	0	1	NA		0.153515	0.810897	1.7543	5.2679	0.153932	0.877664	NA
AH6.2	sfxn-1.1	0	0.922911	0.94198	2.38301	0	0	0	0	0	0	0	0	0	0	0		0.235994	-1.80025	0.287125	4.83121	-0.372629	0.709424	NA		0.235994	0.349241	1.27389	4.79254	0.0728718	0.941908	NA		0.235994	-1.77095	0.293016	4.83101	-0.36658	0.713933	NA		0.235994	-1.99898	0.250177	4.83121	-0.413764	0.679047	NA
AH6.3	AH6.3	0	0.922911	0	0	0	1.12453	0	0	0.969398	0	0	0	0	1.70005	0		0.26205	0.0478427	1.03372	4.07273	0.0117471	0.990627	NA		0.26205	0.303823	1.23441	4.07273	0.0745993	0.940534	NA		0.26205	-0.884658	0.541616	4.07261	-0.217221	0.828036	NA		0.26205	0.750961	1.68291	4.0294	0.18637	0.852154	NA
AH6.4	sra-1	0.953277	2.76873	2.82594	2.38301	1.16341	3.3736	1.00051	2.83156	3.87759	0	0.975416	2.95691	6.67519	5.10015	2.56136		2.5979	0.238072	1.17942	0.98237	0.242344	0.808513	NA		2.5979	0.0807917	1.0576	1.02549	0.0787837	0.937205	NA		2.5979	-0.731039	0.60247	1.10701	-0.660369	0.509017	NA		2.5979	1.12882	2.18679	0.909221	1.24152	0.214414	NA
AH6.5	mex-6	6270.66	7053.81	7127.02	6782.05	5684.44	5491.09	7892.01	3942.48	6175.06	6467.75	4505.45	5022.81	2408.08	2340.12	2039.69		5548.81	-0.183499	0.880565	0.200485	-0.915273	0.360048	0.545604		5548.81	-0.187636	0.878044	0.200541	-0.935649	0.349454	0.474215		5548.81	-0.354521	0.782129	0.200527	-1.76795	0.0770701	0.157705		5548.81	-1.59116	0.331903	0.200852	-7.92207	2.33586e-15	1.8382e-13
AH6.7	sra-3	0	1.84582	0.94198	2.38301	2.32683	3.3736	2.00102	2.83156	0.969398	0	1.95083	1.97127	4.172	3.4001	0		1.62205	1.0502	2.07082	1.36369	0.770118	0.44123	NA		1.62205	1.52843	2.88472	1.34537	1.13607	0.255929	NA		1.62205	0.491242	1.40565	1.42641	0.344389	0.730554	NA		1.62205	1.43474	2.70333	1.32061	1.08642	0.277294	NA
AH6.8	sra-4	0	0	0.94198	0	1.16341	0	0	0.943854	0	0	0	0	0	0.850026	0		0.333007	0.0478429	1.03372	2.99257	0.0159872	0.987245	NA		0.333007	0.303824	1.23441	2.99257	0.101526	0.919133	NA		0.333007	-0.884685	0.541606	2.99252	-0.295632	0.767511	NA		0.333007	-0.150888	0.900696	2.99257	-0.0504208	0.959787	NA
AH9.1	AH9.1	40.0376	35.0706	29.2014	28.5961	18.6146	28.1133	39.0198	35.8664	48.4699	38.4503	33.1641	46.325	33.376	37.4011	32.4438		33.8306	0.241948	1.18259	0.274009	0.882996	0.377239	0.561602		33.8306	-0.46908	0.722425	0.301205	-1.55734	0.11939	0.204513		33.8306	0.177316	1.13078	0.276011	0.642426	0.520597	0.635954		33.8306	-0.0148245	0.989777	0.275233	-0.0538617	0.957045	0.970346
AH9.2	crn-4	393.703	327.633	240.205	227.577	165.205	187.797	402.204	414.352	435.26	396.645	501.364	412.982	181.065	189.556	143.436		290.401	0.380781	1.30205	0.181347	2.09974	0.035752	0.125573		290.401	-0.72828	0.603623	0.188231	-3.86906	0.000109254	0.000544444		290.401	0.447556	1.36373	0.181232	2.46952	0.0135296	0.0434453		290.401	-0.903127	0.534726	0.186272	-4.84843	1.24442e-06	1.05869e-05
AH9.3	AH9.3	2618.65	1869.82	1473.26	1711	1412.39	1653.06	2566.3	2692.81	2671.66	2816.99	3112.55	3239.79	1582.02	1427.19	1263.6		1993.56	0.4118	1.33034	0.169084	2.43548	0.0148722	0.0722974		1993.56	-0.319745	0.801211	0.169823	-1.88282	0.0597254	0.116651		1993.56	0.621159	1.53811	0.168995	3.6756	0.000237291	0.00219186		1993.56	-0.480453	0.716753	0.169548	-2.83372	0.00460091	0.0127289
AH9.4	AH9.4	13.3459	17.5353	15.0717	13.1066	5.81707	11.2453	10.0051	24.5402	11.6328	12.1422	13.6558	15.7702	19.1912	24.6507	24.7598		15.8143	0.0124687	1.00868	0.415255	0.0300265	0.976046	0.988828		15.8143	-0.609152	0.655582	0.457067	-1.33274	0.182617	0.286932		15.8143	-0.144951	0.90441	0.422438	-0.34313	0.731501	NA		15.8143	0.576417	1.49114	0.393126	1.46624	0.142583	0.226
AH9.5	mir-248	0	0	0.94198	0	0	0	0	0	0	0	0	0	0	0	0		0.0523322	-0.913941	0.530733	5.2679	-0.173492	0.862264	NA		0.0523322	-0.657962	0.633773	5.2679	-0.1249	0.900603	NA		0.0523322	-0.884666	0.541613	5.26765	-0.167943	0.866628	NA		0.0523322	-1.11267	0.462437	5.2679	-0.211217	0.832718	NA
AH9.6	AH9.6	96.281	101.52	165.788	61.9583	86.0927	86.589	63.032	120.813	92.0928	70.8295	79.0087	91.6643	135.173	136.854	169.049		105.902	-0.395993	0.759966	0.256265	-1.54525	0.122286	0.27338		105.902	-0.630638	0.645891	0.261982	-2.40718	0.0160762	0.0396158		105.902	-0.589857	0.664409	0.258639	-2.28062	0.0225711	0.0634299		105.902	0.278649	1.21306	0.249698	1.11595	0.264445	0.368899
AH9.7	AH9.7	35.2712	27.6873	23.5495	19.0641	17.4512	23.6152	32.0163	30.2033	38.7759	34.4029	23.41	42.3824	29.204	29.7509	26.4673		27.6738	0.223924	1.16791	0.304164	0.736195	0.461612	0.635803		27.6738	-0.5218	0.696502	0.33552	-1.5552	0.119899	0.205097		27.6738	0.211853	1.15818	0.305117	0.694335	0.487472	0.60715		27.6738	-0.0172574	0.988109	0.305144	-0.0565549	0.9549	0.969324
AH9.8	linc-78	2.85983	2.76873	5.65188	0	1.16341	1.12453	3.00152	2.83156	2.90819	2.0237	2.92625	10.842	5.0064	1.70005	2.56136		2.98086	-0.367786	0.774971	0.906867	-0.405557	0.685068	NA		2.98086	-2.28525	0.20515	1.27835	-1.78765	0.0738324	NA		2.98086	0.488052	1.40255	0.849439	0.574558	0.56559	NA		2.98086	-0.280168	0.823495	0.883616	-0.31707	0.751191	NA
AH9.9	AH9.9	7.62622	5.53747	7.53584	2.38301	2.32683	7.87172	6.00305	5.66312	6.78578	6.0711	6.82791	9.85637	6.67519	5.95018	5.9765		6.27247	-0.164792	0.892057	0.594839	-0.277037	0.781752	NA		6.27247	-0.703058	0.614269	0.658976	-1.0669	0.286019	0.406909		6.27247	0.139135	1.10124	0.578657	0.240445	0.809985	NA		6.27247	-0.152304	0.899812	0.582167	-0.261615	0.793618	0.850777
B0001.1	lin-24	2243.06	1792.29	1607.02	2030.32	1952.21	2256.94	1895.96	2594.65	2139.46	2079.35	2687.27	2420.73	2052.62	2014.56	1880.04		2053.3	0.232892	1.17519	0.14961	1.55666	0.119551	0.269043		2053.3	0.145227	1.1059	0.149884	0.968931	0.33258	0.456971		2053.3	0.349265	1.27391	0.14955	2.33544	0.0195206	0.0571641		2053.3	0.0759731	1.05407	0.149581	0.507907	0.611519	0.701958
B0001.10	B0001.10	37.1778	40.6081	29.2014	50.0432	32.5756	51.7285	37.0188	56.6312	51.3781	52.6162	45.8446	42.3824	18.3568	18.7006	19.6371		36.9045	0.440624	1.35719	0.275489	1.59942	0.109727	0.253946		36.9045	0.328552	1.25575	0.282732	1.16206	0.245211	0.361343		36.9045	0.395481	1.31538	0.276821	1.42865	0.153104	0.26143		36.9045	-0.916869	0.529657	0.305031	-3.00583	0.0026486	0.00792064
B0001.11	B0001.11	0	0.922911	2.82594	4.76602	2.32683	4.49813	1.00051	1.88771	0	1.01185	0	2.95691	2.5032	1.70005	3.41514		2.06082	-0.369921	0.773825	1.33461	-0.277174	0.781646	NA		2.06082	1.62644	3.08751	1.13746	1.42989	0.15275	NA		2.06082	0.0788671	1.05619	1.26716	0.0622392	0.950372	NA		2.06082	1.02062	2.02878	1.14752	0.889408	0.373784	NA
B0001.12	B0001.12	2.85983	0.922911	0.94198	0	0	2.24906	2.00102	0	0	1.01185	1.95083	0	2.5032	2.55008	0		1.1182	-1.26306	0.41666	1.64352	-0.768508	0.442186	NA		1.1182	-1.03999	0.486331	1.65073	-0.630019	0.528682	NA		1.1182	-0.667438	0.629624	1.53853	-0.433816	0.664422	NA		1.1182	0.10277	1.07383	1.42129	0.0723077	0.942357	NA
B0001.2	B0001.2	681.593	884.149	742.28	490.9	537.498	447.564	831.422	583.302	720.262	617.229	458.446	573.641	403.015	400.362	357.736		547.719	-0.112942	0.9247	0.158114	-0.714308	0.475037	0.647545		547.719	-0.645323	0.639349	0.160277	-4.02631	5.66585e-05	0.000307301		547.719	-0.485166	0.714415	0.159071	-3.04999	0.00228847	0.0115185		547.719	-0.991232	0.503048	0.159905	-6.19889	5.68615e-10	1.27848e-08
B0001.3	B0001.3	900.847	1082.57	1014.51	1089.04	976.105	994.086	1189.6	834.367	1033.38	1102.92	966.637	986.623	802.692	830.475	805.12		943.855	0.0278297	1.01948	0.130653	0.213004	0.831324	0.905602		943.855	0.0289839	1.02029	0.131141	0.221013	0.825082	0.88073		943.855	0.0275509	1.01928	0.130705	0.210787	0.833054	0.887497		943.855	-0.298214	0.813259	0.130886	-2.27843	0.0227011	0.0491371
B0001.4	B0001.4	1856.03	1546.8	1148.27	2011.26	1973.15	2007.29	2023.03	1334.61	1736.19	2060.13	2686.3	1625.32	1060.52	1120.33	1044.18		1729.9	0.162442	1.11918	0.196924	0.824899	0.409429	0.590937		1729.9	0.396774	1.31656	0.196939	2.0147	0.043936	0.0905791		1729.9	0.485524	1.40009	0.196738	2.46787	0.0135921	0.0435567		1729.9	-0.496879	0.708638	0.197302	-2.51836	0.0117902	0.028302
B0001.5	B0001.5	950.417	1080.73	1259.43	1577.55	1469.39	1406.79	1168.59	672.024	957.765	1162.62	877.874	967.896	796.851	791.374	779.506		1096.62	-0.234121	0.850203	0.174541	-1.34136	0.179805	0.348422		1096.62	0.436596	1.35341	0.174023	2.50884	0.0121129	0.0313101		1096.62	-0.129493	0.914153	0.174435	-0.742353	0.457873	0.581193		1096.62	-0.474853	0.71954	0.174602	-2.71963	0.00653542	0.0171458
B0001.6	eri-12	4423.21	4862.82	5688.61	9298.5	9495.79	8820.83	5344.71	3643.28	4668.62	5405.3	3778.76	4450.15	5187.46	5168.16	5189.31		6150.86	-0.132992	0.911938	0.153787	-0.864781	0.387159	0.571181		6150.86	0.882927	1.84411	0.153589	5.74862	8.99733e-09	1.4018e-07		6150.86	-0.135335	0.910458	0.153797	-0.879961	0.378881	0.506727		6150.86	0.0539177	1.03808	0.153673	0.350859	0.725694	0.79794
B0001.7	B0001.7	1303.13	1494.19	1530.72	1489.38	1311.17	1170.64	1764.9	790.006	1433.74	1794.01	1102.22	1320.75	657.507	653.67	583.989		1217.1	-0.11803	0.921445	0.228483	-0.516581	0.605449	0.749435		1217.1	-0.124236	0.91749	0.228704	-0.543219	0.586979	0.694617		1217.1	-0.037604	0.974272	0.228444	-0.164609	0.869251	0.913675		1217.1	-1.19139	0.437882	0.229405	-5.19338	2.06506e-07	2.20628e-06
B0001.8	B0001.8	1439.45	1406.52	1133.2	1400.02	1202.97	1188.63	1693.86	1290.25	1398.84	1505.63	1757.7	1410.45	776.826	756.523	738.524		1262.64	0.139235	1.10132	0.136395	1.02082	0.307339	0.492104		1262.64	-0.0698062	0.952766	0.137037	-0.509397	0.610474	0.71451		1262.64	0.232169	1.1746	0.136322	1.70309	0.0885507	0.174277		1262.64	-0.808567	0.570949	0.137541	-5.87874	4.13405e-09	7.15587e-08
B0001.9	21ur-15547	0	0	0	1.1915	0	1.12453	0	0	0.969398	0	0	0	0	0	0		0.240409	1.00963	2.0134	4.13183	0.244355	0.806956	NA		0.240409	2.15984	4.46867	4.08981	0.528103	0.597428	NA		0.240409	0	1	4.1317	0	1	NA		0.240409	0	1	4.13183	0	1	NA
B0019.1	amx-2	230.693	256.569	325.925	517.113	547.968	435.194	235.119	158.567	225.87	219.571	132.657	194.171	284.53	317.06	282.603		338.791	-0.3932	0.761439	0.200548	-1.96062	0.049923	0.155262		338.791	0.883314	1.84461	0.196378	4.49802	6.85884e-06	4.8236e-05		338.791	-0.574386	0.671572	0.201821	-2.84601	0.00442704	0.018827		338.791	0.120709	1.08727	0.19735	0.611651	0.540769	0.640646
B0019.2	B0019.2	765.481	828.774	771.481	870.99	874.888	775.927	922.468	660.698	847.253	861.084	662.308	672.205	501.474	498.965	463.605		746.222	0.0384803	1.02703	0.140053	0.274756	0.783504	0.872149		746.222	0.0919505	1.06581	0.140499	0.654455	0.512819	0.629788		746.222	-0.10799	0.92788	0.140436	-0.768963	0.441915	0.566405		746.222	-0.692345	0.618847	0.14137	-4.89739	9.71183e-07	8.54018e-06
B0019.4	anr-14	87.7015	96.9057	90.43	148.938	151.244	122.574	115.058	92.4977	100.817	107.256	79.0087	84.7648	66.7519	56.1017	57.2036		105.615	0.16354	1.12003	0.186652	0.876175	0.380935	0.565062		105.615	0.618901	1.5357	0.184371	3.35683	0.000788428	0.00304515		105.615	-0.0227544	0.984352	0.189462	-0.1201	0.904404	0.93718		105.615	-0.610968	0.654757	0.195079	-3.1319	0.00173678	0.00551706
B0024.1	col-149	5.71966	6.46038	2.82594	13.1066	13.961	10.1208	9.00457	9.43854	7.75518	5.05925	13.6558	2.95691	10.8472	18.7006	11.953		8.6243	0.802962	1.74468	0.61379	1.3082	0.190804	NA		8.6243	1.30648	2.47338	0.603804	2.16375	0.0304832	0.0671443		8.6243	0.533401	1.44734	0.628079	0.849258	0.395738	NA		8.6243	1.46581	2.76219	0.584857	2.50628	0.0122011	0.0291353
B0024.10	asps-1	992.361	968.134	623.591	677.966	594.505	579.134	1166.59	969.338	1144.86	1047.26	1182.2	960.996	607.443	635.819	543.861		806.292	0.344259	1.2695	0.165426	2.08104	0.0374302	0.129263		806.292	-0.481091	0.716436	0.167492	-2.87232	0.00407464	0.0124884		806.292	0.30413	1.23467	0.165518	1.83745	0.0661439	0.140914		806.292	-0.532008	0.691592	0.166538	-3.19451	0.0014007	0.00458925
B0024.11	B0024.11	1192.55	1326.22	992.847	913.884	864.417	919.867	1541.78	1183.59	1290.27	1446.95	1495.31	1282.31	755.131	772.673	800.851		1064.53	0.193183	1.14328	0.128603	1.50216	0.133055	0.288566		1064.53	-0.380217	0.768322	0.130115	-2.92217	0.00347602	0.010885		1064.53	0.266586	1.20296	0.128544	2.0739	0.0380886	0.0934874		1064.53	-0.592747	0.663079	0.129582	-4.57431	4.77799e-06	3.43845e-05
B0024.12	gna-1	1042.89	781.706	429.543	487.326	386.254	417.201	836.425	1524.32	1122.56	971.376	1158.79	1256.69	781.832	641.769	625.825		739.067	0.628083	1.54551	0.255116	2.46196	0.0138182	0.0690004		739.067	-0.804393	0.572603	0.257631	-3.12226	0.00179467	0.00617652		739.067	0.587459	1.5026	0.255172	2.30221	0.0213234	0.0609215		739.067	-0.137266	0.909241	0.255662	-0.536903	0.591335	0.684987
B0024.13	B0024.13	1081.02	782.629	671.631	743.499	564.256	697.21	842.428	841.918	935.469	951.139	970.539	1006.34	440.563	449.664	356.028		746.061	0.0474573	1.03344	0.165867	0.286117	0.774789	0.866371		746.061	-0.338487	0.790871	0.167165	-2.02487	0.0428812	0.0887381		746.061	0.207925	1.15503	0.165664	1.2551	0.209441	0.32954		746.061	-1.02433	0.491638	0.167789	-6.10488	1.02877e-09	2.15093e-08
B0024.14	crm-1	331.74	446.689	531.277	585.029	606.139	510.537	424.215	331.293	411.025	384.503	317.01	336.102	483.952	549.967	498.611		450.915	-0.167608	0.890317	0.164985	-1.0159	0.309676	0.494496		450.915	0.377351	1.29895	0.164029	2.30052	0.0214189	0.0504544		450.915	-0.33641	0.79201	0.165755	-2.02956	0.0424013	0.101033		450.915	0.226456	1.16996	0.163205	1.38756	0.165271	0.254486
B0024.15	B0024.15	22.8786	19.3811	22.6075	3.57451	11.6341	5.62266	13.0066	24.5402	17.4492	16.1896	19.5083	18.7271	20.0256	30.6009	22.1984		16.802	-0.233479	0.850581	0.386366	-0.604294	0.545648	0.704897		16.802	-1.6364	0.321658	0.477838	-3.42459	0.000615718	0.0024522		16.802	-0.251819	0.839837	0.387951	-0.649101	0.516273	NA		16.802	0.167002	1.12272	0.369897	0.451483	0.651641	0.73628
B0024.17	B0024.17	0	0	0	0	0	1.12453	0	0	0	0	0	0	0	1.70005	0		0.216112	0	1	5.00286	0	1	NA		0.216112	1.26561	2.40428	5.00286	0.252977	0.800286	NA		0.216112	0	1	5.00264	0	1	NA		0.216112	1.71305	3.27853	4.96762	0.344843	0.730212	NA
B0024.18	B0024.18	0	0.922911	0	1.1915	0	0	0	0	0	1.01185	0	0	0	0	0		0.173681	-0.913941	0.530733	5.2679	-0.173492	0.862264	NA		0.173681	0.303821	1.23441	5.2679	0.057674	0.954008	NA		0.173681	0.0770509	1.05486	5.26765	0.0146272	0.98833	NA		0.173681	-1.11267	0.462437	5.2679	-0.211217	0.832718	NA
B0024.2	col-150	24.7852	12.9208	13.1877	3.57451	8.1439	6.74719	15.0076	25.4841	20.3573	12.1422	27.3116	9.85637	37.548	34.851	29.8825		18.7311	0.262672	1.1997	0.419754	0.625776	0.531462	0.693745		18.7311	-1.456	0.364503	0.522791	-2.78505	0.00535199	0.0157067		18.7311	-0.0405511	0.972283	0.429863	-0.094335	0.924843	NA		18.7311	1.00939	2.01306	0.40032	2.52146	0.0116869	0.0280981
B0024.3	B0024.3	142.038	131.976	78.1843	46.4687	53.5171	51.7285	121.061	213.311	143.471	126.481	171.673	155.731	102.631	95.2029	140.021		106.777	0.441209	1.35774	0.254728	1.73208	0.0832599	0.213293		106.777	-1.21456	0.430906	0.276699	-4.38945	1.13638e-05	7.53359e-05		106.777	0.366325	1.28907	0.255347	1.43462	0.151396	0.259421		106.777	-0.060196	0.959134	0.256656	-0.23454	0.814566	0.866186
B0024.4	B0024.4	33.3647	31.379	21.6655	10.7235	15.1244	17.9925	15.0076	68.9013	24.2349	11.1304	15.6067	34.4973	45.892	29.7509	43.543		32.7827	0.327254	1.25462	0.468312	0.698794	0.484681	0.656114		32.7827	-0.97631	0.508278	0.505592	-1.93102	0.0534804	0.106373		32.7827	-0.49558	0.709276	0.484069	-1.02378	0.305939	0.433386		32.7827	0.464131	1.37949	0.46416	0.999938	0.31734	0.424636
B0024.6	gcy-6	6.67294	11.0749	11.3038	5.95752	9.30732	4.49813	10.0051	11.3262	7.75518	7.08295	10.7296	6.89946	13.3504	5.95018	16.2219		10.8103	0.000922359	1.00064	0.499899	0.00184509	0.998528	NA		10.8103	-0.560371	0.678128	0.550277	-1.01834	0.308515	0.431545		10.8103	-0.233186	0.850754	0.513619	-0.454006	0.649825	NA		10.8103	0.288545	1.22141	0.479615	0.601617	0.547429	0.646554
B0024.8	che-12	275.497	273.182	440.846	349.111	408.359	328.363	275.14	214.255	212.298	212.489	224.346	246.409	393.002	423.313	377.373		319.242	-0.496427	0.70886	0.185452	-2.67685	0.00743182	0.0457435		319.242	0.133937	1.09728	0.183668	0.729235	0.465858	0.587081		319.242	-0.534119	0.69058	0.18582	-2.87439	0.00404805	0.0176419		319.242	0.270703	1.2064	0.18162	1.49049	0.136095	0.218054
B0024.9	trx-2	1269.76	1003.2	407.877	417.027	337.39	326.114	765.389	1646.08	1235.98	1075.6	1139.29	1297.1	1059.69	998.78	1072.35		820.38	0.444347	1.3607	0.298438	1.48891	0.136511	0.293638		820.38	-1.31109	0.403016	0.301239	-4.35232	1.34703e-05	8.74593e-05		820.38	0.389628	1.31006	0.298493	1.30532	0.191785	0.308629		820.38	0.223874	1.16787	0.298452	0.750118	0.453184	0.559421
B0025.1	vps-34	1605.32	2012.87	2370.96	2285.31	2194.2	2060.14	2297.17	1548.86	1931.04	1780.86	1232.93	1554.35	1560.33	1655	1527.42		1855.03	-0.0521722	0.964483	0.170167	-0.306594	0.759153	0.856048		1855.03	0.126798	1.09187	0.170224	0.744888	0.456339	0.578136		1855.03	-0.39087	0.762669	0.170466	-2.29296	0.0218504	0.0620115		1855.03	-0.336657	0.791874	0.17023	-1.97766	0.0479674	0.0920156
B0025.2	csn-2	7077.13	5674.06	4123.04	3393.41	3069.09	3442.19	6932.52	7268.62	6504.66	7700.18	8162.28	8005.35	3804.86	3659.36	3100.95		5015.51	0.295231	1.22708	0.157027	1.88013	0.0600904	0.174514		5015.51	-0.768618	0.586979	0.157491	-4.88038	1.05879e-06	9.39808e-06		5015.51	0.500261	1.41447	0.156991	3.18656	0.00143977	0.00824369		5015.51	-0.67548	0.626124	0.157247	-4.29567	1.74164e-05	0.000105768
B0025.4	B0025.4	2675.85	2049.79	1307.47	764.946	758.546	822.033	2131.08	3141.15	2732.73	2381.9	2382.94	3034.78	1602.88	1398.29	1253.36		1674.78	0.408079	1.32692	0.212328	1.92193	0.0546147	0.164064		1674.78	-1.36292	0.388796	0.214149	-6.36435	1.96124e-10	4.59299e-09		1674.78	0.370535	1.29283	0.212356	1.74488	0.0810062	0.1635		1674.78	-0.50385	0.705222	0.212707	-2.36875	0.0178485	0.0401786
B0025.5	B0025.5	3.81311	2.76873	1.88396	2.38301	2.32683	2.24906	4.00203	0.943854	1.9388	2.0237	3.90166	4.92819	2.5032	3.4001	4.26893		2.46539	-0.308659	0.807392	0.948156	-0.325536	0.744776	NA		2.46539	-0.282097	0.822395	0.974677	-0.289426	0.772256	NA		2.46539	0.362667	1.2858	0.890347	0.407332	0.683764	NA		2.46539	0.264743	1.20142	0.881122	0.300461	0.763826	NA
B0025.6	B0025.6	0	0.922911	0	2.38301	3.49024	2.24906	2.00102	0	0	0	0	0	0	0	0		0.789946	0.967775	1.95582	2.236	0.432816	0.665148	NA		0.789946	3.0079	8.04395	2.06721	1.45506	0.145654	NA		0.789946	-0.884692	0.541603	2.31594	-0.382001	0.702461	NA		0.789946	-1.11268	0.462433	2.31597	-0.48044	0.630915	NA
B0025.7	B0025.7	80.0753	85.8307	117.747	125.108	98.8903	93.3361	94.0477	45.305	74.6436	62.7347	36.0904	66.0377	38.3824	41.6513	42.6893		76.0232	-0.408943	0.753175	0.269136	-1.51947	0.128645	0.282535		76.0232	0.16102	1.11808	0.265677	0.606074	0.544466	0.659092		76.0232	-0.783942	0.580778	0.274759	-2.8532	0.00432817	0.0185523		76.0232	-1.20894	0.432587	0.278072	-4.34757	1.37656e-05	8.64697e-05
B0025.8	B0025.8	1.90655	0	0.94198	0	0	2.24906	2.00102	0	1.9388	1.01185	0.975416	1.97127	1.6688	0.850026	0.853785		0.909364	0.466821	1.38206	1.6108	0.289807	0.771964	NA		0.909364	-0.306679	0.808501	1.76975	-0.173289	0.862424	NA		0.909364	0.48325	1.39789	1.61222	0.299743	0.764373	NA		0.909364	0.253519	1.19211	1.61242	0.157229	0.875064	NA
B0034.1	B0034.1	102.954	112.595	177.092	61.9583	63.9878	73.0946	43.0218	104.768	66.8884	89.0428	91.6891	97.5781	122.657	130.054	143.436		106.659	-0.86807	0.547879	0.268568	-3.23222	0.00122831	0.0129278		106.659	-0.979414	0.507186	0.273592	-3.57983	0.000343813	0.00148065		106.659	-0.496407	0.70887	0.264845	-1.87433	0.0608846	0.132486		106.659	0.0127335	1.00887	0.259187	0.0491284	0.960817	0.973184
B0034.12	B0034.12	0	0	0	0	0	1.12453	0	0	0.969398	0	0	0	0	0.850026	0		0.163553	1.00963	2.01339	5.2679	0.191656	0.848012	NA		0.163553	1.2656	2.40428	5.2679	0.240248	0.810138	NA		0.163553	0	1	5.26765	0	1	NA		0.163553	0.810897	1.7543	5.2679	0.153932	0.877664	NA
B0034.13	B0034.13	0.953277	1.84582	1.88396	0	1.16341	2.24906	1.00051	1.88771	1.9388	2.0237	0.975416	4.92819	0.834399	0.850026	0.853785		1.4736	0.0459653	1.03237	1.19725	0.0383923	0.969375	NA		1.4736	-0.439885	0.737193	1.30917	-0.336003	0.736869	NA		1.4736	0.75694	1.6899	1.12972	0.670025	0.502842	NA		1.4736	-0.886078	0.541083	1.30762	-0.677624	0.49801	NA
B0034.14	B0034.14	0	0	0	0	0	0	1.00051	0	0	0	0	0	0	0	0		0.0555838	1.00963	2.01339	5.2679	0.191656	0.848012	NA		0.0555838	0	1	5.2679	0	1	NA		0.0555838	0	1	5.26765	0	1	NA		0.0555838	0	1	5.2679	0	1	NA
B0034.15	B0034.15	0.953277	0	0.94198	0	0	0	0	0	0	0	0	0	0	0.850026	0		0.152516	-1.82162	0.282903	5.23408	-0.348031	0.727817	NA		0.152516	-1.56564	0.337827	5.23408	-0.299125	0.764845	NA		0.152516	-1.79232	0.288707	5.23382	-0.34245	0.732013	NA		0.152516	-1.05857	0.480108	5.23408	-0.202245	0.839725	NA
B0034.16	B0034.16	0	0	0	0	0	0	0	0	0.969398	0	0	0	0	0	0		0.0538554	1.00963	2.01339	5.2679	0.191656	0.848012	NA		0.0538554	0	1	5.2679	0	1	NA		0.0538554	0	1	5.26765	0	1	NA		0.0538554	0	1	5.2679	0	1	NA
B0034.17	B0034.17	0	1.84582	1.88396	5.95752	0	0	0	0	0	0	0	0	0	0.850026	1.70757		0.911035	-2.80172	0.143417	2.32946	-1.20273	0.22908	NA		0.911035	0.665787	1.58643	2.10857	0.315753	0.75219	NA		0.911035	-2.77244	0.146356	2.32943	-1.19018	0.233976	NA		0.911035	-0.549826	0.683103	2.17458	-0.252842	0.80039	NA
B0034.2	B0034.2	0	0	0	1.1915	0	0	1.00051	0	0	0	0	0	0	0	0		0.121778	1.00963	2.01339	5.2679	0.191656	0.848012	NA		0.121778	1.2656	2.40428	5.2679	0.240248	0.810138	NA		0.121778	0	1	5.26765	0	1	NA		0.121778	0	1	5.2679	0	1	NA
B0034.3	casy-1	2657.74	3328.94	5086.69	4768.4	5193.48	5041.28	2493.27	2155.76	2443.85	2413.26	1981.07	2368.49	4437.33	4915.7	4817.91		3992.65	-0.642692	0.640517	0.179849	-3.57352	0.000352218	0.00537697		3992.65	0.438172	1.35489	0.179503	2.44103	0.0146456	0.0366582		3992.65	-0.711433	0.610713	0.179904	-3.95451	7.66918e-05	0.000990725		3992.65	0.35583	1.27972	0.179401	1.98343	0.0473192	0.0909363
B0034.4	B0034.4	3.81311	10.152	11.3038	1.1915	0	6.74719	3.00152	1.88771	3.87759	5.05925	4.87708	4.92819	5.0064	8.50026	15.3681		6.44281	-1.53212	0.345768	0.770641	-1.98812	0.0467989	NA		6.44281	-1.65087	0.318447	0.813875	-2.02841	0.042518	0.0881045		6.44281	-0.76747	0.587447	0.708268	-1.08359	0.278548	NA		6.44281	0.188976	1.13995	0.651108	0.290238	0.771634	0.834916
B0034.5	B0034.5	11.4393	13.8437	13.1877	3.57451	9.30732	6.74719	14.0071	19.8209	10.6634	15.1778	19.5083	24.6409	12.516	13.6004	19.6371		13.9138	0.211645	1.15801	0.42802	0.494474	0.620971	0.76103		13.9138	-0.96734	0.511448	0.510328	-1.89553	0.0580228	0.113901		13.9138	0.625447	1.54269	0.415442	1.50549	0.132197	NA		13.9138	0.248328	1.18783	0.419971	0.591299	0.55432	0.652652
B0034.6	mir-261	0	0.922911	1.88396	0	0	0	0	0.943854	0	0	1.95083	0.985637	0	0	0.853785		0.592515	-1.42921	0.371333	2.227	-0.641766	0.521025	NA		0.592515	-2.13503	0.227663	2.227	-0.958699	0.33771	NA		0.592515	0.0690316	1.04901	2.06675	0.033401	0.973355	NA		0.592515	-1.62795	0.323548	2.227	-0.731003	0.464778	NA
B0034.7	B0034.7	306.002	229.805	144.123	71.4903	103.544	71.97	135.069	351.114	249.135	157.849	238.977	238.524	424.709	386.762	490.073		211.031	0.113832	1.0821	0.304737	0.373541	0.708746	0.823897		211.031	-1.46083	0.363285	0.316054	-4.62208	3.79903e-06	2.88157e-05		211.031	-0.09745	0.934684	0.305553	-0.318929	0.74978	0.826509		211.031	0.936869	1.91437	0.30244	3.0977	0.0019503	0.00610746
B0034.8	B0034.8	0	0	0	0	0	0	0	0	0.969398	0	0	0	0	0	0		0.0538554	1.00963	2.01339	5.2679	0.191656	0.848012	NA		0.0538554	0	1	5.2679	0	1	NA		0.0538554	0	1	5.26765	0	1	NA		0.0538554	0	1	5.2679	0	1	NA
B0035.1	znf-207	6534.71	6065.37	5148.86	6715.32	6889.74	6701.09	7280.7	6299.28	7005.84	8255.69	9901.45	7105.46	4217.05	4085.22	3818.98		6281.34	0.213898	1.15982	0.127791	1.67381	0.0941679	0.231024		6281.34	0.194187	1.14408	0.127872	1.51861	0.128862	0.217258		6281.34	0.509285	1.42334	0.127726	3.98732	6.68246e-05	0.000897204		6281.34	-0.55018	0.682935	0.127975	-4.29912	1.7148e-05	0.000104324
B0035.10	his-45	155.384	109.826	102.676	95.3204	68.6415	80.9663	176.089	123.645	138.624	192.252	176.55	194.171	74.2615	50.1515	49.5195		105.197	0.252415	1.1912	0.219469	1.15012	0.250094	0.431304		105.197	-0.587047	0.665704	0.231108	-2.54014	0.0110809	0.0289818		105.197	0.614264	1.53078	0.217292	2.8269	0.00470012	0.0196614		105.197	-1.0792	0.473291	0.231667	-4.65842	3.18647e-06	2.42451e-05
B0035.11	leo-1	3338.38	3261.57	2535.81	1965.98	1948.72	1982.55	4073.07	3665.93	3904.73	3973.54	4798.07	4101.24	2044.28	2049.41	1913.33		2854.48	0.349915	1.27449	0.115933	3.01824	0.00254245	0.0217313		2854.48	-0.631477	0.645515	0.116946	-5.39975	6.67338e-08	8.20797e-07		2854.48	0.494767	1.40909	0.115876	4.26981	1.95637e-05	0.000400614		2854.48	-0.604866	0.657532	0.116448	-5.19431	2.05482e-07	2.19672e-06
B0035.12	sart-3	1061.95	1189.63	1014.51	1034.23	957.49	856.893	1183.6	806.051	1273.79	1104.94	779.357	979.724	670.023	661.32	665.953		949.37	-0.00142728	0.999011	0.16589	-0.00860374	0.993135	0.997455		949.37	-0.197513	0.872053	0.166576	-1.18572	0.235732	0.350192		949.37	-0.189722	0.876775	0.166193	-1.14157	0.253632	0.37953		949.37	-0.709561	0.611506	0.166678	-4.25707	2.07125e-05	0.000122716
B0035.13	B0035.13	61.0097	78.4475	60.2867	25.0216	24.4317	37.1096	37.0188	100.049	54.2863	48.5688	62.4266	74.9084	64.2487	90.9527	83.671		54.6063	-0.0594303	0.959643	0.31213	-0.190403	0.848994	0.915428		54.6063	-1.20419	0.434014	0.338694	-3.55538	0.000377433	0.00160376		54.6063	-0.103425	0.93082	0.313006	-0.330426	0.741078	0.819719		54.6063	0.257345	1.19528	0.307013	0.838223	0.401905	0.510811
B0035.14	dnj-1	2094.35	2095.01	2161.84	2633.23	2595.58	2522.33	2532.29	1985.87	2359.51	2320.17	2691.17	2237.4	1994.21	2009.46	1887.72		2265.38	0.114725	1.08277	0.107809	1.06415	0.287259	0.471902		2265.38	0.287347	1.22039	0.10789	2.66334	0.0077369	0.0214748		2265.38	0.190756	1.14136	0.107765	1.77011	0.0767085	0.15724		2265.38	-0.108407	0.927612	0.107831	-1.00534	0.314734	0.421813
B0035.15	B0035.15	1101.03	848.155	743.222	512.347	475.837	536.402	1057.54	1397.85	1203.99	1070.54	1221.22	1307.94	801.023	767.573	687.297		838.417	0.442995	1.35942	0.153718	2.88186	0.0039534	0.0295198		838.417	-0.82027	0.566336	0.157036	-5.22346	1.75608e-07	1.90612e-06		838.417	0.419161	1.33715	0.153785	2.72562	0.0064181	0.0248254		838.417	-0.255038	0.837965	0.154459	-1.65117	0.0987044	0.167748
B0035.16	mttu-1	301.236	252.878	138.471	128.683	131.466	142.816	285.145	353.945	308.268	267.128	312.133	321.318	197.753	181.055	151.12		215.869	0.452292	1.36821	0.218199	2.07284	0.0381868	0.130838		215.869	-0.780911	0.581999	0.226861	-3.44224	0.000576913	0.00231939		215.869	0.379115	1.30054	0.218557	1.73462	0.0828074	0.1663		215.869	-0.385912	0.765295	0.220907	-1.74694	0.0806479	0.141749
B0035.17	mir-59	0	0	0	1.1915	0	0	0	0	0	0	0	0	0	0	0		0.0661947	0	1	5.2679	0	1	NA		0.0661947	1.2656	2.40428	5.2679	0.240248	0.810138	NA		0.0661947	0	1	5.26765	0	1	NA		0.0661947	0	1	5.2679	0	1	NA
B0035.18	B0035.18	693.032	619.273	303.317	147.747	133.793	124.823	434.22	693.733	552.557	526.162	516.971	655.449	367.97	362.111	363.713		385.183	0.057081	1.04036	0.242484	0.235401	0.813898	0.892429		385.183	-1.99165	0.251451	0.252067	-7.90128	2.76053e-15	1.70013e-13		385.183	0.0722664	1.05137	0.242508	0.297996	0.765706	0.83933		385.183	-0.562738	0.677016	0.243323	-2.31272	0.0207379	0.0455665
B0035.19	B0035.19	0	0.922911	0.94198	1.1915	2.32683	1.12453	2.00102	0	0.969398	0	0	0	0.834399	0	0.853785		0.793313	0.651661	1.57098	1.78888	0.364284	0.715646	NA		0.793313	1.30903	2.47774	1.74164	0.751606	0.452288	NA		0.793313	-1.7762	0.291951	1.97503	-0.89933	0.368477	NA		0.793313	-0.147882	0.902574	1.88545	-0.0784334	0.937483	NA
B0035.2	dnj-2	1927.53	1429.59	1177.47	1272.53	1212.28	1303.33	1863.95	2240.71	2029.92	1966.02	2303.93	2108.28	1377.59	1337.94	1156.03		1528.33	0.436137	1.35298	0.155311	2.80815	0.0049827	0.03469		1528.33	-0.259386	0.835444	0.156299	-1.65955	0.0970048	0.173021		1528.33	0.492298	1.40668	0.155291	3.17015	0.00152358	0.00858657		1528.33	-0.227951	0.853847	0.155714	-1.46391	0.143219	0.226773
B0035.20	B0035.20	35.2712	23.9957	16.9556	14.2981	8.1439	12.3699	31.0157	41.5296	29.0819	24.2844	36.0904	42.3824	20.86	17.8505	17.0757		22.7703	0.417623	1.33573	0.34372	1.21501	0.224363	0.402648		22.7703	-1.13052	0.456751	0.409444	-2.76111	0.00576051	0.0167237		22.7703	0.433503	1.35051	0.343987	1.26023	0.207586	0.327464		22.7703	-0.448574	0.732767	0.360317	-1.24494	0.213153	0.311698
B0035.21	B0035.21	15.2524	21.227	16.0137	5.95752	8.1439	11.2453	15.0076	26.4279	22.2961	19.2252	21.4592	17.7415	15.0192	8.50026	11.0992		14.8946	0.281897	1.21579	0.383436	0.735187	0.462226	0.636228		14.8946	-1.04549	0.484481	0.458452	-2.28047	0.0225796	0.0526486		14.8946	0.153417	1.1122	0.388171	0.395231	0.692672	NA		14.8946	-0.60039	0.659575	0.407672	-1.47273	0.140824	0.223796
B0035.22	B0035.22	23.8319	21.227	8.47782	8.34053	9.30732	11.2453	22.0112	50.0243	38.7759	22.2607	27.3116	44.3537	35.0448	26.3508	33.2976		21.97	1.05208	2.07352	0.413341	2.54531	0.0109181	0.0592983		21.97	-0.887253	0.540642	0.485818	-1.82631	0.0678037	0.129298		21.97	0.811851	1.75546	0.417838	1.94298	0.0520183	0.117595		21.97	0.822968	1.76904	0.413807	1.98877	0.0467265	0.0899193
B0035.3	B0035.3	1871.28	1452.66	805.393	733.967	580.544	626.364	1210.61	2248.26	1777.88	1435.82	1473.85	1714.02	869.444	789.674	682.174		1079.51	0.342888	1.26829	0.250254	1.37016	0.170638	0.336718		1079.51	-1.08926	0.470002	0.251962	-4.32311	1.53845e-05	9.81365e-05		1079.51	0.163167	1.11974	0.250374	0.651693	0.514599	0.631268		1079.51	-0.818552	0.567011	0.250985	-3.26136	0.00110878	0.00375963
B0035.4	pfd-4	2489.01	2258.36	969.297	855.501	844.639	763.557	1670.85	3440.35	2474.87	2177.5	2336.12	2965.78	2058.46	1652.45	1994.44		1690.49	0.408246	1.32707	0.277197	1.47277	0.140814	0.299638		1690.49	-1.21439	0.430955	0.27848	-4.36078	1.29603e-05	8.44702e-05		1690.49	0.387758	1.30836	0.277213	1.39877	0.161882	0.272254		1690.49	-0.00285289	0.998024	0.277273	-0.0102891	0.991791	0.994599
B0035.5	gspd-1	865.576	909.068	649.024	853.118	713.173	824.282	1006.51	877.784	951.948	1029.05	1065.15	978.738	617.455	696.171	642.047		822.353	0.226556	1.17004	0.131303	1.72545	0.0844462	0.215463		822.353	-0.0199407	0.986273	0.132429	-0.150577	0.880309	0.920491		822.353	0.342365	1.26783	0.131144	2.6106	0.00903827	0.0321006		822.353	-0.309647	0.806839	0.132015	-2.34554	0.0189997	0.0423661
B0035.6	edg-1	1832.2	1894.74	1530.72	1461.98	1249.51	1123.41	1993.01	982.552	1488.03	1873.95	1207.57	1441.99	536.519	569.517	575.451		1314.75	-0.236416	0.848852	0.21159	-1.11733	0.263853	0.445801		1314.75	-0.455343	0.729337	0.212007	-2.14778	0.0317316	0.0694354		1314.75	-0.217071	0.86031	0.211597	-1.02587	0.304952	0.432597		1314.75	-1.64471	0.319811	0.21299	-7.72201	1.14505e-14	7.81231e-13
B0035.7	his-47	134.412	93.214	94.198	175.151	126.812	156.31	160.081	94.3854	140.563	193.263	158.017	166.573	50.064	45.9014	38.4203		112.434	0.294957	1.22685	0.23202	1.27125	0.203638	0.378284		112.434	0.510283	1.42433	0.232335	2.19632	0.0280691	0.0629112		112.434	0.686575	1.60946	0.229555	2.9909	0.0027816	0.0132875		112.434	-1.25877	0.4179	0.248617	-5.06308	4.12529e-07	4.03926e-06
B0035.8	his-48	381.311	247.34	328.751	534.986	418.829	525.156	480.244	258.616	359.647	534.257	429.183	521.402	166.88	141.954	134.898		338.711	0.197941	1.14706	0.210605	0.939871	0.347284	0.533906		338.711	0.627707	1.54511	0.210108	2.98754	0.0028123	0.00907259		338.711	0.63331	1.55112	0.209529	3.02254	0.00250663	0.0123341		338.711	-1.10891	0.463643	0.215595	-5.1435	2.69668e-07	2.77807e-06
B0035.9	his-46	212.581	174.43	103.618	63.1498	58.1707	69.721	136.069	235.02	199.696	191.24	136.558	192.199	119.319	86.7026	103.308		120.887	0.219224	1.16411	0.258935	0.846638	0.397197	0.580664		120.887	-1.36013	0.389547	0.27593	-4.92926	8.25433e-07	7.51511e-06		120.887	0.0837208	1.05975	0.259759	0.322301	0.747224	0.824359		120.887	-0.665135	0.63063	0.263058	-2.52847	0.0114561	0.027641
B0041.1	B0041.1	3.81311	7.38329	2.82594	1.1915	5.81707	1.12453	3.00152	5.66312	7.75518	4.0474	3.90166	3.94255	5.84079	5.10015	3.41514		4.06627	0.227756	1.17101	0.745761	0.305401	0.760061	NA		4.06627	-0.791277	0.577832	0.854694	-0.925801	0.354549	NA		4.06627	-0.241249	0.846013	0.778977	-0.309699	0.75679	NA		4.06627	0.0318265	1.02231	0.745599	0.0426858	0.965952	NA
B0041.10	B0041.10	0	0	0	0	0	0	1.00051	0	0	0	0	0	0	0	0		0.0555838	1.00963	2.01339	5.2679	0.191656	0.848012	NA		0.0555838	0	1	5.2679	0	1	NA		0.0555838	0	1	5.26765	0	1	NA		0.0555838	0	1	5.2679	0	1	NA
B0041.11	B0041.11	256.432	244.571	306.143	146.555	150.08	123.699	230.117	228.413	238.472	203.382	189.231	274.007	211.937	203.156	222.838		199.616	-0.211579	0.863591	0.172026	-1.22993	0.218724	0.396309		199.616	-0.941973	0.52052	0.180105	-5.23012	1.69396e-07	1.85408e-06		199.616	-0.275795	0.825995	0.172588	-1.598	0.110043	0.204692		199.616	-0.33935	0.790397	0.171619	-1.97734	0.0480032	0.0920738
B0041.12	B0041.12	25.7385	23.9957	30.1433	23.8301	17.4512	20.2416	37.0188	33.9787	29.0819	27.32	43.8937	39.4255	23.3632	17.0005	16.2219		25.8953	0.325036	1.2527	0.310444	1.047	0.295098	0.479934		25.8953	-0.377533	0.769753	0.339751	-1.1112	0.266481	0.3856		25.8953	0.472149	1.38717	0.30788	1.53355	0.125141	0.224895		25.8953	-0.49565	0.709242	0.32751	-1.51339	0.130181	0.210562
B0041.2	ain-2	4893.17	6045.07	7703.51	10662.8	10005.4	9110.96	7186.65	4057.63	6135.32	6545.66	4053.83	5370.74	5229.18	5182.61	4660.81		6847.94	-0.101187	0.932266	0.210239	-0.481294	0.630307	0.768163		6847.94	0.67575	1.59743	0.210155	3.21548	0.00130226	0.00468382		6847.94	-0.223181	0.856674	0.21027	-1.06141	0.288506	0.416448		6847.94	-0.306611	0.808539	0.21024	-1.45838	0.144735	0.228708
B0041.3	lmd-2	1074.34	806.624	686.703	583.837	566.583	574.636	726.369	1061.84	939.346	884.357	843.735	986.623	1001.28	850.876	837.563		763.527	0.0875238	1.06254	0.169332	0.516876	0.605243	0.749301		763.527	-0.573726	0.671879	0.171265	-3.34993	0.000808318	0.00310785		763.527	0.080446	1.05734	0.169388	0.474922	0.634842	0.733489		763.527	0.067157	1.04765	0.169077	0.397197	0.691222	0.769947
B0041.4	rpl-4	17439.2	18317.9	18780.2	32423.2	34673.2	32285.3	17032.6	11733	13939	18448.1	18556.3	14133.1	17334.6	19651.7	21069.7		22003.8	-0.352878	0.78302	0.143844	-2.45321	0.0141588	0.070218		22003.8	0.865733	1.82227	0.143763	6.02193	1.72352e-09	3.20529e-08		22003.8	-0.0928711	0.937655	0.143819	-0.645749	0.518442	0.634397		22003.8	0.0901963	1.06452	0.143784	0.627302	0.530461	0.631383
B0041.5	B0041.5	1561.47	1344.68	1235.88	1158.14	1011.01	1102.04	1685.86	1481.85	1432.77	1519.8	1828.91	1558.29	1023.81	1073.58	1001.49		1260.84	0.151392	1.11064	0.118572	1.27679	0.201677	0.376154		1260.84	-0.340508	0.789763	0.119824	-2.84173	0.00448692	0.0135204		1260.84	0.24466	1.18481	0.118491	2.0648	0.0389423	0.0950121		1260.84	-0.418523	0.74819	0.119114	-3.51363	0.000442021	0.0016995
B0041.6	ptps-1	524.302	395.006	247.741	187.066	182.656	169.804	356.181	672.024	497.301	393.61	452.593	559.842	715.08	549.117	749.623		394.24	0.386892	1.30757	0.249815	1.54872	0.12145	0.27223		394.24	-1.11318	0.462274	0.256041	-4.34765	1.37601e-05	8.90349e-05		394.24	0.268964	1.20494	0.250099	1.07543	0.282182	0.409973		394.24	0.787178	1.7257	0.248912	3.16248	0.00156431	0.00503506
B0041.7	xnp-1	4821.68	5595.61	4858.73	7145.46	6653.57	6525.66	6178.14	3685.75	5059.29	5456.91	3575.88	4335.82	3435.22	3303.2	3274.27		5033.31	-0.0337846	0.976854	0.177718	-0.190102	0.849229	0.915488		5033.31	0.411945	1.33048	0.177671	2.31858	0.0204179	0.0484388		5033.31	-0.192468	0.875108	0.177771	-1.08267	0.278955	0.406877		5033.31	-0.609446	0.655448	0.177832	-3.42709	0.000610087	0.0022417
B0041.8	B0041.8	5024.72	3888.22	2312.56	1547.76	1199.48	1305.58	3771.91	5596.11	4656.02	4500.71	4764.91	5189.38	2283.75	1969.51	1705.01		2944.06	0.321165	1.24934	0.221552	1.44962	0.147165	0.307233		2944.06	-1.46982	0.361027	0.222568	-6.60392	4.00429e-11	1.07528e-09		2944.06	0.364803	1.28771	0.221548	1.64661	0.0996387	0.189833		2944.06	-0.913785	0.530791	0.221893	-4.11813	3.81956e-05	0.000206373
B0041.9	B0041.9	0	1.84582	3.76792	5.95752	4.65366	5.62266	1.00051	1.88771	1.9388	5.05925	0.975416	0.985637	1.6688	3.4001	3.41514		3.0963	-0.216035	0.860928	1.09036	-0.198132	0.842942	NA		3.0963	1.52829	2.88444	0.959403	1.59296	0.11117	NA		3.0963	0.308835	1.23871	1.03326	0.298894	0.765021	NA		3.0963	0.590295	1.50555	0.989753	0.596407	0.550904	NA
B0047.1	bath-20	11.4393	2.76873	7.53584	10.7235	1.16341	1.12453	3.00152	7.55083	7.75518	2.0237	4.87708	8.87074	8.34399	5.10015	6.83028		6.22085	-0.241036	0.846138	0.752881	-0.320151	0.748854	NA		6.22085	-0.752459	0.593591	0.802571	-0.937561	0.34847	0.473397		6.22085	-0.457113	0.728442	0.766307	-0.596515	0.550831	NA		6.22085	-0.0971877	0.934854	0.737262	-0.131823	0.895125	0.925095
B0047.2	btb-3	11.4393	11.9978	6.59386	8.34053	11.6341	21.3661	11.0056	17.9332	17.4492	18.2133	12.6804	21.684	11.6816	17.0005	17.9295		13.3956	0.629431	1.54696	0.475775	1.32296	0.185848	0.356313		13.3956	0.467218	1.38244	0.490899	0.95176	0.341219	0.465492		13.3956	0.80665	1.74915	0.471297	1.71155	0.0869792	NA		13.3956	0.632646	1.55041	0.469766	1.34673	0.178069	0.270275
B0047.3	bath-24	51.477	33.2248	22.6075	25.0216	29.0854	22.4906	27.0137	40.5857	32.9595	30.3555	28.2871	28.5835	35.0448	19.5506	22.1984		28.165	-0.0905739	0.939149	0.329328	-0.275027	0.783296	0.872045		28.165	-0.486113	0.713946	0.346282	-1.40381	0.160376	0.259256		28.165	-0.29812	0.813311	0.334716	-0.890665	0.373109	0.500992		28.165	-0.4802	0.716878	0.333608	-1.43941	0.150034	0.235439
B0047.4	math-1	0.953277	6.46038	2.82594	3.57451	0	2.24906	1.00051	0	2.90819	2.0237	0.975416	1.97127	0	0.850026	6.83028		2.04182	-1.39713	0.379683	1.35379	-1.03201	0.302066	NA		2.04182	-0.820458	0.566262	1.31506	-0.623892	0.532698	NA		2.04182	-1.04805	0.48362	1.31515	-0.79691	0.425503	NA		2.04182	-0.421806	0.74649	1.24256	-0.339465	0.73426	NA
B0047.5	bath-14	23.8319	30.4561	24.4915	29.7876	19.7781	14.6189	11.0056	22.6525	20.3573	16.1896	16.5821	27.5978	21.6944	14.4504	19.6371		20.3646	-0.540852	0.687365	0.379556	-1.42496	0.154169	0.3164		20.3646	-0.30103	0.811673	0.380109	-0.791957	0.428386	0.552272		20.3646	-0.38407	0.766273	0.375375	-1.02316	0.306231	0.433712		20.3646	-0.49822	0.70798	0.371909	-1.33963	0.180366	0.273104
B0198.1	tsp-20	430.881	464.224	503.959	739.925	763.2	795.044	485.246	606.898	535.107	422.953	596.955	485.919	717.583	706.371	706.08		606.583	0.218354	1.16341	0.133345	1.63752	0.101523	0.242703		606.583	0.716083	1.64272	0.132624	5.39933	6.68895e-08	8.22013e-07		606.583	0.106482	1.0766	0.133822	0.795702	0.426205	0.551901		606.583	0.606364	1.52242	0.131779	4.60136	4.19733e-06	3.07659e-05
B0198.2	B0198.2	49.5704	77.5245	94.198	53.6177	67.4781	84.3399	35.0178	34.9226	32.9595	44.5214	52.6725	45.3393	66.7519	73.9522	81.9634		65.9215	-1.10551	0.464739	0.259016	-4.2681	1.97148e-05	0.000698058		65.9215	-0.105651	0.929386	0.243265	-0.434304	0.664068	0.759166		65.9215	-0.634835	0.644015	0.248822	-2.55136	0.0107304	0.0364449		65.9215	0.00786038	1.00546	0.235285	0.0334079	0.973349	0.982257
B0198.3	B0198.3	334.6	459.61	841.188	1044.95	1215.77	1042.44	448.228	304.865	427.504	320.756	255.559	325.26	574.901	687.671	599.357		628.78	-0.470425	0.721752	0.249613	-1.88461	0.0594821	0.173362		628.78	1.01417	2.01974	0.247639	4.09536	4.21511e-05	0.000237168		628.78	-0.859262	0.551234	0.250763	-3.42659	0.000611213	0.00434929		628.78	0.187111	1.13848	0.248073	0.75426	0.450693	0.557074
B0198.4	B0198.4	0	0	0.94198	0	1.16341	0	0	0	0	0	0	0	0	0	0		0.116966	-0.913941	0.530733	5.2679	-0.173492	0.862264	NA		0.116966	0.303821	1.23441	5.2679	0.057674	0.954008	NA		0.116966	-0.884652	0.541618	5.26765	-0.167941	0.86663	NA		0.116966	-1.11267	0.462437	5.2679	-0.211217	0.832718	NA
B0198.5	B0198.5	0.953277	0	0	0	0	0	0	0	0	0	0	0	0	0	0		0.0529598	-0.913941	0.530733	5.2679	-0.173492	0.862264	NA		0.0529598	-0.657962	0.633773	5.2679	-0.1249	0.900603	NA		0.0529598	-0.884666	0.541613	5.26765	-0.167943	0.866628	NA		0.0529598	-1.11267	0.462437	5.2679	-0.211217	0.832718	NA
B0198.7	B0198.7	0	0	0	0	0	0	0	0	0	0	0	0.985637	0	0	1.70757		0.149623	0	1	5.2679	0	1	NA		0.149623	0	1	5.2679	0	1	NA		0.149623	1.03883	2.05457	5.26765	0.19721	0.843663	NA		0.149623	1.71898	3.29205	5.23405	0.328423	0.742591	NA
B0198.9	B0198.9	0	0	0	0	1.16341	0	0	0	0	0	0	0	0	0	0		0.123825	0	1	5.2679	0	1	NA		0.123825	1.2656	2.40428	5.2679	0.240248	0.810138	NA		0.123825	0	1	5.26765	0	1	NA		0.123825	0	1	5.2679	0	1	NA
B0205.1	B0205.1	1676.81	1839.36	1803.89	1678.83	1493.82	1502.37	2327.18	1385.58	1704.2	2020.66	1530.43	1798.79	982.088	924.828	765.845		1534.8	0.0258287	1.01806	0.16916	0.152688	0.878644	0.932714		1534.8	-0.186539	0.878711	0.169582	-1.09999	0.271335	0.390876		1534.8	0.00798013	1.00555	0.169196	0.0471649	0.962382	0.976261		1534.8	-0.993076	0.502405	0.170002	-5.84156	5.17134e-09	8.66034e-08
B0205.10	B0205.10	0	0.922911	0	0	0	1.12453	1.00051	0	0.969398	3.03555	0	2.95691	0.834399	0	0.853785		0.764964	0.953092	1.93602	2.04322	0.466465	0.640882	NA		0.764964	0.303825	1.23441	2.128	0.142775	0.886468	NA		0.764964	2.56613	5.92218	1.86701	1.37446	0.169299	NA		0.764964	0.743483	1.67421	2.04514	0.363537	0.716204	NA
B0205.11	mrpl-9	2860.78	2004.56	1554.27	1663.34	1484.52	1594.59	2378.21	3414.86	2918.86	2887.82	3238.38	3234.86	1988.37	1677.1	1583.77		2123.6	0.440615	1.35718	0.1883	2.33996	0.019286	0.0852678		2123.6	-0.436825	0.738759	0.189035	-2.31082	0.0208428	0.0492953		2123.6	0.544244	1.45826	0.188269	2.89077	0.00384298	0.0170063		2123.6	-0.290306	0.817729	0.188575	-1.53947	0.123689	0.201792
B0205.12	B0205.12	989.502	829.697	392.805	269.28	300.161	256.393	597.303	1393.13	1047.92	911.677	927.621	988.594	788.507	635.819	851.224		648.719	0.458134	1.37376	0.283659	1.61509	0.106292	0.249636		648.719	-1.42147	0.373331	0.287611	-4.94234	7.7192e-07	7.07337e-06		648.719	0.354395	1.27845	0.283772	1.24887	0.211712	0.331925		648.719	0.0408796	1.02874	0.28385	0.144018	0.885486	0.918446
B0205.13	B0205.13	38.1311	33.2248	17.8976	5.95752	3.49024	4.49813	0	13.214	5.81639	10.1185	8.77874	12.8133	37.548	39.1012	49.5195		17.1813	-2.21294	0.215694	0.532596	-4.15501	3.2528e-05	0.00098038		17.1813	-2.68054	0.155983	0.593312	-4.51793	6.24464e-06	4.44685e-05		17.1813	-1.49298	0.355277	0.493681	-3.02418	0.00249305	NA		17.1813	0.499277	1.4135	0.438905	1.13755	0.255308	0.3591
B0205.14	B0205.14	1.90655	2.76873	0	1.1915	0	0	1.00051	0.943854	2.90819	2.0237	0.975416	0.985637	5.84079	5.95018	3.41514		1.77875	0.0502627	1.03545	1.20198	0.0418165	0.966645	NA		1.77875	-1.91117	0.265878	1.55433	-1.22957	0.218858	NA		1.77875	-0.239235	0.847194	1.24407	-0.192301	0.847507	NA		1.77875	1.69842	3.24545	1.06965	1.58783	0.112324	NA
B0205.16	B0205.16	0	0	0	0	0	0	1.00051	0	0	0	0.975416	0	0	0	0		0.109774	1.00963	2.01339	5.2679	0.191656	0.848012	NA		0.109774	0	1	5.2679	0	1	NA		0.109774	1.03882	2.05455	5.26765	0.197208	0.843665	NA		0.109774	0	1	5.2679	0	1	NA
B0205.2	srz-85	0	0	0	1.1915	1.16341	0	0	0	0	1.01185	0	0.985637	0.834399	0.850026	0		0.451761	0	1	2.44475	0	1	NA		0.451761	2.17499	4.51583	2.37073	0.917436	0.358914	NA		0.451761	1.94169	3.84154	2.37169	0.818694	0.412961	NA		0.451761	1.70286	3.25546	2.37336	0.717492	0.473071	NA
B0205.3	rpn-10	3590.99	3482.14	2746.81	2653.48	2431.54	2461.6	3939	3356.34	3539.27	4554.34	5768.61	3637	2048.45	2085.96	1985.05		3015.15	0.141822	1.1033	0.152427	0.930429	0.352149	0.53829		3015.15	-0.379913	0.768484	0.152863	-2.48531	0.0129437	0.0330938		3015.15	0.507523	1.42161	0.152299	3.33241	0.000860973	0.00556881		3015.15	-0.682309	0.623167	0.152758	-4.4666	7.94737e-06	5.33324e-05
B0205.4	B0205.4	312.675	318.404	324.041	370.558	382.763	329.488	338.172	525.727	461.433	297.484	400.896	418.896	561.551	608.618	471.289		377.106	0.473194	1.38818	0.17505	2.70319	0.00686783	0.043286		377.106	0.180768	1.13349	0.177053	1.02098	0.307262	0.430271		377.106	0.226569	1.17005	0.175965	1.28758	0.197891	0.316392		377.106	0.781249	1.71862	0.173755	4.49626	6.91577e-06	4.71159e-05
B0205.5	B0205.5	0.953277	3.69164	0	0	1.16341	0	1.00051	7.55083	0	4.0474	0.975416	4.92819	2.5032	3.4001	3.41514		1.92617	0.882933	1.84412	1.32101	0.668379	0.503892	NA		1.92617	-1.90494	0.267027	1.70229	-1.11905	0.26312	NA		1.92617	1.09059	2.12961	1.31062	0.832121	0.405341	NA		1.92617	0.997086	1.99596	1.30355	0.764898	0.444333	NA
B0205.6	nfs-1	1032.4	1037.35	917.488	894.82	894.666	834.403	1133.58	1257.21	1211.75	1201.07	1559.69	1141.37	976.247	1014.08	929.772		1029.24	0.270291	1.20605	0.123759	2.18401	0.0289613	0.109723		1029.24	-0.18724	0.878285	0.125201	-1.49552	0.134779	0.225629		1029.24	0.385567	1.30637	0.123627	3.11879	0.00181595	0.00971206		1029.24	-0.0328022	0.97752	0.123928	-0.264687	0.79125	0.848906
B0205.7	kin-3	11629	11266.9	10553.9	16420.1	15757.3	15222.8	14426.3	10355	13396.1	14886.3	14298.6	12555	9066.58	8785.86	8530.17		13060.7	0.190688	1.14131	0.11849	1.60932	0.107546	0.251497		13060.7	0.502887	1.41705	0.118481	4.24444	2.19141e-05	0.000133034		13060.7	0.319426	1.24783	0.118475	2.69615	0.00701455	0.0265128		13060.7	-0.342408	0.788724	0.118548	-2.88835	0.00387266	0.0109403
B0205.8	B0205.8	2755.92	2120.85	1365.87	793.542	707.356	681.466	2013.02	3265.73	2907.22	2756.28	2657.03	3329.48	1778.94	1624.4	1538.52		1770.76	0.391089	1.31138	0.216768	1.80418	0.0712031	0.194071		1770.76	-1.51634	0.349572	0.218741	-6.9321	4.1463e-12	1.38635e-10		1770.76	0.485962	1.40052	0.216743	2.24211	0.024954	0.0681525		1770.76	-0.337068	0.791649	0.21702	-1.55316	0.120384	0.19751
B0205.9	B0205.9	1251.65	1343.76	1174.65	1212.95	1263.47	1068.31	1687.86	1016.53	1294.15	1459.09	1289.5	1219.23	682.539	681.721	630.947		1144.77	0.0845558	1.06036	0.155423	0.544038	0.586415	0.734998		1144.77	-0.0890468	0.940144	0.155986	-0.570865	0.568091	0.679168		1144.77	0.0736676	1.05239	0.155468	0.473844	0.635611	0.733775		1144.77	-0.918055	0.529222	0.15663	-5.86128	4.59304e-09	7.79944e-08
B0207.1	B0207.1	0.953277	0	0.94198	0	3.49024	1.12453	0	0.943854	0.969398	2.0237	0	0.985637	1.6688	0.850026	0		1.06373	0.0357144	1.02506	1.79194	0.0199305	0.984099	NA		1.06373	1.29556	2.45473	1.6391	0.790413	0.429287	NA		1.06373	0.66549	1.58611	1.68964	0.393865	0.693681	NA		1.06373	0.424683	1.34228	1.69147	0.251073	0.801758	NA
B0207.10	B0207.10	7.62622	10.152	3.76792	2.38301	3.49024	2.24906	4.00203	8.49468	0.969398	6.0711	2.92625	6.89946	10.8472	11.9004	9.39164		5.47406	-0.672526	0.627407	0.699685	-0.961183	0.33646	NA		5.47406	-1.41002	0.376306	0.798449	-1.76595	0.0774035	0.144029		5.47406	-0.442337	0.735941	0.685671	-0.645117	0.518852	NA		5.47406	0.575458	1.49015	0.6285	0.915605	0.359874	0.469214
B0207.11	B0207.11	0	0	0	0	0	0	1.00051	0.943854	0	1.01185	0	0.985637	1.6688	0.850026	0		0.474002	1.90639	3.7487	2.36708	0.805378	0.420602	NA		0.474002	0	1	2.43936	0	1	NA		0.474002	1.94166	3.84148	2.36613	0.820608	0.41187	NA		0.474002	2.28414	4.87074	2.29355	0.995895	0.319301	NA
B0207.12	avr-14	207.814	278.719	460.628	249.025	326.92	283.382	191.097	261.448	186.124	176.062	202.887	213.883	327.084	364.661	374.812		286.672	-0.568101	0.674504	0.234221	-2.42549	0.0152878	0.0738701		286.672	-0.140332	0.90731	0.233462	-0.601091	0.547779	0.661778		286.672	-0.675865	0.625957	0.234892	-2.87734	0.00401041	0.0175245		286.672	0.171164	1.12597	0.230969	0.741066	0.458653	0.564655
B0207.13	B0207.13	15.2524	19.3811	33.9113	32.1706	40.7195	37.1096	21.0107	28.3156	11.6328	18.2133	18.5329	24.6409	26.7008	31.4509	31.5901		28.5519	-0.167156	0.890597	0.359527	-0.464933	0.641979	0.776612		28.5519	0.682822	1.60528	0.343641	1.98702	0.0469203	0.0955837		28.5519	-0.158846	0.895741	0.360198	-0.440996	0.659216	0.752747		28.5519	0.388146	1.30871	0.340273	1.14069	0.253999	0.35794
B0207.14	B0207.14	0	0	0	0	0	0	0	0	0	0	0	0	0	0	0		0.0578846	0	1	5.2679	0	1	NA		0.0578846	0	1	5.2679	0	1	NA		0.0578846	0	1	5.26765	0	1	NA		0.0578846	0	1	5.2679	0	1	NA
B0207.15	B0207.15	0	0	0	0	0	0	0	0	0	1.01185	0	0.985637	0	0.850026	0		0.158195	0	1	5.2679	0	1	NA		0.158195	0	1	5.2679	0	1	NA		0.158195	1.94524	3.85101	5.23392	0.371659	0.710146	NA		0.158195	0.810897	1.7543	5.2679	0.153932	0.877664	NA
B0207.16	B0207.16	0.953277	0	0	0	0	0	0	0	0	0	0	0	0	0.850026	0		0.100183	-0.913941	0.530733	5.2679	-0.173492	0.862264	NA		0.100183	-0.657962	0.633773	5.2679	-0.1249	0.900603	NA		0.100183	-0.884652	0.541618	5.26765	-0.167941	0.86663	NA		0.100183	-0.150887	0.900697	5.2679	-0.0286426	0.97715	NA
B0207.2	B0207.2	33.3647	33.2248	25.4334	10.7235	15.1244	10.1208	23.0117	42.4734	31.0207	26.3081	42.9183	45.3393	63.4143	49.3015	52.9347		31.8123	0.0721177	1.05126	0.311916	0.231209	0.817153	0.894841		31.8123	-1.35635	0.390569	0.378859	-3.58009	0.000343471	0.00147956		31.8123	0.317769	1.2464	0.307215	1.03435	0.300972	0.429078		31.8123	0.848333	1.80042	0.295008	2.87563	0.00403222	0.0113289
B0207.3	gpa-14	25.7385	24.9186	47.099	51.2347	60.4976	53.9775	33.0168	60.4066	34.8983	35.4148	35.115	34.4973	48.3952	60.3518	45.2506		43.1295	0.396204	1.31604	0.299139	1.32448	0.185344	0.355658		43.1295	0.762036	1.69588	0.297207	2.56399	0.0103477	0.0273716		43.1295	0.103919	1.07469	0.305624	0.340022	0.73384	0.813784		43.1295	0.656044	1.57576	0.291898	2.24751	0.0246071	0.0525402
B0207.4	air-2	3518.55	3262.49	2407.7	3132.47	2888.76	2667.39	4075.07	2957.09	3486.92	4441.01	5625.22	3485.21	1612.06	1631.2	1448.87		3028.39	0.19502	1.14474	0.179067	1.08909	0.276115	0.460143		3028.39	-0.0807756	0.945549	0.179306	-0.45049	0.652357	0.749494		3028.39	0.560525	1.47481	0.178956	3.1322	0.001735	0.00942812		3028.39	-0.96961	0.510644	0.179578	-5.39939	6.68694e-08	8.10154e-07
B0207.5	B0207.5	32.4114	52.6059	48.041	35.7451	38.3927	28.1133	53.0269	45.305	43.6229	23.2726	34.1396	33.5117	47.5608	32.301	23.906		35.2567	0.0914334	1.06543	0.29329	0.311751	0.75523	0.853646		35.2567	-0.382637	0.767034	0.308871	-1.23882	0.215411	0.326574		35.2567	-0.548898	0.683542	0.307296	-1.78622	0.0740637	0.153135		35.2567	-0.358357	0.780052	0.297868	-1.20307	0.228948	0.329467
B0207.6	B0207.6	1137.26	884.149	544.464	507.581	404.868	481.3	1019.52	1511.11	1168.12	1092.8	1257.31	1201.49	539.856	547.416	399.572		768.912	0.527764	1.44169	0.21961	2.40319	0.0162529	0.0765825		768.912	-0.880463	0.543193	0.222293	-3.96082	7.46919e-05	0.000387905		768.912	0.4691	1.38425	0.219688	2.1353	0.0327364	0.0833824		768.912	-0.787088	0.579512	0.221058	-3.56056	0.000370069	0.0014595
B0207.7	B0207.7	0.953277	0.922911	2.82594	1.1915	1.16341	1.12453	1.00051	2.83156	0.969398	0	0.975416	1.97127	0	1.70005	0.853785		1.19844	0.0380466	1.02672	1.35521	0.0280743	0.977603	NA		1.19844	-0.434111	0.74015	1.45311	-0.298746	0.765134	NA		1.19844	-0.666109	0.630204	1.45398	-0.458128	0.646861	NA		1.19844	-0.885026	0.541478	1.45249	-0.609315	0.542316	NA
B0207.9	B0207.9	0	0	0	0	0	0	0	0	0.969398	0	0	0	0	0	0		0.0538554	1.00963	2.01339	5.2679	0.191656	0.848012	NA		0.0538554	0	1	5.2679	0	1	NA		0.0538554	0	1	5.26765	0	1	NA		0.0538554	0	1	5.2679	0	1	NA
B0212.1	otpl-1	61.0097	70.1413	132.819	84.5969	90.7463	79.8418	43.0218	47.1927	43.6229	60.711	41.9429	57.167	117.65	120.704	138.313		80.4382	-0.97936	0.507205	0.269548	-3.63335	0.000279769	0.00456009		80.4382	-0.0490367	0.966581	0.258882	-0.189417	0.849766	0.898614		80.4382	-0.724831	0.605068	0.265467	-2.73039	0.00632586	0.0245428		80.4382	0.512844	1.42686	0.24947	2.05573	0.0398083	0.0787458
B0212.2	sre-5	1.90655	0.922911	0.94198	1.1915	0	0	2.00102	0	0	0	1.95083	1.97127	0.834399	0	3.41514		1.13151	-0.939302	0.521485	1.6586	-0.566323	0.571174	NA		1.13151	-1.59497	0.331029	1.76329	-0.904542	0.365708	NA		1.13151	0.0661028	1.04688	1.49829	0.0441188	0.96481	NA		1.13151	0.172052	1.12666	1.46177	0.117701	0.906305	NA
B0212.3	B0212.3	844.603	856.462	828	657.711	543.315	531.904	970.493	693.733	879.244	982.506	791.062	816.108	435.556	466.664	367.128		688.538	0.00785866	1.00546	0.148886	0.052783	0.957905	0.978843		688.538	-0.545746	0.685037	0.150882	-3.61704	0.000297993	0.00130784		688.538	0.0340017	1.02385	0.148891	0.228366	0.819362	0.87783		688.538	-0.994462	0.501923	0.150862	-6.59186	4.34339e-11	1.28175e-09
B0212.4	nstp-6	81.9818	88.5995	100.792	72.6818	73.2951	70.8455	62.0315	73.6206	109.542	90.0547	83.8858	85.7504	128.497	98.603	113.553		85.7606	-0.14563	0.903984	0.216282	-0.673336	0.500734	0.669519		85.7606	-0.324031	0.798835	0.222872	-1.45389	0.145977	0.240765		85.7606	-0.0638125	0.956732	0.215598	-0.295979	0.767246	0.840297		85.7606	0.328213	1.25546	0.209064	1.56991	0.116435	0.192041
B0212.5	osm-9	43.8507	55.3747	120.573	82.2138	84.9293	85.4644	23.0117	23.5963	33.9289	27.32	26.3362	29.5691	61.7455	63.7519	79.402		62.5367	-1.44819	0.366481	0.325549	-4.44845	8.64924e-06	0.000382588		62.5367	0.200838	1.14937	0.300743	0.667805	0.504258	0.622196		62.5367	-1.4011	0.378641	0.325074	-4.3101	1.63181e-05	0.000354265		62.5367	-0.101483	0.932074	0.299145	-0.339245	0.734425	0.804781
B0212.7	B0212.7	0	0	0	0	0	1.12453	0	0	0	0	0	0	0	0	0		0.062474	0	1	5.2679	0	1	NA		0.062474	1.2656	2.40428	5.2679	0.240248	0.810138	NA		0.062474	0	1	5.26765	0	1	NA		0.062474	0	1	5.2679	0	1	NA
B0212.9	B0212.9	0	0	0	0	0	1.12453	0	0	0	0	0	0	0	0	0		0.119665	0	1	5.2679	0	1	NA		0.119665	1.2656	2.40428	5.2679	0.240248	0.810138	NA		0.119665	0	1	5.26765	0	1	NA		0.119665	0	1	5.2679	0	1	NA
B0213.10	cyp-34A5	0.953277	1.84582	0.94198	8.34053	1.16341	1.12453	1.00051	0	0.969398	0	0	0	1.6688	2.55008	0		1.25921	-0.941316	0.520758	1.66441	-0.565554	0.571697	NA		1.25921	1.49628	2.82114	1.40116	1.06788	0.285573	NA		1.25921	-2.77722	0.145873	1.76707	-1.57165	0.116032	NA		1.25921	0.172143	1.12673	1.46695	0.117347	0.906585	NA
B0213.11	cyp-34A6	20.0188	18.4582	15.0717	21.4471	17.4512	19.117	16.0081	10.3824	10.6634	13.1541	22.4346	18.7271	19.1912	20.4006	23.906		19.6824	-0.535346	0.689993	0.383922	-1.39441	0.163193	0.32703		19.6824	0.114929	1.08292	0.366493	0.313593	0.753831	0.829414		19.6824	0.0233886	1.01634	0.361379	0.0647202	0.948397	NA		19.6824	0.245508	1.18551	0.347043	0.707427	0.479301	0.584026
B0213.12	cyp-34A7	0.953277	1.84582	0.94198	0	0	1.12453	1.00051	0	0.969398	0	0	0	0.834399	2.55008	1.70757		0.662642	-0.938315	0.521842	1.86205	-0.503916	0.61432	NA		0.662642	-1.58804	0.332624	1.95477	-0.81239	0.416568	NA		0.662642	-2.77656	0.145939	1.95476	-1.42041	0.155488	NA		0.662642	0.441443	1.35796	1.66724	0.264775	0.791183	NA
B0213.14	cyp-34A8	7.62622	10.152	7.53584	8.34053	1.16341	12.3699	6.00305	7.55083	3.87759	8.0948	4.87708	3.94255	5.84079	8.50026	12.8068		9.22062	-0.53754	0.688945	0.612163	-0.878098	0.37989	NA		9.22062	-0.206578	0.86659	0.607356	-0.340127	0.733761	0.813705		9.22062	-0.586398	0.666004	0.617402	-0.949784	0.342222	NA		9.22062	0.0980414	1.07032	0.569123	0.172268	0.863227	0.901529
B0213.15	cyp-34A9	18.1123	7.38329	18.8396	34.5536	44.2098	40.4831	21.0107	16.0455	18.4186	24.2844	22.4346	15.7702	58.4079	68.8521	70.0104		32.2892	0.325169	1.25281	0.355743	0.914054	0.360689	0.54614		32.2892	1.43237	2.6989	0.332105	4.31302	1.61042e-05	0.000102065		32.2892	0.498253	1.4125	0.350845	1.42015	0.155563	0.264743		32.2892	2.15744	4.46122	0.314635	6.85695	7.03474e-12	2.5334e-10
B0213.16	cyp-34A10	0	0	0	0	0	0	0	0	0	1.01185	0	0	0.834399	0	0		0.15976	0	1	5.2679	0	1	NA		0.15976	0	1	5.2679	0	1	NA		0.15976	1.03883	2.05457	5.26765	0.19721	0.843663	NA		0.15976	0.810897	1.7543	5.2679	0.153932	0.877664	NA
B0213.17	nlp-34	183.029	114.441	112.096	51.2347	59.3342	71.97	119.06	151.017	90.154	186.18	160.944	226.697	282.027	289.009	362.005		158.171	-0.18385	0.880351	0.233415	-0.787653	0.4309	0.61021		158.171	-1.16346	0.446439	0.249158	-4.66959	3.01802e-06	2.35431e-05		158.171	0.487073	1.4016	0.22906	2.1264	0.0334702	0.0847478		158.171	1.18838	2.27897	0.225303	5.27459	1.3305e-07	1.49499e-06
B0213.18	B0213.18	1.90655	0	0	1.1915	0	1.12453	1.00051	0.943854	0.969398	1.01185	1.95083	0.985637	1.6688	0.850026	2.56136		1.42154	0.627663	1.54506	1.54243	0.406931	0.684059	NA		1.42154	0.298016	1.22945	1.65119	0.180485	0.856771	NA		1.42154	1.06986	2.09924	1.4854	0.720251	0.471371	NA		1.42154	1.42959	2.6937	1.42551	1.00286	0.315928	NA
B0213.2	nlp-27	14.2992	20.304	12.2457	4.76602	3.49024	3.3736	16.0081	42.4734	28.1125	9.10665	24.3854	22.6697	30.8728	16.1505	34.1514		17.4925	0.888033	1.85065	0.46684	1.90222	0.0571424	0.168966		17.4925	-2.01487	0.247437	0.634532	-3.17536	0.00149651	0.0052797		17.4925	0.262953	1.19993	0.480939	0.546749	0.584551	NA		17.4925	0.791957	1.73142	0.465121	1.70269	0.0886257	0.153345
B0213.20	21ur-12305	1.90655	1.84582	0	0	2.32683	1.12453	1.00051	0	0	0	0	1.97127	0.834399	0.850026	1.70757		1.0424	-1.84701	0.277968	1.75697	-1.05125	0.293145	NA		1.0424	-0.115428	0.923108	1.5478	-0.0745757	0.940552	NA		1.0424	-0.924625	0.526817	1.6559	-0.558384	0.576582	NA		1.0424	-0.148057	0.902465	1.48966	-0.0993897	0.920829	NA
B0213.22	B0213.22	1.90655	0	0.94198	0	1.16341	0	0	0.943854	0.969398	0	1.95083	0.985637	0.834399	2.55008	1.70757		1.23881	-0.549176	0.68341	1.59998	-0.343239	0.731418	NA		1.23881	-1.18284	0.440483	1.70365	-0.6943	0.487494	NA		1.23881	0.0646941	1.04586	1.4872	0.0435005	0.965303	NA		1.23881	0.845765	1.79722	1.36424	0.619953	0.535289	NA
B0213.24	B0213.24	0	0	2.82594	1.1915	3.49024	4.49813	1.00051	0	2.90819	1.01185	0.975416	2.95691	5.0064	5.95018	6.83028		2.90323	0.464413	1.37976	1.27446	0.3644	0.715559	NA		2.90323	1.71116	3.27423	1.16886	1.46395	0.143207	NA		2.90323	0.812096	1.75576	1.23345	0.658395	0.510284	NA		2.90323	2.65667	6.30576	1.09721	2.42129	0.0154656	NA
B0213.25	B0213.25	0	0	0.94198	0	0	0	0	0	0	0	0	0	0	0	0		0.0523322	-0.913941	0.530733	5.2679	-0.173492	0.862264	NA		0.0523322	-0.657962	0.633773	5.2679	-0.1249	0.900603	NA		0.0523322	-0.884666	0.541613	5.26765	-0.167943	0.866628	NA		0.0523322	-1.11267	0.462437	5.2679	-0.211217	0.832718	NA
B0213.3	nlp-28	5.71966	1.84582	2.82594	0	0	1.12453	1.00051	6.60698	3.87759	3.03555	1.95083	7.8851	2.5032	7.65023	5.9765		3.00341	0.155887	1.11411	0.949106	0.164246	0.869537	NA		3.00341	-3.05632	0.120214	1.45375	-2.10237	0.0355207	NA		3.00341	0.312584	1.24193	0.941275	0.332085	0.739825	NA		3.00341	0.63634	1.55438	0.913834	0.69634	0.486216	NA
B0213.4	nlp-29	340.32	178.122	182.744	60.7668	79.1122	86.589	151.077	235.02	165.767	305.579	340.42	391.298	715.914	540.616	811.096		292.819	-0.344331	0.787673	0.2519	-1.36693	0.171646	0.338013		292.819	-1.62879	0.32336	0.265407	-6.13694	8.41282e-10	1.69433e-08		292.819	0.565493	1.47989	0.248557	2.2751	0.0228997	0.0640465		292.819	1.56055	2.94966	0.24626	6.33699	2.34304e-10	5.85691e-09
B0213.5	nlp-30	158.244	83.9849	80.0683	29.7876	41.8829	35.985	87.0442	101.936	65.919	156.837	139.484	209.941	277.855	233.757	309.07		121.909	-0.337233	0.791558	0.276509	-1.21961	0.222614	0.400973		121.909	-1.58034	0.334403	0.301555	-5.24065	1.60015e-07	1.77079e-06		121.909	0.652288	1.57166	0.269451	2.4208	0.0154864	0.0482104		121.909	1.34921	2.54773	0.265849	5.07511	3.87267e-07	3.82274e-06
B0213.6	nlp-31	1640.59	1326.22	730.034	368.175	367.639	304.748	1074.55	2605.98	1834.1	1755.56	1861.09	2241.34	1924.12	1515.6	2053.35		1269.41	0.577093	1.49184	0.279736	2.06299	0.0391136	0.132848		1269.41	-1.82907	0.281446	0.283206	-6.45843	1.05798e-10	2.59129e-09		1269.41	0.664136	1.58462	0.27971	2.37437	0.017579	0.0528421		1269.41	0.571336	1.4859	0.279654	2.04301	0.0410516	0.0808466
B0213.7	str-83	0	0	0.94198	0	0	2.24906	0	0	0.969398	2.0237	0	0.985637	1.6688	0	0.853785		0.71273	0.047843	1.03372	2.15399	0.0222113	0.982279	NA		0.71273	1.17887	2.26399	2.07556	0.567975	0.570052	NA		0.71273	1.5681	2.96513	1.9852	0.789894	0.42959	NA		0.71273	1.3249	2.50516	1.98705	0.66677	0.504919	NA
B0213.8	str-82	0	0	0	0	0	0	1.00051	0	0	0	0	0	0	0.850026	0		0.39076	1.00963	2.0134	3.63614	0.277666	0.781269	NA		0.39076	0	1	3.63614	0	1	NA		0.39076	0	1	3.63606	0	1	NA		0.39076	0.810903	1.75431	3.63614	0.223012	0.823526	NA
B0218.1	faah-1	385.124	323.942	431.427	256.174	255.951	298.001	367.186	391.699	295.666	323.792	417.478	408.054	416.365	506.615	450.799		361.741	-0.112712	0.924848	0.161281	-0.698857	0.484642	0.656114		361.741	-0.492759	0.710665	0.164539	-2.99478	0.00274645	0.00889054		361.741	0.011664	1.00812	0.1609	0.0724918	0.942211	0.963371		361.741	0.268616	1.20465	0.159301	1.68622	0.0917535	0.157969
B0218.2	faah-2	183.982	185.505	214.771	181.109	152.407	155.185	201.102	159.511	157.042	193.263	189.231	181.357	216.944	174.255	194.663		189.74	-0.175632	0.88538	0.158982	-1.10473	0.269277	0.45189		189.74	-0.258344	0.836047	0.1622	-1.59275	0.111217	0.193478		189.74	-0.0513469	0.965035	0.158196	-0.324579	0.7455	0.823092		189.74	0.00424152	1.00294	0.156119	0.0271686	0.978325	0.985456
B0218.3	pmk-1	1985.68	2175.3	1822.73	2732.12	2482.73	2470.6	2502.27	2087.8	2454.51	2709.73	2673.62	2351.73	1861.54	1864.96	1773.31		2248.82	0.235304	1.17715	0.107355	2.19183	0.0283918	0.108308		2248.82	0.360964	1.28428	0.107481	3.35839	0.000783973	0.00302932		2248.82	0.370303	1.29262	0.10726	3.45238	0.000555658	0.00405446		2248.82	-0.121697	0.919106	0.107509	-1.13197	0.257648	0.361762
B0218.5	B0218.5	4.76638	5.53747	14.1297	14.2981	9.30732	7.87172	10.0051	6.60698	9.69398	2.0237	7.80333	5.91382	5.84079	6.8002	11.953		8.15058	0.104576	1.07518	0.599656	0.174393	0.861556	NA		8.15058	0.362216	1.2854	0.599582	0.604113	0.545768	0.660424		8.15058	-0.628285	0.646945	0.642754	-0.97749	0.328327	NA		8.15058	0.00831409	1.00578	0.595239	0.0139677	0.988856	0.992593
B0218.6	clec-51	21.9254	17.5353	35.7952	15.4896	9.30732	14.6189	13.0066	28.3156	20.3573	15.1778	21.4592	16.7558	11.6816	10.2003	11.953		18.1344	-0.281978	0.822463	0.391879	-0.719553	0.4718	0.644827		18.1344	-0.932357	0.524002	0.426765	-2.18471	0.0289105	0.0643641		18.1344	-0.493077	0.710508	0.399362	-1.23466	0.216956	NA		18.1344	-1.1524	0.449875	0.415859	-2.77114	0.00558603	0.015043
B0218.7	B0218.7	0	0	0.94198	0	0	0	0	1.88771	0	1.01185	1.95083	0.985637	0	0.850026	0.853785		0.471212	0.91725	1.88851	2.51586	0.364588	0.715419	NA		0.471212	-0.657969	0.63377	2.58012	-0.255015	0.798712	NA		0.471212	1.96861	3.9139	2.40652	0.818032	0.413339	NA		0.471212	0.751554	1.68361	2.51107	0.299297	0.764714	NA
B0218.8	clec-52	2.85983	5.53747	12.2457	14.2981	25.5951	39.3586	10.0051	15.1017	3.87759	6.0711	1.95083	3.94255	4.172	4.25013	9.39164		10.5471	0.491188	1.4056	0.677362	0.725148	0.468361	NA		10.5471	1.94249	3.84369	0.647764	2.99876	0.00271077	0.00879291		10.5471	-0.79241	0.577379	0.749766	-1.05688	0.290568	NA		10.5471	-0.214789	0.861672	0.698675	-0.307423	0.758521	0.824277
B0222.1	B0222.1	26.6918	19.3811	37.6792	30.9791	23.2683	43.8567	23.0117	25.4841	29.0819	34.4029	38.0412	29.5691	46.7264	35.7011	32.4438		33.4825	-0.108524	0.927536	0.32547	-0.333439	0.738803	0.843399		33.4825	0.232304	1.17471	0.323177	0.718812	0.472257	0.593174		33.4825	0.285992	1.21925	0.316396	0.903906	0.366045	0.493865		33.4825	0.457872	1.37351	0.308566	1.48387	0.137844	0.220172
B0222.10	B0222.10	0	0.922911	3.76792	0	3.49024	3.3736	3.00152	0.943854	0	2.0237	3.90166	0	3.3376	0.850026	0		1.59791	-0.259941	0.835122	1.54491	-0.168257	0.866381	NA		1.59791	0.554787	1.46895	1.49036	0.372251	0.709706	NA		1.59791	0.337903	1.26392	1.48954	0.22685	0.82054	NA		1.59791	-0.159041	0.89562	1.51328	-0.105097	0.916299	NA
B0222.11	B0222.11	7.62622	4.61456	3.76792	3.57451	4.65366	5.62266	7.00356	8.49468	2.90819	7.08295	4.87708	6.89946	4.172	10.2003	11.0992		6.25053	0.204667	1.15242	0.679892	0.301028	0.763393	NA		6.25053	-0.203233	0.868602	0.725494	-0.280131	0.779377	0.847917		6.25053	0.237061	1.17859	0.679715	0.348765	0.727266	NA		6.25053	0.670034	1.59111	0.64945	1.03169	0.302216	0.408713
B0222.14	B0222.14	7.62622	5.53747	4.7099	5.95752	2.32683	4.49813	5.00254	16.0455	3.87759	4.0474	4.87708	3.94255	14.1848	14.4504	17.9295		7.03081	0.489189	1.40366	0.619007	0.79028	0.429364	NA		7.03081	-0.484845	0.714574	0.701172	-0.691477	0.489266	0.609047		7.03081	-0.472055	0.720937	0.680237	-0.693956	0.48771	NA		7.03081	1.38232	2.60687	0.583413	2.36937	0.0178183	0.040116
B0222.15	B0222.15	17.159	9.22911	8.47782	7.14903	4.65366	6.74719	12.0061	28.3156	14.541	7.08295	16.5821	10.842	26.7008	35.7011	37.5666		14.4162	0.660863	1.58103	0.464292	1.42338	0.154627	0.316864		14.4162	-0.908325	0.532803	0.555831	-1.63417	0.102222	0.180715		14.4162	-0.00917457	0.993661	0.48833	-0.0187876	0.985011	NA		14.4162	1.52147	2.87084	0.443244	3.43259	0.000597851	0.00220297
B0222.2	pitr-2	0.953277	0	0	0	0	0	0	0	0.969398	1.01185	0	0.985637	0	0	0		0.217787	0.0478427	1.03372	4.26444	0.011219	0.991049	NA		0.217787	-0.657965	0.633771	4.26444	-0.154291	0.87738	NA		0.217787	0.983019	1.9766	4.2226	0.232799	0.815917	NA		0.217787	-1.11268	0.462436	4.26444	-0.260919	0.794155	NA
B0222.3	pitr-3	75.3089	93.214	113.038	88.1714	94.2366	104.581	90.0457	66.0698	81.4294	68.8058	108.271	86.7361	158.536	147.054	151.974		101.119	-0.247203	0.842528	0.207878	-1.18918	0.23437	0.414232		101.119	0.028109	1.01967	0.207605	0.135397	0.892298	0.928287		101.119	-0.0928787	0.93765	0.206168	-0.450499	0.65235	0.747018		101.119	0.70025	1.62479	0.196325	3.56678	0.000361391	0.00143192
B0222.4	spl-2	63.8696	52.6059	92.314	156.087	167.532	142.816	63.032	33.0349	39.7453	68.8058	44.8691	62.0952	140.179	91.8028	126.36		88.5922	-0.623263	0.649201	0.282093	-2.20942	0.0271453	0.105212		88.5922	1.1599	2.23441	0.264265	4.38913	1.13805e-05	7.53881e-05		88.5922	-0.248881	0.841549	0.27641	-0.900406	0.367904	0.495754		88.5922	0.779988	1.71712	0.263769	2.95709	0.00310557	0.0090655
B0222.5	B0222.5	10.486	13.8437	17.8976	29.7876	19.7781	29.2378	11.0056	2.83156	3.87759	8.0948	6.82791	8.87074	16.688	7.65023	12.8068		15.695	-1.26731	0.415433	0.519906	-2.43758	0.014786	0.0720163		15.695	0.899592	1.86554	0.431027	2.08709	0.0368798	0.0783451		15.695	-0.828799	0.562998	0.491801	-1.68523	0.0919435	NA		15.695	-0.184198	0.880138	0.450021	-0.40931	0.682312	0.76217
B0222.6	col-144	6858.83	6946.75	10517.2	5825.27	8753.53	8517.2	3442.75	4194.49	3317.28	4748.61	4242.08	4750.77	4385.6	5869.43	6678.31		6882.9	-1.15076	0.450389	0.204448	-5.62861	1.81667e-08	3.80046e-06		6882.9	-0.0746403	0.949579	0.204252	-0.365432	0.714789	0.799656		6882.9	-0.823776	0.564961	0.204363	-4.03094	5.5555e-05	0.000799508		6882.9	-0.522452	0.696188	0.204251	-2.5579	0.0105308	0.0257409
B0222.7	col-145	179.216	181.814	310.853	308.6	458.385	410.454	96.0488	115.15	104.695	136.6	105.345	134.047	332.925	458.164	485.804		278.004	-1.08817	0.470359	0.240246	-4.52938	5.91563e-06	0.000288956		278.004	0.809696	1.75284	0.231023	3.50483	0.000456898	0.00189562		278.004	-0.837794	0.559498	0.238346	-3.51504	0.00043969	0.00343538		278.004	0.926309	1.90041	0.229567	4.03502	5.45966e-05	0.000280373
B0222.8	col-10	6886.47	6971.67	10566.2	5919.4	8898.96	8624.04	3458.76	4213.36	3331.82	4768.85	4257.69	4768.51	4480.72	5984.18	6814.91		6947.21	-1.15027	0.45054	0.204375	-5.62825	1.82043e-08	3.80046e-06		6947.21	-0.0591751	0.959813	0.204177	-0.289822	0.771952	0.842265		6947.21	-0.824172	0.564806	0.204291	-4.0343	5.47644e-05	0.00079262		6947.21	-0.499241	0.707479	0.204174	-2.44517	0.0144786	0.0336257
B0222.9	gad-3	160.151	208.578	223.249	203.747	202.434	185.548	266.135	106.655	172.553	206.417	129.73	170.515	165.211	152.155	133.191		189.249	-0.119965	0.92021	0.253771	-0.472729	0.636406	0.772284		189.249	-0.000942245	0.999347	0.254497	-0.00370238	0.997046	0.998044		189.249	-0.22518	0.855488	0.254483	-0.884855	0.376235	0.504131		189.249	-0.39387	0.761085	0.25416	-1.54969	0.121215	0.198651
B0228.1	B0228.1	74.3556	40.6081	39.5631	47.6602	55.8439	59.6002	52.0264	102.88	84.3376	48.5688	63.402	76.8797	105.969	77.3523	91.355		66.4049	0.63364	1.55147	0.300141	2.11114	0.0347604	0.123473		66.4049	0.0800771	1.05707	0.31054	0.257864	0.796512	0.860719		66.4049	0.291335	1.22377	0.30424	0.957582	0.338274	0.465913		66.4049	0.831337	1.77933	0.296743	2.80154	0.00508597	0.0138477
B0228.10	B0228.10	2.85983	7.38329	21.6655	15.4896	16.2878	15.7434	6.00305	3.77542	4.84699	2.0237	3.90166	4.92819	10.8472	17.0005	16.2219		10.6597	-1.12986	0.456959	0.614544	-1.83854	0.0659833	NA		10.6597	0.574181	1.48883	0.538427	1.0664	0.286241	0.407111		10.6597	-1.55223	0.340983	0.654668	-2.37102	0.0177393	NA		10.6597	0.464558	1.37989	0.528296	0.879351	0.379211	0.488431
B0228.4	cpna-2	1490.93	2369.11	5284.51	4236.99	4652.5	4405.92	1766.9	1153.39	1492.87	1293.14	956.883	1353.28	3192.41	3871.02	3379.28		3011.29	-1.05116	0.482579	0.301313	-3.48861	0.000485546	0.00670872		3011.29	0.539942	1.45391	0.300854	1.7947	0.0727013	0.136837		3011.29	-1.34362	0.394031	0.301502	-4.45641	8.33443e-06	0.0002299		3011.29	0.191507	1.14196	0.300832	0.63659	0.524392	0.625736
B0228.5	trx-1	76.2622	75.6787	73.4744	110.81	90.7463	115.827	97.0493	144.41	107.603	89.0428	108.271	101.521	99.2935	101.153	99.8929		97.1608	0.632727	1.55049	0.196156	3.22563	0.00125694	0.0131746		97.1608	0.494034	1.40838	0.20074	2.46106	0.0138526	0.03505		97.1608	0.407416	1.32631	0.198979	2.04754	0.0406055	0.098112		97.1608	0.413992	1.33237	0.19636	2.10833	0.0350026	0.0707123
B0228.6	B0228.6	3153.44	2407.88	1765.27	3924.82	3580.99	4034.82	3364.71	5475.3	4377.8	3495.94	4577.63	4270.77	4252.1	3758.81	3430.51		3708.79	0.851345	1.80418	0.200858	4.23855	2.24971e-05	0.000761058		3708.79	0.655539	1.5752	0.200998	3.26143	0.00110854	0.00407591		3708.79	0.752681	1.68492	0.200893	3.74668	0.000179193	0.00180192		3708.79	0.643087	1.56167	0.20086	3.20167	0.00136636	0.00450016
B0228.7	B0228.7	1392.74	857.385	671.631	652.945	596.832	720.825	1315.67	1798.99	1519.05	1530.93	1765.5	1785.97	1053.01	946.078	852.932		1056.24	0.665531	1.58615	0.207981	3.19995	0.0013745	0.0140304		1056.24	-0.567996	0.674553	0.209869	-2.70643	0.00680103	0.0192289		1056.24	0.798817	1.73967	0.207908	3.84216	0.000121956	0.00139328		1056.24	-0.0347036	0.976232	0.208417	-0.166511	0.867755	0.904713
B0228.8	B0228.8	0	0	0	0	0	0	0	0	0	0	0	0	0.834399	1.70005	2.56136		0.400175	0	1	3.11441	0	1	NA		0.400175	0	1	3.11441	0	1	NA		0.400175	0	1	3.11436	0	1	NA		0.400175	3.29685	9.82771	2.94239	1.12047	0.262515	NA
B0228.9	B0228.9	0	0	0.94198	0	0	1.12453	0	0	0	0	0	0.985637	0	0.850026	0.853785		0.322105	-0.913949	0.53073	3.01905	-0.302728	0.762097	NA		0.322105	0.303824	1.23441	3.01905	0.100636	0.91984	NA		0.322105	0.0770778	1.05488	3.019	0.0255309	0.979631	NA		0.322105	0.752575	1.6848	2.96013	0.254237	0.799312	NA
B0238.1	cest-35.1	224.02	213.192	227.017	221.62	219.885	201.291	163.083	169.894	154.134	156.837	199.96	198.113	393.836	379.961	402.133		245.784	-0.447127	0.733502	0.14952	-2.99043	0.00278589	0.0232127		245.784	-0.0476555	0.967507	0.148201	-0.321561	0.747786	0.824417		245.784	-0.258545	0.83593	0.148061	-1.74621	0.0807752	0.163291		245.784	0.824167	1.77051	0.140374	5.87121	4.3262e-09	7.43771e-08
B0238.10	natc-2	3535.7	2911.78	2787.32	3570.94	3401.82	3816.66	3629.84	3955.69	3963.87	3704.38	4899.51	4162.35	5480.33	4966.7	5304.57		3780.38	0.322732	1.2507	0.122271	2.63949	0.00830309	0.04941		3780.38	0.224536	1.1684	0.12247	1.8334	0.0667436	0.127817		3780.38	0.467272	1.38249	0.122216	3.82334	0.000131657	0.0014723		3780.38	0.77039	1.70573	0.122012	6.31405	2.71819e-10	6.64803e-09
B0238.11	B0238.11	12767.2	9300.18	6676.75	7570.82	6890.91	7815.5	11694.9	14018.1	13569.6	13092.3	15309.2	14545	6685.21	6420.24	5519.72		9303.5	0.450642	1.36665	0.179461	2.51109	0.012036	0.0632078		9303.5	-0.367686	0.775024	0.179619	-2.04703	0.0406551	0.0848962		9303.5	0.579286	1.49411	0.179451	3.2281	0.00124617	0.00737222		9303.5	-0.626001	0.64797	0.179581	-3.4859	0.000490484	0.00185355
B0238.12	B0238.12	22.8786	35.0706	76.3003	34.5536	52.3537	46.1058	20.0102	23.5963	15.5104	11.1304	13.6558	28.5835	37.548	51.0015	56.3498		36.1641	-1.1826	0.440557	0.416092	-2.84215	0.00448099	0.0322563		36.1641	-0.0127601	0.991194	0.396359	-0.0321933	0.974318	0.983576		36.1641	-1.32959	0.397881	0.42139	-3.15525	0.00160361	0.00891883		36.1641	0.109618	1.07894	0.388741	0.281983	0.777957	0.839707
B0238.13	B0238.13	21.9254	25.8415	20.7236	20.2556	17.4512	17.9925	16.0081	17.9332	14.541	11.1304	14.6312	16.7558	32.5416	39.1012	45.2506		23.0391	-0.498285	0.707948	0.341228	-1.46027	0.144216	0.303612		23.0391	-0.300094	0.8122	0.343713	-0.873093	0.382612	0.507502		23.0391	-0.686753	0.621251	0.351031	-1.95639	0.0504193	0.114693		23.0391	0.769661	1.70487	0.29976	2.56759	0.0102408	0.0251696
B0238.14	srt-66	0	0	0	0	0	0	0	0	0	0	0	0	0	0	0		0.0591905	0	1	5.2679	0	1	NA		0.0591905	0	1	5.2679	0	1	NA		0.0591905	0	1	5.26765	0	1	NA		0.0591905	0	1	5.2679	0	1	NA
B0238.15	B0238.15	81.0285	55.3747	37.6792	23.8301	23.2683	17.9925	60.0305	81.1714	69.7966	70.8295	74.1316	71.9515	34.2104	29.7509	25.6136		46.3216	0.279325	1.21363	0.27641	1.01055	0.312233	0.497172		46.3216	-1.4207	0.373531	0.322432	-4.4062	1.05201e-05	7.04294e-05		46.3216	0.318227	1.2468	0.276293	1.15178	0.249413	0.375227		46.3216	-0.957156	0.515071	0.294074	-3.25481	0.00113468	0.0038375
B0238.18	B0238.18	3.81311	2.76873	3.76792	3.57451	3.49024	1.12453	0	1.88771	1.9388	2.0237	0.975416	1.97127	4.172	6.8002	5.12271		3.16708	-1.41733	0.374406	0.994655	-1.42494	0.154174	NA		3.16708	-0.345324	0.787131	0.873993	-0.395111	0.692761	NA		3.16708	-1.06034	0.479519	0.939839	-1.12821	0.25923	NA		3.16708	0.637644	1.55579	0.759491	0.839567	0.401151	NA
B0238.3	srt-68	0.953277	0.922911	0	3.57451	0	0	0	1.88771	0.969398	1.01185	0	0.985637	0	1.70005	0.853785		1.12612	0.618626	1.53541	1.83508	0.33711	0.736034	NA		1.12612	0.910927	1.88025	1.83033	0.497685	0.618706	NA		1.12612	0.0829426	1.05918	1.92444	0.0430995	0.965622	NA		1.12612	0.439808	1.35642	1.83246	0.24001	0.810323	NA
B0238.5	srt-67	0	0	0.94198	0	0	0	1.00051	0	0	0	0	0.985637	0	0	0		0.219864	0.0478427	1.03372	4.24474	0.0112711	0.991007	NA		0.219864	-0.657965	0.633771	4.24474	-0.155007	0.876816	NA		0.219864	0.0770669	1.05487	4.24461	0.0181564	0.985514	NA		0.219864	-1.11268	0.462436	4.24474	-0.26213	0.793221	NA
B0238.6	srt-70	2.85983	0	0	0	1.16341	0	0	1.88771	1.9388	1.01185	1.95083	1.97127	1.6688	5.10015	4.26893		1.49969	0.444063	1.36043	1.46642	0.302822	0.762026	NA		1.49969	-1.18563	0.439632	1.73606	-0.682944	0.494642	NA		1.49969	0.802276	1.74385	1.42952	0.561221	0.574647	NA		1.49969	1.95987	3.89028	1.33642	1.46651	0.142509	NA
B0238.7	cest-30	0	0	0	0	0	0	2.00102	0	0.969398	0	0	0	0.834399	0.850026	0		0.316487	2.51488	5.71551	3.28812	0.764839	0.444367	NA		0.316487	0	1	3.39367	0	1	NA		0.316487	0	1	3.3936	0	1	NA		0.316487	1.70156	3.25252	3.34274	0.50903	0.610731	NA
B0238.8	srt-69	8.57949	7.38329	15.0717	4.76602	13.961	1.12453	12.0061	12.2701	6.78578	7.08295	4.87708	8.87074	14.1848	17.0005	17.9295		9.76685	0.00197174	1.00137	0.569001	0.00346527	0.997235	NA		9.76685	-0.649679	0.637422	0.617048	-1.05288	0.292395	0.414039		9.76685	-0.575316	0.671139	0.598129	-0.961859	0.336121	NA		9.76685	0.662631	1.58297	0.542732	1.22092	0.222117	0.32168
B0238.9	B0238.9	851.276	933.986	796.915	974.651	902.81	851.271	972.494	643.708	904.448	938.997	649.627	747.113	438.894	427.563	394.449		791.197	-0.0351747	0.975914	0.161569	-0.217707	0.827658	0.903068		791.197	0.0794649	1.05663	0.161824	0.491057	0.623386	0.725546		791.197	-0.144993	0.904384	0.161819	-0.896019	0.370243	0.498047		791.197	-1.03413	0.488312	0.163398	-6.32888	2.4695e-10	6.12797e-09
B0240.1	rhr-2	74.3556	95.0599	50.8669	94.1289	73.2951	75.3436	99.0503	164.231	98.8786	108.268	146.312	125.176	125.994	124.104	113.553		97.5368	0.71792	1.64481	0.245592	2.92322	0.00346428	0.0269641		97.5368	0.138528	1.10078	0.254338	0.544661	0.585987	0.693853		97.5368	0.785435	1.72361	0.245293	3.20202	0.00136467	0.00791675		97.5368	0.722502	1.65004	0.244094	2.95994	0.00307703	0.00898991
B0240.2	spe-42	14.2992	10.152	5.65188	26.2131	22.1049	26.9888	16.0081	15.1017	19.388	11.1304	9.75416	16.7558	7.50959	4.25013	3.41514		15.959	0.747459	1.67883	0.429239	1.74136	0.0816206	0.211045		15.959	1.32463	2.50469	0.41983	3.15516	0.00160412	0.00561277		15.959	0.323987	1.25179	0.446093	0.726276	0.46767	NA		15.959	-0.983051	0.505909	0.509857	-1.92809	0.0538439	0.101322
B0240.3	daf-11	144.898	169.816	232.669	187.066	238.5	239.525	118.06	100.049	114.389	111.304	120.952	132.075	202.759	260.958	242.475		179.089	-0.720003	0.607096	0.192097	-3.74812	0.000178165	0.0032872		179.089	0.281552	1.2155	0.185599	1.51699	0.12927	0.217816		179.089	-0.587103	0.665678	0.190996	-3.07391	0.00211272	0.0108158		179.089	0.367204	1.28985	0.18252	2.01186	0.0442351	0.0860701
B0240.4	npp-22	2731.14	3005	2256.98	2950.17	2502.51	2364.89	3525.79	2068.93	2963.45	3061.86	2436.59	2531.12	1334.2	1306.49	1121.02		2435.73	0.0984197	1.0706	0.178027	0.552836	0.580376	0.730442		2435.73	-0.0321159	0.977985	0.178231	-0.180193	0.857001	0.903633		2435.73	0.00650881	1.00452	0.178085	0.0365489	0.970845	0.982013		2435.73	-1.08736	0.470621	0.178677	-6.08563	1.16035e-09	2.39075e-08
B0240.5	B0240.5	0	0	0	0	1.16341	0	0	0	0	0	0	0	0	0.850026	0		0.111858	0	1	5.2679	0	1	NA		0.111858	1.2656	2.40428	5.2679	0.240248	0.810138	NA		0.111858	0	1	5.26765	0	1	NA		0.111858	0.810897	1.7543	5.2679	0.153932	0.877664	NA
B0240.6	B0240.6	0	0	0	0	0	0	0	1.88771	0	0	0	0	0.834399	0.850026	1.70757		0.351201	1.87321	3.66346	3.23807	0.578495	0.56293	NA		0.351201	0	1	3.28758	0	1	NA		0.351201	0	1	3.28752	0	1	NA		0.351201	2.7098	6.54229	3.15277	0.859498	0.390066	NA
B0240.7	B0240.7	0	0	0	0	0	1.12453	2.00102	0	0	0	0	0	0	0	0		0.173642	1.94551	3.85175	5.23219	0.371836	0.710015	NA		0.173642	1.2656	2.40428	5.2679	0.240248	0.810138	NA		0.173642	0	1	5.26765	0	1	NA		0.173642	0	1	5.2679	0	1	NA
B0244.10	B0244.10	22.8786	37.8394	80.0683	50.0432	33.739	50.6039	39.0198	33.9787	31.0207	30.3555	22.4346	32.526	31.7072	47.6014	29.0287		40.8352	-0.437496	0.738415	0.36447	-1.20036	0.229999	0.409395		40.8352	-0.0671528	0.95452	0.362433	-0.185284	0.853007	0.900752		40.8352	-0.723471	0.605639	0.370922	-1.95046	0.0511207	0.115957		40.8352	-0.378371	0.769305	0.360077	-1.05081	0.293347	0.399724
B0244.15	B0244.15	0	4.61456	3.76792	3.57451	5.81707	5.62266	4.00203	0.943854	2.90819	5.05925	1.95083	2.95691	5.84079	3.4001	3.41514		3.97809	-0.111875	0.925385	0.882969	-0.126703	0.899175	NA		3.97809	0.836203	1.78535	0.825161	1.01338	0.310878	NA		3.97809	0.237194	1.1787	0.853294	0.277975	0.781032	NA		3.97809	0.588791	1.50399	0.812047	0.72507	0.468409	NA
B0244.16	B0244.16	10.486	1.84582	11.3038	5.95752	4.65366	6.74719	9.00457	10.3824	13.5716	10.1185	7.80333	15.7702	18.3568	16.1505	20.4908		9.62039	0.485408	1.39998	0.550345	0.882006	0.377774	NA		9.62039	-0.438983	0.737654	0.616822	-0.711685	0.47666	0.597292		9.62039	0.516152	1.43014	0.550285	0.937973	0.348258	NA		9.62039	1.22318	2.33461	0.523084	2.3384	0.0193664	0.0430032
B0244.17	B0244.17	3.81311	8.3062	25.4334	34.5536	30.2488	48.3549	15.0076	5.66312	12.6022	11.1304	4.87708	12.8133	13.3504	14.4504	17.9295		18.7137	-0.179778	0.882839	0.528155	-0.340388	0.733564	0.84006		18.7137	1.5922	3.0151	0.489195	3.25474	0.00113494	0.0041595		18.7137	-0.384151	0.76623	0.538199	-0.713773	0.475368	NA		18.7137	0.283496	1.21714	0.506475	0.559742	0.575655	0.671447
B0244.2	ida-1	1309.8	1462.81	2307.85	1889.73	2262.84	2279.43	1012.51	913.65	898.632	1005.78	871.047	1130.53	1976.69	2353.72	2418.77		1825.79	-0.846879	0.555986	0.183239	-4.62172	3.80567e-06	0.000208627		1825.79	0.34036	1.26607	0.182308	1.86695	0.0619082	0.12021		1825.79	-0.756495	0.591933	0.183157	-4.1303	3.62288e-05	0.000607469		1825.79	0.409733	1.32844	0.181994	2.25136	0.0243627	0.0521113
B0244.4	B0244.4	5.71966	6.46038	6.59386	3.57451	6.98049	1.12453	8.00406	16.0455	4.84699	5.05925	0.975416	9.85637	9.17839	5.95018	12.8068		6.72304	0.625546	1.54279	0.670105	0.933504	0.35056	NA		6.72304	-0.691556	0.619186	0.766042	-0.902764	0.366651	0.491354		6.72304	-0.242576	0.845235	0.713589	-0.339938	0.733903	NA		6.72304	0.572723	1.48733	0.665075	0.86114	0.389161	0.498455
B0244.5	B0244.5	8.57949	5.53747	20.7236	7.14903	6.98049	6.74719	6.00305	10.3824	8.72458	4.0474	4.87708	11.8276	6.67519	6.8002	8.53785		8.89703	-0.467661	0.723136	0.564508	-0.82844	0.407421	NA		8.89703	-0.737938	0.599596	0.594985	-1.24026	0.214878	0.325941		8.89703	-0.744163	0.597014	0.58105	-1.28072	0.200292	NA		8.89703	-0.661545	0.632201	0.564268	-1.1724	0.241038	0.342894
B0244.6	B0244.6	15.2524	10.152	19.7816	15.4896	13.961	17.9925	15.0076	20.7648	29.0819	15.1778	13.6558	16.7558	14.1848	25.5008	16.2219		17.0032	0.524654	1.43859	0.404113	1.29829	0.194189	0.366858		17.0032	0.0732664	1.0521	0.427786	0.171269	0.864013	0.908705		17.0032	0.0141922	1.00989	0.421219	0.0336933	0.973122	NA		17.0032	0.308014	1.238	0.404592	0.761295	0.446481	0.553243
B0244.7	B0244.7	0.953277	2.76873	12.2457	15.4896	19.7781	12.3699	5.00254	2.83156	11.6328	5.05925	0.975416	0.985637	5.84079	5.95018	8.53785		7.52333	0.284371	1.21788	0.733716	0.387576	0.69833	NA		7.52333	1.57613	2.98168	0.696496	2.26294	0.0236396	0.0546553		7.52333	-1.1971	0.436151	0.854706	-1.4006	0.161334	NA		7.52333	0.347731	1.27256	0.721852	0.48172	0.630005	0.718086
B0244.8	egg-1	335.554	311.944	193.106	182.3	153.571	149.563	198.101	139.69	164.798	164.932	168.747	123.205	71.7583	67.152	75.9869		186.166	-0.7429	0.597537	0.210843	-3.52347	0.000425932	0.00612956		186.166	-0.792705	0.577261	0.213084	-3.72015	0.000199106	0.000923187		186.166	-0.879695	0.543482	0.212003	-4.14945	3.33276e-05	0.000574574		186.166	-1.96781	0.255641	0.220511	-8.92385	4.50336e-19	5.84337e-17
B0244.9	B0244.9	0.953277	4.61456	0	0	1.16341	1.12453	1.00051	0	0.969398	1.01185	0.975416	0	0	0	0		0.829847	-1.51445	0.350029	1.81703	-0.833478	0.404575	NA		0.829847	-1.2777	0.412454	1.82084	-0.701707	0.482862	NA		0.829847	-1.49319	0.355225	1.81859	-0.821072	0.411605	NA		0.829847	-3.5807	0.0835799	1.91194	-1.87281	0.0610952	NA
B0250.1	rpl-2	16452.6	17000.9	17071.5	28818.9	31273.8	27591.5	16637.4	12344.7	13784.8	17366.4	18877.2	13617.6	16643.8	20387	21309.6		20802.2	-0.240522	0.846439	0.146892	-1.63741	0.101545	0.242703		20802.2	0.795315	1.73546	0.146825	5.41677	6.06863e-08	7.59047e-07		20802.2	-0.0190825	0.98686	0.146872	-0.129926	0.896625	0.931589		20802.2	0.207491	1.15468	0.146834	1.4131	0.157625	0.245021
B0250.10	srbc-78	0	0	0	0	0	0	0	1.88771	0	0	0	0	0	0	0		0.162063	1.86788	3.64996	5.23753	0.356634	0.721366	NA		0.162063	0	1	5.2679	0	1	NA		0.162063	0	1	5.26765	0	1	NA		0.162063	0	1	5.2679	0	1	NA
B0250.11	B0250.11	0.953277	1.84582	3.76792	1.1915	2.32683	2.24906	3.00152	0.943854	0.969398	0	0.975416	0.985637	0.834399	1.70005	2.56136		1.58118	-0.429059	0.742746	1.16831	-0.367249	0.713434	NA		1.58118	-0.18413	0.88018	1.16967	-0.15742	0.874914	NA		1.58118	-1.73299	0.300828	1.41213	-1.22722	0.219741	NA		1.58118	-0.36963	0.773981	1.13891	-0.324549	0.745523	NA
B0250.12	B0250.12	542.415	502.987	630.184	925.799	944.693	977.218	646.328	745.644	685.364	584.849	629.143	664.32	676.698	578.867	575.451		694.879	0.31049	1.24013	0.117461	2.64335	0.00820907	0.0490343		694.879	0.765369	1.6998	0.116926	6.54573	5.92058e-11	1.53412e-09		694.879	0.165042	1.1212	0.117992	1.39876	0.161886	0.272254		694.879	0.128268	1.09298	0.117413	1.09245	0.274635	0.379999
B0250.14	B0250.14	0	0	0	0	2.32683	0	0	0	0	0	0	0	0	0	0		0.186459	0	1	5.2679	0	1	NA		0.186459	2.16606	4.48795	5.23459	0.413796	0.679023	NA		0.186459	0	1	5.26765	0	1	NA		0.186459	0	1	5.2679	0	1	NA
B0250.15	B0250.15	0	0	0.94198	1.1915	0	2.24906	1.00051	1.88771	0	1.01185	0.975416	0	0	0	0		0.57222	1.52027	2.86845	2.22246	0.684051	0.493943	NA		0.57222	1.7739	3.41977	2.22271	0.798078	0.424826	NA		0.57222	0.975233	1.96596	2.29791	0.424401	0.671274	NA		0.57222	-1.11268	0.462434	2.37254	-0.468984	0.639081	NA
B0250.17	B0250.17	0.953277	0	0	0	0	0	0	0	0	0	0	0	0	0	0		0.0529598	-0.913941	0.530733	5.2679	-0.173492	0.862264	NA		0.0529598	-0.657962	0.633773	5.2679	-0.1249	0.900603	NA		0.0529598	-0.884666	0.541613	5.26765	-0.167943	0.866628	NA		0.0529598	-1.11267	0.462437	5.2679	-0.211217	0.832718	NA
B0250.18	B0250.18	102.954	92.2911	53.6928	71.4903	69.8049	71.97	132.067	234.076	148.318	84.9954	128.755	168.544	165.211	99.453	124.653		108.904	1.04812	2.06783	0.291602	3.59434	0.00032522	0.00506785		108.904	-0.223054	0.85675	0.30401	-0.733705	0.463129	0.584603		108.904	0.619498	1.53634	0.294105	2.10638	0.0351711	0.0881187		108.904	0.645486	1.56427	0.292621	2.20587	0.0273928	0.0576155
B0250.19	B0250.19	0	0.922911	0	2.38301	0	1.12453	1.00051	0.943854	0.969398	1.01185	0.975416	0.985637	0	0	0		0.630364	1.52879	2.88544	1.96999	0.776039	0.437726	NA		0.630364	1.79126	3.46118	1.9692	0.909639	0.363013	NA		0.630364	1.55798	2.94441	1.96998	0.79086	0.429026	NA		0.630364	-1.11268	0.462433	2.13884	-0.520226	0.602906	NA
B0250.2	calf-1	279.31	179.045	177.092	158.47	178.002	181.05	182.092	302.033	214.237	188.204	244.829	229.653	381.32	345.96	396.156		232.463	0.137639	1.1001	0.207733	0.662574	0.507603	0.674602		232.463	-0.295325	0.814889	0.211951	-1.39336	0.16351	0.263121		232.463	0.0613783	1.04346	0.20826	0.29472	0.768208	0.841023		232.463	0.822555	1.76853	0.204519	4.0219	5.77303e-05	0.00029389
B0250.3	B0250.3	1473.77	1426.82	1295.22	2533.14	2703.78	2779.84	1538.78	1084.49	1365.88	1650.33	1842.56	1191.64	1575.35	2022.21	2140.44		1892.57	-0.0730236	0.950644	0.1736	-0.420644	0.674015	0.800186		1892.57	0.934099	1.9107	0.173006	5.39922	6.69294e-08	8.22013e-07		1892.57	0.158962	1.11648	0.173408	0.916693	0.359303	0.48701		1892.57	0.451564	1.36752	0.173023	2.60985	0.00905814	0.0226494
B0250.4	B0250.4	544.321	745.712	1217.98	1587.08	1652.05	1412.41	965.49	529.502	748.375	739.662	537.454	728.386	636.647	641.769	543.007		901.476	-0.161146	0.894315	0.246612	-0.653438	0.513474	0.679488		901.476	0.891111	1.8546	0.245836	3.62482	0.00028916	0.00127434		901.476	-0.322684	0.799581	0.24687	-1.3071	0.191178	0.30793		901.476	-0.461482	0.72624	0.246745	-1.87028	0.0614447	0.113341
B0250.5	B0250.5	1713.04	1446.2	976.833	1531.08	1431	1333.69	1757.89	1685.72	1739.1	1965.01	2224.92	1779.08	1182.34	1150.08	1115.04		1502.13	0.325462	1.25307	0.161217	2.01879	0.0435093	0.141872		1502.13	0.0546095	1.03858	0.161749	0.337619	0.73565	0.815109		1502.13	0.529284	1.44321	0.161079	3.28587	0.00101667	0.00630343		1502.13	-0.262677	0.83354	0.161591	-1.62557	0.104041	0.175131
B0250.6	srbc-79	0	0.922911	1.88396	0	0	0	0	0	1.9388	0	0.975416	0	0.834399	0	0		0.422078	-0.534232	0.690526	2.71338	-0.196888	0.843915	NA		0.422078	-2.13431	0.227776	2.77633	-0.768754	0.442039	NA		0.422078	-1.39926	0.379124	2.77628	-0.504005	0.614258	NA		0.422078	-1.62723	0.323709	2.77633	-0.58611	0.557802	NA
B0250.7	B0250.7	32.4114	30.4561	34.8532	51.2347	23.2683	31.4869	29.0147	29.2595	20.3573	34.4029	21.4592	28.5835	30.8728	48.4515	35.0052		32.7708	-0.313374	0.804758	0.324452	-0.965856	0.334116	0.519002		32.7708	0.114417	1.08254	0.319974	0.357582	0.720656	0.803313		32.7708	-0.212202	0.863219	0.322519	-0.657952	0.510569	0.62811		32.7708	0.226187	1.16974	0.308177	0.733952	0.462978	0.568702
B0250.8	B0250.8	1.90655	5.53747	1.88396	0	1.16341	1.12453	4.00203	1.88771	1.9388	3.03555	0.975416	2.95691	5.0064	0.850026	6.83028		3.1571	-0.262977	0.833367	0.997934	-0.263521	0.792149	NA		3.1571	-2.01664	0.247133	1.33425	-1.51144	0.130676	NA		3.1571	-0.428805	0.742877	1.01656	-0.421821	0.673156	NA		3.1571	0.439428	1.35607	0.935666	0.469643	0.63861	NA
B0250.9	dhcr-7	115.347	131.053	197.816	125.108	158.224	122.574	93.0472	99.1046	96.9398	87.0191	96.5662	90.6786	146.854	155.555	192.102		130.683	-0.619497	0.650898	0.209135	-2.96219	0.0030546	0.0246699		130.683	-0.130321	0.913628	0.206626	-0.630713	0.528228	0.644244		130.683	-0.695444	0.617519	0.210394	-3.30544	0.000948259	0.00598335		130.683	0.154471	1.11301	0.20077	0.769391	0.441661	0.548864
B0252.1	B0252.1	40.9909	42.4539	73.4744	52.4262	68.6415	73.0946	35.0178	46.2488	45.5617	36.4266	40.9675	41.3968	71.7583	125.804	70.8642		59.1685	-0.305642	0.809082	0.297044	-1.02895	0.303504	0.488479		59.1685	0.308677	1.23857	0.291091	1.06042	0.288955	0.410157		59.1685	-0.400986	0.75734	0.299449	-1.33908	0.180545	0.295029		59.1685	0.774444	1.71053	0.280847	2.75753	0.005824	0.01559
B0252.10	21ur-15020	0	0	0	1.1915	0	0	0	0	0	0	0.975416	0	0.834399	0	0		0.224625	0	1	4.21604	0	1	NA		0.224625	1.26561	2.40429	4.21604	0.30019	0.764033	NA		0.224625	1.03886	2.0546	4.21591	0.246413	0.805362	NA		0.224625	0.810901	1.75431	4.21604	0.192337	0.847478	NA
B0252.2	asm-1	1111.52	1072.42	709.311	664.86	570.073	655.602	1297.66	1381.8	1133.23	1357.9	1391.92	1355.25	623.296	575.467	502.88		893.34	0.398137	1.31781	0.156405	2.54555	0.0109106	0.0592866		893.34	-0.613909	0.653424	0.158774	-3.86656	0.000110383	0.00054953		893.34	0.50471	1.41884	0.156316	3.22877	0.00124322	0.00736145		893.34	-0.765685	0.588174	0.15801	-4.8458	1.26104e-06	1.07138e-05
B0252.3	B0252.3	122.973	146.743	128.109	107.235	101.217	82.0908	144.073	147.241	143.471	137.612	172.649	139.961	151.026	150.455	136.606		127.421	0.127748	1.09259	0.165021	0.774132	0.438853	0.617213		127.421	-0.455708	0.729152	0.175785	-2.59242	0.00953038	0.0255436		127.421	0.178591	1.13178	0.164811	1.08362	0.278535	0.406381		127.421	0.138697	1.10091	0.163104	0.850364	0.395123	0.504151
B0252.4	cyn-10	3367.93	2468.79	1410.14	936.523	859.763	823.157	2445.24	4156.73	3137.94	2950.56	2882.35	3477.33	1750.57	1430.59	1451.43		1959.12	0.426625	1.34409	0.240749	1.77207	0.0763825	0.202857		1959.12	-1.46813	0.36145	0.242228	-6.06095	1.35316e-09	2.58438e-08		1959.12	0.361483	1.28475	0.240778	1.50131	0.133275	0.235512		1959.12	-0.645498	0.639272	0.241107	-2.67722	0.00742355	0.0191655
B0252.5	B0252.5	4.76638	0.922911	1.88396	2.38301	2.32683	1.12453	1.00051	2.83156	1.9388	2.0237	0.975416	2.95691	0.834399	2.55008	1.70757		2.31913	-0.377345	0.769853	1.00649	-0.374911	0.707727	NA		2.31913	-0.376361	0.770378	1.03939	-0.362099	0.717278	NA		2.31913	-0.341959	0.788969	1.00576	-0.34	0.733857	NA		2.31913	-0.569172	0.674004	1.00568	-0.565958	0.571422	NA
B0252.8	B0252.8	18.1123	20.304	10.3618	4.76602	9.30732	4.49813	9.00457	27.3718	12.6022	18.2133	20.4837	15.7702	30.0384	21.2506	51.2271		18.195	0.0109136	1.00759	0.47365	0.0230415	0.981617	0.991913		18.195	-1.39498	0.380249	0.55972	-2.49229	0.0126921	0.0325794		18.195	0.158722	1.1163	0.470212	0.337554	0.7357	NA		18.195	1.07049	2.10015	0.447686	2.39116	0.016795	0.0381354
B0252.9	21ur-12059	56.2433	61.8351	65.9386	83.4053	68.6415	70.8455	72.0366	48.1365	63.9802	68.8058	62.4266	55.1957	54.2359	41.6513	41.8355		59.788	-0.00155983	0.998919	0.222371	-0.00701453	0.994403	0.997874		59.788	0.275318	1.21026	0.222016	1.24009	0.214944	0.325982		59.788	0.0179498	1.01252	0.222538	0.0806596	0.935713	0.959167		59.788	-0.417449	0.748747	0.22635	-1.84426	0.0651447	0.118824
B0261.1	B0261.1	1501.41	1807.98	1854.76	1981.47	1941.74	1807.12	1973	1118.47	1551.04	1675.62	1026.14	1351.31	1214.89	1269.09	1325.07		1584.85	-0.153819	0.898868	0.200191	-0.768362	0.442272	0.619693		1584.85	0.150037	1.1096	0.200156	0.749602	0.453495	0.575648		1584.85	-0.349647	0.784776	0.200375	-1.74497	0.0809907	0.1635		1584.85	-0.439135	0.737577	0.200258	-2.19284	0.0283187	0.059157
B0261.2	let-363	2029.53	3518.14	5948.6	5998.04	5368	5050.27	3870.97	1651.74	2874.26	2768.42	1421.18	2242.32	2707.63	2813.58	2345.35		3619.35	-0.453283	0.730379	0.317468	-1.42781	0.153347	0.31547		3619.35	0.513951	1.42796	0.317321	1.61966	0.105306	0.185069		3619.35	-0.837883	0.559464	0.317594	-2.63822	0.00833424	0.030269		3619.35	-0.547365	0.684269	0.317442	-1.7243	0.0846535	0.14775
B0261.4	mrpl-47	1350.79	1067.81	739.454	942.48	905.137	1001.96	1270.65	1512.05	1305.78	1564.32	1843.54	1478.46	1017.97	1060.83	916.965		1129.97	0.372667	1.29474	0.174138	2.14007	0.0323488	0.117829		1129.97	-0.148176	0.902391	0.175147	-0.846005	0.39755	0.522531		1129.97	0.629803	1.54735	0.17393	3.62101	0.00029345	0.00255461		1129.97	-0.0760382	0.948659	0.174406	-0.435985	0.662848	0.745227
B0261.5	B0261.5	51.477	114.441	225.133	170.385	164.041	147.314	144.073	51.912	100.817	93.0902	44.8691	85.7504	96.7903	100.303	86.2323		116.369	-0.399145	0.758307	0.392581	-1.01672	0.309287	0.493977		116.369	0.300613	1.23167	0.390276	0.770257	0.441147	0.564655		116.369	-0.806469	0.57178	0.395635	-2.03841	0.0415085	0.0995807		116.369	-0.465014	0.724464	0.391815	-1.18682	0.235299	0.336469
B0261.6	B0261.6	0.953277	1.84582	1.88396	2.38301	2.32683	1.12453	4.00203	4.71927	2.90819	6.0711	1.95083	3.94255	0.834399	0.850026	3.41514		2.52822	1.3106	2.48045	0.986927	1.32796	0.18419	NA		2.52822	0.30786	1.23787	1.10265	0.2792	0.780092	NA		2.52822	1.34613	2.5423	0.986541	1.3645	0.172411	NA		2.52822	0.115862	1.08362	1.07084	0.108197	0.91384	NA
B0261.7	B0261.7	3833.13	2993.92	1940.48	2244.8	1859.14	2264.81	3811.94	3676.31	4060.81	3814.68	4830.26	4082.51	1488.57	1371.94	1206.4		2705.26	0.397548	1.31727	0.189737	2.09526	0.0361481	0.12644		2705.26	-0.461135	0.726415	0.190274	-2.42353	0.0153703	0.0381729		2705.26	0.537737	1.45169	0.189703	2.83463	0.00458782	0.0193315		2705.26	-1.10819	0.463875	0.190415	-5.81987	5.88946e-09	9.73824e-08
B0261.8	B0261.8	2383.19	1800.6	1185.01	1415.51	1414.71	1457.39	1929.98	3624.4	2906.25	2380.88	2805.3	3020.98	2841.13	2471.02	2297.54		2045.06	0.656271	1.576	0.226404	2.89866	0.00374756	0.0284629		2045.06	-0.32439	0.798636	0.227119	-1.42828	0.153211	0.249859		2045.06	0.612326	1.52872	0.226432	2.70424	0.0068461	0.02603		2045.06	0.503275	1.41743	0.226388	2.22307	0.0262114	0.0554846
B0261.9	B0261.9	3.81311	5.53747	0.94198	0	1.16341	1.12453	1.00051	5.66312	3.87759	3.03555	0.975416	0	2.5032	0	0.853785		1.86814	0.038914	1.02734	1.06624	0.0364964	0.970887	NA		1.86814	-2.15725	0.224184	1.41082	-1.52907	0.126247	NA		1.86814	-1.37145	0.386502	1.20984	-1.13358	0.256972	NA		1.86814	-1.61148	0.327263	1.21164	-1.32999	0.183521	NA
B0272.1	tbb-4	1251.65	1257.01	1281.09	1808.7	1901.02	1846.48	1448.74	1574.35	1508.38	1533.96	2142.01	1599.69	1799.8	1940.61	1831.37		1629.03	0.257949	1.19578	0.119083	2.16613	0.030301	0.112861		1629.03	0.552011	1.46613	0.119034	4.63743	3.52764e-06	2.70347e-05		1629.03	0.477402	1.39223	0.118851	4.01682	5.89889e-05	0.000830686		1629.03	0.556023	1.47021	0.118535	4.69078	2.72165e-06	2.12506e-05
B0272.2	memb-1	1262.14	893.378	672.573	922.225	752.729	849.022	1146.58	1596.06	1488.99	1320.46	1345.1	1501.13	849.418	741.222	665.953		1003.09	0.581594	1.4965	0.193646	3.00339	0.00266991	0.0224796		1003.09	-0.164088	0.892492	0.194878	-0.842004	0.399786	0.524268		1003.09	0.559176	1.47343	0.193691	2.88696	0.00388989	0.0171663		1003.09	-0.325534	0.798003	0.194426	-1.67434	0.0940647	0.161209
B0272.3	B0272.3	2378.43	2473.4	2180.68	3430.34	3070.25	3015.99	2973.51	1893.37	2307.17	3094.24	4126.01	2310.33	1966.68	2110.61	2034.57		2609.81	0.0286356	1.02005	0.185741	0.15417	0.877476	0.932113		2609.81	0.436372	1.3532	0.185665	2.35031	0.0187576	0.045149		2609.81	0.43854	1.35523	0.185565	2.36327	0.0181146	0.0540496		2609.81	-0.20244	0.869079	0.185758	-1.0898	0.275799	0.381017
B0272.4	B0272.4	635.836	419.002	410.703	655.328	521.21	678.093	707.359	991.046	816.233	705.26	747.169	790.481	896.145	774.373	683.882		696.685	0.779397	1.71641	0.18228	4.27582	1.90433e-05	0.000679715		696.685	0.340013	1.26577	0.18364	1.85152	0.0640951	0.123595		696.685	0.614226	1.53074	0.182597	3.36383	0.000768701	0.00512516		696.685	0.684245	1.60686	0.182127	3.75697	0.000171985	0.000754619
B0273.1	B0273.1	16.2057	16.6124	21.6655	13.1066	11.6341	13.4944	13.0066	33.0349	26.1737	14.1659	16.5821	20.6984	24.1976	21.2506	19.6371		18.6595	0.41126	1.32985	0.38485	1.06862	0.28524	0.469799		18.6595	-0.510442	0.702008	0.428149	-1.19221	0.23318	0.347167		18.6595	-0.0816643	0.944967	0.400341	-0.203987	0.838364	NA		18.6595	0.25709	1.19507	0.383745	0.669951	0.502889	0.606247
B0273.10	21ur-3767	0	1.84582	2.82594	3.57451	2.32683	3.3736	1.00051	0.943854	0.969398	5.05925	0.975416	1.97127	1.6688	0	0		1.82202	-0.685955	0.621594	1.31806	-0.520426	0.602767	NA		1.82202	0.984926	1.97921	1.14181	0.862599	0.388358	NA		1.82202	0.766222	1.70081	1.14117	0.671433	0.501945	NA		1.82202	-1.47415	0.359944	1.44483	-1.0203	0.307587	NA
B0273.100	21ur-13076	0	0	0	0	0	0	0	0	0	1.01185	0	0	0	0	0		0.114099	0	1	5.2679	0	1	NA		0.114099	0	1	5.2679	0	1	NA		0.114099	1.03882	2.05455	5.26765	0.197208	0.843665	NA		0.114099	0	1	5.2679	0	1	NA
B0273.101	21ur-7494	0	0	0	0	0	0	0	0	0	0	0.975416	0	0	0	0		0.0541898	0	1	5.2679	0	1	NA		0.0541898	0	1	5.2679	0	1	NA		0.0541898	1.03881	2.05453	5.26765	0.197205	0.843667	NA		0.0541898	0	1	5.2679	0	1	NA
B0273.104	21ur-10504	0	0.922911	0	0	0	0	0	0	0	0	0	0	0	0	0		0.0512728	-0.913941	0.530733	5.2679	-0.173492	0.862264	NA		0.0512728	-0.657962	0.633773	5.2679	-0.1249	0.900603	NA		0.0512728	-0.884666	0.541613	5.26765	-0.167943	0.866628	NA		0.0512728	-1.11267	0.462437	5.2679	-0.211217	0.832718	NA
B0273.105	21ur-12437	0.953277	0	0.94198	0	0	0	0	0	0	0	0	0	0	0	0		0.162483	-1.82162	0.282903	5.23408	-0.348031	0.727817	NA		0.162483	-1.56564	0.337827	5.23408	-0.299125	0.764845	NA		0.162483	-1.79232	0.288707	5.23382	-0.34245	0.732013	NA		0.162483	-2.02035	0.246498	5.23408	-0.385999	0.699497	NA
B0273.106	21ur-12233	0	0	0.94198	1.1915	1.16341	2.24906	2.00102	0	0	1.01185	0	0	0	0	0		0.879213	0.96325	1.9497	2.03138	0.474184	0.635368	NA		0.879213	2.193	4.57254	1.90332	1.15219	0.249241	NA		0.879213	0.077085	1.05488	2.11833	0.0363896	0.970972	NA		0.879213	-1.11268	0.462433	2.11834	-0.525261	0.599402	NA
B0273.107	21ur-10359	2.85983	1.84582	4.7099	7.14903	0	3.3736	4.00203	0.943854	2.90819	0	0	0	0.834399	0	0		2.5753	-0.266735	0.831199	1.13103	-0.235834	0.813562	NA		2.5753	0.157017	1.11498	1.11842	0.140392	0.88835	NA		2.5753	-4.10481	0.0581206	1.55187	-2.64507	0.00816741	NA		2.5753	-3.37101	0.0966553	1.55188	-2.17221	0.0298402	NA
B0273.109	21ur-13005	0	0	0	0	0	0	0	0	0	1.01185	0	0	0	0	0		0.115404	0	1	5.2679	0	1	NA		0.115404	0	1	5.2679	0	1	NA		0.115404	1.03882	2.05455	5.26765	0.197208	0.843665	NA		0.115404	0	1	5.2679	0	1	NA
B0273.110	21ur-12014	0	0	0	0	0	0	0	0	0	0	0	0	0	0	0		0.0591905	0	1	5.2679	0	1	NA		0.0591905	0	1	5.2679	0	1	NA		0.0591905	0	1	5.26765	0	1	NA		0.0591905	0	1	5.2679	0	1	NA
B0273.111	B0273.111	0	0	0	0	0	0	1.00051	0	0	0	0	0	0	0	0		0.170659	1.00963	2.01339	5.2679	0.191656	0.848012	NA		0.170659	0	1	5.2679	0	1	NA		0.170659	0	1	5.26765	0	1	NA		0.170659	0	1	5.2679	0	1	NA
B0273.112	B0273.112	0	0	0.94198	0	0	0	0	0	0.969398	1.01185	0	0.985637	0.834399	1.70005	0.853785		0.462585	0.047843	1.03372	2.40702	0.0198765	0.984142	NA		0.462585	-0.657969	0.63377	2.40702	-0.273355	0.784581	NA		0.462585	0.979728	1.97209	2.3328	0.41998	0.6745	NA		0.462585	1.74634	3.35506	2.21947	0.786825	0.431384	NA
B0273.114	B0273.114	0	0	0	0	1.16341	0	1.00051	0	0	1.01185	0	0	0	0	0		0.350003	1.00963	2.0134	3.2899	0.306889	0.758928	NA		0.350003	1.26562	2.4043	3.2899	0.384698	0.700461	NA		0.350003	1.03887	2.05462	3.28983	0.315781	0.752168	NA		0.350003	0	1	3.2899	0	1	NA
B0273.115	B0273.115	11.4393	4.61456	10.3618	2.38301	4.65366	4.49813	4.00203	8.49468	6.78578	3.03555	0.975416	11.8276	11.6816	4.25013	8.53785		6.87827	-0.447823	0.733148	0.68517	-0.653594	0.513373	NA		6.87827	-1.18904	0.438593	0.757329	-1.57005	0.116403	0.200387		6.87827	-0.735182	0.600742	0.703631	-1.04484	0.296097	NA		6.87827	-0.107005	0.928514	0.660943	-0.161898	0.871386	0.907036
B0273.12	21ur-3771	0.953277	1.84582	2.82594	2.38301	2.32683	3.3736	0	0	0	0	0	0.985637	0	0.850026	0		0.979944	-3.39307	0.0951885	1.70839	-1.98612	0.0470203	NA		0.979944	0.523937	1.43787	1.35249	0.387386	0.698471	NA		0.979944	-2.40203	0.189198	1.70838	-1.40603	0.159715	NA		0.979944	-2.63001	0.161543	1.70839	-1.53946	0.123692	NA
B0273.13	21ur-971	0.953277	0.922911	0.94198	0	0	1.12453	1.00051	1.88771	0.969398	1.01185	0.975416	0.985637	0.834399	0.850026	0		0.926241	0.458027	1.37366	1.46912	0.31177	0.755215	NA		0.926241	-1.17705	0.442256	1.7389	-0.67689	0.498476	NA		0.926241	0.0770617	1.05487	1.52643	0.050485	0.959736	NA		0.926241	-0.737904	0.59961	1.63657	-0.450884	0.652073	NA
B0273.14	21ur-67	0	0	0.94198	1.1915	2.32683	0	0	0	0	1.01185	0	0	0	0	0		0.41839	-0.913949	0.53073	3.18921	-0.286575	0.774437	NA		0.41839	1.79859	3.47879	3.07746	0.584438	0.558926	NA		0.41839	0.0770811	1.05488	3.18915	0.0241698	0.980717	NA		0.41839	-1.11268	0.462434	3.18921	-0.348889	0.727173	NA
B0273.15	21ur-1163	0.953277	0	0	1.1915	0	1.12453	0	0.943854	1.9388	1.01185	0.975416	2.95691	0.834399	0	0.853785		0.71024	1.52028	2.86847	1.95991	0.77569	0.437932	NA		0.71024	1.1986	2.29517	2.04569	0.585915	0.557933	NA		0.71024	2.2929	4.9004	1.88685	1.2152	0.224291	NA		0.71024	0.743482	1.67421	2.04577	0.363424	0.716288	NA
B0273.18	21ur-5402	0.953277	1.84582	0.94198	0	0	2.24906	1.00051	0	0	1.01185	0.975416	0.985637	0	0	0.853785		0.718038	-1.84437	0.278477	1.84495	-0.999686	0.317462	NA		0.718038	-0.710981	0.610905	1.75224	-0.405756	0.684922	NA		0.718038	-0.334245	0.793199	1.64622	-0.203039	0.839105	NA		0.718038	-2.0431	0.242642	1.84495	-1.1074	0.26812	NA
B0273.2	puf-7	1386.06	1508.96	1347.97	2304.37	1951.05	1847.61	1392.71	733.374	1145.83	1364.99	674.012	829.907	399.677	453.064	411.525		1396.86	-0.375153	0.771023	0.233928	-1.60371	0.108778	0.253015		1396.86	0.524383	1.43832	0.233452	2.24621	0.0246905	0.0566918		1396.86	-0.564777	0.67606	0.234144	-2.41209	0.0158613	0.049052		1396.86	-1.74682	0.297958	0.235579	-7.415	1.21622e-13	6.70052e-12
B0273.20	21ur-2650	0	0	0	0	0	1.12453	0	0	0	0	0	0	0.834399	0	0		0.225905	0	1	4.21539	0	1	NA		0.225905	1.26561	2.40429	4.21539	0.300236	0.763997	NA		0.225905	0	1	4.21526	0	1	NA		0.225905	0.810901	1.75431	4.21539	0.192367	0.847455	NA
B0273.22	21ur-5240	0	0	0.94198	0	1.16341	0	0	0	0	0	0	0	0	0	0		0.116966	-0.913941	0.530733	5.2679	-0.173492	0.862264	NA		0.116966	0.303821	1.23441	5.2679	0.057674	0.954008	NA		0.116966	-0.884652	0.541618	5.26765	-0.167941	0.86663	NA		0.116966	-1.11267	0.462437	5.2679	-0.211217	0.832718	NA
B0273.23	21ur-1410	0	0	0	0	0	0	0	0	0	0	0.975416	0	0.834399	0	0		0.100545	0	1	5.2679	0	1	NA		0.100545	0	1	5.2679	0	1	NA		0.100545	1.03882	2.05455	5.26765	0.197208	0.843665	NA		0.100545	0.810897	1.7543	5.2679	0.153932	0.877664	NA
B0273.24	21ur-4170	0	0	0	0	0	0	0	0	0	0	0	0	0	0	0.853785		0.0474325	0	1	5.2679	0	1	NA		0.0474325	0	1	5.2679	0	1	NA		0.0474325	0	1	5.26765	0	1	NA		0.0474325	0.810897	1.7543	5.2679	0.153932	0.877664	NA
B0273.25	21ur-2258	0	0	1.88396	0	0	0	1.00051	0	0.969398	0	0	0	0	0	0		0.444866	0.0606858	1.04296	3.06302	0.0198124	0.984193	NA		0.444866	-1.55711	0.339831	3.12095	-0.498922	0.617834	NA		0.444866	-1.78382	0.290414	3.12089	-0.571573	0.567611	NA		0.444866	-2.01182	0.24796	3.12095	-0.644619	0.519174	NA
B0273.3	snpc-3.1	54.3368	73.8329	59.3447	47.6602	47.7	47.2303	54.0274	57.5751	65.919	50.5925	74.1316	48.2962	38.3824	34.001	28.1749		51.0808	-0.0795444	0.946356	0.242666	-0.327793	0.743068	0.845922		51.0808	-0.396097	0.759911	0.253832	-1.56047	0.118649	0.20347		51.0808	-0.115805	0.922867	0.243752	-0.475093	0.634721	0.733475		51.0808	-0.899086	0.536226	0.254964	-3.52633	0.000421358	0.00163149
B0273.32	21ur-4921	0	0	3.76792	3.57451	1.16341	1.12453	2.00102	0.943854	0.969398	0	0	0	0	0.850026	0.853785		1.53951	0.0511686	1.0361	1.43663	0.0356171	0.971588	NA		1.53951	0.632437	1.55018	1.39974	0.451825	0.651395	NA		1.53951	-2.78266	0.145323	1.71261	-1.62481	0.104203	NA		1.53951	-1.14965	0.450736	1.60742	-0.715213	0.474478	NA
B0273.33	21ur-2196	0	0	0	0	0	0	0	0.943854	0	0	0	0	0	0	0		0.0524363	1.00963	2.01339	5.2679	0.191656	0.848012	NA		0.0524363	0	1	5.2679	0	1	NA		0.0524363	0	1	5.26765	0	1	NA		0.0524363	0	1	5.2679	0	1	NA
B0273.36	21ur-1156	0	0	0	0	0	0	0	0	0	0	0	0	0	0	1.70757		0.094865	0	1	5.2679	0	1	NA		0.094865	0	1	5.2679	0	1	NA		0.094865	0	1	5.26765	0	1	NA		0.094865	1.71898	3.29205	5.23405	0.328424	0.742591	NA
B0273.37	21ur-883	0.953277	2.76873	3.76792	3.57451	2.32683	3.3736	2.00102	0	1.9388	1.01185	0	0	1.6688	0.850026	0		2.21713	-0.943369	0.520017	1.12778	-0.836482	0.402884	NA		2.21713	0.305863	1.23616	1.00705	0.303722	0.76134	NA		2.21713	-2.81649	0.141955	1.46338	-1.92466	0.0542724	NA		2.21713	-1.56651	0.337623	1.20379	-1.30132	0.193149	NA
B0273.4	unc-5	1301.22	1827.36	2219.3	2347.26	2531.59	2097.25	1732.88	1470.52	1961.09	1217.26	1072.96	1248.8	1850.7	2163.32	2118.24		1881.85	-0.05044	0.965642	0.171092	-0.294812	0.768138	0.862478		1881.85	0.383367	1.30438	0.170959	2.24244	0.0249328	0.0571092		1881.85	-0.595701	0.661723	0.171651	-3.47043	0.000519632	0.00387192		1881.85	0.197384	1.14662	0.170787	1.15573	0.247791	0.350675
B0273.41	21ur-13225	0	0	0	0	0	0	0	0	0	0	0	0	0	0	0.853785		0.0474325	0	1	5.2679	0	1	NA		0.0474325	0	1	5.2679	0	1	NA		0.0474325	0	1	5.26765	0	1	NA		0.0474325	0.810897	1.7543	5.2679	0.153932	0.877664	NA
B0273.45	21ur-11507	0.953277	1.84582	0.94198	0	0	2.24906	1.00051	0	0	1.01185	0.975416	0.985637	0	0	0.853785		0.718038	-1.84437	0.278477	1.84495	-0.999686	0.317462	NA		0.718038	-0.710981	0.610905	1.75224	-0.405756	0.684922	NA		0.718038	-0.334245	0.793199	1.64622	-0.203039	0.839105	NA		0.718038	-2.0431	0.242642	1.84495	-1.1074	0.26812	NA
B0273.46	21ur-6820	0	0.922911	0	0	0	0	0	0	0	0	0	0	0	0	0		0.0512728	-0.913941	0.530733	5.2679	-0.173492	0.862264	NA		0.0512728	-0.657962	0.633773	5.2679	-0.1249	0.900603	NA		0.0512728	-0.884666	0.541613	5.26765	-0.167943	0.866628	NA		0.0512728	-1.11267	0.462437	5.2679	-0.211217	0.832718	NA
B0273.47	21ur-14228	0	1.84582	2.82594	3.57451	2.32683	3.3736	1.00051	0.943854	0.969398	5.05925	0.975416	1.97127	1.6688	0	0		1.82202	-0.685955	0.621594	1.31806	-0.520426	0.602767	NA		1.82202	0.984926	1.97921	1.14181	0.862599	0.388358	NA		1.82202	0.766222	1.70081	1.14117	0.671433	0.501945	NA		1.82202	-1.47415	0.359944	1.44483	-1.0203	0.307587	NA
B0273.48	21ur-13995	0	0	0.94198	0	1.16341	0	0	0	0	0	0	0	0	0	0		0.176157	-0.913941	0.530733	5.2679	-0.173492	0.862264	NA		0.176157	0.303821	1.23441	5.2679	0.057674	0.954008	NA		0.176157	-0.884639	0.541623	5.26765	-0.167938	0.866632	NA		0.176157	-1.11267	0.462437	5.2679	-0.211217	0.832718	NA
B0273.49	21ur-11669	0	0	0	0	0	0	0	0	0	0	0	0	0	0	0		0.0591905	0	1	5.2679	0	1	NA		0.0591905	0	1	5.2679	0	1	NA		0.0591905	0	1	5.26765	0	1	NA		0.0591905	0	1	5.2679	0	1	NA
B0273.5	21ur-4213	0	0.922911	1.88396	2.38301	3.49024	3.3736	1.00051	0.943854	2.90819	1.01185	0.975416	0	0	0	1.70757		1.49034	0.786425	1.72479	1.37242	0.573021	0.56663	NA		1.49034	1.71809	3.29	1.31447	1.30706	0.191194	NA		1.49034	-0.504859	0.704729	1.58336	-0.318852	0.749839	NA		1.49034	-0.730235	0.602806	1.58279	-0.461358	0.644542	NA
B0273.50	21ur-15223	0	0	0	0	0	0	0	0	0	1.01185	0	0	0	0	0		0.114099	0	1	5.2679	0	1	NA		0.114099	0	1	5.2679	0	1	NA		0.114099	1.03882	2.05455	5.26765	0.197208	0.843665	NA		0.114099	0	1	5.2679	0	1	NA
B0273.53	21ur-11752	0	0	0	0	0	1.12453	0	0	0	0	0	0	0	0	0		0.062474	0	1	5.2679	0	1	NA		0.062474	1.2656	2.40428	5.2679	0.240248	0.810138	NA		0.062474	0	1	5.26765	0	1	NA		0.062474	0	1	5.2679	0	1	NA
B0273.56	21ur-10111	0	0	0.94198	0	0	1.12453	0	0	0	0	0	0	0	0	0		0.231881	-0.913946	0.530732	4.18082	-0.218605	0.826958	NA		0.231881	0.303823	1.23441	4.18082	0.0726707	0.942068	NA		0.231881	-0.884663	0.541614	4.18069	-0.211607	0.832414	NA		0.231881	-1.11268	0.462436	4.18082	-0.266138	0.790133	NA
B0273.57	21ur-14481	0	0	0.94198	0	1.16341	0	0	0	0	0	0	0	0	0	0		0.116966	-0.913941	0.530733	5.2679	-0.173492	0.862264	NA		0.116966	0.303821	1.23441	5.2679	0.057674	0.954008	NA		0.116966	-0.884652	0.541618	5.26765	-0.167941	0.86663	NA		0.116966	-1.11267	0.462437	5.2679	-0.211217	0.832718	NA
B0273.63	21ur-14134	0	0	1.88396	1.1915	1.16341	0	1.00051	0.943854	0.969398	1.01185	0	1.97127	0.834399	0	0.853785		0.773961	0.631183	1.54883	1.76469	0.357674	0.720588	NA		0.773961	0.310947	1.24052	1.85868	0.167295	0.867138	NA		0.773961	0.66291	1.58327	1.76434	0.375726	0.70712	NA		0.773961	-0.153881	0.898829	1.86065	-0.0827029	0.934088	NA
B0273.64	21ur-13165	2.85983	6.46038	3.76792	9.53204	6.98049	6.74719	6.00305	6.60698	7.75518	6.0711	6.82791	6.89946	5.84079	4.25013	5.9765		6.30525	0.634071	1.55194	0.618479	1.02521	0.305264	NA		6.30525	0.822071	1.76794	0.622335	1.32095	0.186519	0.291482		6.30525	0.593233	1.50862	0.622458	0.953048	0.340566	NA		6.30525	0.291613	1.22401	0.626825	0.465222	0.641772	0.728276
B0273.67	21ur-13158	42.8975	83.062	88.5461	70.2988	94.2366	55.1021	77.0391	69.8452	72.7048	51.6044	42.9183	43.368	67.5863	84.1525	86.2323		68.3559	0.0323433	1.02267	0.257983	0.12537	0.900231	0.946304		68.3559	0.0319275	1.02238	0.26143	0.122126	0.902799	0.935152		68.3559	-0.639276	0.642035	0.26891	-2.37729	0.0174404	0.0525379		68.3559	0.148354	1.1083	0.25446	0.583014	0.559884	0.657745
B0273.68	21ur-12388	0	0	0	0	0	1.12453	0	0	0	0	0	0	0	0	0		0.062474	0	1	5.2679	0	1	NA		0.062474	1.2656	2.40428	5.2679	0.240248	0.810138	NA		0.062474	0	1	5.26765	0	1	NA		0.062474	0	1	5.2679	0	1	NA
B0273.7	21ur-5385	0	0.922911	0	0	0	0	0	0	0	0	0	0	0	0	0		0.0512728	-0.913941	0.530733	5.2679	-0.173492	0.862264	NA		0.0512728	-0.657962	0.633773	5.2679	-0.1249	0.900603	NA		0.0512728	-0.884666	0.541613	5.26765	-0.167943	0.866628	NA		0.0512728	-1.11267	0.462437	5.2679	-0.211217	0.832718	NA
B0273.73	21ur-11104	0.953277	0.922911	0	0	0	0	0	0.943854	0	1.01185	0	0	0.834399	0	0		0.43081	-0.846667	0.556068	2.85339	-0.296723	0.766678	NA		0.43081	-1.55248	0.340924	2.85339	-0.544082	0.586385	NA		0.43081	-0.817426	0.567453	2.85335	-0.28648	0.774511	NA		0.43081	-1.0454	0.484511	2.85339	-0.366371	0.714089	NA
B0273.74	21ur-12646	0	0	1.88396	1.1915	1.16341	0	0	0.943854	0	2.0237	0	0.985637	0.834399	0	0		1.19584	-0.849555	0.554956	1.90034	-0.447054	0.654836	NA		1.19584	0.310277	1.23995	1.80517	0.171883	0.86353	NA		1.19584	0.668673	1.58961	1.70693	0.391741	0.695249	NA		1.19584	-1.04829	0.483542	1.90034	-0.551631	0.581201	NA
B0273.76	21ur-13699	0	0	0	1.1915	0	0	0	0	0	0	0	0	0	0	0		0.125385	0	1	5.2679	0	1	NA		0.125385	1.2656	2.40428	5.2679	0.240248	0.810138	NA		0.125385	0	1	5.26765	0	1	NA		0.125385	0	1	5.2679	0	1	NA
B0273.77	21ur-13592	63.8696	83.062	92.314	121.534	138.446	97.8343	63.032	65.1259	77.5518	49.5807	48.7708	67.0233	74.2615	77.3523	93.9164		84.9627	-0.218204	0.859635	0.217022	-1.00545	0.314682	0.49951		84.9627	0.579164	1.49398	0.209822	2.76027	0.00577536	0.0167553		84.9627	-0.532991	0.69112	0.223032	-2.38976	0.0168595	0.0512047		84.9627	0.0364745	1.0256	0.210829	0.173005	0.862648	0.901191
B0273.78	21ur-15046	0	0	1.88396	5.95752	1.16341	1.12453	1.00051	1.88771	1.9388	0	0.975416	0	1.6688	0	0		1.90772	1.3646	2.57505	1.487	0.917683	0.358785	NA		1.90772	2.12273	4.35518	1.44516	1.46886	0.141871	NA		1.90772	-0.819887	0.566486	1.78361	-0.45968	0.645746	NA		1.90772	-0.15728	0.896714	1.68471	-0.0933577	0.925619	NA
B0273.8	21ur-3591	0	0	0	0	0	1.12453	0	0	0	0	0	0	0.834399	0	0		0.283095	0	1	3.44114	0	1	NA		0.283095	1.26561	2.4043	3.44114	0.36779	0.71303	NA		0.283095	0	1	3.44106	0	1	NA		0.283095	0.810903	1.75431	3.44114	0.23565	0.813704	NA
B0273.83	21ur-13714	0	0	0.94198	0	0	0	0	0	0.969398	1.01185	0	0	0	0	0		0.162402	0.0478425	1.03372	5.2679	0.00908188	0.992754	NA		0.162402	-0.657962	0.633773	5.2679	-0.1249	0.900603	NA		0.162402	0.0770509	1.05486	5.26765	0.0146272	0.98833	NA		0.162402	-1.11267	0.462437	5.2679	-0.211217	0.832718	NA
B0273.84	21ur-13505	0	0	0	0	0	0	0	0.943854	0	0	0	0	0.834399	0	0		0.0987918	1.00963	2.01339	5.2679	0.191656	0.848012	NA		0.0987918	0	1	5.2679	0	1	NA		0.0987918	0	1	5.26765	0	1	NA		0.0987918	0.810897	1.7543	5.2679	0.153932	0.877664	NA
B0273.88	21ur-9893	0	0	0	0	0	0	0	0	0	0	0	0	0.834399	0	0		0.0463555	0	1	5.2679	0	1	NA		0.0463555	0	1	5.2679	0	1	NA		0.0463555	0	1	5.26765	0	1	NA		0.0463555	0.810897	1.7543	5.2679	0.153932	0.877664	NA
B0273.89	21ur-9060	0	0	0	0	0	0	0	0	0.969398	0	0	0	0	0	0.853785		0.101288	1.00963	2.01339	5.2679	0.191656	0.848012	NA		0.101288	0	1	5.2679	0	1	NA		0.101288	0	1	5.26765	0	1	NA		0.101288	0.810897	1.7543	5.2679	0.153932	0.877664	NA
B0273.9	21ur-4254	0	0	0	0	0	0	0	0	0	1.01185	0	0	0	0	0.853785		0.161531	0	1	5.2679	0	1	NA		0.161531	0	1	5.2679	0	1	NA		0.161531	1.03883	2.05457	5.26765	0.19721	0.843663	NA		0.161531	0.810897	1.7543	5.2679	0.153932	0.877664	NA
B0273.91	21ur-9596	0	0	0.94198	0	1.16341	0	0	0	0	0	0	0	0	0	0		0.176157	-0.913941	0.530733	5.2679	-0.173492	0.862264	NA		0.176157	0.303821	1.23441	5.2679	0.057674	0.954008	NA		0.176157	-0.884639	0.541623	5.26765	-0.167938	0.866632	NA		0.176157	-1.11267	0.462437	5.2679	-0.211217	0.832718	NA
B0273.92	21ur-8002	0.953277	0.922911	0	0	0	0	0	0	0	0	0	0	0	0	0		0.218614	-1.80815	0.285558	4.95029	-0.36526	0.714917	NA		0.218614	-1.55217	0.340998	4.95029	-0.313551	0.753862	NA		0.218614	-1.77884	0.291417	4.95008	-0.359356	0.719328	NA		0.218614	-2.00688	0.248811	4.95029	-0.405405	0.68518	NA
B0273.95	21ur-9747	0	0	0	0	0	0	0	0	0	0	0	0	0	0.850026	0		0.0472236	0	1	5.2679	0	1	NA		0.0472236	0	1	5.2679	0	1	NA		0.0472236	0	1	5.26765	0	1	NA		0.0472236	0.810897	1.7543	5.2679	0.153932	0.877664	NA
B0273.96	21ur-8181	0	0	0	0	0	0	0	0	0	0	0	0	0	0	0		0.0591905	0	1	5.2679	0	1	NA		0.0591905	0	1	5.2679	0	1	NA		0.0591905	0	1	5.26765	0	1	NA		0.0591905	0	1	5.2679	0	1	NA
B0273.98	21ur-11786	0	0	0	2.38301	0	1.12453	0	0	0	0	0	0	0.834399	0	0		0.473369	0	1	2.74966	0	1	NA		0.473369	2.75569	6.75376	2.61965	1.05193	0.292831	NA		0.473369	0	1	2.74962	0	1	NA		0.473369	0.810905	1.75431	2.74966	0.294911	0.768062	NA
B0273.99	21ur-5966	0.953277	0	0	0	0	0	0	0	0	0	0	0	0	0	0		0.11015	-0.913941	0.530733	5.2679	-0.173492	0.862264	NA		0.11015	-0.657962	0.633773	5.2679	-0.1249	0.900603	NA		0.11015	-0.884652	0.541618	5.26765	-0.167941	0.86663	NA		0.11015	-1.11267	0.462437	5.2679	-0.211217	0.832718	NA
B0280.1	ggtb-1	1633.92	1248.7	952.341	916.267	893.503	971.596	1572.8	2099.13	1815.68	1629.08	1931.32	1794.85	978.75	1009.83	963.924		1236.68	0.517146	1.43112	0.165004	3.13413	0.00172362	0.0165207		1236.68	-0.463292	0.725329	0.166511	-2.78235	0.00539662	0.015824		1236.68	0.481854	1.39654	0.165055	2.91935	0.00350758	0.0158767		1236.68	-0.377203	0.769929	0.165694	-2.2765	0.0228158	0.0493288
B0280.10	pot-1	816.958	659.882	412.587	290.727	248.971	290.129	726.369	1079.77	823.019	759.899	854.464	955.083	525.671	437.763	405.548		545.144	0.476898	1.39175	0.213011	2.23884	0.0251662	0.100698		545.144	-1.18699	0.43922	0.217976	-5.44548	5.16653e-08	6.56358e-07		545.144	0.443616	1.36001	0.21309	2.08182	0.037359	0.0921399		545.144	-0.464699	0.724622	0.214222	-2.16924	0.0300644	0.0621415
B0280.11	B0280.11	0	1.84582	0	0	0	0	0	0.943854	0	0	0	1.97127	0	0	0		0.322382	-0.82641	0.563931	3.83114	-0.215709	0.829215	NA		0.322382	-1.53222	0.345745	3.83114	-0.399938	0.689202	NA		0.322382	0.0922285	1.06602	3.78614	0.0243595	0.980566	NA		0.322382	-1.98693	0.252275	3.83114	-0.518626	0.604022	NA
B0280.12	glr-2	81.0285	108.904	151.659	110.81	138.446	101.208	59.03	68.9013	67.8578	60.711	79.0087	76.8797	118.485	136.854	139.167		101.082	-0.802486	0.57336	0.231035	-3.47344	0.000513834	0.00698558		101.082	0.0362834	1.02547	0.223492	0.162348	0.871032	0.913653		101.082	-0.656691	0.634332	0.229294	-2.86396	0.00418377	0.0180599		101.082	0.207294	1.15452	0.218	0.95089	0.34166	0.450896
B0280.13	viro-2	139.178	128.285	224.191	184.683	228.029	192.295	96.0488	95.3292	70.766	60.711	79.0087	96.5925	168.549	197.206	202.347		156.084	-0.907173	0.533229	0.225707	-4.01926	5.83825e-05	0.0015055		156.084	0.299558	1.23077	0.217307	1.3785	0.168048	0.268617		156.084	-1.05584	0.481017	0.227936	-4.63218	3.61828e-06	0.000128216		156.084	0.208563	1.15554	0.21525	0.968934	0.332578	0.441129
B0280.14	sls-2.5	1.90655	0	0	0	0	1.12453	0	2.83156	0.969398	1.01185	0	0	0	0.850026	0		0.482996	1.00657	2.00913	2.61395	0.385079	0.700179	NA		0.482996	-0.607411	0.656374	2.77315	-0.219033	0.826625	NA		0.482996	-0.83415	0.560913	2.77311	-0.300799	0.763568	NA		0.482996	-1.06212	0.478927	2.77315	-0.383002	0.701718	NA
B0280.15	sls-2.16	0	0	0	0	0	0	0	0	0.969398	0	0	0	0	0	0		0.11174	1.00963	2.01339	5.2679	0.191656	0.848012	NA		0.11174	0	1	5.2679	0	1	NA		0.11174	0	1	5.26765	0	1	NA		0.11174	0	1	5.2679	0	1	NA
B0280.16	sls-2.18	0.953277	0	0	0	0	0	0	0.943854	1.9388	0	0	0	0	0	0		0.213107	1.51455	2.85709	4.9309	0.307154	0.758726	NA		0.213107	-0.657963	0.633772	5.00005	-0.131591	0.895307	NA		0.213107	-0.884641	0.541622	4.99983	-0.176934	0.85956	NA		0.213107	-1.11267	0.462437	5.00005	-0.222532	0.8239	NA
B0280.17	B0280.17	24.7852	33.2248	59.3447	88.1714	83.7659	80.9663	52.0264	25.4841	32.9595	50.5925	27.3116	38.4399	28.3696	30.6009	32.4438		43.7102	-0.09079	0.939008	0.331224	-0.274104	0.784004	0.872452		43.7102	1.10728	2.15439	0.317673	3.48559	0.000491059	0.00202205		43.7102	-0.0143918	0.990074	0.330331	-0.0435679	0.965249	0.978111		43.7102	-0.360834	0.778714	0.332622	-1.08482	0.278003	0.383438
B0280.18	21ur-11608	1.90655	3.69164	6.59386	7.14903	9.30732	7.87172	5.00254	1.88771	3.87759	4.0474	2.92625	1.97127	2.5032	0	2.56136		3.92621	-0.187366	0.878207	0.789553	-0.237307	0.812419	NA		3.92621	0.995899	1.99432	0.730741	1.36286	0.172926	NA		3.92621	-0.450838	0.731618	0.815975	-0.552515	0.580596	NA		3.92621	-1.26628	0.415731	0.884269	-1.43201	0.152142	NA
B0280.2	B0280.2	7.62622	20.304	17.8976	23.8301	34.9024	25.8642	8.00406	5.66312	10.6634	8.0948	2.92625	3.94255	17.5224	19.5506	20.4908		17.7444	-0.918972	0.528886	0.458515	-2.00424	0.0450448	0.145195		17.7444	0.881489	1.84228	0.394417	2.23491	0.025423	0.0579743		17.7444	-1.62545	0.32411	0.515347	-3.15408	0.00161004	NA		17.7444	0.325488	1.25309	0.397037	0.819793	0.412334	0.520942
B0280.21	B0280.21	3.81311	1.84582	6.59386	4.76602	3.49024	2.24906	2.00102	2.83156	2.90819	1.01185	1.95083	0.985637	6.67519	3.4001	3.41514		3.24311	-0.657595	0.633934	0.895809	-0.734079	0.4629	NA		3.24311	-0.225181	0.855487	0.87891	-0.256205	0.797792	NA		3.24311	-1.62761	0.323623	1.03091	-1.57881	0.114379	NA		3.24311	0.143066	1.10425	0.819905	0.174491	0.861479	NA
B0280.22	B0280.22	6.67294	11.0749	17.8976	7.14903	11.6341	11.2453	4.00203	4.71927	8.72458	8.0948	4.87708	6.89946	16.688	17.0005	12.8068		9.86858	-1.03021	0.489638	0.545644	-1.88807	0.0590168	NA		9.86858	-0.245293	0.843645	0.512069	-0.479022	0.631923	0.732453		9.86858	-0.846445	0.556153	0.53477	-1.58282	0.113462	NA		9.86858	0.382903	1.30396	0.46891	0.81658	0.414168	0.522723
B0280.3	rpia-1	1689.21	1352.99	914.662	1360.7	1263.47	1447.27	1526.78	1658.35	1653.79	1592.65	2026.91	1671.64	1064.69	1062.53	957.093		1434.78	0.290408	1.22299	0.173386	1.67492	0.0939506	0.230713		1434.78	0.0412698	1.02902	0.173891	0.237332	0.812399	0.871241		1434.78	0.419338	1.33731	0.173306	2.41965	0.0155356	0.0482994		1434.78	-0.359341	0.779521	0.173827	-2.06723	0.0387129	0.0768381
B0280.4	odd-1	252.618	210.424	133.761	224.003	214.068	227.155	285.145	384.148	348.014	340.993	404.798	343.987	159.37	178.505	127.214		239.02	0.770001	1.70527	0.20128	3.82552	0.000130498	0.00268459		239.02	0.156793	1.11481	0.205319	0.763659	0.44507	0.568564		239.02	0.868993	1.82639	0.201047	4.32235	1.54377e-05	0.000343093		239.02	-0.35948	0.779446	0.205702	-1.74758	0.0805376	0.141584
B0280.5	cpg-2	2253.55	2336.81	1319.71	1248.7	923.751	917.618	1416.72	1256.27	1549.1	931.914	666.209	738.242	448.907	522.766	508.002		1177.45	-0.485269	0.714364	0.2029	-2.39167	0.0167721	0.0780479		1177.45	-0.935711	0.522785	0.203644	-4.59483	4.33094e-06	3.23701e-05		1177.45	-1.33906	0.395278	0.203893	-6.56745	5.11839e-11	1.63649e-08		1177.45	-1.99796	0.250354	0.204646	-9.76302	1.62248e-22	2.90305e-20
B0280.6	B0280.6	0	0	0.94198	1.1915	0	0	0	0	0	0	0	0	0	0	0		0.236908	-0.913943	0.530733	4.85472	-0.188259	0.850674	NA		0.236908	0.303822	1.23441	4.85472	0.0625828	0.950099	NA		0.236908	-0.884641	0.541622	4.85452	-0.182231	0.855402	NA		0.236908	-1.11267	0.462437	4.85472	-0.229194	0.818718	NA
B0280.7	B0280.7	102.954	102.443	102.676	45.2772	53.5171	74.2191	59.03	94.3854	74.6436	74.8769	87.7874	111.377	146.02	173.405	195.517		97.7893	-0.431734	0.74137	0.227338	-1.89908	0.0575538	0.169787		97.7893	-0.829286	0.562808	0.238228	-3.48105	0.000499444	0.00204913		97.7893	-0.168258	0.889916	0.224402	-0.749809	0.45337	0.57683		97.7893	0.740892	1.67121	0.215067	3.44494	0.000571184	0.00211617
B0280.8	nhr-10	1141.07	1120.41	1115.3	1109.29	1034.28	1025.57	1431.73	1369.53	1258.28	1246.6	1459.22	1372.99	999.61	990.28	852.932		1135.84	0.265603	1.20214	0.100377	2.64605	0.00814382	0.0487729		1135.84	-0.0916997	0.938417	0.101683	-0.901822	0.367151	0.491908		1135.84	0.272655	1.20803	0.100415	2.71527	0.00662216	0.0254051		1135.84	-0.24823	0.841929	0.10098	-2.4582	0.0139634	0.0326389
B0280.9	B0280.9	2201.12	1926.12	1486.44	1538.23	1226.24	1451.77	2236.14	2397.39	2360.48	2507.36	3056.95	2427.62	1227.4	1302.24	1117.6		1773.76	0.317223	1.24593	0.146945	2.15879	0.0308662	0.114314		1773.76	-0.412994	0.751063	0.147906	-2.79226	0.00523407	0.0154095		1773.76	0.509659	1.42371	0.146839	3.47086	0.000518791	0.0038677		1773.76	-0.622104	0.649723	0.147603	-4.21472	2.50093e-05	0.000143521
B0281.1	B0281.1	0	0	0	0	0	0	1.00051	0	0	0	0	0	0	0.850026	0.853785		0.208125	1.00963	2.0134	4.32599	0.233387	0.815461	NA		0.208125	0	1	4.32599	0	1	NA		0.208125	0	1	4.32584	0	1	NA		0.208125	1.71567	3.28449	4.28497	0.400393	0.688867	NA
B0281.3	B0281.3	9.53277	5.53747	13.1877	4.76602	3.49024	6.74719	4.00203	5.66312	3.87759	8.0948	8.77874	6.89946	10.0128	2.55008	10.2454		9.51723	-1.0561	0.480931	0.622518	-1.6965	0.089792	NA		9.51723	-0.907411	0.533141	0.631682	-1.4365	0.15086	0.246997		9.51723	-0.247342	0.842447	0.570423	-0.433612	0.664571	NA		9.51723	-0.306248	0.808742	0.561954	-0.54497	0.585774	0.680076
B0281.4	B0281.4	12.3926	9.22911	4.7099	2.38301	1.16341	2.24906	7.00356	7.55083	15.5104	6.0711	3.90166	5.91382	5.84079	1.70005	5.9765		6.30782	0.192642	1.14285	0.584983	0.329312	0.74192	NA		6.30782	-2.18296	0.220223	0.831467	-2.62543	0.00865395	0.0235586		6.30782	-0.729985	0.60291	0.636381	-1.14709	0.251346	NA		6.30782	-0.960091	0.514025	0.636535	-1.50831	0.131476	0.212153
B0281.5	B0281.5	10211.5	7432.2	4662.8	4356.14	3579.83	3805.42	7507.81	10603.3	8961.11	9332.29	9244.99	10536.5	4385.6	3721.41	3378.43		6150.97	0.27937	1.21366	0.214054	1.30514	0.191846	0.364056		6150.97	-0.925869	0.526363	0.21436	-4.31923	1.56577e-05	9.9644e-05		6150.97	0.384245	1.30518	0.214045	1.79516	0.072629	0.150855		6150.97	-0.95764	0.514899	0.214238	-4.46998	7.8227e-06	5.26198e-05
B0281.6	B0281.6	104.86	92.2911	46.157	27.4046	22.1049	22.4906	61.031	132.14	89.1846	67.794	63.402	94.6212	46.7264	31.4509	27.3211		54.3351	0.21616	1.16164	0.330697	0.65365	0.513337	0.679398		54.3351	-1.75777	0.295704	0.368448	-4.77074	1.8355e-06	1.527e-05		54.3351	-0.107506	0.928191	0.333679	-0.322183	0.747314	0.824359		54.3351	-1.20463	0.433882	0.344804	-3.49365	0.000476458	0.00180939
B0281.7	B0281.7	0	0	0.94198	0	0	0	0	0	0	0	0	0	0	0	0		0.0523322	-0.913941	0.530733	5.2679	-0.173492	0.862264	NA		0.0523322	-0.657962	0.633773	5.2679	-0.1249	0.900603	NA		0.0523322	-0.884666	0.541613	5.26765	-0.167943	0.866628	NA		0.0523322	-1.11267	0.462437	5.2679	-0.211217	0.832718	NA
B0284.1	pals-26	26.6918	33.2248	19.7816	29.7876	32.5756	25.8642	21.0107	54.7435	33.9289	19.2252	28.2871	19.7127	195.249	179.355	206.616		76.0949	0.464621	1.37995	0.316073	1.46998	0.141567	0.300317		76.0949	0.144519	1.10536	0.330019	0.43791	0.661452	0.756954		76.0949	-0.245065	0.843778	0.334937	-0.731676	0.464367	0.587773		76.0949	2.86534	7.28705	0.290808	9.85302	6.65133e-23	1.21569e-20
B0284.2	pals-27	40.0376	39.6852	32.0273	44.0857	44.2098	48.3549	54.0274	56.6312	46.5311	50.5925	43.8937	64.0664	47.5608	50.1515	52.9347		51.5605	0.492387	1.40677	0.238221	2.06694	0.0387403	0.131943		51.5605	0.290877	1.22338	0.248083	1.1725	0.240996	0.356275		51.5605	0.504409	1.41854	0.238544	2.11453	0.0344699	0.0867481		51.5605	0.430497	1.3477	0.235767	1.82595	0.0678584	0.122787
B0284.3	B0284.3	1674.91	1181.33	781.843	631.498	521.21	630.862	1202.61	2151.99	1743.95	1641.22	1482.63	1931.85	1507.76	1227.44	1396.79		1161.73	0.48707	1.4016	0.235069	2.07203	0.0382624	0.131038		1161.73	-1.02835	0.490271	0.237095	-4.33728	1.44259e-05	9.28479e-05		1161.73	0.474779	1.38971	0.235093	2.01954	0.0434316	0.102674		1161.73	0.18372	1.13581	0.235132	0.781351	0.434596	0.542304
B0284.4	pals-28	0	1.84582	1.88396	0	1.16341	0	2.00102	2.83156	3.87759	0	0.975416	0.985637	0	0	0		1.26841	1.21958	2.32879	1.30674	0.933299	0.350666	NA		1.26841	-1.58701	0.33286	1.69214	-0.937873	0.34831	NA		1.26841	-0.922631	0.527546	1.5874	-0.581223	0.56109	NA		1.26841	-3.00352	0.124696	1.69214	-1.77498	0.0759004	NA
B0284.5	B0284.5	0.953277	6.46038	3.76792	5.95752	10.4707	11.2453	5.00254	5.66312	4.84699	3.03555	1.95083	7.8851	5.0064	5.10015	5.9765		4.7434	0.466707	1.38195	0.75735	0.616237	0.537738	NA		4.7434	1.30393	2.469	0.72829	1.79039	0.0733908	0.137875		4.7434	0.197113	1.1464	0.776878	0.253725	0.799708	NA		4.7434	0.517585	1.43156	0.743567	0.696083	0.486377	0.590826
B0284.6	srpr-1.1	6.67294	7.38329	1.88396	1.1915	2.32683	1.12453	1.00051	20.7648	13.5716	1.01185	3.90166	2.95691	6.67519	8.50026	9.39164		5.89915	1.15302	2.22379	0.74962	1.53814	0.124014	NA		5.89915	-1.78187	0.290806	1.0125	-1.75987	0.0784303	0.145573		5.89915	-1.0132	0.495445	0.875161	-1.15773	0.246973	NA		5.89915	0.622604	1.53965	0.759375	0.81989	0.412279	0.520918
B0284.7	B0284.7	0	0	0	0	0	0	0	0	0	0	0	0	0	0	0		0.0571906	0	1	5.2679	0	1	NA		0.0571906	0	1	5.2679	0	1	NA		0.0571906	0	1	5.26765	0	1	NA		0.0571906	0	1	5.2679	0	1	NA
B0285.1	cdk-12	1299.32	2064.55	3176.36	4300.14	4147.57	3696.34	2240.14	1013.7	1785.63	1863.83	1007.6	1472.54	1275.8	1394.04	1191.88		2348.59	-0.37618	0.770475	0.28825	-1.30505	0.191876	0.364068		2348.59	0.892814	1.85679	0.287898	3.10114	0.00192775	0.00657857		2348.59	-0.590397	0.66416	0.288377	-2.0473	0.0406282	0.0981187		2348.59	-0.760108	0.590452	0.288345	-2.63611	0.00838634	0.0212193
B0285.10	ckb-3	13.3459	10.152	24.4915	23.8301	19.7781	16.868	9.00457	3.77542	8.72458	13.1541	17.5575	18.7271	25.032	18.7006	21.3446		16.3684	-1.16338	0.446464	0.487583	-2.38602	0.0170318	0.0788234		16.3684	0.332735	1.2594	0.428146	0.777154	0.437068	0.5607		16.3684	0.0453825	1.03196	0.430142	0.105506	0.915974	NA		16.3684	0.441091	1.35763	0.412788	1.06857	0.285265	0.39098
B0285.11	B0285.11	0.953277	1.84582	1.88396	1.1915	0	0	4.00203	0	0	0	1.95083	0.985637	1.6688	2.55008	0.853785		0.993651	-0.24482	0.843921	1.60076	-0.15294	0.878446	NA		0.993651	-1.91125	0.265862	1.85448	-1.03061	0.302722	NA		0.993651	-0.666642	0.629971	1.65828	-0.402009	0.687678	NA		0.993651	0.11421	1.08238	1.54874	0.0737439	0.941214	NA
B0285.12	srpr-1.2	8.57949	12.9208	25.4334	3.57451	0	2.24906	10.0051	37.7542	17.4492	3.03555	0.975416	1.97127	20.86	7.65023	6.83028		9.48984	0.477138	1.39198	0.622704	0.766235	0.443536	NA		9.48984	-3.0159	0.12363	0.878997	-3.43107	0.000601202	0.00240396		9.48984	-2.97835	0.12689	0.838483	-3.55207	0.000382219	NA		9.48984	-0.407629	0.753861	0.637642	-0.639276	0.522644	0.624483
B0285.13	21ur-14269	15.2524	42.4539	40.5051	25.0216	12.7976	14.6189	21.0107	16.9894	24.2349	18.2133	9.75416	14.7846	11.6816	21.2506	14.5143		18.5221	-0.660544	0.63264	0.414544	-1.59342	0.111065	0.256156		18.5221	-0.910099	0.532149	0.430675	-2.11319	0.0345845	0.0745173		18.5221	-1.20367	0.434169	0.433205	-2.77853	0.00546063	NA		18.5221	-1.05191	0.48233	0.420102	-2.50393	0.0122821	0.0292849
B0285.14	B0285.14	0.953277	0	0	0	1.16341	0	0	0.943854	0	0	0	0.985637	0.834399	0	0.853785		0.377766	0.047843	1.03372	2.67752	0.0178684	0.985744	NA		0.377766	0.303824	1.23441	2.67752	0.113472	0.909656	NA		0.377766	0.0770799	1.05488	2.67749	0.0287881	0.977034	NA		0.377766	0.742769	1.67338	2.61226	0.284339	0.77615	NA
B0285.15	B0285.15	0	0	0.94198	0	0	0	0	0	0	0	0	0	0	0	0		0.225986	-0.913941	0.530733	5.2679	-0.173492	0.862264	NA		0.225986	-0.657962	0.633773	5.2679	-0.1249	0.900603	NA		0.225986	-0.884632	0.541626	5.26765	-0.167937	0.866633	NA		0.225986	-1.11267	0.462437	5.2679	-0.211217	0.832718	NA
B0285.16	B0285.16	0.953277	0	0	1.1915	1.16341	0	0	0	0	1.01185	0	0	0	0	0		0.297887	-0.913948	0.530731	3.42013	-0.267226	0.789295	NA		0.297887	1.21778	2.32588	3.36714	0.361665	0.717602	NA		0.297887	0.0770739	1.05488	3.42006	0.0225359	0.982021	NA		0.297887	-1.11268	0.462435	3.42013	-0.325333	0.744929	NA
B0285.17	B0285.17	0	0	0.94198	0	0	2.24906	0	0	0	1.01185	1.95083	0	0	0	0		0.57533	-0.913951	0.53073	2.49756	-0.365938	0.714411	NA		0.57533	1.17225	2.25363	2.43125	0.482158	0.629694	NA		0.57533	1.55446	2.93723	2.35492	0.66009	0.509196	NA		0.57533	-1.11268	0.462434	2.49756	-0.445508	0.655952	NA
B0285.3	B0285.3	1975.19	1514.5	895.823	370.558	390.907	369.971	1473.75	2612.59	2262.57	2052.03	2024.96	2400.03	1264.95	1069.33	1061.26		1252.15	0.53388	1.44782	0.234226	2.27934	0.0226467	0.0942903		1252.15	-1.95457	0.257998	0.238069	-8.2101	2.20999e-16	1.57178e-14		1252.15	0.562617	1.47695	0.234226	2.40203	0.0163045	0.0500336		1252.15	-0.369056	0.774289	0.234653	-1.57277	0.115771	0.19113
B0285.4	lcmt-1	2081	1673.24	1038.06	795.925	736.442	832.154	1951.99	2581.44	2237.37	2222.02	2477.56	2333	1191.52	1166.24	1071.5		1464.16	0.498701	1.41294	0.189775	2.62785	0.00859264	0.0505996		1464.16	-1.0191	0.493424	0.191669	-5.31698	1.05506e-07	1.22919e-06		1464.16	0.55338	1.46752	0.189761	2.91619	0.00354339	0.0160181		1464.16	-0.482779	0.715598	0.190341	-2.53639	0.0112001	0.0271079
B0285.5	hse-5	2403.21	2485.4	2158.08	2968.04	2736.35	2697.75	3039.54	2307.72	2967.33	3128.64	2229.8	2554.77	1794.79	1754.45	1567.55		2410.91	0.238598	1.17985	0.139377	1.71189	0.086917	0.219453		2410.91	0.253762	1.19231	0.139535	1.81862	0.0689689	0.131036		2410.91	0.167222	1.12289	0.13944	1.19924	0.230433	0.353735		2410.91	-0.461694	0.726133	0.139739	-3.30399	0.000953205	0.00330193
B0285.6	B0285.6	4.76638	13.8437	14.1297	7.14903	9.30732	14.6189	10.0051	13.214	11.6328	11.1304	11.705	14.7846	8.34399	4.25013	17.0757		10.8495	0.0893263	1.06387	0.531568	0.168043	0.866549	NA		10.8495	-0.0727719	0.950809	0.549575	-0.132415	0.894656	0.929953		10.8495	0.198426	1.14745	0.528624	0.375363	0.70739	NA		10.8495	-0.145737	0.903917	0.532953	-0.273452	0.784506	0.844297
B0285.7	mnp-1	3973.26	5614.07	7581.05	13887	12552.1	11166.6	6713.41	3917.94	5647.71	6598.27	3612.94	4689.66	4516.6	4509.39	4302.22		7086.05	-0.0767748	0.948175	0.237373	-0.323436	0.746365	0.848006		7086.05	1.13118	2.19038	0.237247	4.76797	1.86096e-06	1.54381e-05		7086.05	-0.20439	0.867905	0.237403	-0.860943	0.38927	0.516822		7086.05	-0.365276	0.77632	0.23739	-1.53872	0.123873	0.202053
B0285.8	ckb-1	96.281	97.8286	103.618	133.449	127.976	120.325	141.072	110.431	133.777	129.517	163.87	120.248	133.504	116.454	107.577		120.641	0.370769	1.29304	0.178555	2.07649	0.0378482	0.130205		120.641	0.358061	1.2817	0.18154	1.97236	0.0485688	0.0982474		120.641	0.474919	1.38984	0.177809	2.67095	0.00756367	0.0281055		120.641	0.264498	1.20122	0.177639	1.48896	0.136497	0.218514
B0285.9	ckb-2	364.152	340.554	246.799	346.728	239.663	285.631	470.239	481.365	474.035	433.072	572.569	478.034	210.269	249.058	210.031		323.362	0.583375	1.49835	0.174309	3.3468	0.000817511	0.00977554		323.362	-0.126257	0.916205	0.178142	-0.708746	0.478482	0.599178		323.362	0.641131	1.55955	0.174228	3.67983	0.000233386	0.00216147		323.362	-0.50748	0.70345	0.177754	-2.85496	0.00430429	0.0119765
B0286.1	B0286.1	758.808	690.338	806.335	780.436	808.573	835.527	1029.52	1189.26	1125.47	878.286	1120.75	1055.62	1021.3	1020.88	953.678		872.897	0.568555	1.48304	0.113324	5.01705	5.24703e-07	4.90581e-05		872.897	0.104528	1.07514	0.115037	0.908644	0.363538	0.488453		872.897	0.437926	1.35466	0.113636	3.85376	0.000116316	0.00135458		872.897	0.409678	1.32839	0.113251	3.61742	0.00029755	0.00121493
B0286.2	lat-2	149.664	190.12	374.908	253.791	373.456	350.854	128.065	118.926	95.9704	122.434	103.394	129.118	254.492	313.659	285.164		258.911	-1.05951	0.479796	0.264471	-4.00614	6.17201e-05	0.00157293		258.911	0.45293	1.36882	0.25791	1.75616	0.0790618	0.146505		258.911	-1.00991	0.496579	0.264313	-3.82086	0.000132985	0.00148422		258.911	0.255684	1.1939	0.257126	0.99439	0.320033	0.427566
B0286.3	paic-1	188.749	189.197	251.509	243.067	264.095	292.378	218.111	250.121	214.237	222.607	327.74	239.51	284.53	291.559	319.316		235.724	0.11712	1.08457	0.172596	0.678583	0.497402	0.666577		235.724	0.345675	1.27075	0.17276	2.0009	0.0454036	0.0931415		235.724	0.328142	1.2554	0.171576	1.91252	0.05581	0.123975		235.724	0.508438	1.42251	0.169691	2.99626	0.00273315	0.00813485
B0286.4	ntl-2	5902.69	6491.76	6672.04	8244.02	8093.88	7492.76	6738.42	5056.22	6251.64	6218.83	5206.77	5403.26	4559.99	4852.8	4931.46		6149.95	-0.0794091	0.946445	0.117384	-0.676489	0.49873	0.667778		6149.95	0.32175	1.24985	0.117339	2.74207	0.00610538	0.0175927		6149.95	-0.180142	0.882616	0.117429	-1.53405	0.125019	0.224824		6149.95	-0.410584	0.752319	0.11743	-3.49642	0.000471547	0.00179596
B0286.5	fkh-6	212.581	196.58	259.986	243.067	279.22	267.639	302.153	351.114	306.33	247.903	343.346	301.605	310.396	283.059	280.895		265.027	0.52071	1.43466	0.152992	3.4035	0.00066528	0.0083585		265.027	0.239896	1.18091	0.156063	1.53717	0.124252	0.210907		265.027	0.416896	1.33505	0.153655	2.7132	0.00666375	0.025509		265.027	0.386221	1.30697	0.152691	2.52942	0.011425	0.0275855
B0286.6	try-9	8.57949	12.9208	7.53584	8.34053	16.2878	10.1208	6.00305	6.60698	5.81639	7.08295	9.75416	4.92819	10.0128	8.50026	14.5143		9.93791	-0.657336	0.634048	0.539724	-1.21791	0.223258	NA		9.93791	0.257624	1.19551	0.501117	0.5141	0.607182	0.711883		9.93791	-0.416683	0.749145	0.525706	-0.792615	0.428002	NA		9.93791	0.18297	1.13522	0.484813	0.377404	0.705874	0.782211
B0294.1	B0294.1	4.76638	4.61456	5.65188	2.38301	2.32683	12.3699	6.00305	4.71927	1.9388	9.10665	8.77874	5.91382	5.0064	12.7504	4.26893		18.8638	-0.250847	0.840403	0.646127	-0.388232	0.697844	0.816267		18.8638	0.202175	1.15043	0.630126	0.320849	0.748325	0.824744		18.8638	0.662368	1.58268	0.586681	1.12901	0.258894	NA		18.8638	0.550322	1.46441	0.58095	0.947279	0.343497	0.452827
B0294.3	B0294.3	0.953277	1.84582	5.65188	0	0	1.12453	1.00051	3.77542	0	1.01185	2.92625	0.985637	0	1.70005	2.56136		1.94615	-0.811349	0.569849	1.18836	-0.682746	0.494767	NA		1.94615	-2.76172	0.147449	1.54278	-1.79009	0.0734395	NA		1.94615	-0.774945	0.584411	1.18748	-0.652595	0.514017	NA		1.94615	-0.993498	0.502258	1.18634	-0.837446	0.402342	NA
B0302.1	sid-3	1815.99	2478.94	4227.6	5615.56	5586.72	5066.02	2319.18	1162.83	1914.56	2061.14	1150.02	1578.01	2045.95	2359.67	2231.79		3185.16	-0.659336	0.633169	0.272613	-2.41858	0.0155811	0.0747659		3185.16	0.932697	1.90884	0.272198	3.42655	0.000611311	0.00243807		3185.16	-0.831575	0.561916	0.272716	-3.04924	0.00229423	0.0115351		3185.16	-0.360672	0.778802	0.272412	-1.32399	0.185505	0.279194
B0302.2	B0302.2	2.85983	11.9978	20.7236	5.95752	8.1439	5.62266	10.0051	2.83156	4.84699	4.0474	3.90166	4.92819	2.5032	4.25013	3.41514		7.02203	-1.01847	0.493641	0.644212	-1.58095	0.11389	NA		7.02203	-0.853187	0.553561	0.649975	-1.31265	0.189302	0.29491		7.02203	-1.46753	0.361602	0.678374	-2.1633	0.030518	NA		7.02203	-1.80978	0.285235	0.688037	-2.63035	0.00852975	0.0215276
B0302.4	B0302.4	6.67294	11.0749	16.0137	19.0641	13.961	7.87172	7.00356	12.2701	12.6022	6.0711	7.80333	5.91382	9.17839	4.25013	6.83028		11.3899	-0.0803348	0.945838	0.493027	-0.162942	0.870564	0.927985		11.3899	0.26988	1.20571	0.488956	0.551952	0.580981	0.690055		11.3899	-0.770584	0.58618	0.532882	-1.44607	0.148158	NA		11.3899	-0.736023	0.600392	0.516374	-1.42537	0.154051	0.240565
B0302.5	B0302.5	324.114	296.254	389.98	418.218	504.922	620.742	221.112	371.878	330.565	272.188	313.109	334.131	442.232	482.815	424.331		407.434	-0.128669	0.914675	0.19292	-0.666956	0.5048	0.672655		407.434	0.612285	1.52868	0.191294	3.20075	0.00137071	0.00489172		407.434	-0.135762	0.910189	0.193063	-0.703201	0.48193	0.60297		407.434	0.41754	1.33565	0.190619	2.19044	0.0284922	0.0594465
B0302.7	B0302.7	0	0.922911	0.94198	1.1915	1.16341	0	0	0	3.87759	0	4.87708	0.985637	0	0	1.70757		1.21826	1.05117	2.07221	1.79569	0.585386	0.558288	NA		1.21826	0.318325	1.24688	1.93319	0.164662	0.86921	NA		1.21826	1.65259	3.14398	1.74755	0.945664	0.34432	NA		1.21826	-0.140315	0.907321	1.93393	-0.0725545	0.942161	NA
B0303.11	B0303.11	147.758	169.816	285.42	183.492	222.212	226.031	111.056	94.3854	96.9398	99.1613	74.1316	122.219	186.071	216.757	254.428		198.463	-0.996307	0.501282	0.236546	-4.2119	2.53236e-05	0.000829959		198.463	0.067557	1.04794	0.230406	0.293209	0.769363	0.840953		198.463	-1.02923	0.48997	0.237166	-4.33972	1.42665e-05	0.000323405		198.463	0.124135	1.08985	0.227918	0.544648	0.585995	0.680187
B0303.14	B0303.14	456.62	506.678	419.181	461.112	465.366	426.198	526.267	359.608	451.739	558.541	555.987	483.948	191.912	227.807	193.809		434.662	-0.0484764	0.966957	0.145413	-0.333371	0.738854	0.843399		434.662	-0.0317674	0.978221	0.146348	-0.217068	0.828155	0.883123		434.662	0.209253	1.15609	0.144649	1.44663	0.148002	0.255221		434.662	-1.1723	0.443714	0.150011	-7.81474	5.50759e-15	4.10605e-13
B0303.15	mrpl-11	2465.17	1773.84	1314.06	1423.85	1346.07	1467.51	1843.94	2964.64	2453.55	2154.23	2285.4	2534.07	1890.75	1729.8	1736.6		1803.29	0.387244	1.30789	0.195473	1.98106	0.0475849	0.150519		1803.29	-0.390037	0.76311	0.196217	-1.98778	0.046836	0.0954349		1803.29	0.328695	1.25588	0.195518	1.68115	0.0927342	0.180391		1803.29	-0.0517675	0.964754	0.195602	-0.264657	0.791274	0.848906
B0303.16	B0303.16	4.76638	0.922911	1.88396	2.38301	1.16341	0	0	3.77542	1.9388	1.01185	0.975416	3.94255	4.172	3.4001	2.56136		2.4063	-0.384778	0.765897	1.06108	-0.362627	0.716883	NA		2.4063	-1.10939	0.463489	1.2109	-0.916173	0.359576	NA		2.4063	-0.345174	0.787213	1.0599	-0.325665	0.744678	NA		2.4063	0.426873	1.34432	0.974558	0.438017	0.661374	NA
B0303.2	anmt-1	794.08	626.657	595.331	539.752	566.583	540.9	685.348	1076.94	839.498	713.354	974.441	911.715	1034.65	953.729	896.475		738.261	0.368406	1.29093	0.171009	2.1543	0.0312164	0.115172		738.261	-0.29139	0.817115	0.173011	-1.68423	0.092138	0.165837		738.261	0.366964	1.28964	0.171058	2.14527	0.0319316	0.0818663		738.261	0.517104	1.43108	0.170522	3.03247	0.00242558	0.00736118
B0303.3	B0303.3	4323.11	4560.1	4165.43	5206.88	4796.76	4813	5932.01	4522.95	5167.86	5947.66	6715.74	4912.42	4022.64	3990.02	4008.52		4858.88	0.25968	1.19721	0.124127	2.09205	0.0364341	0.127119		4858.88	0.183285	1.13547	0.124262	1.47499	0.140216	0.232935		4858.88	0.429689	1.34694	0.124079	3.46304	0.000534117	0.00395136		4858.88	-0.118331	0.921253	0.124196	-0.952777	0.340703	0.449703
B0303.4	B0303.4	1872.24	2033.17	2240.03	2856.04	2743.33	2491.96	2215.12	1107.14	1833.13	2251.37	1386.07	1769.22	1395.95	1521.55	1323.37		2011.14	-0.253601	0.8388	0.207965	-1.21944	0.222678	0.401042		2011.14	0.396829	1.31661	0.20774	1.91022	0.0561046	0.110776		2011.14	-0.184863	0.879733	0.20794	-0.88902	0.373992	0.501795		2011.14	-0.535164	0.69008	0.208021	-2.57264	0.0100925	0.0248554
B0303.7	B0303.7	788.36	820.468	893.939	979.417	878.378	860.267	847.43	552.154	696.997	826.682	740.341	723.458	759.303	741.222	814.511		812.365	-0.256038	0.837385	0.144787	-1.76837	0.0769987	0.20362		812.365	0.118894	1.0859	0.144523	0.822664	0.410699	0.535358		812.365	-0.127989	0.915106	0.144566	-0.88533	0.375979	0.503904		812.365	-0.11252	0.924971	0.144082	-0.780944	0.434835	0.542483
B0303.8	sdz-1	472.825	348.86	268.464	183.492	138.446	151.812	380.193	428.51	424.596	473.546	408.699	471.135	247.817	186.156	186.125		297.089	0.178362	1.1316	0.189658	0.940442	0.346991	0.533617		297.089	-1.20271	0.434457	0.198565	-6.05702	1.38663e-09	2.6335e-08		297.089	0.312157	1.24156	0.189355	1.64853	0.0992438	0.189413		297.089	-0.813454	0.569018	0.192796	-4.21924	2.45125e-05	0.000140955
B0303.9	vps-33.1	394.657	407.927	331.577	386.048	343.207	320.492	451.229	377.542	408.116	441.167	422.355	424.81	366.301	343.41	379.081		374.706	0.124468	1.09011	0.12736	0.977297	0.328422	0.512983		374.706	-0.112368	0.925069	0.129947	-0.864723	0.387191	0.512376		374.706	0.183684	1.13578	0.127227	1.44375	0.14881	0.256207		374.706	-0.0590083	0.959924	0.127292	-0.463568	0.642957	0.728939
B0304.1	hlh-1	1417.52	1278.23	1234.94	1738.41	1588.06	1690.17	1966	1757.46	1879.66	1942.75	2537.06	1921.01	1166.49	1331.14	1124.44		1581.83	0.511421	1.42545	0.128657	3.97508	7.03568e-05	0.00173782		1581.83	0.351964	1.2763	0.129124	2.72579	0.00641484	0.0183044		1581.83	0.703597	1.62856	0.128507	5.47518	4.37072e-08	5.25533e-06		1581.83	-0.117937	0.921505	0.129143	-0.913224	0.361125	0.470465
B0304.10	B0304.10	18.1123	18.4582	16.0137	13.1066	20.9415	12.3699	13.0066	21.7086	14.541	12.1422	16.5821	18.7271	29.204	28.9009	35.859		19.0628	-0.0904155	0.939252	0.377106	-0.239762	0.810515	0.890124		19.0628	-0.181079	0.882043	0.391559	-0.462455	0.643755	0.742623		19.0628	-0.146532	0.903419	0.380398	-0.385208	0.700083	NA		19.0628	0.836964	1.78629	0.34647	2.41569	0.0157054	0.0359979
B0304.2	B0304.2	1818.85	1082.57	646.198	848.352	674.781	834.403	1287.65	1574.35	1543.28	1429.74	1499.21	1520.84	660.01	628.169	559.229		1020.23	0.312495	1.24185	0.24606	1.26999	0.204087	0.378934		1020.23	-0.589501	0.664573	0.247206	-2.38465	0.0170952	0.0417927		1020.23	0.326965	1.25437	0.24607	1.32875	0.183931	0.298965		1020.23	-0.941254	0.52078	0.247063	-3.80977	0.000139094	0.000628334
B0304.3	cyp-23A1	224.02	205.809	230.785	208.513	236.173	275.51	205.104	282.212	213.267	177.074	228.247	235.567	412.193	439.463	406.402		265.246	0.0858493	1.06131	0.166489	0.515645	0.606102	0.750027		265.246	0.125658	1.09101	0.167883	0.748489	0.454165	0.576069		265.246	-0.0430071	0.97063	0.167488	-0.256777	0.797351	0.861399		265.246	0.929466	1.90457	0.161973	5.73842	9.55656e-09	1.48485e-07
B0304.4	B0304.4	718.771	514.062	310.853	299.068	264.095	333.986	477.242	765.465	650.466	520.091	505.266	642.636	365.467	325.56	318.462		429.032	0.294778	1.2267	0.236719	1.24527	0.213034	0.390267		429.032	-0.782684	0.581284	0.240122	-3.25953	0.00111597	0.00409652		429.032	0.111853	1.08062	0.237075	0.471804	0.637067	0.734973		429.032	-0.612597	0.654018	0.238144	-2.57238	0.0101001	0.024867
B0304.5	sra-32	4.76638	9.22911	1.88396	5.95752	6.98049	7.87172	8.00406	2.83156	6.78578	3.03555	8.77874	10.842	2.5032	5.10015	5.12271		5.91085	0.140107	1.10199	0.687498	0.203793	0.838516	NA		5.91085	0.387969	1.30855	0.687971	0.563933	0.5728	0.683287		5.91085	0.512371	1.42639	0.669539	0.765259	0.444118	NA		5.91085	-0.325622	0.797954	0.70432	-0.462321	0.643851	0.72971
B0304.6	sra-33	61.0097	58.1434	37.6792	42.8942	53.5171	37.1096	56.0284	107.599	77.5518	72.8532	72.1808	66.0377	40.8856	35.7011	25.6136		55.0435	0.622836	1.5399	0.281435	2.21307	0.0268927	0.10465		55.0435	-0.233077	0.850818	0.2982	-0.781612	0.434443	0.558428		55.0435	0.428388	1.34573	0.283916	1.50885	0.131336	0.232846		55.0435	-0.617009	0.652021	0.296743	-2.07927	0.0375924	0.0749642
B0304.7	sra-34	2.85983	1.84582	0	0	2.32683	3.3736	0	5.66312	2.90819	3.03555	3.90166	0	5.84079	4.25013	5.9765		2.74006	0.879043	1.83915	1.11555	0.787987	0.430704	NA		2.74006	0.292467	1.22473	1.19578	0.244583	0.80678	NA		2.74006	0.561444	1.47575	1.14367	0.490914	0.623488	NA		2.74006	1.77356	3.41895	1.05841	1.67567	0.0938024	NA
B0304.8	sra-35	10.486	4.61456	2.82594	4.76602	4.65366	3.3736	6.00305	7.55083	11.6328	4.0474	6.82791	2.95691	8.34399	2.55008	1.70757		5.15845	0.494507	1.40884	0.689715	0.716974	0.47339	NA		5.15845	-0.48658	0.713715	0.764533	-0.636441	0.524489	0.640894		5.15845	-0.369203	0.77421	0.73784	-0.500384	0.616805	NA		5.15845	-0.500686	0.706771	0.731285	-0.684666	0.493555	0.597624
B0304.9	sra-36	8.57949	5.53747	2.82594	3.57451	1.16341	3.3736	0	1.88771	3.87759	4.0474	2.92625	0	5.0064	5.95018	6.83028		4.01231	-1.54396	0.342944	0.896184	-1.72281	0.0849225	NA		4.01231	-1.06111	0.479265	0.867468	-1.22322	0.221246	NA		4.01231	-1.28453	0.410505	0.867078	-1.48144	0.138488	NA		4.01231	0.0707858	1.05029	0.744379	0.0950937	0.92424	NA
B0310.1	B0310.1	235.459	223.345	395.631	331.238	411.849	380.092	201.102	268.998	233.625	212.489	227.272	223.74	348.779	389.312	386.765		295.085	-0.279216	0.824039	0.194423	-1.43613	0.150965	0.312512		295.085	0.394865	1.31482	0.192556	2.05065	0.040301	0.0843298		295.085	-0.364636	0.776665	0.195032	-1.86963	0.0615355	0.133655		295.085	0.396773	1.31656	0.191036	2.07696	0.0378056	0.0753188
B0310.10	B0310.10	0	0	0	0	0	0	0	0	0	0	0	0	0	0	0		0.115075	0	1	5.2679	0	1	NA		0.115075	0	1	5.2679	0	1	NA		0.115075	0	1	5.26765	0	1	NA		0.115075	0	1	5.2679	0	1	NA
B0310.11	B0310.11	0	0.922911	5.65188	1.1915	2.32683	1.12453	5.00254	0	3.87759	3.03555	0.975416	1.97127	0.834399	0	0.853785		1.71625	0.426324	1.3438	1.23902	0.34408	0.730786	NA		1.71625	-0.502881	0.705696	1.3515	-0.372092	0.709824	NA		1.71625	-0.140013	0.907511	1.28532	-0.108932	0.913256	NA		1.71625	-1.95933	0.257149	1.53229	-1.27869	0.201005	NA
B0310.12	B0310.12	0	0	0	0	0	0	0	0	0	0	0	0	0	0	0		0.115075	0	1	5.2679	0	1	NA		0.115075	0	1	5.2679	0	1	NA		0.115075	0	1	5.26765	0	1	NA		0.115075	0	1	5.2679	0	1	NA
B0310.2	B0310.2	921.819	1083.5	1239.65	2069.64	2015.03	1840.86	1248.63	722.992	1017.87	1214.22	1052.47	929.456	672.526	679.17	601.065		1261.73	-0.118661	0.921042	0.174755	-0.67901	0.497131	0.666457		1261.73	0.868665	1.82597	0.173984	4.99279	5.95132e-07	5.5859e-06		1261.73	-0.0219785	0.984881	0.174666	-0.125831	0.899866	0.933509		1261.73	-0.732694	0.601779	0.175399	-4.1773	2.9499e-05	0.000165159
B0310.3	B0310.3	8.57949	5.53747	12.2457	5.95752	1.16341	8.99626	12.0061	5.66312	3.87759	7.08295	10.7296	0.985637	5.0064	1.70005	7.68407		5.92104	-0.294233	0.815506	0.753424	-0.390528	0.696146	NA		5.92104	-0.704785	0.613534	0.78923	-0.893004	0.371855	0.49701		5.92104	-0.486284	0.713861	0.763697	-0.63675	0.524288	NA		5.92104	-0.872772	0.546096	0.77199	-1.13055	0.258245	0.362191
B0310.5	ugt-46	697.799	788.166	995.672	1068.78	1213.44	1094.17	746.379	768.297	779.396	783.172	838.858	813.151	1420.98	1573.4	1523.15		932.63	-0.113379	0.92442	0.126397	-0.897009	0.369714	0.55561		932.63	0.444158	1.36052	0.125737	3.53243	0.000411766	0.00173076		932.63	-0.0272426	0.981294	0.126261	-0.215763	0.829172	0.884434		932.63	0.864172	1.82029	0.124438	6.9446	3.79536e-12	1.45958e-10
B0310.6	B0310.6	49.5704	59.0663	43.3311	14.2981	19.7781	10.1208	31.0157	78.3399	25.2043	52.6162	49.7462	52.2388	61.7455	45.9014	75.9869		43.8342	-0.172545	0.887276	0.3544	-0.486865	0.626354	0.765242		43.8342	-1.78464	0.290248	0.406585	-4.38934	1.13696e-05	7.5345e-05		43.8342	0.024327	1.01701	0.352071	0.0690969	0.944913	0.96477		43.8342	0.27263	1.20801	0.346703	0.786352	0.431661	0.539474
B0310.8	B0310.8	0	1.84582	0	0	1.16341	1.12453	0	0	0	0	0	0	0	0	0		0.461804	-1.79199	0.288774	2.72651	-0.657247	0.511022	NA		0.461804	0.307973	1.23797	2.66403	0.115604	0.907966	NA		0.461804	-1.76273	0.294691	2.72647	-0.646523	0.517941	NA		0.461804	-1.99072	0.251613	2.72651	-0.730135	0.465308	NA
B0331.1	cyp-29A4	18.1123	10.152	26.3754	1.1915	2.32683	2.24906	3.00152	4.71927	0.969398	3.03555	2.92625	2.95691	5.0064	4.25013	3.41514		5.67938	-2.64628	0.159732	0.696601	-3.79884	0.000145373	NA		5.67938	-3.23726	0.106045	0.818713	-3.95408	7.68301e-05	0.000397673		5.67938	-2.61421	0.163322	0.696283	-3.75452	0.000173672	NA		5.67938	-2.10612	0.23227	0.626418	-3.36217	0.000773327	0.00275346
B0331.2	pitr-4	13.3459	4.61456	4.7099	9.53204	6.98049	3.3736	9.00457	9.43854	11.6328	6.0711	10.7296	6.89946	20.86	13.6004	8.53785		8.84277	0.412286	1.33079	0.570266	0.722971	0.469698	NA		8.84277	-0.192597	0.875029	0.616459	-0.312425	0.754717	0.829691		8.84277	0.0705949	1.05015	0.587279	0.120207	0.904319	NA		8.84277	0.929193	1.90421	0.546746	1.6995	0.0892255	0.154257
B0334.1	ttr-18	234.506	238.111	222.307	308.6	360.659	311.495	161.082	384.148	252.043	203.382	226.297	299.634	330.422	368.911	362.005		320.004	0.19927	1.14812	0.235785	0.845137	0.398035	0.581202		320.004	0.497004	1.41128	0.235631	2.10925	0.0349232	0.0751044		320.004	0.069835	1.0496	0.236407	0.295401	0.767687	0.84065		320.004	0.610897	1.52721	0.233923	2.61153	0.00901388	0.0225486
B0334.10	B0334.10	6.67294	2.76873	3.76792	3.57451	4.65366	5.62266	4.00203	2.83156	3.87759	4.0474	0.975416	1.97127	1.6688	3.4001	5.12271		3.75155	-0.301605	0.811349	0.771651	-0.390857	0.695903	NA		3.75155	0.0754509	1.05369	0.76173	0.0990521	0.921097	NA		3.75155	-0.922358	0.527646	0.838465	-1.10005	0.271308	NA		3.75155	-0.37389	0.771699	0.761309	-0.491114	0.623346	NA
B0334.11	ooc-3	1456.61	1337.3	874.157	872.182	872.561	809.663	1586.81	1109.03	1551.04	1608.84	1785.01	1370.04	745.953	799.024	674.49		1125.39	0.211257	1.1577	0.183544	1.15099	0.249737	0.430883		1125.39	-0.522083	0.696365	0.184817	-2.82486	0.0047301	0.0141504		1125.39	0.377139	1.29876	0.183427	2.05607	0.0397754	0.096645		1125.39	-0.724787	0.605087	0.184407	-3.93037	8.48148e-05	0.000412145
B0334.13	B0334.13	275.497	263.03	229.843	96.5119	133.793	119.2	154.078	422.847	189.033	216.536	289.699	252.323	166.88	173.405	195.517		199.613	-0.00352744	0.997558	0.275802	-0.0127898	0.989796	0.99607		199.613	-1.13609	0.454991	0.283432	-4.00834	6.11478e-05	0.000326647		199.613	-0.0183491	0.987362	0.275949	-0.0664946	0.946984	0.966075		199.613	-0.520156	0.697296	0.276976	-1.87798	0.060384	0.111675
B0334.14	21ur-12490	0	0	0	1.1915	0	0	0	0	0	0	0	0	0	0	0		0.0661947	0	1	5.2679	0	1	NA		0.0661947	1.2656	2.40428	5.2679	0.240248	0.810138	NA		0.0661947	0	1	5.26765	0	1	NA		0.0661947	0	1	5.2679	0	1	NA
B0334.15	emc-5	2538.58	2026.71	2140.18	3417.24	2973.69	3238.65	2492.27	2145.38	2736.61	2881.75	2502.92	2758.8	1832.34	1849.66	1711.84		2465.36	0.137158	1.09974	0.120448	1.13873	0.254814	0.435795		2465.36	0.522181	1.43613	0.120351	4.33883	1.4324e-05	9.22273e-05		2465.36	0.280332	1.21447	0.120361	2.32909	0.0198546	0.057961		2465.36	-0.313946	0.804438	0.120665	-2.6018	0.00927368	0.0231028
B0334.16	B0334.16	0	0	0	0	0	0	0	0	0	0	0	0	0	0	0		0.0578846	0	1	5.2679	0	1	NA		0.0578846	0	1	5.2679	0	1	NA		0.0578846	0	1	5.26765	0	1	NA		0.0578846	0	1	5.2679	0	1	NA
B0334.17	B0334.17	0.953277	1.84582	0.94198	0	0	1.12453	0	0	0	0	0	0.985637	0.834399	0.850026	0		0.418649	-2.80493	0.143098	2.4273	-1.15557	0.247856	NA		0.418649	-1.58715	0.332828	2.4273	-0.653875	0.513193	NA		0.418649	-1.8139	0.284421	2.42727	-0.747298	0.454883	NA		0.418649	-1.15024	0.450552	2.35543	-0.488334	0.625313	NA
B0334.19	B0334.19	0	0	0.94198	0	0	2.24906	0	0	0	0	0	0.985637	0	0	0		0.289922	-0.913946	0.530731	3.94226	-0.231833	0.816668	NA		0.289922	1.16188	2.23748	3.9016	0.297795	0.765859	NA		0.289922	0.0770742	1.05488	3.94215	0.0195513	0.984401	NA		0.289922	-1.11268	0.462435	3.94226	-0.282243	0.777757	NA
B0334.2	twk-5	9.53277	17.5353	24.4915	4.76602	9.30732	11.2453	8.00406	15.1017	11.6328	11.1304	12.6804	13.7989	10.8472	13.6004	17.0757		12.5579	-0.566894	0.675069	0.496808	-1.14107	0.25384	0.434909		12.5579	-1.02116	0.492719	0.532656	-1.91711	0.0552235	0.109252		12.5579	-0.455438	0.729289	0.493561	-0.92276	0.356132	NA		12.5579	-0.314114	0.804345	0.480857	-0.653237	0.513603	0.615889
B0334.20	B0334.20	0	0	0	0	0	0	2.00102	0.943854	0	0	0	0	0	0	0		0.163604	2.50538	5.67798	5.20097	0.481713	0.63001	NA		0.163604	0	1	5.2679	0	1	NA		0.163604	0	1	5.26765	0	1	NA		0.163604	0	1	5.2679	0	1	NA
B0334.3	B0334.3	2985.66	3196.04	3085.93	3724.64	3537.94	3292.63	3071.56	2383.23	2922.73	3092.21	2720.44	2668.12	2665.91	2805.08	2792.73		3089.3	-0.145838	0.903854	0.107189	-1.36057	0.17365	0.340552		3089.3	0.187596	1.13886	0.107131	1.7511	0.0799289	0.147886		3089.3	-0.128083	0.915046	0.107198	-1.19483	0.232155	0.355459		3089.3	-0.16544	0.891656	0.107058	-1.54534	0.122265	0.200025
B0334.4	B0334.4	5618.61	4034.97	2736.45	4369.25	4019.6	4432.9	4405.24	6655.11	5655.47	4998.54	5095.57	6001.55	3357.62	2779.58	2476.83		4307.26	0.43208	1.34918	0.212695	2.03145	0.0422089	0.13917		4307.26	0.0494322	1.03486	0.212853	0.232236	0.816355	0.873938		4307.26	0.377511	1.2991	0.212712	1.77475	0.0759388	0.156162		4307.26	-0.524386	0.695255	0.212891	-2.46317	0.0137716	0.0322882
B0334.5	B0334.5	1752.12	1694.46	1785.05	2833.4	2559.51	2604.42	1866.95	1443.15	1809.87	1952.87	1776.23	1821.46	1355.06	1377.04	1383.99		1874.43	-0.031357	0.9785	0.103742	-0.30226	0.762454	0.858373		1874.43	0.612213	1.5286	0.103292	5.927	3.08526e-09	5.40652e-08		1874.43	0.0853291	1.06093	0.103629	0.823406	0.410277	0.536568		1874.43	-0.345977	0.786775	0.1039	-3.32989	0.000868792	0.00304552
B0334.6	B0334.6	159.197	202.118	216.655	190.641	215.232	219.284	147.075	216.143	171.583	108.268	196.059	169.53	315.403	339.16	280.042		212.6	-0.111274	0.92577	0.204677	-0.543656	0.586678	0.735014		212.6	0.113314	1.08171	0.20488	0.553073	0.580213	0.689572		212.6	-0.285748	0.820316	0.206071	-1.38665	0.165548	0.276629		212.6	0.693152	1.61681	0.2	3.46576	0.000528731	0.00197698
B0334.7	srh-44	1.90655	0.922911	2.82594	0	0	0	0	0.943854	0.969398	2.0237	0.975416	0.985637	1.6688	0.850026	0.853785		1.06207	-1.54708	0.342201	1.54137	-1.00371	0.315519	NA		1.06207	-3.14177	0.113301	1.64855	-1.90578	0.0566787	NA		1.06207	-0.507125	0.703623	1.35983	-0.372933	0.709198	NA		1.06207	-0.741181	0.59825	1.36064	-0.544729	0.58594	NA
B0334.8	age-1	920.866	1366.83	1535.43	1517.98	1484.52	1326.95	1290.66	667.305	1129.35	1043.22	573.545	880.174	739.278	722.522	714.618		1110.06	-0.308637	0.807404	0.238313	-1.29509	0.195289	0.36825		1110.06	0.17935	1.13237	0.238108	0.753229	0.451313	0.573821		1110.06	-0.614772	0.653033	0.238672	-2.57581	0.0100006	0.0345778		1110.06	-0.812832	0.569263	0.238636	-3.40616	0.000658836	0.00239446
B0334.9	B0334.9	0.953277	0.922911	0	0	0	0	1.00051	0	0	1.01185	0	0.985637	0	0.850026	0.853785		0.365444	-0.846745	0.556038	2.64493	-0.320138	0.748863	NA		0.365444	-1.55256	0.340905	2.64493	-0.586993	0.557208	NA		0.365444	0.086237	1.0616	2.57741	0.0334588	0.973309	NA		0.365444	-0.142673	0.905839	2.57757	-0.0553518	0.955858	NA
B0336.1	wrm-1	1783.58	2179.92	2371.9	4329.93	3955.61	3560.27	2636.34	1914.14	2569.87	2319.16	1642.6	1996.9	1563.66	1768.05	1429.24		2517.84	0.168395	1.12381	0.163514	1.02985	0.303079	0.488103		2517.84	0.902799	1.86969	0.163268	5.52954	3.2107e-08	4.3211e-07		2517.84	-0.0885529	0.940466	0.163704	-0.540934	0.588553	0.694553		2517.84	-0.412211	0.751471	0.163776	-2.51692	0.0118386	0.0283946
B0336.10	rpl-23	14262.9	10949.4	6185.98	4374.01	4609.45	4333.95	8942.54	20739.3	15128.4	12456.9	14181.6	17468.5	17707.6	15560.6	17853.5		10859.8	0.513158	1.42717	0.268389	1.91199	0.055877	0.166691		10859.8	-1.23737	0.424144	0.268643	-4.60602	4.10452e-06	3.08165e-05		10859.8	0.490321	1.40476	0.268392	1.82689	0.067717	0.143362		10859.8	0.703251	1.62817	0.268369	2.62046	0.00878109	0.0220572
B0336.11	hpo-28	382.264	427.308	556.71	629.115	715.5	743.316	373.189	314.303	308.268	335.934	422.355	290.763	573.232	646.869	604.48		502.268	-0.456791	0.728605	0.165865	-2.75399	0.00588741	0.0388789		502.268	0.611978	1.52835	0.163208	3.74969	0.000177054	0.000833676		502.268	-0.380988	0.767912	0.16567	-2.29968	0.0214666	0.0612559		502.268	0.417239	1.33537	0.162622	2.5657	0.0102969	0.0252563
B0336.12	B0336.12	7.62622	2.76873	6.59386	7.14903	0	5.62266	4.00203	6.60698	7.75518	8.0948	7.80333	4.92819	9.17839	3.4001	6.83028		5.65913	0.118427	1.08555	0.699851	0.169218	0.865625	NA		5.65913	-0.409847	0.752703	0.754388	-0.543284	0.586934	0.694612		5.65913	0.296459	1.22813	0.692117	0.428337	0.668406	NA		5.65913	0.196863	1.1462	0.685997	0.286973	0.774133	0.836965
B0336.13	B0336.13	3596.71	2539.85	1531.66	1473.89	1207.62	1348.31	2581.31	4118.03	3480.14	3026.44	3181.81	3475.36	1760.58	1585.3	1474.49		2174.02	0.408771	1.32755	0.230491	1.77348	0.07615	0.20253		2174.02	-0.928174	0.525523	0.231358	-4.01185	6.02456e-05	0.000322842		2174.02	0.336681	1.26285	0.230523	1.46051	0.14415	0.249981		2174.02	-0.669712	0.628632	0.230853	-2.90104	0.0037193	0.0105773
B0336.14	B0336.14	0	0	0	0	0	0	0	0	0	0	0	0	0	0	0		0.114381	0	1	5.2679	0	1	NA		0.114381	0	1	5.2679	0	1	NA		0.114381	0	1	5.26765	0	1	NA		0.114381	0	1	5.2679	0	1	NA
B0336.15	B0336.15	0	0	0	0	0	0	0	0	0	0	0	0	0	0	0		0.114381	0	1	5.2679	0	1	NA		0.114381	0	1	5.2679	0	1	NA		0.114381	0	1	5.26765	0	1	NA		0.114381	0	1	5.2679	0	1	NA
B0336.16	B0336.16	0	0	1.88396	1.1915	1.16341	1.12453	1.00051	2.83156	0	2.0237	3.90166	0.985637	2.5032	0	0		1.20814	1.03618	2.05079	1.63705	0.632956	0.526762	NA		1.20814	0.887336	1.84976	1.68809	0.525645	0.599135	NA		1.20814	1.87955	3.67961	1.5665	1.19985	0.230199	NA		1.20814	0.423757	1.34142	1.68936	0.250838	0.801939	NA
B0336.2	arf-1	17771.9	17587	17826	37732.6	36945.4	36448.3	23685	17225.3	20719.9	25829.5	28525.1	20556.5	17394.7	18252.6	17606.8		24597.5	0.212604	1.15878	0.130741	1.62614	0.103919	0.24616		24597.5	1.06311	2.08943	0.130699	8.13404	4.15208e-16	2.89251e-14		24597.5	0.494161	1.4085	0.130721	3.78027	0.000156658	0.00164713		24597.5	0.00187346	1.0013	0.130742	0.0143294	0.988567	0.992362
B0336.3	rbm-26	4137.22	5317.81	7029.99	8128.45	7697.15	7247.61	5731.91	2874.98	4437.9	5229.24	2834.56	4017.46	3547.03	3656.81	3488.57		5251.51	-0.337737	0.791281	0.238679	-1.41503	0.15706	0.319487		5251.51	0.485051	1.39964	0.238573	2.03313	0.042039	0.0873355		5251.51	-0.448422	0.732844	0.238712	-1.87851	0.0603116	0.131545		5251.51	-0.624574	0.648611	0.238699	-2.61658	0.00888168	0.0222638
B0336.4	rgs-5	1126.77	1105.65	1068.2	1793.21	1590.39	1545.11	1396.71	1202.47	1312.56	1443.91	1349	1324.7	1091.39	1058.28	989.537		1269.55	0.244874	1.18499	0.10194	2.40213	0.0163	0.0766702		1269.55	0.578287	1.49308	0.101808	5.68019	1.34547e-08	1.99392e-07		1269.55	0.319004	1.24747	0.101862	3.13172	0.00173786	0.00943719		1269.55	-0.0722726	0.951139	0.102156	-0.70747	0.479274	0.584026
B0336.5	arle-14	1689.21	1315.15	903.358	1038.99	951.673	1082.92	1778.9	1725.36	1638.28	2029.77	2417.08	1939.73	786.004	770.123	693.274		1288.81	0.396199	1.31604	0.175009	2.26388	0.0235815	0.0964574		1288.81	-0.346309	0.786594	0.176126	-1.96626	0.0492686	0.0994381		1288.81	0.7088	1.63444	0.174808	4.05473	5.01932e-05	0.000745834		1288.81	-0.796702	0.575664	0.176119	-4.52366	6.07795e-06	4.23241e-05
B0336.6	abi-1	2861.74	2787.19	2089.31	2366.33	2076.7	2357.02	3290.67	2501.21	3045.85	3557.67	3854.84	2900.73	1654.61	1675.4	1594.87		2450.29	0.191588	1.14202	0.146966	1.30362	0.192362	0.364469		2450.29	-0.186461	0.878759	0.147395	-1.26505	0.205855	0.314754		2450.29	0.414419	1.33276	0.146868	2.82172	0.00477675	0.0198932		2450.29	-0.651915	0.636435	0.147403	-4.42266	9.74935e-06	6.35915e-05
B0336.7	B0336.7	1108.66	1182.25	805.393	868.607	745.749	769.18	1234.63	1077.88	1081.85	1257.73	1475.8	1208.39	611.615	586.518	583.989		920.876	0.13242	1.09613	0.14604	0.906738	0.364545	0.550121		920.876	-0.377648	0.769691	0.147462	-2.56099	0.0104375	0.0275705		920.876	0.348352	1.27311	0.145792	2.38937	0.0168772	0.0512361		920.876	-0.796983	0.575552	0.147378	-5.40774	6.38239e-08	7.78807e-07
B0336.8	lgg-3	3287.85	2424.49	1511.88	2054.15	1703.24	1788.01	2277.16	3671.59	3200.95	2888.83	2557.54	3191.49	2230.35	1900.66	1799.78		2237.8	0.340962	1.2666	0.224494	1.5188	0.128813	0.282665		2237.8	-0.381559	0.767608	0.224971	-1.69604	0.089879	0.162511		2237.8	0.25785	1.1957	0.224534	1.14838	0.250813	0.376688		2237.8	-0.28458	0.82098	0.224663	-1.2667	0.205263	0.302346
B0336.9	swp-1	960.903	1225.63	1654.12	1608.53	1581.08	1401.17	1360.69	701.283	1081.85	1104.94	743.267	978.738	754.297	762.473	718.033		1098.68	-0.289078	0.818425	0.222388	-1.29988	0.193642	0.366122		1098.68	0.257327	1.19526	0.222124	1.15848	0.246667	0.363048		1098.68	-0.442221	0.736001	0.222583	-1.98677	0.0469475	0.108744		1098.68	-0.781216	0.581876	0.222714	-3.50772	0.000451971	0.00173188
B0344.1	B0344.1	0	0	1.88396	0	0	0	0	0	0	0	0	0	0	0	0		0.104664	-1.81366	0.284468	5.23463	-0.346474	0.728987	NA		0.104664	-1.55768	0.339697	5.23463	-0.297573	0.766029	NA		0.104664	-1.78437	0.290302	5.23437	-0.340895	0.733182	NA		0.104664	-2.01239	0.247862	5.23463	-0.384438	0.700654	NA
B0344.2	wrt-9	468.059	650.652	1406.38	1707.43	2063.9	2079.26	379.193	294.482	350.922	331.887	208.739	327.232	766.813	1029.38	1002.34		1084.06	-1.30144	0.40572	0.289471	-4.49594	6.92641e-06	0.000321656		1084.06	1.21227	2.31701	0.286763	4.22742	2.36386e-05	0.000141882		1084.06	-1.54099	0.34365	0.290167	-5.31069	1.09209e-07	1.04514e-05		1084.06	0.148307	1.10827	0.28714	0.516497	0.605508	0.697167
B0344.3	B0344.3	0	0	0	0	2.32683	0	0	0	0	0	0	0	0	0.850026	0		0.235682	0	1	4.86037	0	1	NA		0.235682	2.166	4.48776	4.82425	0.448981	0.653445	NA		0.235682	0	1	4.86017	0	1	NA		0.235682	0.810899	1.7543	4.86037	0.166839	0.867497	NA
B0344.5	B0344.5	0	0	0	1.1915	2.32683	0	0	0	0	0	0	0	0	0	0.853785		0.359971	0	1	3.27464	0	1	NA		0.359971	2.76053	6.77645	3.1659	0.871958	0.383231	NA		0.359971	0	1	3.27458	0	1	NA		0.359971	0.810904	1.75431	3.27464	0.247631	0.80442	NA
B0344.t1	B0344.t1	0	0	0	1.1915	2.32683	0	0	0	0	0	0	0	0	0	0.853785		0.359971	0	1	3.27464	0	1	NA		0.359971	2.76053	6.77645	3.1659	0.871958	0.383231	NA		0.359971	0	1	3.27458	0	1	NA		0.359971	0.810904	1.75431	3.27464	0.247631	0.80442	NA
B0344.t2	B0344.t2	0	0	0	0	2.32683	0	0	0	0	0	0	0	0	0.850026	0		0.235682	0	1	4.86037	0	1	NA		0.235682	2.166	4.48776	4.82425	0.448981	0.653445	NA		0.235682	0	1	4.86017	0	1	NA		0.235682	0.810899	1.7543	4.86037	0.166839	0.867497	NA
B0348.1	B0348.1	0.953277	0	0.94198	0	0	0	0	0	0.969398	0	0	0	0	0	0		0.275529	-0.858538	0.551511	3.45109	-0.248773	0.803537	NA		0.275529	-1.56435	0.33813	3.45109	-0.453291	0.65034	NA		0.275529	-1.79106	0.28896	3.45102	-0.518994	0.603765	NA		0.275529	-2.01906	0.246719	3.45109	-0.585049	0.558515	NA
B0348.10	B0348.10	11.4393	8.3062	4.7099	0	1.16341	2.24906	5.00254	7.55083	8.72458	10.1185	11.705	8.87074	13.3504	11.0503	17.0757		7.3231	-0.196743	0.872518	0.569958	-0.345189	0.729952	NA		7.3231	-2.81557	0.142046	0.961855	-2.92723	0.00341994	0.0107334		7.3231	0.329315	1.25642	0.545198	0.604029	0.545824	NA		7.3231	0.762943	1.69695	0.522049	1.46144	0.143895	0.227634
B0348.2	B0348.2	30.5049	24.9186	23.5495	10.7235	11.6341	6.74719	31.0157	112.319	46.5311	23.2726	43.8937	46.325	45.892	36.5511	62.3263		32.9235	1.26809	2.40842	0.431169	2.94105	0.00327105	0.025937		32.9235	-1.44299	0.367804	0.508311	-2.8388	0.00452839	0.0136309		32.9235	0.524609	1.43854	0.439812	1.1928	0.232947	0.356323		32.9235	0.874535	1.83342	0.432945	2.01997	0.0433867	0.084681
B0348.4	egl-8	1313.62	1771.07	3662.42	2816.72	3060.94	2996.88	1491.76	910.819	1268.94	1226.36	868.12	1154.18	2148.58	2347.77	2335.96		2145.13	-0.877992	0.544124	0.27065	-3.24401	0.00117858	0.0126312		2145.13	0.395408	1.31531	0.270135	1.46374	0.143264	0.23728		2145.13	-1.05447	0.481474	0.270806	-3.89382	9.86766e-05	0.0011926		2145.13	0.0180985	1.01262	0.270108	0.0670046	0.946578	0.963501
B0348.5	B0348.5	93.4211	111.672	116.805	144.172	158.224	174.302	84.0427	96.2731	88.2152	100.173	109.247	93.6355	198.587	179.355	204.908		136.838	-0.261083	0.834461	0.169681	-1.53867	0.123885	0.275782		136.838	0.567021	1.48146	0.162264	3.49443	0.000475072	0.00196476		136.838	-0.0872912	0.941288	0.167554	-0.520972	0.602386	0.70714		136.838	0.856035	1.81006	0.155858	5.49241	3.96494e-08	5.10576e-07
B0348.6	ife-3	2942.77	2489.09	1652.23	3916.48	3329.69	3540.03	3161.61	2463.46	2848.09	3191.38	3891.91	2689.8	1536.13	1592.95	1681.96		2883	0.258284	1.19605	0.187727	1.37585	0.168868	0.334401		2883	0.606529	1.52259	0.187687	3.2316	0.00123101	0.0044549		2883	0.464261	1.37961	0.187653	2.47404	0.0133596	0.042988		2883	-0.558231	0.679134	0.188066	-2.96828	0.00299473	0.00878884
B0348.7	21ur-15398	0	0	0	0	0	0	1.00051	0	0	0	0	0	0	0	0.853785		0.280588	1.00963	2.01339	4.64006	0.217589	0.827749	NA		0.280588	0	1	4.64006	0	1	NA		0.280588	0	1	4.63989	0	1	NA		0.280588	0.810899	1.7543	4.64006	0.17476	0.861268	NA
B0348.8	B0348.8	0.953277	0.922911	8.47782	2.38301	5.81707	7.87172	4.00203	0.943854	0.969398	0	2.92625	0.985637	5.0064	5.10015	4.26893		4.26723	-0.819822	0.566512	0.992897	-0.825686	0.408982	NA		4.26723	0.641312	1.55975	0.889146	0.721268	0.470745	NA		4.26723	-1.38976	0.381627	1.07861	-1.28848	0.197578	NA		4.26723	0.475031	1.38995	0.873767	0.543658	0.586677	NA
B0348.9	B0348.9	2.85983	0	0.94198	0	0	0	0	3.77542	0	0	0	0.985637	2.5032	0	0.853785		0.720098	0.00229855	1.00159	2.21807	0.00103628	0.999173	NA		0.720098	-2.56733	0.168716	2.40318	-1.06831	0.285382	NA		0.720098	-1.83227	0.280822	2.40315	-0.762447	0.445793	NA		0.720098	-0.173486	0.886698	2.21616	-0.078282	0.937604	NA
B0350.10	21ur-664	0.953277	0	0	0	0	0	0	0.943854	0	0	0.975416	0	0.834399	0	0		0.205941	0.0478427	1.03372	4.33383	0.0110394	0.991192	NA		0.205941	-0.657965	0.633772	4.33383	-0.151821	0.879328	NA		0.205941	0.0770667	1.05487	4.33368	0.0177832	0.985812	NA		0.205941	-0.150887	0.900696	4.33383	-0.0348162	0.972226	NA
B0350.11	21ur-1749	2.85983	3.69164	5.65188	7.14903	9.30732	7.87172	3.00152	2.83156	3.87759	1.01185	0.975416	3.94255	3.3376	5.95018	2.56136		4.83716	-0.330459	0.795283	0.757893	-0.436024	0.662819	NA		4.83716	0.995296	1.99349	0.68222	1.45891	0.144591	0.238965		4.83716	-1.03894	0.486686	0.844602	-1.23009	0.218663	NA		4.83716	-0.0433533	0.970397	0.717566	-0.0604171	0.951823	0.966897
B0350.17	21ur-184	0	0	0	0	0	0	0	0	0	0	0	0.985637	0	0	0		0.0547576	0	1	5.2679	0	1	NA		0.0547576	0	1	5.2679	0	1	NA		0.0547576	1.03881	2.05453	5.26765	0.197205	0.843667	NA		0.0547576	0	1	5.2679	0	1	NA
B0350.18	21ur-830	0	1.84582	4.7099	5.95752	4.65366	4.49813	1.00051	2.83156	1.9388	1.01185	0	0.985637	0.834399	5.10015	0.853785		2.42204	-0.178865	0.883398	1.11165	-0.160901	0.872171	NA		2.42204	1.20115	2.29922	1.02333	1.17376	0.24049	NA		2.42204	-1.72571	0.30235	1.38786	-1.24343	0.21371	NA		2.42204	0.0461725	1.03252	1.07102	0.0431108	0.965613	NA
B0350.2	unc-44	9431.72	13846.4	29072.3	28185	28751.5	26588.4	13585.9	8290.81	11990.5	11206.2	7510.7	10217.1	16352.6	19103.5	17202.1		18148.3	-0.628325	0.646927	0.285757	-2.19881	0.0278918	0.107168		18148.3	0.674003	1.59549	0.285703	2.3591	0.0183192	0.0442882		18148.3	-0.85544	0.552697	0.285777	-2.99338	0.00275907	0.0132097		18148.3	0.00845165	1.00588	0.285711	0.0295811	0.976401	0.984393
B0350.20	21ur-3556	0.953277	2.76873	0	0	0	0	0	0	0	0	0	0	0.834399	0	0		0.370209	-2.79785	0.143801	3.14208	-0.890445	0.373227	NA		0.370209	-2.54187	0.17172	3.14208	-0.808976	0.418529	NA		0.370209	-2.76858	0.146749	3.14202	-0.881146	0.378239	NA		0.370209	-2.03479	0.244044	3.14208	-0.647593	0.517248	NA
B0350.23	21ur-3496	0.953277	0.922911	6.59386	2.38301	6.98049	2.24906	5.00254	2.83156	5.81639	7.08295	2.92625	2.95691	3.3376	5.10015	1.70757		4.02605	0.687223	1.61018	0.858382	0.800603	0.423362	NA		4.02605	0.455524	1.37128	0.892455	0.510417	0.609759	NA		4.02605	0.611326	1.52766	0.864886	0.706828	0.479673	NA		4.02605	0.262431	1.1995	0.872915	0.300638	0.763691	NA
B0350.25	21ur-3644	0	0	0	0	0	0	0	0	0	0	0	0	0	0	0		0.0591905	0	1	5.2679	0	1	NA		0.0591905	0	1	5.2679	0	1	NA		0.0591905	0	1	5.26765	0	1	NA		0.0591905	0	1	5.2679	0	1	NA
B0350.29	21ur-8016	0	0	1.88396	1.1915	0	1.12453	0	0	0	0	0	0	0	0	0		0.408905	-1.81311	0.284576	3.16225	-0.573362	0.5664	NA		0.408905	0.298998	1.23029	3.10713	0.0962296	0.923338	NA		0.408905	-1.78384	0.290409	3.16219	-0.564115	0.572676	NA		0.408905	-2.01185	0.247956	3.16225	-0.636207	0.524642	NA
B0350.37	21ur-6533	0	0	0	0	0	0	0	0	0	0	0	0	0.834399	0	0		0.0463555	0	1	5.2679	0	1	NA		0.0463555	0	1	5.2679	0	1	NA		0.0463555	0	1	5.26765	0	1	NA		0.0463555	0.810897	1.7543	5.2679	0.153932	0.877664	NA
B0350.38	21ur-8164	0	0	0	0	0	0	1.00051	0	0	0	0	0	0	0	0		0.112774	1.00963	2.01339	5.2679	0.191656	0.848012	NA		0.112774	0	1	5.2679	0	1	NA		0.112774	0	1	5.26765	0	1	NA		0.112774	0	1	5.2679	0	1	NA
B0350.4	21ur-5229	0	0	0	0	0	0	0	0	0	0	0	0	0	0	0		0.0591905	0	1	5.2679	0	1	NA		0.0591905	0	1	5.2679	0	1	NA		0.0591905	0	1	5.26765	0	1	NA		0.0591905	0	1	5.2679	0	1	NA
B0350.40	21ur-5896	0.953277	2.76873	3.76792	9.53204	5.81707	5.62266	1.00051	0.943854	4.84699	0	0	0	2.5032	5.95018	2.56136		3.50295	-0.143403	0.905381	0.957098	-0.149831	0.880898	NA		3.50295	1.4798	2.78911	0.856687	1.72736	0.0841037	NA		3.50295	-3.77864	0.0728646	1.41638	-2.6678	0.00763488	NA		3.50295	0.552643	1.46677	0.882373	0.626315	0.531109	NA
B0350.43	21ur-5573	0.953277	0	0.94198	1.1915	1.16341	1.12453	0	0	0	0	0	0	0	0	0		0.298595	-1.82018	0.283187	3.34349	-0.544394	0.58617	NA		0.298595	0.878783	1.83882	3.23808	0.271391	0.786091	NA		0.298595	-1.79091	0.28899	3.34342	-0.535652	0.592199	NA		0.298595	-2.01891	0.246745	3.34349	-0.603833	0.545955	NA
B0350.45	21ur-15396	103.907	154.126	284.478	264.514	255.951	241.774	175.089	84.9468	115.358	139.635	103.394	120.248	172.721	175.955	161.365		180.398	-0.532625	0.691296	0.289137	-1.84212	0.0654573	0.183768		180.398	0.490404	1.40484	0.285268	1.7191	0.085596	0.156246		180.398	-0.579025	0.669416	0.289637	-1.99914	0.0455932	0.106422		180.398	-0.0891068	0.940105	0.285768	-0.311815	0.755181	0.821593
B0350.56	21ur-6911	0	0	0	0	0	0	0	0.943854	0	1.01185	0	0	0.834399	0	0		0.214196	1.00963	2.0134	4.28004	0.235893	0.813516	NA		0.214196	0	1	4.28004	0	1	NA		0.214196	1.03885	2.0546	4.27991	0.242728	0.808216	NA		0.214196	0.810901	1.75431	4.28004	0.189461	0.849732	NA
B0350.58	21ur-8555	0	1.84582	0.94198	0	0	0	0	0	0	0	0	0	0	0	0		0.212763	-2.38024	0.192078	4.93362	-0.482452	0.629485	NA		0.212763	-2.12426	0.229369	4.93362	-0.430568	0.666783	NA		0.212763	-2.35094	0.196019	4.9334	-0.476535	0.633694	NA		0.212763	-2.57897	0.167361	4.93362	-0.522733	0.60116	NA
B0350.6	21ur-2935	0	0	0	0	0	0	0	0	0	0	0	0	0.834399	0	0		0.0463555	0	1	5.2679	0	1	NA		0.0463555	0	1	5.2679	0	1	NA		0.0463555	0	1	5.26765	0	1	NA		0.0463555	0.810897	1.7543	5.2679	0.153932	0.877664	NA
B0350.61	21ur-14209	87.7015	164.278	284.478	252.599	251.298	226.031	157.08	80.2276	151.226	124.458	75.107	124.19	166.045	193.806	173.318		177.985	-0.466401	0.723768	0.318501	-1.46436	0.143095	0.30213		177.985	0.444026	1.3604	0.315507	1.40734	0.159326	0.25779		177.985	-0.729137	0.603265	0.320328	-2.27622	0.0228327	0.063926		177.985	-0.00906132	0.993739	0.3155	-0.0287205	0.977088	0.984793
B0350.62	21ur-6059	0	0	0	2.38301	0	1.12453	0	0	0	0	0.975416	0	0.834399	1.70005	0		0.738387	0	1	2.22397	0	1	NA		0.738387	2.75362	6.7441	2.06128	1.33588	0.181588	NA		0.738387	1.03888	2.05463	2.22395	0.467133	0.640405	NA		0.738387	2.29052	4.89233	2.06225	1.11069	0.266701	NA
B0350.66	21ur-14975	0	0	0	0	0	1.12453	0	0.943854	0	0	0	0	0	0	0		0.11491	1.00963	2.01339	5.2679	0.191656	0.848012	NA		0.11491	1.2656	2.40428	5.2679	0.240248	0.810138	NA		0.11491	0	1	5.26765	0	1	NA		0.11491	0	1	5.2679	0	1	NA
B0350.68	B0350.68	0	0	0	0	0	0	0	0	0	0	0	0	0	0	0.853785		0.104623	0	1	5.2679	0	1	NA		0.104623	0	1	5.2679	0	1	NA		0.104623	0	1	5.26765	0	1	NA		0.104623	0.810897	1.7543	5.2679	0.153932	0.877664	NA
B0350.69	B0350.69	0.953277	0	0	0	2.32683	0	0	0	0	0	0	0	0	0	0		0.182228	-0.913941	0.530733	5.2679	-0.173492	0.862264	NA		0.182228	1.20427	2.30421	5.23459	0.23006	0.818045	NA		0.182228	-0.88464	0.541623	5.26765	-0.167938	0.866632	NA		0.182228	-1.11267	0.462437	5.2679	-0.211217	0.832718	NA
B0350.7	21ur-4973	0	0	0	0	0	0	0	0	0	0	0	0	0	0	0		0.0591905	0	1	5.2679	0	1	NA		0.0591905	0	1	5.2679	0	1	NA		0.0591905	0	1	5.26765	0	1	NA		0.0591905	0	1	5.2679	0	1	NA
B0350.71	B0350.71	135.365	231.651	489.829	697.03	663.146	673.595	252.128	130.252	247.196	218.56	132.657	182.343	297.881	345.11	290.287		381.783	-0.445174	0.734496	0.32778	-1.35815	0.174416	0.341615		381.783	1.24699	2.37346	0.324676	3.84072	0.000122675	0.000602493		381.783	-0.683732	0.622553	0.328777	-2.07963	0.0375599	0.0925704		381.783	0.123212	1.08916	0.325752	0.378239	0.705253	0.781683
B0350.72	B0350.72	0	0.922911	0	3.57451	2.32683	0	1.00051	0	0.969398	0	0	0	0	0.850026	0		0.650169	0.956492	1.94059	2.40748	0.3973	0.691146	NA		0.650169	2.54228	5.82509	2.27482	1.11757	0.263749	NA		0.650169	-0.884688	0.541605	2.48028	-0.356689	0.721325	NA		0.650169	-0.150888	0.900696	2.48031	-0.0608345	0.951491	NA
B0350.74	B0350.74	3.81311	0	0	4.76602	1.16341	1.12453	1.00051	3.77542	0	0	0.975416	1.97127	1.6688	0	0		1.18466	0.338975	1.26486	1.7109	0.198126	0.842946	NA		1.18466	0.889526	1.85257	1.68802	0.526965	0.598218	NA		1.18466	-0.359401	0.779488	1.78978	-0.200807	0.84085	NA		1.18466	-1.17466	0.442987	1.88513	-0.62312	0.533206	NA
B0350.75	B0350.75	0	0	0	0	0	0	0	0	0	0	0	0	0.834399	0	0		0.0463555	0	1	5.2679	0	1	NA		0.0463555	0	1	5.2679	0	1	NA		0.0463555	0	1	5.26765	0	1	NA		0.0463555	0.810897	1.7543	5.2679	0.153932	0.877664	NA
B0350.76	B0350.76	0.953277	0.922911	0.94198	2.38301	1.16341	0	0	0.943854	0	1.01185	0	0.985637	0.834399	0.850026	0.853785		0.949961	-1.43304	0.37035	1.78297	-0.803735	0.42155	NA		0.949961	0.316089	1.24495	1.57458	0.200744	0.840898	NA		0.949961	-0.504012	0.705143	1.68204	-0.299644	0.764449	NA		0.949961	-0.150882	0.9007	1.57645	-0.0957096	0.923751	NA
B0350.77	B0350.77	33.3647	69.2183	138.471	132.257	123.322	110.204	64.0325	32.091	62.0414	53.6281	35.115	55.1957	69.2551	88.4027	72.5717		83.2152	-0.60974	0.655315	0.362423	-1.6824	0.092491	0.22864		83.2152	0.601102	1.51688	0.353775	1.69911	0.0892989	0.161668		83.2152	-0.744743	0.596774	0.364542	-2.04295	0.0410569	0.0987223		83.2152	-0.0666336	0.954863	0.355255	-0.187566	0.851217	0.892817
B0350.78	B0350.78	0	0	0	0	0	0	0	0	0	0	0	0	0.834399	0	0		0.0463555	0	1	5.2679	0	1	NA		0.0463555	0	1	5.2679	0	1	NA		0.0463555	0	1	5.26765	0	1	NA		0.0463555	0.810897	1.7543	5.2679	0.153932	0.877664	NA
B0350.79	B0350.79	0	0	0	0	0	0	1.00051	0	1.9388	0	0	0	0	1.70005	0		0.257742	2.50267	5.66732	4.67371	0.535478	0.592319	NA		0.257742	0	1	4.74794	0	1	NA		0.257742	0	1	4.74775	0	1	NA		0.257742	1.71298	3.27838	4.7108	0.363629	0.716135	NA
B0350.8	21ur-83	0	0	0	0	1.16341	1.12453	0	0	0	0	0	0	0	0	0		0.184299	0	1	5.22988	0	1	NA		0.184299	2.14361	4.41867	5.19789	0.412401	0.680046	NA		0.184299	0	1	5.22963	0	1	NA		0.184299	0	1	5.22988	0	1	NA
B0350.82	B0350.82	0	0	0	0	0	0	0	0	0	0	0	0	0	0	0		0.0571906	0	1	5.2679	0	1	NA		0.0571906	0	1	5.2679	0	1	NA		0.0571906	0	1	5.26765	0	1	NA		0.0571906	0	1	5.2679	0	1	NA
B0350.83	B0350.83	1.90655	0	0	2.38301	1.16341	1.12453	0	1.88771	0	0	0.975416	0	0.834399	0	0		0.570835	0.00849525	1.00591	2.38563	0.00356101	0.997159	NA		0.570835	1.29815	2.45913	2.2692	0.572073	0.567272	NA		0.570835	-0.832369	0.561606	2.45339	-0.339274	0.734404	NA		0.570835	-1.06034	0.479518	2.45341	-0.43219	0.665603	NA
B0350.85	B0350.85	0.953277	1.84582	5.65188	4.76602	4.65366	6.74719	1.00051	0.943854	2.90819	1.01185	0	0	0.834399	4.25013	1.70757		2.53771	-0.800317	0.574223	1.06167	-0.753827	0.450953	NA		2.53771	0.937735	1.91552	0.927281	1.01127	0.311885	NA		2.53771	-2.98849	0.126002	1.44856	-2.06308	0.0391055	NA		2.53771	-0.318121	0.802114	0.985147	-0.322917	0.746758	NA
B0353.1	B0353.1	2741.62	2885.94	3828.21	6017.1	6601.22	6108.46	2741.39	2441.75	2648.39	2302.97	2504.87	2443.39	3772.32	4174.48	4079.39		3969.89	-0.271952	0.828198	0.12348	-2.20239	0.0276374	0.106524		3969.89	0.985838	1.98046	0.122956	8.01783	1.07627e-15	6.95608e-14		3969.89	-0.382938	0.766874	0.123587	-3.09854	0.00194476	0.0101951		3969.89	0.346902	1.27183	0.123027	2.81973	0.00480647	0.0131903
B0353.2	B0353.2	0	0	0	0	0	0	0	0	0	0	0	0	0	0	0		0.0578846	0	1	5.2679	0	1	NA		0.0578846	0	1	5.2679	0	1	NA		0.0578846	0	1	5.26765	0	1	NA		0.0578846	0	1	5.2679	0	1	NA
B0361.10	ykt-6	2418.46	2029.48	1799.18	2000.54	1906.84	1983.67	2179.11	2704.14	2399.26	2151.19	2444.39	2557.73	1862.38	1811.4	1728.06		2102.9	0.221401	1.16587	0.123265	1.79615	0.0724712	0.19614		2102.9	-0.0846228	0.943031	0.1238	-0.683546	0.494262	0.61329		2102.9	0.19552	1.14514	0.123308	1.58562	0.112826	0.208614		2102.9	-0.209675	0.864732	0.123461	-1.69831	0.0894487	0.15458
B0361.11	B0361.11	0.953277	5.53747	3.76792	0	1.16341	4.49813	1.00051	2.83156	1.9388	2.0237	2.92625	3.94255	1.6688	2.55008	4.26893		2.40148	-0.826705	0.563815	1.04031	-0.794671	0.426805	NA		2.40148	-0.84121	0.558175	1.07428	-0.783045	0.433601	NA		2.40148	-0.208571	0.865394	0.982596	-0.212265	0.8319	NA		2.40148	-0.279633	0.8238	0.970375	-0.28817	0.773217	NA
B0361.14	B0361.14	20.0188	20.304	17.8976	15.4896	17.4512	15.7434	19.0097	20.7648	19.388	19.2252	23.41	24.6409	30.0384	25.5008	33.2976		21.319	0.023723	1.01658	0.337516	0.0702872	0.943965	0.971323		21.319	-0.258215	0.836122	0.359641	-0.71798	0.47277	0.593642		21.319	0.209555	1.15633	0.332274	0.630667	0.528258	0.642811		21.319	0.609405	1.52563	0.315594	1.93098	0.0534856	0.100789
B0361.2	cwf-19L2	1745.45	1448.97	1050.31	699.413	715.5	742.191	1743.89	1724.42	1653.79	1829.43	2104.95	1956.49	902.82	968.179	853.785		1225.77	0.271101	1.20673	0.150034	1.80693	0.0707727	0.193247		1225.77	-0.976452	0.508228	0.152429	-6.40596	1.49425e-10	3.57735e-09		1225.77	0.472891	1.38789	0.149885	3.15501	0.0016049	0.00891883		1225.77	-0.63948	0.641944	0.15087	-4.23861	2.24903e-05	0.000131552
B0361.3	B0361.3	1408.94	1379.75	1087.99	1033.03	964.471	995.211	1629.83	1364.81	1413.38	1464.15	1416.3	1370.04	1060.52	1122.88	1039.06		1173.31	0.185121	1.13691	0.115783	1.59887	0.10985	0.254193		1173.31	-0.373429	0.771945	0.117276	-3.1842	0.00145155	0.0051446		1173.31	0.132764	1.09639	0.115898	1.14553	0.251989	0.377849		1173.31	-0.266673	0.831234	0.116161	-2.29571	0.0216923	0.047266
B0361.4	B0361.4	29.5516	39.6852	50.8669	16.6811	23.2683	24.7397	21.0107	25.4841	16.4798	21.2489	28.2871	28.5835	44.2232	44.2013	52.9347		34.2115	-0.930453	0.524694	0.311501	-2.98699	0.00281736	0.0234242		34.2115	-0.890232	0.539527	0.319693	-2.78465	0.00535859	0.0157233		34.2115	-0.619664	0.650822	0.302243	-2.05022	0.0403428	0.097583		34.2115	0.234243	1.17629	0.278275	0.84177	0.399917	0.508892
B0361.5	psd-1	1187.78	1173.02	916.546	1370.23	1246.02	1280.84	1277.65	1044.85	1267.97	1258.74	1486.53	1099.97	1291.65	1120.33	1220.91		1198.15	0.131477	1.09541	0.140272	0.937302	0.348603	0.534752		1198.15	0.2498	1.18904	0.140473	1.77829	0.0753571	0.140977		1198.15	0.230589	1.17331	0.140177	1.64499	0.0999714	0.190208		1198.15	0.148606	1.1085	0.139992	1.06153	0.288448	0.394516
B0361.6	B0361.6	2357.45	1977.8	1268.85	1212.95	1063.36	1256.1	2379.21	2504.04	2448.7	2574.15	3000.38	2602.08	1076.37	1092.28	864.031		1686.73	0.387748	1.30835	0.177939	2.17911	0.0293234	0.110534		1686.73	-0.665776	0.630349	0.17908	-3.71775	0.000201004	0.000930209		1686.73	0.54506	1.45908	0.177873	3.06433	0.0021816	0.0110837		1686.73	-0.885833	0.541175	0.178793	-4.95451	7.25145e-07	6.58793e-06
B0361.7	pho-5	590.078	603.584	600.041	551.667	531.681	498.168	621.315	441.724	546.74	616.217	649.627	520.417	457.251	462.414	493.488		551.765	-0.156773	0.897029	0.131427	-1.19285	0.232928	0.413059		551.765	-0.181898	0.881542	0.132451	-1.37332	0.169651	0.270595		551.765	-0.00601927	0.995836	0.13104	-0.0459346	0.963362	0.976763		551.765	-0.344097	0.787801	0.131389	-2.61893	0.00882064	0.0221402
B0361.8	algn-11	1539.54	1529.26	1189.72	1214.14	1008.68	1117.78	1744.89	1401.62	1581.09	1668.54	1858.17	1586.88	1007.12	1055.73	983.561		1299.33	0.150581	1.11002	0.129166	1.1658	0.243696	0.424062		1299.33	-0.350341	0.784399	0.130303	-2.68867	0.00717378	0.0201055		1299.33	0.264001	1.2008	0.129072	2.04538	0.0408174	0.0984095		1299.33	-0.483258	0.71536	0.129747	-3.72463	0.000195604	0.000844736
B0361.9	B0361.9	379.404	280.565	327.809	272.855	297.834	306.997	269.137	354.889	257.86	338.97	382.363	372.571	471.436	374.011	443.968		336.962	-0.162503	0.893474	0.157479	-1.0319	0.302119	0.487205		336.962	-0.169772	0.888983	0.158929	-1.06823	0.285417	0.406397		336.962	0.147779	1.10786	0.156186	0.946173	0.34406	0.471564		336.962	0.384927	1.30579	0.154514	2.49122	0.0127307	0.0302145
B0365.1	acly-2	507.143	562.976	586.853	850.735	785.305	709.58	645.328	403.026	520.567	504.913	364.806	437.623	759.303	693.621	711.203		656.742	-0.0794425	0.946423	0.165826	-0.479071	0.631888	0.769137		656.742	0.501171	1.41536	0.165041	3.03664	0.0023923	0.00789291		656.742	-0.342287	0.78879	0.166695	-2.05337	0.040037	0.097077		656.742	0.385209	1.30605	0.164387	2.34331	0.0191136	0.0425794
B0365.10	B0365.10	0	0	1.88396	0	0	1.12453	0	0	0	0	0	0	0	0	0		0.226329	-1.81362	0.284477	4.89052	-0.370843	0.710754	NA		0.226329	-0.595854	0.661653	4.89052	-0.121838	0.903027	NA		0.226329	-1.78431	0.290314	4.89032	-0.364867	0.715211	NA		0.226329	-2.01235	0.24787	4.89052	-0.411479	0.680721	NA
B0365.2	B0365.2	1.90655	2.76873	5.65188	1.1915	0	1.12453	1.00051	1.88771	0.969398	1.01185	1.95083	1.97127	2.5032	2.55008	1.70757		1.62361	-1.4148	0.375061	1.12495	-1.25766	0.208515	NA		1.62361	-2.15591	0.224391	1.33602	-1.61368	0.106597	NA		1.62361	-1.06242	0.478829	1.07743	-0.986069	0.324099	NA		1.62361	-0.610701	0.654878	1.0021	-0.60942	0.542246	NA
B0365.3	eat-6	8397.42	11627.8	20904.4	18598.2	20051.5	19122.7	8019.07	5624.42	6978.69	7191.22	4847.82	6411.57	13365.4	15547.8	16193.7		14122	-0.988964	0.50384	0.244058	-4.05217	5.07451e-05	0.00136635		14122	0.497233	1.4115	0.243943	2.03832	0.0415179	0.0864113		14122	-1.14949	0.450785	0.244086	-4.70936	2.48496e-06	9.87528e-05		14122	0.140203	1.10206	0.243937	0.574753	0.565459	0.662691
B0365.5	clec-225	3.81311	0.922911	4.7099	5.95752	3.49024	3.3736	7.00356	5.66312	1.9388	3.03555	3.90166	5.91382	10.8472	1.70005	10.2454		4.43641	0.631182	1.54883	0.829155	0.761235	0.446517	NA		4.43641	0.441088	1.35763	0.858894	0.513554	0.607564	NA		4.43641	0.450174	1.36621	0.842159	0.534548	0.592962	NA		4.43641	1.27625	2.42209	0.791287	1.61288	0.106771	NA
B0365.6	clec-41	143.945	170.739	237.379	172.768	230.356	195.669	101.051	119.869	121.175	122.434	120.952	155.731	289.537	335.76	362.005		211.58	-0.689851	0.619918	0.1968	-3.50534	0.000456031	0.00640548		211.58	0.117386	1.08477	0.191977	0.611459	0.540896	0.655741		211.58	-0.467984	0.722974	0.194915	-2.40096	0.016352	0.0501175		211.58	0.838414	1.78808	0.186034	4.50677	6.58204e-06	4.53696e-05
B0365.7	dhc-3	32.4114	32.3019	76.3003	50.0432	38.3927	59.6002	29.0147	25.4841	24.2349	31.3674	20.4837	30.5548	51.7327	81.6025	61.4725		46.449	-0.841217	0.558173	0.350816	-2.39789	0.01649	0.0772067		46.449	0.0713339	1.05069	0.337169	0.211568	0.832444	0.885863		46.449	-0.775848	0.584045	0.349908	-2.21729	0.0266032	0.0713815		46.449	0.466233	1.3815	0.326236	1.42913	0.152967	0.239115
B0365.8	B0365.8	0	0.922911	0	0	0	0	2.00102	0	0	0	0	0	0	2.55008	0		0.304111	0.982631	1.97607	4.53565	0.216646	0.828484	NA		0.304111	-0.657964	0.633772	4.57673	-0.143763	0.885688	NA		0.304111	-0.884635	0.541625	4.57656	-0.193297	0.846726	NA		0.304111	1.33632	2.52507	4.49996	0.296963	0.766495	NA
B0365.9	B0365.9	1349.84	885.072	656.56	952.012	938.876	1206.62	763.388	2188.8	1318.38	849.954	1069.06	1175.87	2448.13	2042.61	2153.25		1244.13	0.562831	1.47716	0.289767	1.94235	0.0520941	0.159283		1244.13	0.0994223	1.07134	0.290295	0.342488	0.731984	0.81237		1244.13	0.0981653	1.07041	0.2901	0.338384	0.735074	0.814574		1244.13	1.2003	2.29788	0.289407	4.14744	3.36209e-05	0.00018489
B0379.1	B0379.1	163.01	163.355	226.075	92.9374	116.341	110.204	103.052	194.434	120.205	135.588	130.706	129.118	271.18	269.458	283.457		176.631	-0.401709	0.756961	0.229795	-1.74812	0.0804431	0.208957		176.631	-0.789503	0.578543	0.235635	-3.35053	0.000806574	0.00310265		176.631	-0.482479	0.715747	0.230625	-2.09205	0.0364345	0.0904305		176.631	0.577035	1.49178	0.22385	2.57778	0.00994379	0.0245354
B0379.12	B0379.12	0	0	0	0	0	0	0	0	0	0	0	0	0	0	0		0.0591905	0	1	5.2679	0	1	NA		0.0591905	0	1	5.2679	0	1	NA		0.0591905	0	1	5.26765	0	1	NA		0.0591905	0	1	5.2679	0	1	NA
B0379.2	B0379.2	0	0.922911	0	0	1.16341	0	0	0.943854	1.9388	0	0	0	1.6688	0	0		0.368765	1.51589	2.85975	3.18992	0.475211	0.634637	NA		0.368765	0.303824	1.23441	3.29591	0.092182	0.926553	NA		0.368765	-0.884673	0.54161	3.29585	-0.26842	0.788376	NA		0.368765	0.729185	1.6577	3.24464	0.224735	0.822185	NA
B0379.3	mut-16	2407.98	3441.54	5195.02	5866.97	5551.82	5071.64	3698.88	1622.48	3007.07	2979.9	1466.05	2309.35	1709.68	1704.3	1558.16		3535.91	-0.407283	0.754042	0.285823	-1.42495	0.154172	0.3164		3535.91	0.578283	1.49307	0.285654	2.02442	0.0429273	0.088801		3535.91	-0.709291	0.611621	0.285932	-2.48063	0.0131152	0.0423926		3535.91	-1.15139	0.45019	0.286018	-4.02561	5.68285e-05	0.000290168
B0379.4	scpl-1	1173.48	1511.73	2291.84	2091.09	2261.68	2078.13	1075.55	804.163	1119.65	1003.76	682.791	923.542	1153.14	1362.59	1302.88		1582.78	-0.730761	0.602586	0.208648	-3.50236	0.000461158	0.00646555		1582.78	0.369712	1.2921	0.207931	1.77805	0.0753956	0.141032		1582.78	-0.931315	0.52438	0.208927	-4.45762	8.28756e-06	0.000229056		1582.78	-0.382278	0.767225	0.208138	-1.83666	0.0662601	0.120536
B0379.6	B0379.6	0	1.84582	0	0	0	0	0	0	0	0	0	0	0.834399	0.850026	0		0.196125	-1.78652	0.289871	5.13649	-0.347809	0.727983	NA		0.196125	-1.53054	0.346148	5.13649	-0.297974	0.765723	NA		0.196125	-1.75721	0.29582	5.13625	-0.342119	0.732261	NA		0.196125	-0.133542	0.91159	5.10304	-0.0261692	0.979122	NA
B0379.7	B0379.7	0.953277	0.922911	0.94198	0	1.16341	3.3736	0	0.943854	0	0	0	0	2.5032	2.55008	0		0.85687	-1.43307	0.370343	1.94603	-0.736404	0.461485	NA		0.85687	0.699113	1.62351	1.71085	0.408634	0.682808	NA		0.85687	-2.3656	0.194036	1.94602	-1.21561	0.224133	NA		0.85687	0.844446	1.79558	1.65756	0.509452	0.610435	NA
B0379.8	B0379.8	0	0	0	0	0	0	0	0	1.9388	0	0.975416	0	0	0	0		0.161901	1.90341	3.74096	5.23505	0.363589	0.716165	NA		0.161901	0	1	5.2679	0	1	NA		0.161901	1.03883	2.05457	5.26765	0.19721	0.843663	NA		0.161901	0	1	5.2679	0	1	NA
B0391.1	B0391.1	0	0	0	0	0	0	0	0.943854	0	0	0	0	0	0	0		0.0524363	1.00963	2.01339	5.2679	0.191656	0.848012	NA		0.0524363	0	1	5.2679	0	1	NA		0.0524363	0	1	5.26765	0	1	NA		0.0524363	0	1	5.2679	0	1	NA
B0391.10	B0391.10	20.0188	26.7644	32.9693	54.8092	45.3732	34.8605	17.0086	27.3718	19.388	20.237	22.4346	14.7846	21.6944	21.2506	19.6371		32.705	-0.3196	0.801292	0.321675	-0.993551	0.320441	0.504809		32.705	0.756398	1.68927	0.299621	2.52452	0.0115857	0.0301259		32.705	-0.473734	0.720098	0.328266	-1.44314	0.148981	0.256469		32.705	-0.350273	0.784436	0.316228	-1.10766	0.268009	0.372566
B0391.11	fbxa-152	32.4114	36.9164	51.8089	11.915	12.7976	20.2416	19.0097	24.5402	23.2655	21.2489	37.0658	23.6553	39.2168	34.851	52.9347		29.6483	-0.856778	0.552184	0.333406	-2.56977	0.0101765	0.0567054		29.6483	-1.42517	0.372374	0.366663	-3.88688	0.00010154	0.000508238		29.6483	-0.561562	0.677568	0.325688	-1.72423	0.0846659	0.16873		29.6483	0.0677665	1.04809	0.307923	0.220076	0.825812	0.874202
B0391.12	str-263	0	0	0	0	0	0	0	0	0	0	0	0	0	0	0		0.0571906	0	1	5.2679	0	1	NA		0.0571906	0	1	5.2679	0	1	NA		0.0571906	0	1	5.26765	0	1	NA		0.0571906	0	1	5.2679	0	1	NA
B0391.14	B0391.14	95.3277	108.904	110.212	78.6393	82.6024	67.4719	97.0493	188.771	154.134	80.948	96.5662	141.932	134.338	130.904	112.7		108.22	0.485829	1.40039	0.238646	2.03578	0.0417728	0.138531		108.22	-0.460148	0.726912	0.250839	-1.83444	0.0665888	0.127593		108.22	0.0231452	1.01617	0.24252	0.0954362	0.923968	0.951401		108.22	0.265312	1.2019	0.23879	1.11106	0.26654	0.371
B0391.4	str-12	3.81311	7.38329	8.47782	13.1066	15.1244	11.2453	3.00152	3.77542	4.84699	3.03555	1.95083	0.985637	8.34399	6.8002	11.0992		6.94152	-0.759155	0.590842	0.64109	-1.18416	0.236349	NA		6.94152	1.00144	2.002	0.546444	1.83266	0.0668537	0.127999		6.94152	-1.72774	0.301924	0.764239	-2.26074	0.0237756	NA		6.94152	0.413024	1.33147	0.551852	0.748431	0.4542	0.560471
B0391.5	fbxa-153	530.975	459.61	326.867	283.578	259.441	278.884	544.276	622.944	568.067	568.66	544.282	603.21	391.333	387.612	356.028		419.342	0.397708	1.31741	0.152791	2.60297	0.00924214	0.0531109		419.342	-0.68064	0.623888	0.158483	-4.29471	1.74921e-05	0.000109595		419.342	0.381504	1.3027	0.152912	2.49492	0.0125984	0.0411885		419.342	-0.214941	0.861581	0.154051	-1.39526	0.162937	0.251439
B0391.6	fbxa-154	6.67294	4.61456	10.3618	2.38301	11.6341	6.74719	8.00406	3.77542	0.969398	6.0711	3.90166	3.94255	6.67519	1.70005	3.41514		5.65265	-0.770672	0.586144	0.726524	-1.06077	0.288796	NA		5.65265	-0.0557497	0.962094	0.695996	-0.0801006	0.936157	0.957679		5.65265	-0.638846	0.642226	0.718955	-0.888576	0.374231	NA		5.65265	-0.872118	0.546344	0.719337	-1.21239	0.225363	0.325188
B0391.8	B0391.8	93.4211	132.899	161.079	225.194	248.971	217.035	122.062	75.5083	101.787	105.232	72.1808	95.6068	110.141	111.353	125.506		142.845	-0.374176	0.771546	0.217031	-1.72406	0.0846964	0.215812		142.845	0.834754	1.78355	0.209368	3.98702	6.69072e-05	0.000353195		142.845	-0.506134	0.704107	0.218863	-2.31256	0.020747	0.0597356		142.845	-0.159435	0.895376	0.213114	-0.748122	0.454387	0.560661
B0391.9	fbxa-139	22.8786	33.2248	21.6655	34.5536	27.922	33.736	18.0091	21.7086	14.541	15.1778	13.6558	13.7989	18.3568	17.0005	16.2219		20.1787	-0.519468	0.697629	0.340682	-1.52479	0.127312	0.280707		20.1787	0.305334	1.2357	0.322401	0.947061	0.343607	0.468		20.1787	-0.869581	0.547306	0.356727	-2.43767	0.0147824	NA		20.1787	-0.593662	0.662659	0.336137	-1.76613	0.0773742	0.136828
B0393.1	rps-0	24096	20892.9	18527.8	28405.5	30375.6	29948.5	22938.6	18988.5	20919.6	29451.9	36679.5	25508.3	23400.7	26869.3	26669.7		25881.1	-0.0153035	0.989448	0.140188	-0.109164	0.913072	0.95362		25881.1	0.482286	1.39696	0.14017	3.44071	0.000580183	0.00233033		25881.1	0.528845	1.44277	0.140153	3.77333	0.000161084	0.00168111		25881.1	0.276595	1.21133	0.140155	1.9735	0.0484392	0.092774
B0393.10	B0393.10	0	0	0.94198	0	1.16341	0	0	0	0	0	0	1.97127	0	1.70005	0		0.320929	-0.913947	0.530731	3.88345	-0.235344	0.813942	NA		0.320929	0.303823	1.23441	3.88345	0.0782354	0.937641	NA		0.320929	0.966476	1.95406	3.83906	0.251748	0.801236	NA		0.320929	0.750867	1.6828	3.83799	0.195641	0.844891	NA
B0393.11	B0393.11	0	0	0	1.1915	0	1.12453	0	0	0	0	0	0	0	0	0		0.128669	0	1	5.2679	0	1	NA		0.128669	2.15978	4.46846	5.23502	0.412563	0.679927	NA		0.128669	0	1	5.26765	0	1	NA		0.128669	0	1	5.2679	0	1	NA
B0393.12	B0393.12	0.953277	0.922911	0	0	0	0	1.00051	0	0	0	0	0	0	0	0		0.159816	-0.846345	0.556192	5.23501	-0.16167	0.871565	NA		0.159816	-1.55215	0.341002	5.23501	-0.296494	0.766853	NA		0.159816	-1.77883	0.29142	5.23475	-0.339811	0.733999	NA		0.159816	-2.00686	0.248815	5.23501	-0.383353	0.701458	NA
B0393.13	B0393.13	0	0	0	0	0	0	0	0.943854	0	0	0	0	0.834399	0.850026	0.853785		0.193448	1.00963	2.01339	4.40157	0.229379	0.818574	NA		0.193448	0	1	4.40157	0	1	NA		0.193448	0	1	4.40142	0	1	NA		0.193448	2.29185	4.89682	4.32205	0.530269	0.595926	NA
B0393.14	B0393.14	1.90655	1.84582	2.82594	3.57451	6.98049	4.49813	4.00203	0	0.969398	2.0237	1.95083	3.94255	4.172	0.850026	1.70757		4.25906	-0.428884	0.742836	1.00575	-0.426433	0.669792	NA		4.25906	1.19564	2.29047	0.870682	1.37322	0.169683	NA		4.25906	0.268822	1.20482	0.926366	0.290189	0.771671	NA		4.25906	0.0385258	1.02706	0.926598	0.0415777	0.966835	NA
B0393.15	B0393.15	0	0	0	0	0	0	0	0.943854	0	0	0	0	0	0	0		0.0524363	1.00963	2.01339	5.2679	0.191656	0.848012	NA		0.0524363	0	1	5.2679	0	1	NA		0.0524363	0	1	5.26765	0	1	NA		0.0524363	0	1	5.2679	0	1	NA
B0393.16	B0393.16	0	0	0	0	0	0	0	0	0	0	0	0	0	0.850026	0		0.0472236	0	1	5.2679	0	1	NA		0.0472236	0	1	5.2679	0	1	NA		0.0472236	0	1	5.26765	0	1	NA		0.0472236	0.810897	1.7543	5.2679	0.153932	0.877664	NA
B0393.2	rbg-3	1988.54	2329.43	2354.01	2267.43	1917.31	1907.21	2579.31	1617.77	2210.23	2322.2	1938.15	2059.98	1226.57	1165.39	1110.77		1903.77	-0.0585918	0.960201	0.153001	-0.38295	0.701757	0.818833		1903.77	-0.131315	0.912999	0.153265	-0.856784	0.391564	0.516675		1903.77	-0.0781874	0.947247	0.153037	-0.510907	0.609416	0.712894		1903.77	-0.929638	0.52499	0.153612	-6.05187	1.43175e-09	2.88694e-08
B0393.3	B0393.3	4468.96	5061.25	5212.92	6318.55	5371.49	5059.27	5894.99	3178.9	4541.63	5544.94	3915.32	4420.58	2213.66	2108.91	1844.18		4509.13	-0.114866	0.923468	0.189155	-0.607256	0.543681	0.703461		4509.13	0.184029	1.13605	0.189144	0.972956	0.330575	0.455137		4509.13	-0.0869806	0.941491	0.189156	-0.459836	0.645634	0.741693		4509.13	-1.25745	0.418282	0.189517	-6.63502	3.24454e-11	9.90861e-10
B0393.4	B0393.4	44.804	52.6059	31.0853	25.0216	31.4122	41.6077	45.0229	35.8664	33.9289	42.4977	41.9429	45.3393	22.5288	14.4504	18.7833		33.9174	-0.164635	0.892154	0.282595	-0.582585	0.560173	0.715833		33.9174	-0.387377	0.764518	0.294606	-1.3149	0.188543	0.294023		33.9174	0.0136039	1.00947	0.279518	0.0486692	0.961183	0.975537		33.9174	-1.20405	0.434054	0.306258	-3.93149	8.44202e-05	0.00041058
B0393.5	B0393.5	1543.36	1994.41	3010.57	3553.07	3697.33	3444.44	1683.85	1276.09	1649.91	1459.09	1148.06	1541.54	2806.08	3083.89	2947.27		2457.34	-0.506501	0.703928	0.195942	-2.58495	0.00973929	0.0548915		2457.34	0.707696	1.63319	0.195398	3.62181	0.000292544	0.00128659		2457.34	-0.658525	0.633526	0.196092	-3.35825	0.000784367	0.00520003		2457.34	0.432451	1.34952	0.195331	2.21395	0.0268326	0.0565881
B0393.6	B0393.6	925.632	1159.18	1527.89	2052.96	1821.91	1721.66	1258.64	592.74	970.367	1034.11	695.472	760.912	386.327	411.412	400.425		1181.59	-0.356775	0.780908	0.2305	-1.54783	0.121663	0.272389		1181.59	0.631396	1.54906	0.229881	2.74663	0.00602119	0.0173884		1181.59	-0.536787	0.689305	0.230742	-2.32635	0.02	0.0582405		1181.59	-1.59229	0.331645	0.232128	-6.85952	6.90936e-12	2.49353e-10
B0393.7	B0393.7	74.3556	83.9849	109.27	69.1073	88.4195	60.7247	55.0279	71.7329	65.919	52.6162	51.6971	60.1239	107.637	120.704	127.214		76.5709	-0.472493	0.720718	0.214581	-2.20193	0.0276699	0.106568		76.5709	-0.295204	0.814957	0.215945	-1.36703	0.171615	0.272831		76.5709	-0.702623	0.614454	0.219335	-3.20342	0.00135806	0.00788492		76.5709	0.409557	1.32828	0.201297	2.03459	0.0418924	0.0822081
B0393.8	B0393.8	543.368	563.899	219.481	139.406	148.917	137.193	360.183	706.946	514.75	467.475	477.954	617.995	424.709	354.461	419.209		357.436	0.253994	1.1925	0.280263	0.906269	0.364793	0.55044		357.436	-1.6407	0.3207	0.287998	-5.69693	1.21985e-08	1.84311e-07		357.436	0.236793	1.17837	0.280337	0.84467	0.398295	0.525619		357.436	-0.146845	0.903224	0.280605	-0.523314	0.600756	0.692972
B0393.9	B0393.9	148.711	107.058	113.038	107.235	82.6024	85.4644	107.054	209.536	142.501	124.458	144.362	155.731	206.931	191.256	229.668		139.324	0.318124	1.24671	0.222279	1.43119	0.152375	0.314191		139.324	-0.422264	0.746252	0.231911	-1.8208	0.0686372	0.130532		139.324	0.203911	1.15182	0.223309	0.913134	0.361172	0.489035		139.324	0.768051	1.70297	0.218666	3.51243	0.000444024	0.00170527
B0395.1	nhx-1	162.057	165.201	163.904	245.45	262.932	245.148	241.122	261.448	237.502	218.56	268.239	232.61	266.173	255.858	243.329		222.847	0.591768	1.50709	0.133737	4.42486	9.65032e-06	0.000415454		222.847	0.617356	1.53406	0.135493	4.55637	5.20447e-06	3.80497e-05		222.847	0.551132	1.46523	0.134242	4.10551	4.03422e-05	0.000654595		222.847	0.640017	1.55835	0.13212	4.8442	1.27126e-06	1.07721e-05
B0395.10	B0395.10	0	0	0	2.38301	0	0	1.00051	0	0	0	0	0	0	0	0		0.245164	1.00963	2.01339	4.80142	0.210277	0.833452	NA		0.245164	2.19724	4.586	4.76252	0.46136	0.64454	NA		0.245164	0	1	4.80123	0	1	NA		0.245164	0	1	4.80142	0	1	NA
B0395.2	mboa-1	578.639	584.203	756.41	1127.16	1099.43	1117.78	535.272	650.315	606.843	537.292	582.323	562.799	1017.13	1042.98	1192.74		810.817	-0.0982063	0.934194	0.126212	-0.778106	0.436506	0.614991		810.817	0.801223	1.74258	0.124595	6.43064	1.27064e-10	3.08107e-09		810.817	-0.189863	0.876689	0.126601	-1.49969	0.133694	0.236133		810.817	0.761144	1.69483	0.123869	6.14478	8.00768e-10	1.7279e-08
B0395.3	B0395.3	1260.23	1609.56	2446.32	3555.45	3190.08	3011.5	1873.95	934.415	1457	1624.02	1034.92	1238.95	1420.15	1462.89	1599.99		2035.21	-0.317857	0.802261	0.24327	-1.3066	0.191347	0.363335		2035.21	0.876042	1.83533	0.242803	3.60803	0.00030853	0.00134714		2035.21	-0.447765	0.733178	0.243383	-1.83976	0.0658042	0.140411		2035.21	-0.245913	0.843282	0.243103	-1.01156	0.311749	0.418779
B0395.7	B0395.7	2.85983	7.38329	4.7099	19.0641	12.7976	13.4944	10.0051	9.43854	12.6022	5.05925	9.75416	8.87074	12.516	10.2003	9.39164		9.97835	1.09431	2.13511	0.547258	1.99963	0.0455405	NA		9.97835	1.59338	3.01756	0.538249	2.9603	0.00307336	0.00979578		9.97835	0.661929	1.5822	0.568573	1.16419	0.244346	NA		9.97835	1.0983	2.14102	0.539652	2.0352	0.0418311	0.0821067
B0395.t1	B0395.t1	0	0	0	2.38301	0	0	1.00051	0	0	0	0	0	0	0	0		0.245164	1.00963	2.01339	4.80142	0.210277	0.833452	NA		0.245164	2.19724	4.586	4.76252	0.46136	0.64454	NA		0.245164	0	1	4.80123	0	1	NA		0.245164	0	1	4.80142	0	1	NA
B0399.1	kcnl-1	90.5613	102.443	259.986	116.767	166.368	154.061	50.0254	50.9681	54.2863	34.4029	37.0658	52.2388	103.465	132.604	145.143		127.655	-1.54447	0.342822	0.326851	-4.72529	2.2979e-06	0.000146415		127.655	-0.0507715	0.96542	0.315175	-0.16109	0.872023	0.914244		127.655	-1.87204	0.273186	0.332389	-5.63209	1.78042e-08	2.62091e-06		127.655	-0.248994	0.841483	0.313744	-0.793622	0.427416	0.535427
B0399.2	oac-1	8.57949	5.53747	6.59386	39.3197	51.1902	42.7322	5.00254	6.60698	5.81639	11.1304	9.75416	7.8851	22.5288	29.7509	33.2976		17.0317	-0.243753	0.844546	0.529863	-0.460029	0.645495	0.77969		17.0317	2.68827	6.44539	0.427957	6.28163	3.35033e-10	7.31442e-09		17.0317	0.475297	1.3902	0.486602	0.976766	0.328685	NA		17.0317	2.04846	4.13663	0.430842	4.75454	1.98897e-06	1.60154e-05
B0399.3	B0399.3	0.953277	0	2.82594	2.38301	2.32683	1.12453	0	0	0.969398	0	0	0.985637	3.3376	1.70005	1.70757		1.65531	-1.85125	0.277152	1.59395	-1.16142	0.245471	NA		1.65531	0.626362	1.54367	1.25231	0.500165	0.616959	NA		1.65531	-1.822	0.282828	1.59394	-1.14308	0.253006	NA		1.65531	0.843219	1.79405	1.18902	0.709169	0.47822	NA
B0399.t1	B0399.t1	0	0	0	0	0	1.12453	0	0	0	0	0	0	0	0	0		0.062474	0	1	5.2679	0	1	NA		0.062474	1.2656	2.40428	5.2679	0.240248	0.810138	NA		0.062474	0	1	5.26765	0	1	NA		0.062474	0	1	5.2679	0	1	NA
B0399.t10	B0399.t10	0	0	0	0	1.16341	0	0	0	0	0	0	0	0	0.850026	0		0.169048	0	1	5.2679	0	1	NA		0.169048	1.2656	2.40428	5.2679	0.240248	0.810138	NA		0.169048	0	1	5.26765	0	1	NA		0.169048	0.810897	1.7543	5.2679	0.153932	0.877664	NA
B0399.t11	B0399.t11	0	1.84582	0	0	0	0	0	1.88771	0	0	0	0	0	0	0.853785		0.254851	0.0338719	1.02376	4.7105	0.00719072	0.994263	NA		0.254851	-1.5309	0.346061	4.7443	-0.322682	0.746936	NA		0.254851	-1.75757	0.295746	4.74411	-0.370474	0.711029	NA		0.254851	-1.02382	0.491811	4.7443	-0.215801	0.829143	NA
B0399.t12	B0399.t12	0	0	0.94198	0	0	2.24906	0	0	0	0	0	0	0	0	0		0.351546	-0.913949	0.530731	3.2864	-0.2781	0.780935	NA		0.351546	1.1648	2.24202	3.23717	0.359821	0.718981	NA		0.351546	-0.884679	0.541608	3.28634	-0.269199	0.787777	NA		0.351546	-1.11268	0.462434	3.2864	-0.338571	0.734933	NA
B0399.t13	B0399.t13	0	0	0	0	1.16341	0	0	0	0	0	0	0	0	0	0		0.0646342	0	1	5.2679	0	1	NA		0.0646342	1.2656	2.40428	5.2679	0.240248	0.810138	NA		0.0646342	0	1	5.26765	0	1	NA		0.0646342	0	1	5.2679	0	1	NA
B0399.t2	B0399.t2	0	0	0	0	0	0	0	0	0	0	0	0	0	0	0.853785		0.104623	0	1	5.2679	0	1	NA		0.104623	0	1	5.2679	0	1	NA		0.104623	0	1	5.26765	0	1	NA		0.104623	0.810897	1.7543	5.2679	0.153932	0.877664	NA
B0399.t3	B0399.t3	0	0	0.94198	0	0	0	0	0	0	0	0	0	0.834399	0	0		0.0986877	-0.913941	0.530733	5.2679	-0.173492	0.862264	NA		0.0986877	-0.657962	0.633773	5.2679	-0.1249	0.900603	NA		0.0986877	-0.884652	0.541618	5.26765	-0.167941	0.86663	NA		0.0986877	-0.150887	0.900697	5.2679	-0.0286426	0.97715	NA
B0399.t4	B0399.t4	0	0.922911	0	0	0	0	0	0	0	0	0	0	0	0	0		0.0512728	-0.913941	0.530733	5.2679	-0.173492	0.862264	NA		0.0512728	-0.657962	0.633773	5.2679	-0.1249	0.900603	NA		0.0512728	-0.884666	0.541613	5.26765	-0.167943	0.866628	NA		0.0512728	-1.11267	0.462437	5.2679	-0.211217	0.832718	NA
B0399.t6	B0399.t6	0	0.922911	0	1.1915	1.16341	0	0	0	0	0	0	0	0	0	0		0.182102	-0.913941	0.530733	5.25624	-0.173877	0.861962	NA		0.182102	1.22024	2.32985	5.22176	0.233684	0.815231	NA		0.182102	-0.88464	0.541623	5.25599	-0.168311	0.866339	NA		0.182102	-1.11267	0.462437	5.25624	-0.211686	0.832352	NA
B0399.t8	B0399.t8	0	0	0.94198	1.1915	0	0	0	0	0	0	0	0	0	0	0		0.176412	-0.913941	0.530733	5.2679	-0.173492	0.862264	NA		0.176412	0.303821	1.23441	5.2679	0.057674	0.954008	NA		0.176412	-0.884639	0.541623	5.26765	-0.167938	0.866632	NA		0.176412	-1.11267	0.462437	5.2679	-0.211217	0.832718	NA
B0403.11	B0403.11	2.85983	1.84582	0	0	1.16341	3.3736	0	0.943854	0	1.01185	0	0.985637	0	0	1.70757		0.829639	-2.17198	0.221905	1.99263	-1.09001	0.27571	NA		0.829639	-0.041516	0.971633	1.76386	-0.023537	0.981222	NA		0.829639	-1.24104	0.423068	1.90249	-0.652323	0.514193	NA		0.829639	-1.46806	0.361467	1.90233	-0.771718	0.440281	NA
B0403.12	B0403.12	0.953277	0	0	0	0	1.12453	0	0	0	0	0	0	0	0	0		0.115434	-0.913941	0.530733	5.2679	-0.173492	0.862264	NA		0.115434	0.303821	1.23441	5.2679	0.057674	0.954008	NA		0.115434	-0.884652	0.541618	5.26765	-0.167941	0.86663	NA		0.115434	-1.11267	0.462437	5.2679	-0.211217	0.832718	NA
B0403.13	B0403.13	0.953277	0	0	0	0	0	0	0	0	0	0	0	0	0	0		0.171341	-0.913941	0.530733	5.2679	-0.173492	0.862264	NA		0.171341	-0.657962	0.633773	5.2679	-0.1249	0.900603	NA		0.171341	-0.88464	0.541623	5.26765	-0.167938	0.866632	NA		0.171341	-1.11267	0.462437	5.2679	-0.211217	0.832718	NA
B0403.2	ubc-17	36.2245	60.9121	99.8498	79.8308	102.38	91.0871	48.0244	47.1927	35.8677	41.4859	38.0412	49.2819	63.4143	86.7026	62.3263		65.5602	-0.58821	0.665168	0.296357	-1.9848	0.0471663	0.149878		65.5602	0.472244	1.38727	0.28502	1.65688	0.0975445	0.173837		65.5602	-0.613364	0.653671	0.297353	-2.06275	0.0391366	0.0954036		65.5602	0.108388	1.07802	0.284072	0.381552	0.702794	0.779567
B0403.3	B0403.3	20.9721	11.9978	19.7816	17.8726	23.2683	20.2416	9.00457	14.1578	9.69398	10.1185	10.7296	9.85637	18.3568	18.7006	29.8825		18.9962	-0.676812	0.625546	0.412433	-1.64102	0.100793	0.241675		18.9962	0.221434	1.16589	0.384796	0.575458	0.564981	0.676545		18.9962	-0.778359	0.58303	0.419432	-1.85575	0.0634895	NA		18.9962	0.344831	1.27	0.367551	0.938185	0.34815	0.457365
B0403.4	pdi-6	11517.5	11831.7	10003.8	18126.4	17379.1	16689.2	14430.3	11017.6	13385.4	14797.3	15522.8	12494.9	9937.69	9915.55	10244.6		13419	0.219449	1.16429	0.120221	1.82538	0.0679437	0.188198		13419	0.646073	1.5649	0.120197	5.37512	7.65332e-08	9.26575e-07		13419	0.360294	1.28369	0.120205	2.99733	0.00272353	0.0130859		13419	-0.148164	0.902398	0.120248	-1.23215	0.217891	0.316845
B0403.5	B0403.5	568.153	530.674	804.451	399.154	536.334	584.757	377.191	503.074	397.453	530.209	578.422	564.77	963.731	1086.33	1144.93		698.434	-0.574451	0.671542	0.177692	-3.23285	0.0012256	0.0129254		698.434	-0.323627	0.799058	0.177707	-1.82112	0.0685883	0.130489		698.434	-0.185573	0.8793	0.176706	-1.05018	0.293637	0.421777		698.434	0.747354	1.67871	0.174768	4.27627	1.90055e-05	0.000113872
B0403.6	B0403.6	20.9721	22.1499	19.7816	10.7235	11.6341	17.9925	6.00305	23.5963	16.4798	22.2607	18.5329	14.7846	40.8856	29.7509	43.543		22.4862	-0.440805	0.736723	0.391409	-1.1262	0.260081	0.441766		22.4862	-0.636082	0.643458	0.411352	-1.54632	0.122027	0.208025		22.4862	-0.180104	0.882639	0.383065	-0.470166	0.638236	0.736031		22.4862	0.859946	1.81497	0.353584	2.43209	0.0150121	0.0346988
B0403.9	B0403.9	3.81311	6.46038	7.53584	5.95752	5.81707	7.87172	4.00203	0.943854	3.87759	3.03555	1.95083	2.95691	0.834399	4.25013	2.56136		4.37087	-1.023	0.492094	0.803857	-1.27261	0.203157	NA		4.37087	0.142335	1.10369	0.733805	0.193968	0.846201	NA		4.37087	-1.16804	0.445027	0.822053	-1.42088	0.155352	NA		4.37087	-1.22472	0.427881	0.804161	-1.52298	0.127764	NA
B0410.1	B0410.1	0	0.922911	6.59386	3.57451	1.16341	4.49813	1.00051	0.943854	0.969398	2.0237	1.95083	0	0	0	3.41514		1.96804	-1.36756	0.387547	1.38775	-0.985447	0.324404	NA		1.96804	0.299293	1.23054	1.22189	0.244942	0.806501	NA		1.96804	-0.921385	0.528002	1.32353	-0.696158	0.48633	NA		1.96804	-1.14482	0.452246	1.32292	-0.865373	0.386834	NA
B0410.2	vang-1	2074.33	2234.37	2142.06	2888.21	2679.34	2342.4	2788.42	1834.85	2466.15	2798.78	2394.65	2183.19	1567.84	1523.25	1391.67		2205.3	0.136037	1.09888	0.148664	0.915058	0.360161	0.545666		2205.3	0.294103	1.22612	0.148732	1.97741	0.0479956	0.0973311		2205.3	0.193425	1.14348	0.148646	1.30125	0.193174	0.310181		2205.3	-0.52508	0.694921	0.149026	-3.52341	0.000426031	0.00164695
B0410.3	B0410.3	426.115	292.563	367.372	212.088	191.963	226.031	196.1	342.619	223.931	278.259	315.059	370.6	466.429	310.259	430.308		316.517	-0.508892	0.702762	0.216444	-2.35115	0.0187154	0.0835885		316.517	-0.78508	0.58032	0.219156	-3.58229	0.0003406	0.00146868		316.517	-0.171734	0.887775	0.215264	-0.797786	0.424995	0.550587		316.517	0.15264	1.1116	0.213677	0.714347	0.475012	0.580506
B0412.1	dac-1	43.8507	37.8394	36.7372	70.2988	47.7	53.9775	35.0178	42.4734	30.0513	32.3792	25.3608	37.4542	55.9047	44.2013	46.9582		43.9508	-0.137328	0.909202	0.276238	-0.497136	0.619093	0.75987		43.9508	0.537227	1.45118	0.267544	2.008	0.0446437	0.0917597		43.9508	-0.31524	0.803717	0.281436	-1.12011	0.262665	0.389171		43.9508	0.313404	1.24264	0.263632	1.1888	0.23452	0.335581
B0412.2	daf-7	24.7852	22.1499	24.4915	120.342	148.917	111.329	20.0102	16.0455	14.541	20.237	24.3854	22.6697	10.8472	15.3005	7.68407		54.9934	-0.499203	0.707497	0.325703	-1.5327	0.125351	0.27799		54.9934	2.41389	5.3291	0.269115	8.96976	2.9717e-19	3.20703e-17		54.9934	-0.0844612	0.943137	0.310973	-0.271603	0.785927	0.852593		54.9934	-1.0773	0.473915	0.343683	-3.13458	0.00172101	0.00547498
B0412.3	trpp-11	4624.35	4571.18	3745.31	2984.72	2720.06	2679.76	3922.99	3513.02	3878.56	4253.82	3750.47	4077.58	3577.07	3877.82	3959		3504.74	-0.193801	0.874299	0.105077	-1.84437	0.0651285	0.183095		3504.74	-0.626206	0.647878	0.105595	-5.93024	3.02498e-09	5.31185e-08		3504.74	-0.0991239	0.9336	0.105039	-0.943687	0.34533	0.472737		3504.74	-0.181162	0.881992	0.104961	-1.726	0.084347	0.147276
B0412.4	rps-29	12537.5	10859	6481.76	3387.45	3090.03	3600.75	8128.13	10910.9	9942.14	11501.7	11093.4	12469.3	11992.8	12522.6	13369.4		8227.69	-0.043958	0.96999	0.186716	-0.235427	0.813877	0.892429		8227.69	-1.56784	0.337314	0.18717	-8.37653	5.45129e-17	4.35028e-15		8227.69	0.230914	1.17358	0.186687	1.23691	0.216122	0.33707		8227.69	0.342526	1.26797	0.186654	1.83509	0.0664929	0.120895
B0412.6	B0412.6	1.90655	0.922911	0.94198	3.57451	0	0	5.00254	3.77542	2.90819	6.0711	3.90166	2.95691	0.834399	0	0		1.82201	1.63337	3.10237	1.18674	1.37635	0.168714	NA		1.82201	-0.100111	0.932961	1.38658	-0.0721997	0.942443	NA		1.82201	1.77905	3.432	1.18107	1.50631	0.131988	NA		1.82201	-2.04897	0.241657	1.6195	-1.26518	0.205806	NA
B0412.7	B0412.7	10.486	9.22911	0.94198	3.57451	4.65366	3.3736	10.0051	5.66312	9.69398	9.10665	14.6312	12.8133	4.172	9.35028	9.39164		7.02758	0.292858	1.22506	0.621988	0.470841	0.637754	NA		7.02758	-0.833274	0.561254	0.717724	-1.161	0.245644	0.361824		7.02758	0.824568	1.771	0.602812	1.36787	0.171353	NA		7.02758	0.147514	1.10766	0.61965	0.238061	0.811834	0.864688
B0412.8	21ur-9579	0	0	0	1.1915	0	0	0	0	0	0	0	0	0	0	0		0.0661947	0	1	5.2679	0	1	NA		0.0661947	1.2656	2.40428	5.2679	0.240248	0.810138	NA		0.0661947	0	1	5.26765	0	1	NA		0.0661947	0	1	5.2679	0	1	NA
B0414.1	srz-4	5.71966	1.84582	10.3618	3.57451	3.49024	2.24906	9.00457	4.71927	5.81639	3.03555	3.90166	3.94255	3.3376	3.4001	1.70757		4.37103	0.123154	1.08911	0.694877	0.177232	0.859326	NA		4.37103	-0.945899	0.519106	0.799351	-1.18333	0.236677	NA		4.37103	-0.716155	0.608718	0.753987	-0.949824	0.342201	NA		4.37103	-1.0815	0.472538	0.766432	-1.41108	0.158221	NA
B0414.10	B0414.10	0	0	0	0	0	1.12453	0	0	0	0	0	0	0.834399	0	0		0.282483	0	1	4.62612	0	1	NA		0.282483	1.26561	2.40429	4.62612	0.273579	0.784409	NA		0.282483	0	1	4.62595	0	1	NA		0.282483	0.810899	1.7543	4.62612	0.175287	0.860854	NA
B0414.12	B0414.12	0.953277	0	0	0	0	0	0	0	0	0	0	0	0	0	0		0.0529598	-0.913941	0.530733	5.2679	-0.173492	0.862264	NA		0.0529598	-0.657962	0.633773	5.2679	-0.1249	0.900603	NA		0.0529598	-0.884666	0.541613	5.26765	-0.167943	0.866628	NA		0.0529598	-1.11267	0.462437	5.2679	-0.211217	0.832718	NA
B0414.2	rnt-1	161.104	200.272	230.785	380.09	400.215	338.484	213.108	310.528	293.727	168.979	242.879	207.969	287.033	324.71	269.796		268.596	0.465517	1.38081	0.185584	2.50839	0.0121283	0.0634081		268.596	0.917428	1.88874	0.184736	4.96615	6.82961e-07	6.31952e-06		268.596	0.0662517	1.04699	0.187872	0.352644	0.724356	0.806317		268.596	0.573807	1.48845	0.184302	3.11341	0.0018494	0.00583229
B0414.3	hil-5	6092.39	6404.08	5216.68	5620.33	5007.34	5450.61	8060.09	4402.13	6048.07	7178.06	7881.36	5078.99	2228.68	2696.28	2229.23		5315.34	0.063456	1.04497	0.196787	0.322461	0.747104	0.848298		5315.34	-0.139715	0.907698	0.196891	-0.709607	0.477948	0.598597		5315.34	0.185125	1.13692	0.196769	0.940821	0.346797	0.473986		5315.34	-1.30797	0.403889	0.197134	-6.63491	3.24691e-11	9.90861e-10
B0414.5	cpb-3	1475.67	1746.15	1608.9	1925.47	1622.96	1541.73	1723.88	832.479	1362.97	1538.01	836.907	1098	537.353	514.265	450.799		1327.38	-0.301839	0.811218	0.229235	-1.31672	0.187931	0.358816		1327.38	0.0753996	1.05365	0.229144	0.329049	0.742119	0.820244		1327.38	-0.476235	0.718851	0.229405	-2.07596	0.0378979	0.0931914		1327.38	-1.68494	0.311017	0.230662	-7.30479	2.77699e-13	1.42178e-11
B0414.6	glh-3	682.546	746.635	640.546	509.964	450.241	401.458	840.427	475.702	696.997	870.191	529.651	591.382	300.384	305.159	268.942		545.085	-0.0404128	0.972377	0.202747	-0.199326	0.842008	0.911126		545.085	-0.604385	0.657752	0.204634	-2.95349	0.00314204	0.00998473		545.085	-0.0560742	0.961878	0.202825	-0.276466	0.78219	0.849981		545.085	-1.24293	0.422513	0.205221	-6.05656	1.39063e-09	2.81069e-08
B0414.7	mtk-1	1977.1	2425.41	2704.42	3064.55	2743.33	2647.15	2912.48	1693.27	2381.81	2368.74	1591.88	1971.27	1968.35	1923.61	1804.05		2299.86	-0.0245793	0.983107	0.185482	-0.132516	0.894576	0.943027		2299.86	0.250531	1.18965	0.185472	1.35078	0.176767	0.279688		2299.86	-0.260823	0.834612	0.18564	-1.405	0.160022	0.269895		2299.86	-0.319288	0.801465	0.185536	-1.7209	0.0852696	0.148551
B0414.8	vps-51	875.108	1077.96	909.01	941.289	901.646	831.029	988.502	873.065	985.877	870.191	774.48	840.749	721.755	697.021	707.788		832.128	-0.00777707	0.994624	0.111486	-0.0697586	0.944386	0.971323		832.128	-0.0985211	0.93399	0.112347	-0.876934	0.380523	0.505401		832.128	-0.203892	0.868205	0.112022	-1.82011	0.0687427	0.14488		832.128	-0.42871	0.742926	0.112014	-3.82729	0.000129559	0.000591844
B0416.1	tmc-2	415.629	631.271	1101.17	1295.17	1432.16	1263.97	536.272	436.06	558.373	449.261	336.519	437.623	786.838	836.425	818.78		803.25	-0.489003	0.712517	0.242588	-2.01578	0.0438233	0.142585		803.25	0.893766	1.85802	0.241108	3.70691	0.000209801	0.000967236		803.25	-0.812305	0.569471	0.24334	-3.33815	0.000843377	0.0054878		803.25	0.184998	1.13682	0.241349	0.766516	0.443369	0.550369
B0416.10	B0416.10	15.2524	6.46038	8.47782	3.57451	3.49024	4.49813	9.00457	10.3824	11.6328	11.1304	7.80333	12.8133	15.0192	9.35028	6.83028		8.24045	0.0429002	1.03018	0.538086	0.0797274	0.936454	NA		8.24045	-1.37911	0.384456	0.657829	-2.09645	0.0360419	0.0770133		8.24045	0.074541	1.05303	0.537984	0.138556	0.889801	NA		8.24045	0.0522823	1.0369	0.529896	0.0986654	0.921404	0.944634
B0416.11	B0416.11	0	0	0	0	0	0	1.00051	0	0	0	0	0	0	0	0		0.0555838	1.00963	2.01339	5.2679	0.191656	0.848012	NA		0.0555838	0	1	5.2679	0	1	NA		0.0555838	0	1	5.26765	0	1	NA		0.0555838	0	1	5.2679	0	1	NA
B0416.2	B0416.2	0	0	0	0	0	0	0	0	0	0	0.975416	0	0.834399	1.70005	0.853785		0.242425	0	1	4.09498	0	1	NA		0.242425	0	1	4.09498	0	1	NA		0.242425	1.03886	2.0546	4.09486	0.253697	0.799729	NA		0.242425	2.70846	6.53621	3.98762	0.679216	0.497001	NA
B0416.3	B0416.3	14.2992	12.9208	9.4198	9.53204	20.9415	13.4944	13.0066	10.3824	10.6634	9.10665	15.6067	12.8133	23.3632	26.3508	13.6606		15.4037	-0.10734	0.928298	0.446938	-0.240168	0.8102	0.889971		15.4037	0.264776	1.20145	0.441767	0.599356	0.548936	0.662652		15.4037	0.0373343	1.02622	0.441798	0.0845055	0.932655	NA		15.4037	0.791381	1.73073	0.410002	1.93019	0.0535838	0.100946
B0416.4	B0416.4	1124.87	818.622	455.918	238.301	216.395	200.167	651.331	982.552	799.753	892.452	917.867	1141.37	384.658	329.81	279.188		559.686	0.0206486	1.01442	0.246071	0.0839133	0.933125	0.965761		559.686	-1.87362	0.272887	0.251808	-7.44069	1.00157e-13	4.75552e-12		559.686	0.298938	1.23024	0.245803	1.21617	0.223921	0.34651		559.686	-1.2717	0.414171	0.247977	-5.12831	2.9235e-07	2.98999e-06
B0416.5	B0416.5	7418.4	8217.6	7451.06	15798.2	14048.2	13363.9	10245.2	6327.6	8774.02	10250	7400.48	7715.57	5910.05	5787.82	5361.77		9568.57	0.134676	1.09785	0.163711	0.822646	0.41071	0.591855		9568.57	0.904277	1.87161	0.163638	5.52609	3.27452e-08	4.39655e-07		9568.57	0.135791	1.09869	0.163716	0.829432	0.40686	0.53338		9568.57	-0.436499	0.738926	0.163782	-2.66511	0.00769624	0.0197435
B0416.6	gly-13	485.218	521.445	640.546	619.583	621.263	610.621	581.295	506.849	557.404	554.494	616.463	601.239	554.041	602.668	543.007		563.26	-0.00175095	0.998787	0.130546	-0.0134125	0.989299	0.995881		563.26	0.168587	1.12396	0.130834	1.28856	0.197551	0.30491		563.26	0.105626	1.07596	0.130298	0.810651	0.417566	0.543767		563.26	0.0452323	1.03185	0.129807	0.348459	0.727495	0.7993
B0416.7	B0416.7	7.62622	2.76873	6.59386	1.1915	2.32683	3.3736	6.00305	9.43854	1.9388	3.03555	1.95083	2.95691	5.84079	3.4001	3.41514		3.66815	0.0390474	1.02744	0.737734	0.0529288	0.957789	NA		3.66815	-1.28956	0.409076	0.881	-1.46374	0.143264	NA		3.66815	-1.09578	0.467884	0.829579	-1.32088	0.186541	NA		3.66815	-0.419978	0.747436	0.753118	-0.557653	0.577081	NA
B0416.8	B0416.8	0	0	0	1.1915	0	2.24906	1.00051	0	0	0	0	0	0.834399	0	0.853785		0.919196	1.00964	2.01341	2.12417	0.475309	0.634567	NA		0.919196	2.73748	6.66906	1.95517	1.40012	0.161476	NA		0.919196	0	1	2.12415	0	1	NA		0.919196	1.70529	3.26094	2.04116	0.83545	0.403464	NA
B0416.9	B0416.9	0	0	0	0	0	0	0	0.943854	0.969398	0	0	0.985637	0	0.850026	0.853785		0.543741	1.89197	3.71141	2.45407	0.770953	0.440735	NA		0.543741	0	1	2.52178	0	1	NA		0.543741	1.03888	2.05463	2.52176	0.411966	0.680365	NA		0.543741	1.71316	3.27879	2.45111	0.698933	0.484594	NA
B0432.1	B0432.1	40.0376	31.379	27.3174	11.915	13.961	13.4944	34.0173	34.9226	32.9595	30.3555	38.0412	39.4255	17.5224	7.65023	13.6606		28.6805	0.0464788	1.03274	0.291219	0.159601	0.873196	0.929425		28.6805	-1.32454	0.399278	0.355275	-3.72819	0.000192856	0.000897884		28.6805	0.128863	1.09343	0.289984	0.444379	0.656768	0.750684		28.6805	-1.34343	0.394082	0.332051	-4.04586	5.21311e-05	0.000269995
B0432.10	B0432.10	1204.94	951.521	543.522	512.347	431.627	520.658	1144.58	1421.44	1285.42	1290.11	1593.83	1389.75	601.602	536.366	534.47		841.507	0.512567	1.42659	0.2094	2.44779	0.0143736	0.0707082		841.507	-0.882331	0.54249	0.212065	-4.16066	3.17331e-05	0.000184789		841.507	0.662615	1.58295	0.209299	3.16587	0.00154619	0.00869375		841.507	-0.690916	0.61946	0.210657	-3.27981	0.00103877	0.00355486
B0432.11	B0432.11	0	0	0.94198	0	0	0	0	0	0	0	0	0	0	0	0		0.111523	-0.913941	0.530733	5.2679	-0.173492	0.862264	NA		0.111523	-0.657962	0.633773	5.2679	-0.1249	0.900603	NA		0.111523	-0.884652	0.541618	5.26765	-0.167941	0.86663	NA		0.111523	-1.11267	0.462437	5.2679	-0.211217	0.832718	NA
B0432.13	trul-1	1043.84	907.222	870.389	924.608	788.795	852.395	1236.63	1023.14	1184.6	1263.8	1431.91	1153.2	545.697	504.065	431.162		895.753	0.287705	1.2207	0.130706	2.20116	0.0277249	0.106693		895.753	-0.137056	0.909373	0.132053	-1.03788	0.299325	0.42185		895.753	0.44814	1.36428	0.130511	3.43374	0.000595308	0.00425333		895.753	-0.929702	0.524967	0.132989	-6.9908	2.73315e-12	1.09057e-10
B0432.14	B0432.14	66.7294	43.3768	32.9693	27.4046	32.5756	25.8642	33.0168	43.4173	39.7453	40.474	45.8446	38.4399	46.7264	52.7016	60.6188		45.9994	-0.29778	0.813503	0.286801	-1.03828	0.299138	0.483905		45.9994	-0.736441	0.600218	0.30496	-2.41488	0.0157406	0.0389232		45.9994	-0.196198	0.872848	0.285314	-0.687655	0.49167	0.610595		45.9994	0.162405	1.11915	0.275468	0.589559	0.555486	0.653753
B0432.16	B0432.16	0	0	0.94198	0	0	0	0	0	0	0	0	0	0	0	0		0.0523322	-0.913941	0.530733	5.2679	-0.173492	0.862264	NA		0.0523322	-0.657962	0.633773	5.2679	-0.1249	0.900603	NA		0.0523322	-0.884666	0.541613	5.26765	-0.167943	0.866628	NA		0.0523322	-1.11267	0.462437	5.2679	-0.211217	0.832718	NA
B0432.17	B0432.17	0	0.922911	2.82594	0	0	0	0	0	0	1.01185	0.975416	0	0.834399	0	0.853785		0.585421	-2.80749	0.142843	2.20793	-1.27155	0.203533	NA		0.585421	-2.55151	0.170576	2.20793	-1.15561	0.24784	NA		0.585421	-0.91827	0.529143	2.12753	-0.431613	0.666023	NA		0.585421	-1.15048	0.450475	2.12827	-0.540572	0.588802	NA
B0432.18	B0432.18	0	0	0.94198	0	0	0	0	0	0	0	0	0	0	0	0		0.0523322	-0.913941	0.530733	5.2679	-0.173492	0.862264	NA		0.0523322	-0.657962	0.633773	5.2679	-0.1249	0.900603	NA		0.0523322	-0.884666	0.541613	5.26765	-0.167943	0.866628	NA		0.0523322	-1.11267	0.462437	5.2679	-0.211217	0.832718	NA
B0432.19	B0432.19	0	0.922911	0	0	0	0	0	0	0	0	0	0	0.834399	0	0		0.0976284	-0.913941	0.530733	5.2679	-0.173492	0.862264	NA		0.0976284	-0.657962	0.633773	5.2679	-0.1249	0.900603	NA		0.0976284	-0.884652	0.541618	5.26765	-0.167941	0.86663	NA		0.0976284	-0.150887	0.900697	5.2679	-0.0286426	0.97715	NA
B0432.2	djr-1.1	3920.83	2640.45	1651.29	1963.6	1552	1729.53	2811.43	4407.8	3913.46	3662.9	3498.82	4034.21	2275.41	1831.81	1907.36		2552.04	0.438961	1.35563	0.233732	1.87805	0.0603738	0.175023		2552.04	-0.646858	0.63867	0.234327	-2.76049	0.00577152	0.0167528		2552.04	0.447093	1.36329	0.233738	1.9128	0.0557741	0.123925		2552.04	-0.449333	0.732381	0.23397	-1.92048	0.0547978	0.102855
B0432.3	mrpl-41	1683.49	1210.86	613.229	685.115	643.368	654.478	1132.57	2405.88	1877.72	1559.26	1667.96	1811.6	1496.91	1330.29	1331.91		1201.55	0.62693	1.54428	0.277406	2.25997	0.0238231	0.0970759		1201.55	-0.822804	0.565342	0.278924	-2.94992	0.00317852	0.0100875		1201.55	0.522653	1.4366	0.277471	1.88363	0.0596151	0.130552		1201.55	0.24584	1.18578	0.277497	0.885921	0.37566	0.484708
B0432.4	misc-1	2461.36	1984.26	1664.48	1690.75	1453.1	1537.24	2679.36	2716.41	2814.16	2874.67	3303.73	3004.22	1685.49	1539.4	1455.7		2039.5	0.426233	1.34372	0.133225	3.19936	0.00137734	0.0140406		2039.5	-0.384369	0.766114	0.134232	-2.86346	0.00419041	0.0127787		2039.5	0.587793	1.50295	0.133144	4.41473	1.01136e-05	0.000261542		2039.5	-0.384418	0.766088	0.133712	-2.87498	0.00404057	0.0113459
B0432.5	cat-2	30.5049	35.0706	46.157	16.6811	24.4317	19.117	22.0112	25.4841	17.4492	22.2607	27.3116	23.6553	29.204	42.5013	45.2506		32.8527	-0.781828	0.581629	0.311247	-2.51192	0.0120077	0.0631173		32.8527	-0.890978	0.539249	0.325313	-2.73884	0.0061657	0.0177412		32.8527	-0.608866	0.655712	0.306475	-1.98667	0.046959	0.108744		32.8527	0.064729	1.04589	0.284339	0.227647	0.819921	0.870247
B0432.7	B0432.7	564.34	865.691	1180.3	1484.62	1489.17	1321.32	825.419	450.218	702.813	676.928	365.781	537.172	734.271	803.274	757.308		931.437	-0.400158	0.757776	0.253755	-1.57695	0.114808	0.262162		931.437	0.718387	1.64534	0.252847	2.84119	0.00449451	0.013532		931.437	-0.724669	0.605136	0.254313	-2.84952	0.00437859	0.0187		931.437	-0.185885	0.879109	0.253253	-0.733992	0.462953	0.568702
B0432.8	B0432.8	387.984	373.779	314.621	486.134	392.071	401.458	427.217	369.047	426.535	446.226	368.707	361.729	197.753	176.805	175.026		350.029	0.183728	1.13581	0.153118	1.19991	0.230174	0.409395		350.029	0.249171	1.18852	0.153878	1.61928	0.105388	0.185174		350.029	0.128211	1.09294	0.153443	0.835559	0.403403	0.530183		350.029	-0.969577	0.510656	0.158099	-6.13271	8.6394e-10	1.84026e-08
B0432.9	B0432.9	199.235	139.36	98.9079	70.2988	69.8049	78.7172	198.101	262.391	225.87	206.417	200.936	227.682	127.663	107.103	99.8929		137.07	0.650657	1.56988	0.21656	3.00451	0.00266005	0.0224525		137.07	-0.998459	0.500535	0.234476	-4.25825	2.06034e-05	0.000126042		137.07	0.538025	1.45198	0.21726	2.47641	0.0132712	0.0427619		137.07	-0.385811	0.765349	0.221844	-1.73911	0.082016	0.143722
B0454.1	lin-8	960.903	964.442	898.649	959.161	943.529	820.908	949.482	881.559	1002.36	960.246	812.522	756.969	695.055	716.572	689.859		864.482	0.00467609	1.00325	0.111104	0.0420874	0.966429	0.982908		864.482	-0.0525438	0.964235	0.11188	-0.469644	0.638609	0.73834		864.482	-0.159015	0.895636	0.111562	-1.42535	0.154055	0.262634		864.482	-0.426346	0.744144	0.111663	-3.81815	0.000134454	0.00061086
B0454.10	sri-30	5.71966	5.53747	13.1877	17.8726	6.98049	14.6189	3.00152	5.66312	5.81639	6.0711	1.95083	7.8851	9.17839	7.65023	13.6606		8.963	-0.749668	0.594741	0.619577	-1.20997	0.226291	NA		8.963	0.691025	1.61443	0.553166	1.24922	0.211585	0.321952		8.963	-0.622219	0.649671	0.61215	-1.01645	0.309416	NA		8.963	0.31882	1.24731	0.550081	0.579587	0.562193	0.660001
B0454.11	21ur-14095	0	0	0	0	0	0	0	0	0	0	0	0	0	0	0		0.0571906	0	1	5.2679	0	1	NA		0.0571906	0	1	5.2679	0	1	NA		0.0571906	0	1	5.26765	0	1	NA		0.0571906	0	1	5.2679	0	1	NA
B0454.13	B0454.13	0	0	0	0	0	0	0	0	0	0	0	0	0	0.850026	0		0.0472236	0	1	5.2679	0	1	NA		0.0472236	0	1	5.2679	0	1	NA		0.0472236	0	1	5.26765	0	1	NA		0.0472236	0.810897	1.7543	5.2679	0.153932	0.877664	NA
B0454.18	B0454.18	1.90655	3.69164	7.53584	7.14903	12.7976	10.1208	6.00305	3.77542	2.90819	5.05925	3.90166	2.95691	5.84079	6.8002	12.8068		6.16847	-0.0559105	0.961987	0.70449	-0.0793631	0.936744	NA		6.16847	1.19545	2.29016	0.64549	1.852	0.0640261	0.123504		6.16847	-0.143516	0.90531	0.713998	-0.201004	0.840696	NA		6.16847	0.951556	1.93396	0.636989	1.49383	0.135219	0.216937
B0454.2	sri-31	5.71966	5.53747	5.65188	1.1915	2.32683	4.49813	4.00203	4.71927	3.87759	8.0948	3.90166	5.91382	4.172	3.4001	5.12271		4.88375	-0.422899	0.745924	0.680987	-0.62101	0.534593	NA		4.88375	-1.06332	0.478528	0.775726	-1.37075	0.170454	0.271468		4.88375	0.0797006	1.0568	0.647247	0.123138	0.901998	NA		4.88375	-0.413752	0.750668	0.665019	-0.622166	0.533833	0.634526
B0454.26	B0454.26	0.953277	0.922911	1.88396	0	1.16341	0	2.00102	0	0	0	0.975416	1.97127	0	1.70005	0		0.816423	-0.932609	0.52391	1.83888	-0.507163	0.612041	NA		0.816423	-1.59279	0.331529	1.93465	-0.823298	0.410339	NA		0.816423	-0.345828	0.786856	1.74715	-0.197939	0.843093	NA		0.816423	-1.14839	0.451129	1.84219	-0.623381	0.533034	NA
B0454.3	sri-28	0	0	0.94198	2.38301	1.16341	0	0	0	0	0	0	0.985637	0	1.70005	0		0.515636	-0.913951	0.53073	2.58525	-0.353526	0.723694	NA		0.515636	1.80536	3.49516	2.44539	0.738269	0.460351	NA		0.515636	0.0770842	1.05488	2.58522	0.0298173	0.976213	NA		0.515636	0.749491	1.6812	2.51663	0.297816	0.765844	NA
B0454.4	sri-29	0.953277	0.922911	1.88396	4.76602	4.65366	3.3736	3.00152	0	0.969398	0	0.975416	0.985637	3.3376	5.10015	1.70757		2.33223	0.0578543	1.04092	1.24296	0.0465456	0.962875	NA		2.33223	1.76532	3.39949	1.1033	1.60004	0.109591	NA		2.33223	-0.926273	0.526216	1.43915	-0.643626	0.519818	NA		2.33223	1.43316	2.70038	1.0963	1.30727	0.191122	NA
B0454.5	B0454.5	23.8319	10.152	4.7099	11.915	9.30732	15.7434	18.0091	45.305	31.9901	29.3437	25.3608	30.5548	37.548	26.3508	28.1749		21.3892	1.30621	2.4729	0.458263	2.85034	0.00436728	0.0317091		21.3892	-0.0605835	0.958876	0.504	-0.120205	0.904321	0.936117		21.3892	1.14245	2.20756	0.461554	2.47522	0.0133153	0.0428748		21.3892	1.2541	2.38518	0.456023	2.75007	0.00595819	0.0158815
B0454.6	B0454.6	59.1032	92.2911	151.659	159.662	198.944	123.699	72.0366	68.9013	67.8578	60.711	49.7462	57.167	100.128	142.804	136.606		105.837	-0.537909	0.688769	0.2774	-1.93911	0.0524878	0.160079		105.837	0.669586	1.59062	0.268841	2.49064	0.0127514	0.0326929		105.837	-0.855084	0.552833	0.282094	-3.03121	0.00243579	0.0120813		105.837	0.324135	1.25191	0.26816	1.20874	0.226763	0.326821
B0454.7	clec-2	0.953277	0.922911	0	0	0	0	0	0	0	0	0	0	5.0064	5.10015	2.56136		0.865196	-1.80878	0.285433	2.22501	-0.812929	0.416259	NA		0.865196	-1.5528	0.340849	2.22501	-0.697882	0.485251	NA		0.865196	-1.77952	0.29128	2.22499	-0.799788	0.423834	NA		0.865196	2.75479	6.74956	1.92408	1.43174	0.152218	NA
B0454.8	B0454.8	71.4958	77.5245	72.5324	90.5544	110.524	98.9588	83.0422	91.5538	69.7966	84.9954	81.9349	87.7217	46.7264	52.7016	45.2506		73.8152	0.1418	1.10328	0.199698	0.710074	0.477658	0.649435		73.8152	0.437579	1.35433	0.199134	2.19741	0.0279913	0.0627617		73.8152	0.200505	1.1491	0.199278	1.00615	0.314341	0.441772		73.8152	-0.615168	0.652854	0.209247	-2.93991	0.00328308	0.00950047
B0454.9	lido-13	763.575	760.479	509.611	582.646	547.968	529.655	818.415	806.995	840.468	952.151	1111	778.653	622.462	572.917	568.621		679.498	0.277974	1.21249	0.15841	1.75478	0.0792977	0.206899		679.498	-0.292845	0.816291	0.160399	-1.82572	0.0678917	0.129418		679.498	0.482736	1.39739	0.158113	3.05311	0.00226482	0.011424		679.498	-0.20522	0.867407	0.158972	-1.29092	0.196733	0.292697
B0457.1	lat-1	4007.58	6258.26	7047.89	8926.76	9265.43	8082.01	6553.33	3995.33	6338.89	4450.12	3047.2	4083.5	4677.64	5319.46	4642.03		6165	-0.0360028	0.975354	0.211139	-0.170517	0.864604	0.924606		6165	0.601711	1.51752	0.211073	2.85072	0.00436202	0.013206		6165	-0.580217	0.668863	0.211277	-2.74623	0.00602839	0.0237025		6165	-0.242101	0.845513	0.211141	-1.14663	0.251533	0.355142
B0457.12	B0457.12	0	0	0	0	0	0	0	0	0.969398	0	0	0	0	0	0		0.113046	1.00963	2.01339	5.2679	0.191656	0.848012	NA		0.113046	0	1	5.2679	0	1	NA		0.113046	0	1	5.26765	0	1	NA		0.113046	0	1	5.2679	0	1	NA
B0457.13	B0457.13	0	0.922911	0.94198	3.57451	0	0	1.00051	0	0	1.01185	0.975416	0	0	0	0.853785		0.573494	-0.84174	0.55797	2.35195	-0.35789	0.720426	NA		0.573494	0.922369	1.89522	2.19659	0.41991	0.674551	NA		0.573494	0.085736	1.06123	2.27663	0.0376592	0.969959	NA		0.573494	-1.04047	0.486169	2.35195	-0.442386	0.65821	NA
B0457.16	B0457.16	1.90655	3.69164	4.7099	3.57451	8.1439	4.49813	4.00203	1.88771	3.87759	4.0474	2.92625	1.97127	2.5032	7.65023	5.12271		3.88663	-0.0850983	0.94272	0.814049	-0.104537	0.916743	NA		3.88663	0.652362	1.57174	0.777015	0.839574	0.401148	NA		3.88663	-0.209485	0.864846	0.82826	-0.252922	0.800329	NA		3.88663	0.563458	1.47781	0.755274	0.746031	0.455648	NA
B0457.17	B0457.17	0	0	0.94198	0	0	0	1.00051	0	0	0	0	0	0	0	0		0.107916	0.0478425	1.03372	5.2679	0.00908188	0.992754	NA		0.107916	-0.657962	0.633773	5.2679	-0.1249	0.900603	NA		0.107916	-0.884652	0.541618	5.26765	-0.167941	0.86663	NA		0.107916	-1.11267	0.462437	5.2679	-0.211217	0.832718	NA
B0457.19	B0457.19	1.90655	1.84582	3.76792	10.7235	9.30732	6.74719	2.00102	1.88771	2.90819	5.05925	0	0.985637	1.6688	5.10015	1.70757		3.73038	-0.145411	0.904122	0.947696	-0.153436	0.878054	NA		3.73038	1.83075	3.55722	0.831284	2.20231	0.0276431	NA		3.73038	-0.330521	0.795249	0.972505	-0.339866	0.733958	NA		3.73038	0.171876	1.12652	0.899292	0.191124	0.848428	NA
B0457.2	B0457.2	77.2154	76.6016	143.181	54.8092	50.0268	59.6002	50.0254	110.431	60.1026	72.8532	79.9841	83.7792	161.873	154.705	162.219		89.7398	-0.427147	0.743731	0.316046	-1.35153	0.176524	0.343887		89.7398	-0.85243	0.553851	0.324666	-2.62556	0.00865058	0.023557		89.7398	-0.327597	0.796863	0.315355	-1.03882	0.298888	0.427096		89.7398	0.689097	1.61227	0.307264	2.24269	0.0249169	0.0530882
B0457.3	B0457.3	0	0.922911	0	0	0	0	0	0	0.969398	0	0	0	0	0	0.853785		0.326826	0.0478429	1.03372	2.98197	0.0160441	0.987199	NA		0.326826	-0.657968	0.63377	2.98197	-0.220649	0.825366	NA		0.326826	-0.884687	0.541605	2.98192	-0.296683	0.766708	NA		0.326826	-0.150888	0.900696	2.98197	-0.0506001	0.959644	NA
B0457.4	B0457.4	0	0	0	0	0	0	0	0	0	1.01185	0	0	0.834399	0	0.853785		0.150002	0	1	5.2679	0	1	NA		0.150002	0	1	5.2679	0	1	NA		0.150002	1.03883	2.05457	5.26765	0.19721	0.843663	NA		0.150002	1.70376	3.25749	5.23509	0.32545	0.744841	NA
B0457.6	B0457.6	240.226	203.04	244.915	140.598	182.656	186.672	147.075	215.199	128.93	159.872	183.378	185.3	456.416	402.062	535.323		252.24	-0.485038	0.714478	0.191409	-2.53404	0.0112756	0.0605073		252.24	-0.431408	0.741538	0.193019	-2.23505	0.0254142	0.0579619		252.24	-0.380236	0.768312	0.190859	-1.99223	0.0463455	0.107731		252.24	1.01835	2.0256	0.183819	5.53998	3.02514e-08	4.04574e-07
B0457.9	B0457.9	0	0	0	0	0	0	0	0.943854	0	0	0	0.985637	0	0	0		0.107194	1.00963	2.01339	5.2679	0.191656	0.848012	NA		0.107194	0	1	5.2679	0	1	NA		0.107194	1.03882	2.05455	5.26765	0.197208	0.843665	NA		0.107194	0	1	5.2679	0	1	NA
B0462.1	B0462.1	24.7852	37.8394	79.1263	65.5328	80.2756	71.97	26.0132	50.0243	36.8371	29.3437	20.4837	17.7415	35.8792	44.2013	42.6893		48.06	-0.326403	0.797522	0.358085	-0.911525	0.362019	0.547481		48.06	0.619513	1.53636	0.348468	1.77782	0.0754337	0.141058		48.06	-1.07076	0.476067	0.375374	-2.85252	0.00433736	0.0185691		48.06	-0.20785	0.865827	0.35312	-0.588609	0.556124	0.65424
B0462.2	sri-68	0.953277	0	2.82594	10.7235	5.81707	2.24906	2.00102	1.88771	0.969398	5.05925	1.95083	1.97127	7.50959	2.55008	3.41514		4.16803	0.367718	1.29031	1.12856	0.32583	0.744553	NA		4.16803	2.31209	4.96603	0.993265	2.32777	0.0199242	NA		4.16803	1.24922	2.37713	1.04307	1.19764	0.231057	NA		4.16803	1.84335	3.58842	0.993898	1.85467	0.0636438	NA
B0462.3	fbxb-119	899.893	806.624	503.959	345.536	253.624	312.62	777.395	892.886	807.508	943.044	1011.51	948.183	389.664	341.71	313.339		568.384	0.164809	1.12102	0.182337	0.90387	0.366064	0.551648		568.384	-1.27774	0.412441	0.187293	-6.82215	8.9687e-12	2.75886e-10		568.384	0.393097	1.31321	0.182048	2.1593	0.030827	0.0798221		568.384	-1.08111	0.472666	0.184707	-5.85311	4.82453e-09	8.14373e-08
B0462.4	B0462.4	28.5983	24.9186	12.2457	29.7876	15.1244	23.6152	60.0305	30.2033	19.388	58.6873	34.1396	53.2244	169.383	119.854	165.634		51.9726	0.734515	1.66384	0.411834	1.78352	0.0745016	0.199609		51.9726	0.0584583	1.04135	0.431716	0.135409	0.892288	0.928287		51.9726	1.1505	2.2199	0.406524	2.83008	0.00465364	0.0195134		51.9726	2.7903	6.91775	0.393706	7.08728	1.36771e-12	5.99183e-11
B0462.5	B0462.5	7.62622	4.61456	3.76792	8.34053	2.32683	8.99626	2.00102	7.55083	3.87759	4.0474	0	3.94255	5.0064	5.95018	6.83028		6.71402	-0.241124	0.846086	0.687768	-0.350589	0.725897	NA		6.71402	0.300387	1.23147	0.667982	0.449693	0.652932	0.749857		6.71402	-1.00888	0.496932	0.763683	-1.32107	0.186478	NA		6.71402	0.153187	1.11202	0.650131	0.235625	0.813723	0.865615
B0462.6	B0462.6	0	0	0	0	0	0	0	0	0.969398	0	0	0	0.834399	0.850026	0		0.147435	1.00963	2.01339	5.2679	0.191656	0.848012	NA		0.147435	0	1	5.2679	0	1	NA		0.147435	0	1	5.26765	0	1	NA		0.147435	1.7008	3.25081	5.2353	0.324871	0.745279	NA
B0464.1	dars-1	3964.68	3963.9	2868.33	4197.67	3671.74	3731.2	4822.45	3721.62	4378.77	4764.8	5327.72	4079.55	3221.62	3124.69	3009.59		3892.6	0.259246	1.19685	0.147632	1.75603	0.0790834	0.206564		3892.6	0.103545	1.07441	0.147807	0.700544	0.483587	0.604147		3892.6	0.392433	1.31261	0.147595	2.65885	0.00784078	0.0289208		3892.6	-0.20667	0.866535	0.147739	-1.39888	0.161848	0.249986
B0464.2	ctr-9	4269.73	4848.98	4752.29	4157.16	3778.77	3529.91	5545.82	3346.91	4716.12	5202.93	3373.96	4410.73	2937.09	2932.59	2672.35		3928.55	-0.0275905	0.981057	0.18825	-0.146563	0.883477	0.935468		3928.55	-0.274763	0.826586	0.188415	-1.45829	0.144761	0.239223		3928.55	-0.0949735	0.936289	0.188277	-0.504434	0.613956	0.716715		3928.55	-0.699424	0.615818	0.188403	-3.71238	0.000205318	0.000881536
B0464.3	nlp-36	2779.76	2179.92	1475.14	1472.7	1500.8	1592.34	1425.72	2835.34	2138.49	1866.86	1816.22	2032.38	2688.43	2310.37	2838.84		1960.41	-0.00778885	0.994616	0.221695	-0.0351331	0.971974	0.98621		1960.41	-0.494974	0.709575	0.222175	-2.22786	0.0258901	0.0588702		1960.41	-0.171006	0.888223	0.221797	-0.771003	0.440705	0.56537		1960.41	0.284541	1.21802	0.22149	1.28467	0.198908	0.295209
B0464.4	bre-3	819.818	909.99	887.345	1409.55	1541.52	1344.94	925.47	681.462	819.141	822.634	720.832	717.544	720.921	872.126	804.266		1001.71	-0.109842	0.926689	0.132097	-0.831529	0.405675	0.587577		1001.71	0.714881	1.64135	0.131065	5.4544	4.91373e-08	6.27054e-07		1001.71	-0.211239	0.863795	0.132395	-1.59552	0.110595	0.205529		1001.71	-0.126721	0.915911	0.131722	-0.962036	0.336032	0.444815
B0464.5	spk-1	7318.31	8234.21	9787.17	14586.4	14291.4	12703.8	9231.69	5320.5	7863.75	8663.46	5261.39	7167.55	6866.27	7175.07	6929.32		9167.28	-0.17691	0.884595	0.194901	-0.907691	0.364042	0.549633		9167.28	0.714539	1.64096	0.194819	3.66771	0.000244735	0.00110604		9167.28	-0.264699	0.832372	0.194921	-1.35798	0.17447	0.28781		9167.28	-0.273029	0.82758	0.194886	-1.40097	0.161222	0.249291
B0464.6	B0464.6	3406.06	3650.11	3058.61	4191.71	3777.61	3534.4	4581.33	2874.03	3830.09	4511.84	3503.69	3593.63	1927.46	1902.36	1604.26		3406.65	0.157901	1.11566	0.161507	0.977672	0.328236	0.512983		3406.65	0.185587	1.13728	0.161602	1.14842	0.250794	0.368007		3406.65	0.198753	1.14771	0.161502	1.23065	0.218453	0.340068		3406.65	-0.896348	0.537245	0.161955	-5.53455	3.12026e-08	4.15334e-07
B0464.7	baf-1	14231.5	9595.51	5497.39	5318.88	4553.61	4755.65	9660.9	14895	13211	12051.1	11808.4	13757.5	6434.05	5509.87	5541.92		8154.22	0.365036	1.28791	0.241094	1.51408	0.130004	0.28411		8154.22	-1.00336	0.498838	0.241325	-4.1577	3.21462e-05	0.000186811		8154.22	0.359293	1.2828	0.241096	1.49025	0.13616	0.239227		8154.22	-0.745903	0.596294	0.241191	-3.09258	0.00198426	0.00619212
B0464.8	tag-342	2955.16	2202.07	1504.34	1154.57	1020.31	1214.49	2668.35	3233.64	2968.3	2754.26	3305.69	3384.68	1444.34	1237.64	1030.52		1929.26	0.413181	1.33162	0.198408	2.08248	0.0372987	0.129013		1929.26	-0.974778	0.508818	0.199625	-4.88304	1.04461e-06	9.29645e-06		1929.26	0.503681	1.41783	0.198384	2.53892	0.0111196	0.0374596		1929.26	-0.843396	0.55733	0.199028	-4.23757	2.25952e-05	0.000131893
B0464.9	B0464.9	1428.01	1213.63	809.16	948.438	802.756	843.399	1575.8	1364.81	1478.33	1691.81	2031.79	1638.13	691.717	722.522	584.843		1106.7	0.356743	1.28053	0.174572	2.04353	0.0409997	0.136935		1106.7	-0.41148	0.751851	0.175921	-2.33901	0.0193352	0.0462178		1106.7	0.635836	1.55384	0.174363	3.64662	0.000265712	0.002387		1106.7	-0.787527	0.579336	0.17578	-4.48018	7.45804e-06	5.06075e-05
B0478.1	jnk-1	513.816	490.989	667.864	507.581	552.622	517.285	418.212	562.537	447.862	401.705	589.151	515.488	808.533	787.124	829.026		564.099	-0.227039	0.854387	0.163627	-1.38754	0.165276	0.329598		564.099	-0.0844442	0.943148	0.16398	-0.514967	0.606576	0.711425		564.099	-0.150692	0.900818	0.163487	-0.921733	0.356668	0.484184		564.099	0.535704	1.44965	0.16151	3.31685	0.000910396	0.00317044
B0478.11	21ur-12264	0	0	0	0	0	1.12453	0	0	0	0	0	0	0	0	0		0.062474	0	1	5.2679	0	1	NA		0.062474	1.2656	2.40428	5.2679	0.240248	0.810138	NA		0.062474	0	1	5.26765	0	1	NA		0.062474	0	1	5.2679	0	1	NA
B0478.12	21ur-7857	0	0	1.88396	1.1915	0	1.12453	0	0	0	0	0	0.985637	1.6688	0	0		0.667449	-1.81253	0.284692	2.47751	-0.731593	0.464417	NA		0.667449	0.299772	1.23095	2.40671	0.124557	0.900874	NA		0.667449	-0.821486	0.565859	2.47748	-0.331581	0.740205	NA		0.667449	-0.166307	0.891121	2.40841	-0.0690528	0.944948	NA
B0478.13	21ur-6930	0	0	0.94198	0	0	0	0	0	0	0	0	0	0	0	0		0.0523322	-0.913941	0.530733	5.2679	-0.173492	0.862264	NA		0.0523322	-0.657962	0.633773	5.2679	-0.1249	0.900603	NA		0.0523322	-0.884666	0.541613	5.26765	-0.167943	0.866628	NA		0.0523322	-1.11267	0.462437	5.2679	-0.211217	0.832718	NA
B0478.15	21ur-9097	0	0.922911	0	0	0	0	0	0	0	0	0	0	0	0	0		0.0512728	-0.913941	0.530733	5.2679	-0.173492	0.862264	NA		0.0512728	-0.657962	0.633773	5.2679	-0.1249	0.900603	NA		0.0512728	-0.884666	0.541613	5.26765	-0.167943	0.866628	NA		0.0512728	-1.11267	0.462437	5.2679	-0.211217	0.832718	NA
B0478.17	21ur-9300	0	0	0	0	0	0	0	0	0	0	0	0	0.834399	0	0		0.0463555	0	1	5.2679	0	1	NA		0.0463555	0	1	5.2679	0	1	NA		0.0463555	0	1	5.26765	0	1	NA		0.0463555	0.810897	1.7543	5.2679	0.153932	0.877664	NA
B0478.18	21ur-8824	1.90655	0	1.88396	0	0	2.24906	1.00051	0	0	2.0237	0.975416	1.97127	2.5032	0.850026	1.70757		1.23774	-1.85378	0.276666	1.65961	-1.117	0.263994	NA		1.23774	-0.714839	0.609273	1.55457	-0.459831	0.645637	NA		1.23774	0.395588	1.31548	1.33504	0.296311	0.766992	NA		1.23774	0.425932	1.34344	1.30928	0.325317	0.744941	NA
B0478.24	B0478.24	0	0	0	0	0	0	0	0	0	0	0	0	0	0	0.853785		0.0474325	0	1	5.2679	0	1	NA		0.0474325	0	1	5.2679	0	1	NA		0.0474325	0	1	5.26765	0	1	NA		0.0474325	0.810897	1.7543	5.2679	0.153932	0.877664	NA
B0478.25	B0478.25	0	0	0	0	0	1.12453	0	0.943854	0	0	0	0	0	0.850026	0.853785		0.383832	1.00964	2.0134	2.65298	0.380566	0.703525	NA		0.383832	1.26562	2.4043	2.65298	0.477054	0.633323	NA		0.383832	0	1	2.65295	0	1	NA		0.383832	1.71356	3.27969	2.58585	0.662668	0.507543	NA
B0478.3	B0478.3	61.0097	56.2976	57.4608	52.4262	59.3342	50.6039	33.0168	75.5083	51.3781	30.3555	46.82	51.2531	71.7583	59.5018	87.0861		61.0065	-0.12487	0.917087	0.292998	-0.426181	0.669976	0.796694		61.0065	-0.106273	0.928985	0.296822	-0.358037	0.720316	0.803086		61.0065	-0.442902	0.735653	0.298795	-1.48229	0.138263	0.242026		61.0065	0.321223	1.24939	0.285134	1.12657	0.259924	0.364087
B0478.5	21ur-12165	2.85983	1.84582	4.7099	2.38301	2.32683	1.12453	2.00102	0	0.969398	2.0237	1.95083	0	1.6688	2.55008	1.70757		1.91083	-1.68394	0.311232	1.17311	-1.43544	0.151161	NA		1.91083	-0.69486	0.617769	1.04938	-0.662163	0.507867	NA		1.91083	-1.24553	0.421752	1.09807	-1.13429	0.256672	NA		1.91083	-0.66684	0.629885	0.991515	-0.672547	0.501236	NA
B0478.7	21ur-8741	1.90655	1.84582	4.7099	2.38301	2.32683	1.12453	2.00102	0	0.969398	2.0237	1.95083	0	1.6688	2.55008	1.70757		1.85787	-1.53059	0.346135	1.19224	-1.2838	0.199212	NA		1.85787	-0.541666	0.686977	1.07076	-0.505873	0.612946	NA		1.85787	-1.0924	0.468981	1.11852	-0.976645	0.328745	NA		1.85787	-0.513735	0.700407	1.01412	-0.50658	0.61245	NA
B0491.1	pigm-1	600.565	630.348	575.55	832.862	778.324	915.369	745.378	595.572	762.916	869.179	908.112	779.639	589.92	638.369	573.744		713.141	0.219453	1.16429	0.124973	1.756	0.0790882	0.206564		713.141	0.484129	1.39874	0.12495	3.87457	0.000106812	0.000532746		713.141	0.501189	1.41538	0.124354	4.03033	5.56976e-05	0.000799545		713.141	-0.00361476	0.997498	0.125038	-0.0289092	0.976937	0.984722
B0491.10	B0491.10	0	0	0	0	0	0	1.00051	0	0	0	0	0	0	0	0		0.114774	1.00963	2.01339	5.2679	0.191656	0.848012	NA		0.114774	0	1	5.2679	0	1	NA		0.114774	0	1	5.26765	0	1	NA		0.114774	0	1	5.2679	0	1	NA
B0491.2	sqt-1	0	1.84582	0	0	2.32683	0	2.00102	0.943854	2.90819	1.01185	0.975416	0.985637	0	0.850026	0		0.82856	1.64857	3.13523	1.73638	0.949429	0.342402	NA		0.82856	0.317066	1.24579	1.9257	0.16465	0.86922	NA		0.82856	0.673177	1.59458	1.83383	0.367087	0.713554	NA		0.82856	-1.03569	0.487784	2.01414	-0.514207	0.607107	NA
B0491.3	rmd-3	0	1.84582	4.7099	2.38301	2.32683	2.24906	1.00051	0.943854	0.969398	1.01185	3.90166	0	2.5032	0.850026	2.56136		1.68921	-1.17222	0.443737	1.33008	-0.88132	0.378145	NA		1.68921	0.0838964	1.05988	1.19257	0.0703495	0.943915	NA		1.68921	-0.411749	0.751711	1.22199	-0.336949	0.736155	NA		1.68921	-0.149539	0.901539	1.1717	-0.127625	0.898446	NA
B0491.4	lgc-20	236.413	216.884	291.072	387.239	418.829	429.571	192.098	204.816	214.237	214.512	222.395	214.869	354.62	419.913	418.355		304.689	-0.28396	0.821333	0.145796	-1.94765	0.0514567	0.158125		304.689	0.731697	1.66059	0.141078	5.18647	2.14319e-07	2.26413e-06		304.689	-0.191314	0.875808	0.145307	-1.31662	0.187966	0.304153		304.689	0.680441	1.60263	0.139378	4.88197	1.05034e-06	9.14166e-06
B0491.5	nduf-11	4495.65	4614.56	4156.01	6071.91	5749.6	5595.67	4722.4	3674.42	3897.95	5857.6	6660.14	4175.16	3140.68	3368.65	3603.83		4760.99	-0.109769	0.926736	0.152202	-0.72121	0.47078	0.643932		4760.99	0.392735	1.31288	0.152117	2.5818	0.00982857	0.0262476		4760.99	0.331476	1.2583	0.152067	2.1798	0.0292725	0.0768149		4760.99	-0.39154	0.762316	0.152233	-2.57197	0.0101122	0.024893
B0491.6	B0491.6	874.155	892.455	994.73	896.012	892.339	934.486	1036.53	812.658	869.55	979.471	1066.13	949.169	909.495	897.627	865.738		902.785	-0.0228484	0.984287	0.112094	-0.203833	0.838484	0.909178		902.785	-0.0201712	0.986116	0.112729	-0.178935	0.857988	0.904103		902.785	0.11714	1.08458	0.111848	1.04732	0.294954	0.423121		902.785	-0.0469575	0.967976	0.111715	-0.420335	0.674241	0.754841
B0491.7	B0491.7	494.751	315.636	246.799	266.897	226.866	276.635	386.196	590.852	494.393	462.416	501.364	533.23	316.237	312.809	267.235		347.298	0.477626	1.39245	0.213962	2.2323	0.0255955	0.101839		347.298	-0.456182	0.728913	0.218035	-2.09225	0.0364165	0.0775991		347.298	0.502181	1.41635	0.213972	2.34695	0.0189277	0.0559754		347.298	-0.237873	0.847995	0.215339	-1.10464	0.269313	0.374002
B0491.8	clh-2	52.4302	59.0663	98.9079	51.2347	102.38	68.5964	24.0122	34.9226	22.2961	28.3318	35.115	40.4111	63.4143	60.3518	66.5953		60.6692	-1.37068	0.386708	0.314327	-4.3607	1.29649e-05	0.000524099		60.6692	0.0793841	1.05657	0.291238	0.272575	0.78518	0.852375		60.6692	-1.01763	0.493926	0.30628	-3.32256	0.000891948	0.00571329		60.6692	-0.144428	0.904738	0.288466	-0.500677	0.616599	0.706236
B0491.9	B0491.9	0	0	0	0	0	0	0	0	0	0	0	0	0	0	0		0.174266	0	1	5.2679	0	1	NA		0.174266	0	1	5.2679	0	1	NA		0.174266	0	1	5.26765	0	1	NA		0.174266	0	1	5.2679	0	1	NA
B0495.1	sre-1	5.71966	4.61456	5.65188	13.1066	5.81707	6.74719	11.0056	10.3824	12.6022	2.0237	5.8525	7.8851	8.34399	5.95018	11.0992		8.11996	1.08911	2.12742	0.571039	1.90724	0.05649	NA		8.11996	0.678983	1.60101	0.600813	1.13011	0.258431	0.376677		8.11996	-0.0139921	0.990348	0.630058	-0.0222076	0.982282	NA		8.11996	0.668344	1.58925	0.579636	1.15304	0.248894	0.351972
B0495.10	cpna-5	782.64	850.001	1162.4	1259.42	1298.37	1261.72	763.388	719.217	715.415	737.639	686.693	794.424	1239.92	1281.84	1311.41		1015.55	-0.346762	0.786347	0.133093	-2.60541	0.00917653	0.0528935		1015.55	0.450512	1.36653	0.132008	3.41276	0.000643083	0.00254983		1015.55	-0.333159	0.793796	0.133131	-2.5025	0.0123319	0.0405813		1015.55	0.455644	1.37139	0.131353	3.46886	0.000522674	0.00195864
B0495.13	B0495.13	0	0	0	0	0	0	0	0.943854	0	0	0	0	0	0	0		0.0524363	1.00963	2.01339	5.2679	0.191656	0.848012	NA		0.0524363	0	1	5.2679	0	1	NA		0.0524363	0	1	5.26765	0	1	NA		0.0524363	0	1	5.2679	0	1	NA
B0495.15	B0495.15	10.486	6.46038	12.2457	8.34053	8.1439	4.49813	2.00102	3.77542	0.969398	3.03555	2.92625	3.94255	6.67519	3.4001	7.68407		7.3763	-2.1034	0.232709	0.716997	-2.93363	0.00335028	NA		7.3763	-0.479513	0.71722	0.575912	-0.832614	0.405063	0.529676		7.3763	-1.55735	0.339776	0.65149	-2.39044	0.0168283	NA		7.3763	-0.714936	0.609232	0.561611	-1.27301	0.203015	0.299849
B0495.19	B0495.19	0	0	1.88396	4.76602	0	2.24906	1.00051	0	0	0	0	0.985637	0.834399	1.70005	0.853785		0.96854	-0.849899	0.554823	2.02033	-0.420673	0.673994	NA		0.96854	1.89527	3.71992	1.74331	1.08717	0.276962	NA		0.96854	-0.820653	0.566186	2.02032	-0.4062	0.684596	NA		0.96854	0.84836	1.80045	1.7928	0.473204	0.636068	NA
B0495.2	cdk-11.1	1417.52	1666.78	1480.79	1298.74	1243.69	1120.03	1983.01	1268.54	1626.65	1710.03	1357.78	1625.32	1007.12	1007.28	972.461		1350.37	0.0954305	1.06838	0.151293	0.630765	0.528194	0.691137		1350.37	-0.317996	0.802183	0.1521	-2.09071	0.0365544	0.0778139		1350.37	0.0397836	1.02796	0.151376	0.262813	0.792695	0.857658		1350.37	-0.612056	0.654264	0.151871	-4.03011	5.57519e-05	0.000285529
B0495.20	B0495.20	0	0	0	1.1915	0	1.12453	0	0	0	0	0	0	0	0.850026	0.853785		0.223325	0	1	4.23575	0	1	NA		0.223325	2.15984	4.46864	4.19477	0.514887	0.606632	NA		0.223325	0	1	4.23561	0	1	NA		0.223325	1.71562	3.28438	4.19385	0.40908	0.682481	NA
B0495.21	B0495.21	0	0	0	0	0	0	0	0.943854	0	0	0	0	0	0	0		0.0524363	1.00963	2.01339	5.2679	0.191656	0.848012	NA		0.0524363	0	1	5.2679	0	1	NA		0.0524363	0	1	5.26765	0	1	NA		0.0524363	0	1	5.2679	0	1	NA
B0495.22	B0495.22	0.953277	0	0	0	0	0	0	0	0	0	0	0	0.834399	0	0		0.0993153	-0.913941	0.530733	5.2679	-0.173492	0.862264	NA		0.0993153	-0.657962	0.633773	5.2679	-0.1249	0.900603	NA		0.0993153	-0.884652	0.541618	5.26765	-0.167941	0.86663	NA		0.0993153	-0.150887	0.900697	5.2679	-0.0286426	0.97715	NA
B0495.4	nhx-2	550.041	592.509	624.532	571.922	649.185	624.115	510.259	480.422	508.934	482.653	521.848	470.149	770.985	863.626	818.78		628.77	-0.237066	0.848469	0.104318	-2.27253	0.0230547	0.0952695		628.77	0.0625832	1.04433	0.104126	0.601036	0.547816	0.661778		628.77	-0.260955	0.834535	0.10456	-2.49575	0.0125691	0.0411105		628.77	0.473242	1.38823	0.101253	4.67388	2.95567e-06	2.27848e-05
B0495.5	B0495.5	716.864	650.652	608.519	717.286	681.761	611.745	849.431	682.406	776.487	854.002	754.972	652.492	612.449	589.918	543.007		683.979	0.223995	1.16796	0.130193	1.72048	0.0853446	0.216819		683.979	0.0249224	1.01742	0.131434	0.189618	0.849608	0.898594		683.979	0.194541	1.14436	0.130332	1.49265	0.135528	0.238385		683.979	-0.178927	0.883359	0.130703	-1.36897	0.17101	0.261359
B0495.6	moa-2	3980.88	2905.32	1671.07	1464.36	1173.89	1212.25	2452.24	3678.2	3485.95	3634.57	2938.93	3836.1	2253.71	1972.06	2075.55		2265.13	0.168403	1.12381	0.236057	0.713398	0.475599	0.647849		2265.13	-1.15215	0.449954	0.236938	-4.86266	1.15819e-06	1.01952e-05		2265.13	0.282697	1.21647	0.236031	1.19771	0.231031	0.354253		2265.13	-0.441474	0.736382	0.236204	-1.86904	0.0616175	0.113598
B0495.7	B0495.7	3379.37	4089.42	4320.86	5826.46	5516.91	5096.38	5210.65	2817.4	4170.35	4473.39	2881.38	3631.09	3284.2	3228.4	2937.02		4334.87	0.0490886	1.03461	0.194609	0.252242	0.800854	0.883105		4334.87	0.479643	1.3944	0.194561	2.46526	0.0136913	0.0347092		4334.87	-0.101922	0.931791	0.194666	-0.523576	0.600573	0.705365		4334.87	-0.319199	0.801515	0.194662	-1.63976	0.101056	0.171039
B0495.8	luc-7L	3770.21	3045.61	2631.89	1732.45	1711.38	1819.49	4078.07	4114.26	4275.04	4202.21	5095.57	4795.13	2096.01	1949.11	1800.63		2845.41	0.400162	1.31966	0.127188	3.14623	0.00165391	0.0160729		2845.41	-0.843912	0.557131	0.128348	-6.57519	4.85908e-11	1.28652e-09		2845.41	0.577003	1.49175	0.127126	4.53884	5.6565e-06	0.000178535		2845.41	-0.692508	0.618777	0.127733	-5.42151	5.90972e-08	7.23728e-07
B0495.9	B0495.9	1724.48	1361.29	841.188	854.309	792.285	727.572	1398.71	2379.46	1907.77	1686.75	1862.07	2012.67	1234.08	1124.58	1010.88		1270.68	0.534122	1.44806	0.220494	2.42239	0.0154186	0.0742903		1270.68	-0.726053	0.604556	0.221988	-3.27068	0.00107287	0.00396623		1270.68	0.502107	1.41628	0.220528	2.27684	0.022796	0.0638961		1270.68	-0.220807	0.858085	0.220872	-0.999707	0.317452	0.424752
B0496.1	B0496.1	0	0.922911	3.76792	1.1915	1.16341	2.24906	0	2.83156	2.90819	0	0	0.985637	2.5032	1.70005	0		1.41087	0.298278	1.22968	1.40469	0.212344	0.831838	NA		1.41087	-0.0229496	0.984218	1.46473	-0.0156682	0.987499	NA		1.41087	-2.13972	0.226925	1.73507	-1.23322	0.217495	NA		1.41087	-0.155305	0.897943	1.42856	-0.108714	0.913429	NA
B0496.10	21ur-15006	52.4302	61.8351	132.819	282.387	309.468	266.514	61.031	33.9787	54.2863	36.4266	30.2379	33.5117	85.9431	107.953	108.431		133.619	-0.729032	0.603309	0.289826	-2.51541	0.0118895	0.0627626		133.619	1.79658	3.47397	0.270651	6.638	3.17961e-11	8.74546e-10		133.619	-1.30304	0.405272	0.301722	-4.31867	1.56975e-05	0.000345996		133.619	0.290945	1.22344	0.276162	1.05353	0.292098	0.398354
B0496.11	B0496.11	13.3459	26.7644	68.7645	30.9791	41.8829	39.3586	26.0132	11.3262	25.2043	16.1896	10.7296	15.7702	30.0384	37.4011	37.5666		31.6853	-0.802941	0.57318	0.440208	-1.824	0.0681519	0.188534		31.6853	0.0441067	1.03104	0.427667	0.103133	0.917857	0.94556		31.6853	-1.35213	0.391713	0.457986	-2.95235	0.00315369	0.0146134		31.6853	-0.0526815	0.964143	0.422106	-0.124806	0.900677	0.929551
B0496.13	B0496.13	0.953277	1.84582	5.65188	1.1915	1.16341	4.49813	2.00102	0.943854	1.9388	3.03555	0	0	3.3376	4.25013	1.70757		2.213	-0.796606	0.575702	1.10398	-0.721577	0.470555	NA		2.213	-0.29087	0.817409	1.07367	-0.270912	0.786459	NA		2.213	-1.49884	0.353838	1.22188	-1.22666	0.21995	NA		2.213	0.137854	1.10027	0.9964	0.138352	0.889962	NA
B0496.14	B0496.14	0.953277	2.76873	0.94198	0	2.32683	2.24906	0	0	0	1.01185	0	0	0	0	0		0.804303	-3.12436	0.114676	2.0415	-1.53043	0.12591	NA		0.804303	-0.024178	0.983381	1.81808	-0.0132986	0.98939	NA		0.804303	-2.13333	0.227932	2.04148	-1.04499	0.296026	NA		0.804303	-3.3231	0.0999191	2.0415	-1.62778	0.103573	NA
B0496.15	B0496.15	0	0	0	0	0	0	0	0	0	0	0	0	0.834399	0.850026	0.853785		0.198202	0	1	4.36738	0	1	NA		0.198202	0	1	4.36738	0	1	NA		0.198202	0	1	4.36723	0	1	NA		0.198202	2.29185	4.89682	4.28722	0.534577	0.592943	NA
B0496.16	B0496.16	0	0	0	1.1915	0	0	0	0	0	0	0	0	0	0	0		0.123385	0	1	5.2679	0	1	NA		0.123385	1.2656	2.40428	5.2679	0.240248	0.810138	NA		0.123385	0	1	5.26765	0	1	NA		0.123385	0	1	5.2679	0	1	NA
B0496.17	B0496.17	0	0	0.94198	0	0	2.24906	0	0	0	0	0	0	0.834399	0	0		0.28152	-0.913946	0.530731	3.97794	-0.229754	0.818283	NA		0.28152	1.16176	2.2373	3.93765	0.295039	0.767964	NA		0.28152	-0.884662	0.541615	3.97783	-0.222398	0.824004	NA		0.28152	-0.150887	0.900696	3.97794	-0.037931	0.969743	NA
B0496.18	B0496.18	0	0	0	0	0	0	0	0	0.969398	0	0	0	0	0	0		0.111046	1.00963	2.01339	5.2679	0.191656	0.848012	NA		0.111046	0	1	5.2679	0	1	NA		0.111046	0	1	5.26765	0	1	NA		0.111046	0	1	5.2679	0	1	NA
B0496.2	B0496.2	9.53277	8.3062	9.4198	4.76602	12.7976	7.87172	15.0076	12.2701	6.78578	12.1422	17.5575	7.8851	11.6816	15.3005	11.953		10.9333	0.320171	1.24848	0.495712	0.645882	0.518356	0.683123		10.9333	-0.0968763	0.935055	0.53013	-0.18274	0.855002	0.902018		10.9333	0.465228	1.38054	0.491067	0.947382	0.343444	NA		10.9333	0.514656	1.42865	0.481204	1.06952	0.284837	0.39055
B0496.3	unc-82	1021.91	1566.18	3192.37	2776.21	3199.39	2784.34	1418.72	900.437	1168.12	1038.16	824.227	1065.47	1992.55	2193.07	2026.89		1941.78	-0.729183	0.603245	0.278111	-2.62192	0.0087437	0.0512319		1941.78	0.599727	1.51543	0.277564	2.16068	0.0307199	0.0675694		1941.78	-0.981375	0.506497	0.278335	-3.52588	0.000422082	0.00334338		1941.78	0.103979	1.07473	0.277578	0.374593	0.707963	0.783818
B0496.5	srtx-1	4.76638	3.69164	6.59386	1.1915	12.7976	6.74719	6.00305	12.2701	6.78578	4.0474	4.87708	7.8851	7.50959	13.6004	10.2454		7.92265	0.741151	1.67151	0.646618	1.1462	0.251714	NA		7.92265	0.46829	1.38347	0.673579	0.695226	0.486914	0.607111		7.92265	0.162169	1.11897	0.678431	0.239036	0.811078	NA		7.92265	1.05919	2.08376	0.627621	1.68763	0.0914825	0.157582
B0496.6	B0496.6	0.953277	0.922911	2.82594	4.76602	1.16341	3.3736	5.00254	0.943854	6.78578	3.03555	2.92625	2.95691	5.84079	5.95018	5.12271		3.21319	1.43227	2.69871	0.959489	1.49274	0.135505	NA		3.21319	0.982845	1.97636	1.01051	0.972626	0.330739	NA		3.21319	0.924609	1.89817	0.996231	0.928107	0.353352	NA		3.21319	1.84828	3.60072	0.930223	1.98693	0.0469305	NA
B0496.7	valv-1	753.089	562.053	360.778	362.218	332.737	347.48	310.157	930.64	458.525	381.468	492.585	541.115	1246.59	983.48	1325.07		566.272	0.0204443	1.01427	0.303964	0.0672588	0.946376	0.972146		566.272	-0.684971	0.622018	0.305812	-2.23985	0.0251008	0.0574168		566.272	-0.243848	0.84449	0.304405	-0.801065	0.423094	0.548984		566.272	1.08501	2.12139	0.302821	3.583	0.000339667	0.00135851
B0496.8	tes-1	640.602	671.879	714.963	664.86	727.134	763.557	778.395	771.129	749.344	640.501	833.005	751.056	1022.14	992.83	932.334		761.213	0.181203	1.13383	0.112977	1.60389	0.108739	0.253004		761.213	0.0886781	1.0634	0.114035	0.777638	0.436783	0.560546		761.213	0.134163	1.09746	0.113188	1.18531	0.235894	0.359579		761.213	0.539743	1.45371	0.111723	4.83109	1.35787e-06	1.14319e-05
B0507.1	B0507.1	681.593	732.791	1037.12	1508.45	1689.28	1548.48	565.287	510.625	533.169	527.174	431.134	489.862	1094.73	1192.59	1202.98		980.162	-0.607588	0.656293	0.147943	-4.10692	4.0097e-05	0.00114864		980.162	0.95312	1.93606	0.145393	6.55546	5.54703e-11	1.44393e-09		980.162	-0.759646	0.590641	0.148509	-5.11514	3.13508e-07	2.2852e-05		980.162	0.509659	1.42371	0.145379	3.50572	0.000455377	0.00174296
B0507.10	ddn-1	19.0655	20.304	27.3174	15.4896	29.0854	30.3624	19.0097	32.091	23.2655	25.2963	35.115	35.4829	28.3696	34.001	46.9582		28.398	0.160597	1.11775	0.347866	0.461665	0.644321	0.778766		28.398	0.17222	1.12679	0.354984	0.485147	0.627572	0.728674		28.398	0.525304	1.43924	0.339683	1.54645	0.121995	0.220539		28.398	0.712351	1.63847	0.331682	2.14769	0.0317383	0.0651556
B0507.11	srx-115	5.71966	1.84582	7.53584	4.76602	4.65366	6.74719	8.00406	6.60698	0.969398	4.0474	6.82791	8.87074	8.34399	8.50026	6.83028		5.47587	0.0462078	1.03255	0.719513	0.0642209	0.948794	NA		5.47587	0.104802	1.07535	0.732629	0.14305	0.886251	0.924412		5.47587	0.392664	1.31282	0.701465	0.559777	0.575632	NA		5.47587	0.652472	1.57186	0.679808	0.959788	0.337162	0.445894
B0507.12	21ur-14767	1.90655	2.76873	2.82594	4.76602	11.6341	8.99626	1.00051	1.88771	3.87759	3.03555	2.92625	3.94255	4.172	5.95018	7.68407		5.90007	-0.145881	0.903827	0.865029	-0.168643	0.866078	NA		5.90007	1.76067	3.38855	0.73853	2.38402	0.0171247	0.0418587		5.90007	0.399471	1.31902	0.811645	0.492175	0.622596	NA		5.90007	1.24375	2.36813	0.741353	1.67767	0.0934118	0.160337
B0507.13	B0507.13	0	0	0	0	0	0	0	0	0	0	0.975416	0	0.834399	0.850026	0		0.147769	0	1	5.2679	0	1	NA		0.147769	0	1	5.2679	0	1	NA		0.147769	1.03883	2.05457	5.26765	0.19721	0.843663	NA		0.147769	1.7008	3.25081	5.2353	0.324871	0.745279	NA
B0507.14	B0507.14	0	0	1.88396	0	1.16341	0	0	0.943854	0	0	0	0.985637	0	0.850026	0		0.439485	-0.851096	0.554363	2.83347	-0.300373	0.763893	NA		0.439485	-0.595115	0.661992	2.83347	-0.210031	0.833644	NA		0.439485	-0.821854	0.565714	2.83343	-0.290057	0.771773	NA		0.439485	-1.04983	0.483026	2.83347	-0.37051	0.711003	NA
B0507.15	B0507.15	0	0.922911	0.94198	1.1915	0	1.12453	0	0	0	0	0	0	1.6688	1.70005	4.26893		1.12159	-1.80591	0.286	1.91195	-0.944538	0.344895	NA		1.12159	0.306774	1.23694	1.81916	0.168635	0.866084	NA		1.12159	-1.77665	0.291859	1.91194	-0.929243	0.352763	NA		1.12159	2.02623	4.07338	1.58074	1.28182	0.199905	NA
B0507.16	linc-69	0	1.84582	0.94198	1.1915	0	0	0	0	0.969398	1.01185	0	0	0	1.70005	0		0.425589	-1.42063	0.373548	2.7707	-0.512735	0.608136	NA		0.425589	-1.16465	0.446071	2.7707	-0.420347	0.674232	NA		0.425589	-1.39139	0.381196	2.77065	-0.50219	0.615534	NA		0.425589	-0.718467	0.607743	2.70672	-0.265439	0.790672	NA
B0507.17	B0507.17	4.76638	1.84582	0.94198	0	1.16341	1.12453	3.00152	5.66312	2.90819	3.03555	4.87708	6.89946	2.5032	1.70005	3.41514		2.49505	0.623846	1.54098	0.928157	0.672135	0.501498	NA		2.49505	-1.70314	0.307117	1.31546	-1.29471	0.195421	NA		2.49505	0.977567	1.96914	0.909065	1.07535	0.282217	NA		2.49505	0.0160139	1.01116	0.958414	0.0167088	0.986669	NA
B0507.2	B0507.2	945.651	892.455	811.044	859.075	863.254	947.98	940.477	981.608	910.264	936.973	1110.02	1007.32	1051.34	1119.48	1086.87		974.113	0.0965961	1.06925	0.0996591	0.969265	0.332413	0.517064		974.113	0.0117783	1.0082	0.100609	0.11707	0.906804	0.938039		974.113	0.205566	1.15314	0.099466	2.0667	0.0387625	0.0946719		974.113	0.298335	1.22972	0.098787	3.01998	0.0025279	0.00761642
B0507.3	B0507.3	385.124	455.918	501.133	1033.03	1038.93	928.863	572.291	405.857	518.628	461.404	509.167	396.226	415.531	482.815	449.945		620.676	0.156605	1.11466	0.150623	1.03972	0.298472	0.483288		620.676	1.16055	2.23542	0.148797	7.79952	6.21448e-15	3.55669e-13		620.676	0.0261553	1.01829	0.151146	0.173047	0.862615	0.908668		620.676	0.00635338	1.00441	0.150473	0.0422226	0.966321	0.977128
B0507.4	B0507.4	0	0	0	0	1.16341	0	0	0.943854	0	0	0	0.985637	0.834399	2.55008	0.853785		0.465172	1.00964	2.0134	2.5557	0.395053	0.692804	NA		0.465172	1.26562	2.4043	2.5557	0.495214	0.620449	NA		0.465172	1.03887	2.05462	2.55567	0.406498	0.684377	NA		0.465172	3.03102	8.17389	2.35789	1.28548	0.198625	NA
B0507.5	B0507.5	0	0	0	0	0	0	0	0	0	0	0	1.97127	0	0	0.853785		0.214138	0	1	5.01649	0	1	NA		0.214138	0	1	5.01649	0	1	NA		0.214138	1.92775	3.80461	4.98211	0.386935	0.698805	NA		0.214138	0.810898	1.7543	5.01649	0.161646	0.871584	NA
B0507.6	B0507.6	0.953277	2.76873	4.7099	4.76602	2.32683	5.62266	0	5.66312	0.969398	1.01185	0.975416	5.91382	9.17839	11.9004	3.41514		4.32615	-0.328446	0.796394	1.00064	-0.328235	0.742734	NA		4.32615	0.592592	1.50795	0.94355	0.628045	0.529975	NA		4.32615	-0.09319	0.937448	0.980454	-0.0950478	0.924277	NA		4.32615	1.53723	2.90237	0.878967	1.74891	0.080307	NA
B0507.7	B0507.7	7.62622	3.69164	3.76792	1.1915	2.32683	6.74719	5.00254	15.1017	5.81639	2.0237	3.90166	5.91382	7.50959	7.65023	9.39164		5.16079	0.789501	1.72848	0.689828	1.14449	0.25242	NA		5.16079	-0.537879	0.688783	0.794283	-0.677188	0.498287	0.616881		5.16079	-0.343444	0.788158	0.756295	-0.454114	0.649747	NA		5.16079	0.704999	1.63014	0.685527	1.02841	0.303759	0.410078
B0507.8	B0507.8	16.2057	13.8437	11.3038	5.95752	13.961	10.1208	24.0122	25.4841	17.4492	8.0948	15.6067	16.7558	25.8664	18.7006	24.7598		17.1456	0.695773	1.61975	0.402587	1.72825	0.0839427	0.214573		17.1456	-0.457498	0.728248	0.460489	-0.993504	0.320464	0.444383		17.1456	-0.0279079	0.980842	0.427498	-0.0652819	0.94795	NA		17.1456	0.746266	1.67745	0.396594	1.88169	0.0598785	0.111006
B0507.9	B0507.9	7.62622	2.76873	0	1.1915	1.16341	3.3736	3.00152	7.55083	6.78578	5.05925	0	3.94255	5.0064	2.55008	5.12271		3.17986	0.744687	1.67561	0.947483	0.785964	0.431889	NA		3.17986	-0.846359	0.556187	1.09536	-0.77268	0.439712	NA		3.17986	-0.210134	0.864457	1.00571	-0.20894	0.834495	NA		3.17986	0.290412	1.22299	0.959297	0.302734	0.762092	NA
B0511.1	fkb-7	2798.82	2245.44	1797.3	1757.47	1716.04	1954.44	2857.45	4333.23	3403.55	2633.85	3813.88	3716.84	3670.52	3442.6	3019.84		2643.8	0.630968	1.5486	0.188642	3.34479	0.000823454	0.0098196		2643.8	-0.333856	0.793413	0.189314	-1.76351	0.0778153	0.144653		2643.8	0.571213	1.48577	0.188674	3.02751	0.00246579	0.0121757		2643.8	0.566692	1.48112	0.188597	3.00478	0.00265777	0.00794526
B0511.10	eif-3.E	2929.42	3193.27	2729.86	2915.61	2630.48	2598.79	3849.95	2406.83	3327.94	3895.62	3892.89	3131.37	2174.44	2312.07	2212.16		2873.82	0.114513	1.08261	0.151846	0.754136	0.450767	0.626854		2873.82	-0.120254	0.920026	0.152127	-0.790484	0.429245	0.553128		2873.82	0.302766	1.23351	0.151773	1.99486	0.0460584	0.107259		2873.82	-0.402239	0.756683	0.152017	-2.64601	0.00814469	0.0207034
B0511.11	B0511.11	82.9351	64.6038	49.9249	82.2138	75.622	69.721	79.0401	86.8345	70.766	64.7584	85.8366	76.8797	80.1023	69.7021	79.402		73.8671	0.262299	1.19939	0.213834	1.22665	0.219955	0.397743		73.8671	0.204344	1.15216	0.218633	0.934643	0.349972	0.474713		73.8671	0.205822	1.15334	0.215052	0.957082	0.338526	0.466215		73.8671	0.215889	1.16142	0.211823	1.01919	0.30811	0.41503
B0511.12	B0511.12	2157.27	3207.12	4839.89	6349.53	5927.6	5341.53	3663.86	1630.98	2907.22	2794.73	1664.06	2262.04	2307.11	2439.57	2196.79		3556.19	-0.315191	0.803745	0.273218	-1.15363	0.248654	0.429841		3556.19	0.787913	1.72658	0.273017	2.88595	0.00390238	0.012019		3556.19	-0.602507	0.658608	0.273328	-2.20434	0.0275007	0.073329		3556.19	-0.555451	0.680444	0.273231	-2.0329	0.0420626	0.0825041
B0511.13	mppe-1	587.219	498.372	463.454	387.239	346.698	375.594	638.324	693.733	666.946	676.928	643.775	691.917	441.397	396.962	362.859		480.917	0.368258	1.29079	0.120904	3.04587	0.00232006	0.0203205		480.917	-0.481313	0.716325	0.125627	-3.83129	0.000127476	0.000623907		480.917	0.377843	1.2994	0.120961	3.12369	0.00178601	0.00961192		480.917	-0.366476	0.775675	0.12277	-2.98506	0.0028352	0.00840034
B0511.15	B0511.15	0.953277	0.922911	0	5.95752	4.65366	3.3736	1.00051	0.943854	0	2.0237	0.975416	0.985637	0.834399	0.850026	2.56136		1.79358	0.0484084	1.03412	1.6421	0.0294795	0.976482	NA		1.79358	2.89389	7.43271	1.35237	2.13986	0.032366	NA		1.79358	1.08038	2.11459	1.47489	0.732512	0.463856	NA		1.79358	1.17381	2.25607	1.43931	0.815535	0.414766	NA
B0511.16	B0511.16	3.81311	5.53747	2.82594	9.53204	2.32683	4.49813	3.00152	0	4.84699	6.0711	2.92625	1.97127	3.3376	5.10015	1.70757		4.06955	-0.644492	0.639718	0.878952	-0.733251	0.463405	NA		4.06955	0.418704	1.33673	0.813352	0.514789	0.606701	NA		4.06955	-0.157418	0.896628	0.837919	-0.187868	0.85098	NA		4.06955	-0.264692	0.832376	0.828838	-0.319353	0.749458	NA
B0511.17	B0511.17	0.953277	1.84582	0.94198	0	0	2.24906	0	2.83156	0	1.01185	1.95083	0.985637	1.6688	0	1.70757		1.0121	-0.383358	0.766651	1.58382	-0.242047	0.808744	NA		1.0121	-0.709627	0.611478	1.69059	-0.419751	0.674667	NA		1.0121	0.0774515	1.05515	1.52533	0.0507769	0.959503	NA		1.0121	-0.149265	0.90171	1.52519	-0.0978662	0.922039	NA
B0511.18	B0511.18	14.2992	34.1477	64.9966	61.9583	33.739	43.8567	52.0264	20.7648	32.9595	35.4148	18.5329	24.6409	33.376	29.7509	22.1984		35.5851	-0.104291	0.930262	0.435724	-0.239352	0.810833	0.890383		35.5851	0.297489	1.229	0.433607	0.686079	0.492663	0.612156		35.5851	-0.531575	0.691799	0.443824	-1.19772	0.231027	0.354253		35.5851	-0.410985	0.75211	0.437425	-0.939557	0.347445	0.456793
B0511.19	B0511.19	2003.79	1342.84	848.724	794.734	627.081	676.968	1354.69	1986.81	1647.01	1447.96	1508.97	1803.72	810.202	711.471	680.467		1103.2	0.249949	1.18917	0.230896	1.08252	0.279023	0.463349		1103.2	-0.999276	0.500251	0.232504	-4.29789	1.72432e-05	0.000108315		1103.2	0.18243	1.13479	0.230957	0.789889	0.429593	0.555151		1103.2	-0.929802	0.52493	0.231749	-4.01211	6.01776e-05	0.000304706
B0511.2	B0511.2	155.384	136.591	126.225	115.576	119.832	119.2	153.078	196.322	182.247	188.204	178.501	204.027	100.128	98.603	93.0626		132.233	0.347674	1.27251	0.157884	2.20209	0.027659	0.106553		132.233	-0.23748	0.848226	0.167133	-1.42091	0.155344	0.252586		132.233	0.448878	1.36498	0.157297	2.8537	0.00432128	0.0185284		132.233	-0.518786	0.697959	0.164811	-3.14777	0.00164522	0.00526658
B0511.3	fbxa-125	0	0	0	0	0	0	0	0.943854	0	0	0.975416	0	0	0.850026	0		0.330115	1.00963	2.0134	3.34745	0.301613	0.762947	NA		0.330115	0	1	3.34745	0	1	NA		0.330115	1.03887	2.05462	3.34738	0.310353	0.756293	NA		0.330115	0.810904	1.75431	3.34745	0.242245	0.80859	NA
B0511.4	tag-344	0.953277	1.84582	0.94198	0	2.32683	2.24906	3.00152	2.83156	0.969398	1.01185	0.975416	2.95691	0.834399	2.55008	0		1.70778	0.858035	1.81257	1.21087	0.708609	0.478567	NA		1.70778	0.298671	1.23001	1.30077	0.22961	0.818395	NA		1.70778	0.400117	1.31961	1.2592	0.317754	0.750672	NA		1.70778	-0.148393	0.902255	1.29972	-0.114173	0.9091	NA
B0511.5	cutl-14	501.424	452.226	489.829	168.002	187.31	173.178	280.142	548.379	334.442	345.041	476.003	464.235	417.2	431.813	502.026		382.468	-0.310902	0.806138	0.203864	-1.52504	0.127249	0.280687		382.468	-1.4495	0.366149	0.210691	-6.87974	5.99607e-12	1.92304e-10		382.468	-0.167182	0.890581	0.203539	-0.821376	0.411432	0.537334		382.468	-0.0954845	0.935958	0.202798	-0.470836	0.637758	0.724543
B0511.6	B0511.6	5915.08	5803.27	4657.15	5310.54	5038.75	4723.03	7454.78	6477.67	6817.77	7961.24	8734.85	7211.91	4907.1	4834.95	4811.93		5831.21	0.341555	1.26712	0.112129	3.04608	0.00231849	0.0203205		5831.21	-0.119681	0.920391	0.112409	-1.06469	0.287015	0.408019		5831.21	0.545959	1.45999	0.11208	4.87117	1.10942e-06	5.84543e-05		5831.21	-0.170125	0.888766	0.112234	-1.5158	0.12957	0.209715
B0511.7	B0511.7	4883.64	3439.69	2241.91	1864.71	1738.14	1888.09	3994.03	5768.83	5167.86	4647.43	5284.8	5388.48	2430.6	2248.32	2072.14		3204.2	0.499011	1.41324	0.20831	2.39553	0.0165965	0.0774451		3204.2	-0.944175	0.519727	0.209038	-4.51675	6.27958e-06	4.46719e-05		3204.2	0.536187	1.45013	0.208308	2.57401	0.0100527	0.0347215		3204.2	-0.646108	0.639002	0.20861	-3.0972	0.00195358	0.00611546
B0511.8	mrps-30	836.977	934.909	936.328	1123.59	1106.41	1049.19	948.482	723.936	871.488	926.855	808.62	827.935	745.118	824.525	820.488		891.741	-0.0908085	0.938996	0.116335	-0.780576	0.435052	0.613793		891.741	0.275807	1.21067	0.116083	2.37595	0.0175039	0.0425775		891.741	-0.0795186	0.946373	0.116378	-0.683281	0.494429	0.613263		891.741	-0.180404	0.882456	0.116086	-1.55406	0.120169	0.197223
B0511.9	cdc-26	2739.72	2456.79	1748.31	3300.47	2848.04	3152.06	3249.65	2727.74	3023.55	3736.76	4226.48	2970.71	1510.26	1655.85	1442.9		2654.68	0.374107	1.29604	0.164805	2.27	0.0232078	0.0956212		2654.68	0.421382	1.33921	0.164911	2.55521	0.0106125	0.0279589		2654.68	0.654821	1.57442	0.164696	3.97594	7.01018e-05	0.000927744		2654.68	-0.591472	0.663665	0.165282	-3.57856	0.000345494	0.00137889
B0513.1	lin-66	5146.74	7889.04	15446.6	26938.7	25967.4	23118.1	8449.29	3732.94	6606.44	6714.64	3468.58	5393.41	5784.06	6543.5	5505.21		12066.2	-0.600229	0.659649	0.320245	-1.87428	0.0608915	0.175888		12066.2	1.41639	2.66916	0.320126	4.42447	9.66802e-06	6.53644e-05		12066.2	-0.870702	0.546881	0.320283	-2.71854	0.00655714	0.0252458		12066.2	-0.675541	0.626098	0.320231	-2.10954	0.0348978	0.0705536
B0513.12	B0513.12	129.646	109.826	81.9522	34.5536	39.5561	41.6077	111.056	212.367	143.471	108.268	114.124	148.831	112.644	85.0026	93.0626		91.7606	0.540112	1.45409	0.247721	2.18032	0.0292335	0.110408		91.7606	-1.47257	0.36034	0.27907	-5.27671	1.31527e-07	1.48937e-06		91.7606	0.208207	1.15525	0.250191	0.832193	0.4053	0.531881		91.7606	-0.144423	0.904741	0.25119	-0.574956	0.565321	0.662666
B0513.13	21ur-1446	0	0	0	1.1915	0	0	0	0	0	0	0	0	0	0	0		0.0661947	0	1	5.2679	0	1	NA		0.0661947	1.2656	2.40428	5.2679	0.240248	0.810138	NA		0.0661947	0	1	5.26765	0	1	NA		0.0661947	0	1	5.2679	0	1	NA
B0513.17	21ur-4615	0.953277	0	0.94198	0	0	0	0	0	0	0	0	0	0	0	0		0.164483	-1.82162	0.282903	5.23408	-0.348031	0.727817	NA		0.164483	-1.56564	0.337827	5.23408	-0.299125	0.764845	NA		0.164483	-1.79232	0.288707	5.23382	-0.34245	0.732013	NA		0.164483	-2.02035	0.246498	5.23408	-0.385999	0.699497	NA
B0513.2	thoc-7	4546.18	2803.8	1865.12	1708.62	1618.31	1809.37	3370.71	4980.72	4339.99	3993.77	4454.73	4794.14	2136.9	1858.16	1744.28		2764.06	0.461842	1.3773	0.232016	1.99056	0.0465297	0.148432		2764.06	-0.843226	0.557396	0.232685	-3.62389	0.000290202	0.0012786		2764.06	0.523154	1.43709	0.232009	2.25489	0.0241404	0.0666157		2764.06	-0.683074	0.622837	0.232334	-2.94005	0.00328161	0.00949784
B0513.20	21ur-1259	0	0.922911	0.94198	0	0	0	0	0	0.969398	0	0	0	0	0	0.853785		0.439043	-0.840529	0.558439	2.76153	-0.304371	0.760845	NA		0.439043	-1.54634	0.342377	2.76153	-0.559959	0.575508	NA		0.439043	-1.77306	0.292588	2.76149	-0.642066	0.52083	NA		0.439043	-1.03926	0.486577	2.76153	-0.376335	0.706668	NA
B0513.21	21ur-406	0	0	0	1.1915	0	0	0	0	0	0	0	0	0	0	0		0.125385	0	1	5.2679	0	1	NA		0.125385	1.2656	2.40428	5.2679	0.240248	0.810138	NA		0.125385	0	1	5.26765	0	1	NA		0.125385	0	1	5.2679	0	1	NA
B0513.24	21ur-5027	0.953277	0.922911	0	0	0	0	0	0	0	0	0	0	0	0	0		0.104233	-1.80813	0.285561	5.23501	-0.345392	0.7298	NA		0.104233	-1.55215	0.341002	5.23501	-0.296494	0.766853	NA		0.104233	-1.77884	0.291417	5.23475	-0.339814	0.733997	NA		0.104233	-2.00686	0.248815	5.23501	-0.383353	0.701458	NA
B0513.26	21ur-3387	1.90655	0	0.94198	1.1915	0	1.12453	1.00051	0	1.9388	1.01185	0.975416	1.97127	0	0.850026	0.853785		0.881171	0.0465941	1.03282	1.58711	0.0293579	0.976579	NA		0.881171	-0.28914	0.818389	1.69388	-0.170697	0.864462	NA		0.881171	0.484114	1.39873	1.53251	0.315896	0.752081	NA		0.881171	-0.739341	0.599013	1.69294	-0.436721	0.662314	NA
B0513.3	rpl-29	16393.5	13560.3	7449.17	2841.74	3090.03	3023.87	8843.49	19371.7	14064	12531.8	13828.5	17488.2	18611.3	16735.3	23188		10941.8	0.176808	1.13038	0.263811	0.670207	0.502726	0.671299		10941.8	-2.06228	0.239437	0.264231	-7.80483	5.95813e-15	3.43309e-13		10941.8	0.229373	1.17233	0.26381	0.869462	0.384594	0.512452		10941.8	0.646134	1.56497	0.263778	2.44954	0.0143038	0.0332927
B0513.31	21ur-5378	0	0.922911	0	0	0	0	0	0	0	0	0	0	0	0	0		0.110463	-0.913941	0.530733	5.2679	-0.173492	0.862264	NA		0.110463	-0.657962	0.633773	5.2679	-0.1249	0.900603	NA		0.110463	-0.884652	0.541618	5.26765	-0.167941	0.86663	NA		0.110463	-1.11267	0.462437	5.2679	-0.211217	0.832718	NA
B0513.35	21ur-3203	0	0	0.94198	0	0	0	0	0	0	0	0	0	0	1.70005	0		0.146779	-0.913941	0.530733	5.2679	-0.173492	0.862264	NA		0.146779	-0.657962	0.633773	5.2679	-0.1249	0.900603	NA		0.146779	-0.88464	0.541623	5.26765	-0.167938	0.866632	NA		0.146779	0.751321	1.68333	5.23445	0.143534	0.885869	NA
B0513.37	21ur-4889	0	0	0	0	0	0	0	0	0	1.01185	0	0	0	0.850026	0		0.160628	0	1	5.2679	0	1	NA		0.160628	0	1	5.2679	0	1	NA		0.160628	1.03883	2.05457	5.26765	0.19721	0.843663	NA		0.160628	0.810897	1.7543	5.2679	0.153932	0.877664	NA
B0513.38	21ur-2137	0	0	0	0	0	0	0	0	0	0	0	0.985637	0	0	0		0.0547576	0	1	5.2679	0	1	NA		0.0547576	0	1	5.2679	0	1	NA		0.0547576	1.03881	2.05453	5.26765	0.197205	0.843667	NA		0.0547576	0	1	5.2679	0	1	NA
B0513.4	B0513.4	20.9721	16.6124	6.59386	9.53204	9.30732	7.87172	19.0097	29.2595	12.6022	12.1422	14.6312	23.6553	29.204	22.1007	29.0287		15.6854	0.465248	1.38055	0.446257	1.04256	0.297154	0.481871		15.6854	-0.727024	0.604149	0.5064	-1.43567	0.151096	0.247287		15.6854	0.192551	1.14278	0.454818	0.423358	0.672034	NA		15.6854	0.863321	1.81922	0.433489	1.99156	0.0464192	0.0894799
B0513.41	21ur-4195	0	0	0	1.1915	0	0	0	0	0	0	0	0	0	0	0		0.0661947	0	1	5.2679	0	1	NA		0.0661947	1.2656	2.40428	5.2679	0.240248	0.810138	NA		0.0661947	0	1	5.26765	0	1	NA		0.0661947	0	1	5.2679	0	1	NA
B0513.42	21ur-2095	0	0	0.94198	0	0	0	0	0	0	0	0	0	0	0	0		0.0523322	-0.913941	0.530733	5.2679	-0.173492	0.862264	NA		0.0523322	-0.657962	0.633773	5.2679	-0.1249	0.900603	NA		0.0523322	-0.884666	0.541613	5.26765	-0.167943	0.866628	NA		0.0523322	-1.11267	0.462437	5.2679	-0.211217	0.832718	NA
B0513.44	21ur-6720	0	0.922911	0.94198	1.1915	0	0	0	0	0	0	0	0	0.834399	0	0		0.275346	-1.80121	0.286934	3.44453	-0.52292	0.60103	NA		0.275346	-0.58344	0.667371	3.44453	-0.169382	0.865496	NA		0.275346	-1.77194	0.292815	3.44445	-0.514433	0.60695	NA		0.275346	-1.03815	0.486951	3.44453	-0.301391	0.763116	NA
B0513.46	21ur-8352	0	0	0	0	0	0	0	0	0	0	0	0	0	0	0		0.0591905	0	1	5.2679	0	1	NA		0.0591905	0	1	5.2679	0	1	NA		0.0591905	0	1	5.26765	0	1	NA		0.0591905	0	1	5.2679	0	1	NA
B0513.5	prdh-1	81.0285	106.135	200.642	61.9583	82.6024	67.4719	71.0361	74.5644	52.3475	58.6873	78.0333	96.5925	95.1215	111.353	109.285		89.6492	-0.97015	0.510453	0.28934	-3.35298	0.000799475	0.00963924		89.6492	-0.870925	0.546796	0.291358	-2.98919	0.00279717	0.00903665		89.6492	-0.732475	0.601871	0.286955	-2.55257	0.010693	0.0363418		89.6492	-0.296689	0.814119	0.28122	-1.05501	0.291423	0.39756
B0513.50	21ur-11336	5.71966	10.152	18.8396	5.95752	5.81707	6.74719	4.00203	2.83156	6.78578	5.05925	5.8525	5.91382	8.34399	6.8002	7.68407		6.84553	-1.3524	0.391639	0.608102	-2.22397	0.0261501	NA		6.84553	-0.905693	0.533776	0.592782	-1.52787	0.126545	0.214116		6.84553	-1.04457	0.484789	0.586261	-1.78175	0.07479	NA		6.84553	-0.604867	0.657532	0.54619	-1.10743	0.268108	0.372653
B0513.51	21ur-12638	0	0	0	1.1915	0	1.12453	0	0.943854	0	0	0	0.985637	0	0	0		0.293747	1.00963	2.0134	3.43055	0.294307	0.768523	NA		0.293747	2.15992	4.4689	3.37981	0.639065	0.522781	NA		0.293747	1.03886	2.05461	3.43048	0.302834	0.762017	NA		0.293747	0	1	3.43055	0	1	NA
B0513.55	21ur-14046	0	0.922911	0.94198	1.1915	0	0	0	0	0	0	0	0	0.834399	0	0		0.275346	-1.80121	0.286934	3.44453	-0.52292	0.60103	NA		0.275346	-0.58344	0.667371	3.44453	-0.169382	0.865496	NA		0.275346	-1.77194	0.292815	3.44445	-0.514433	0.60695	NA		0.275346	-1.03815	0.486951	3.44453	-0.301391	0.763116	NA
B0513.57	21ur-13988	0	0	0	0	0	0	0	0	0	0	0	0	0	0	0		0.0591905	0	1	5.2679	0	1	NA		0.0591905	0	1	5.2679	0	1	NA		0.0591905	0	1	5.26765	0	1	NA		0.0591905	0	1	5.2679	0	1	NA
B0513.58	21ur-10602	3.81311	3.69164	10.3618	3.57451	4.65366	2.24906	4.00203	2.83156	2.90819	4.0474	4.87708	4.92819	5.0064	5.95018	9.39164		5.23438	-0.877608	0.544269	0.72084	-1.21748	0.223422	NA		5.23438	-0.77339	0.585041	0.736664	-1.04986	0.293785	0.41573		5.23438	-0.365129	0.776399	0.678554	-0.538099	0.590509	NA		5.23438	0.18706	1.13844	0.631113	0.296397	0.766927	0.831339
B0513.59	21ur-8107	0	0	0	0	0	0	0	0	0	0	0	0.985637	0	0	0		0.0547576	0	1	5.2679	0	1	NA		0.0547576	0	1	5.2679	0	1	NA		0.0547576	1.03881	2.05453	5.26765	0.197205	0.843667	NA		0.0547576	0	1	5.2679	0	1	NA
B0513.6	B0513.6	2.85983	1.84582	6.59386	5.95752	1.16341	2.24906	4.00203	1.88771	4.84699	3.03555	4.87708	5.91382	1.6688	0.850026	4.26893		3.30105	-0.0757778	0.94883	0.88684	-0.0854469	0.931906	NA		3.30105	-0.276761	0.825442	0.925634	-0.298996	0.764943	NA		3.30105	0.294699	1.22663	0.864137	0.341033	0.733079	NA		3.30105	-0.735949	0.600423	0.926072	-0.794699	0.426788	NA
B0513.62	21ur-15565	0	0.922911	0	0	0	0	0	0	0	0	0	0	0	0	0		0.110463	-0.913941	0.530733	5.2679	-0.173492	0.862264	NA		0.110463	-0.657962	0.633773	5.2679	-0.1249	0.900603	NA		0.110463	-0.884652	0.541618	5.26765	-0.167941	0.86663	NA		0.110463	-1.11267	0.462437	5.2679	-0.211217	0.832718	NA
B0513.7	B0513.7	19.0655	23.9957	17.8976	14.2981	22.1049	7.87172	24.0122	29.2595	24.2349	30.3555	28.2871	23.6553	20.0256	23.8007	16.2219		20.1581	0.346652	1.27161	0.354856	0.976881	0.328628	0.513145		20.1581	-0.4669	0.723518	0.393121	-1.18768	0.234961	0.349206		20.1581	0.431477	1.34861	0.353465	1.22071	0.222197	NA		20.1581	-0.0225614	0.984483	0.35943	-0.0627701	0.94995	0.965571
B0513.74	21ur-10500	0	0	0	0	0	0	0	0.943854	0	0	0	0	0.834399	0	0		0.155982	1.00963	2.01339	5.2679	0.191656	0.848012	NA		0.155982	0	1	5.2679	0	1	NA		0.155982	0	1	5.26765	0	1	NA		0.155982	0.810897	1.7543	5.2679	0.153932	0.877664	NA
B0513.76	21ur-14580	96.281	184.582	338.171	562.39	480.49	453.186	187.095	75.5083	146.379	129.517	76.0825	117.291	119.319	123.254	120.384		242.209	-0.59905	0.660188	0.340445	-1.75961	0.0784741	0.20563		242.209	1.27288	2.41644	0.335515	3.79382	0.000148348	0.000715054		242.209	-0.939517	0.521407	0.342559	-2.74264	0.00609466	0.0239044		242.209	-0.770344	0.586277	0.340307	-2.26368	0.0235941	0.0507403
B0513.77	21ur-10065	92.4679	180.891	330.635	551.667	471.183	435.194	183.093	71.7329	140.563	122.434	75.107	116.305	115.981	120.704	114.407		235.958	-0.612382	0.654116	0.343953	-1.78042	0.0750068	0.20058		235.958	1.27122	2.41365	0.338885	3.75117	0.000176015	0.000829929		235.958	-0.944975	0.519439	0.346065	-2.73063	0.0063214	0.0245323		235.958	-0.782803	0.581236	0.343807	-2.27687	0.0227942	0.0493008
B0513.82	21ur-9656	0	0	1.88396	0	0	0	0	0	0	0	0	0	0	0	0		0.221045	-1.81362	0.284476	4.93513	-0.367492	0.713252	NA		0.221045	-1.55764	0.339705	4.93513	-0.315624	0.752288	NA		0.221045	-1.78432	0.290313	4.93492	-0.36157	0.717673	NA		0.221045	-2.01235	0.247869	4.93513	-0.407761	0.683449	NA
B0513.83	21ur-15594	3.81311	1.84582	1.88396	0	2.32683	1.12453	2.00102	2.83156	0	0	1.95083	1.97127	3.3376	0	2.56136		1.8898	-0.636544	0.643252	1.16269	-0.547476	0.584052	NA		1.8898	-1.11811	0.460697	1.2768	-0.875712	0.381187	NA		1.8898	-0.93193	0.524157	1.20711	-0.772034	0.440094	NA		1.8898	-0.349618	0.784792	1.11023	-0.314907	0.752832	NA
B0513.9	vamp-8	19.0655	14.7666	14.1297	2.38301	2.32683	3.3736	7.00356	16.0455	6.78578	10.1185	9.75416	21.684	25.8664	23.8007	30.7363		12.8191	-0.677684	0.625168	0.480587	-1.41012	0.158506	0.321227		12.8191	-2.56358	0.169156	0.679037	-3.77531	0.000159807	0.000761322		12.8191	-0.205206	0.867415	0.461657	-0.444498	0.656682	NA		12.8191	0.745947	1.67707	0.43062	1.73226	0.0832268	0.145559
B0513.90	B0513.90	0	0	0	0	0	0	0	0	0	0	0	0	0	0.850026	0		0.0472236	0	1	5.2679	0	1	NA		0.0472236	0	1	5.2679	0	1	NA		0.0472236	0	1	5.26765	0	1	NA		0.0472236	0.810897	1.7543	5.2679	0.153932	0.877664	NA
B0513.t1	B0513.t1	0	0	0	0	0	1.12453	0	0	0	0	0	0	0	0.850026	0		0.109698	0	1	5.2679	0	1	NA		0.109698	1.2656	2.40428	5.2679	0.240248	0.810138	NA		0.109698	0	1	5.26765	0	1	NA		0.109698	0.810897	1.7543	5.2679	0.153932	0.877664	NA
B0523.1	kin-31	5.71966	10.152	5.65188	3.57451	3.49024	5.62266	9.00457	2.83156	3.87759	10.1185	6.82791	4.92819	4.172	1.70005	2.56136		5.15644	-0.465458	0.724241	0.660996	-0.704177	0.481322	NA		5.15644	-0.760347	0.590354	0.705044	-1.07844	0.280838	0.401166		5.15644	0.0185227	1.01292	0.633976	0.0292167	0.976692	NA		5.15644	-1.35115	0.39198	0.71823	-1.88122	0.0599419	0.111099
B0523.3	pgl-2	515.723	443.92	324.983	280.004	222.212	240.65	414.21	488.916	474.035	424.977	439.913	415.939	173.555	247.357	192.102		328.686	0.100658	1.07226	0.173894	0.578848	0.562692	0.717669		328.686	-0.790472	0.578155	0.178946	-4.41737	9.99079e-06	6.72036e-05		328.686	-0.00416654	0.997116	0.174304	-0.0239039	0.980929	0.987669		328.686	-1.06748	0.47715	0.17789	-6.00083	1.96314e-09	3.77482e-08
B0523.5	fli-1	1466.14	2026.71	2696.89	3750.86	3807.86	3340.98	2536.29	1218.52	1991.14	1917.46	1172.45	1710.08	1630.42	1640.55	1393.38		2337.5	-0.107464	0.928219	0.244412	-0.439682	0.660167	0.79021		2337.5	0.816309	1.7609	0.244145	3.34354	0.000827158	0.00316848		2337.5	-0.36692	0.775436	0.244571	-1.50026	0.133547	0.235934		2337.5	-0.408213	0.753556	0.244464	-1.66983	0.0949539	0.162393
B0523.6	B0523.6	0	0	0	0	0	0	1.00051	0	0	0	0	0	0	0	0		0.0555838	1.00963	2.01339	5.2679	0.191656	0.848012	NA		0.0555838	0	1	5.2679	0	1	NA		0.0555838	0	1	5.26765	0	1	NA		0.0555838	0	1	5.2679	0	1	NA
B0523.t1	sup-5	0	0	0	0	0	0	1.00051	0	0	0	0	0	0	0	0		0.0555838	1.00963	2.01339	5.2679	0.191656	0.848012	NA		0.0555838	0	1	5.2679	0	1	NA		0.0555838	0	1	5.26765	0	1	NA		0.0555838	0	1	5.2679	0	1	NA
B0524.10	B0524.10	0	0	0	0	0	0	0	0	0	0	0	0	0	0	0		0.0571906	0	1	5.2679	0	1	NA		0.0571906	0	1	5.2679	0	1	NA		0.0571906	0	1	5.26765	0	1	NA		0.0571906	0	1	5.2679	0	1	NA
B0524.2	B0524.2	0	0	0.94198	1.1915	0	0	0	0	0	0	0	0	0	0	0		0.177717	-0.913941	0.530733	5.2679	-0.173492	0.862264	NA		0.177717	0.303821	1.23441	5.2679	0.057674	0.954008	NA		0.177717	-0.884639	0.541623	5.26765	-0.167938	0.866632	NA		0.177717	-1.11267	0.462437	5.2679	-0.211217	0.832718	NA
B0524.3	B0524.3	0	0	0	0	0	0	0	0	0.969398	0	0	0	0	0.850026	0		0.331841	1.00963	2.0134	3.79121	0.266308	0.790002	NA		0.331841	0	1	3.79121	0	1	NA		0.331841	0	1	3.79112	0	1	NA		0.331841	0.810902	1.75431	3.79121	0.21389	0.830633	NA
B0524.4	B0524.4	0	0.922911	1.88396	0	2.32683	2.24906	2.00102	0	0	0	0	0	0	0.850026	0		0.972961	-0.514446	0.700062	1.85483	-0.277354	0.781508	NA		0.972961	0.709864	1.63565	1.71421	0.414106	0.678797	NA		0.972961	-2.36243	0.194464	1.94968	-1.2117	0.225626	NA		0.972961	-1.62862	0.323397	1.94969	-0.835324	0.403536	NA
B0524.5	B0524.5	1.90655	0	0.94198	0	1.16341	0	2.00102	2.83156	0.969398	1.01185	0.975416	2.95691	0.834399	1.70005	0		1.01858	1.03702	2.05198	1.47078	0.705083	0.480759	NA		1.01858	-1.18403	0.44012	1.78967	-0.661592	0.508233	NA		1.01858	0.805341	1.74756	1.49402	0.539042	0.589858	NA		1.01858	-0.158805	0.895767	1.58417	-0.100245	0.92015	NA
B0524.6	B0524.6	650.135	823.237	843.072	1557.3	1463.58	1392.17	723.367	428.51	678.578	726.508	394.068	505.632	453.913	501.515	416.647		860.431	-0.340095	0.78999	0.211211	-1.61021	0.107352	0.251274		860.431	0.929764	1.90496	0.209887	4.42983	9.43088e-06	6.38924e-05		860.431	-0.510778	0.701844	0.211599	-2.41389	0.0157832	0.0488639		860.431	-0.755604	0.592298	0.211634	-3.57033	0.000356534	0.00141727
B0524.7	B0524.7	0	0	0	0	0	0	0	0	0	0	0	0.985637	0	0	0		0.0547576	0	1	5.2679	0	1	NA		0.0547576	0	1	5.2679	0	1	NA		0.0547576	1.03881	2.05453	5.26765	0.197205	0.843667	NA		0.0547576	0	1	5.2679	0	1	NA
B0524.8	B0524.8	0	0	0	0	0	0	0	0	0	0	0	0.985637	0	0	0		0.0547576	0	1	5.2679	0	1	NA		0.0547576	0	1	5.2679	0	1	NA		0.0547576	1.03881	2.05453	5.26765	0.197205	0.843667	NA		0.0547576	0	1	5.2679	0	1	NA
B0545.1	tpa-1	1444.21	1660.32	2701.6	3707.96	3904.42	3619.87	1523.77	1077.88	1424.05	1354.87	936.399	1290.2	2150.25	2391.12	2309.49		2388.29	-0.528448	0.6933	0.204807	-2.58022	0.00987366	0.0554438		2388.29	0.951993	1.93454	0.204104	4.66424	3.09755e-06	2.4075e-05		2388.29	-0.697104	0.616809	0.204987	-3.40072	0.000672078	0.00464609		2388.29	0.2387	1.17993	0.204208	1.16891	0.242441	0.344537
B0545.3	scl-23	1.90655	0	2.82594	2.38301	2.32683	2.24906	3.00152	0	0	1.01185	0	2.95691	0	3.4001	5.12271		2.14473	-0.677345	0.625315	1.43776	-0.471112	0.637561	NA		2.14473	0.561019	1.47531	1.31482	0.426689	0.669606	NA		2.14473	-0.249872	0.840971	1.37908	-0.181188	0.85622	NA		2.14473	0.850641	1.8033	1.26052	0.674831	0.499783	NA
B0545.4	B0545.4	9.53277	9.22911	26.3754	19.0641	23.2683	33.736	6.00305	7.55083	11.6328	7.08295	3.90166	6.89946	12.516	11.9004	10.2454		13.1911	-0.839482	0.558844	0.523655	-1.60312	0.108908	0.253088		13.1911	0.756027	1.68883	0.475119	1.59124	0.111556	0.193929		13.1911	-1.33751	0.395702	0.556394	-2.4039	0.0162213	NA		13.1911	-0.379963	0.768457	0.494825	-0.767874	0.442562	0.549662
B0546.1	mai-2	12609	9589.97	5005.68	4382.36	4245.3	4068.56	7793.96	17180	13056.8	10944.2	10819.3	12202.2	10750.4	8929.52	10047.3		8479.33	0.483334	1.39797	0.267048	1.80991	0.0703093	0.192338		8479.33	-1.09946	0.466692	0.267305	-4.11312	3.90344e-05	0.000221538		8479.33	0.320228	1.24853	0.267063	1.19907	0.230499	0.353735		8479.33	0.127938	1.09273	0.26706	0.479062	0.631894	0.719714
B0546.2	otub-4	2573.85	2757.66	2785.43	3966.52	3541.43	3668.22	3097.57	2063.26	2526.25	3267.26	3270.57	2657.28	1864.05	1765.5	1684.52		2884.01	-0.078668	0.946931	0.137815	-0.570825	0.568118	0.72133		2884.01	0.461384	1.37686	0.137644	3.35201	0.000802268	0.00309088		2884.01	0.179907	1.13281	0.137674	1.30676	0.191294	0.308015		2884.01	-0.611111	0.654692	0.138062	-4.42634	9.58464e-06	6.27338e-05
B0546.3	B0546.3	238.319	272.259	420.123	668.434	579.381	571.262	260.132	154.792	222.961	250.939	158.017	212.898	352.951	368.911	320.169		360.491	-0.545876	0.684975	0.225121	-2.42481	0.0153164	0.0739613		360.491	0.966688	1.95435	0.220988	4.37438	1.21777e-05	8.00759e-05		360.491	-0.582246	0.667923	0.225447	-2.58262	0.00980524	0.0340542		360.491	0.163019	1.11963	0.221808	0.734955	0.462367	0.568157
B0546.4	B0546.4	1815.04	1270.85	1169.94	1601.38	1576.43	1555.23	1537.78	1899.98	1732.31	1603.78	1657.23	1865.81	1820.66	1570.85	1598.29		1597.84	0.280953	1.215	0.150906	1.86177	0.0626353	0.179126		1597.84	0.153415	1.1122	0.1513	1.01398	0.310594	0.433347		1597.84	0.268755	1.20477	0.150944	1.7805	0.0749946	0.154514		1597.84	0.229675	1.17257	0.15078	1.52325	0.127697	0.207058
B0546.5	B0546.5	2.85983	1.84582	0.94198	0	1.16341	1.12453	1.00051	0.943854	0.969398	0	0	0	2.5032	0	0.853785		0.78924	-0.95419	0.516131	1.63086	-0.585083	0.558492	NA		0.78924	-1.29184	0.408429	1.73575	-0.744257	0.456721	NA		0.78924	-3.36766	0.0968801	1.83124	-1.839	0.0659147	NA		0.78924	-0.745012	0.596663	1.57761	-0.472242	0.636754	NA
B0547.1	csn-5	2490.91	2069.17	1452.53	2114.92	1984.79	2102.87	2793.42	2786.26	2877.17	3068.94	4114.3	3031.82	1453.52	1428.04	1326.78		2222.47	0.492153	1.40654	0.166377	2.95806	0.00309579	0.0248902		2222.47	0.0449026	1.03161	0.166827	0.269156	0.78781	0.854193		2222.47	0.764694	1.69901	0.166265	4.59924	4.24035e-06	0.000144439		2222.47	-0.514699	0.699939	0.166915	-3.0836	0.00204514	0.00635759
B0547.14	21ur-10031	0	0	0	0	0	0	0	0	0	0	0	0	0	0	0		0.0591905	0	1	5.2679	0	1	NA		0.0591905	0	1	5.2679	0	1	NA		0.0591905	0	1	5.26765	0	1	NA		0.0591905	0	1	5.2679	0	1	NA
B0547.15	21ur-12173	0	0	0.94198	0	0	0	0	0	0	1.01185	0	0.985637	0.834399	0.850026	0		0.256883	-0.913948	0.530731	3.57183	-0.255877	0.798046	NA		0.256883	-0.657967	0.633771	3.57183	-0.18421	0.853849	NA		0.256883	0.982427	1.97579	3.52191	0.278947	0.780285	NA		0.256883	0.739638	1.66976	3.52349	0.209916	0.833733	NA
B0547.16	21ur-15615	0	0	0	0	0	0	0	0	0	2.0237	0	0	0	0	0.853785		0.27563	0	1	4.67003	0	1	NA		0.27563	0	1	4.67003	0	1	NA		0.27563	1.96203	3.8961	4.63048	0.42372	0.67177	NA		0.27563	0.810899	1.7543	4.67003	0.173639	0.862149	NA
B0547.2	B0547.2	0	0	0	0	0	0	0	0	0	0	0	0	0	0	0		0.0578846	0	1	5.2679	0	1	NA		0.0578846	0	1	5.2679	0	1	NA		0.0578846	0	1	5.26765	0	1	NA		0.0578846	0	1	5.2679	0	1	NA
B0547.27	21ur-13207	0	0	0.94198	0	0	0	0	0	0	0	0	0	0.834399	0	0		0.0986877	-0.913941	0.530733	5.2679	-0.173492	0.862264	NA		0.0986877	-0.657962	0.633773	5.2679	-0.1249	0.900603	NA		0.0986877	-0.884652	0.541618	5.26765	-0.167941	0.86663	NA		0.0986877	-0.150887	0.900697	5.2679	-0.0286426	0.97715	NA
B0547.3	srd-14	4.76638	6.46038	8.47782	7.14903	5.81707	4.49813	0	2.83156	1.9388	2.0237	2.92625	0.985637	39.2168	34.851	40.1279		9.75747	-2.02537	0.245642	0.796685	-2.54225	0.0110142	NA		9.75747	-0.179456	0.883036	0.596757	-0.300719	0.763629	0.836351		9.75747	-1.73013	0.301426	0.751333	-2.30274	0.0212934	NA		9.75747	2.53406	5.79198	0.48264	5.25041	1.51762e-07	1.68274e-06
B0547.34	B0547.34	0	0	0	0	1.16341	0	0	0	0	0	0	0	0	0	0		0.0646342	0	1	5.2679	0	1	NA		0.0646342	1.2656	2.40428	5.2679	0.240248	0.810138	NA		0.0646342	0	1	5.26765	0	1	NA		0.0646342	0	1	5.2679	0	1	NA
B0547.4	srd-8	2.85983	0.922911	1.88396	4.76602	0	5.62266	2.00102	9.43854	6.78578	4.0474	5.8525	4.92819	13.3504	5.95018	12.8068		5.31945	1.69801	3.24452	0.877353	1.93537	0.0529443	NA		5.31945	0.883464	1.8448	0.943994	0.935879	0.349336	0.47413		5.31945	1.39476	2.62946	0.893498	1.56102	0.11852	NA		5.31945	2.50829	5.68946	0.845121	2.96797	0.00299777	0.00879464
B0547.5	srd-6	0	0	0	0	0	0	0	0.943854	0	0	0.975416	0	0	0	0		0.106626	1.00963	2.01339	5.2679	0.191656	0.848012	NA		0.106626	0	1	5.2679	0	1	NA		0.106626	1.03882	2.05455	5.26765	0.197208	0.843665	NA		0.106626	0	1	5.2679	0	1	NA
B0554.1	B0554.1	0	0	0	0	0	1.12453	0	0.943854	2.90819	2.0237	0	0	5.0064	0.850026	5.12271		1.52565	2.89903	7.45926	1.78041	1.62829	0.103463	NA		1.52565	1.26562	2.4043	2.00866	0.630081	0.528642	NA		1.52565	1.94617	3.8535	1.91823	1.01457	0.310312	NA		1.52565	4.40524	21.189	1.67555	2.62913	0.00856047	NA
B0554.2	B0554.2	3.81311	0	0	2.38301	1.16341	3.3736	2.00102	0	0	0	1.95083	1.97127	0.834399	0	0		1.02959	-0.944915	0.51946	1.89047	-0.499832	0.617193	NA		1.02959	0.868811	1.82616	1.70201	0.510462	0.609728	NA		1.02959	0.0529703	1.0374	1.75283	0.0302199	0.975892	NA		1.02959	-2.06094	0.239661	1.98395	-1.03881	0.298895	NA
B0554.4	B0554.4	6.67294	0.922911	7.53584	4.76602	2.32683	2.24906	5.00254	1.88771	5.81639	1.01185	0.975416	7.8851	5.84079	4.25013	7.68407		4.35509	-0.252487	0.839448	0.825637	-0.305808	0.759751	NA		4.35509	-0.697909	0.616465	0.88405	-0.789445	0.429852	NA		4.35509	-0.609491	0.655428	0.854776	-0.713041	0.47582	NA		4.35509	0.235954	1.17769	0.788175	0.299368	0.764659	NA
B0554.5	B0554.5	0	0	0	1.1915	1.16341	2.24906	0	0.943854	0	0	0.975416	0	0	0	4.26893		0.658756	1.00964	2.0134	2.539	0.397651	0.690888	NA		0.658756	3.15319	8.89619	2.36272	1.33456	0.18202	NA		0.658756	1.03888	2.05463	2.53898	0.409173	0.682413	NA		0.658756	3.03951	8.22213	2.33927	1.29934	0.193826	NA
B0554.6	dod-20	7.62622	1.84582	4.7099	2.38301	5.81707	3.3736	4.00203	9.43854	3.87759	3.03555	1.95083	4.92819	2.5032	8.50026	1.70757		3.82354	0.296808	1.22842	0.80964	0.366593	0.713923	NA		3.82354	-0.288134	0.818961	0.864602	-0.333256	0.738941	NA		3.82354	-0.51307	0.70073	0.86445	-0.593522	0.552832	NA		3.82354	-0.155062	0.898094	0.823298	-0.188343	0.850608	NA
B0554.7	B0554.7	3.81311	3.69164	6.59386	17.8726	6.98049	6.74719	13.0066	4.71927	7.75518	5.05925	7.80333	1.97127	10.8472	4.25013	9.39164		8.57884	0.848283	1.80036	0.643642	1.31794	0.187523	NA		8.57884	1.15888	2.23284	0.64134	1.80697	0.0707669	0.133819		8.57884	0.0754764	1.05371	0.688111	0.109686	0.912658	NA		8.57884	0.798288	1.73904	0.637551	1.25212	0.210527	0.308814
B0563.1	B0563.1	244.039	160.587	115.863	135.832	114.015	127.072	211.107	231.244	223.931	239.808	253.608	273.022	109.306	98.603	87.9399		159.195	0.356954	1.28072	0.211014	1.69161	0.0907197	0.225862		159.195	-0.465296	0.724322	0.218856	-2.12604	0.0335001	0.0725765		159.195	0.558905	1.47315	0.2102	2.65891	0.00783933	0.0289208		159.195	-0.814209	0.56872	0.217817	-3.73804	0.000185464	0.000807096
B0563.10	B0563.10	0	0	0	0	0	1.12453	0	0.943854	0	0	0.975416	0	2.5032	0.850026	1.70757		0.450255	1.00964	2.0134	2.7399	0.368494	0.712505	NA		0.450255	1.26562	2.4043	2.7399	0.461922	0.644138	NA		0.450255	1.03887	2.05462	2.73986	0.37917	0.704562	NA		0.450255	3.28797	9.76735	2.54309	1.2929	0.196044	NA
B0563.11	21ur-10570	0	0	0	0	0	0	0	0	0	0	0	0	0	0	0		0.0591905	0	1	5.2679	0	1	NA		0.0591905	0	1	5.2679	0	1	NA		0.0591905	0	1	5.26765	0	1	NA		0.0591905	0	1	5.2679	0	1	NA
B0563.14	B0563.14	0	0	0	0	0	0	0	0	0	0	0	0	0	0	0		0.0578846	0	1	5.2679	0	1	NA		0.0578846	0	1	5.2679	0	1	NA		0.0578846	0	1	5.26765	0	1	NA		0.0578846	0	1	5.2679	0	1	NA
B0563.15	B0563.15	0	0.922911	0	0	0	0	0	0	0.969398	0	0	0	0.834399	0	0		0.208674	0.0478427	1.03372	4.3157	0.0110857	0.991155	NA		0.208674	-0.657965	0.633772	4.3157	-0.152459	0.878825	NA		0.208674	-0.884658	0.541616	4.31556	-0.204993	0.837578	NA		0.208674	-0.150887	0.900696	4.3157	-0.0349624	0.97211	NA
B0563.16	B0563.16	0	0	0.94198	0	0	0	0	0	0.969398	1.01185	0	0	0.834399	0	0.853785		0.31538	0.0478429	1.03372	3.03365	0.0157708	0.987417	NA		0.31538	-0.657968	0.63377	3.03365	-0.21689	0.828294	NA		0.31538	0.0770778	1.05488	3.0336	0.025408	0.979729	NA		0.31538	0.742521	1.6731	2.97623	0.249483	0.802987	NA
B0563.17	B0563.17	0	0	0	0	0	0	0	0	0	0	0	0	0	0	0		0.0578846	0	1	5.2679	0	1	NA		0.0578846	0	1	5.2679	0	1	NA		0.0578846	0	1	5.26765	0	1	NA		0.0578846	0	1	5.2679	0	1	NA
B0563.18	B0563.18	0.953277	2.76873	1.88396	0	0	0	0	0.943854	0	1.01185	0	0	0	0.850026	1.70757		0.852217	-2.42778	0.185852	1.79877	-1.34968	0.177117	NA		0.852217	-3.13359	0.113945	1.79877	-1.74207	0.0814961	NA		0.852217	-2.39853	0.189657	1.79876	-1.33344	0.182388	NA		0.852217	-1.13987	0.4538	1.59344	-0.715354	0.47439	NA
B0563.2	tsp-11	370.825	358.09	527.509	900.778	984.249	896.252	325.165	275.605	294.697	305.579	354.076	328.217	538.187	645.169	578.866		542.972	-0.48893	0.712553	0.156692	-3.12033	0.00180649	0.0171106		542.972	1.14651	2.21378	0.152192	7.53332	4.94652e-14	2.43009e-12		542.972	-0.346611	0.786429	0.156147	-2.21978	0.0264339	0.0710221		542.972	0.488111	1.40261	0.152623	3.19815	0.00138312	0.00454392
B0563.4	tmbi-4	1423.24	1280.08	1132.26	2072.03	1991.77	2157.98	1697.86	1351.6	1627.62	1710.03	2034.72	1676.57	1523.61	1618.45	1498.39		1709.21	0.28603	1.21928	0.122876	2.3278	0.0199226	0.0869024		1709.21	0.697958	1.62221	0.122695	5.68854	1.28128e-08	1.92396e-07		1709.21	0.499308	1.41353	0.122665	4.07051	4.69106e-05	0.000721341		1709.21	0.274861	1.20988	0.122661	2.24082	0.0250375	0.0532917
B0563.5	B0563.5	10.486	5.53747	0.94198	2.38301	1.16341	4.49813	0	6.60698	2.90819	4.0474	1.95083	5.91382	10.0128	5.95018	8.53785		4.75645	-0.817401	0.567463	0.846385	-0.965756	0.334166	NA		4.75645	-1.06716	0.477258	0.896997	-1.1897	0.234164	0.348356		4.75645	-0.509595	0.70242	0.824293	-0.61822	0.53643	NA		4.75645	0.532641	1.44658	0.760276	0.700589	0.48356	0.587992
B0563.6	B0563.6	61.0097	69.2183	130.935	131.066	117.505	112.453	54.0274	45.305	37.8065	48.5688	54.6233	38.4399	95.9559	88.4027	104.162		87.1747	-0.930316	0.524743	0.26941	-3.45316	0.000554067	0.00735056		87.1747	0.466767	1.38201	0.25401	1.83759	0.0661226	0.126907		87.1747	-0.882586	0.542394	0.26906	-3.28026	0.00103713	0.00639843		87.1747	0.143748	1.10477	0.252857	0.568494	0.5697	0.666259
B0563.7	B0563.7	31.4581	43.3768	37.6792	17.8726	22.1049	23.6152	24.0122	30.2033	18.4186	22.2607	27.3116	29.5691	45.892	49.3015	46.1044		32.5023	-0.630618	0.6459	0.294753	-2.13948	0.032397	0.117872		32.5023	-0.821933	0.565683	0.311413	-2.63937	0.00830598	0.0227828		32.5023	-0.507528	0.703427	0.29177	-1.73948	0.0819505	0.165027		32.5023	0.327446	1.25479	0.2675	1.2241	0.220915	0.320294
B0563.8	B0563.8	386.077	222.422	145.065	109.618	105.871	133.819	199.101	326.573	290.819	268.14	233.124	289.777	160.205	138.554	148.559		190.086	0.116455	1.08407	0.271884	0.428327	0.668413	0.795614		190.086	-1.10841	0.463804	0.279917	-3.9598	7.50131e-05	0.000389335		190.086	0.0702649	1.04991	0.272127	0.258206	0.796248	0.860868		190.086	-0.752066	0.593753	0.274558	-2.73918	0.0061592	0.0163304
B0563.9	B0563.9	0.953277	0.922911	0.94198	0	0	2.24906	0	2.83156	0.969398	1.01185	0	0.985637	0.834399	0	0.853785		0.697437	0.442674	1.35912	1.77287	0.249693	0.802825	NA		0.697437	-0.302376	0.810916	1.9161	-0.157808	0.874608	NA		0.697437	-0.502481	0.705892	1.91104	-0.262936	0.7926	NA		0.697437	-0.737506	0.599775	1.91239	-0.385647	0.699758	NA
B0564.1	exos-4.1	464.246	475.299	438.021	538.56	508.412	445.315	503.255	369.047	431.382	553.482	664.258	435.652	294.543	328.96	317.608		452.181	-0.0800867	0.946001	0.159209	-0.503029	0.614944	0.756884		452.181	0.115037	1.083	0.159419	0.721605	0.470538	0.591583		452.181	0.263373	1.20028	0.158252	1.66426	0.0960599	0.184993		452.181	-0.549797	0.683116	0.160211	-3.43171	0.000599798	0.00220918
B0564.10	unc-30	419.442	454.072	554.826	954.395	958.654	969.346	498.253	320.91	454.647	427.001	467.224	370.6	467.264	468.364	476.412		594.72	-0.165903	0.89137	0.162182	-1.02294	0.306334	0.491269		594.72	1.01292	2.01799	0.159853	6.33657	2.34932e-10	5.36023e-09		594.72	-0.175381	0.885534	0.162315	-1.0805	0.27992	0.407694		594.72	-0.0165922	0.988565	0.161129	-0.102975	0.917983	0.942377
B0564.11	rde-11	942.791	1003.2	1062.55	1143.84	1014.5	1032.32	1185.6	754.139	1002.36	1122.14	1305.11	1045.76	533.181	569.517	535.323		969.496	-0.0326237	0.977641	0.148735	-0.219341	0.826384	0.902027		969.496	0.0846762	1.06045	0.148968	0.56842	0.56975	0.680637		969.496	0.207153	1.15441	0.14842	1.39572	0.162799	0.27317		969.496	-0.877149	0.544442	0.150033	-5.84638	5.02378e-09	8.45487e-08
B0564.2	B0564.2	348.899	249.186	145.065	135.832	120.995	160.808	337.171	433.229	343.167	370.337	414.552	430.724	245.313	239.707	216.008		251.899	0.58393	1.49893	0.230811	2.52991	0.0114093	0.0609453		251.899	-0.830653	0.562275	0.239241	-3.47204	0.000516516	0.00210798		251.899	0.710259	1.6361	0.230554	3.08066	0.00206542	0.0106629		251.899	-0.0839012	0.943503	0.232316	-0.361152	0.717986	0.791621
B0564.3	best-1	106.767	71.0642	64.9966	44.0857	47.7	65.2229	83.0422	119.869	91.1234	96.1258	118.025	95.6068	106.803	102.853	102.454		80.8641	0.278295	1.21276	0.231938	1.19987	0.230191	0.409395		80.8641	-0.625632	0.648136	0.249542	-2.50712	0.012172	0.0314305		80.8641	0.352501	1.27677	0.231482	1.5228	0.127808	0.22823		80.8641	0.363072	1.28616	0.22928	1.58353	0.1133	0.18789
B0564.4	best-2	4.76638	3.69164	1.88396	0	2.32683	1.12453	0	0	1.9388	2.0237	1.95083	3.94255	2.5032	3.4001	5.12271		2.15794	-2.41311	0.187751	1.37363	-1.75674	0.0789617	NA		2.15794	-1.57525	0.335586	1.24151	-1.26881	0.204507	NA		2.15794	-0.384201	0.766203	1.05174	-0.365301	0.714887	NA		2.15794	0.0917418	1.06566	1.00281	0.0914843	0.927108	NA
B0564.6	B0564.6	165.87	165.201	267.522	281.195	365.312	355.352	112.057	96.2731	107.603	108.268	122.902	115.32	226.122	267.758	226.253		227.344	-0.922468	0.527606	0.195321	-4.72282	2.32591e-06	0.000146475		227.344	0.743579	1.67432	0.184821	4.02325	5.74009e-05	0.000311129		227.344	-0.788303	0.579025	0.194167	-4.05991	4.90916e-05	0.000737843		227.344	0.266763	1.20311	0.18492	1.44258	0.149138	0.234358
B0564.7	fask-1	1133.45	1147.18	880.751	1099.76	1006.35	1019.95	1269.64	988.215	1213.69	1171.72	1186.11	1033.93	825.221	942.678	840.125		1026.99	0.134771	1.09792	0.132142	1.0199	0.307777	0.492355		1026.99	-0.0163215	0.988751	0.132859	-0.122849	0.902227	0.934897		1026.99	0.101437	1.07284	0.132239	0.767068	0.443041	0.567556		1026.99	-0.277655	0.824931	0.132493	-2.09562	0.0361159	0.0725476
B0564.9	B0564.9	147.758	154.126	248.683	264.514	339.717	332.861	102.052	84.003	98.8786	96.1258	109.247	105.463	208.6	249.058	209.177		210.471	-0.951044	0.517258	0.20211	-4.70557	2.53162e-06	0.000156202		210.471	0.767772	1.70264	0.190594	4.02831	5.61791e-05	0.000304895		210.471	-0.824319	0.564749	0.200959	-4.10193	4.09715e-05	0.000661753		210.471	0.276434	1.2112	0.190767	1.44907	0.147319	0.231928
BE0003N10.1	BE0003N10.1	272.637	351.629	441.788	470.644	431.627	367.722	334.17	185.939	281.125	252.963	181.427	183.329	245.313	272.858	252.72		313.559	-0.412902	0.751111	0.216704	-1.90537	0.0567316	0.168143		313.559	0.25216	1.19099	0.215261	1.17142	0.241431	0.356733		313.559	-0.787832	0.579214	0.218578	-3.60436	0.000312928	0.00268309		313.559	-0.467815	0.723059	0.21615	-2.16431	0.0304405	0.0628327
BE0003N10.2	chin-1	625.35	655.267	632.068	664.86	749.239	626.364	656.333	616.337	764.855	621.276	525.749	562.799	496.468	513.415	490.927		604.008	0.0910807	1.06517	0.12335	0.738394	0.460275	0.635002		604.008	0.0930911	1.06665	0.124121	0.75	0.453255	0.575429		604.008	-0.162039	0.893761	0.124215	-1.3045	0.192064	0.308971		604.008	-0.349914	0.784631	0.124082	-2.82002	0.00480209	0.0131846
BE0003N10.3	BE0003N10.3	599.611	710.642	897.707	1324.95	1336.76	1276.34	765.389	580.47	748.375	739.662	543.307	616.023	866.106	939.278	910.989		864.154	-0.0766179	0.948278	0.1591	-0.48157	0.630111	0.768047		864.154	0.834693	1.78348	0.157989	5.28324	1.26916e-07	1.44759e-06		864.154	-0.217772	0.859892	0.15948	-1.36552	0.17209	0.284987		864.154	0.298896	1.2302	0.1581	1.89055	0.0586851	0.109094
BE0003N10.6	BE0003N10.6	10.486	11.0749	4.7099	9.53204	2.32683	4.49813	7.00356	11.3262	6.78578	13.1541	9.75416	12.8133	10.0128	8.50026	14.5143		8.68308	-0.0619464	0.957971	0.547504	-0.113143	0.909917	NA		8.68308	-0.691985	0.619002	0.606477	-1.14099	0.253874	0.371468		8.68308	0.441594	1.3581	0.526568	0.838628	0.401678	NA		8.68308	0.328825	1.25599	0.522341	0.629523	0.529007	0.630049
BE0003N10.t1	BE0003N10.t1	0	0	0	0	0	0	0	0	0	0	0	0	0.834399	0.850026	0		0.0935792	0	1	5.2679	0	1	NA		0.0935792	0	1	5.2679	0	1	NA		0.0935792	0	1	5.26765	0	1	NA		0.0935792	1.7008	3.25081	5.2353	0.324871	0.745279	NA
BE0003N10.t2	BE0003N10.t2	0	0	0	0	0	0	0	0	0	0	0.975416	0	0	0	0		0.0541898	0	1	5.2679	0	1	NA		0.0541898	0	1	5.2679	0	1	NA		0.0541898	1.03881	2.05453	5.26765	0.197205	0.843667	NA		0.0541898	0	1	5.2679	0	1	NA
BE0003N10.t3	BE0003N10.t3	0	0	0	0	0	0	0	0	0	0	0	0	0	0	0.853785		0.0474325	0	1	5.2679	0	1	NA		0.0474325	0	1	5.2679	0	1	NA		0.0474325	0	1	5.26765	0	1	NA		0.0474325	0.810897	1.7543	5.2679	0.153932	0.877664	NA
BE0003N10.t4	BE0003N10.t4	0	0	0	1.1915	0	0	0	0	0.969398	0	0	0	0	0	0		0.12005	1.00963	2.01339	5.2679	0.191656	0.848012	NA		0.12005	1.2656	2.40428	5.2679	0.240248	0.810138	NA		0.12005	0	1	5.26765	0	1	NA		0.12005	0	1	5.2679	0	1	NA
BE0003N10.t5	BE0003N10.t5	0.953277	1.84582	0.94198	1.1915	2.32683	0	0	0	0.969398	2.0237	0	0	0	0.850026	0		0.733189	-1.84411	0.278527	1.92336	-0.958798	0.337661	NA		0.733189	-0.0979914	0.934333	1.73237	-0.0565649	0.954892	NA		0.733189	-0.90497	0.534044	1.8282	-0.495006	0.620596	NA		0.733189	-2.04284	0.242685	1.92336	-1.06212	0.28818	NA
BE0003N10.t6	BE0003N10.t6	2.85983	2.76873	0	0	0	2.24906	2.00102	0	0	1.01185	1.95083	0	1.6688	0	1.70757		1.01736	-1.51596	0.349664	1.76985	-0.856543	0.391698	NA		1.01736	-1.3	0.406126	1.77799	-0.731162	0.46468	NA		1.01736	-0.924311	0.526932	1.67362	-0.552284	0.580754	NA		1.01736	-0.736568	0.600165	1.6208	-0.454447	0.649507	NA
BE10.1	BE10.1	0.953277	0	2.82594	0	0	0	1.00051	0	0	2.0237	0	0.985637	0	0	0		0.491916	-1.85509	0.276415	2.64839	-0.700461	0.483639	NA		0.491916	-2.5609	0.169469	2.64839	-0.966967	0.33356	NA		0.491916	-0.331047	0.794959	2.51265	-0.131752	0.89518	NA		0.491916	-3.01562	0.123654	2.64839	-1.13866	0.254844	NA
BE10.2	agmo-1	935.165	1078.88	1594.77	1015.16	1230.89	1303.33	690.35	722.048	709.599	724.485	798.866	760.912	1553.65	1772.3	1815.15		1234.77	-0.766073	0.588016	0.168409	-4.54889	5.39286e-06	0.000266841		1234.77	-0.0238091	0.983632	0.167597	-0.142061	0.887031	0.924959		1234.77	-0.659755	0.632986	0.168261	-3.92102	8.81737e-05	0.0010987		1234.77	0.510516	1.42456	0.166587	3.06455	0.00217996	0.00672503
BE10.3	BE10.3	136.319	186.428	210.061	272.855	188.473	202.416	205.104	162.343	193.88	165.943	125.829	140.946	96.7903	85.8526	93.0626		180.08	0.0742666	1.05283	0.194362	0.382104	0.702384	0.819181		180.08	0.31587	1.24476	0.194455	1.62438	0.104294	0.183728		180.08	-0.301148	0.811606	0.197339	-1.52605	0.126998	0.227233		180.08	-0.95071	0.517378	0.201397	-4.72058	2.35169e-06	1.86186e-05
BE10.4	BE10.4	63.8696	41.531	49.9249	36.9367	32.5756	38.2341	46.0234	37.7542	38.7759	43.5096	36.0904	57.167	41.72	35.7011	38.4203		41.5131	-0.341935	0.788982	0.279163	-1.22486	0.220628	0.398479		41.5131	-0.526189	0.694387	0.289517	-1.81747	0.0691452	0.131278		41.5131	-0.182635	0.881092	0.276602	-0.660281	0.509073	0.62662		41.5131	-0.421747	0.74652	0.276813	-1.52358	0.127613	0.206963
BE10.5	BE10.5	27.645	17.5353	11.3038	5.95752	8.1439	10.1208	18.0091	17.9332	10.6634	29.3437	9.75416	21.684	10.8472	5.95018	6.83028		12.5731	-0.276469	0.825609	0.485013	-0.570023	0.568662	0.721599		12.5731	-1.2165	0.430327	0.539649	-2.25424	0.0241813	0.0557258		12.5731	0.104328	1.07499	0.475244	0.219525	0.826241	NA		12.5731	-1.25457	0.41912	0.516044	-2.43112	0.0150523	0.0347776
BE10.6	BE10.6	0	0	0	0	0	0	0	0	0	0	0.975416	0	0.834399	0	0		0.100545	0	1	5.2679	0	1	NA		0.100545	0	1	5.2679	0	1	NA		0.100545	1.03882	2.05455	5.26765	0.197208	0.843665	NA		0.100545	0.810897	1.7543	5.2679	0.153932	0.877664	NA
BE10.7	BE10.7	0	0	0.94198	1.1915	0	2.24906	0	0	0	1.01185	0	0	0	0	0		0.41607	-0.91395	0.53073	2.85939	-0.319631	0.749248	NA		0.41607	1.77202	3.41532	2.73653	0.647544	0.51728	NA		0.41607	0.0770792	1.05488	2.85935	0.0269569	0.978494	NA		0.41607	-1.11268	0.462434	2.85939	-0.389132	0.697178	NA
C01A2.1	C01A2.1	181.123	214.115	229.843	557.624	636.388	566.764	266.135	163.287	214.237	220.583	201.911	217.826	149.357	134.304	113.553		289.368	0.0406036	1.02854	0.171804	0.236336	0.813172	0.892141		289.368	1.49388	2.81646	0.166566	8.96872	2.99987e-19	3.20703e-17		289.368	0.0343829	1.02412	0.172031	0.199865	0.841586	0.893071		289.368	-0.653942	0.635541	0.175514	-3.72586	0.000194648	0.000841248
C01A2.10	C01A2.10	0	0	0.94198	0	0	0	0	0	0	0	0	0	0	0	0		0.0523322	-0.913941	0.530733	5.2679	-0.173492	0.862264	NA		0.0523322	-0.657962	0.633773	5.2679	-0.1249	0.900603	NA		0.0523322	-0.884666	0.541613	5.26765	-0.167943	0.866628	NA		0.0523322	-1.11267	0.462437	5.2679	-0.211217	0.832718	NA
C01A2.2	C01A2.2	813.145	581.434	418.239	490.9	421.156	477.926	500.254	1130.74	870.519	598.003	912.989	839.763	1467.71	1183.24	1292.63		735.391	0.464897	1.38022	0.259561	1.79109	0.073279	0.197589		735.391	-0.383102	0.766787	0.261344	-1.46589	0.142678	0.236471		735.391	0.375065	1.2969	0.259695	1.44426	0.148667	0.256054		735.391	1.12136	2.17552	0.258864	4.33185	1.47862e-05	9.17287e-05
C01A2.3	oxa-1	676.827	703.258	686.703	686.307	744.585	702.832	742.377	765.465	810.416	738.651	958.834	785.553	614.118	683.421	593.381		696.886	0.165672	1.12169	0.11435	1.44882	0.147389	0.307447		696.886	0.0459756	1.03238	0.115478	0.398132	0.690533	0.780331		696.886	0.264948	1.20159	0.114169	2.32067	0.0203044	0.0588225		696.886	-0.128361	0.91487	0.114609	-1.11999	0.262718	0.367319
C01A2.4	C01A2.4	2159.17	1670.47	997.556	676.775	656.166	724.199	1598.81	3093.01	2289.72	1978.17	2244.43	2342.86	1596.21	1423.79	1408.75		1473.91	0.532476	1.44641	0.236069	2.25559	0.0240962	0.0979416		1473.91	-1.23048	0.426176	0.237934	-5.17152	2.32197e-07	2.43661e-06		1473.91	0.443748	1.36013	0.236121	1.87932	0.0602005	0.131384		1473.91	-0.124253	0.917479	0.236298	-0.525833	0.599004	0.691703
C01A2.5	tads-1	5835.96	4188.17	2526.39	2381.82	2042.96	2298.54	4923.5	7514.02	6280.73	5807.01	6314.84	6633.34	3537.02	3321.05	2918.24		3992.38	0.576738	1.49147	0.222733	2.58936	0.00961538	0.0544955		3992.38	-0.900492	0.535704	0.223296	-4.03272	5.51338e-05	0.000299701		3992.38	0.579561	1.49439	0.222738	2.60199	0.00926858	0.032684		3992.38	-0.360365	0.778968	0.222895	-1.61674	0.105934	0.177678
C01A2.6	C01A2.6	0	0.922911	0.94198	0	2.32683	2.24906	1.00051	3.77542	0	0	0.975416	0	0.834399	0.850026	0		0.946491	1.35885	2.56481	1.73071	0.785143	0.43237	NA		0.946491	1.29672	2.4567	1.76044	0.736591	0.461371	NA		0.946491	-0.814313	0.568679	1.99049	-0.409101	0.682465	NA		0.946491	-0.149158	0.901777	1.90191	-0.0784256	0.937489	NA
C01A2.7	nlp-38	214.487	185.505	137.529	163.236	174.512	220.408	111.056	239.739	192.91	149.754	214.592	216.84	255.326	251.608	280.042		212.213	0.0178876	1.01248	0.240694	0.0743169	0.940758	0.970038		212.213	0.0550909	1.03892	0.241954	0.227692	0.819886	0.876891		212.213	0.113196	1.08162	0.240347	0.470969	0.637663	0.73554		212.213	0.550064	1.46415	0.237606	2.31502	0.0206117	0.0453361
C01A2.8	C01A2.8	4.76638	2.76873	5.65188	13.1066	4.65366	7.87172	3.00152	4.71927	11.6328	8.0948	2.92625	4.92819	0	0.850026	3.41514		5.33993	0.55751	1.47173	0.739204	0.754202	0.450728	NA		5.33993	0.957992	1.9426	0.732451	1.30793	0.190899	0.296798		5.33993	0.272288	1.20772	0.756184	0.360081	0.718786	NA		5.33993	-1.63519	0.321928	0.92602	-1.76583	0.077425	0.136877
C01A2.9	C01A2.9	9.53277	3.69164	0	2.38301	1.16341	1.12453	5.00254	16.9894	3.87759	3.03555	0	1.97127	2.5032	3.4001	4.26893		3.68177	0.974604	1.9651	0.912268	1.06833	0.285371	NA		3.68177	-1.50541	0.35223	1.12843	-1.33408	0.182177	NA		3.68177	-1.4074	0.37699	1.08108	-1.30185	0.192969	NA		3.68177	-0.376897	0.770092	0.96309	-0.391341	0.695545	NA
C01B10.1	drh-2	41.9442	56.2976	152.601	90.5544	111.688	82.0908	48.0244	27.3718	31.0207	29.3437	16.5821	41.3968	85.9431	96.9029	75.9869		73.679	-1.23897	0.423674	0.388511	-3.18903	0.00142749	0.0143611		73.679	0.180637	1.13338	0.374715	0.482065	0.62976	0.730494		73.679	-1.52294	0.347976	0.394398	-3.86144	0.000112723	0.00132369		73.679	0.0452967	1.0319	0.372457	0.121616	0.903203	0.931423
C01B10.10	cest-5.2	213.534	246.417	215.713	201.364	236.173	239.525	236.12	307.696	239.441	288.377	320.912	262.18	366.301	391.012	363.713		272.734	0.213696	1.15966	0.155866	1.37102	0.170369	0.336412		272.734	0.00331061	1.0023	0.158992	0.0208225	0.983387	0.989734		272.734	0.366978	1.28965	0.155182	2.36481	0.0180391	0.0539142		272.734	0.730136	1.6588	0.152598	4.78472	1.71229e-06	1.40335e-05
C01B10.11	C01B10.11	3737.8	3464.61	3977.98	5638.2	6283.6	6451.44	3269.66	4592.79	3690.5	3297.62	4390.35	3890.31	6663.51	7176.77	6995.06		4925.42	0.0473946	1.0334	0.135844	0.348891	0.727171	0.835753		4925.42	0.716675	1.64339	0.135683	5.28198	1.27794e-07	1.45495e-06		4925.42	0.0505126	1.03563	0.135855	0.371812	0.710033	0.794523		4925.42	0.898072	1.86357	0.13551	6.62734	3.41785e-11	1.0393e-09
C01B10.12	21ur-8461	0	0.922911	1.88396	0	0	0	0	1.88771	0	1.01185	0.975416	0	3.3376	0.850026	0.853785		0.708482	-0.554686	0.680805	1.99207	-0.278447	0.780669	NA		0.708482	-2.13536	0.227611	2.07362	-1.02977	0.303117	NA		0.708482	-0.502417	0.705923	1.98785	-0.252744	0.800466	NA		0.708482	0.845051	1.79633	1.80584	0.467953	0.639818	NA
C01B10.14	21ur-15647	0	0	2.82594	1.1915	1.16341	3.3736	0	0	0.969398	0	0	0	2.5032	1.70005	0		1.05396	-1.43522	0.369792	1.90308	-0.754153	0.450757	NA		1.05396	1.02729	2.03819	1.62903	0.630611	0.528295	NA		1.05396	-2.36775	0.193748	1.90307	-1.24417	0.213435	NA		1.05396	0.577923	1.4927	1.62855	0.354871	0.722687	NA
C01B10.16	21ur-12718	6.67294	3.69164	7.53584	5.95752	3.49024	5.62266	7.00356	6.60698	8.72458	7.08295	8.77874	5.91382	9.17839	9.35028	7.68407		6.61059	0.321768	1.24986	0.576426	0.558211	0.5767	NA		6.61059	-0.24562	0.843453	0.633954	-0.387441	0.69843	0.786418		6.61059	0.286277	1.21949	0.580018	0.493565	0.621613	NA		6.61059	0.553396	1.46754	0.555813	0.995651	0.31942	0.426948
C01B10.17	21ur-6657	0	0	0	0	0	0	0	0	0	0	0.975416	0	0	0	0		0.0541898	0	1	5.2679	0	1	NA		0.0541898	0	1	5.2679	0	1	NA		0.0541898	1.03881	2.05453	5.26765	0.197205	0.843667	NA		0.0541898	0	1	5.2679	0	1	NA
C01B10.18	21ur-12161	0	0	0	0	0	0	1.00051	0	0	0	0	0	0	0.850026	0		0.160692	1.00963	2.01339	5.2679	0.191656	0.848012	NA		0.160692	0	1	5.2679	0	1	NA		0.160692	0	1	5.26765	0	1	NA		0.160692	0.810897	1.7543	5.2679	0.153932	0.877664	NA
C01B10.19	21ur-7473	0	0	0	0	2.32683	0	1.00051	3.77542	0	0	0	0	2.5032	0	0.853785		0.638287	3.20731	9.23627	2.56503	1.2504	0.211154	NA		0.638287	2.16499	4.48464	2.68244	0.807099	0.41961	NA		0.638287	0	1	2.74673	0	1	NA		0.638287	2.69729	6.48585	2.58476	1.04354	0.296699	NA
C01B10.23	21ur-11403	0	0	0	0	0	0	0	0	0	1.01185	0	0	0	0	0		0.0562139	0	1	5.2679	0	1	NA		0.0562139	0	1	5.2679	0	1	NA		0.0562139	1.03881	2.05453	5.26765	0.197205	0.843667	NA		0.0562139	0	1	5.2679	0	1	NA
C01B10.24	21ur-14775	2.85983	2.76873	1.88396	1.1915	1.16341	1.12453	0	2.83156	2.90819	1.01185	3.90166	3.94255	3.3376	3.4001	2.56136		2.05454	-0.375705	0.770729	1.0374	-0.362161	0.717232	NA		2.05454	-1.11116	0.462921	1.19205	-0.932141	0.351264	NA		2.05454	0.242177	1.18278	0.979429	0.247263	0.804704	NA		2.05454	0.308139	1.23811	0.957345	0.321868	0.747552	NA
C01B10.26	21ur-6055	0	0	1.88396	1.1915	1.16341	2.24906	1.00051	0	0.969398	0	0	0	2.5032	1.70005	0		0.93685	0.0542411	1.03831	1.85317	0.0292693	0.97665	NA		0.93685	1.29602	2.45551	1.70938	0.758182	0.448342	NA		0.93685	-1.78223	0.290733	1.946	-0.915845	0.359748	NA		0.93685	1.16371	2.24032	1.67849	0.693308	0.488116	NA
C01B10.28	21ur-11007	0	0	0	0	1.16341	0	0	0.943854	0	0	0	0	0.834399	0.850026	0		0.21065	1.00963	2.0134	4.30738	0.234396	0.814678	NA		0.21065	1.26561	2.40429	4.30738	0.293824	0.768892	NA		0.21065	0	1	4.30724	0	1	NA		0.21065	1.70106	3.2514	4.26741	0.398617	0.690176	NA
C01B10.3	C01B10.3	40.0376	24.9186	48.9829	15.4896	15.1244	21.3661	23.0117	42.4734	32.9595	26.3081	39.0166	35.4829	35.8792	36.5511	41.8355		30.9328	-0.206197	0.866819	0.313576	-0.657568	0.510816	0.677413		30.9328	-1.12786	0.457594	0.352384	-3.20066	0.00137115	0.00489227		30.9328	-0.173897	0.886445	0.313505	-0.554686	0.579109	0.686791		30.9328	0.00521771	1.00362	0.305386	0.0170856	0.986368	0.991126
C01B10.31	21ur-14537	0	0	0	0	0	0	0	0	0	0	0	0	0	0	0		0.23215	0	1	4.81204	0	1	NA		0.23215	0	1	4.81204	0	1	NA		0.23215	0	1	4.81185	0	1	NA		0.23215	0	1	4.81204	0	1	NA
C01B10.32	21ur-6875	0	0	0	0	2.32683	2.24906	0	0	0	0	0	0	0	0	0		0.427788	0	1	3.51129	0	1	NA		0.427788	3.14402	8.83982	3.3865	0.928396	0.353202	NA		0.427788	0	1	3.51121	0	1	NA		0.427788	0	1	3.51129	0	1	NA
C01B10.33	21ur-13554	0.953277	0	0	0	0	0	0	0	0	0	0	0	0.834399	0.850026	0.853785		0.251856	-0.913948	0.530731	3.56009	-0.25672	0.797395	NA		0.251856	-0.657967	0.633771	3.56009	-0.184817	0.853372	NA		0.251856	-0.884676	0.541609	3.56001	-0.248504	0.803745	NA		0.251856	1.33006	2.51413	3.46128	0.384267	0.700781	NA
C01B10.34	21ur-12302	5.71966	2.76873	6.59386	4.76602	2.32683	4.49813	6.00305	5.66312	6.78578	7.08295	7.80333	5.91382	9.17839	8.50026	5.9765		5.85002	0.293829	1.22589	0.625485	0.469762	0.638525	NA		5.85002	-0.376524	0.770291	0.699898	-0.53797	0.590598	0.697539		5.85002	0.467236	1.38246	0.617102	0.757145	0.448963	NA		5.85002	0.653576	1.57306	0.596717	1.09529	0.273391	0.378676
C01B10.35	21ur-13538	0	0	0	0	0	1.12453	0	0	0	0	0	0	0	0	0		0.062474	0	1	5.2679	0	1	NA		0.062474	1.2656	2.40428	5.2679	0.240248	0.810138	NA		0.062474	0	1	5.26765	0	1	NA		0.062474	0	1	5.2679	0	1	NA
C01B10.36	21ur-7352	0	0	0	0	0	0	0	0	0	1.01185	0	0	0	0	0		0.0562139	0	1	5.2679	0	1	NA		0.0562139	0	1	5.2679	0	1	NA		0.0562139	1.03881	2.05453	5.26765	0.197205	0.843667	NA		0.0562139	0	1	5.2679	0	1	NA
C01B10.4	cest-5.1	61.0097	64.6038	52.7509	86.9799	77.9488	79.8418	68.0345	100.992	60.1026	77.9125	82.9104	76.8797	82.6055	83.3025	77.6945		76.2251	0.363302	1.28637	0.216441	1.67853	0.0932435	0.229622		76.2251	0.455821	1.37156	0.218867	2.08263	0.0372846	0.0790821		76.2251	0.414189	1.33255	0.216137	1.91633	0.055323	0.123146		76.2251	0.449474	1.36554	0.212763	2.11256	0.0346387	0.0701106
C01B10.40	21ur-8058	0	0	0	0	0	0	0	0	0	0	0	0	0	0	0		0.23215	0	1	4.81204	0	1	NA		0.23215	0	1	4.81204	0	1	NA		0.23215	0	1	4.81185	0	1	NA		0.23215	0	1	4.81204	0	1	NA
C01B10.41	21ur-13556	0	0	0	0	0	0	0	0	0	0	0	1.97127	0	0	0		0.109515	0	1	5.2679	0	1	NA		0.109515	0	1	5.2679	0	1	NA		0.109515	1.92765	3.80435	5.23513	0.368214	0.712714	NA		0.109515	0	1	5.2679	0	1	NA
C01B10.42	21ur-5798	0	0	0	0	0	0	0	0	0	0	0	0	0	0	0		0.0591905	0	1	5.2679	0	1	NA		0.0591905	0	1	5.2679	0	1	NA		0.0591905	0	1	5.26765	0	1	NA		0.0591905	0	1	5.2679	0	1	NA
C01B10.43	21ur-6319	0	0	0	0	0	0	0	0	0	1.01185	0	0	0	0	0		0.0562139	0	1	5.2679	0	1	NA		0.0562139	0	1	5.2679	0	1	NA		0.0562139	1.03881	2.05453	5.26765	0.197205	0.843667	NA		0.0562139	0	1	5.2679	0	1	NA
C01B10.44	C01B10.44	0.953277	1.84582	0	0	0	0	0	0.943854	0.969398	1.01185	0	0.985637	0	0.850026	0.853785		0.583194	-0.542567	0.686548	2.05272	-0.264316	0.791536	NA		0.583194	-2.13261	0.228044	2.13355	-0.99956	0.317524	NA		0.583194	-0.495485	0.709323	2.04955	-0.241753	0.808972	NA		0.583194	-0.72418	0.605341	2.0497	-0.353311	0.723856	NA
C01B10.45	C01B10.45	1.90655	2.76873	7.53584	9.53204	13.961	19.117	3.00152	0.943854	2.90819	2.0237	2.92625	2.95691	3.3376	5.10015	1.70757		5.70432	-0.842261	0.557769	0.820605	-1.02639	0.304707	NA		5.70432	1.80629	3.49741	0.658189	2.74433	0.00606345	0.0174867		5.70432	-0.624501	0.648644	0.798164	-0.782422	0.433967	NA		5.70432	-0.266744	0.831193	0.74175	-0.359614	0.719136	0.792471
C01B10.46	C01B10.46	5.71966	8.3062	3.76792	11.915	5.81707	13.4944	5.00254	5.66312	7.75518	6.0711	3.90166	5.91382	8.34399	6.8002	6.83028		7.12587	0.0485314	1.03421	0.598321	0.0811127	0.935352	NA		7.12587	0.810538	1.75387	0.57058	1.42055	0.155448	0.252682		7.12587	-0.16817	0.889971	0.615114	-0.273397	0.784548	NA		7.12587	0.302659	1.23342	0.573115	0.528094	0.597434	0.690359
C01B10.47	C01B10.47	8.57949	11.9978	15.0717	17.8726	16.2878	15.7434	16.0081	17.9332	12.6022	12.1422	19.5083	15.7702	20.0256	17.8505	17.9295		15.8564	0.384531	1.30544	0.403294	0.953477	0.340348	0.525949		15.8564	0.483189	1.39783	0.409445	1.18011	0.237957	0.352826		15.8564	0.412945	1.3314	0.403326	1.02385	0.305906	NA		15.8564	0.645863	1.56467	0.388329	1.66319	0.0962752	0.164306
C01B10.48	C01B10.48	3.81311	4.61456	7.53584	22.6386	25.5951	23.6152	3.00152	0.943854	0.969398	4.0474	0.975416	0	2.5032	5.95018	4.26893		8.63165	-1.7153	0.304538	0.822424	-2.08567	0.0370088	NA		8.63165	2.17012	4.50061	0.542592	3.99955	6.34634e-05	0.000337637		8.63165	-1.68556	0.310882	0.822363	-2.04966	0.0403978	NA		8.63165	-0.330071	0.795497	0.632028	-0.52224	0.601503	0.693646
C01B10.49	C01B10.49	0.953277	0.922911	0.94198	1.1915	0	0	0	0.943854	1.9388	3.03555	0.975416	0.985637	1.6688	2.55008	0.853785		0.94231	0.0410351	1.02885	1.585	0.0258896	0.979345	NA		0.94231	-1.17706	0.442253	1.78962	-0.657712	0.510723	NA		0.94231	0.821017	1.76665	1.49313	0.549862	0.582414	NA		0.94231	0.848484	1.80061	1.47045	0.577022	0.563925	NA
C01B10.5	hil-7	20062.7	17177.2	17215.6	23690.7	25817.3	28034.6	16757.5	20577.9	20698.6	16760.3	20853.4	21853.6	34246.2	32567.9	30324.7		22878.5	0.0918368	1.06573	0.129276	0.710395	0.477459	0.649387		22878.5	0.509925	1.42398	0.129261	3.94491	7.98289e-05	0.000411192		22878.5	0.127031	1.09204	0.129275	0.982644	0.325782	0.453629		22878.5	0.834977	1.78383	0.129211	6.46212	1.03248e-10	2.80802e-09
C01B10.6	C01B10.6	691.126	711.565	1201.97	1388.1	1666.01	1567.6	486.247	512.513	540.924	526.162	474.052	521.402	1064.69	1189.19	1215.79		1105.35	-0.758366	0.591165	0.177236	-4.27885	1.87864e-05	0.000676844		1105.35	0.827412	1.7745	0.174992	4.72829	2.26418e-06	1.83531e-05		1105.35	-0.775528	0.584175	0.177357	-4.3727	1.22717e-05	0.000295109		1105.35	0.413706	1.3321	0.17495	2.36472	0.0180438	0.0405605
C01B10.7	C01B10.7	1.90655	0	0	0	0	0	0	3.77542	0.969398	0	0	0.985637	0.834399	0.850026	0.853785		0.56529	1.32885	2.51203	2.29658	0.578621	0.562845	NA		0.56529	-1.56771	0.337343	2.49752	-0.627708	0.530195	NA		0.56529	-0.83266	0.561493	2.49749	-0.333398	0.738834	NA		0.56529	0.420295	1.3382	2.35454	0.178504	0.858327	NA
C01B10.8	C01B10.8	882.734	1007.82	919.372	973.46	850.456	809.663	1071.54	687.126	846.284	970.364	817.399	826.95	508.149	532.116	482.389		822.277	-0.109775	0.926733	0.149299	-0.735267	0.462177	0.636219		822.277	-0.0937788	0.937065	0.149769	-0.626155	0.531213	0.646956		822.277	-0.10407	0.930404	0.149342	-0.69686	0.485891	0.60577		822.277	-0.884	0.541863	0.150568	-5.87112	4.32867e-09	7.43771e-08
C01B10.9	C01B10.9	859.856	892.455	788.437	712.52	675.944	656.727	1110.56	930.64	1059.55	1015.9	991.998	1033.93	710.908	603.518	562.645		805.017	0.287062	1.22015	0.11236	2.55486	0.0106232	0.0583502		805.017	-0.313265	0.804818	0.114687	-2.73149	0.00630487	0.0180361		805.017	0.259619	1.19716	0.112475	2.30823	0.0209864	0.0602545		805.017	-0.436619	0.738864	0.113625	-3.84263	0.000121725	0.000561488
C01B12.1	sqt-2	40.0376	38.7623	21.6655	29.7876	38.3927	23.6152	25.0127	39.6419	25.2043	34.4029	44.8691	27.5978	42.5544	51.0015	42.6893		39.0659	-0.158293	0.896085	0.319598	-0.495288	0.620397	0.760683		39.0659	-0.131967	0.912586	0.3256	-0.405305	0.685253	0.776529		39.0659	0.0896657	1.06412	0.314618	0.284999	0.775645	0.845546		39.0659	0.43921	1.35586	0.304338	1.44317	0.148974	0.234143
C01B12.10	C01B12.10	0	0	0	0	0	0	0	0	0	0	0	0	0	0	0.853785		0.0474325	0	1	5.2679	0	1	NA		0.0474325	0	1	5.2679	0	1	NA		0.0474325	0	1	5.26765	0	1	NA		0.0474325	0.810897	1.7543	5.2679	0.153932	0.877664	NA
C01B12.2	gmeb-1	914.193	1038.28	1234.94	1751.51	1634.6	1660.93	1218.62	793.781	950.979	988.578	1146.11	925.513	1048.84	998.78	933.187		1172.58	-0.105509	0.929477	0.155905	-0.676747	0.498567	0.66767		1172.58	0.663	1.58337	0.15525	4.27054	1.95001e-05	0.000120009		1172.58	-0.0587272	0.960111	0.155879	-0.376749	0.70636	0.791357		1172.58	-0.0966775	0.935184	0.155612	-0.621274	0.534419	0.634938
C01B12.3	best-3	235.459	223.345	248.683	258.557	232.683	301.375	234.119	257.672	251.074	225.643	277.018	267.108	403.849	436.913	383.35		269.308	0.0709257	1.05039	0.138771	0.511099	0.609281	0.752346		269.308	0.164838	1.12104	0.139931	1.178	0.238798	0.353733		269.308	0.122407	1.08855	0.13862	0.883037	0.377216	0.505206		269.308	0.791113	1.73041	0.134074	5.90058	3.62231e-09	6.36733e-08
C01B12.4	osta-1	36.2245	46.1456	51.8089	79.8308	70.9683	77.5927	24.0122	35.8664	24.2349	30.3555	25.3608	30.5548	73.4271	81.6025	101.6		53.3981	-0.671039	0.628054	0.270302	-2.48255	0.0130446	0.0664435		53.3981	0.766617	1.70128	0.244257	3.13856	0.00169778	0.00587996		53.3981	-0.638603	0.642335	0.270205	-2.3634	0.0181081	0.0540496		53.3981	0.934417	1.91112	0.236554	3.95013	7.81093e-05	0.000383356
C01B12.5	best-4	4.76638	13.8437	29.2014	5.95752	18.6146	11.2453	10.0051	14.1578	9.69398	5.05925	14.6312	16.7558	22.5288	20.4006	26.4673		15.3079	-0.496813	0.70867	0.539594	-0.920717	0.357198	0.542872		15.3079	-0.415524	0.749747	0.546657	-0.760117	0.447185	0.570535		15.3079	-0.389284	0.763509	0.536665	-0.725375	0.468222	NA		15.3079	0.536576	1.45053	0.506875	1.0586	0.289784	0.39577
C01B12.8	C01B12.8	1484.25	1153.64	684.819	363.409	350.188	333.986	1015.52	1529.04	1356.19	1191.96	1224.15	1553.36	756.8	640.069	639.485		828.911	0.231543	1.17409	0.223322	1.03681	0.299825	0.484501		828.911	-1.66536	0.315265	0.227286	-7.32715	2.35102e-13	1.02732e-11		828.911	0.256641	1.19469	0.223326	1.14918	0.250482	0.376392		828.911	-0.706296	0.612892	0.224097	-3.15174	0.00162299	0.00520325
C01B12.9	C01B12.9	280.263	263.953	242.089	392.005	419.993	353.103	313.159	272.774	301.483	356.171	292.625	289.777	236.135	232.057	210.885		290.875	0.174155	1.1283	0.13915	1.25156	0.210728	0.38736		290.875	0.567028	1.48147	0.138407	4.09682	4.18859e-05	0.000235768		290.875	0.254984	1.19332	0.138861	1.83625	0.0663208	0.141193		290.875	-0.211291	0.863764	0.140275	-1.50626	0.132001	0.212738
C01B4.1	str-257	0	1.84582	0.94198	0	1.16341	3.3736	2.00102	0.943854	1.9388	0	0	0.985637	1.6688	0	1.70757		0.977773	0.797621	1.73823	1.56829	0.508593	0.611038	NA		0.977773	0.708576	1.63419	1.60362	0.441861	0.65859	NA		0.977773	-1.39614	0.379946	1.85263	-0.753597	0.451091	NA		0.977773	0.269912	1.20573	1.6018	0.168506	0.866185	NA
C01B4.10	str-76	0	0.922911	0	0	0	0	0	0	0	0	0	0	0	0	0		0.0512728	-0.913941	0.530733	5.2679	-0.173492	0.862264	NA		0.0512728	-0.657962	0.633773	5.2679	-0.1249	0.900603	NA		0.0512728	-0.884666	0.541613	5.26765	-0.167943	0.866628	NA		0.0512728	-1.11267	0.462437	5.2679	-0.211217	0.832718	NA
C01B4.3	str-258	0	0	0	1.1915	1.16341	4.49813	1.00051	0	0	1.01185	0	0	0	1.70005	0.853785		0.925743	1.00964	2.01341	2.05699	0.490832	0.623545	NA		0.925743	3.73171	13.2848	1.78722	2.088	0.0367981	NA		0.925743	1.03888	2.05463	2.05698	0.505052	0.613522	NA		0.925743	2.29637	4.91221	1.88022	1.22133	0.221961	NA
C01B4.4	srd-62	0	0	0.94198	1.1915	1.16341	1.12453	1.00051	0	2.90819	0	0	0	0	0	5.12271		0.805265	1.95062	3.86541	2.22538	0.876533	0.38074	NA		0.805265	1.78487	3.44588	2.26454	0.788182	0.43059	NA		0.805265	-0.884684	0.541606	2.41284	-0.366656	0.713876	NA		0.805265	2.34075	5.06565	2.18602	1.07078	0.284269	NA
C01B4.5	srd-61	2.85983	2.76873	4.7099	5.95752	1.16341	1.12453	4.00203	1.88771	0.969398	2.0237	0.975416	2.95691	1.6688	5.10015	1.70757		3.08733	-0.599815	0.659838	0.926607	-0.647324	0.517422	NA		3.08733	-0.340057	0.79001	0.92619	-0.367157	0.713502	NA		3.08733	-0.796938	0.57557	0.953387	-0.835902	0.40321	NA		3.08733	-0.287479	0.819333	0.877621	-0.327566	0.74324	NA
C01B4.6	C01B4.6	227.833	250.109	162.962	189.449	164.041	151.812	279.142	205.76	258.829	309.626	254.584	227.682	134.338	145.354	121.238		200.836	0.2138	1.15974	0.186352	1.14729	0.251261	0.432567		200.836	-0.343942	0.787886	0.1918	-1.79323	0.0729354	0.137202		200.836	0.304608	1.23508	0.186046	1.63727	0.101574	0.192423		200.836	-0.676926	0.625497	0.190788	-3.54806	0.000388079	0.0015217
C01B4.7	C01B4.7	13.3459	23.9957	18.8396	27.4046	25.5951	19.117	16.0081	16.9894	12.6022	14.1659	12.6804	16.7558	60.9111	53.5516	64.8877		45.6748	-0.303391	0.810346	0.34354	-0.88313	0.377166	0.561549		45.6748	0.354284	1.27835	0.327498	1.08179	0.279346	0.399523		45.6748	-0.368742	0.774458	0.347885	-1.05995	0.289167	0.41706		45.6748	1.67179	3.1861	0.289031	5.78413	7.28882e-09	1.16672e-07
C01B4.8	C01B4.8	1.90655	2.76873	1.88396	0	1.16341	1.12453	3.00152	1.88771	1.9388	0	0.975416	1.97127	4.172	5.95018	4.26893		2.23847	0.0516805	1.03647	0.993329	0.0520275	0.958507	NA		2.23847	-1.50544	0.352222	1.31636	-1.14364	0.252771	NA		2.23847	-1.14671	0.451654	1.17685	-0.974388	0.329864	NA		2.23847	1.1312	2.1904	0.901255	1.25513	0.20943	NA
C01B4.9	mct-2	58.1499	71.9871	120.573	127.491	157.061	123.699	37.0188	43.4173	48.4699	50.5925	23.41	28.5835	65.9175	73.9522	81.1096		92.2702	-0.95899	0.514417	0.283467	-3.38307	0.000716792	0.00884528		92.2702	0.70322	1.62813	0.265699	2.64668	0.00812873	0.0223797		92.2702	-1.29244	0.408259	0.291258	-4.43746	9.10287e-06	0.000243693		92.2702	-0.182447	0.881207	0.269543	-0.676875	0.498485	0.602093
C01B7.1	sup-37	2663.46	4051.58	6397.93	7202.65	7386.52	6467.18	4112.09	2927.83	3845.6	3137.75	2271.74	2888.9	4267.95	4755.89	4418.34		4662.56	-0.268623	0.830111	0.230089	-1.16747	0.243019	0.423318		4662.56	0.683246	1.60575	0.229935	2.97148	0.00296368	0.00950683		4662.56	-0.660123	0.632825	0.230226	-2.86729	0.0041401	0.0179312		4662.56	0.0357633	1.0251	0.22997	0.155513	0.876417	0.911264
C01B7.10	C01B7.10	0	0	0	2.38301	3.49024	0	0	0	0	1.01185	0	0.985637	0	0	0		0.956755	0	1	2.25262	0	1	NA		0.956755	3.49726	11.2922	2.02462	1.72737	0.0841019	NA		0.956755	1.94075	3.83904	2.17326	0.893013	0.37185	NA		0.956755	0	1	2.25262	0	1	NA
C01B7.11	C01B7.11	11.4393	15.6895	46.157	54.8092	59.3342	48.3549	20.0102	16.0455	18.4186	15.1778	7.80333	11.8276	20.0256	26.3508	24.7598		29.1021	-0.429055	0.742748	0.413785	-1.0369	0.299782	0.484501		29.1021	1.14856	2.21693	0.385931	2.97608	0.0029196	0.00938136		29.1021	-1.07684	0.474066	0.439831	-2.44831	0.0143529	0.0454666		29.1021	-0.0432679	0.970454	0.398556	-0.108562	0.91355	0.939188
C01B7.14	C01B7.14	0	0	0	0	1.16341	0	0	0	0	0	0	0	0	0	0		0.123825	0	1	5.2679	0	1	NA		0.123825	1.2656	2.40428	5.2679	0.240248	0.810138	NA		0.123825	0	1	5.26765	0	1	NA		0.123825	0	1	5.2679	0	1	NA
C01B7.16	C01B7.16	0	0	0	0	0	0	1.00051	0	0	0	0	0	0.834399	0	0		0.101939	1.00963	2.01339	5.2679	0.191656	0.848012	NA		0.101939	0	1	5.2679	0	1	NA		0.101939	0	1	5.26765	0	1	NA		0.101939	0.810897	1.7543	5.2679	0.153932	0.877664	NA
C01B7.4	magu-2	680.64	763.248	811.044	918.65	1048.24	950.229	710.361	856.075	890.876	646.572	661.332	693.889	1057.18	1167.09	1030.52		879.253	0.124211	1.08991	0.120447	1.03126	0.302421	0.487455		879.253	0.371407	1.29361	0.120468	3.08305	0.00204892	0.00693363		879.253	-0.171826	0.887719	0.121307	-1.41646	0.156642	0.26593		879.253	0.529387	1.44332	0.119273	4.43845	9.06076e-06	5.96033e-05
C01B7.6	rpm-1	590.078	1003.2	2015.84	2237.65	2267.5	2059.02	1041.53	490.804	831.743	632.406	437.962	620.952	1240.75	1434.84	1271.29		1318.86	-0.610552	0.654946	0.315248	-1.93673	0.0527778	0.160482		1318.86	0.86294	1.81874	0.314474	2.74407	0.0060682	0.0174974		1318.86	-1.09358	0.468598	0.315825	-3.4626	0.000534987	0.00395136		1318.86	0.129048	1.09357	0.314599	0.410198	0.681661	0.761542
C01B7.7	C01B7.7	0	0	0	0	0	0	0	0	0	0	0.975416	0.985637	1.6688	1.70005	0.853785		0.343538	0	1	3.24078	0	1	NA		0.343538	0	1	3.24078	0	1	NA		0.343538	1.92289	3.79181	3.18812	0.603141	0.546415	NA		0.343538	3.02644	8.14795	3.0874	0.980255	0.32696	NA
C01B7.8	C01B7.8	0	0	0	0	0	1.12453	0	0	0	0	0	0	0	0.850026	0.853785		0.15713	0	1	5.2679	0	1	NA		0.15713	1.2656	2.40428	5.2679	0.240248	0.810138	NA		0.15713	0	1	5.26765	0	1	NA		0.15713	1.71605	3.28535	5.23425	0.32785	0.743025	NA
C01B7.9	C01B7.9	0	0	0	0	2.32683	0	0	0	0	0	0	0	0	0	0		0.302228	0	1	4.50561	0	1	NA		0.302228	2.16593	4.48755	4.46662	0.484914	0.627737	NA		0.302228	0	1	4.50545	0	1	NA		0.302228	0	1	4.50561	0	1	NA
C01B9.1	C01B9.1	58.1499	108.904	203.468	117.959	126.812	122.574	64.0325	44.3611	63.9802	66.7821	41.9429	77.8653	83.4399	112.203	87.9399		99.8647	-1.10514	0.464856	0.331991	-3.32884	0.000872088	0.0102393		99.8647	-0.0125575	0.991334	0.324121	-0.0387433	0.969095	0.979992		99.8647	-0.990365	0.503351	0.33097	-2.99231	0.00276876	0.0132396		99.8647	-0.386082	0.765205	0.323565	-1.19321	0.232786	0.333662
C01B9.3	C01B9.3	0	0	0.94198	1.1915	0	0	1.00051	0	0	1.01185	0	0	0.834399	0.850026	0.853785		0.430527	0.047843	1.03372	2.43427	0.0196539	0.984319	NA		0.430527	0.303824	1.23441	2.43427	0.124811	0.900673	NA		0.430527	0.0770802	1.05488	2.43425	0.0316649	0.974739	NA		0.430527	1.33003	2.51409	2.28733	0.581478	0.560918	NA
C01B9.4	C01B9.4	0.953277	1.84582	0.94198	0	0	0	1.00051	1.88771	1.9388	0	1.95083	0.985637	1.6688	1.70005	0.853785		0.932923	0.368184	1.29073	1.4081	0.261476	0.793725	NA		0.932923	-2.55072	0.170669	1.71833	-1.48442	0.137697	NA		0.932923	-0.342377	0.78874	1.50416	-0.227621	0.819941	NA		0.932923	0.172762	1.12721	1.40775	0.122722	0.902327	NA
C01B9.5	C01B9.5	15.2524	11.0749	6.59386	10.7235	5.81707	5.62266	6.00305	16.9894	9.69398	5.05925	11.705	13.7989	11.6816	10.2003	14.5143		9.00385	-0.00354708	0.997544	0.538377	-0.00658847	0.994743	NA		9.00385	-0.575092	0.671244	0.580984	-0.989857	0.322244	0.446305		9.00385	-0.103188	0.930973	0.543692	-0.189791	0.849473	NA		9.00385	0.145387	1.10603	0.525986	0.276408	0.782235	0.842984
C01B9.6	C01B9.6	0	0	0.94198	0	0	0	0	0	0	0	0	0	0	0	0		0.110217	-0.913941	0.530733	5.2679	-0.173492	0.862264	NA		0.110217	-0.657962	0.633773	5.2679	-0.1249	0.900603	NA		0.110217	-0.884652	0.541618	5.26765	-0.167941	0.86663	NA		0.110217	-1.11267	0.462437	5.2679	-0.211217	0.832718	NA
C01B9.7	C01B9.7	0.953277	1.84582	1.88396	2.38301	0	0	1.00051	1.88771	2.90819	0	1.95083	1.97127	0.834399	1.70005	0.853785		1.29498	0.308994	1.23884	1.22102	0.253061	0.800221	NA		1.29498	-1.00614	0.497877	1.47528	-0.682	0.495239	NA		1.29498	-0.249105	0.841418	1.2906	-0.193015	0.846947	NA		1.29498	-0.470136	0.721897	1.28963	-0.36455	0.715448	NA
C01B9.8	anr-12	1.90655	1.84582	3.76792	2.38301	5.81707	4.49813	2.00102	2.83156	1.9388	1.01185	1.95083	1.97127	1.6688	4.25013	3.41514		3.16805	-0.147271	0.902957	0.929748	-0.158399	0.874142	NA		3.16805	0.759868	1.69334	0.86965	0.873764	0.382247	NA		3.16805	-0.603051	0.65836	0.991675	-0.608114	0.543112	NA		3.16805	0.310088	1.23978	0.86928	0.356718	0.721303	NA
C01C10.1	clc-2	510.956	407.004	343.823	478.985	496.778	511.662	439.223	950.461	750.314	456.344	567.692	646.578	911.164	787.974	728.279		564.446	0.76261	1.69656	0.227774	3.34811	0.000813656	0.00974852		564.446	0.237501	1.17895	0.229258	1.03596	0.300222	0.422895		564.446	0.405121	1.3242	0.22841	1.77366	0.0761194	0.156442		564.446	0.944088	1.92397	0.227292	4.15363	3.27246e-05	0.000180484
C01C10.2	C01C10.2	146.805	157.818	132.819	168.002	171.022	174.302	137.07	198.209	158.012	118.386	165.821	146.86	331.256	283.059	310.778		190.887	0.17459	1.12864	0.170264	1.02541	0.305169	0.490381		190.887	0.230715	1.17342	0.17204	1.34105	0.179904	0.283727		190.887	-0.020456	0.985921	0.172272	-0.118742	0.90548	0.938156		190.887	1.08038	2.11459	0.163707	6.59945	4.1268e-11	1.23066e-09
C01C10.3	acl-12	512.863	506.678	521.857	1012.78	966.798	954.728	632.321	544.604	627.2	612.169	664.258	566.741	628.303	700.421	603.626		741.064	0.226697	1.17015	0.107617	2.10651	0.0351598	0.124352		741.064	0.928685	1.90354	0.106224	8.74275	2.27513e-18	2.24841e-16		741.064	0.258064	1.19587	0.107609	2.39817	0.0164772	0.0503479		741.064	0.32613	1.25365	0.10664	3.05824	0.00222643	0.00684355
C01C10.4	clc-5	918.959	737.406	707.427	1310.66	1287.9	1455.14	848.431	1277.98	977.153	826.682	997.851	1044.78	1490.24	1349.84	1331.05		1079.18	0.39323	1.31333	0.157727	2.4931	0.0126634	0.0652433		1079.18	0.778318	1.71513	0.15755	4.94012	7.80745e-07	7.15038e-06		1079.18	0.279817	1.21404	0.157941	1.77165	0.0764527	0.156946		1079.18	0.819465	1.76475	0.157	5.21954	1.7937e-07	1.94696e-06
C01C4.1	nlp-1	42.8975	39.6852	35.7952	17.8726	24.4317	20.2416	22.0112	60.4066	31.0207	24.2844	49.7462	45.3393	80.9367	60.3518	75.9869		40.2711	-0.0573976	0.960996	0.352062	-0.163033	0.870493	0.927973		40.2711	-0.919755	0.528599	0.38046	-2.41748	0.0156284	0.0386797		40.2711	0.0138776	1.00967	0.351334	0.0394996	0.968492	0.980221		40.2711	0.876389	1.83578	0.338057	2.59243	0.00953005	0.0236588
C01C4.2	C01C4.2	3.81311	1.84582	5.65188	4.76602	10.4707	8.99626	1.00051	2.83156	1.9388	3.03555	0.975416	1.97127	1.6688	6.8002	4.26893		4.78989	-0.958011	0.514766	0.874746	-1.09519	0.273435	NA		4.78989	1.1052	2.15129	0.718886	1.53738	0.124199	0.210896		4.78989	-0.922726	0.527511	0.873927	-1.05584	0.291042	NA		4.78989	0.17153	1.12625	0.745605	0.230055	0.818049	0.868858
C01C4.3	C01C4.3	81.0285	111.672	162.962	171.577	190.8	166.431	66.0335	73.6206	80.46	64.7584	63.402	57.167	127.663	160.655	128.068		127.324	-0.692023	0.618985	0.22476	-3.07894	0.00207739	0.0188337		127.324	0.571815	1.48639	0.21425	2.66891	0.00760975	0.0211772		127.324	-0.940914	0.520903	0.229059	-4.10773	3.99558e-05	0.000652325		127.324	0.227009	1.17041	0.213466	1.06344	0.28758	0.393519
C01C7.1	ark-1	1709.23	2310.97	3892.26	4942.36	5272.6	4741.03	2087.06	1243.06	1772.06	1555.21	1031.99	1466.63	2605.83	2864.59	2743.21		2974.44	-0.633112	0.644784	0.243429	-2.6008	0.00930055	0.0533259		2974.44	0.918515	1.89017	0.242947	3.78073	0.000156371	0.000747678		2974.44	-0.964899	0.512314	0.243661	-3.96001	7.49458e-05	0.000976238		2974.44	0.053884	1.03806	0.243056	0.221694	0.824552	0.873418
C01F1.1	gtf-2F1	2733.05	2405.11	2236.26	2630.84	2694.47	2464.97	3187.62	2344.53	2717.22	3134.71	3505.65	3010.14	1666.3	1654.15	1587.19		2479.85	0.161651	1.11857	0.12537	1.28939	0.197263	0.370598		2479.85	0.0791391	1.05639	0.125628	0.629947	0.528729	0.644623		2479.85	0.388125	1.30869	0.125245	3.09893	0.00194224	0.0101951		2479.85	-0.587462	0.665513	0.125823	-4.66896	3.02729e-06	2.32421e-05
C01F1.2	sco-1	575.779	529.751	470.99	520.688	536.334	504.915	547.278	585.189	547.71	649.608	780.333	600.253	379.652	353.611	362.005		509.862	0.0920992	1.06592	0.121458	0.75828	0.448284	0.624883		509.862	-0.0134269	0.990736	0.12286	-0.109286	0.912976	0.942359		509.862	0.365133	1.288	0.120685	3.0255	0.00248223	0.0122355		509.862	-0.525304	0.694813	0.123113	-4.26684	1.98258e-05	0.000118121
C01F1.3	rml-4	1737.82	2006.41	1935.77	2736.89	2650.26	2191.71	2435.24	1949.06	2265.48	2251.37	2182.01	2012.67	2722.64	2710.73	2762.85		2284.2	0.227217	1.17057	0.114334	1.98731	0.0468885	0.149307		2284.2	0.415882	1.33411	0.114398	3.63541	0.000277541	0.00122903		2284.2	0.182441	1.1348	0.114404	1.59471	0.110777	0.205785		2284.2	0.529011	1.44294	0.113944	4.64275	3.43809e-06	2.59045e-05
C01F1.4	C01F1.4	34.318	47.0685	48.9829	34.5536	52.3537	50.6039	40.0203	40.5857	37.8065	34.4029	48.7708	47.3106	52.5671	56.1017	52.0809		47.0401	-0.139677	0.907722	0.253891	-0.550148	0.582218	0.731632		47.0401	0.0783207	1.05579	0.254786	0.307399	0.75854	0.832873		47.0401	0.00190051	1.00132	0.25136	0.0075609	0.993967	0.996446		47.0401	0.301195	1.23216	0.241556	1.2469	0.212435	0.310968
C01F1.5	C01F1.5	303.142	251.032	307.085	357.451	411.849	436.318	186.094	240.683	245.258	240.82	317.986	257.251	463.926	514.265	554.107		345.818	-0.35681	0.780889	0.159202	-2.24124	0.0250107	0.100299		345.818	0.485984	1.40054	0.156016	3.11497	0.00183962	0.00631076		345.818	-0.0770291	0.948008	0.157689	-0.488487	0.625205	0.725872		345.818	0.831361	1.77936	0.15326	5.42451	5.81136e-08	7.1271e-07
C01F1.6	C01F1.6	1346.03	1511.73	1463.84	1899.26	1750.94	1558.6	1565.79	975.945	1448.28	1460.1	995.9	1250.77	1106.41	1042.98	1056.13		1379.87	-0.115409	0.923121	0.169621	-0.680392	0.496256	0.665752		1379.87	0.269272	1.2052	0.169493	1.58869	0.11213	0.194568		1379.87	-0.221552	0.857642	0.169767	-1.30503	0.191881	0.308748		1379.87	-0.431015	0.74174	0.169746	-2.53917	0.0111115	0.0269356
C01F1.7	C01F1.7	0	0	0.94198	0	0	0	0	0	0	0	0	0	0	0	0		0.0523322	-0.913941	0.530733	5.2679	-0.173492	0.862264	NA		0.0523322	-0.657962	0.633773	5.2679	-0.1249	0.900603	NA		0.0523322	-0.884666	0.541613	5.26765	-0.167943	0.866628	NA		0.0523322	-1.11267	0.462437	5.2679	-0.211217	0.832718	NA
C01F1.8	C01F1.8	0	0	0.94198	0	0	0	0	0	0	0	0	0	0	0	0		0.0523322	-0.913941	0.530733	5.2679	-0.173492	0.862264	NA		0.0523322	-0.657962	0.633773	5.2679	-0.1249	0.900603	NA		0.0523322	-0.884666	0.541613	5.26765	-0.167943	0.866628	NA		0.0523322	-1.11267	0.462437	5.2679	-0.211217	0.832718	NA
C01F4.2	rga-6	128.692	144.897	289.188	185.875	191.963	217.035	115.058	96.2731	93.0622	99.1613	78.0333	107.434	174.389	190.406	194.663		172.188	-0.887118	0.540693	0.251593	-3.526	0.000421883	0.00608533		172.188	0.0803639	1.05728	0.2464	0.326152	0.74431	0.821971		172.188	-0.983745	0.505665	0.252792	-3.89152	9.96193e-05	0.0012009		172.188	-0.00855669	0.994087	0.244549	-0.0349897	0.972088	0.9815
C01F4.6	C01F4.6	0	0	0	0	0	0	1.00051	0	0	0	0	0	0.834399	0.850026	0		0.149163	1.00963	2.01339	5.2679	0.191656	0.848012	NA		0.149163	0	1	5.2679	0	1	NA		0.149163	0	1	5.26765	0	1	NA		0.149163	1.7008	3.25081	5.2353	0.324871	0.745279	NA
C01F4.7	C01F4.7	0	0	0	0	0	0	1.00051	0	0.969398	0	0	0	0	0	0		0.109439	1.92459	3.79629	5.2336	0.367738	0.713069	NA		0.109439	0	1	5.2679	0	1	NA		0.109439	0	1	5.26765	0	1	NA		0.109439	0	1	5.2679	0	1	NA
C01F6.1	cpna-3	1716.85	1876.28	1521.3	1913.56	1656.7	1554.1	2351.19	1708.38	2059.97	2059.12	1687.47	1922.98	1034.65	1042.13	824.757		1641.77	0.258685	1.19639	0.148441	1.74268	0.0813887	0.210624		1641.77	0.00264644	1.00184	0.148914	0.0177716	0.985821	0.991488		1641.77	0.148577	1.10848	0.148553	1.00016	0.317233	0.444903		1641.77	-0.817735	0.567332	0.149369	-5.47459	4.38526e-08	5.57939e-07
C01F6.10	21ur-10184	19.0655	12.9208	6.59386	9.53204	9.30732	10.1208	9.00457	26.4279	20.3573	9.10665	16.5821	25.6266	15.0192	7.65023	9.39164		12.5307	0.537021	1.45097	0.511266	1.05038	0.293546	0.47831		12.5307	-0.412331	0.751408	0.555489	-0.742284	0.457915	0.579744		12.5307	0.414347	1.3327	0.515171	0.80429	0.42123	NA		12.5307	-0.264541	0.832463	0.529271	-0.499822	0.617201	0.706762
C01F6.11	21ur-14054	0	0.922911	0	0	0	0	0	0	0	0	0	0	0	0	0		0.0512728	-0.913941	0.530733	5.2679	-0.173492	0.862264	NA		0.0512728	-0.657962	0.633773	5.2679	-0.1249	0.900603	NA		0.0512728	-0.884666	0.541613	5.26765	-0.167943	0.866628	NA		0.0512728	-1.11267	0.462437	5.2679	-0.211217	0.832718	NA
C01F6.13	C01F6.13	0	0	0	0	2.32683	2.24906	0	0.943854	2.90819	1.01185	0.975416	1.97127	0	0.850026	0		0.911627	2.8983	7.45548	1.88242	1.53967	0.12364	NA		0.911627	3.14962	8.87422	1.88287	1.67278	0.0943705	NA		0.911627	2.93366	7.64047	1.88181	1.55895	0.119007	NA		0.911627	0.810906	1.75431	2.09954	0.386231	0.699326	NA
C01F6.14	C01F6.14	225.927	211.347	98.9079	108.427	118.668	82.0908	191.097	390.755	299.544	243.856	252.633	316.39	271.18	190.406	267.235		192.55	0.71759	1.64443	0.286486	2.50481	0.0122519	0.0638355		192.55	-0.794932	0.57637	0.295959	-2.68595	0.00723237	0.0202397		192.55	0.600354	1.51609	0.286912	2.09247	0.0363968	0.090353		192.55	0.442869	1.3593	0.286701	1.54471	0.122417	0.200178
C01F6.15	C01F6.15	1.90655	0	0.94198	0	0	0	0	0	2.90819	0	0	0	0	0	0		0.49139	0.0308596	1.02162	5.13396	0.00601087	0.995204	NA		0.49139	-2.15362	0.224748	5.20097	-0.41408	0.678815	NA		0.49139	-2.38023	0.192078	5.20071	-0.457675	0.647186	NA		0.49139	-2.60833	0.163989	5.20097	-0.501508	0.616014	NA
C01F6.16	C01F6.16	130.599	116.287	48.041	91.7459	74.4585	71.97	98.0498	212.367	190.002	94.1021	119.001	160.659	140.179	87.5526	105.016		103.397	0.763528	1.69764	0.331811	2.30109	0.0213865	0.0911533		103.397	-0.308887	0.807264	0.340881	-0.906145	0.364859	0.489571		103.397	0.342062	1.26757	0.334033	1.02404	0.305818	0.433257		103.397	0.17432	1.12843	0.333695	0.522391	0.601398	0.693619
C01F6.2	C01F6.2	82.9351	83.9849	59.3447	40.5112	32.5756	34.8605	114.058	94.3854	87.2458	91.0665	91.6891	102.506	46.7264	44.2013	35.859		63.9827	0.384906	1.30577	0.209314	1.83889	0.0659311	0.184617		63.9827	-1.06908	0.476621	0.24361	-4.3885	1.14134e-05	7.55765e-05		63.9827	0.33419	1.26067	0.210242	1.58955	0.111936	0.207487		63.9827	-0.835189	0.56051	0.225511	-3.70354	0.000212608	0.000909159
C01F6.3	cyp-31A1	386.077	389.469	359.836	508.773	425.81	437.443	489.248	489.86	450.77	439.143	551.11	501.689	470.601	409.712	461.898		463.227	0.332675	1.25935	0.134456	2.47423	0.0133525	0.0675381		463.227	0.272715	1.20808	0.135737	2.00915	0.0445217	0.0915645		463.227	0.394298	1.3143	0.134339	2.93511	0.00333435	0.0152495		463.227	0.241461	1.18219	0.134077	1.80091	0.0717169	0.128537
C01F6.4	fem-3	991.408	942.292	820.464	772.095	721.317	753.436	1150.58	911.763	1070.21	1064.47	948.104	1058.57	456.416	442.013	380.788		807.865	0.185465	1.13718	0.12065	1.53722	0.12424	0.276199		807.865	-0.293729	0.815791	0.122414	-2.39946	0.0164192	0.0403489		807.865	0.157101	1.11504	0.120758	1.30095	0.193274	0.31028		807.865	-1.10619	0.464521	0.123642	-8.94667	3.66377e-19	4.86537e-17
C01F6.5	aly-1	11274.4	8105.01	5536.96	5010.28	4672.27	5055.9	9250.7	13903	11798.5	11006.9	12148.8	13080.4	7258.44	6064.93	5997.84		7822.63	0.488314	1.4028	0.203921	2.39463	0.0166373	0.0775819		7822.63	-0.757499	0.591521	0.20418	-3.70995	0.000207299	0.000957001		7822.63	0.540346	1.45432	0.203918	2.64981	0.00805364	0.0294435		7822.63	-0.366894	0.77545	0.204002	-1.79848	0.072101	0.129089
C01F6.6	nrfl-1	1701.6	2095.93	2906.95	3619.79	3829.96	3703.08	2026.03	1806.54	1965.94	1920.49	2201.51	1976.2	3236.63	3576.06	3232.43		2873.35	-0.20951	0.864831	0.153916	-1.3612	0.17345	0.340291		2873.35	0.734199	1.66347	0.153486	4.7835	1.72267e-06	1.44603e-05		2873.35	-0.136727	0.90958	0.153882	-0.888522	0.37426	0.502107		2873.35	0.583276	1.49825	0.153352	3.80352	0.000142655	0.000642006
C01F6.8	icln-1	2591.96	1888.28	1526.01	994.907	860.927	982.841	2142.09	3139.26	2575.69	2501.29	2583.88	2895.8	1684.65	1437.39	1354.1		1737.54	0.387649	1.30826	0.181786	2.13244	0.0329704	0.119266		1737.54	-1.0812	0.472636	0.183411	-5.89497	3.74746e-09	6.42778e-08		1737.54	0.410156	1.32883	0.18179	2.25621	0.0240575	0.0664392		1737.54	-0.424129	0.745289	0.182161	-2.32832	0.0198949	0.0440158
C01F6.9	znf-706	9418.38	7191.32	4565.78	7449.29	6594.23	6698.84	5814.95	9874.6	8166.21	7596.97	6580.16	7946.21	6143.68	5376.41	6517.8		6619.15	0.171975	1.1266	0.218401	0.787428	0.431031	0.61021		6619.15	-0.0298144	0.979546	0.218474	-0.136467	0.891452	0.927706		6619.15	0.0631774	1.04476	0.218421	0.289246	0.772393	0.843832		6619.15	-0.231357	0.851833	0.218431	-1.05918	0.289519	0.395598
C01G10.1	C01G10.1	7.62622	6.46038	2.82594	13.1066	12.7976	11.2453	9.00457	7.55083	3.87759	4.0474	9.75416	2.95691	10.0128	2.55008	3.41514		7.4625	0.271401	1.20698	0.648442	0.418543	0.67555	NA		7.4625	1.13472	2.19575	0.621656	1.82531	0.0679538	0.129493		7.4625	-0.00897186	0.9938	0.666466	-0.0134618	0.989259	NA		7.4625	-0.0772546	0.94786	0.65675	-0.117632	0.906359	0.933658
C01G10.10	C01G10.10	525.256	491.912	384.328	371.75	381.6	386.839	535.272	531.39	499.24	574.731	726.685	575.612	307.059	277.958	285.164		430.615	0.160034	1.11731	0.13826	1.15748	0.247075	0.427792		430.615	-0.297554	0.813631	0.141215	-2.1071	0.0351091	0.0754556		430.615	0.421729	1.33953	0.137563	3.06572	0.0021715	0.0110443		430.615	-0.687439	0.620955	0.140884	-4.87945	1.0638e-06	9.23049e-06
C01G10.11	unc-76	3056.21	3205.27	3787.7	6231.57	6608.2	5940.9	3296.67	2410.6	2857.78	3166.08	2640.45	2695.72	2899.54	3243.7	3009.59		3982.46	-0.230662	0.852244	0.131879	-1.74904	0.0802839	0.208722		3982.46	0.902158	1.86886	0.131471	6.86204	6.7884e-12	2.15278e-10		3982.46	-0.241214	0.846033	0.131904	-1.82871	0.0674431	0.142929		3982.46	-0.134799	0.910797	0.131713	-1.02343	0.306107	0.412625
C01G10.12	dnj-3	286.936	224.267	113.038	88.1714	76.7854	89.9626	214.109	361.496	271.431	244.868	237.026	291.749	207.765	192.956	186.125		184.673	0.440978	1.35752	0.258253	1.70754	0.0877213	0.220781		184.673	-1.29181	0.408439	0.271618	-4.75597	1.97499e-06	1.62728e-05		184.673	0.309715	1.23946	0.258795	1.19676	0.231402	0.354653		184.673	-0.0889298	0.94022	0.259441	-0.342775	0.731768	0.802478
C01G10.13	C01G10.13	0	0	0	0	0	0	0	0.943854	0	1.01185	0	0	0	0	0		0.166535	1.00963	2.01339	5.2679	0.191656	0.848012	NA		0.166535	0	1	5.2679	0	1	NA		0.166535	1.03883	2.05457	5.26765	0.19721	0.843663	NA		0.166535	0	1	5.2679	0	1	NA
C01G10.14	C01G10.14	1.90655	0	0	2.38301	0	0	0	1.88771	0	1.01185	0	0	0	1.70005	0		0.551728	0.0031613	1.00219	2.72734	0.00115912	0.999075	NA		0.551728	0.316843	1.2456	2.71969	0.1165	0.907257	NA		0.551728	-0.834203	0.560893	2.78631	-0.299393	0.76464	NA		0.551728	-0.161345	0.894191	2.72275	-0.0592582	0.952746	NA
C01G10.15	C01G10.15	3.81311	2.76873	3.76792	0	0	2.24906	4.00203	8.49468	9.69398	2.0237	2.92625	2.95691	5.84079	4.25013	11.953		4.0044	1.10527	2.1514	0.751236	1.47127	0.141217	NA		4.0044	-2.16221	0.223413	1.23208	-1.75493	0.0792719	NA		4.0044	-0.384718	0.765929	0.856683	-0.449079	0.653375	NA		4.0044	1.0911	2.13036	0.743937	1.46666	0.142469	NA
C01G10.16	txt-12	10.486	5.53747	3.76792	7.14903	4.65366	14.6189	8.00406	18.8771	17.4492	15.1778	14.6312	17.7415	11.6816	20.4006	17.0757		11.4439	1.17026	2.25053	0.540586	2.16481	0.0304024	0.113146		11.4439	0.426812	1.34426	0.58108	0.734515	0.462635	0.58411		11.4439	1.26748	2.40741	0.538645	2.35309	0.0186182	NA		11.4439	1.31452	2.4872	0.531612	2.47271	0.0134092	0.0315605
C01G10.17	C01G10.17	0.953277	0	0	1.1915	1.16341	1.12453	1.00051	0	0	0	0	0	0.834399	1.70005	3.41514		0.632379	0.047843	1.03372	2.26764	0.0210982	0.983167	NA		0.632379	1.78483	3.44577	2.10912	0.846242	0.397418	NA		0.632379	-0.884696	0.541602	2.26762	-0.390144	0.69643	NA		0.632379	2.55772	5.88775	2.01267	1.27081	0.203798	NA
C01G10.18	C01G10.18	1.90655	0	0	0	0	0	0	0	0.969398	0	0	0	0.834399	0.850026	0		0.253354	-0.866693	0.548403	4.07764	-0.212548	0.83168	NA		0.253354	-1.5725	0.336225	4.07764	-0.38564	0.699763	NA		0.253354	-1.79919	0.287335	4.07752	-0.441247	0.659034	NA		0.253354	-0.175189	0.885652	4.0354	-0.043413	0.965372	NA
C01G10.19	C01G10.19	0	0	0	1.1915	0	1.12453	1.00051	0	0.969398	0	0	0	0	0.850026	0		0.285332	1.9224	3.79054	3.41553	0.562841	0.573543	NA		0.285332	2.15992	4.46889	3.41747	0.632022	0.527373	NA		0.285332	0	1	3.46758	0	1	NA		0.285332	0.810903	1.75431	3.46765	0.233848	0.815103	NA
C01G10.2	srx-79	0.953277	2.76873	0	0	1.16341	1.12453	0	0	0	0	0.975416	0.985637	0	0	0		0.442834	-2.79849	0.143737	2.69241	-1.0394	0.298619	NA		0.442834	-0.698792	0.616088	2.62916	-0.265786	0.790404	NA		0.442834	-0.922403	0.52763	2.62867	-0.3509	0.725663	NA		0.442834	-2.99722	0.125241	2.69241	-1.11321	0.265618	NA
C01G10.3	srx-78	4.76638	1.84582	0	2.38301	2.32683	1.12453	2.00102	2.83156	4.84699	9.10665	4.87708	7.8851	3.3376	5.95018	4.26893		3.25651	0.557165	1.47138	0.932573	0.597449	0.550207	NA		3.25651	-0.182052	0.881448	1.03766	-0.175446	0.860729	NA		3.25651	1.72915	3.31532	0.86928	1.98917	0.0466821	NA		3.25651	1.04	2.05623	0.889499	1.1692	0.242323	NA
C01G10.4	C01G10.4	0	1.84582	0.94198	3.57451	1.16341	2.24906	1.00051	5.66312	3.87759	4.0474	3.90166	3.94255	13.3504	3.4001	7.68407		3.43813	1.91613	3.77409	1.12284	1.7065	0.0879143	NA		3.43813	1.30909	2.47786	1.19026	1.09984	0.271401	NA		3.43813	2.08046	4.22942	1.11523	1.8655	0.0621116	NA		3.43813	3.12122	8.70122	1.06878	2.92037	0.00349618	NA
C01G10.5	C01G10.5	5.71966	6.46038	2.82594	5.95752	3.49024	2.24906	5.00254	6.60698	10.6634	3.03555	7.80333	21.684	10.0128	14.4504	22.1984		7.40874	0.570123	1.48465	0.736905	0.773671	0.439125	NA		7.40874	-0.367652	0.775043	0.812239	-0.452641	0.650808	0.748228		7.40874	1.11718	2.16923	0.718112	1.55572	0.119775	NA		7.40874	1.63501	3.1059	0.70009	2.33543	0.0195209	0.0432954
C01G10.6	C01G10.6	2.85983	0.922911	1.88396	4.76602	5.81707	2.24906	3.00152	0.943854	0.969398	3.03555	3.90166	2.95691	3.3376	3.4001	7.68407		3.00017	-0.212982	0.862752	1.04068	-0.204657	0.83784	NA		3.00017	1.17974	2.26536	0.925651	1.2745	0.202488	NA		3.00017	0.810605	1.75395	0.936164	0.865879	0.386556	NA		3.00017	1.3514	2.55159	0.889029	1.52008	0.12849	NA
C01G10.7	C01G10.7	507.143	405.158	223.249	189.449	129.139	173.178	486.247	547.435	520.567	439.143	585.25	533.23	267.842	248.207	230.522		331.022	0.452996	1.36888	0.226092	2.00359	0.0451142	0.145327		331.022	-1.20741	0.433044	0.233936	-5.16129	2.45249e-07	2.55438e-06		331.022	0.456174	1.3719	0.226144	2.01718	0.0436767	0.10306		331.022	-0.604879	0.657526	0.22842	-2.6481	0.00809459	0.0206007
C01G10.8	ahsa-1	8697.7	6696.64	3912.04	3487.54	3231.97	3607.5	7693.91	9801.92	8792.44	9189.62	11020.3	10026.9	4816.15	4345.33	4507.99		6017.66	0.445362	1.36166	0.202801	2.19606	0.028088	0.107553		6017.66	-0.902642	0.534906	0.203187	-4.44242	8.89532e-06	6.06266e-05		6017.66	0.647239	1.56617	0.202779	3.19184	0.0014137	0.00815081		6017.66	-0.498109	0.708034	0.202929	-2.4546	0.014104	0.0328996
C01G10.9	C01G10.9	1081.97	881.38	626.416	627.923	566.583	621.866	1156.59	1277.03	1168.12	1301.24	1563.59	1232.05	687.545	691.071	689.005		869.78	0.476003	1.39088	0.163477	2.91175	0.00359415	0.0276921		869.78	-0.511691	0.7014	0.165808	-3.08604	0.00202844	0.00687252		869.78	0.661824	1.58208	0.1633	4.05281	5.0606e-05	0.000748607		869.78	-0.324781	0.79842	0.164363	-1.976	0.0481547	0.0923124
C01G12.1	madf-5	924.679	928.449	1301.82	1894.49	1995.26	1668.81	787.4	754.139	839.498	769.006	642.799	789.495	1327.53	1384.69	1496.69		1241.02	-0.406038	0.754693	0.142989	-2.83964	0.00451638	0.0324057		1241.02	0.817042	1.76179	0.141532	5.77286	7.79393e-09	1.23124e-07		1241.02	-0.519341	0.697691	0.143297	-3.62423	0.000289818	0.00252926		1241.02	0.415833	1.33407	0.141475	2.93926	0.00329	0.00951727
C01G12.10	nspb-8	9.53277	18.4582	11.3038	8.34053	3.49024	5.62266	17.0086	31.1472	14.541	15.1778	22.4346	26.6122	15.8536	14.4504	9.39164		13.0464	0.67467	1.59623	0.455959	1.47967	0.138961	0.297082		13.0464	-1.17707	0.44225	0.560671	-2.09939	0.0357824	0.0765696		13.0464	0.707651	1.63314	0.455866	1.55232	0.120585	NA		13.0464	0.0131699	1.00917	0.469106	0.0280744	0.977603	0.985137
C01G12.11	nspb-9	11.4393	7.38329	4.7099	2.38301	1.16341	2.24906	9.00457	15.1017	9.69398	10.1185	6.82791	10.842	7.50959	8.50026	5.9765		6.50584	0.527126	1.44106	0.553124	0.952998	0.340591	NA		6.50584	-2.01999	0.246561	0.814005	-2.48154	0.0130816	0.0333825		6.50584	0.240262	1.18121	0.566179	0.424358	0.671305	NA		6.50584	-0.0961252	0.935542	0.571275	-0.168264	0.866375	0.903586
C01G12.12	C01G12.12	61.0097	43.3768	48.9829	47.6602	57.0073	57.3511	59.03	68.9013	63.0108	74.8769	74.1316	82.7935	43.3888	39.1012	38.4203		53.6993	0.318247	1.24681	0.22909	1.38918	0.164778	0.328952		53.6993	0.081554	1.05816	0.2383	0.342232	0.732176	0.812531		53.6993	0.597167	1.51274	0.22539	2.64948	0.00806163	0.0294651		53.6993	-0.34147	0.789237	0.237621	-1.43704	0.150708	0.2363
C01G12.13	C01G12.13	1.90655	1.84582	4.7099	3.57451	0	3.3736	1.00051	4.71927	0.969398	3.03555	0	1.97127	2.5032	1.70005	0.853785		2.25046	-0.326892	0.797252	1.04736	-0.312112	0.754955	NA		2.25046	-0.283045	0.821854	1.06977	-0.264584	0.79133	NA		2.25046	-0.765603	0.588208	1.1008	-0.695496	0.486745	NA		2.25046	-0.739103	0.599112	1.06993	-0.690796	0.489694	NA
C01G12.14	C01G12.14	0.953277	0	1.88396	2.38301	1.16341	4.49813	1.00051	0	0	0	0	0	0	1.70005	2.56136		1.53013	-1.4379	0.369104	1.85148	-0.776621	0.437382	NA		1.53013	1.51231	2.85267	1.52959	0.9887	0.32281	NA		1.53013	-2.37043	0.193388	1.85147	-1.2803	0.20044	NA		1.53013	0.587807	1.50296	1.56678	0.375169	0.707535	NA
C01G12.15	C01G12.15	0	0	0	0	0	0	0	0.943854	0	0	0.975416	0.985637	0	0	0		0.161384	1.00963	2.01339	5.2679	0.191656	0.848012	NA		0.161384	0	1	5.2679	0	1	NA		0.161384	1.92074	3.78617	5.23561	0.366861	0.713723	NA		0.161384	0	1	5.2679	0	1	NA
C01G12.16	C01G12.16	15.2524	11.0749	3.76792	5.95752	10.4707	12.3699	16.0081	17.9332	14.541	21.2489	15.6067	15.7702	9.17839	6.8002	11.953		11.6599	0.689614	1.61285	0.470489	1.46574	0.14272	0.301724		11.6599	-0.0571557	0.961157	0.51301	-0.111412	0.911289	0.941189		11.6599	0.805961	1.74831	0.467886	1.72256	0.0849687	NA		11.6599	-0.10698	0.928529	0.492699	-0.217131	0.828106	0.875872
C01G12.2	nspb-7	8.57949	11.9978	4.7099	7.14903	1.16341	3.3736	4.00203	18.8771	9.69398	20.237	13.6558	20.6984	10.0128	3.4001	8.53785		8.52235	0.369793	1.29217	0.638239	0.579396	0.562322	NA		8.52235	-1.12225	0.459375	0.743696	-1.50902	0.131292	0.220765		8.52235	1.10819	2.15575	0.619153	1.78985	0.0734782	NA		8.52235	-0.204524	0.867825	0.652469	-0.313462	0.75393	0.820599
C01G12.3	C01G12.3	677.78	565.745	279.768	228.769	202.434	247.397	423.215	707.89	558.373	530.209	509.167	587.44	264.505	232.057	197.224		372.526	0.149685	1.10933	0.251847	0.59435	0.552278	0.709852		372.526	-1.16638	0.445537	0.25649	-4.54747	5.42957e-06	3.94225e-05		372.526	0.0948905	1.06798	0.251989	0.376566	0.706496	0.791447		372.526	-1.13447	0.455501	0.254497	-4.45772	8.28362e-06	5.5261e-05
C01G12.4	wee-1.2	94.3744	170.739	194.048	133.449	117.505	110.204	145.074	109.487	135.716	156.837	125.829	159.673	89.2807	104.553	75.1331		135.979	-0.235701	0.849272	0.237319	-0.993181	0.320622	0.504812		135.979	-0.347468	0.785962	0.240468	-1.44497	0.148468	0.243898		135.979	-0.054617	0.96285	0.236225	-0.231207	0.817154	0.876332		135.979	-0.772017	0.585598	0.240178	-3.21435	0.00130741	0.00433119
C01G12.5	C01G12.5	2.85983	3.69164	1.88396	3.57451	0	3.3736	0	0.943854	2.90819	2.0237	0.975416	3.94255	374.645	318.76	405.548		62.9123	-1.12257	0.459275	0.89612	-1.2527	0.210314	0.38696		62.9123	-0.281235	0.822886	0.793365	-0.354484	0.722976	0.804948		62.9123	-0.285122	0.820672	0.761452	-0.374445	0.708073	0.792772		62.9123	7.02275	130.035	0.533004	13.1758	1.20933e-39	6.04593e-37
C01G12.6	nspb-10	11.4393	11.0749	11.3038	1.1915	4.65366	3.3736	2.00102	8.49468	2.90819	5.05925	4.87708	7.8851	22.5288	16.1505	26.4673		9.02128	-1.32134	0.400162	0.585405	-2.25714	0.0239991	NA		9.02128	-1.86824	0.273907	0.673703	-2.77309	0.00555265	0.0162005		9.02128	-0.92345	0.527247	0.555907	-1.66116	0.0966814	NA		9.02128	0.945979	1.9265	0.469462	2.01503	0.0439019	0.0855491
C01G12.7	C01G12.7	30.5049	8.3062	19.7816	26.2131	20.9415	26.9888	16.0081	3.77542	14.541	20.237	10.7296	17.7415	39.2168	35.7011	36.7128		25.7305	-0.775654	0.584124	0.457164	-1.69666	0.0897604	0.224291		25.7305	0.343125	1.2685	0.42704	0.803496	0.421688	0.546122		25.7305	-0.265348	0.831998	0.438427	-0.605227	0.545028	0.657537		25.7305	0.93329	1.90963	0.406929	2.2935	0.0218195	0.0474827
C01G12.8	catp-4	1.90655	0.922911	11.3038	17.8726	22.1049	23.6152	8.00406	4.71927	2.90819	6.0711	5.8525	5.91382	3.3376	6.8002	2.56136		9.03746	0.142795	1.10404	0.69617	0.205116	0.837482	NA		9.03746	2.17325	4.51039	0.626769	3.46739	0.000525542	0.00213814		9.03746	0.338171	1.26415	0.68596	0.49299	0.62202	NA		9.03746	-0.152416	0.899743	0.702587	-0.216935	0.828259	0.87598
C01G12.9	C01G12.9	0	3.69164	0.94198	2.38301	0	0	5.00254	5.66312	0.969398	3.03555	0.975416	1.97127	0	1.70005	0.853785		1.6262	1.32023	2.49706	1.30054	1.01514	0.310039	NA		1.6262	-0.993571	0.502233	1.59645	-0.622362	0.533704	NA		1.6262	0.356622	1.28042	1.36503	0.261256	0.793895	NA		1.6262	-0.872839	0.546071	1.48648	-0.587186	0.557079	NA
C01G5.12	21ur-14426	0	0	0	1.1915	1.16341	1.12453	0	0	0	0	0	0	0.834399	0	0		0.239658	0	1	4.11038	0	1	NA		0.239658	2.74683	6.71242	4.02511	0.682424	0.494971	NA		0.239658	0	1	4.11026	0	1	NA		0.239658	0.810901	1.75431	4.11038	0.197281	0.843608	NA
C01G5.16	21ur-9294	0	0.922911	0	0	0	0	1.00051	0	0	0	0.975416	0	0	0	0		0.161046	0.0478425	1.03372	5.2679	0.00908188	0.992754	NA		0.161046	-0.657962	0.633773	5.2679	-0.1249	0.900603	NA		0.161046	0.0770509	1.05486	5.26765	0.0146272	0.98833	NA		0.161046	-1.11267	0.462437	5.2679	-0.211217	0.832718	NA
C01G5.17	21ur-6629	0	0	0	0	0	0	0	0	0	1.01185	0	0.985637	0	0	0		0.110972	0	1	5.2679	0	1	NA		0.110972	0	1	5.2679	0	1	NA		0.110972	1.94522	3.85097	5.23392	0.371657	0.710148	NA		0.110972	0	1	5.2679	0	1	NA
C01G5.18	21ur-6826	0	0	0	0	0	0	0	0	0	0	0	0	0	0	0.853785		0.0474325	0	1	5.2679	0	1	NA		0.0474325	0	1	5.2679	0	1	NA		0.0474325	0	1	5.26765	0	1	NA		0.0474325	0.810897	1.7543	5.2679	0.153932	0.877664	NA
C01G5.19	21ur-7693	0	0	0.94198	0	0	0	0	0	0	0	0	0	0	0	0		0.0523322	-0.913941	0.530733	5.2679	-0.173492	0.862264	NA		0.0523322	-0.657962	0.633773	5.2679	-0.1249	0.900603	NA		0.0523322	-0.884666	0.541613	5.26765	-0.167943	0.866628	NA		0.0523322	-1.11267	0.462437	5.2679	-0.211217	0.832718	NA
C01G5.2	prg-2	171.59	207.655	248.683	215.662	190.8	182.174	230.117	119.869	156.073	205.406	140.46	138.975	136.841	126.654	114.407		182.299	-0.312876	0.805036	0.223215	-1.40168	0.161011	0.32402		182.299	-0.0937151	0.937106	0.223446	-0.419408	0.674918	0.767889		182.299	-0.373891	0.771699	0.223791	-1.67071	0.0947783	0.183302		182.299	-0.732534	0.601846	0.22469	-3.26019	0.00111336	0.00377441
C01G5.20	21ur-12029	0	0	0.94198	0	0	0	0	0	0	0	0	0	0	0	0		0.0523322	-0.913941	0.530733	5.2679	-0.173492	0.862264	NA		0.0523322	-0.657962	0.633773	5.2679	-0.1249	0.900603	NA		0.0523322	-0.884666	0.541613	5.26765	-0.167943	0.866628	NA		0.0523322	-1.11267	0.462437	5.2679	-0.211217	0.832718	NA
C01G5.21	21ur-9318	0	0	0	0	0	0	1.00051	0	0	0	0	0	0	0.850026	0		0.102807	1.00963	2.01339	5.2679	0.191656	0.848012	NA		0.102807	0	1	5.2679	0	1	NA		0.102807	0	1	5.26765	0	1	NA		0.102807	0.810897	1.7543	5.2679	0.153932	0.877664	NA
C01G5.22	21ur-6712	0	0	0	0	0	1.12453	0	0	0	0	0.975416	0	0	0.850026	0		0.163887	0	1	5.2679	0	1	NA		0.163887	1.2656	2.40428	5.2679	0.240248	0.810138	NA		0.163887	1.03883	2.05457	5.26765	0.19721	0.843663	NA		0.163887	0.810897	1.7543	5.2679	0.153932	0.877664	NA
C01G5.23	21ur-8881	0	0	0.94198	0	1.16341	1.12453	0	0	0	0	0	0	0	0	0.853785		0.284063	-0.913948	0.530731	3.46129	-0.264049	0.791743	NA		0.284063	1.1839	2.2719	3.41252	0.346927	0.728646	NA		0.284063	-0.884677	0.541609	3.46122	-0.255597	0.798262	NA		0.284063	-0.150888	0.900696	3.46129	-0.0435929	0.965229	NA
C01G5.24	21ur-12103	0	0	0	0	1.16341	0	0	0	0	2.0237	0	0	0	0.850026	0		0.338667	0	1	3.82321	0	1	NA		0.338667	1.26561	2.40429	3.82321	0.331034	0.740619	NA		0.338667	1.96053	3.89206	3.77506	0.519339	0.603524	NA		0.338667	0.810902	1.75431	3.82321	0.2121	0.832029	NA
C01G5.25	C01G5.25	116.3	111.672	161.079	72.6818	91.9098	74.2191	97.0493	169.894	87.2458	99.1613	98.517	126.162	228.625	204.856	250.159		128.733	-0.133743	0.911464	0.244517	-0.546967	0.584401	0.733389		128.733	-0.703988	0.613873	0.253367	-2.77853	0.00546059	0.015984		128.733	-0.264424	0.832531	0.245879	-1.07543	0.282184	0.409973		128.733	0.813393	1.75734	0.238042	3.41702	0.000633112	0.00231284
C01G5.3	C01G5.3	0	0	1.88396	0	0	0	0	0	0	0	0	0.985637	0	0	0		0.331688	-1.81338	0.284524	3.77266	-0.480662	0.630757	NA		0.331688	-1.5574	0.339764	3.77266	-0.412811	0.679745	NA		0.331688	-0.822352	0.565519	3.77257	-0.217982	0.827443	NA		0.331688	-2.01211	0.247911	3.77266	-0.533339	0.593799	NA
C01G5.4	C01G5.4	1.90655	0	0	0	0	1.12453	1.00051	0.943854	0	3.03555	0	0	0	2.55008	1.70757		0.681591	0.0350099	1.02456	2.41641	0.0144884	0.98844	NA		0.681591	-0.605854	0.657082	2.48727	-0.243582	0.807555	NA		0.681591	0.67044	1.59156	2.34139	0.286343	0.774616	NA		0.681591	1.16496	2.24227	2.28321	0.51023	0.609891	NA
C01G5.5	C01G5.5	583.406	604.507	436.137	269.28	251.298	249.646	662.336	649.371	649.496	652.643	703.275	683.047	316.237	266.058	242.475		448.208	0.272027	1.2075	0.138519	1.96383	0.0495499	0.15452		448.208	-1.07661	0.474143	0.145914	-7.37833	1.60286e-13	7.30439e-12		448.208	0.328228	1.25547	0.138449	2.37074	0.0177524	0.0532722		448.208	-0.977297	0.50793	0.142448	-6.86074	6.85025e-12	2.48274e-10
C01G5.6	ddi-1	3843.61	3420.31	2336.11	3651.96	3316.9	3418.58	4418.24	4169	4304.13	4502.73	5707.16	4058.85	2075.99	2078.31	1864.67		3463.77	0.425293	1.34284	0.163114	2.60733	0.00912521	0.0527373		3463.77	0.113721	1.08202	0.163346	0.696199	0.486304	0.606674		3463.77	0.571773	1.48635	0.163077	3.50616	0.000454623	0.00351023		3463.77	-0.673506	0.626981	0.16353	-4.11855	3.81266e-05	0.000206131
C01G5.7	C01G5.7	63.8696	55.3747	63.1126	66.7243	76.7854	76.4682	78.0396	114.206	90.154	72.8532	82.9104	92.6499	115.981	116.454	101.6		79.1131	0.633537	1.55136	0.203811	3.10846	0.00188067	0.0175299		79.1131	0.271982	1.20747	0.21297	1.27709	0.201572	0.30946		79.1131	0.447162	1.36336	0.206616	2.16421	0.030448	0.0791346		79.1131	0.873963	1.83269	0.199155	4.38835	1.14216e-05	7.31517e-05
C01G5.8	fan-1	774.061	842.618	807.277	587.412	540.988	546.523	1035.53	616.337	849.192	900.547	619.389	766.826	453.913	444.563	433.723		650.103	0.0447476	1.0315	0.170852	0.261908	0.793392	0.878281		650.103	-0.533395	0.690927	0.172694	-3.08867	0.00201055	0.00681869		650.103	-0.0842926	0.943247	0.171126	-0.492577	0.622312	0.723288		650.103	-0.863568	0.549592	0.172348	-5.01061	5.42581e-07	5.13233e-06
C01G5.9	C01G5.9	228.786	242.726	177.092	268.089	294.344	302.499	314.159	556.874	420.719	310.638	455.519	335.117	461.423	480.264	434.577		322.394	0.994396	1.99225	0.207032	4.8031	1.5623e-06	0.000109218		322.394	0.415335	1.33361	0.209973	1.97804	0.0479238	0.0972203		322.394	0.763926	1.69811	0.207775	3.67669	0.000236277	0.00218393		322.394	1.08524	2.12173	0.206343	5.25938	1.44538e-07	1.60789e-06
C01G6.1	aqp-2	29372.4	33420.5	42289.2	118325	123711	114281	35277.9	24023.9	29838.1	34089.2	37276.5	25949.9	41258.5	46252.4	48057		58885.9	-0.237382	0.848283	0.172022	-1.37995	0.167601	0.332888		58885.9	1.76164	3.39083	0.171976	10.2435	1.26542e-24	2.83022e-22		58885.9	-0.110774	0.926091	0.172018	-0.643969	0.519595	0.635126		58885.9	0.367499	1.29011	0.171994	2.1367	0.0326228	0.0666974
C01G6.10	C01G6.10	4.76638	4.61456	0	3.57451	5.81707	1.12453	4.00203	5.66312	1.9388	0	0.975416	1.97127	5.0064	3.4001	1.70757		3.05564	0.30837	1.23831	0.912185	0.338056	0.735321	NA		3.05564	0.158251	1.11593	0.942657	0.167877	0.86668	NA		3.05564	-1.66199	0.316003	1.16338	-1.42859	0.153123	NA		3.05564	0.110096	1.0793	0.912152	0.120699	0.903929	NA
C01G6.11	21ur-8602	1.90655	0.922911	0	2.38301	1.16341	0	0	0	0.969398	0	0	0	1.6688	1.70005	0		0.826686	-1.43619	0.369541	1.93462	-0.742365	0.457866	NA		0.826686	0.31588	1.24477	1.74405	0.181119	0.856274	NA		0.826686	-2.36873	0.193616	1.9346	-1.2244	0.220801	NA		0.826686	0.256976	1.19497	1.69617	0.151504	0.879578	NA
C01G6.12	21ur-15523	40.9909	76.6016	122.457	109.618	96.5634	101.208	72.0366	34.9226	57.1945	63.7466	39.9921	54.2101	56.7391	56.9517	48.6658		73.9324	-0.550898	0.682595	0.31847	-1.72983	0.0836611	0.213997		73.9324	0.35617	1.28002	0.311359	1.14392	0.252656	0.37026		73.9324	-0.605224	0.657369	0.31962	-1.89357	0.0582817	0.12813		73.9324	-0.564433	0.676221	0.316127	-1.78546	0.074186	0.132126
C01G6.13	C01G6.13	0	0	4.7099	8.34053	4.65366	3.3736	0	0	1.9388	4.0474	0	0	4.172	3.4001	1.70757		3.12195	-1.27674	0.412727	1.47678	-0.864541	0.387291	NA		3.12195	1.79572	3.47188	1.13474	1.58249	0.113538	NA		3.12195	-0.234372	0.850055	1.28673	-0.182145	0.855469	NA		3.12195	0.98197	1.97516	1.15299	0.851672	0.394396	NA
C01G6.2	C01G6.2	105.814	84.9078	49.9249	58.3837	50.0268	47.2303	68.0345	134.027	115.358	110.292	99.4924	119.262	80.9367	52.7016	54.6423		75.8216	0.40119	1.3206	0.281233	1.42654	0.153713	0.315882		75.8216	-0.629382	0.646453	0.297066	-2.11866	0.0341189	0.0736916		75.8216	0.451542	1.3675	0.281068	1.60653	0.108158	0.202127		75.8216	-0.353136	0.78288	0.286495	-1.23261	0.217721	0.316742
C01G6.3	C01G6.3	25012.1	21969.9	16965.1	23041.3	18896.2	21639.4	30055.3	24307.1	27107.3	32665.6	42808.1	28793.4	12063.7	11721	10068.7		22820	0.34938	1.27401	0.166787	2.09477	0.0361913	0.126533		22820	-0.00837574	0.994211	0.166826	-0.0502064	0.959958	0.974171		22820	0.705338	1.63053	0.166772	4.22936	2.34355e-05	0.000450397		22820	-0.917571	0.5294	0.166868	-5.49877	3.82455e-08	4.955e-07
C01G6.4	C01G6.4	2362.22	1946.42	1893.38	2933.49	2535.08	2949.65	2411.22	2488	2502.02	2429.45	2569.25	2408.9	1833.17	1642.25	1615.36		2344.54	0.255127	1.19344	0.10719	2.38013	0.0173063	0.0795381		2344.54	0.440867	1.35742	0.107254	4.11051	3.94779e-05	0.000223756		2344.54	0.256363	1.19446	0.107215	2.39112	0.0167971	0.051048		2344.54	-0.284724	0.820898	0.107529	-2.64789	0.00809967	0.0206105
C01G6.5	C01G6.5	3734.94	5051.09	8265.87	10771.2	10544	9379.72	5058.57	2676.77	4026.88	3820.75	2161.52	3282.17	3484.45	3662.76	3361.35		6095.76	-0.535819	0.689767	0.261323	-2.05041	0.0403245	0.135362		6095.76	0.848061	1.80008	0.261144	3.24748	0.00116432	0.00424975		6095.76	-0.88019	0.543296	0.26142	-3.36696	0.000760025	0.00508176		6095.76	-0.69837	0.616268	0.261315	-2.67253	0.00752825	0.019379
C01G6.6	mtrr-1	1233.54	1253.31	1197.26	1134.31	1080.81	982.841	1360.69	1046.73	1176.85	1254.69	1096.37	1136.44	874.45	836.425	864.031		1088.67	-0.0399998	0.972655	0.109343	-0.365818	0.714501	0.827934		1088.67	-0.204422	0.867886	0.110213	-1.8548	0.063625	0.122939		1088.67	-0.0792646	0.94654	0.109468	-0.724087	0.469012	0.591437		1088.67	-0.516795	0.698923	0.10989	-4.70285	2.56557e-06	2.01255e-05
C01G6.7	acs-7	593.892	619.273	576.492	837.628	823.698	916.493	812.412	703.171	718.324	847.93	925.67	740.214	619.124	707.221	604.48		790.003	0.319542	1.24793	0.117004	2.73102	0.00631384	0.0407663		790.003	0.526595	1.44052	0.117138	4.49552	6.94018e-06	4.87073e-05		790.003	0.490178	1.40462	0.116642	4.2024	2.64102e-05	0.000485759		790.003	0.109444	1.07881	0.117034	0.935145	0.349713	0.4591
C01G6.8	cam-1	5508.03	7183.02	9481.02	13779.8	13118.7	11504	7733.93	4702.28	7159.97	6608.39	4224.53	5613.2	6373.14	6518.85	6400.83		8183.03	-0.178207	0.883801	0.208534	-0.854571	0.392789	0.576585		8183.03	0.79244	1.732	0.208437	3.80182	0.000143639	0.000694616		8183.03	-0.431023	0.741736	0.208587	-2.06639	0.0387914	0.0947096		8183.03	-0.200685	0.870137	0.208505	-0.962496	0.335801	0.444709
C01G6.9	C01G6.9	859.856	673.725	620.765	487.326	565.42	717.451	556.282	1209.08	777.457	592.944	914.94	866.375	1623.74	1570.85	1569.26		882.521	0.239535	1.18061	0.237596	1.00816	0.313376	0.49842		882.521	-0.283023	0.821867	0.238789	-1.18524	0.235922	0.350376		882.521	0.140406	1.10221	0.237751	0.590558	0.554817	0.665742		882.521	1.14494	2.21136	0.236699	4.83709	1.31751e-06	1.11307e-05
C01G8.1	C01G8.1	1168.72	1091.8	843.072	1694.32	1367.01	1407.91	1194.61	712.61	948.071	1163.63	1659.18	814.136	371.308	393.562	332.122		1114.96	-0.120492	0.919874	0.227769	-0.529012	0.596797	0.742728		1114.96	0.526045	1.43998	0.2274	2.31331	0.0207059	0.0490124		1114.96	0.228844	1.1719	0.227459	1.00609	0.314372	0.441772		1114.96	-1.50036	0.353465	0.22973	-6.53098	6.53386e-11	1.85723e-09
C01G8.10	C01G8.10	0	0	0	0	0	0	0	0	0.969398	0	0	0	0	0	0		0.0538554	1.00963	2.01339	5.2679	0.191656	0.848012	NA		0.0538554	0	1	5.2679	0	1	NA		0.0538554	0	1	5.26765	0	1	NA		0.0538554	0	1	5.2679	0	1	NA
C01G8.2	cln-3.2	483.311	491.912	407.877	389.622	358.332	362.099	589.299	538.941	550.618	528.186	706.201	497.747	410.524	437.763	381.642		462.933	0.279367	1.21366	0.142028	1.96699	0.0491848	0.153822		462.933	-0.31752	0.802448	0.145405	-2.1837	0.0289843	0.06444		462.933	0.324854	1.25254	0.14198	2.28803	0.0221359	0.0626574		462.933	-0.16936	0.889237	0.142827	-1.18577	0.235713	0.336983
C01G8.3	dhs-1	1631.06	1245.93	915.604	876.948	824.861	828.78	1622.82	1726.31	1695.48	1462.12	1957.66	1743.59	811.036	793.924	671.075		1176.45	0.411645	1.3302	0.172104	2.39184	0.0167643	0.0780355		1176.45	-0.583694	0.667253	0.173704	-3.36028	0.000778639	0.00301213		1176.45	0.445264	1.36156	0.172101	2.58723	0.00967509	0.0337224		1176.45	-0.736554	0.600171	0.173184	-4.253	2.10923e-05	0.000124705
C01G8.4	dnj-4	461.386	415.31	283.536	224.003	222.212	224.906	494.251	667.305	529.291	437.119	585.25	606.167	367.97	323.01	292.848		372.938	0.543646	1.45765	0.191903	2.83291	0.0046126	0.0329264		372.938	-0.789719	0.578457	0.198061	-3.98725	6.68438e-05	0.00035297		372.938	0.489396	1.40386	0.192088	2.54776	0.0108415	0.036725		372.938	-0.237774	0.848053	0.193446	-1.22915	0.219015	0.318109
C01G8.5	erm-1	5496.6	6442.84	8209.35	13464	13929.6	12754.4	6844.47	4235.07	5697.15	6377.69	4532.76	5574.76	6603.44	7334.02	6942.98		8344.4	-0.264287	0.83261	0.179514	-1.47223	0.140957	0.299692		8344.4	0.994628	1.99257	0.179346	5.54586	2.92513e-08	3.98408e-07		8344.4	-0.289547	0.818159	0.179527	-1.61283	0.106781	0.199973		8344.4	0.0514524	1.03631	0.179414	0.286781	0.77428	0.83697
C01G8.6	hpo-32	211.627	190.12	170.498	190.641	175.676	181.05	222.113	143.466	186.124	239.808	295.551	188.257	94.2871	117.304	90.5012		179.105	-0.0537378	0.963437	0.198064	-0.271315	0.786148	0.873922		179.105	-0.0641507	0.956508	0.199932	-0.320862	0.748315	0.824744		179.105	0.338887	1.26478	0.195991	1.72909	0.0837931	0.167586		179.105	-0.921624	0.527914	0.203451	-4.52996	5.89951e-06	4.12166e-05
C01G8.9	let-526	6920.79	11796.7	23427	30336.9	29557.7	26802.1	12850.5	5788.66	10666.3	9320.15	5165.8	7689.94	9366.97	10944.9	9449.7		15999.6	-0.524188	0.69535	0.327152	-1.60228	0.109095	0.253252		15999.6	1.04063	2.05713	0.327089	3.18149	0.00146519	0.00519077		15999.6	-0.926361	0.526184	0.327189	-2.83127	0.00463632	0.0194705		15999.6	-0.501893	0.706179	0.327137	-1.5342	0.124981	0.203547
C01H6.1	col-61	24.7852	16.6124	32.0273	11.915	13.961	14.6189	9.00457	29.2595	14.541	22.2607	14.6312	22.6697	27.5352	27.2008	22.1984		21.0294	-0.467116	0.723409	0.393372	-1.18747	0.235044	0.414881		21.0294	-0.855789	0.552563	0.419751	-2.0388	0.0414697	0.086332		21.0294	-0.301927	0.811168	0.388994	-0.776174	0.437646	0.562522		21.0294	0.0688774	1.0489	0.373556	0.184383	0.853713	0.894441
C01H6.11	C01H6.11	14.2992	7.38329	7.53584	3.57451	5.81707	3.3736	12.0061	13.214	12.6022	16.1896	11.705	12.8133	16.688	17.0005	16.2219		10.3413	0.376041	1.29778	0.464015	0.810408	0.417706	NA		10.3413	-1.19297	0.437403	0.592532	-2.01333	0.0440796	0.09082		10.3413	0.479788	1.39454	0.461109	1.04051	0.298104	NA		10.3413	0.775472	1.71175	0.444054	1.74634	0.0807512	0.141861
C01H6.2	mlt-2	196.375	189.197	265.638	219.237	254.788	264.265	168.085	189.715	212.298	163.92	167.772	197.127	356.288	347.66	367.981		236.278	-0.191281	0.875828	0.161323	-1.1857	0.235741	0.415437		236.278	0.181849	1.13434	0.160464	1.13327	0.257102	0.37519		236.278	-0.299998	0.812254	0.162421	-1.84704	0.0647411	0.138944		236.278	0.71917	1.64624	0.155318	4.6303	3.65129e-06	2.72094e-05
C01H6.3	C01H6.3	55.2901	34.1477	40.5051	35.7451	32.5756	31.4869	29.0147	67.9575	46.5311	48.5688	49.7462	58.1526	70.9239	72.2522	91.355		47.9076	0.147636	1.10775	0.312318	0.472709	0.636421	0.772284		47.9076	-0.380251	0.768304	0.328151	-1.15877	0.246551	0.362971		47.9076	0.269285	1.20521	0.310918	0.866097	0.386437	0.513983		47.9076	0.852809	1.80601	0.301662	2.82704	0.00469808	0.0129513
C01H6.4	C01H6.4	104.86	94.1369	109.27	92.9374	88.4195	106.831	100.051	169.894	107.603	87.0191	150.214	130.104	239.473	268.608	257.843		129.968	0.29436	1.22634	0.224113	1.31344	0.189034	0.360379		129.968	-0.0962749	0.935445	0.23076	-0.417208	0.676526	0.768895		129.968	0.254239	1.19271	0.224698	1.13147	0.257858	0.384002		129.968	1.31319	2.48491	0.217205	6.04585	1.48623e-09	2.98263e-08
C01H6.5	nhr-23	997.128	1271.77	1645.64	3827.11	3997.49	3383.72	1339.68	810.77	1300.93	1078.63	653.529	928.47	1260.78	1324.34	1214.94		1813.9	-0.181853	0.88157	0.213715	-0.850912	0.394818	0.578561		1813.9	1.51761	2.86317	0.212847	7.13008	1.00309e-12	3.79743e-11		1813.9	-0.557234	0.679604	0.214158	-2.60198	0.0092688	0.032684		1813.9	-0.0428457	0.970738	0.213429	-0.20075	0.840894	0.884938
C01H6.6	cnnm-4	85.7949	101.52	110.212	85.7884	66.3146	80.9663	87.0442	104.768	90.154	78.9243	88.7629	97.5781	110.141	85.0026	103.308		90.1417	-0.0769006	0.948092	0.196687	-0.39098	0.695812	0.81532		90.1417	-0.352839	0.783042	0.204643	-1.72417	0.084678	0.15502		90.1417	-0.165403	0.89168	0.198228	-0.834406	0.404052	0.530689		90.1417	0.00440844	1.00306	0.193446	0.022789	0.981819	0.988028
C01H6.7	swsn-9	5452.74	5925.09	5258.13	5385.6	5000.36	4906.33	7503.81	4649.42	6113.99	7282.29	5464.28	6000.56	3837.4	3641.51	3618.34		5173.38	0.134882	1.098	0.152872	0.882322	0.377603	0.561893		5173.38	-0.121526	0.919215	0.153026	-0.79415	0.427108	0.550989		5173.38	0.17233	1.12688	0.15287	1.1273	0.259614	0.38591		5173.38	-0.584105	0.667063	0.153029	-3.81697	0.000135101	0.000612551
C01H6.8	C01H6.8	658.714	518.676	306.143	364.601	411.849	396.96	468.238	1244.94	800.722	519.079	716.931	802.309	1235.75	1014.93	1131.27		637.397	0.761192	1.69489	0.286448	2.65735	0.00787569	0.0476497		637.397	-0.338235	0.791008	0.288627	-1.17188	0.241246	0.356552		637.397	0.458468	1.37408	0.28681	1.59851	0.10993	0.204543		637.397	1.18887	2.27974	0.285953	4.15758	3.2164e-05	0.00017797
C01H6.9	hasp-1	1388.92	1656.63	1593.83	1632.36	1420.53	1437.15	2045.04	1020.31	1634.4	1805.14	1177.33	1450.86	881.126	872.126	714.618		1397.24	0.0184455	1.01287	0.208081	0.0886458	0.929363	0.963307		1397.24	-0.0472696	0.967766	0.208339	-0.226888	0.820511	0.877283		1397.24	-0.0656498	0.955515	0.208165	-0.315374	0.752478	0.829071		1397.24	-0.910661	0.531941	0.208761	-4.36222	1.28748e-05	8.15371e-05
C02A12.1	gst-33	7.62622	5.53747	12.2457	0	1.16341	3.3736	3.00152	24.5402	5.81639	7.08295	11.705	6.89946	105.969	108.803	140.875		25.6905	0.404777	1.32388	0.558851	0.724303	0.46888	0.642371		25.6905	-2.45736	0.182079	0.879876	-2.79285	0.00522456	0.0153885		25.6905	0.0189434	1.01322	0.576505	0.0328591	0.973787	0.98337		25.6905	3.80826	14.0088	0.50708	7.51017	5.90489e-14	3.47306e-12
C02A12.10	srbc-33	0.953277	0	0.94198	1.1915	0	1.12453	0	0	3.87759	0	1.95083	0	0	1.70005	0.853785		0.873907	1.04059	2.05707	1.8213	0.571348	0.567764	NA		0.873907	0.296856	1.22846	1.95901	0.151534	0.879555	NA		0.873907	0.0608781	1.0431	1.9607	0.0310491	0.97523	NA		0.873907	0.433256	1.35028	1.86752	0.231996	0.816541	NA
C02A12.2	srbc-29	0	0	0	0	0	0	0	0	0	0	0	0	0.834399	0	0		0.105546	0	1	5.2679	0	1	NA		0.105546	0	1	5.2679	0	1	NA		0.105546	0	1	5.26765	0	1	NA		0.105546	0.810897	1.7543	5.2679	0.153932	0.877664	NA
C02A12.3	srbc-30	0	0	0	0	0	0	0	0.943854	0	0	0	0	0	0	0		0.0524363	1.00963	2.01339	5.2679	0.191656	0.848012	NA		0.0524363	0	1	5.2679	0	1	NA		0.0524363	0	1	5.26765	0	1	NA		0.0524363	0	1	5.2679	0	1	NA
C02A12.4	lys-7	3.81311	1.84582	2.82594	3.57451	3.49024	0	1.00051	8.49468	2.90819	6.0711	4.87708	5.91382	17.5224	13.6004	16.2219		6.38957	0.563495	1.47785	0.844285	0.667423	0.504502	NA		6.38957	-0.276389	0.825655	0.94684	-0.291907	0.770358	0.841278		6.38957	0.993285	1.99071	0.820766	1.21019	0.226205	NA		6.38957	2.48361	5.59296	0.767124	3.23756	0.00120555	0.00404287
C02A12.5	srbc-32	0	0	0	0	0	0	0	0	0	0	0	0.985637	0	0	0		0.286214	0	1	3.88436	0	1	NA		0.286214	0	1	3.88436	0	1	NA		0.286214	1.03886	2.0546	3.88426	0.267453	0.789121	NA		0.286214	0	1	3.88436	0	1	NA
C02A12.6	srbc-36	0	0	0.94198	2.38301	0	1.12453	0	0	0	0	0	0.985637	0	0	0		0.359838	-0.913949	0.53073	3.26712	-0.279741	0.779676	NA		0.359838	1.79484	3.46977	3.15842	0.568272	0.569851	NA		0.359838	0.0770768	1.05488	3.26706	0.0235921	0.981178	NA		0.359838	-1.11268	0.462434	3.26712	-0.340568	0.733429	NA
C02A12.8	oac-2	0.953277	0	0	0	1.16341	2.24906	1.00051	1.88771	0.969398	0	0	0	0.834399	0	0		0.503209	1.93609	3.82668	2.34108	0.827008	0.408233	NA		0.503209	1.76482	3.39831	2.37928	0.741744	0.458242	NA		0.503209	-0.884692	0.541603	2.51891	-0.35122	0.725423	NA		0.503209	-0.150888	0.900696	2.51894	-0.0599015	0.952234	NA
C02B10.1	ivd-1	756.902	746.635	608.519	831.67	644.532	655.602	672.341	470.039	584.547	762.935	655.48	506.618	380.486	389.312	417.501		645.263	-0.290829	0.817432	0.173493	-1.67632	0.0936765	0.230148		645.263	0.0131755	1.00917	0.173383	0.0759907	0.939427	0.959522		645.263	-0.133938	0.91134	0.173207	-0.773287	0.439353	0.564252		645.263	-0.831019	0.562132	0.174391	-4.76526	1.8861e-06	1.52666e-05
C02B10.12	21ur-4870	0	0	0	0	0	0	0	0	0	0	0	0	0.834399	0	0		0.0463555	0	1	5.2679	0	1	NA		0.0463555	0	1	5.2679	0	1	NA		0.0463555	0	1	5.26765	0	1	NA		0.0463555	0.810897	1.7543	5.2679	0.153932	0.877664	NA
C02B10.17	21ur-3953	0	0	0	0	0	0	0	0	0	0	0	0	0	0	0		0.0578846	0	1	5.2679	0	1	NA		0.0578846	0	1	5.2679	0	1	NA		0.0578846	0	1	5.26765	0	1	NA		0.0578846	0	1	5.2679	0	1	NA
C02B10.2	snpn-1	3837.89	2467.86	1777.52	1851.6	1718.36	1739.65	2615.33	4107.65	3683.71	3056.8	2895.03	3586.73	2129.39	1893.01	1808.32		2400.3	0.364582	1.28751	0.219101	1.66399	0.0961142	0.234553		2400.3	-0.606315	0.656872	0.219695	-2.75981	0.00578351	0.0167733		2400.3	0.238866	1.18006	0.219151	1.08996	0.275731	0.403387		2400.3	-0.471222	0.721353	0.219347	-2.1483	0.0316902	0.0650724
C02B10.20	21ur-2121	1.90655	1.84582	3.76792	1.1915	3.49024	5.62266	1.00051	1.88771	2.90819	1.01185	2.92625	1.97127	3.3376	2.55008	1.70757		3.57966	-0.370008	0.773778	0.955243	-0.387344	0.698502	NA		3.57966	0.46595	1.38123	0.893022	0.521768	0.601832	NA		3.57966	-0.341068	0.789457	0.95529	-0.357031	0.721069	NA		3.57966	0.0172101	1.012	0.89249	0.0192832	0.984615	NA
C02B10.21	21ur-62	0	0	0	0	0	0	0	0	0	0	0	1.97127	0	0	0		0.109515	0	1	5.2679	0	1	NA		0.109515	0	1	5.2679	0	1	NA		0.109515	1.92765	3.80435	5.23513	0.368214	0.712714	NA		0.109515	0	1	5.2679	0	1	NA
C02B10.22	21ur-5230	0	0.922911	0	1.1915	0	0	0	0	0	0	0	0	0	0	0		0.174658	-0.913941	0.530733	5.2679	-0.173492	0.862264	NA		0.174658	0.303821	1.23441	5.2679	0.057674	0.954008	NA		0.174658	-0.884639	0.541623	5.26765	-0.167938	0.866632	NA		0.174658	-1.11267	0.462437	5.2679	-0.211217	0.832718	NA
C02B10.23	21ur-3444	0	0	0	1.1915	0	0	0	0	0	0	0	0	0	0	0		0.0661947	0	1	5.2679	0	1	NA		0.0661947	1.2656	2.40428	5.2679	0.240248	0.810138	NA		0.0661947	0	1	5.26765	0	1	NA		0.0661947	0	1	5.2679	0	1	NA
C02B10.26	21ur-4762	0	0	0	0	0	0	0	0	0	0	0	0	0.834399	0	0		0.0463555	0	1	5.2679	0	1	NA		0.0463555	0	1	5.2679	0	1	NA		0.0463555	0	1	5.26765	0	1	NA		0.0463555	0.810897	1.7543	5.2679	0.153932	0.877664	NA
C02B10.29	21ur-778	0	0	0	0	1.16341	0	0	0	0	0	0	0	0	0	0		0.0646342	0	1	5.2679	0	1	NA		0.0646342	1.2656	2.40428	5.2679	0.240248	0.810138	NA		0.0646342	0	1	5.26765	0	1	NA		0.0646342	0	1	5.2679	0	1	NA
C02B10.3	C02B10.3	2408.93	2398.65	2647.9	4972.15	5420.35	5263.93	2809.43	2948.6	2984.78	2803.84	3528.08	2875.1	3419.37	3593.06	3368.18		3608.23	0.229835	1.1727	0.100385	2.28952	0.0220489	0.0929531		3608.23	1.07041	2.10003	0.100001	10.704	9.74578e-27	2.62276e-24		3608.23	0.304523	1.23501	0.100349	3.03463	0.00240832	0.0119676		3608.23	0.477524	1.39235	0.100078	4.77151	1.82848e-06	1.48853e-05
C02B10.31	21ur-6198	0	0	0.94198	0	2.32683	0	0	0	0	0	0	0	0	0	0		0.181601	-0.913941	0.530733	5.2679	-0.173492	0.862264	NA		0.181601	1.20427	2.30421	5.23459	0.23006	0.818045	NA		0.181601	-0.88464	0.541623	5.26765	-0.167938	0.866632	NA		0.181601	-1.11267	0.462437	5.2679	-0.211217	0.832718	NA
C02B10.32	21ur-6371	0	0	0	0	0	0	0	0	0	0	0	0	0	0	0		0.17296	0	1	5.2679	0	1	NA		0.17296	0	1	5.2679	0	1	NA		0.17296	0	1	5.26765	0	1	NA		0.17296	0	1	5.2679	0	1	NA
C02B10.33	21ur-9336	0	0	0	0	0	0	0	0	0	0	0	0	0	0	0		0.114381	0	1	5.2679	0	1	NA		0.114381	0	1	5.2679	0	1	NA		0.114381	0	1	5.26765	0	1	NA		0.114381	0	1	5.2679	0	1	NA
C02B10.34	21ur-12642	0	0	0.94198	0	0	0	0	0	0	0	0	0	0	0	0		0.0523322	-0.913941	0.530733	5.2679	-0.173492	0.862264	NA		0.0523322	-0.657962	0.633773	5.2679	-0.1249	0.900603	NA		0.0523322	-0.884666	0.541613	5.26765	-0.167943	0.866628	NA		0.0523322	-1.11267	0.462437	5.2679	-0.211217	0.832718	NA
C02B10.35	21ur-9085	0	0	0	0	0	0	0	0	0	0	0	0	0.834399	0	0		0.0463555	0	1	5.2679	0	1	NA		0.0463555	0	1	5.2679	0	1	NA		0.0463555	0	1	5.26765	0	1	NA		0.0463555	0.810897	1.7543	5.2679	0.153932	0.877664	NA
C02B10.38	21ur-10249	0	0	0	2.38301	3.49024	0	0	0	0	2.0237	0	0	0	0	0.853785		0.543343	0	1	2.99887	0	1	NA		0.543343	3.50002	11.3139	2.83148	1.23611	0.216418	NA		0.543343	1.9575	3.88389	2.93767	0.666344	0.505191	NA		0.543343	0.810904	1.75431	2.99887	0.270403	0.78685	NA
C02B10.4	C02B10.4	8463.19	7295.61	5455	5303.39	4709.5	5191.96	9777.96	9028.91	8570.44	10948.2	13288.1	10408.3	4329.7	4421.83	3613.22		6884.65	0.367976	1.29054	0.152604	2.41131	0.0158955	0.0755608		6884.65	-0.480467	0.716746	0.152882	-3.14272	0.00167384	0.00581364		6884.65	0.707642	1.63313	0.152558	4.63853	3.50904e-06	0.000125728		6884.65	-0.778755	0.582869	0.152829	-5.0956	3.47635e-07	3.46575e-06
C02B10.40	21ur-15226	0	0	0	0	1.16341	0	0	0	0	0	0.975416	0	0	0	0		0.176709	0	1	5.2679	0	1	NA		0.176709	1.2656	2.40428	5.2679	0.240248	0.810138	NA		0.176709	1.03883	2.05457	5.26765	0.19721	0.843663	NA		0.176709	0	1	5.2679	0	1	NA
C02B10.41	21ur-5783	0.953277	0	2.82594	1.1915	0	0	0	0.943854	0	2.0237	4.87708	0	1.6688	0.850026	1.70757		0.946764	-1.85355	0.276711	1.95392	-0.948628	0.34281	NA		0.946764	-1.59756	0.330434	1.95392	-0.817619	0.413575	NA		0.946764	0.873309	1.83186	1.65189	0.528672	0.597033	NA		0.946764	0.164664	1.1209	1.68724	0.0975933	0.922255	NA
C02B10.42	21ur-13854	0	0	0	0	0	0	0	0.943854	0	0	0	0	0	0	0		0.0524363	1.00963	2.01339	5.2679	0.191656	0.848012	NA		0.0524363	0	1	5.2679	0	1	NA		0.0524363	0	1	5.26765	0	1	NA		0.0524363	0	1	5.2679	0	1	NA
C02B10.43	21ur-9076	1.90655	0	0	0	1.16341	1.12453	0	0	0.969398	0	0	0.985637	0	0.850026	0.853785		0.609257	-0.85948	0.551151	2.19279	-0.391956	0.69509	NA		0.609257	0.281961	1.21585	2.11401	0.133377	0.893895	NA		0.609257	-0.830237	0.562437	2.19277	-0.378624	0.704967	NA		0.609257	-0.156939	0.896926	2.11131	-0.0743328	0.940746	NA
C02B10.47	21ur-5726	0	0	0.94198	0	0	0	1.00051	0	0	0	0	0	0.834399	0	0.853785		0.201704	0.0478427	1.03372	4.36755	0.0109541	0.99126	NA		0.201704	-0.657965	0.633772	4.36755	-0.150649	0.880253	NA		0.201704	-0.884657	0.541616	4.3674	-0.202559	0.83948	NA		0.201704	0.742097	1.67261	4.32791	0.171468	0.863856	NA
C02B10.48	21ur-6396	0	0	0	0	0	0	0	0	0	0	0.975416	0	0	0	0		0.0541898	0	1	5.2679	0	1	NA		0.0541898	0	1	5.2679	0	1	NA		0.0541898	1.03881	2.05453	5.26765	0.197205	0.843667	NA		0.0541898	0	1	5.2679	0	1	NA
[truncated: 29,887 more rows]

## Sheet: P. vran alone
	Alternate gene name	CELEG:HB101_1	CELEG:HB101_2	CELEG:HB101_3	CELEG:15C5_1	CELEG:15C5_2	CELEG:15C5_3	CELEG:Aeromonas_1	CELEG:Aeromonas_2	CELEG:Aeromonas_3	CELEG:Serretia_1	CELEG:Serretia_2	CELEG:Serretia_3	CELEG:P. vranovensis 427_1	CELEG:P. vranovensis_2	CELEG:P. vranovensis_3		baseMeanAeromonas	log2FoldChangeAeromona	Fold Change	lfcSEAeromonas	statAeromonas	pvalueAeromonas	padjAeromonas		baseMeanI5C5	log2FoldChangeI5C5	Fold Change	lfcSE15C5	stat15C5	pvalue15C5	padj15C5		baseMeanB248	log2FoldChangeSerretia	Fold Change	lfcSESerretia	statSerretia	pvalueSerretia	padjSerretia		baseMeanB427	log2FoldChangeP. vranovensisB427	Fold Change	lfcSEP. vranovensisB427	statP. vranovensisB427	pvalueP. Vraonvensis	padjP. Vranovensis
[truncated: 2,099 more rows]

[truncated: 6 more sheets: Aeromonas alone, P. 15C5 alone, Serretia alone, P. vranovensis and P. 15C5, P. vran and Aero, P. vran and Serretia]
