# Supplementary figures and images for: Intergenerational adaptations to stress are evolutionarily conserved, stress-specific, and have deleterious trade-offs
Source: eLife journal article supplement (doi:10.7554/elife.73425), 2021-10-06

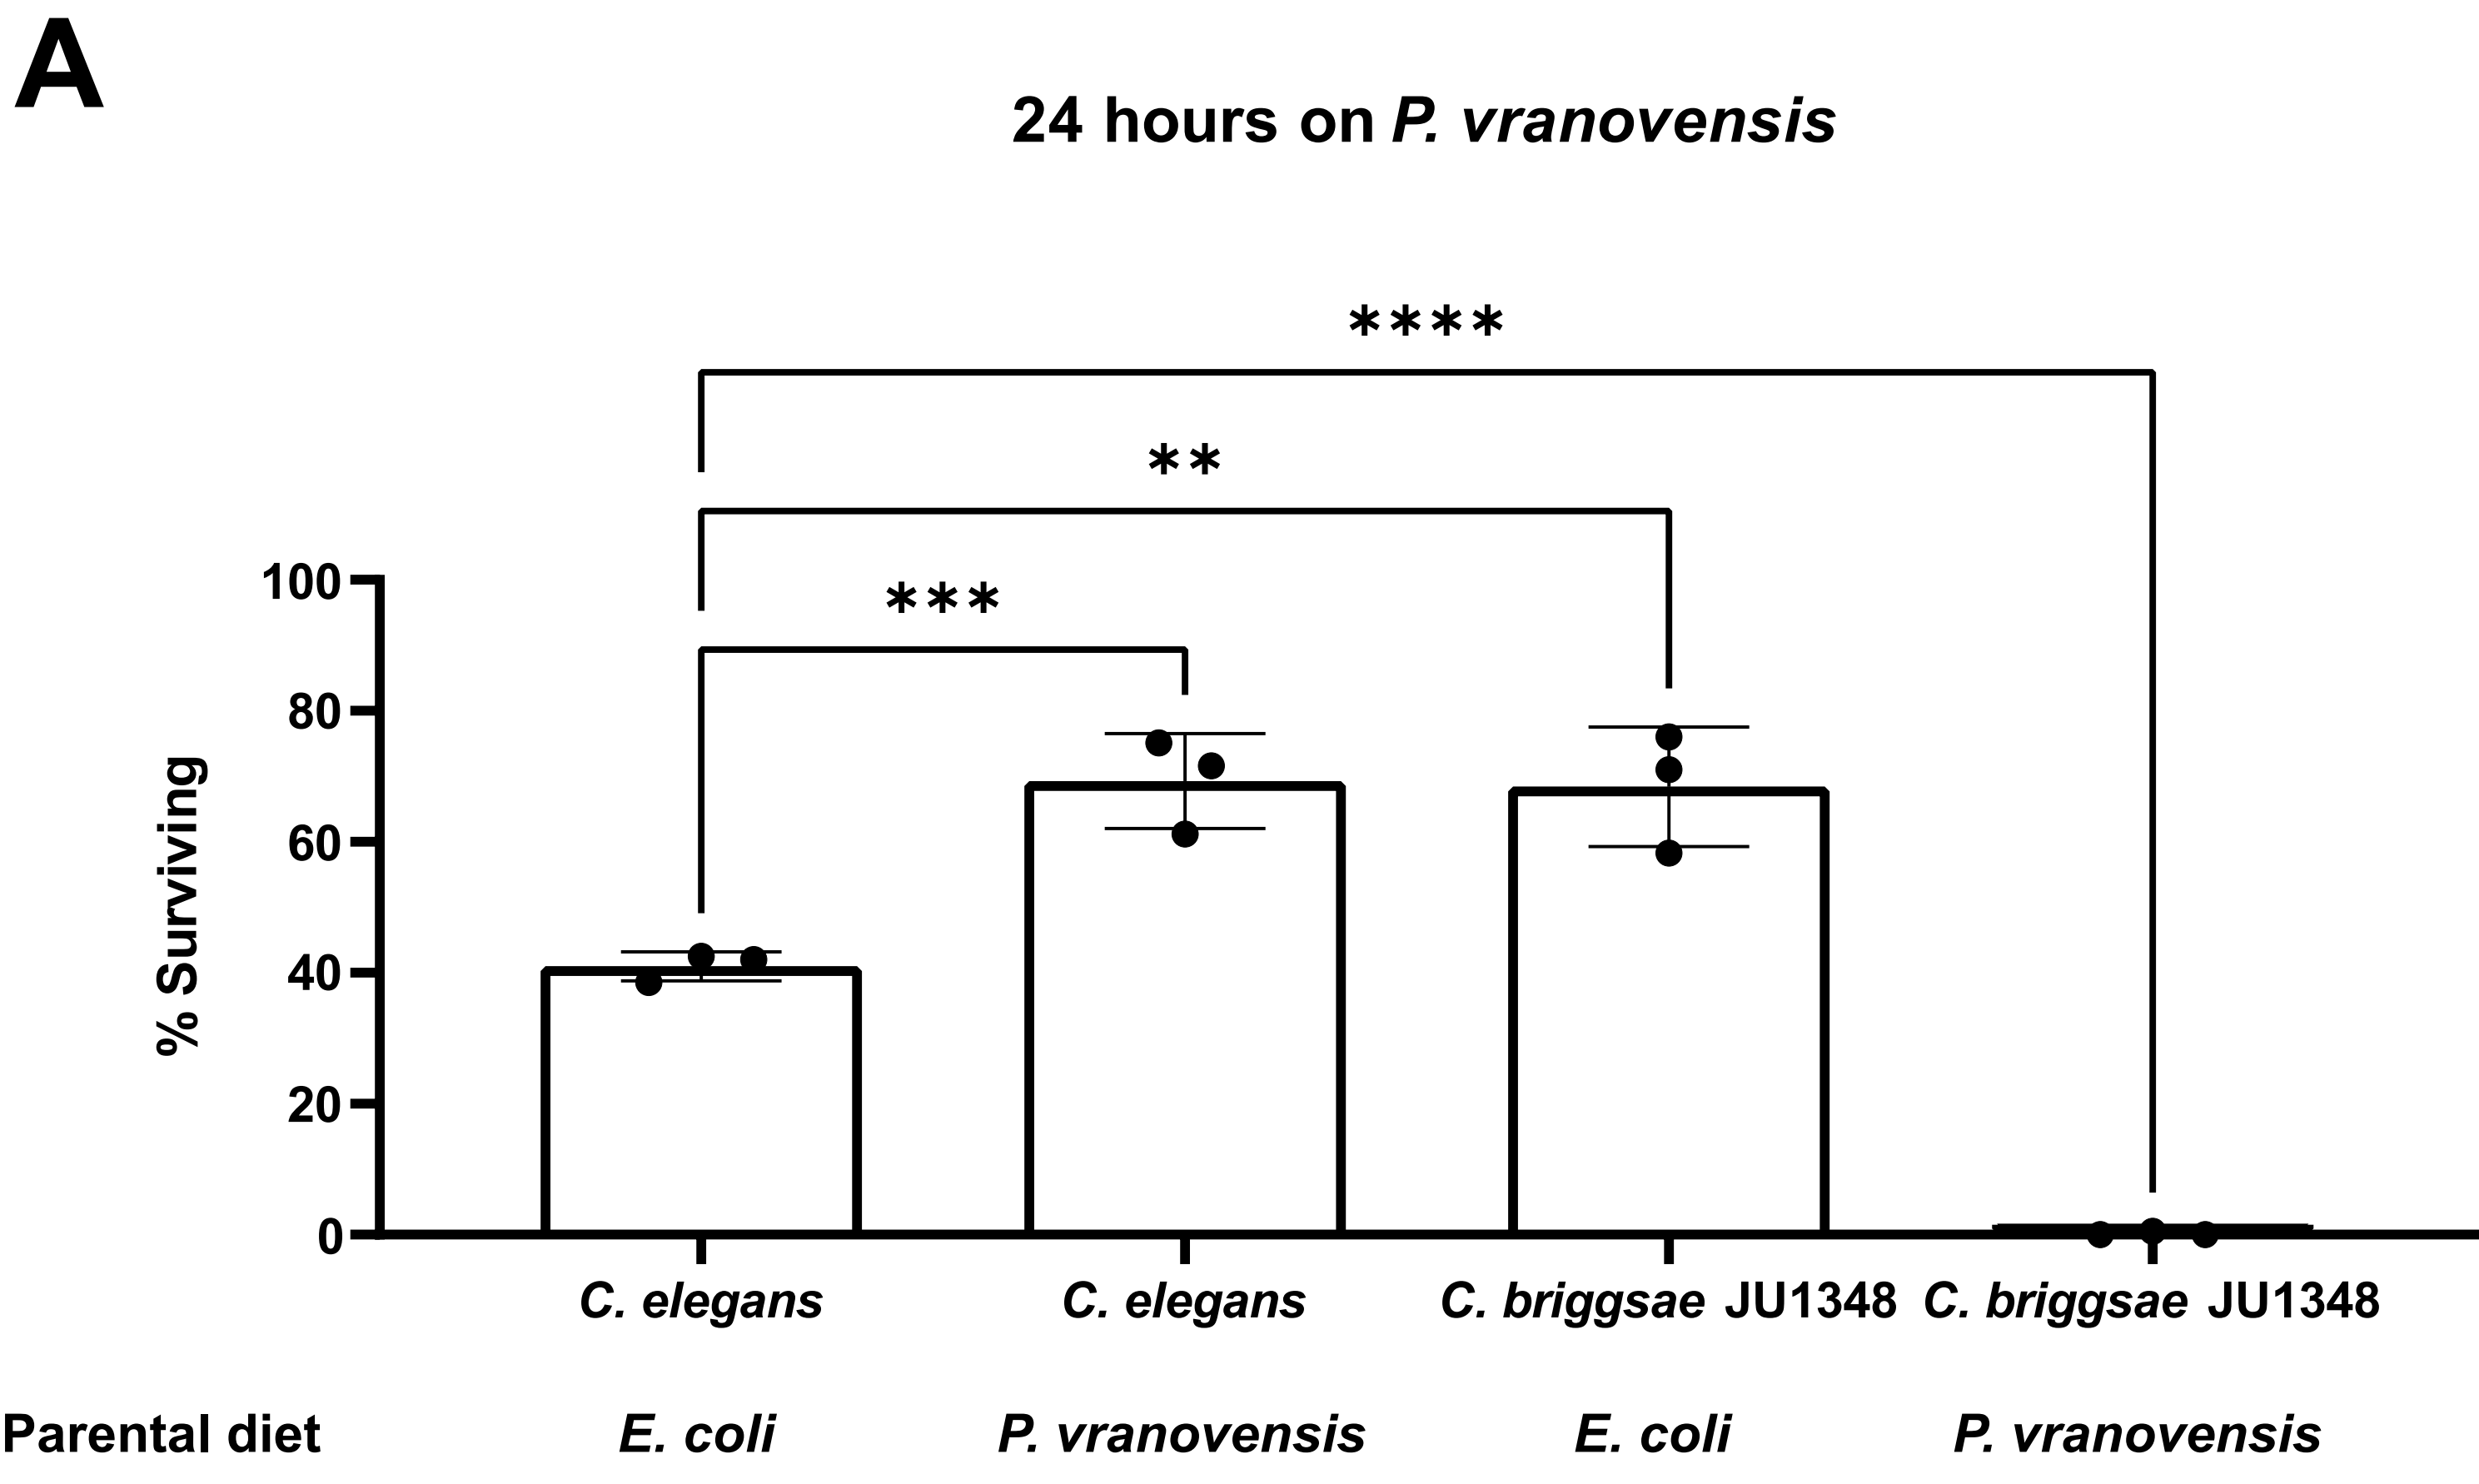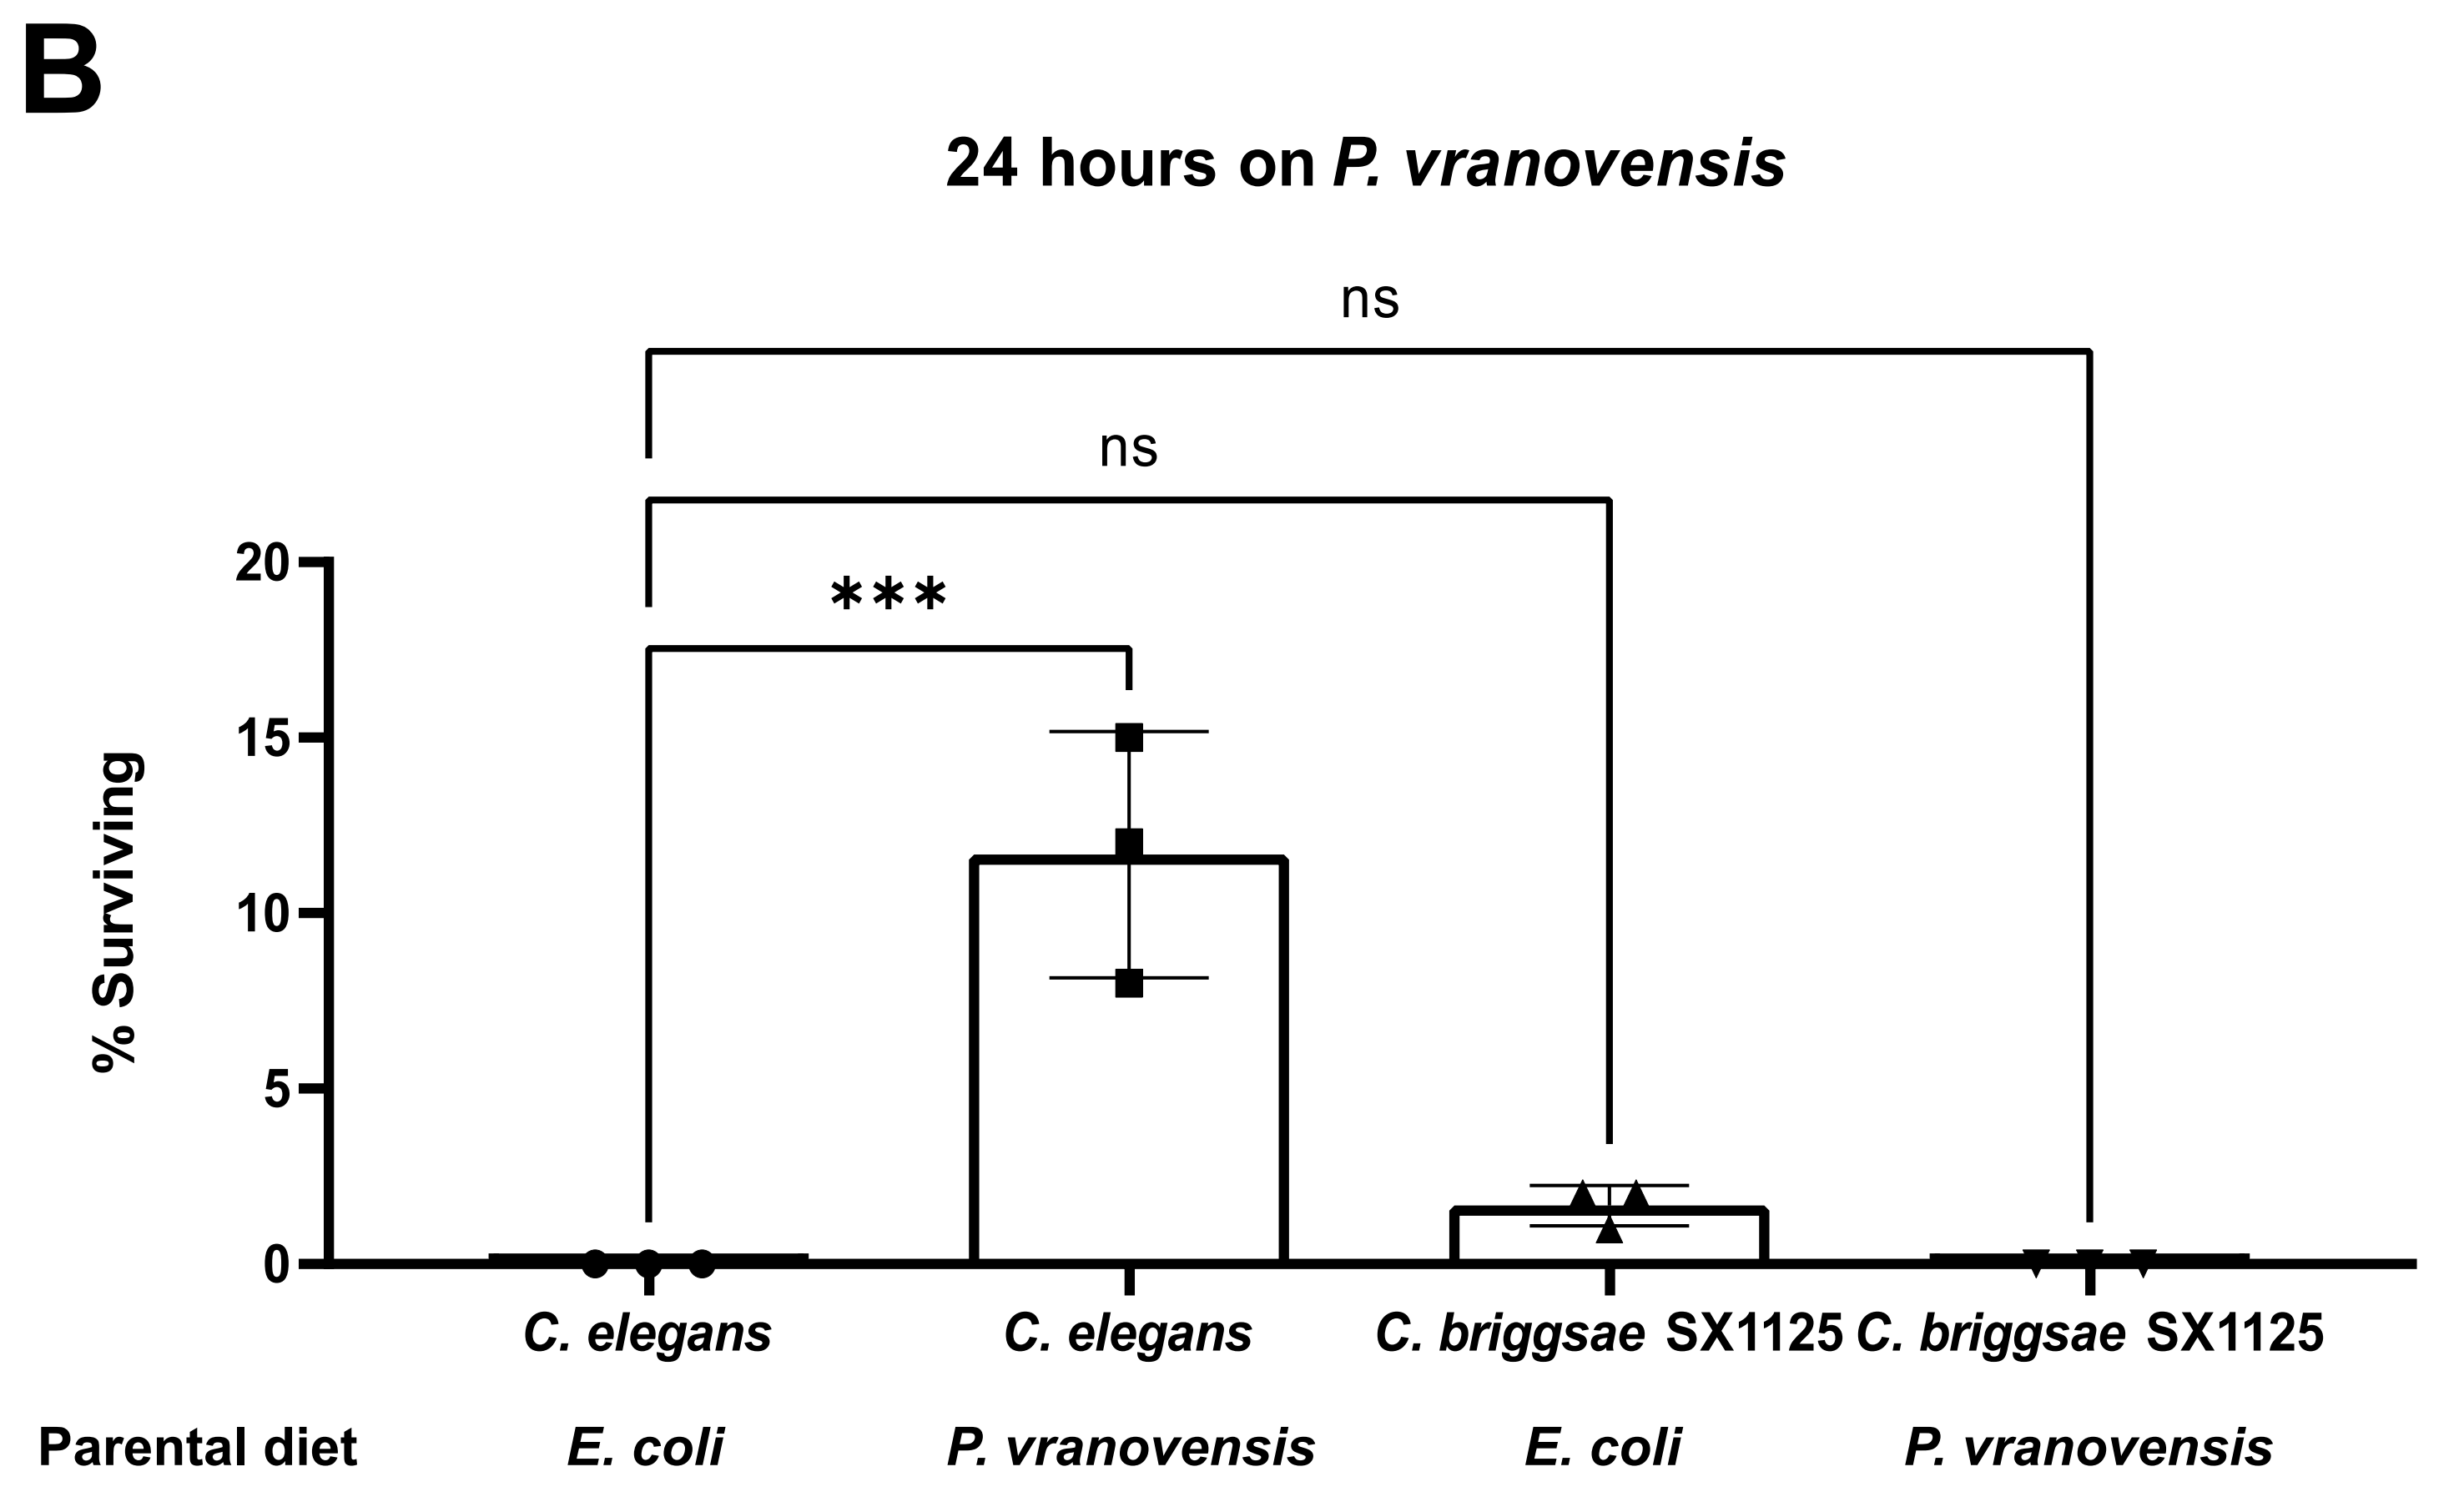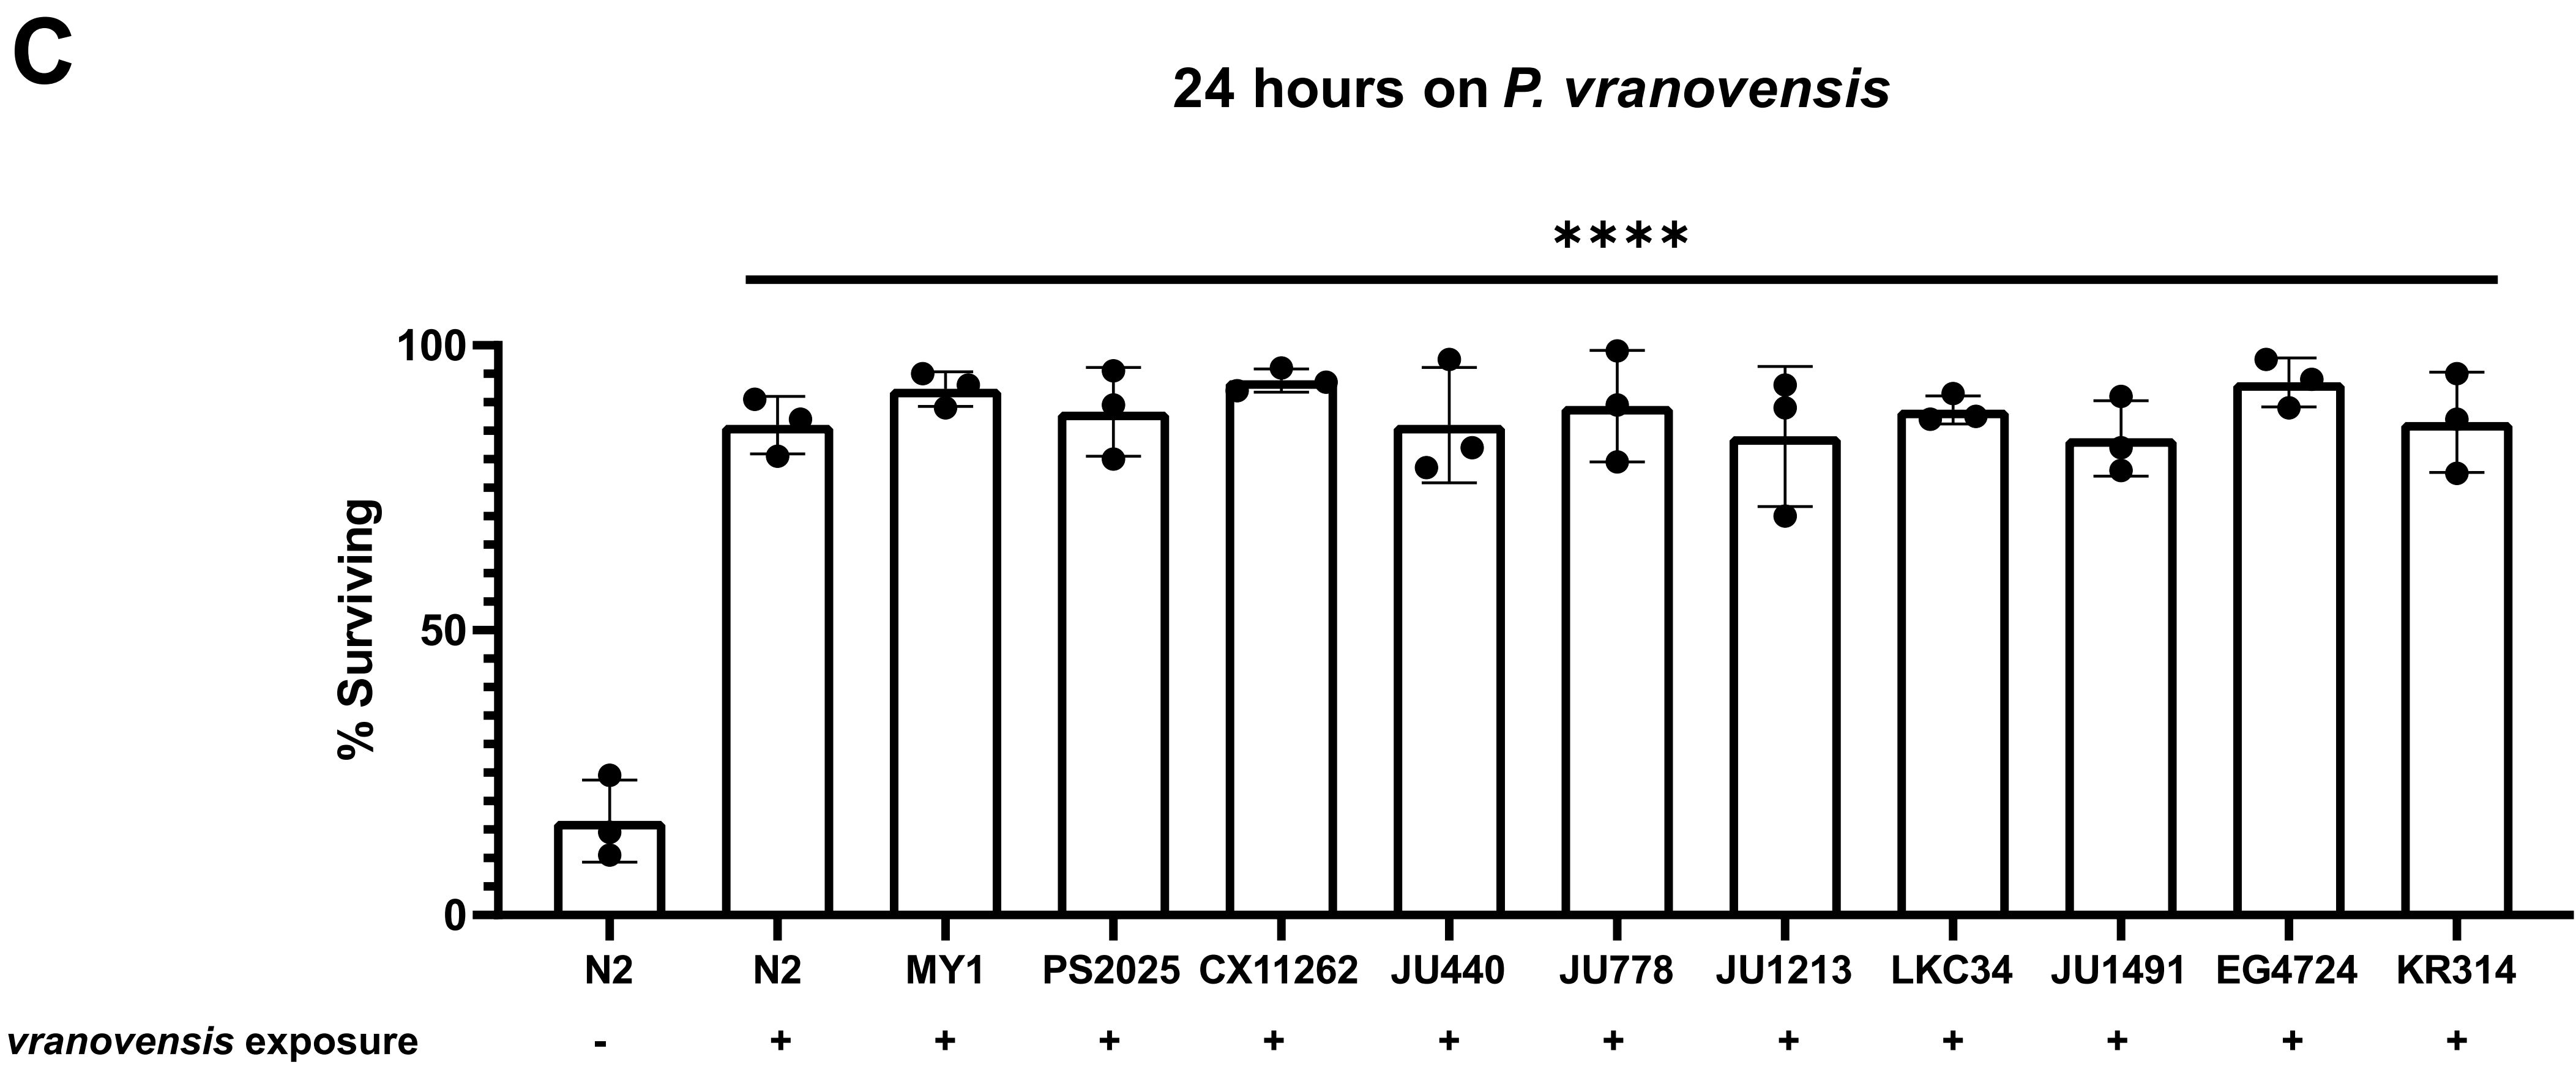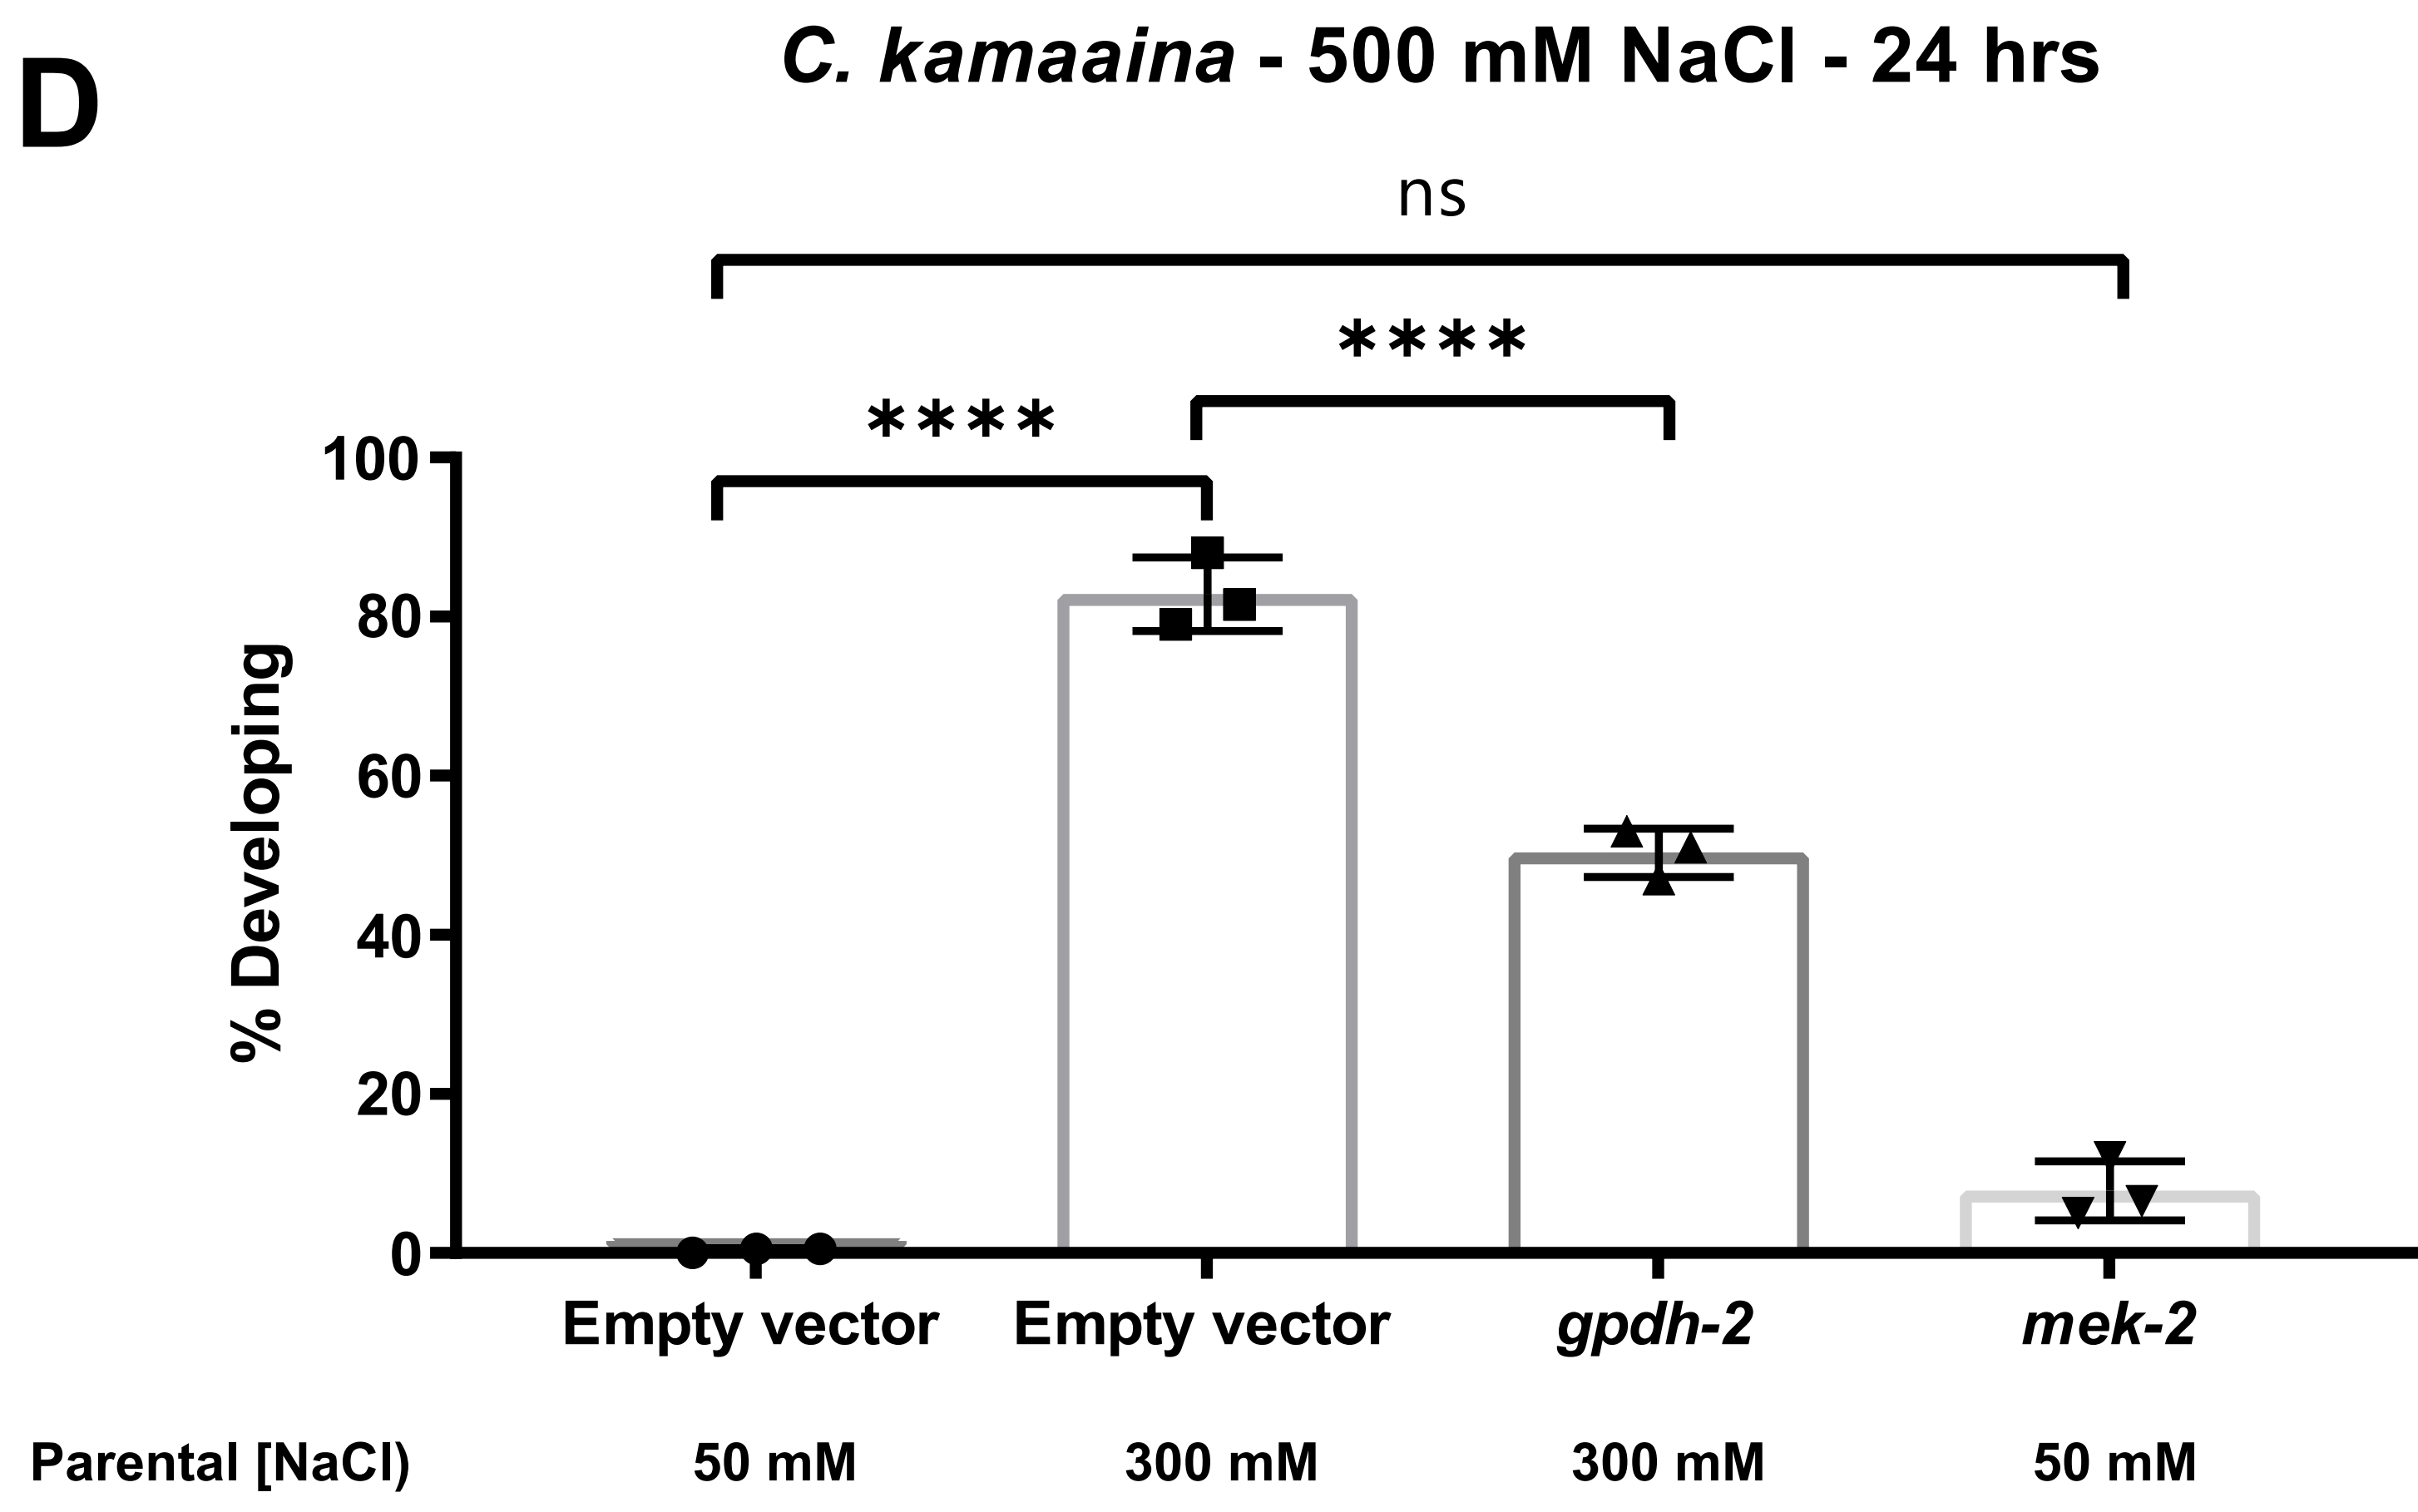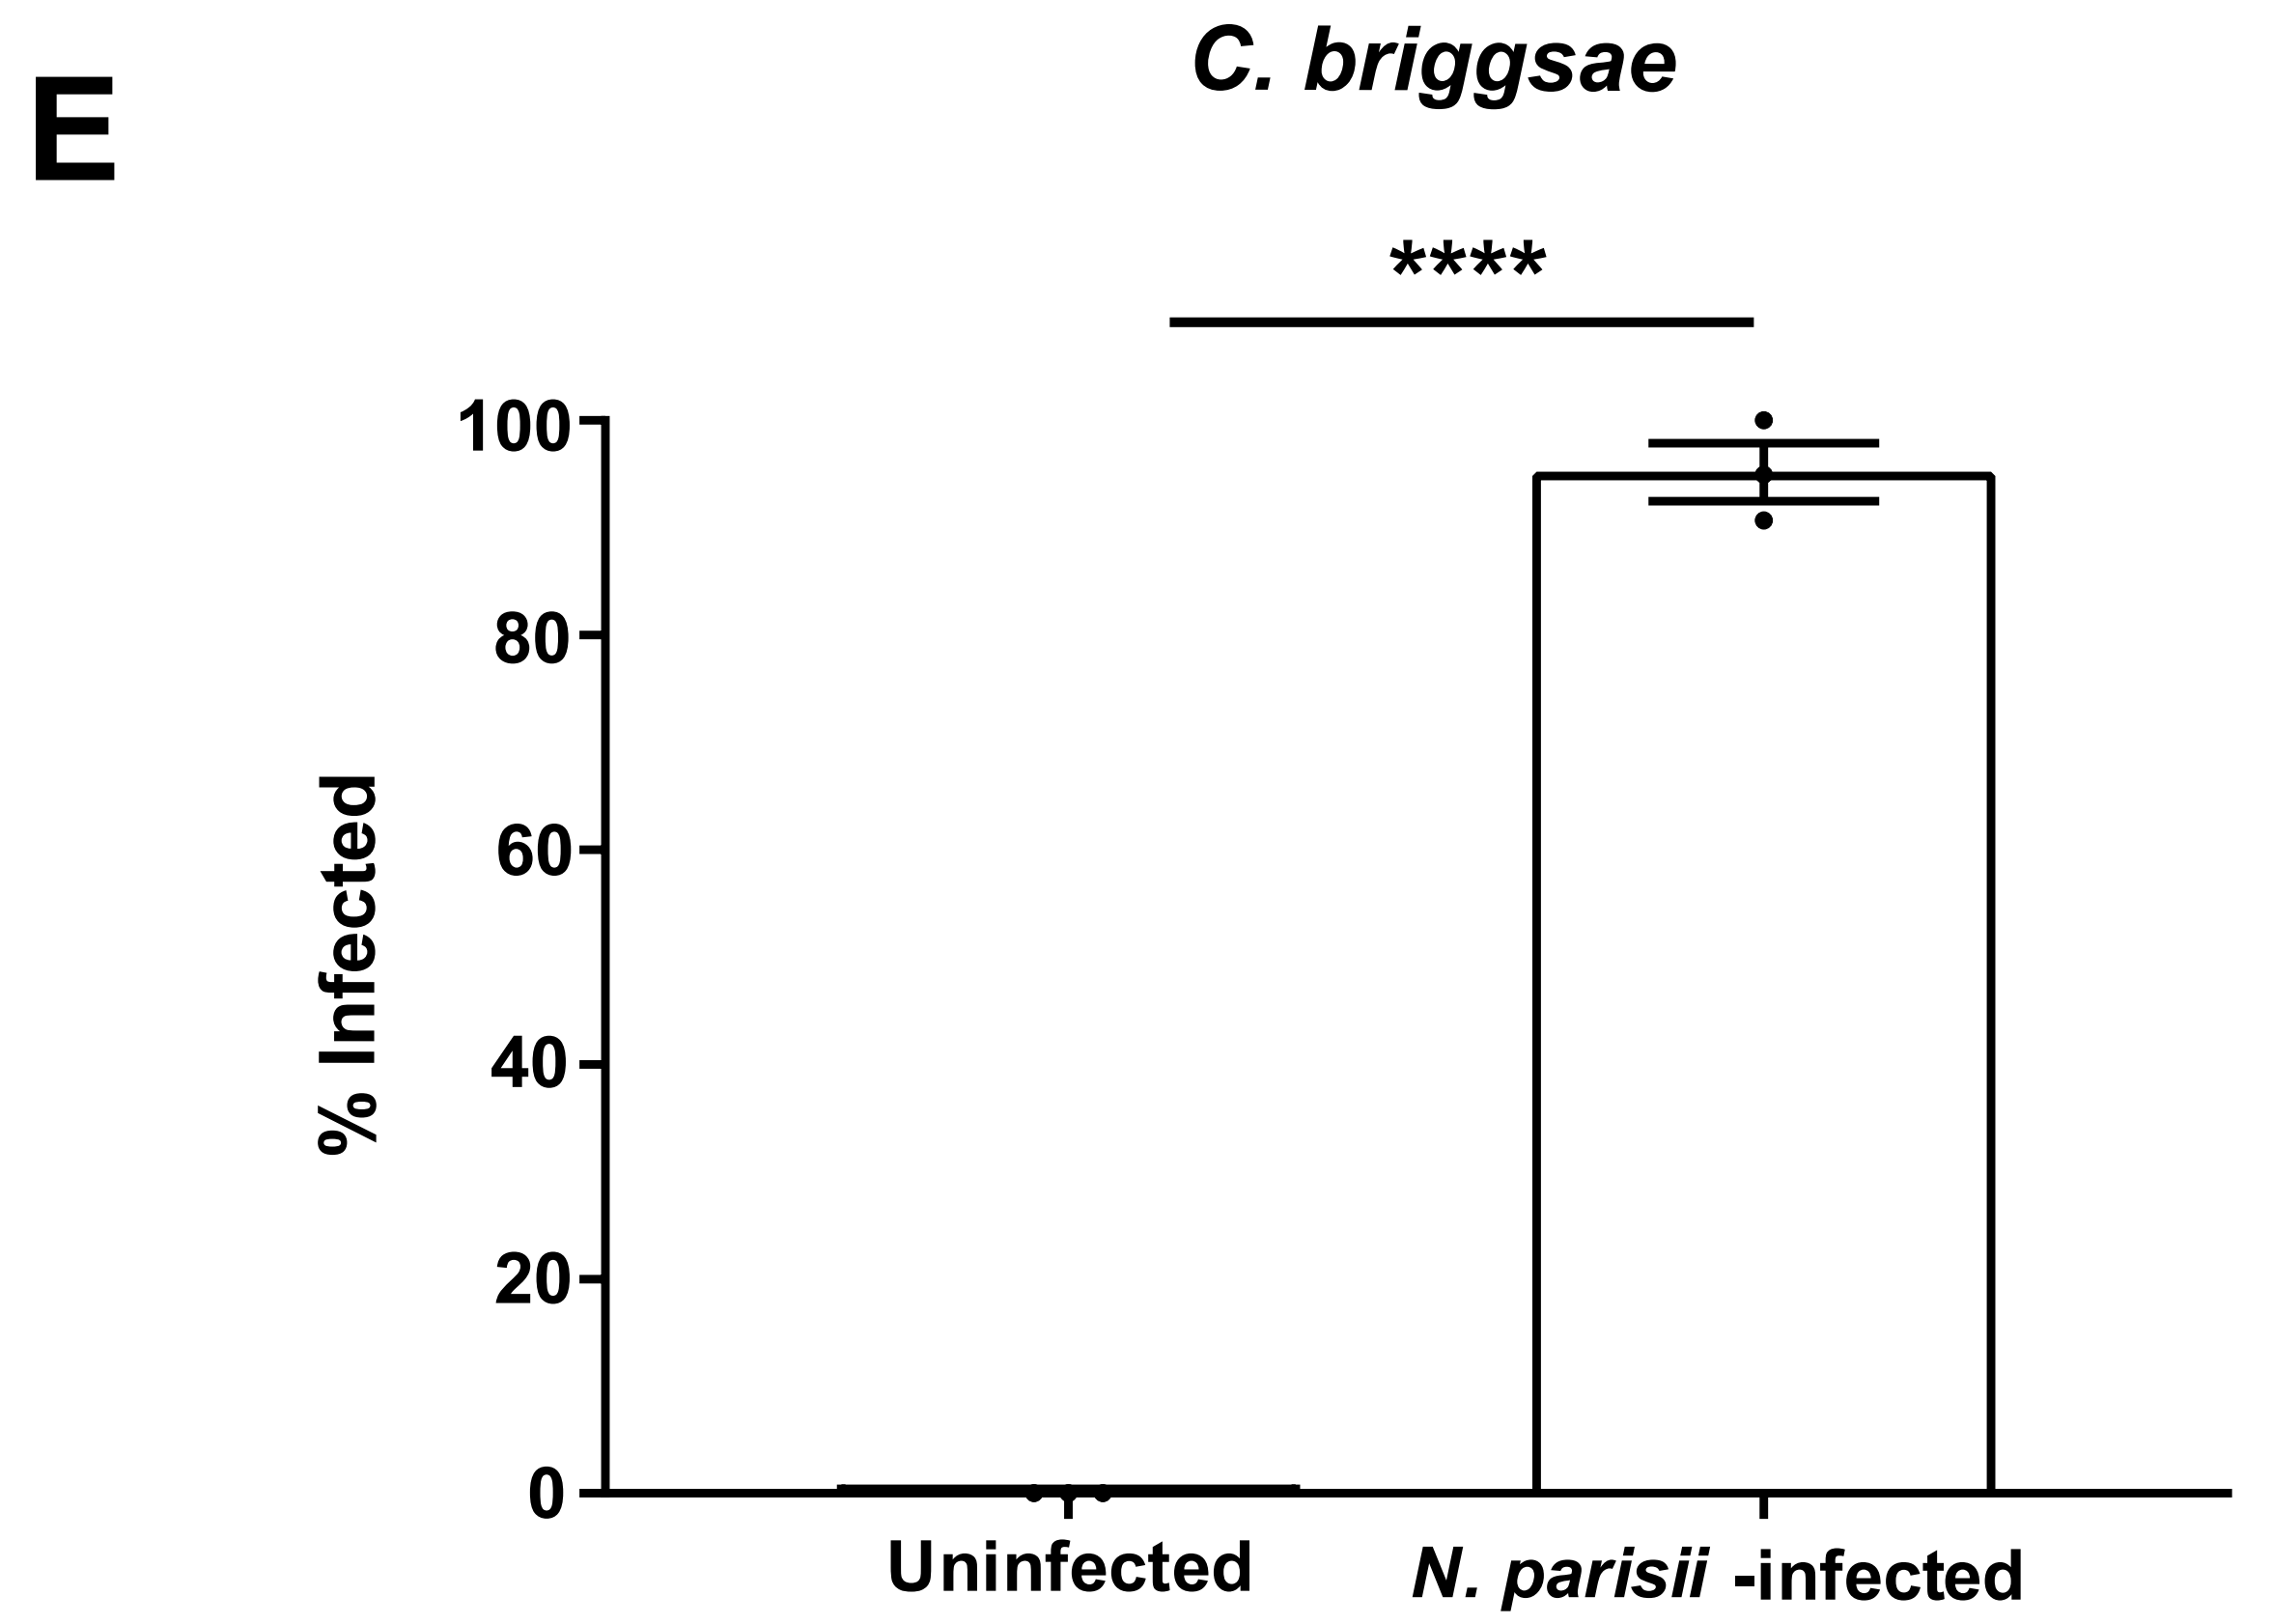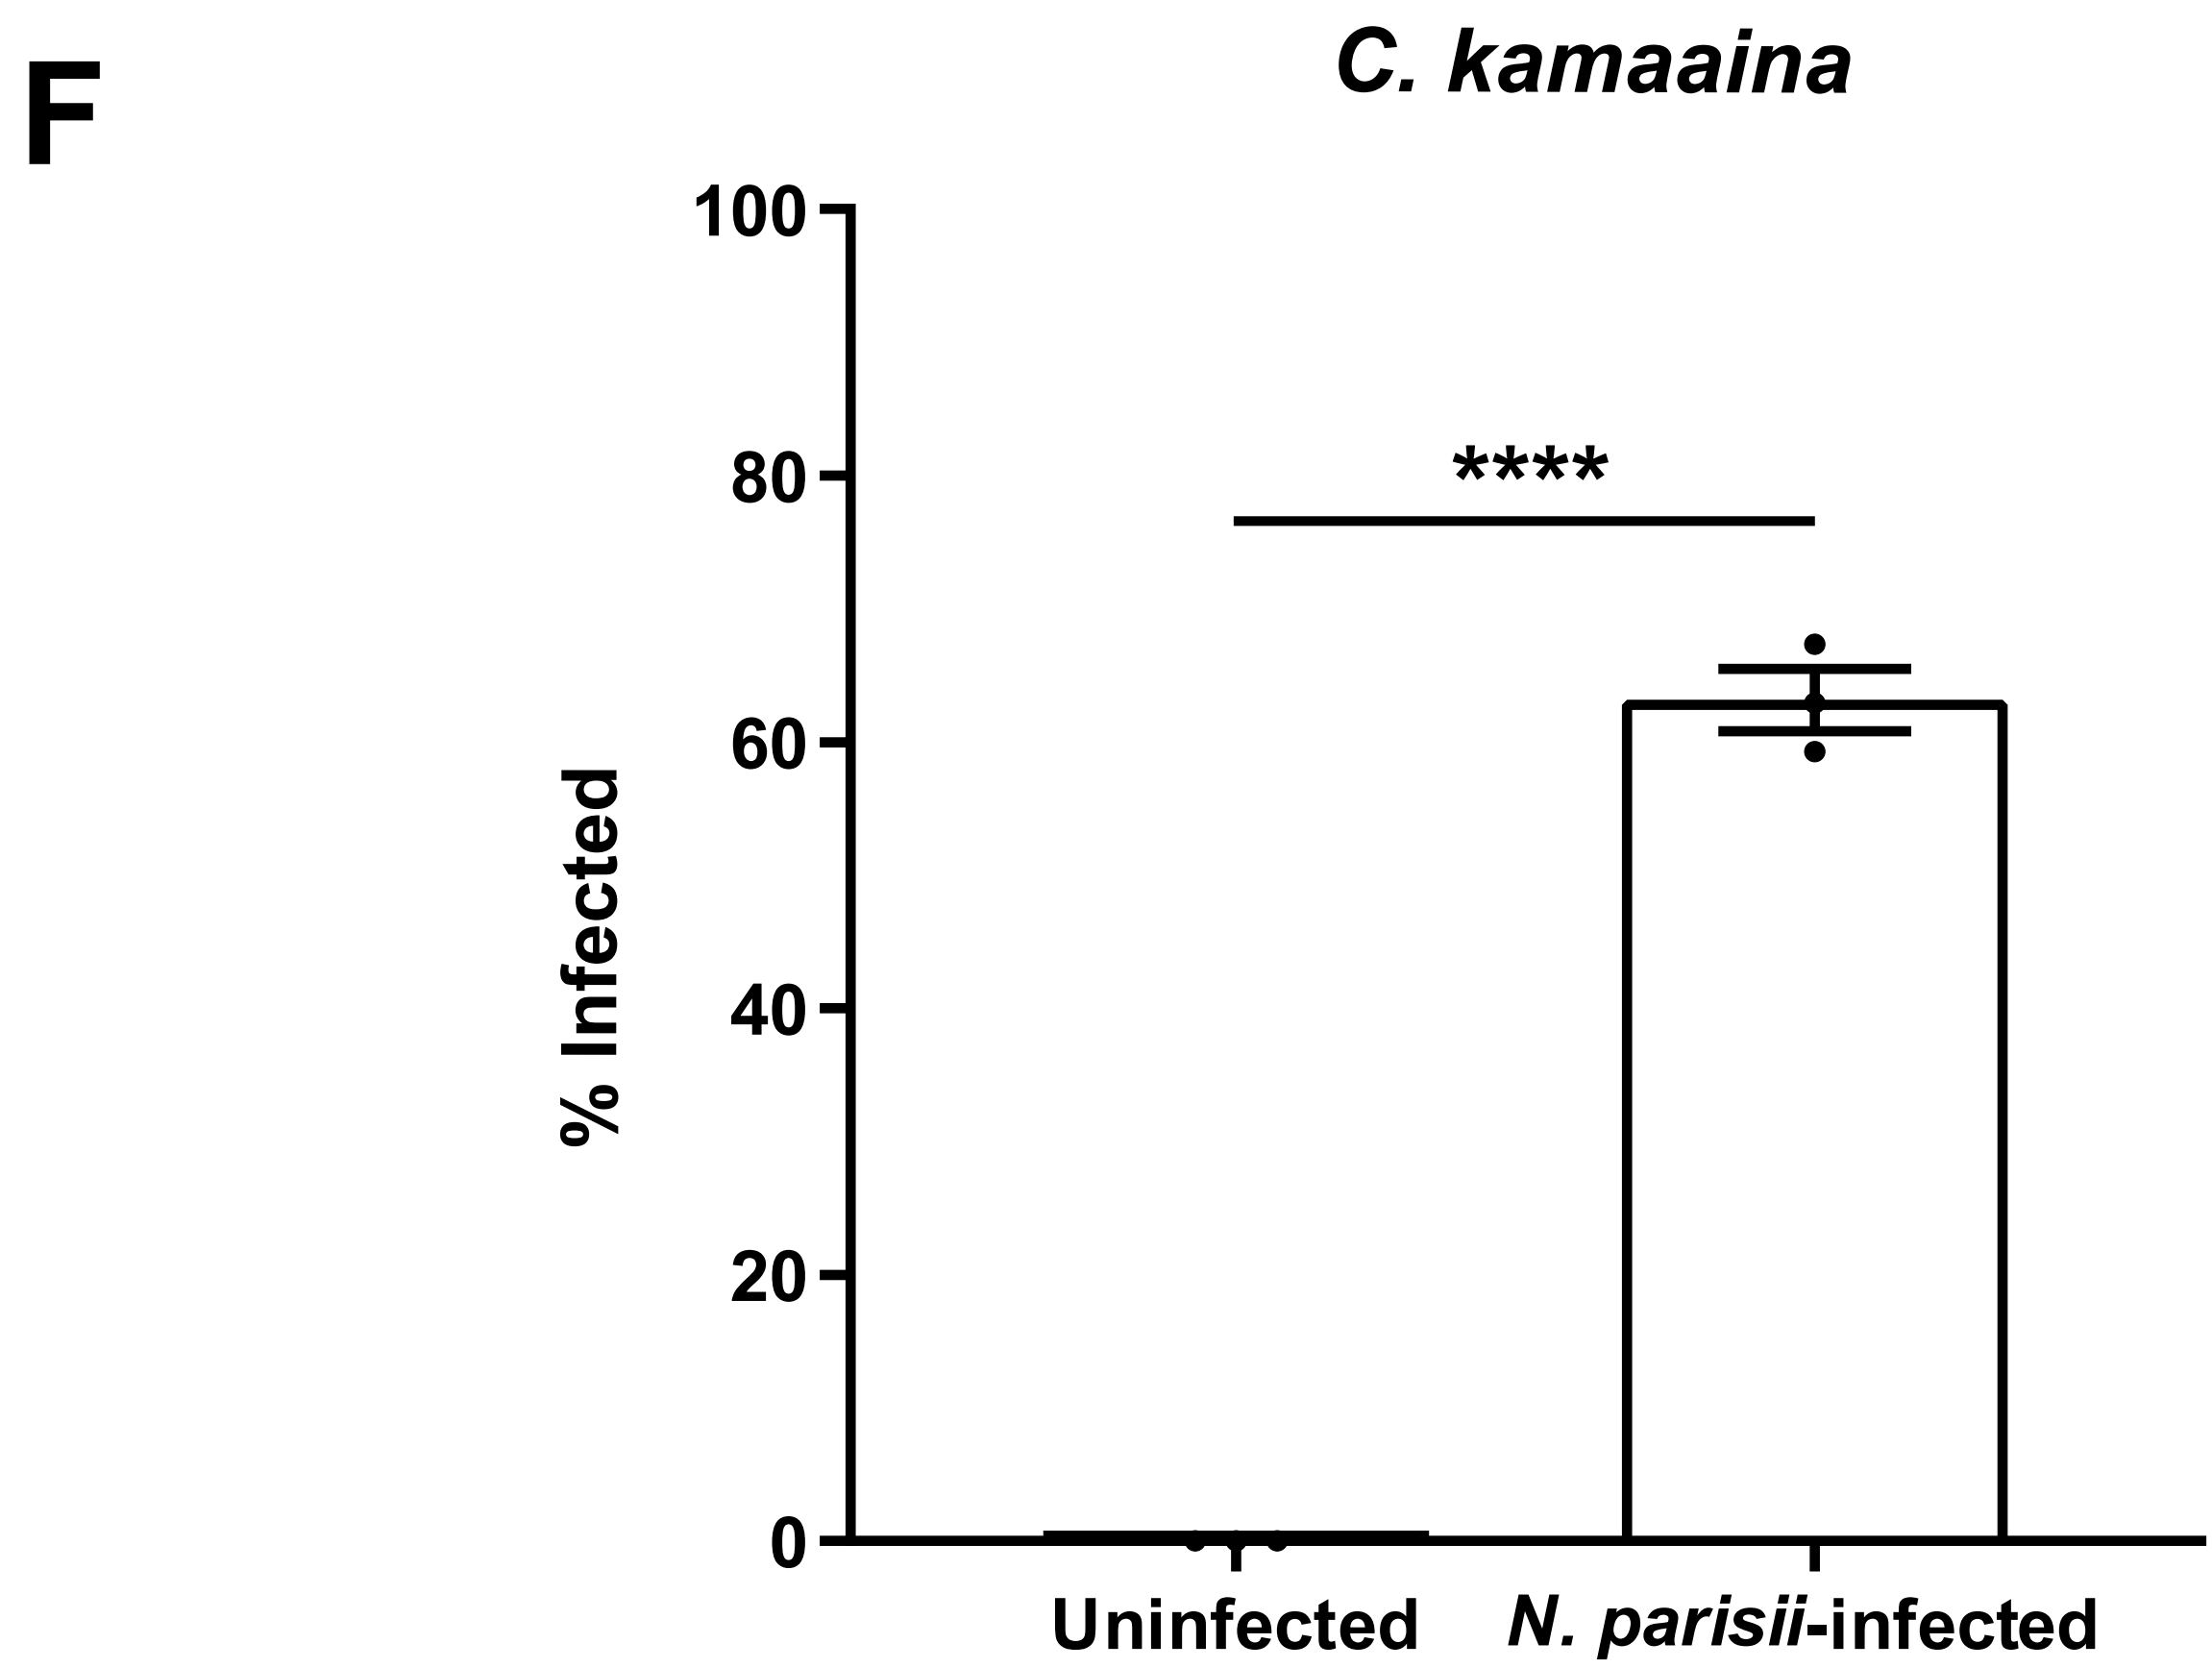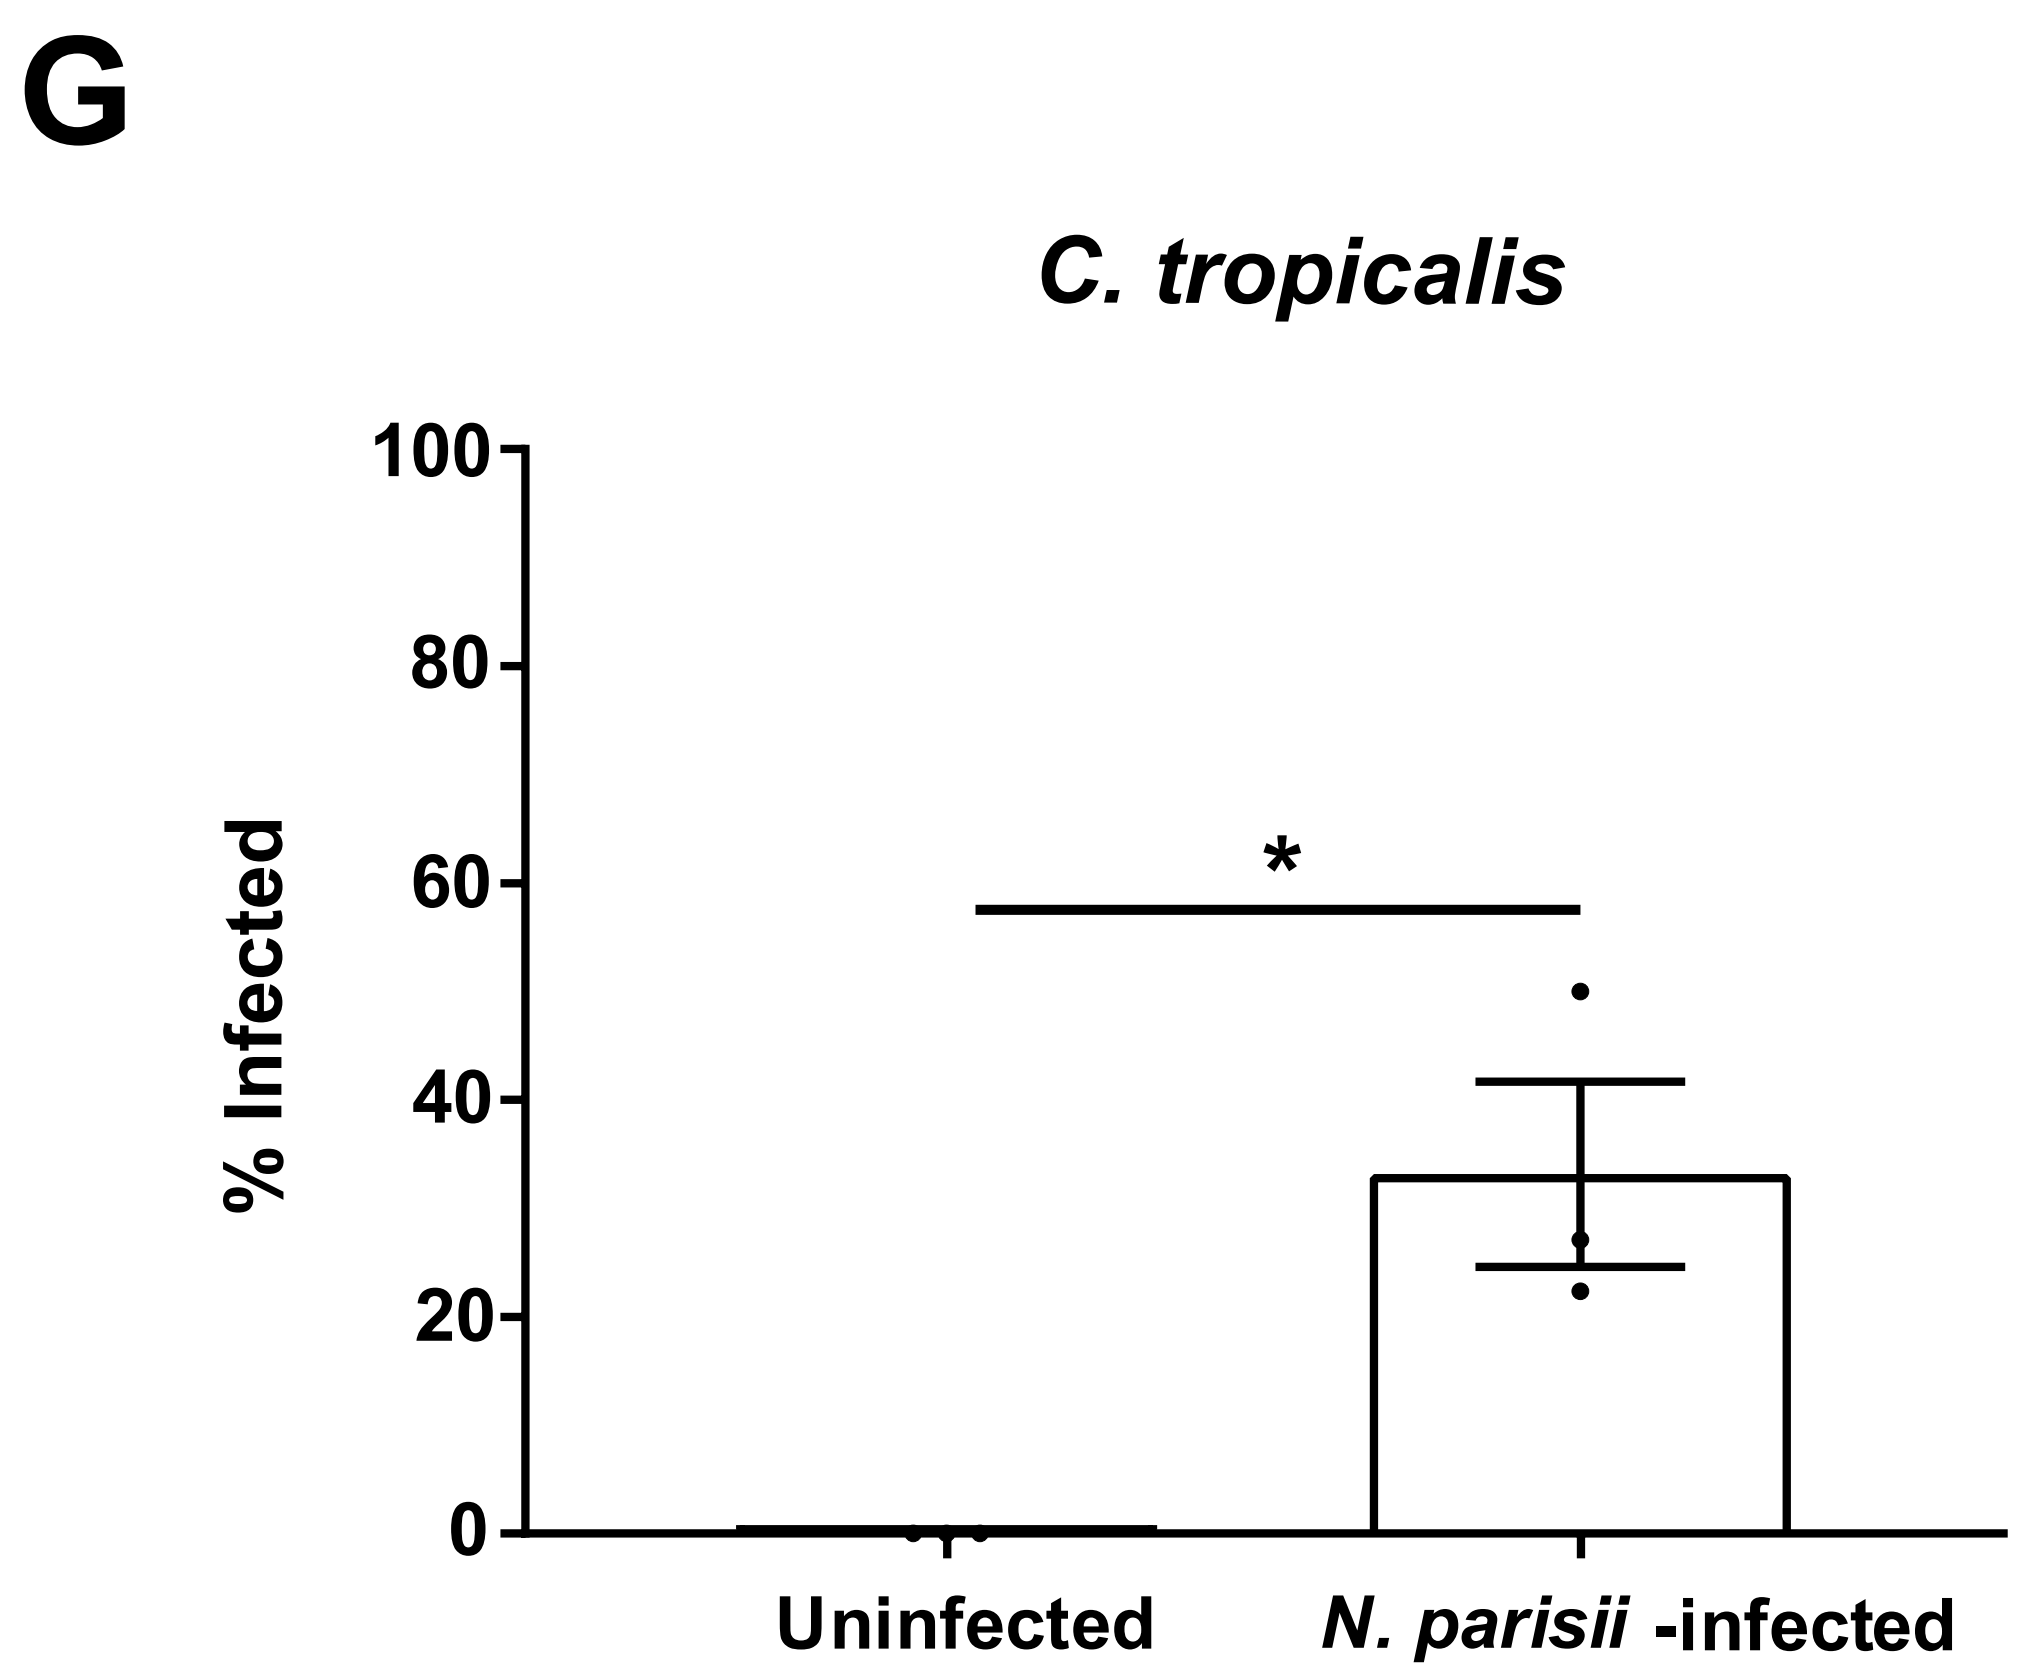

Supplement: supp [file elife_poa_e73425_Figure_1_figure_supplement_1.pdf › elife_poa_e73425_Figure_1_figure_supplement_1.pdf]

**A**

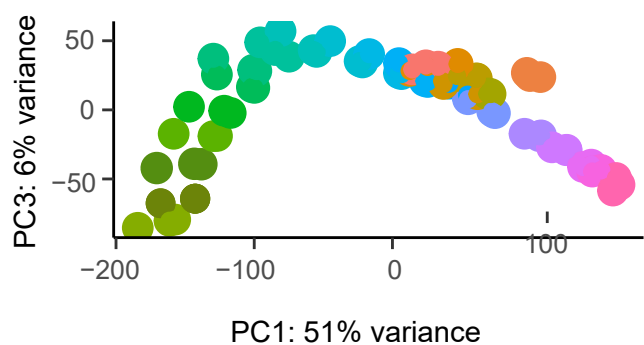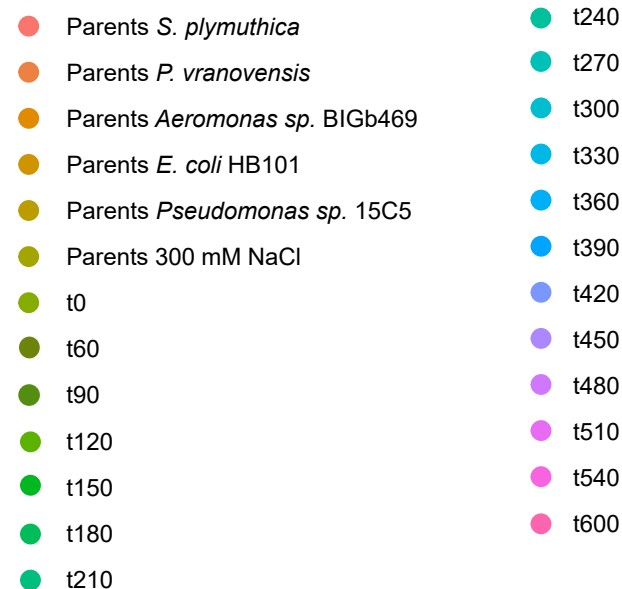

**B**

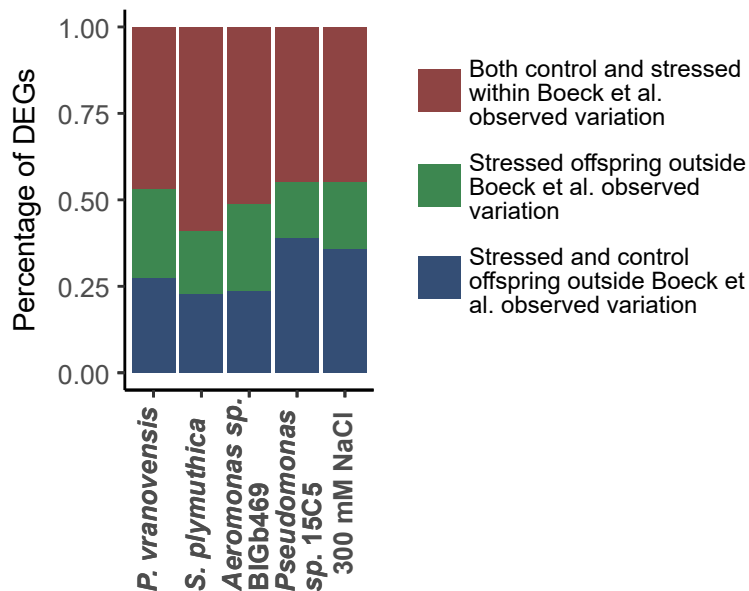

**C**

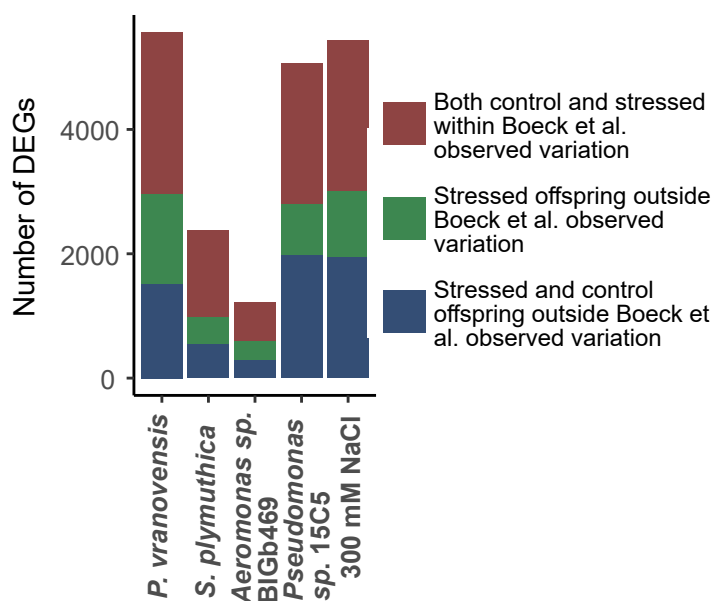

**D**

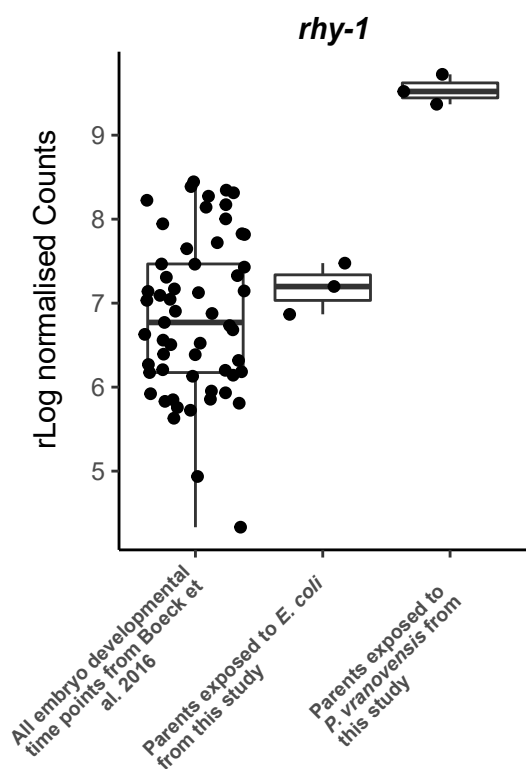

**E**

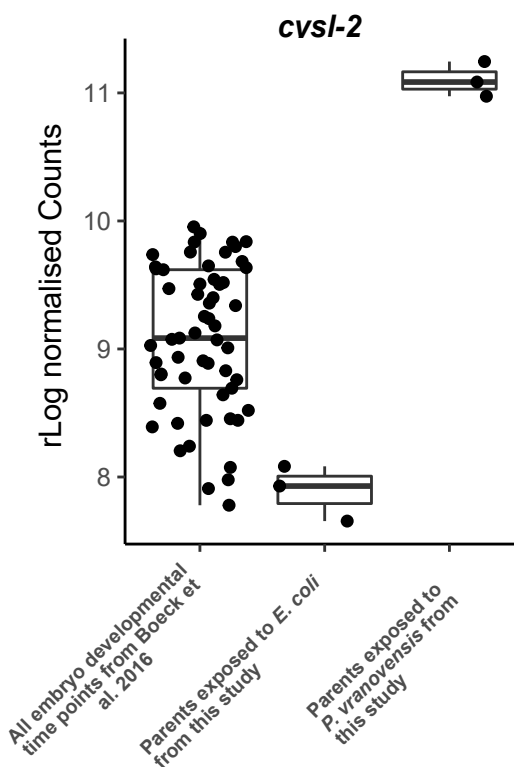

Supplement: supp [file elife_poa_e73425_Figure_2_figure_supplement_1.pdf › elife_poa_e73425_Figure_2_figure_supplement_1.pdf]

24 hours on *P. vranovensis*

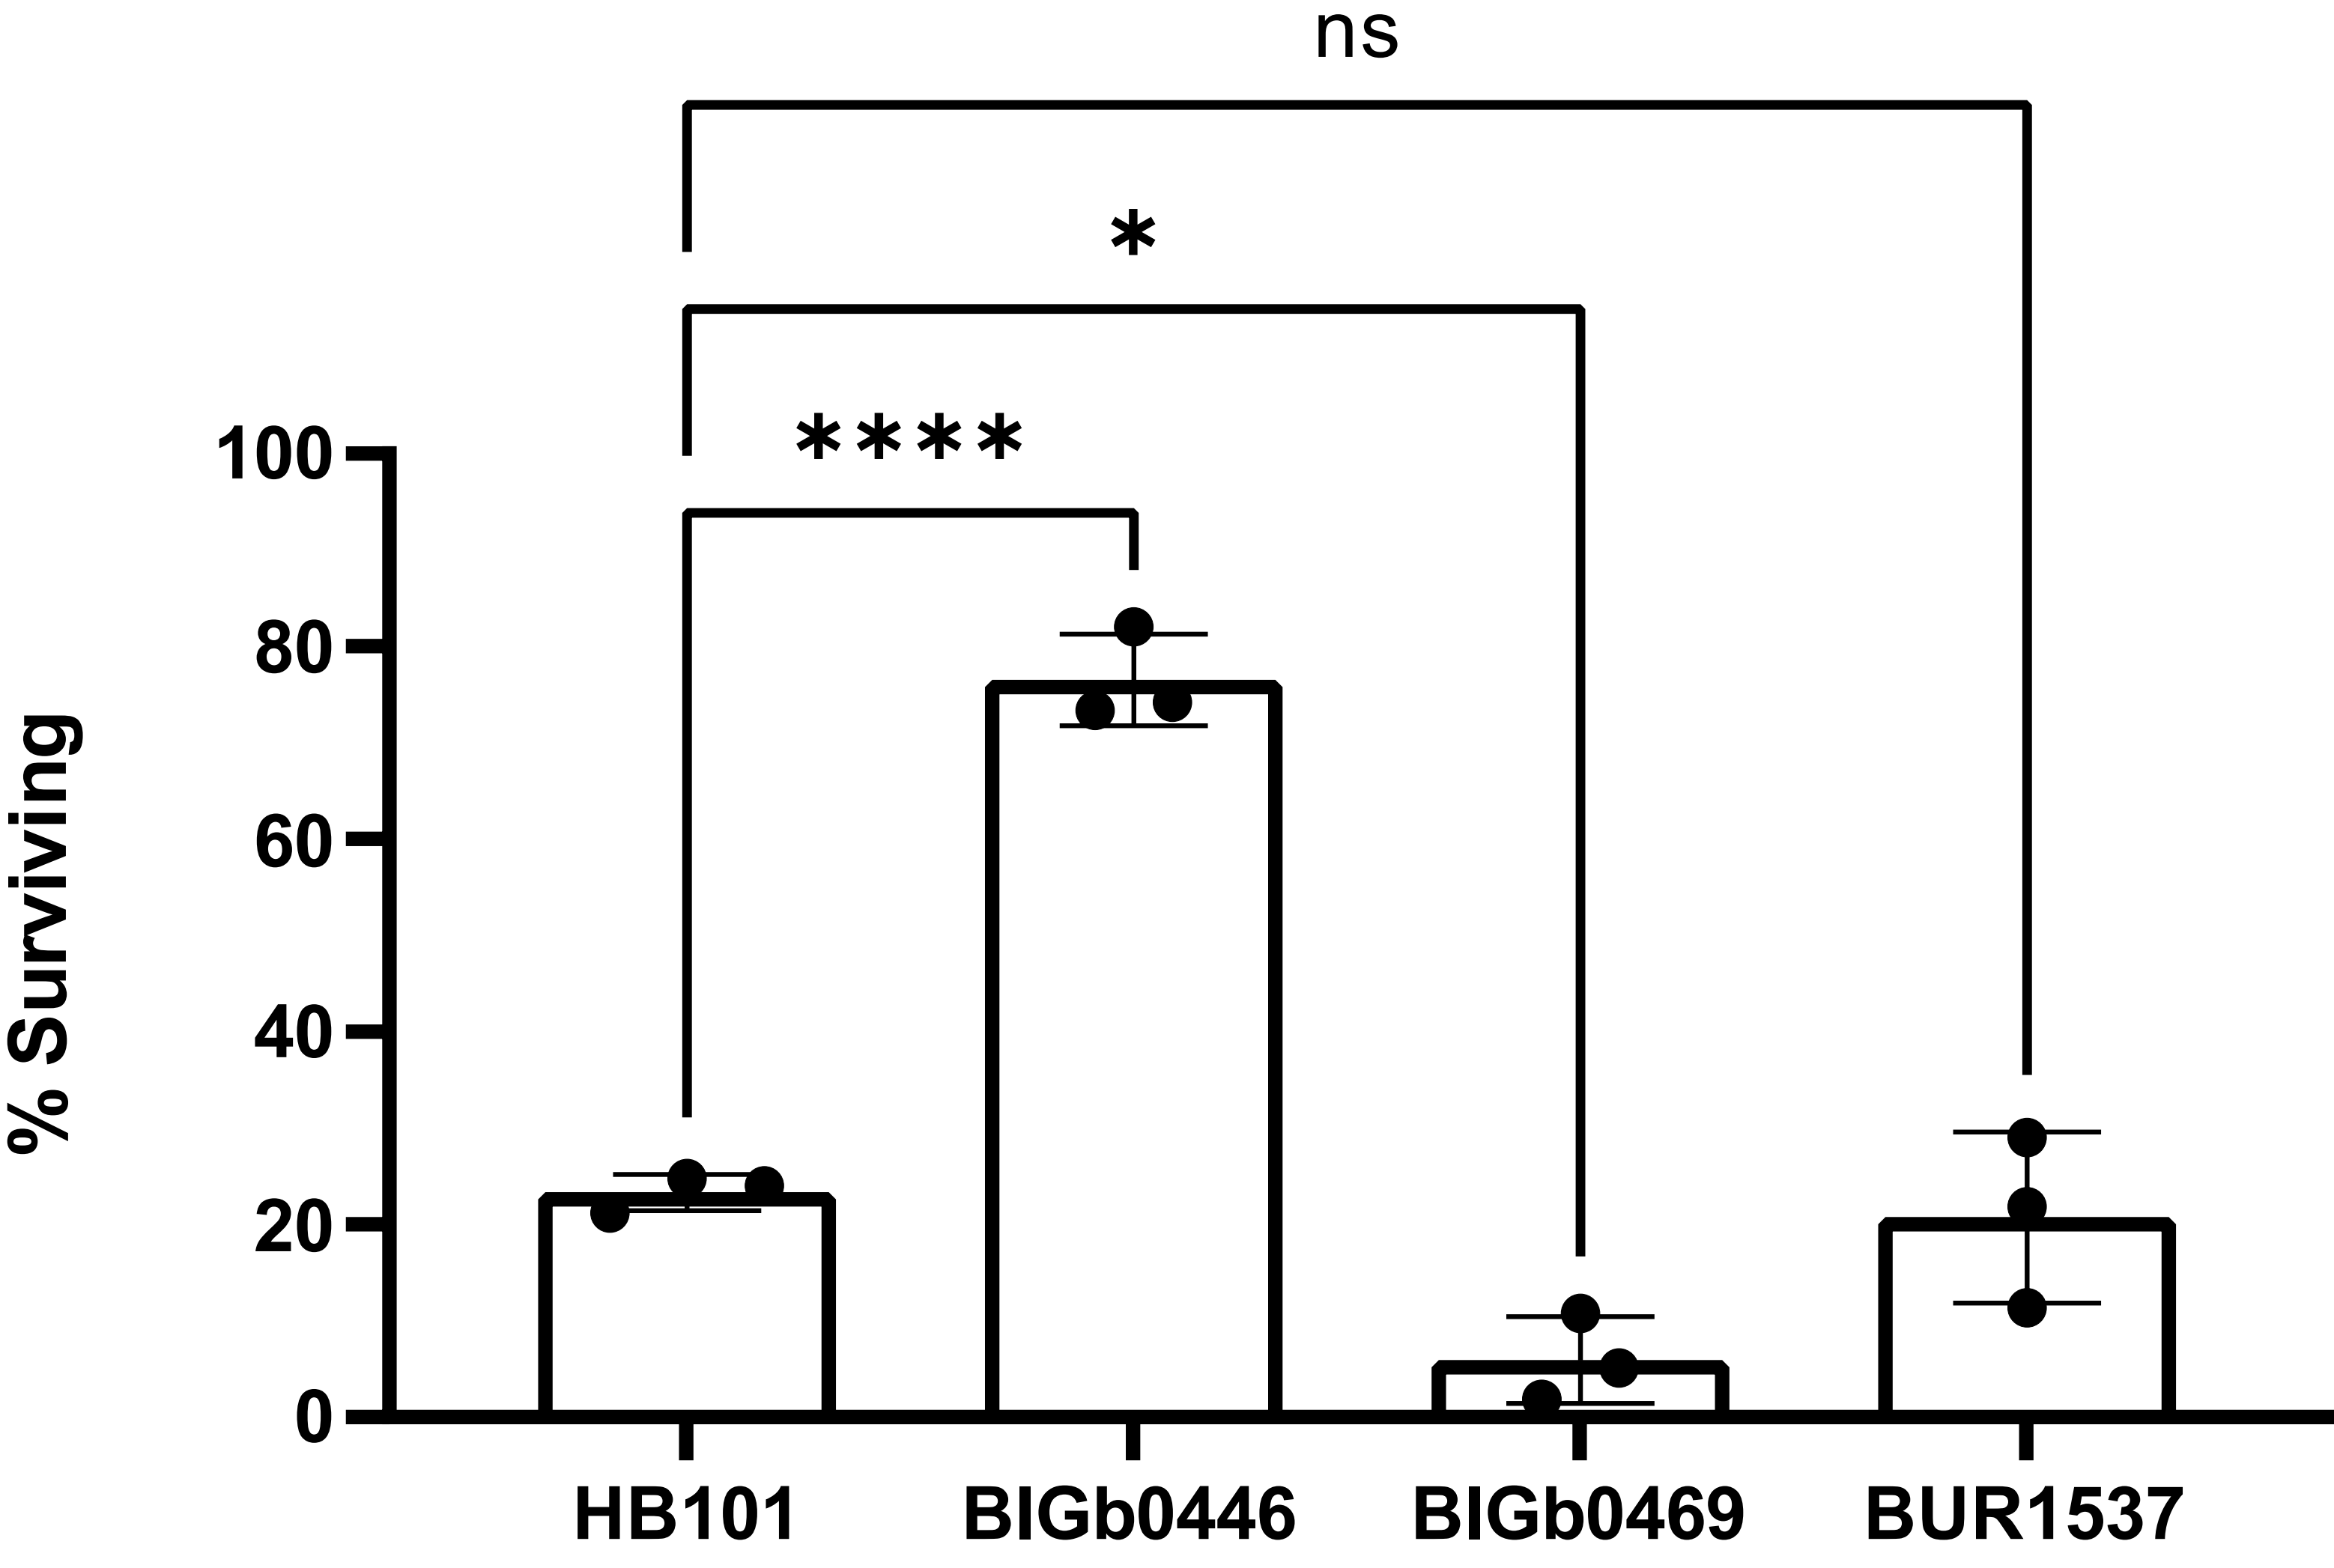

Supplement: supp [file elife_poa_e73425_Figure_4_figure_supplement_1.pdf › elife_poa_e73425_Figure_4_figure_supplement_1.pdf]
